# Supplementary material for: Investigation of somatic single nucleotide variations in human endogenous retrovirus elements and their potential association with cancer
Source: PLoS One. 2019 Apr 1;14(4):e0213770. doi: 10.1371/journal.pone.0213770 (PMC6443178; doi:10.1371/journal.pone.0213770)
Supplement: S1 Table — (XLSX) [file pone.0213770.s003.xlsx]

## Sheet: Sheet1
rvnr	chr	chainstart	chainend	non-canonical	canonical
1114	3	128890677	128887328	ERRANTI
5484	X	73521865	73530986	ERRANTI
6152	1	196839480	196844451	ERV1_ARTIODACT
1601	4	131773207	131781559	ERV1_ARTIODACT
2357	6	142276709	142286528	ERV1_ARTIODACT
2978	8	143802196	143805989	ERV1_ARTIODACT
4028	13	88009099	88002236	ERV1_ARTIODACT
4069	14	21184179	21173274	ERV1_ARTIODACT
4549	18	40934680	40944472	ERV1_ARTIODACT
4820	20	16827015	16815491	ERV24
5804	1	1354232	1347632	HARLEQUIN
6016	1	113368800	113375346	HARLEQUIN
6022	1	114912224	114905953	HARLEQUIN
6092	1	167832329	167839141	HARLEQUIN
6169	1	206288668	206282459	HARLEQUIN
6181	1	211860481	211867798	HARLEQUIN
6211	1	227784330	227777419	HARLEQUIN
6255	1	248069194	248061858	HARLEQUIN
475	2	13673365	13666081	HARLEQUIN
642	2	106602502	106595563	HARLEQUIN
646	2	109140341	109147925	HARLEQUIN
768	2	188375336	188381590	HARLEQUIN
877	3	19531942	19523472	HARLEQUIN
980	3	74874357	74880399	HARLEQUIN
1013	3	87790440	87782825	HARLEQUIN
1124	3	132022337	132014915	HARLEQUIN
1128	3	133738864	133746329	HARLEQUIN
1198	3	161770370	161762524	HARLEQUIN
1339	4	22601186	22607089	HARLEQUIN
1374	4	36907374	36914977	HARLEQUIN
1376	4	37547379	37554100	HARLEQUIN
1387	4	44830681	44822293	HARLEQUIN
1444	4	69442416	69435790	HARLEQUIN
1458	4	72504007	72511517	HARLEQUIN
1503	4	92280533	92274357	HARLEQUIN
1509	4	92967647	92959865	HARLEQUIN
1542	4	104144900	104152436	HARLEQUIN
1575	4	116871787	116877638	HARLEQUIN
1712	4	174019874	174027185	HARLEQUIN
1814	5	37786119	37778378	HARLEQUIN
1824	5	42813609	42819913	HARLEQUIN
1892	5	81569525	81563365	HARLEQUIN
2029	5	158793340	158800664	HARLEQUIN
2039	5	162746476	162740046	HARLEQUIN
2059	6	2318026	2310643	HARLEQUIN
2136	6	47602613	47615665	HARLEQUIN
2208	6	75177897	75184053	HARLEQUIN
2411	7	5068203	5060668	HARLEQUIN
2579	7	100436319	100444821	HARLEQUIN
2630	7	129218030	129226464	HARLEQUIN
2643	7	136953444	136947314	HARLEQUIN
2750	8	24093278	24100406	HARLEQUIN
2823	8	54292177	54279703	HARLEQUIN
2830	8	56618761	56628435	HARLEQUIN
3035	9	29377366	29384675	HARLEQUIN
5360	X	48712217	48720208	HARLEQUIN
5388	X	53539914	53547741	HARLEQUIN
5430	X	62629229	62636588	HARLEQUIN
5448	X	65446100	65438393	HARLEQUIN
5494	X	74869202	74862499	HARLEQUIN
5553	X	84200052	84209663	HARLEQUIN
5657	X	114779843	114772244	HARLEQUIN
5089	Y	14274491	14267560	HARLEQUIN
5108	Y	15394442	15401485	HARLEQUIN
3275	10	61493496	61486281	HARLEQUIN
3323	10	96144275	96152126	HARLEQUIN
3335	10	99321528	99315496	HARLEQUIN
3509	11	59876420	59869057	HARLEQUIN
3510	11	59952908	59960683	HARLEQUIN
3628	11	103443135	103449845	HARLEQUIN
3679	12	3539482	3531754	HARLEQUIN
3838	12	73218523	73212291	HARLEQUIN
4167	14	61588206	61581301	HARLEQUIN
4376	16	34855710	34849284	HARLEQUIN
4465	17	48497628	48490049	HARLEQUIN
4503	18	8913791	8921202	HARLEQUIN
4666	19	22545268	22538210	HARLEQUIN
4818	20	15966836	15960715	HARLEQUIN
915	3	34722358	34726578	HERV1
1079	3	119402674	119414726	HERV1
1086	3	120798354	120787970	HERV1
1153	3	145466464	145473733	HERV1
1570	4	115517530	115507891	HERV1
2174	6	65036016	65049301	HERV1
2346	6	137484171	137491859	HERV1
5383	X	52607860	52597186	HERV1
5109	Y	15451097	15457971	HERV1
3503	11	58537304	58544804	HERV1
4862	21	15487475	15496944	HERV1
5858	1	35612373	35607023	HERV3
911	3	33009064	33014742	HERV3
1063	3	112020702	112027367	HERV3
1449	4	69921569	69930801	HERV3
1452	4	70697205	70691553	HERV3
2081	6	16232012	16223780	HERV3
2128	6	39966768	39961135	HERV3
2242	6	86577333	86564421	HERV3
2651	7	140355292	140369321	HERV3
3171	9	135960539	135951524	HERV3
5568	X	88841575	88831272	HERV3
5680	X	119280362	119289975	HERV3
5043	Y	7058561	7074272	HERV3
5156	Y	19595518	19587168	HERV3
5165	Y	20737787	20725440	HERV3
5167	Y	20759776	20751367	HERV3
5171	Y	20906388	20918735	HERV3
5174	Y	21158521	21166556	HERV3
5197	Y	22959676	22953152	HERV3
5208	Y	23411868	23402108	HERV3
5221	Y	24125887	24142416	HERV3
5230	Y	24752803	24736189	HERV3
5245	Y	25735178	25751703	HERV3
5279	Y	28227196	28210586	HERV3
3241	10	44092081	44078912	HERV3
3489	11	55269215	55272881	HERV3
3518	11	62976968	62982744	HERV3
3551	11	77285983	77280982	HERV3
4048	13	99414131	99419977	HERV3
4235	14	107253952	107244595	HERV3
4289	15	69291635	69280242	HERV3
4434	17	26566203	26557542	HERV3
4508	18	11551958	11544670	HERV3
4628	19	16112565	16109133	HERV3
4652	19	21435968	21447085	HERV3
4682	19	24007068	23999181	HERV3
4778	19	53946363	53936628	HERV3
4777	19	53985466	53972755	HERV3
1008	3	86746155	86740321	HERV30
1184	3	154084687	154096191	HERV30
2924	8	108619109	108609884	HERV30
3254	10	54790427	54781754	HERV30
3844	12	77091815	77085904	HERV30
4443	17	33623937	33643232	HERV30
3814	12	60688397	60696674	HERV35
4350	16	19960250	19971530	HERV35
717	2	153828568	153818333	HERV4
1412	4	56814391	56804401	HERV4
1495	4	89363785	89375033	HERV4
1545	4	104892216	104900288	HERV4
1939	5	109869499	109881304	HERV4
2223	6	80823356	80819229	HERV4
2873	8	83975836	83986129	HERV4
2932	8	114493531	114482429	HERV4
5703	X	129412590	129420710	HERV4
3751	12	32097929	32090007	HERV4
3863	12	88063161	88058050	HERV4
4128	14	44075710	44086280	HERV4
5883	1	48903616	48912303	HERV9
5901	1	58635401	58639782	HERV9
5904	1	63219652	63227864	HERV9
5913	1	66891502	66882930	HERV9
5954	1	87275316	87267516	HERV9
5978	1	96613285	96619301	HERV9
5983	1	101964635	101971850	HERV9
5987	1	103213554	103201193	HERV9
5999	1	105651896	105660837	HERV9
6036	1	121251866	121255921	HERV9
6070	1	155596005	155593642	HERV9
6104	1	172764837	172781779	HERV9
6107	1	173345787	173355182	HERV9
6114	1	175076543	175067095	HERV9
6136	1	188230227	188223384	HERV9
6146	1	195104339	195113890	HERV9
6157	1	199060269	199067123	HERV9
6180	1	211397620	211402997	HERV9
468	2	9043325	9033672	HERV9
517	2	40899133	40906141	HERV9
552	2	63549362	63556676	HERV9
592	2	81263381	81271043	HERV9
624	2	98437573	98445919	HERV9
657	2	117037970	117048323	HERV9
690	2	135569125	135561456	HERV9
734	2	163923164	163933539	HERV9
763	2	184750300	184758381	HERV9
814	2	218986772	218973401	HERV9
876	3	17815789	17823590	HERV9
882	3	20310921	20323320	HERV9
914	3	34565910	34560329	HERV9
920	3	36384219	36376859	HERV9
935	3	44592255	44583974	HERV9
957	3	51775999	51784548	HERV9
958	3	51883819	51891077	HERV9
978	3	73208896	73201972	HERV9
996	3	80356652	80364547	HERV9
1031	3	96016589	96026155	HERV9
1068	3	113065480	113073502	HERV9
1136	3	140590984	140598036	HERV9
1148	3	144627607	144619563	HERV9
1164	3	148288431	148295933	HERV9
1196	3	161569750	161565465	HERV9
1201	3	162294035	162305799	HERV9
1206	3	163522007	163528213	HERV9
1216	3	164531173	164536440	HERV9
1351	4	27976493	27983002	HERV9
1352	4	28304715	28311792	HERV9
1371	4	35866552	35857050	HERV9
1438	4	68147046	68132443	HERV9
1536	4	102559593	102551997	HERV9
1566	4	113128649	113135149	HERV9
1669	4	159578949	159586991	HERV9
1673	4	161583559	161592946	HERV9
1710	4	173298182	173289969	HERV9
1728	4	185657329	185666394	HERV9
1759	5	12853852	12857786	HERV9
1770	5	19305707	19301649	HERV9
1779	5	22930137	22935229	HERV9
1783	5	24387403	24401047	HERV9
1797	5	32560530	32548561	HERV9
1823	5	42111471	42121352	HERV9
1842	5	49748223	49740365	HERV9
1847	5	52528937	52514174	HERV9
1850	5	54387063	54379414	HERV9
1918	5	99319122	99325105	HERV9
1947	5	112958882	112948196	HERV9
1961	5	118766478	118760260	HERV9
1979	5	125557110	125565674	HERV9
2070	6	9722370	9729319	HERV9
2089	6	19273190	19277751	HERV9
2119	6	32461595	32468790	HERV9
2170	6	64045749	64031223	HERV9
2172	6	64733900	64742685	HERV9
2181	6	67414665	67415607	HERV9
2194	6	70179765	70185602	HERV9
2240	6	85796109	85808351	HERV9
2251	6	87391045	87381713	HERV9
2269	6	99714922	99709616	HERV9
2282	6	107268628	107255612	HERV9
2297	6	115318973	115325444	HERV9
2301	6	116412185	116421581	HERV9
2353	6	141496648	141505090	HERV9
2433	7	19700550	19693444	HERV9
2443	7	23901611	23894242	HERV9
2466	7	39793088	39804002	HERV9
2594	7	108939536	108949903	HERV9
2624	7	124949996	124953167	HERV9
2677	7	151733030	151724590	HERV9
2761	8	35789601	35796681	HERV9
2815	8	50569539	50562325	HERV9
2817	8	52211730	52201375	HERV9
2821	8	53989840	53981508	HERV9
2825	8	54355646	54347836	HERV9
2885	8	87947957	87937013	HERV9
2903	8	93413373	93405667	HERV9
2921	8	107801057	107807085	HERV9
3017	9	22434276	22441740	HERV9
3030	9	26825998	26831463	HERV9
3074	9	79110608	79103218	HERV9
3078	9	81046216	81057948	HERV9
3092	9	88778465	88762111	HERV9
5464	X	70719982	70717838	HERV9
5624	X	104127516	104141731	HERV9
5643	X	111359934	111352493	HERV9
5656	X	114743963	114733310	HERV9
5699	X	126530736	126537959	HERV9
5713	X	134784574	134791129	HERV9
5763	X	150731087	150719396	HERV9
5047	Y	7256208	7245496	HERV9
5055	Y	8080482	8072888	HERV9
5092	Y	14387573	14377113	HERV9
5119	Y	16467058	16460652	HERV9
5123	Y	16931568	16927676	HERV9
5130	Y	17373614	17384060	HERV9
5131	Y	17505638	17498389	HERV9
5150	Y	19302465	19295935	HERV9
5154	Y	19460423	19453255	HERV9
5177	Y	21269083	21265314	HERV9
5202	Y	23190698	23182874	HERV9
5223	Y	24406428	24401763	HERV9
5266	Y	27246351	27233718	HERV9
3189	10	5905456	5910787	HERV9
3199	10	17060764	17052206	HERV9
3204	10	22427882	22435444	HERV9
3258	10	56055062	56060967	HERV9
3263	10	58338496	58331194	HERV9
3283	10	66545722	66536582	HERV9
3286	10	69450406	69443523	HERV9
3317	10	91166045	91177228	HERV9
3364	10	118262664	118250188	HERV9
3367	10	121643247	121650257	HERV9
3422	11	25028687	25021588	HERV9
3441	11	38132752	38142084	HERV9
3448	11	39581832	39588887	HERV9
3574	11	85317355	85325045	HERV9
3611	11	96507214	96514444	HERV9
3616	11	98295373	98289696	HERV9
3642	11	110267035	110280086	HERV9
3692	12	8939660	8949032	HERV9
3715	12	14367819	14375836	HERV9
3726	12	18185496	18196130	HERV9
3854	12	82768152	82761846	HERV9
3874	12	91378466	91386224	HERV9
3919	12	131821128	131825881	HERV9
3937	13	27786499	27794646	HERV9
3964	13	55274830	55281718	HERV9
3978	13	62723207	62732373	HERV9
3980	13	63808042	63811512	HERV9
4027	13	87987496	87994818	HERV9
4050	13	100149006	100140878	HERV9
4051	13	100732464	100740921	HERV9
4052	13	100935687	100938542	HERV9
4056	13	108549835	108537375	HERV9
4100	14	32181419	32171196	HERV9
4260	15	45165998	45156237	HERV9
4261	15	45305409	45306916	HERV9
4271	15	51649784	51659777	HERV9
4353	16	21648846	21640935	HERV9
4391	16	57432949	57431016	HERV9
4471	17	52363860	52372421	HERV9
4472	17	52406007	52408285	HERV9
4483	17	72906167	72911439	HERV9
4521	18	23825764	23811639	HERV9
4559	18	48643546	48639226	HERV9
4593	19	5165752	5158661	HERV9
4601	19	8444177	8451528	HERV9
4604	19	9433731	9423983	HERV9
4720	19	39313748	39328073	HERV9
4828	20	23716500	23723399	HERV9
4870	21	18669567	18679158	HERV9
6253	1	247517612	247526674	HERVADP
1643	4	144101612	144099099	HERVADP
5610	X	99831900	99822827	HERVADP
3498	11	56716600	56720012	HERVADP
3684	12	7740826	7760343	HERVADP
3970	13	56454026	56445450	HERVADP
4035	13	90939333	90946578	HERVADP
4440	17	31291068	31301355	HERVADP
5875	1	46797980	46791220	HERVE
5966	1	92138005	92128008	HERVE
5992	1	104197693	104191702	HERVE
5994	1	104240675	104244282	HERVE
5993	1	104291831	104285840	HERVE
5997	1	105010911	105002402	HERVE
6084	1	161380483	161373968	HERVE
6128	1	186891999	186883565	HERVE
559	2	65126965	65113446	HERVE
568	2	71248036	71251602	HERVE
726	2	159703523	159705757	HERVE
728	2	159721812	159736229	HERVE
727	2	159738625	159746363	HERVE
837	2	232265588	232273390	HERVE
863	3	8715554	8719287	HERVE
884	3	20412938	20405455	HERVE
982	3	75185422	75193811	HERVE
983	3	75414870	75409207	HERVE
987	3	75656765	75651388	HERVE
995	3	79822132	79829923	HERVE
1096	3	125414207	125417755	HERVE
1098	3	125436139	125441809	HERVE
1097	3	125459065	125464433	HERVE
1116	3	129748306	129743074	HERVE
1189	3	157305652	157297217	HERVE
1288	4	3898392	3895112	HERVE
1296	4	4135635	4132411	HERVE
1295	4	4166037	4162483	HERVE
1294	4	4172275	4165673	HERVE
1300	4	8943997	8949591	HERVE
1299	4	8975252	8978813	HERVE
1302	4	9096176	9110176	HERVE
1309	4	9452916	9457686	HERVE
1308	4	9478464	9482016	HERVE
1310	4	9507338	9521165	HERVE
1315	4	9762576	9766632	HERVE
1365	4	35102175	35110604	HERVE
1595	4	129181483	129188841	HERVE
1648	4	147447516	147457216	HERVE
1703	4	171606515	171611460	HERVE
1899	5	85757815	85760028	HERVE
1901	5	85866838	85860992	HERVE
2054	5	178483364	178474879	HERVE
2273	6	101680852	101671464	HERVE
2413	7	6885574	6880399	HERVE
2415	7	6998373	6987333	HERVE
2445	7	24835419	24828999	HERVE
2574	7	97589655	97578215	HERVE
2637	7	134858785	134869218	HERVE
2696	8	6926530	6938516	HERVE
2698	8	7111269	7098885	HERVE
2706	8	7443355	7455790	HERVE
2710	8	7570577	7564040	HERVE
2716	8	7891347	7903787	HERVE
2721	8	8029355	8038841	HERVE
2730	8	11768177	11759373	HERVE
2731	8	11794226	11789351	HERVE
2732	8	11899032	11895481	HERVE
2735	8	12145597	12142046	HERVE
2737	8	12351823	12342057	HERVE
2741	8	12549440	12545899	HERVE
2740	8	12570885	12564387	HERVE
2776	8	41455845	41448452	HERVE
2977	8	140562614	140559143	HERVE
3100	9	92986135	92989988	HERVE
3103	9	93521649	93515904	HERVE
3176	9	138336355	138329153	HERVE
5361	X	49005253	48996114	HERVE
5371	X	50081532	50072999	HERVE
5510	X	76514187	76522863	HERVE
5658	X	115040430	115033010	HERVE
5729	X	141352988	141361566	HERVE
5771	X	155207094	155198723	HERVE
5038	Y	6252120	6264432	HERVE
5057	Y	8401668	8414796	HERVE
5062	Y	8512101	8523384	HERVE
5064	Y	8671224	8679761	HERVE
5066	Y	8730786	8739252	HERVE
5074	Y	9126928	9115428	HERVE
5078	Y	9617761	9607814	HERVE
5091	Y	14363817	14372236	HERVE
5096	Y	14589926	14577299	HERVE
5129	Y	17367042	17374557	HERVE
5145	Y	18756638	18748207	HERVE
3195	10	15027146	15018279	HERVE
3194	10	15040890	15026385	HERVE
3196	10	15061214	15053464	HERVE
3291	10	73699133	73706266	HERVE
3307	10	85868521	85876949	HERVE
3380	11	3503329	3494250	HERVE
3513	11	60861050	60867285	HERVE
3523	11	67499058	67494280	HERVE
3529	11	67749512	67745973	HERVE
3539	11	71297276	71302712	HERVE
3540	11	71323138	71326680	HERVE
3544	11	71597042	71602782	HERVE
3545	11	71619191	71628377	HERVE
3548	11	74750961	74758198	HERVE
3594	11	92850511	92837140	HERVE
3624	11	101115035	101123038	HERVE
3689	12	8578375	8569248	HERVE
3733	12	21100046	21089996	HERVE
3797	12	52512192	52505819	HERVE
3841	12	74658204	74666625	HERVE
3888	12	101042113	101026883	HERVE
3949	13	41455297	41448346	HERVE
3950	13	42000184	41993334	HERVE
3991	13	67971504	67979833	HERVE
4150	14	52215253	52219275	HERVE
4281	15	55809294	55803016	HERVE
4354	16	25160805	25152118	HERVE
4444	17	33827781	33835374	HERVE
4466	17	50668475	50680217	HERVE
4565	18	53617711	53625085	HERVE
4614	19	9840211	9834366	HERVE
4618	19	12059800	12053402	HERVE
4641	19	20701171	20692820	HERVE
4700	19	29097422	29106221	HERVE
4752	19	50853441	50850715	HERVE
4770	19	53408687	53401768	HERVE
4772	19	53459755	53463806	HERVE
4830	20	24900078	24913663	HERVE
4890	21	34032869	34037069	HERVE
5816	1	9146859	9156088	HERVFA
510	2	37352066	37364770	HERVFA
2384	6	159042210	159032735	HERVFA
2631	7	129959790	129952218	HERVFA
3165	9	132358842	132349503	HERVFA
3907	12	118929833	118915563	HERVFA
4053	13	101871838	101881171	HERVFA
5814	1	6630498	6620574	HERVFB
5815	1	8981294	8987180	HERVFB
1176	3	151523937	151529813	HERVFB
2074	6	11788438	11792407	HERVFB
2084	6	17327587	17319199	HERVFB
2428	7	12635935	12629614	HERVFB
2804	8	48911810	48901677	HERVFB
2902	8	93376554	93394262	HERVFB
5440	X	64062419	64070733	HERVFB
3290	10	73714809	73709417	HERVFB
3433	11	31631083	31629722	HERVFB
4224	14	102700510	102712106	HERVFB
4361	16	30558083	30552390	HERVFB
4633	19	20054579	20067464	HERVFB
597	2	84106618	84101057	HERVFC
2679	7	153110891	153102836	HERVFC
3392	11	5949859	5960181	HERVFC
5808	1	4247633	4238529	HERVH
5850	1	32898159	32908061	HERVH
5855	1	35102814	35096515	HERVH
5856	1	35604836	35598359	HERVH
5870	1	43551246	43562427	HERVH
5890	1	53890302	53898617	HERVH
5894	1	55369257	55359311	HERVH
5895	1	55486717	55499346	HERVH
5909	1	66113719	66103451	HERVH
5917	1	68851833	68861681	HERVH
5918	1	70832545	70838056	HERVH
5925	1	73449659	73446511	HERVH
5924	1	73459305	73450182	HERVH
5939	1	80110178	80102407	HERVH
5944	1	82538559	82530870	HERVH
5952	1	86805460	86810356	HERVH
5970	1	94295469	94303642	HERVH
5998	1	105140060	105146407	HERVH
6005	1	109015757	109023005	HERVH
6075	1	157248138	157238699	HERVH
6088	1	163561099	163566792	HERVH
6095	1	169652623	169660442	HERVH
6123	1	183582345	183591578	HERVH
6124	1	183678445	183670024	HERVH
6132	1	187740021	187732447	HERVH
6155	1	198003781	198011256	HERVH
6174	1	209622150	209628971	HERVH
6184	1	213080655	213093254	HERVH
6195	1	222121123	222131977	HERVH
6199	1	223203498	223195392	HERVH
6218	1	229548243	229556356	HERVH
6223	1	232253861	232261287	HERVH
6226	1	233824950	233816934	HERVH
6229	1	237102103	237090167	HERVH
6231	1	239264692	239272470	HERVH
461	2	3868930	3861805	HERVH
465	2	5140901	5148404	HERVH
483	2	16979466	16969580	HERVH
491	2	20280900	20287039	HERVH
504	2	34919706	34927896	HERVH
507	2	35668731	35659684	HERVH
508	2	36037362	36042968	HERVH
509	2	36826243	36835658	HERVH
511	2	37613839	37609316	HERVH
524	2	44251849	44243235	HERVH
544	2	57420130	57427344	HERVH
543	2	57454515	57462335	HERVH
549	2	60644754	60652073	HERVH
557	2	64307578	64300401	HERVH
558	2	64479809	64485699	HERVH
562	2	67558091	67566726	HERVH
569	2	71392739	71384906	HERVH
576	2	75446681	75438109	HERVH
596	2	84021604	84014269	HERVH
611	2	90189973	90181875	HERVH
693	2	138446025	138441082	HERVH
707	2	150968139	150973854	HERVH
720	2	155444102	155440632	HERVH
724	2	157582422	157570803	HERVH
744	2	169985950	169994059	HERVH
747	2	171839896	171830243	HERVH
749	2	173406819	173413486	HERVH
777	2	193370649	193382697	HERVH
787	2	198443157	198452410	HERVH
791	2	204832293	204824737	HERVH
794	2	207677351	207669189	HERVH
795	2	207881942	207889452	HERVH
796	2	209086664	209078353	HERVH
800	2	209758492	209770193	HERVH
803	2	210164296	210170391	HERVH
805	2	212124717	212131149	HERVH
813	2	216787026	216795629	HERVH
817	2	219044613	219033893	HERVH
826	2	224060108	224053484	HERVH
830	2	225088644	225095057	HERVH
831	2	225161343	225168985	HERVH
838	2	234126475	234122261	HERVH
843	2	238515429	238524151	HERVH
850	3	938473	929717	HERVH
852	3	1286698	1274519	HERVH
874	3	16785543	16794841	HERVH
902	3	27641875	27644641	HERVH
906	3	32108959	32117996	HERVH
909	3	32509206	32500096	HERVH
928	3	39625113	39616594	HERVH
930	3	40602362	40611763	HERVH
933	3	44391885	44382356	HERVH
936	3	44903300	44897453	HERVH
940	3	46293556	46285866	HERVH
941	3	46374348	46371159	HERVH
967	3	58570741	58581463	HERVH
975	3	70489570	70483048	HERVH
989	3	76587767	76578619	HERVH
991	3	78373092	78381703	HERVH
992	3	78638069	78630359	HERVH
997	3	80435655	80439094	HERVH
1004	3	84243990	84235663	HERVH
1012	3	87616309	87627728	HERVH
1023	3	93656890	93674598	HERVH
1033	3	96996219	96988177	HERVH
1035	3	97910117	97917591	HERVH
1058	3	107291634	107283062	HERVH
1064	3	112142228	112131867	HERVH
1074	3	115518013	115508810	HERVH
1110	3	128553701	128547065	HERVH
1127	3	133148592	133156058	HERVH
1132	3	137314428	137321194	HERVH
1149	3	144830272	144837022	HERVH
1179	3	152314393	152323757	HERVH
1182	3	153546921	153538371	HERVH
1186	3	154998587	154991215	HERVH
1194	3	161446091	161437556	HERVH
1219	3	166224213	166217226	HERVH
1233	3	170542348	170533766	HERVH
1245	3	175780297	175789161	HERVH
1248	3	177388928	177374832	HERVH
1251	3	179233093	179244970	HERVH
1259	3	185098381	185090084	HERVH
1262	3	186375563	186386951	HERVH
1265	3	186898847	186891984	HERVH
1266	3	187189788	187181535	HERVH
1267	3	189862389	189869851	HERVH
1268	3	190637949	190646163	HERVH
1274	3	191619057	191609975	HERVH
1275	3	191794657	191786977	HERVH
1276	3	192713425	192719617	HERVH
1313	4	9640061	9648771	HERVH
1323	4	11808074	11814668	HERVH
1335	4	20194383	20199906	HERVH
1342	4	23729450	23724000	HERVH
1347	4	24502598	24509650	HERVH
1366	4	35024031	35019753	HERVH
1440	4	68895049	68901769	HERVH
1443	4	69443959	69447014	HERVH
1476	4	79640875	79634688	HERVH
1477	4	80481757	80469047	HERVH
1493	4	88842955	88848484	HERVH
1494	4	89270458	89263608	HERVH
1505	4	92544767	92555617	HERVH
1506	4	92582414	92573809	HERVH
1510	4	92945136	92952323	HERVH
1516	4	95011209	95006830	HERVH
1520	4	95220731	95213015	HERVH
1543	4	104481864	104470653	HERVH
1544	4	104862639	104869665	HERVH
1574	4	116903055	116893246	HERVH
1589	4	126489816	126483814	HERVH
1590	4	127071698	127064964	HERVH
1596	4	129567771	129560079	HERVH
1599	4	131688564	131697419	HERVH
1605	4	133039316	133047095	HERVH
1622	4	135607562	135598284	HERVH
1645	4	146177925	146172237	HERVH
1646	4	146619975	146625954	HERVH
1647	4	146753953	146763180	HERVH
1654	4	153668299	153662508	HERVH
1659	4	154976487	154984543	HERVH
1662	4	155846772	155840658	HERVH
1663	4	156035401	156027780	HERVH
1679	4	164024940	164014322	HERVH
1691	4	168363315	168358082	HERVH
1692	4	168797447	168804652	HERVH
1693	4	168844117	168851861	HERVH
1720	4	177221441	177213114	HERVH
1722	4	180091747	180086456	HERVH
1723	4	180323219	180334089	HERVH
1724	4	180641665	180649474	HERVH
1725	4	183735463	183743165	HERVH
1739	4	190846436	190854462	HERVH
1744	5	702586	709322	HERVH
1747	5	5515636	5525368	HERVH
1748	5	7063815	7055294	HERVH
1749	5	7263666	7272205	HERVH
1753	5	9009455	8996812	HERVH
1757	5	12488478	12493133	HERVH
1767	5	18676262	18667054	HERVH
1778	5	22094109	22103254	HERVH
1827	5	43333557	43320925	HERVH
1829	5	43786583	43798281	HERVH
1830	5	44120215	44110605	HERVH
1846	5	52494469	52509169	HERVH
1884	5	76185385	76177041	HERVH
1896	5	83994577	84000990	HERVH
1905	5	92159201	92171590	HERVH
1908	5	95507881	95500514	HERVH
1912	5	97415328	97428887	HERVH
1921	5	100325928	100318541	HERVH
1932	5	106313618	106322399	HERVH
1962	5	120038953	120031098	HERVH
1981	5	126011979	126004750	HERVH
1992	5	130907491	130917873	HERVH
1994	5	135073027	135066076	HERVH
1995	5	135637022	135643342	HERVH
1997	5	135887501	135880645	HERVH
2010	5	143996463	143988892	HERVH
2014	5	147254089	147247841	HERVH
2019	5	152835501	152826711	HERVH
2033	5	160673602	160680837	HERVH
2035	5	161708166	161700725	HERVH
2043	5	166171688	166164251	HERVH
2044	5	166730381	166720109	HERVH
2045	5	170194868	170186473	HERVH
2046	5	170435720	170427088	HERVH
2055	5	179847673	179835151	HERVH
2061	6	3167454	3174151	HERVH
2065	6	6033857	6026668	HERVH
2078	6	14303075	14294874	HERVH
2083	6	16885590	16893928	HERVH
2086	6	18760532	18752948	HERVH
2091	6	19539757	19548150	HERVH
2092	6	21367293	21356152	HERVH
2123	6	33308627	33320215	HERVH
2188	6	68584812	68579214	HERVH
2218	6	79293463	79298853	HERVH
2224	6	81198060	81185201	HERVH
2262	6	94547275	94534905	HERVH
2266	6	98227169	98237585	HERVH
2276	6	102740602	102748568	HERVH
2285	6	110183056	110172994	HERVH
2294	6	114339172	114332160	HERVH
2296	6	115351890	115364142	HERVH
2313	6	120789229	120782027	HERVH
2318	6	121947667	121938465	HERVH
2323	6	123160014	123166893	HERVH
2324	6	123877989	123883802	HERVH
2328	6	125211553	125218908	HERVH
2329	6	126028626	126021449	HERVH
2339	6	131615512	131621410	HERVH
2337	6	131659917	131669325	HERVH
2340	6	131722593	131735334	HERVH
2349	6	140584217	140576576	HERVH
2365	6	145244528	145253584	HERVH
2370	6	146777626	146768312	HERVH
2377	6	152811764	152818311	HERVH
2380	6	154244343	154259208	HERVH
2390	6	161198478	161201135	HERVH
2393	6	164765839	164757983	HERVH
2417	7	6943413	6951928	HERVH
2420	7	9398860	9391825	HERVH
2421	7	9503855	9491462	HERVH
2435	7	20585399	20595274	HERVH
2457	7	32883277	32871638	HERVH
2492	7	52407903	52401836	HERVH
2557	7	92114322	92107347	HERVH
2580	7	100521404	100531265	HERVH
2613	7	120955434	120962355	HERVH
2618	7	122457235	122467767	HERVH
2621	7	124607843	124597365	HERVH
2650	7	139146365	139153410	HERVH
2653	7	141284246	141275447	HERVH
2662	7	143240598	143234797	HERVH
2663	7	143483049	143490835	HERVH
2667	7	145946276	145937616	HERVH
2668	7	147306047	147298297	HERVH
2670	7	148012707	148003388	HERVH
2683	8	3100970	3093309	HERVH
2703	8	7259812	7266137	HERVH
2765	8	37861886	37854076	HERVH
2852	8	69883648	69890199	HERVH
2856	8	72587172	72595473	HERVH
2871	8	82826109	82830977	HERVH
2875	8	84455931	84462863	HERVH
2891	8	89761247	89754222	HERVH
2899	8	92959695	92969705	HERVH
2912	8	98847845	98839826	HERVH
2933	8	114528651	114522951	HERVH
2938	8	115252397	115261980	HERVH
2941	8	116825408	116830207	HERVH
2946	8	120890876	120885899	HERVH
2955	8	128443946	128453151	HERVH
2957	8	129629882	129620941	HERVH
2964	8	132833082	132838531	HERVH
2965	8	133098249	133087862	HERVH
2971	8	138426791	138421808	HERVH
2993	9	3816769	3809395	HERVH
3026	9	25994622	26001363	HERVH
3050	9	35003405	35011005	HERVH
3052	9	35025458	35019243	HERVH
3081	9	82752251	82760393	HERVH
3085	9	85321298	85314595	HERVH
3087	9	85498644	85506614	HERVH
3090	9	88495891	88501197	HERVH
3095	9	90025242	90036988	HERVH
3101	9	93175201	93180969	HERVH
3138	9	109549788	109555265	HERVH
3149	9	117942614	117934744	HERVH
3150	9	118235460	118241986	HERVH
3166	9	134421486	134428529	HERVH
3178	9	140738666	140744014	HERVH
5287	X	3478202	3471184	HERVH
5290	X	4464239	4458164	HERVH
5292	X	4809655	4818131	HERVH
5302	X	12957984	12965449	HERVH
5304	X	16069488	16056163	HERVH
5305	X	16202590	16193875	HERVH
5331	X	30121886	30128691	HERVH
5332	X	30475105	30460044	HERVH
5343	X	35626774	35636422	HERVH
5346	X	37320318	37311181	HERVH
5437	X	63867289	63883782	HERVH
5445	X	64581770	64585059	HERVH
5476	X	72747794	72756253	HERVH
5479	X	73029220	73021293	HERVH
5574	X	89945833	89961479	HERVH
5575	X	90035036	90028018	HERVH
5579	X	91360673	91351286	HERVH
5584	X	92275728	92283187	HERVH
5591	X	93960088	93952886	HERVH
5618	X	102690919	102681057	HERVH
5620	X	103020620	103017250	HERVH
5645	X	112358179	112347999	HERVH
5646	X	112426927	112416811	HERVH
5652	X	113701278	113711199	HERVH
5664	X	115461544	115472600	HERVH
5671	X	116413266	116419760	HERVH
5678	X	118458608	118452654	HERVH
5686	X	121355857	121363711	HERVH
5691	X	124528411	124520701	HERVH
5696	X	125996530	126004642	HERVH
5718	X	137352181	137342816	HERVH
5755	X	148397177	148406845	HERVH
5035	Y	5809152	5817483	HERVH
5036	Y	6005031	6012488	HERVH
5048	Y	7368631	7377645	HERVH
5151	Y	19253729	19243014	HERVH
5173	Y	21111765	21106633	HERVH
5200	Y	23058516	23067617	HERVH
5201	Y	23206978	23197846	HERVH
3187	10	5512731	5521696	HERVH
3193	10	6844915	6838014	HERVH
3203	10	20413863	20406939	HERVH
3222	10	35699048	35691988	HERVH
3245	10	46066830	46072762	HERVH
3250	10	53799321	53788498	HERVH
3256	10	55264487	55249822	HERVH
3297	10	78577979	78586517	HERVH
3318	10	91846549	91839808	HERVH
3334	10	98491747	98497930	HERVH
3339	10	101017919	101028538	HERVH
3358	10	111321785	111326558	HERVH
3366	10	120649294	120664259	HERVH
3370	10	122604425	122611092	HERVH
3385	11	4247969	4241807	HERVH
3386	11	4344572	4338447	HERVH
3389	11	5188363	5180500	HERVH
3394	11	6387258	6396126	HERVH
3397	11	7541705	7534746	HERVH
3406	11	14546104	14549171	HERVH
3413	11	20589401	20600326	HERVH
3421	11	23914421	23904039	HERVH
3423	11	25350926	25347960	HERVH
3425	11	25517618	25507818	HERVH
3432	11	29995078	30001837	HERVH
3451	11	42141166	42146873	HERVH
3492	11	55325952	55331586	HERVH
3491	11	55344560	55353909	HERVH
3521	11	66341292	66348729	HERVH
3530	11	68390413	68401623	HERVH
3531	11	68401400	68409700	HERVH
3537	11	70066106	70055744	HERVH
3542	11	71451758	71460920	HERVH
3550	11	77260025	77274097	HERVH
3559	11	80831447	80837349	HERVH
3568	11	83128959	83135118	HERVH
3567	11	83147620	83139643	HERVH
3580	11	87775605	87781625	HERVH
3610	11	96458635	96467463	HERVH
3644	11	110922930	110929218	HERVH
3651	11	117681535	117683366	HERVH
3656	11	121514200	121503275	HERVH
3659	11	122695136	122705359	HERVH
3674	11	130629047	130622881	HERVH
3675	11	131131067	131120533	HERVH
3680	12	4128162	4135029	HERVH
3698	12	9990398	9985547	HERVH
3701	12	10121255	10112145	HERVH
3711	12	11768067	11759688	HERVH
3713	12	12210874	12221482	HERVH
3720	12	14863576	14855719	HERVH
3724	12	17622829	17632842	HERVH
3730	12	20915056	20931608	HERVH
3731	12	20975355	20969111	HERVH
3780	12	44843262	44851942	HERVH
3783	12	46425910	46429066	HERVH
3784	12	46720081	46714202	HERVH
3788	12	48509227	48503076	HERVH
3811	12	59494981	59503856	HERVH
3818	12	61980887	61987932	HERVH
3832	12	70479070	70485749	HERVH
3836	12	73108784	73099279	HERVH
3839	12	73401507	73394315	HERVH
3843	12	76685398	76694630	HERVH
3850	12	81182682	81176303	HERVH
3861	12	87332228	87340723	HERVH
3864	12	88306613	88297709	HERVH
3868	12	88761298	88769226	HERVH
3883	12	96142786	96151455	HERVH
3886	12	100108957	100117574	HERVH
3901	12	110848873	110841084	HERVH
3914	12	127638213	127641033	HERVH
3941	13	35372231	35376157	HERVH
3946	13	38549729	38540117	HERVH
3951	13	43447294	43439217	HERVH
3959	13	51743852	51752598	HERVH
3963	13	54842717	54855481	HERVH
3971	13	56614385	56621324	HERVH
3976	13	61662572	61669622	HERVH
3987	13	66721178	66711941	HERVH
3986	13	66806493	66799487	HERVH
4012	13	82440406	82449060	HERVH
4017	13	84487932	84480846	HERVH
4021	13	87010410	87018020	HERVH
4029	13	89170998	89161995	HERVH
4038	13	91506532	91499058	HERVH
4045	13	98294572	98301766	HERVH
4067	14	21168984	21175833	HERVH
4071	14	21285364	21275783	HERVH
4090	14	25900995	25887644	HERVH
4098	14	31720595	31709763	HERVH
4104	14	35119515	35124406	HERVH
4121	14	41985074	41991606	HERVH
4133	14	45970397	45961179	HERVH
4137	14	47013209	47021299	HERVH
4139	14	47573644	47579925	HERVH
4147	14	51360075	51367752	HERVH
4164	14	59910630	59919732	HERVH
4181	14	71590924	71597757	HERVH
4183	14	73601547	73593353	HERVH
4184	14	74169589	74182870	HERVH
4185	14	76053991	76044307	HERVH
4194	14	84972330	84965589	HERVH
4197	14	86203428	86196674	HERVH
4216	14	93225963	93232826	HERVH
4217	14	94034000	94025751	HERVH
4219	14	98919397	98906555	HERVH
4251	15	37534770	37529601	HERVH
4274	15	53029932	53039624	HERVH
4291	15	74646485	74653965	HERVH
4306	15	88373055	88384073	HERVH
4312	15	90676200	90682613	HERVH
4321	15	97421430	97411776	HERVH
4329	15	101612986	101619522	HERVH
4336	16	8930335	8926884	HERVH
4337	16	9770899	9762748	HERVH
4338	16	10375037	10387659	HERVH
4342	16	13451669	13445495	HERVH
4346	16	19008632	19002123	HERVH
4401	16	63020153	63011687	HERVH
4403	16	65270483	65261037	HERVH
4417	16	86312898	86314868	HERVH
4419	16	86781261	86772935	HERVH
4420	17	6641793	6630602	HERVH
4426	17	11875061	11881419	HERVH
4428	17	19799365	19782988	HERVH
4442	17	32510526	32519699	HERVH
4473	17	52487758	52494345	HERVH
4475	17	53545255	53553883	HERVH
4504	18	9427511	9424028	HERVH
4519	18	20863921	20868842	HERVH
4523	18	25794497	25788116	HERVH
4525	18	26278845	26271905	HERVH
4534	18	29578738	29585016	HERVH
4539	18	32941751	32933516	HERVH
4547	18	40317050	40323730	HERVH
4548	18	40571572	40579422	HERVH
4596	19	6572642	6577900	HERVH
4607	19	9650083	9661231	HERVH
4610	19	9752357	9745339	HERVH
4613	19	9852438	9862424	HERVH
4630	19	17703572	17713925	HERVH
4650	19	21314980	21311861	HERVH
4664	19	22040977	22050193	HERVH
4674	19	23214557	23207910	HERVH
4678	19	23523157	23536740	HERVH
4699	19	28928145	28918699	HERVH
4713	19	36651925	36640614	HERVH
4714	19	36756137	36746658	HERVH
4719	19	39242521	39257182	HERVH
4731	19	42957458	42950299	HERVH
4736	19	43833545	43825236	HERVH
4744	19	47558655	47550656	HERVH
4767	19	53131161	53139417	HERVH
4779	19	54334658	54348338	HERVH
4785	19	55633617	55639372	HERVH
4803	20	877767	883791	HERVH
4812	20	12326779	12318669	HERVH
4813	20	12734787	12745074	HERVH
4815	20	13338527	13346205	HERVH
4839	20	38897687	38904455	HERVH
4843	20	43298870	43307846	HERVH
4846	20	44217224	44211312	HERVH
4865	21	17770235	17764263	HERVH
4868	21	18493914	18502262	HERVH
4895	21	38964614	38956013	HERVH
6262	22	17092202	17097672	HERVH
6277	22	32898694	32906968	HERVH
6283	22	39462275	39448283	HERVH
6245	1	246806105	246798029	HERVH48
668	2	124419689	124416097	HERVH48
699	2	143694860	143686613	HERVH48
2581	7	102611035	102623583	HERVH48
5327	X	28527432	28518567	HERVH48
5498	X	75189234	75181300	HERVH48
5688	X	122264930	122269552	HERVH48
5736	X	142120207	142115984	HERVH48
4561	18	49223020	49236390	HERVH48
493	2	26520789	26529269	HERVI
5363	X	49164436	49172977	HERVI
5093	Y	14432433	14441852	HERVI
5110	Y	15547047	15555136	HERVI
5164	Y	20581936	20592987	HERVI
4352	16	20685555	20693317	HERVI
4658	19	21785773	21795244	HERVI
5818	1	12772801	12764131	HERVIP
6025	1	117285920	117294692	HERVIP
6098	1	171188364	171193579	HERVIP
6109	1	173661191	173653099	HERVIP
6129	1	187599834	187608435	HERVIP
6228	1	235833561	235838850	HERVIP
629	2	100113230	100120798	HERVIP
676	2	128794155	128802029	HERVIP
858	3	5741467	5732690	HERVIP
867	3	14014884	14004499	HERVIP
1081	3	119757249	119764583	HERVIP
1084	3	120342443	120335693	HERVIP
1108	3	127611665	127618484	HERVIP
1281	3	196975692	196969871	HERVIP
1610	4	133739925	133733781	HERVIP
1894	5	82271811	82264927	HERVIP
2007	5	142474576	142468156	HERVIP
2012	5	146641236	146634356	HERVIP
2017	5	152096795	152110390	HERVIP
2063	6	4385285	4390682	HERVIP
2112	6	31305329	31296534	HERVIP
2124	6	35535600	35529634	HERVIP
2180	6	66884103	66871542	HERVIP
2306	6	118895219	118899454	HERVIP
2468	7	40187798	40181369	HERVIP
2477	7	43850262	43860956	HERVIP
2647	7	138135339	138124165	HERVIP
2812	8	50007259	50016992	HERVIP
2846	8	65677483	65689796	HERVIP
2847	8	66045383	66032458	HERVIP
3054	9	35462086	35455414	HERVIP
3097	9	90659717	90652007	HERVIP
3170	9	135912772	135906400	HERVIP
3173	9	136156606	136153270	HERVIP
5345	X	37337595	37344090	HERVIP
5352	X	44865870	44858531	HERVIP
5447	X	65152643	65147207	HERVIP
5747	X	145050338	145059769	HERVIP
5044	Y	7052218	7045820	HERVIP
5046	Y	7260367	7269084	HERVIP
5179	Y	21331592	21344445	HERVIP
3200	10	18859021	18866395	HERVIP
3308	10	85886072	85878324	HERVIP
3328	10	96758554	96751318	HERVIP
3387	11	4475699	4486006	HERVIP
3525	11	67461867	67452583	HERVIP
3595	11	92993941	93002353	HERVIP
3620	11	100621407	100615622	HERVIP
3632	11	106093259	106101234	HERVIP
3728	12	18325466	18331368	HERVIP
3822	12	63808545	63813153	HERVIP
4059	13	111618193	111624833	HERVIP
4062	14	20442186	20452832	HERVIP
4068	14	21194467	21183520	HERVIP
4097	14	31435055	31441754	HERVIP
4154	14	53648241	53642473	HERVIP
4215	14	93095953	93088762	HERVIP
4222	14	101781669	101790982	HERVIP
4258	15	41879752	41884933	HERVIP
4295	15	82672679	82664600	HERVIP
4526	18	26942547	26936450	HERVIP
4535	18	29561428	29550284	HERVIP
4611	19	9736928	9748758	HERVIP
4615	19	9820332	9833018	HERVIP
4735	19	43821479	43812520	HERVIP
4766	19	53152869	53156369	HERVIP
4841	20	40223225	40230969	HERVIP
4894	21	37476566	37482277	HERVIP
6261	22	16697554	16686417	HERVIP
5846	1	30268569	30274507	HERVL
5897	1	56194490	56203791	HERVL
5977	1	96113840	96110038	HERVL
5991	1	103733781	103738909	HERVL
6013	1	112675242	112666077	HERVL
6191	1	217479507	217489350	HERVL
6225	1	232336784	232331514	HERVL
463	2	4105971	4111973	HERVL
464	2	4538083	4531700	HERVL
589	2	80409531	80401045	HERVL
637	2	103530035	103523336	HERVL
639	2	105210447	105203964	HERVL
723	2	156784693	156777110	HERVL
735	2	165032955	165027694	HERVL
806	2	213303975	213309877	HERVL
824	2	223305888	223298468	HERVL
851	3	1030409	1022494	HERVL
859	3	6050257	6058846	HERVL
1066	3	112409146	112420424	HERVL
1158	3	147435529	147443585	HERVL
1287	4	3455650	3461455	HERVL
1386	4	43452626	43446329	HERVL
1396	4	46528535	46518578	HERVL
1420	4	63027233	63032741	HERVL
1437	4	66673433	66681393	HERVL
1518	4	95070656	95083336	HERVL
1557	4	108650857	108645411	HERVL
1592	4	127114819	127107346	HERVL
1606	4	133277068	133272477	HERVL
1672	4	161189136	161203659	HERVL
1756	5	10716252	10725049	HERVL
1763	5	15059583	15065586	HERVL
2006	5	140292410	140282059	HERVL
2090	6	19407149	19399710	HERVL
2192	6	69309359	69318137	HERVL
2193	6	69924098	69915903	HERVL
2201	6	72902900	72895529	HERVL
2321	6	122921804	122911620	HERVL
2352	6	141023430	141008441	HERVL
2368	6	145895089	145889033	HERVL
2375	6	152363578	152359037	HERVL
2495	7	53964117	53976969	HERVL
2593	7	108309720	108317205	HERVL
2596	7	109442993	109429544	HERVL
2745	8	17966820	17962228	HERVL
2764	8	36329333	36317027	HERVL
2864	8	79067914	79075170	HERVL
2865	8	79100112	79095735	HERVL
2895	8	90461032	90467472	HERVL
3027	9	26102943	26109671	HERVL
3136	9	108806209	108802020	HERVL
3175	9	137815940	137820616	HERVL
5428	X	62537487	62547669	HERVL
5438	X	63836657	63853323	HERVL
5450	X	65754017	65761924	HERVL
5472	X	72271044	72262826	HERVL
5542	X	82433952	82426633	HERVL
5588	X	93213009	93220512	HERVL
5028	Y	4141037	4156671	HERVL
3289	10	72781482	72774792	HERVL
3511	11	59982655	59992982	HERVL
3555	11	78837958	78849734	HERVL
3682	12	5929900	5935984	HERVL
3741	12	26930106	26935016	HERVL
3899	12	106003909	105998237	HERVL
4015	13	83549496	83544412	HERVL
4065	14	21037600	21045635	HERVL
4094	14	29641772	29645872	HERVL
4096	14	30510764	30523347	HERVL
4130	14	45137186	45147022	HERVL
4159	14	57798898	57795305	HERVL
4161	14	58188838	58197800	HERVL
4244	15	24251594	24240658	HERVL
4347	16	19292569	19283789	HERVL
4506	18	11130174	11134261	HERVL
1946	5	111915868	111921111	HERVL32
6207	1	226729437	226723909	HERVL66
4649	19	20963415	20952100	HERVL66
5951	1	86882363	86875033	HERVS
2268	6	99474335	99467178	HERVS
2998	9	7791624	7785527	HERVS
4036	13	91274382	91263448	HERVS
669	2	124444415	124447391	HERVT
1157	3	146129390	146124933	HERVT
1906	5	95049010	95041787	HERVT
2104	6	28744318	28732647	HERVT
5142	Y	18312287	18317768	HERVT
5143	Y	18496816	18491335	HERVT
3226	10	38225940	38233117	HERVT
3688	12	8477516	8472220	HERVT
4308	15	89083757	89087484	HERVT
4558	18	47926823	47935100	HERVT
4676	19	23369633	23360067	HERVT
4715	19	36823324	36814650	HERVT
5867	1	42410514	42419487	HERVW
5876	1	46856724	46846572	HERVW
5881	1	47418283	47431157	HERVW
5893	1	55384183	55372937	HERVW
5898	1	56254666	56247650	HERVW
6033	1	119713889	119707073	HERVW
6212	1	227818844	227806087	HERVW
485	2	17522319	17530945	HERVW
501	2	33882139	33890985	HERVW
536	2	53982456	53987292	HERVW
649	2	112799990	112797562	HERVW
698	2	143665484	143657813	HERVW
755	2	181096398	181104484	HERVW
879	3	19914970	19904552	HERVW
946	3	48374588	48369739	HERVW
1014	3	87993081	87976887	HERVW
1073	3	115460955	115476834	HERVW
1077	3	118561309	118570997	HERVW
1142	3	142157745	142161545	HERVW
1168	3	149479085	149469975	HERVW
1170	3	150574727	150580391	HERVW
1200	3	162041451	162048666	HERVW
1205	3	163416770	163409748	HERVW
1250	3	178772895	178780118	HERVW
1273	3	191379599	191385861	HERVW
1372	4	36446686	36433707	HERVW
1383	4	42292063	42283016	HERVW
1424	4	63836735	63842264	HERVW
1481	4	83394470	83404304	HERVW
1568	4	114968272	114977789	HERVW
1611	4	133806045	133808105	HERVW
1727	4	183920854	183927328	HERVW
1811	5	36332837	36326516	HERVW
1937	5	107916485	107910425	HERVW
2077	6	13881338	13887955	HERVW
2095	6	24680651	24667939	HERVW
2177	6	65717182	65724457	HERVW
2230	6	82046851	82061539	HERVW
2236	6	84156090	84159020	HERVW
2255	6	89129499	89114284	HERVW
2289	6	111452131	111463051	HERVW
2348	6	138046083	138038413	HERVW
2360	6	143407522	143398845	HERVW
2403	6	167307981	167313520	HERVW
2419	7	9056408	9065204	HERVW
2469	7	40212311	40199345	HERVW
2607	7	119206498	119211980	HERVW
2748	8	20015047	20023131	HERVW
2807	8	49155313	49145386	HERVW
2869	8	81651999	81656749	HERVW
3099	9	91558882	91548185	HERVW
5297	X	7620703	7615306	HERVW
5499	X	75122809	75113201	HERVW
5626	X	105241285	105253097	HERVW
5667	X	115876733	115867896	HERVW
5709	X	131067378	131059936	HERVW
5052	Y	7757554	7753628	HERVW
5178	Y	21244156	21250361	HERVW
3276	10	62799657	62790373	HERVW
3333	10	97482427	97479256	HERVW
3414	11	22337470	22333505	HERVW
3427	11	26023548	26028800	HERVW
3428	11	26619233	26612343	HERVW
3443	11	38623130	38633886	HERVW
3552	11	77574028	77567414	HERVW
3577	11	86548521	86545163	HERVW
3683	12	7331435	7341970	HERVW
3693	12	8918708	8916229	HERVW
3758	12	34252063	34255257	HERVW
3772	12	40780528	40788045	HERVW
3810	12	59253534	59243135	HERVW
3910	12	124033483	124043193	HERVW
3920	12	132365497	132352243	HERVW
3985	13	65283607	65276793	HERVW
4043	13	93691644	93697405	HERVW
4131	14	45491665	45488517	HERVW
4288	15	67266547	67257294	HERVW
4315	15	92842918	92849488	HERVW
4448	17	35687524	35692995	HERVW
4464	17	48483068	48475176	HERVW
4474	17	53096089	53085566	HERVW
4576	18	58377032	58380313	HERVW
4673	19	22930621	22941703	HERVW
4797	20	174757	171971	HERVW
4852	20	53963869	53969699	HERVW
4882	21	28226744	28234763	HERVW
6040	1	142914079	142910252	HML1
6164	1	205828432	205833357	HML1
6206	1	225988836	225978937	HML1
600	2	84703831	84695112	HML1
627	2	99894961	99887262	HML1
643	2	106608102	106611701	HML1
705	2	150175058	150179806	HML1
1112	3	128638139	128648074	HML1
1236	3	172436804	172448251	HML1
1385	4	43470832	43474847	HML1
1491	4	88328884	88318752	HML1
1782	5	24314559	24296964	HML1
1795	5	31399107	31390182	HML1
2219	6	79563832	79568868	HML1
2344	6	134926274	134919378	HML1
2640	7	135949183	135948065	HML1
2839	8	61406020	61412484	HML1
3037	9	29660161	29651710	HML1
3038	9	29780682	29775511	HML1
3104	9	93666186	93673961	HML1
5422	X	61978469	61972330	HML1
5446	X	64662276	64657591	HML1
5614	X	100444863	100434150	HML1
5675	X	117434570	117427040	HML1
5768	X	153817623	153822775	HML1
5767	X	153843906	153837384	HML1
5082	Y	13394309	13392020	HML1
5095	Y	14444022	14449205	HML1
5111	Y	15731633	15723000	HML1
5134	Y	17512195	17516976	HML1
3185	10	5078852	5080434	HML1
3292	10	73717452	73721038	HML1
3301	10	81864457	81875930	HML1
3375	10	135417088	135423313	HML1
3388	11	4519953	4516625	HML1
3495	11	56098345	56095479	HML1
3546	11	73658503	73650074	HML1
3790	12	48901209	48905474	HML1
3895	12	105703018	105696612	HML1
4286	15	62511235	62504325	HML1
4292	15	76555335	76562013	HML1
4366	16	31671319	31679807	HML1
4484	17	73019833	73024839	HML1
4640	19	20434008	20421932	HML1
4755	19	51906215	51900018	HML1
4795	19	58407886	58415225	HML1
6073	1	155669313	155661620	HML10
2101	6	27155290	27164062	HML10
2320	6	122835365	122826016	HML10
5104	Y	15113189	15105784	HML10
4349	16	19413451	19404934	HML10
4599	19	7866421	7856723	HML10
5820	1	12845378	12840274	HML2
5824	1	13458378	13467722	HML2
5826	1	13679214	13688558	HML2
5830	1	16435307	16429309	HML2
5843	1	25914499	25931290	HML2
5959	1	89554209	89553042	HML2
5972	1	94911062	94914412	HML2
6062	1	150608252	150600635	HML2
6069	1	155605494	155596465	HML2
6171	1	207814597	207805630	HML2
530	2	48611680	48617794	HML2
679	2	130727258	130719470	HML2
864	3	9896394	9883434	HML2
1045	3	101410958	101420097	HML2
1067	3	112752255	112743309	HML2
1102	3	125609343	125618118	HML2
1163	3	148285564	148269969	HML2
1260	3	185289375	185280349	HML2
1264	3	186583096	186592832	HML2
1284	4	233817	240110	HML2
1405	4	54121834	54102978	HML2
1685	4	165916842	165926213	HML2
1741	4	191034708	191027412	HML2
1793	5	30496057	30485216	HML2
2103	6	28651075	28660727	HML2
2214	6	78436056	78426847	HML2
2373	6	151177981	151184023	HML2
2410	7	4631501	4622242	HML2
2409	7	4639990	4630561	HML2
2582	7	104393267	104388995	HML2
2654	7	141455902	141452088	HML2
2704	8	7364785	7355397	HML2
2744	8	17774133	17764720	HML2
2976	8	140482803	140471350	HML2
3164	9	131612515	131619736	HML2
3177	9	139684238	139674766	HML2
5423	X	61959596	61967393	HML2
5449	X	65690352	65680814	HML2
5042	Y	6833832	6826072	HML2
5252	Y	26401299	26398760	HML2
5269	Y	27558956	27563678	HML2
3192	10	6875494	6866481	HML2
3340	10	101587714	101578459	HML2
3505	11	58764424	58773935	HML2
3512	11	60524029	60530538	HML2
3517	11	62150456	62143137	HML2
3625	11	101565821	101575074	HML2
3652	11	118600741	118591757	HML2
3762	12	34781752	34772559	HML2
3808	12	58730671	58721427	HML2
4086	14	24484991	24478749	HML2
4227	14	106140479	106141043	HML2
4370	16	34308939	34304828	HML2
4421	17	6784849	6778465	HML2
4422	17	7961703	7966506	HML2
4490	17	78525820	78510810	HML2
4621	19	12215107	12209141	HML2
4636	19	20387557	20397362	HML2
4655	19	21601613	21594933	HML2
4669	19	22758333	22766534	HML2
4695	19	28137359	28128022	HML2
4712	19	36066273	36063336	HML2
4768	19	53253078	53243799	HML2
4776	19	53862743	53868467	HML2
4833	20	32714748	32724381	HML2
6264	22	18926329	18935361	HML2
6272	22	23880503	23890570	HML2
6079	1	160660602	160669777	HML2,
2794	8	47183522	47175658	HML2,
2025	5	156093754	156084725	HML2.
5803	1	833838	831557	HML3
5884	1	48985928	48978917	HML3
5892	1	55096463	55105271	HML3
6039	1	142594601	142599484	HML3
6042	1	143491844	143489013	HML3
6061	1	150622928	150630261	HML3
6091	1	167292627	167287081	HML3
6119	1	178529163	178522963	HML3
6165	1	205859819	205874427	HML3
6185	1	213205790	213198869	HML3
6248	1	247187963	247193476	HML3
490	2	20122508	20129562	HML3
502	2	34144592	34139104	HML3
540	2	56946288	56951619	HML3
658	2	117010010	117015064	HML3
713	2	153036992	153032391	HML3
815	2	218978201	218979469	HML3
886	3	20660522	20657820	HML3
925	3	38463716	38466899	HML3
949	3	49265774	49272134	HML3
988	3	75857779	75853974	HML3
1048	3	102927819	102934665	HML3
1051	3	104005155	104002327	HML3
1090	3	121117505	121115113	HML3
1104	3	125812020	125820958	HML3
1175	3	151420232	151422892	HML3
1223	3	166901694	166894797	HML3
1242	3	174773582	174771189	HML3
1257	3	184822991	184828837	HML3
1316	4	10174618	10171638	HML3
1317	4	10304622	10300152	HML3
1368	4	35141695	35150702	HML3
1389	4	45044065	45051041	HML3
1463	4	74222862	74235989	HML3
1488	4	87383347	87386575	HML3
1500	4	92108458	92096705	HML3
1528	4	100111426	100092609	HML3
1531	4	100286942	100292414	HML3
1532	4	100413276	100406964	HML3
1538	4	102828009	102821121	HML3
1591	4	127052402	127058615	HML3
1602	4	131862211	131870880	HML3
1627	4	136881843	136876484	HML3
1641	4	142861993	142859323	HML3
1658	4	154615072	154611469	HML3
1716	4	175911525	175904068	HML3
1719	4	177265628	177269963	HML3
1742	5	242330	248034	HML3
1773	5	19700559	19709854	HML3
1806	5	34787036	34783817	HML3
1831	5	44788664	44794368	HML3
1832	5	44983898	44995096	HML3
1844	5	51600362	51606059	HML3
1849	5	53800312	53796038	HML3
1903	5	86806148	86816195	HML3
1948	5	113048701	113050165	HML3
1953	5	114376902	114373711	HML3
1964	5	121196630	121193174	HML3
2064	6	6068633	6065140	HML3
2113	6	31204335	31200691	HML3
2135	6	47283729	47275915	HML3
2196	6	71158225	71146359	HML3
2287	6	110820376	110827271	HML3
2288	6	111239076	111249330	HML3
2292	6	113588409	113584502	HML3
2399	6	165873144	165875719	HML3
2407	6	170905684	170903946	HML3
2472	7	42675154	42685514	HML3
2476	7	43906351	43892607	HML3
2480	7	46084750	46075341	HML3
2500	7	56213068	56216695	HML3
2501	7	56385141	56392953	HML3
2522	7	64406276	64411540	HML3
2566	7	94358621	94353547	HML3
2671	7	149348360	149337557	HML3
2676	7	151740374	151737104	HML3
2681	7	155034448	155031756	HML3
2756	8	30009373	30003522	HML3
2793	8	47189653	47196684	HML3
2800	8	47788354	47794313	HML3
2806	8	49163077	49157075	HML3
2809	8	49874848	49878995	HML3
2820	8	53896106	53893555	HML3
2863	8	75957072	75960409	HML3
2900	8	93248771	93254946	HML3
2953	8	127020746	127024399	HML3
2969	8	137924017	137922109	HML3
2981	8	146096936	146103212	HML3
3055	9	35582345	35587796	HML3
3110	9	96518095	96513346	HML3
3167	9	134555760	134562115	HML3
5409	X	57235570	57231267	HML3
5474	X	72545272	72533023	HML3
5508	X	76297517	76306499	HML3
5520	X	79296680	79301834	HML3
5593	X	94363538	94356566	HML3
5659	X	115167641	115172219	HML3
5070	Y	8988936	8982873	HML3
5073	Y	9075822	9080754	HML3
5107	Y	15364407	15371245	HML3
5146	Y	18792998	18790512	HML3
5148	Y	18984014	18989327	HML3
5166	Y	20725540	20719642	HML3
5172	Y	20918635	20924532	HML3
5186	Y	21830090	21819460	HML3
5220	Y	24118655	24107726	HML3
5229	Y	24763038	24772581	HML3
5244	Y	25724932	25715911	HML3
5277	Y	28175777	28171235	HML3
3232	10	42982099	42989974	HML3
3233	10	42990347	42995729	HML3
3234	10	43005029	43000132	HML3
3255	10	55100337	55097317	HML3
3279	10	65607972	65611341	HML3
3288	10	70628129	70620888	HML3
3365	10	120373798	120368323	HML3
3372	10	132090517	132094114	HML3
3508	11	59691401	59698868	HML3
3771	12	39594959	39584642	HML3
3786	12	47841799	47839065	HML3
3792	12	50892500	50885665	HML3
3880	12	94749360	94756649	HML3
3891	12	103060509	103054268	HML3
3927	13	20200200	20210047	HML3
3929	13	21259369	21252904	HML3
3931	13	23580608	23582921	HML3
3966	13	55493351	55485055	HML3
4123	14	42783120	42778216	HML3
4151	14	52631579	52639275	HML3
4160	14	57833871	57841045	HML3
4226	14	103701285	103708867	HML3
4246	15	25881721	25889049	HML3
4309	15	89783170	89775586	HML3
4332	16	3131319	3129069	HML3
4340	16	10518024	10513231	HML3
4365	16	31551548	31555671	HML3
4429	17	20983524	20975896	HML3
4437	17	28318276	28314676	HML3
4438	17	29958025	29964151	HML3
4463	17	47253565	47240414	HML3
4605	19	9564602	9573041	HML3
4612	19	9827460	9824141	HML3
4654	19	21528107	21517631	HML3
4679	19	23714872	23723122	HML3
4681	19	23762846	23753871	HML3
4739	19	45138637	45136461	HML3
4760	19	52811230	52803860	HML3
4809	20	5285342	5288519	HML3
4827	20	23448640	23456878	HML3
4855	21	9992233	9984931	HML3
4856	21	10140272	10144607	HML3
6087	1	161456522	161465168	HML4
6230	1	238080149	238084955	HML4
2984	8	146281055	146292082	HML4
3804	12	56892443	56886282	HML4
4663	19	22073203	22063430	HML4
5953	1	86967752	86974028	HML5
5965	1	91683160	91686881	HML5
6074	1	156157688	156149869	HML5
6078	1	158929178	158917345	HML5
6125	1	185565460	185547906	HML5
6205	1	225409471	225416973	HML5
6238	1	242376295	242381190	HML5
542	2	57212397	57209352	HML5
740	2	167465610	167471571	HML5
748	2	173377301	173384466	HML5
836	2	231966114	231955780	HML5
1210	3	163937914	163933872	HML5
1549	4	107031311	107036810	HML5
1619	4	134918736	134914417	HML5
1768	5	18786431	18783876	HML5
2121	6	33015760	33026982	HML5
2140	6	49860232	49855419	HML5
2152	6	56934085	56945794	HML5
2175	6	65008154	65012286	HML5
2216	6	78842190	78850428	HML5
2249	6	87211082	87208663	HML5
2463	7	38199852	38202344	HML5
2590	7	107024313	107031482	HML5
2689	8	5659474	5653209	HML5
2690	8	5714962	5710041	HML5
2727	8	9657357	9671658	HML5
2726	8	9658781	9660844	HML5
2832	8	58369148	58374915	HML5
2890	8	89623733	89620298	HML5
3003	9	11261878	11253556	HML5
3126	9	103130000	103125405	HML5
5439	X	64009354	64000965	HML5
5511	X	77472774	77470161	HML5
5590	X	93744390	93753445	HML5
5759	X	148763072	148757729	HML5
5049	Y	7495812	7489201	HML5
5056	Y	8071459	8055222	HML5
5124	Y	16985199	16971040	HML5
5191	Y	22120099	22125909	HML5
5205	Y	23253802	23249036	HML5
5214	Y	23811945	23820229	HML5
5231	Y	24849485	24856096	HML5
5242	Y	25638999	25632388	HML5
5280	Y	28323903	28330514	HML5
3606	11	95667618	95677024	HML5
3618	11	98803242	98799168	HML5
3690	12	8714880	8709362	HML5
3776	12	42834601	42845313	HML5
3777	12	44373543	44371210	HML5
3866	12	88577595	88567012	HML5
3882	12	95841942	95836392	HML5
3912	12	126516792	126517360	HML5
3935	13	25501530	25505137	HML5
3998	13	71605439	71601927	HML5
4054	13	103324776	103321630	HML5
4125	14	43271797	43277259	HML5
4129	14	44884991	44888412	HML5
4190	14	80930753	80939302	HML5
4254	15	39302823	39307975	HML5
4268	15	50123390	50135796	HML5
4278	15	55180308	55186093	HML5
4367	16	31780836	31774538	HML5
4378	16	35032070	35038894	HML5
4564	18	52274748	52271482	HML5
4657	19	21803039	21814210	HML5
4680	19	23735050	23742329	HML5
4685	19	24071507	24066076	HML5
4696	19	28236555	28242272	HML5
4800	20	453546	449277	HML5
5988	1	103298924	103306681	HML6
6120	1	179412388	179406704	HML6
674	2	128376484	128374000	HML6
691	2	136836895	136829390	HML6
943	3	46468168	46475055	HML6
1446	4	69616309	69610728	HML6
1454	4	71422130	71401997	HML6
1785	5	24649797	24654517	HML6
1875	5	69960618	69952729	HML6
2118	6	32449121	32439618	HML6
2675	7	150280229	150307070	HML6
2795	8	47405764	47392690	HML6
5387	X	53191400	53189251	HML6
5481	X	73388084	73402825	HML6
5723	X	140292742	140287080	HML6
5155	Y	19443743	19452813	HML6
5160	Y	20055491	20051431	HML6
5159	Y	20074247	20078307	HML6
5246	Y	25972612	25965364	HML6
5249	Y	26168212	26162647	HML6
5251	Y	26263155	26267730	HML6
5250	Y	26282257	26277682	HML6
5270	Y	27680176	27684749	HML6
5271	Y	27699274	27694701	HML6
5272	Y	27794219	27799784	HML6
5274	Y	27989775	27997023	HML6
3238	10	43796372	43788582	HML6
3353	10	110488980	110492726	HML6
3400	11	7927596	7919653	HML6
3514	11	61825189	61814936	HML6
3516	11	62020183	62031823	HML6
3646	11	112800806	112790259	HML6
3902	12	112263450	112254042	HML6
4093	14	28879914	28890435	HML6
4174	14	70275869	70286421	HML6
4362	16	30635509	30627098	HML6
4457	17	41949635	41953720	HML6
4481	17	72579454	72592107	HML6
4606	19	9625730	9618805	HML6
4653	19	21417047	21420559	HML6
4662	19	21977609	21966551	HML6
4665	19	22376085	22385626	HML6
4758	19	52480208	52495481	HML6
4763	19	52917986	52911334	HML6
4761	19	52988738	52975714	HML6
4771	19	53492716	53488197	HML6
4796	19	58817095	58826482	HML6
4804	20	1377582	1387888	HML6
1025	3	94366751	94373634	HML7
1561	4	110782108	110777133	HML7
1951	5	113484066	113474835	HML7
2139	6	49478291	49469836	HML7
3456	11	43193957	43182209	HML7
5852	1	33529280	33536780	HML8
6080	1	160660433	160657411	HML8
631	2	100985519	100979405	HML8
1429	4	65011195	65007974	HML8
1465	4	74818486	74815343	HML8
2157	6	58719113	58730209	HML8
2160	6	61962521	61956656	HML8
2489	7	50637492	50651587	HML8
5356	X	46349929	46338089	HML8
5404	X	56964527	56975831	HML8
5465	X	70916672	70923046	HML8
5466	X	71004602	70998229	HML8
5054	Y	7863753	7860993	HML8
5117	Y	16493756	16484001	HML8
3344	10	104604224	104595757	HML8
3471	11	50393335	50408077	HML8
3473	11	50452783	50445246	HML8
3524	11	67469242	67472765	HML8
3898	12	105703025	105707153	HML8
4432	17	26019659	26029980	HML8
4683	19	24039948	24030091	HML8
4688	19	24426051	24434499	HML8
4694	19	28071433	28079436	HML8
4697	19	28202681	28200266	HML8
5836	1	20259203	20253370	HML9
1698	4	171056038	171044938	HML9
2674	7	150262935	150258693	HML9
2787	8	43741865	43737413	HML9
2866	8	79556996	79566326	HML9
2986	8	146254332	146257548	HML9
5068	Y	8862301	8872294	HML9
5075	Y	9115292	9103033	HML9
5168	Y	20828542	20839759	HML9
5209	Y	23614258	23604172	HML9
5213	Y	23742208	23750242	HML9
5215	Y	23995928	23984738	HML9
750	2	175066980	175081143	HUERSP2
1615	4	134505609	134513813	HUERSP2
2184	6	68242443	68229765	HUERSP2
3142	9	111554874	111563061	HUERSP2
3300	10	81367769	81364525	HUERSP2
3637	11	108071137	108074160	HUERSP2
3775	12	42697914	42683031	HUERSP2
3781	12	44871638	44878339	HUERSP2
3820	12	63712689	63704115	HUERSP2
3894	12	105217852	105222442	HUERSP2
3992	13	69125611	69133347	HUERSP2
4531	18	28213482	28205148	HUERSP2
6086	1	161456150	161450547	HUERSP3
6244	1	246690806	246698574	HUERSP3
466	2	6987014	6978473	HUERSP3
565	2	70026487	70016604	HUERSP3
766	2	188044748	188034022	HUERSP3
797	2	209258651	209250813	HUERSP3
990	3	77968647	77972514	HUERSP3
1280	3	196246902	196252365	HUERSP3
1435	4	65585187	65577658	HUERSP3
1675	4	162179002	162173057	HUERSP3
1678	4	164095215	164101511	HUERSP3
1680	4	164116555	164108287	HUERSP3
1774	5	20336982	20347977	HUERSP3
1942	5	111262398	111256392	HUERSP3
2094	6	23116732	23108265	HUERSP3
2122	6	33092789	33085510	HUERSP3
2525	7	64868198	64887101	HUERSP3
2886	8	88067916	88056612	HUERSP3
5337	X	34106067	34112332	HUERSP3
5348	X	40665740	40652899	HUERSP3
5558	X	85066995	85074974	HUERSP3
5594	X	94334860	94326930	HUERSP3
5101	Y	15003420	15010375	HUERSP3
5170	Y	20871308	20859705	HUERSP3
5184	Y	21813749	21809392	HUERSP3
5194	Y	22702985	22709522	HUERSP3
3319	10	91894906	91904844	HUERSP3
3409	11	17391727	17400840	HUERSP3
3468	11	49765021	49756637	HUERSP3
3470	11	50016017	50022945	HUERSP3
3547	11	74580479	74595532	HUERSP3
3584	11	88619036	88627635	HUERSP3
3615	11	97844584	97834172	HUERSP3
3648	11	114458912	114466598	HUERSP3
3750	12	30997080	31005021	HUERSP3
4357	16	29720443	29730830	HUERSP3
4541	18	33452635	33460611	HUERSP3
6035	1	120032180	120026383	LTR19
1080	3	119696917	119709156	LTR19
5523	X	79567620	79573494	LTR19
4074	14	21471460	21479671	LTR19
786	2	196997757	196988487	LTR25
2482	7	46511133	46501104	LTR25
5524	X	79688681	79679195	LTR25
4126	14	43470888	43478536	LTR25
871	3	15145398	15161502	LTR26
2319	6	122300255	122317723	LTR27
2878	8	85556392	85549682	LTR38
6116	1	176295473	176277482	LTR39
5839	1	20361046	20356226	LTR46
5489	X	74430464	74425457	LTR46
4146	14	51011690	51021621	LTR57
4711	19	35850814	35863970	MER1
4754	19	51811468	51806211	MER21
5812	1	5143181	5128493	MER31
5891	1	53900615	53915502	MER34
2836	8	60690603	60701040	MER34
5353	X	45072311	45061633	MER34
5358	X	47566497	47559865	MER34
550	2	62327632	62315845	MER4
1041	3	100170423	100161269	MER4
1550	4	107824482	107806064	MER4
1598	4	131496307	131488560	MER4
2162	6	62077514	62062192	MER4
3306	10	84980520	84978224	MER4
4099	14	31741013	31750035	MER4
3314	10	87365768	87354940	MER4?
6081	1	160686712	160695720	MER41
500	2	33280439	33277063	MER41
1091	3	121334788	121321939	MER41
2649	7	138685988	138691777	MER41
3561	11	81345269	81351948	MER41
5573	X	89536240	89528939	MER50
5605	X	98110572	98120188	MER50
5024	Y	3728123	3718311	MER50
4884	21	29099953	29094154	MER50
5896	1	55421231	55429594	MER51
901	3	27086008	27079181	MER51
2939	8	115908007	115915295	MER51
5535	X	81626571	81619559	MER51
4138	14	47058337	47050513	MER51
4807	20	4501146	4510015	MER52
4869	21	18545054	18562730	MER52
792	2	207132330	207118566	MER54
6097	1	171202612	171194090	MER57
478	2	14061868	14069317	MER57
781	2	194951923	194961409	MER57
1286	4	3058297	3048064	MER57
1537	4	102590248	102599514	MER57
1579	4	118518569	118511116	MER57
2378	6	153739982	153725648	MER57
2458	7	33214219	33198442	MER57
2626	7	125098504	125091525	MER57
5550	X	83964715	83950550	MER57
3506	11	59168007	59177706	MER57
3605	11	95348758	95342832	MER57
3806	12	58051189	58061054	MER57
4511	18	13700698	13707820	MER57
1555	4	108518467	108505853	MER61
2228	6	81774458	81767941	MER61
3956	13	49190684	49200018	MER61
4536	18	31146907	31140587	MER61
5947	1	84659231	84651540	MER65
2049	5	175433070	175418933	MER65
2051	5	177264736	177278868	MER65
6056	1	149272975	149259488	MER66
6057	1	149658693	149645108	MER66
1398	4	46861723	46869673	MER66
2589	7	106749271	106733939	MER66
3004	9	12176163	12166461	MER66
5711	X	134192866	134203280	MER66
5103	Y	15065277	15076075	MER66
3338	10	101057954	101063337	MER66
3351	10	109885153	109870808	MER66
3395	11	6776138	6768523	MER66
4842	20	40313563	40324461	MER66
4851	20	53653348	53643812	MER66
6279	22	34900716	34906773	MER66
5380	X	52222266	52210602	MER68
5382	X	52495262	52482878	MER68
2841	8	64066918	64056264	MER72
2382	6	158590392	158577824	MER74
1881	5	75293832	75278363	MER76
1359	4	32324529	32330391	MER83
1508	4	92699209	92689704	MER83
846	2	241797522	241807089	MER84
934	3	44382370	44371220	MER84
5426	X	62492446	62502532	MER84
3405	11	13493453	13496332	MER84
3833	12	70535808	70531168	MER84
1069	3	113248531	113240604	MER89
5922	1	73009375	73002503	MLT
845	2	240969231	240985371	MLT
1290	4	4007440	4000879	MLT
1390	4	45333852	45322103	MLT
2030	5	159543071	159558145	MLT
2692	8	6782403	6793851	MLT
2749	8	23273621	23279631	MLT
5727	X	141265183	141252321	MLT
3313	10	87164767	87152962	MLT
3458	11	43208657	43200648	MLT
3587	11	89580797	89591308	MLT
5833	1	19593770	19610003	MST
487	2	19194863	19214958	MST
1580	4	118867785	118848493	MST
1696	4	168949792	168940335	MST
2598	7	112281340	112296899	MST
3835	12	70843890	70835971	MST
4780	19	55290101	55273064	MST
6034	1	119974268	119966027	PRIMA4
5518	X	79084245	79069164	PRIMA4
5546	X	83256697	83270780	PRIMA4
5611	X	100045206	100054619	PRIMA4
3213	10	27288181	27277046	PRIMA4
3643	11	110287949	110298460	PRIMA4
4589	18	77783869	77793162	PRIMA4
5871	1	44515942	44527819	PRIMA41
6209	1	227689296	227693276	PRIMA41
626	2	99369304	99378468	PRIMA41
1269	3	190712351	190705126	PRIMA41
1718	4	176372985	176365399	PRIMA41
1740	4	190911481	190900973	PRIMA41
1924	5	101686564	101670585	PRIMA41
2441	7	23125870	23112827	PRIMA41
2471	7	41599260	41586605	PRIMA41
5340	X	35010439	34996654	PRIMA41
5665	X	115415803	115424887	PRIMA41
5669	X	116213374	116202586	PRIMA41
3294	10	76535406	76544894	PRIMA41
3461	11	48361605	48354955	PRIMA41
4193	14	83515390	83524645	PRIMA41
4243	15	24279460	24283502	PRIMA41
4454	17	41435350	41430155	PRIMA41
5344	X	37324662	37332666	PRIMLTR79
927	3	39385206	39394984	RHERVI
1047	3	102776388	102767103	RHERVI
2487	7	50110618	50102762	RHERVI
5717	X	136018813	136005585	RHERVI
3704	12	10512960	10522913	RHERVI
4668	19	22672679	22667397	RHERVI
6011	1	111570512	111580009	THE
606	2	89176379	89189672	THE
1002	3	83332797	83319277	THE
1406	4	54349197	54360381	THE
1870	5	68931983	68951138	THE
1872	5	69525902	69504266	THE
1874	5	69808287	69827411	THE
1876	5	70525426	70504867	THE
3033	9	27779117	27795566	THE
3058	9	42461301	42455124	THE
5728	X	141278368	141268420	THE
3434	11	32166710	32174925	THE
3439	11	37604529	37598376	THE
3490	11	55242702	55226347	THE
3826	12	66684611	66675277	THE
4095	14	29728816	29720749	THE
4231	14	107097575	107084212	THE
4734	19	43790293	43805413	THE
4861	21	15262079	15272800	THE
5807	1	3723372	3718295		HML4
5811	1	5104895	5112937		HERVH
5829	1	13886269	13894115		HERVH
5835	1	19868043	19874105		HML3
5837	1	20322354	20330192		HML3
5838	1	20372187	20367966		HERVH
5840	1	20480439	20486859		HERVE
5841	1	21716322	21728634		HUERSP1
5842	1	23330855	23324192		HERVH
5847	1	30676525	30680715		HERVH
5848	1	31930796	31940153		HERVIP
5860	1	36795639	36802864		HERVFB
5861	1	38373537	38379766		HERVH
5862	1	38610067	38616594		HERVL
5863	1	38890771	38896455		HERVH
5872	1	45782106	45786954		HERVH
5874	1	46228185	46219194		HERVIP
5878	1	47368228	47373595		HML8
5882	1	48680493	48674628		HERVH
5889	1	52691416	52682773		HERVIP
5903	1	62649464	62644136		HML1
5906	1	64652290	64658453		HERVS
5907	1	64821897	64815151		HERVH
5919	1	71054169	71059686		HERVH
5921	1	71967843	71976550		HERVADP
5929	1	75211101	75205857		HERV9
5931	1	75842927	75853182		HML2
5934	1	77366091	77360479		HERVH
5937	1	79337872	79346600		HERVH
5938	1	79959554	79954306		HERVH
5940	1	80167752	80162032		HERVH
5943	1	81710968	81717130		HERVH
5945	1	82826239	82819994		HERVH
5946	1	83420988	83427264		HERVH
5955	1	89063599	89068655		HERVL
5957	1	89392889	89396478		HERVW
5961	1	89803390	89811535		MER52
5973	1	94844269	94837303		HERV9
5975	1	95038245	95032041		HERVH
5980	1	99272433	99265618		HERVH
5981	1	99975067	99980925		HERVH
5985	1	102068959	102062968		HERVH
5986	1	102558444	102551691		HERVIP
5996	1	104922745	104931261		HERVH
6007	1	110245237	110253270		HML8
6009	1	110404061	110395908		HERVW
6015	1	113351443	113357979		HERVH
6024	1	116057994	116051756		HERVH
6026	1	117405203	117410181		HERVH
6028	1	118364485	118357995		HERVS
6029	1	118768282	118775746		HERV9
6032	1	119716662	119720262		HERV9
6067	1	154020558	154026387		HML3
6068	1	154643951	154650412		HERV9
6072	1	155629422	155620079		HERV4
6076	1	157433157	157426737		HERVL
6083	1	161220117	161227502		HERV9
6085	1	161442721	161450082		HERV9
6089	1	166580258	166574603		HML2
6094	1	169630866	169640129		HERV9
6099	1	171274185	171282044		HERV9
6106	1	173337134	173345110		HERV9
6108	1	173606363	173612171		HERVIP
6115	1	175238535	175246697		PRIMA41
6118	1	178009498	178015060		HERVH
6122	1	181215333	181224478		HML8
6126	1	185923348	185916758		HERVH
6127	1	186481618	186492884		HEPSI3
6135	1	188310974	188304164		HERVL
6139	1	188633188	188641740		HERVFRD
6143	1	191203288	191209860		HERVL
6144	1	193352685	193344207		HERVL
6145	1	194392867	194396404		HERV9
6148	1	195701316	195707916		MER50
6166	1	205859560	205853681		HERVH
6176	1	210289552	210284434		HERVH
6177	1	210360949	210369023		HERVH
6182	1	212031567	212029481		HERVW
6183	1	212596402	212601957		HERV9
6187	1	215589043	215583156		HERVH
6188	1	216181471	216187452		HERVH
6189	1	216318399	216323757		HERVH
6192	1	218773191	218768352		HERVH
6193	1	218928613	218922299		HERVE
6196	1	222139307	222144960		HERVH
6203	1	225033784	225027630		HERVH
6202	1	225073389	225081246		HERVH
6208	1	227021401	227026126		HERVH
6214	1	228818396	228811875		HERVH
6215	1	229083310	229087638		HERVH
6217	1	229309718	229315920		HERVH
6219	1	229960073	229968999		HEPSI3
6221	1	230736962	230744760		HERVH
6224	1	232370545	232365352		HERVH
6234	1	241597180	241603186		HERVH
6239	1	242620271	242622875		HML7
6249	1	247270118	247274860		HML9
6251	1	247449564	247455233		HERVH48
6254	1	247873452	247867764		HERVL
6259	1	248504293	248499071		HERVH
460	2	160785	153015		HERVW
467	2	8019022	8012835		HERVH
470	2	12710023	12714469		HERVH
471	2	12766418	12771150		HERVH
472	2	13309849	13303883		HERVH
486	2	18269605	18262355		HERVADP
496	2	31920319	31912698		HUERSP3
506	2	35014886	35021981		HERVH
505	2	35031792	35026065		HERVH
513	2	38313654	38307942		HERVH
519	2	41604973	41612853		HERVH
521	2	41720460	41729640		HUERSP3
525	2	45267287	45261181		HERVH
526	2	47327335	47335597		HERV9
528	2	47818785	47810125		HERVH
534	2	52254812	52250241		HERVH
535	2	52658077	52665007		HERVE
[truncated: 1,175 more rows]
