# Supplementary material for: Investigation of somatic single nucleotide variations in human endogenous retrovirus elements and their potential association with cancer
Source: PLoS One. 2019 Apr 1;14(4):e0213770. doi: 10.1371/journal.pone.0213770 (PMC6443178; doi:10.1371/journal.pone.0213770)
Supplement: S2 Table — (XLSX) [file pone.0213770.s004.xlsx]

## Sheet: Sheet1
Tax-order	HERV clade	Number of HERV sequences*		Repbase identifiers**
		Canonical	Non-canonical
	Gammaretrovirus/Epsilonretrovirus-related (GE)
10100	Supergroup MLLV*
10110	HERVT	21	12	HERVS71/LTR6
10200	Supergroup HERVERI
10210	HERVE	41	107	HERVE/LTR2
10230	HERV3	20	37	HERV3/LTR4
10240	HERV1	2	11	HERV1
10250	HERVI	3	13	HERVI/LTR10
10300	Supergroup HERVW9
10310	HERVW	40	86	HERV17/LTR17
10320	HERV9	114	171	HERV9/LTR12
10400	Supergroup HERVIPADP
10410	HERVIP	67	72	HERVIP10F/LTR10F
10420	HERVADP	16	8	HERVP71A_1/LTR71
10600	Supergroup HERVHF
10610	HERVH	531	500	HERVH/LTR7
10620	HERVH48	16	8	HERVH48I/MER48
10630	HERVFA	8	7	HERVFH19/LTR19
10640	HERVFB	8	14	HERVFH21/LTR21A
10650	HERVFC	2	3	HERV46I/LTR46
10660	LTR46	8	2	LTR46-in/LTR46
10700	Supergroup HERVFRDlike
10710	HERVFRD	1	10	ERV3-1-i/LTR58, MER50
10720	PRIMA41	3	17	PRIMA41/MER41
10740	HERV1_artiodact	2	7	NA
10750	PABL	2	8	PABL_BI/PABL_A, PABL_B
10760	HERV4	8	23	NA
10800	Supergroup HEPSI
10820	HEPSI2	2	4	NA
10830	HEPSI3	1	5	NA
10852	MER65	1	1	MER65/MER65C
10882	PRIMA4	3	4	PRIMA4
10900	Supergroup HUERSP
10910	HUERSP1	1	3	HUERSP1/LTR8
10920	HUERSP2	10	12	HUERSP2/LTR1_LTR28
10930	HUERSP3	16	40	HUERSP3/LTR9
	Alpharetrovirus/Betaretrovirus-related (AB)
	Supergroup HML
20010	HML1	9	45	HERVK14I/LTR14
20020	HML2	19	70	HERVK/LTR5
20030	HML3	31	151	HERVK9I/MER9
20040	HML4	7	5	HERVK13I/LTR13
20050	HML5	27	69	HERVK22/LTR22
20060	HML6	17	48	HERVK31/LTR3
20070	HML7	9	5	HERVK11DI/MER11D
20080	HML8	34	24	HERVK11I/MER11A
20090	HML9	10	9	HERVK(14C)/LTR14C
20100	HML10	2	7	HERVKC4/LTR14
	Spumavirus-related (S)
	Supergroup HSERVIII
30100	HERVL	86	75	HERVL (HERVL/MLT2)
30200	HERVS	16	4	HERVS (HERV18/LTR18)
Please note that HERV minor subgroups in figure 3 listed below and see more detail in Vagiu et al.:
HERV Clade	Supergroup	Group
Gammaretrovirus/Epsilonretrovirus-related (GE)	HUERSP	MER52
Gammaretrovirus/Epsilonretrovirus-related (GE)	HERVERI	HARLEQUIN
Spumavirus-related (S)	MaLR	THE
*Vargiu et al. Classification and characterization of human endogenous retroviruses; mosaic forms are common [PMID: 26800882]
**Bannert and Kurth The evolutionary dynamics of human endogenous retroviral families. [PMID: 16722807] and Mager and Medstrand [doi: 10.1038/npg.els.0005062]
