# Supplementary material for: Investigation of somatic single nucleotide variations in human endogenous retrovirus elements and their potential association with cancer
Source: PLoS One. 2019 Apr 1;14(4):e0213770. doi: 10.1371/journal.pone.0213770 (PMC6443178; doi:10.1371/journal.pone.0213770)
Supplement: S3 Table — (XLSX) [file pone.0213770.s005.xlsx]

## Sheet: Total
			Chromosome	Ratio
			1	0.0178137
			2	0.0188532
			3	0.0194908
			4	0.0193378
			5	0.0207662
			6	0.0171572
			7	0.0201472
			8	0.0219331
			9	0.0159609
			10	0.0174485
			11	0.0196588
			12	0.0182705
			13	0.0189696
			14	0.017641
			15	0.0157107
			16	0.0180697
			17	0.0156095
			18	0.019461
			19	0.0194816
			20	0.0186224
			21	0.0209054
			22	0.0153459
			x	0.013
			y	0.00648611
			Sum	0.426141
			Average	0.0177559

## Sheet: chr1_output
Position	Total number of SNVs per 1000 bases	Ratio
254000	12	0.012		ps: positions are from chromoome 1
797000	21	0.021
861000	18	0.018
880000	27	0.027
932000	11	0.011
1710000	8	0.008
1753000	4	0.004
2024000	7	0.007
2357000	7	0.007
2475000	14	0.014
2702000	22	0.022
2847000	24	0.024
3049000	10	0.01
3311000	13	0.013
4486000	20	0.02
4503000	17	0.017
4738000	25	0.025
5156000	24	0.024
5245000	40	0.04
5434000	17	0.017
5468000	25	0.025
5774000	22	0.022
5935000	57	0.057
6365000	18	0.018
6448000	10	0.01
6722000	6	0.006
6747000	8	0.008
6880000	25	0.025
7372000	17	0.017
7673000	23	0.023
7733000	13	0.013
8044000	9	0.009
8172000	13	0.013
8198000	9	0.009
8528000	6	0.006
8712000	4	0.004
8968000	10	0.01
8991000	14	0.014
9040000	7	0.007
9137000	8	0.008
9422000	6	0.006
9495000	7	0.007
9497000	11	0.011
9598000	7	0.007
10160000	6	0.006
10168000	12	0.012
10462000	15	0.015
10475000	5	0.005
10503000	5	0.005
10629000	11	0.011
10729000	12	0.012
10767000	10	0.01
10820000	10	0.01
11391000	17	0.017
11417000	11	0.011
11677000	5	0.005
11786000	12	0.012
11963000	6	0.006
12323000	3	0.003
13008000	8	0.008
14271000	12	0.012
14335000	9	0.009
14694000	15	0.015
15279000	10	0.01
15546000	129	0.129
16204000	10	0.01
16401000	13	0.013
16515000	5	0.005
16549000	5	0.005
16869000	21	0.021
16944000	24	0.024
17195000	43	0.043
17468000	9	0.009
17490000	15	0.015
17553000	8	0.008
18736000	16	0.016
18983000	6	0.006
19325000	5	0.005
19511000	9	0.009
19815000	10	0.01
20053000	9	0.009
20566000	15	0.015
20791000	19	0.019
20805000	6	0.006
21043000	12	0.012
21186000	71	0.071
21456000	7	0.007
21923000	8	0.008
22215000	7	0.007
22218000	7	0.007
22323000	14	0.014
22337000	15	0.015
22493000	14	0.014
22624000	9	0.009
22898000	8	0.008
22926000	17	0.017
23069000	11	0.011
23549000	11	0.011
23728000	3	0.003
24009000	5	0.005
24062000	11	0.011
24131000	8	0.008
24412000	11	0.011
24522000	9	0.009
24600000	20	0.02
24680000	10	0.01
24775000	8	0.008
24848000	6	0.006
25148000	4	0.004
25396000	16	0.016
25424000	10	0.01
25592000	1	0.001
26108000	13	0.013
26289000	9	0.009
26444000	5	0.005
26510000	46	0.046
26554000	5	0.005
26587000	7	0.007
27189000	55	0.055
27227000	2	0.002
27621000	21	0.021
27870000	6	0.006
28190000	8	0.008
28570000	9	0.009
28779000	5	0.005
28810000	6	0.006
29400000	2	0.002
29510000	7	0.007
29639000	48	0.048
30045000	15	0.015
30107000	15	0.015
30186000	13	0.013
30416000	9	0.009
31193000	6	0.006
31917000	13	0.013
31965000	11	0.011
32231000	9	0.009
32491000	10	0.01
33147000	8	0.008
33729000	9	0.009
34137000	27	0.027
34308000	18	0.018
34583000	27	0.027
35227000	172	0.172
35463000	1	0.001
35513000	5	0.005
35589000	11	0.011
35883000	6	0.006
35986000	6	0.006
36194000	4	0.004
36200000	12	0.012
36237000	4	0.004
36319000	12	0.012
36460000	7	0.007
36594000	8	0.008
37110000	15	0.015
37463000	26	0.026
37629000	14	0.014
38146000	4	0.004
38887000	16	0.016
39318000	25	0.025
39468000	8	0.008
39479000	18	0.018
39559000	10	0.01
39738000	2	0.002
39843000	7	0.007
40308000	8	0.008
40476000	14	0.014
40775000	46	0.046
41038000	12	0.012
41686000	5	0.005
41747000	13	0.013
42103000	18	0.018
42137000	3	0.003
42166000	3	0.003
42306000	12	0.012
42380000	7	0.007
42428000	13	0.013
42747000	9	0.009
42921000	14	0.014
43027000	10	0.01
43199000	6	0.006
43216000	12	0.012
43353000	21	0.021
43488000	16	0.016
43530000	5	0.005
43769000	10	0.01
43961000	6	0.006
44067000	9	0.009
44254000	2	0.002
44325000	6	0.006
44455000	10	0.01
44507000	9	0.009
44646000	17	0.017
45100000	11	0.011
45332000	7	0.007
45339000	5	0.005
45375000	6	0.006
45507000	9	0.009
45557000	9	0.009
45653000	9	0.009
45749000	6	0.006
45991000	12	0.012
46021000	5	0.005
46106000	12	0.012
46135000	8	0.008
46208000	3	0.003
46226000	30	0.03
46472000	6	0.006
46495000	21	0.021
46550000	6	0.006
46619000	7	0.007
46832000	6	0.006
47902000	6	0.006
48345000	16	0.016
48503000	14	0.014
48623000	9	0.009
49042000	19	0.019
49050000	17	0.017
49344000	11	0.011
49542000	10	0.01
49783000	17	0.017
50347000	10	0.01
50467000	22	0.022
50571000	24	0.024
50884000	43	0.043
51284000	9	0.009
51573000	11	0.011
51616000	11	0.011
51661000	10	0.01
51990000	7	0.007
52541000	7	0.007
52754000	13	0.013
52978000	11	0.011
53321000	10	0.01
53428000	5	0.005
53583000	18	0.018
53772000	7	0.007
54172000	11	0.011
54353000	4	0.004
54491000	5	0.005
54959000	15	0.015
55086000	10	0.01
55199000	9	0.009
55467000	10	0.01
55960000	12	0.012
55979000	20	0.02
56224000	23	0.023
57201000	21	0.021
57309000	19	0.019
57315000	27	0.027
57413000	33	0.033
58204000	15	0.015
58770000	10	0.01
59133000	19	0.019
59477000	13	0.013
59483000	14	0.014
59492000	18	0.018
60479000	12	0.012
61000000	11	0.011
61092000	12	0.012
61349000	11	0.011
61562000	9	0.009
62401000	12	0.012
62535000	8	0.008
62828000	11	0.011
62873000	16	0.016
63039000	7	0.007
63064000	33	0.033
63494000	14	0.014
63997000	13	0.013
64169000	7	0.007
64551000	11	0.011
64730000	11	0.011
65214000	5	0.005
65324000	4	0.004
65569000	10	0.01
66073000	10	0.01
66112000	35	0.035
66171000	17	0.017
66532000	16	0.016
67269000	18	0.018
67435000	8	0.008
67447000	15	0.015
67594000	13	0.013
67680000	12	0.012
68053000	10	0.01
68311000	11	0.011
68738000	15	0.015
69335000	27	0.027
69879000	19	0.019
70248000	15	0.015
70666000	4	0.004
70988000	12	0.012
71034000	22	0.022
71267000	17	0.017
71996000	28	0.028
72256000	22	0.022
72285000	17	0.017
72421000	14	0.014
72465000	18	0.018
72732000	19	0.019
72873000	33	0.033
72933000	21	0.021
73054000	26	0.026
73564000	45	0.045
73664000	36	0.036
74433000	31	0.031
74543000	27	0.027
74674000	7	0.007
74680000	13	0.013
74815000	13	0.013
74834000	15	0.015
74878000	17	0.017
75064000	37	0.037
75159000	17	0.017
75406000	34	0.034
75728000	30	0.03
75864000	31	0.031
75906000	21	0.021
76198000	43	0.043
76207000	4	0.004
76226000	34	0.034
76541000	10	0.01
76568000	11	0.011
76666000	9	0.009
76946000	15	0.015
77243000	21	0.021
77530000	15	0.015
77630000	3	0.003
77986000	10	0.01
78578000	12	0.012
78596000	16	0.016
78684000	31	0.031
78727000	17	0.017
79019000	31	0.031
79062000	24	0.024
79129000	11	0.011
79254000	23	0.023
79489000	30	0.03
79867000	38	0.038
79889000	16	0.016
80147000	37	0.037
80836000	16	0.016
80929000	27	0.027
80943000	20	0.02
81171000	23	0.023
81283000	19	0.019
81548000	32	0.032
81978000	20	0.02
82054000	22	0.022
83149000	21	0.021
83978000	17	0.017
84016000	16	0.016
84268000	11	0.011
84446000	9	0.009
84585000	3	0.003
84999000	5	0.005
85825000	4	0.004
85868000	13	0.013
85977000	17	0.017
86004000	27	0.027
86182000	10	0.01
86274000	14	0.014
86965000	37	0.037
87228000	20	0.02
87288000	15	0.015
87360000	8	0.008
87750000	13	0.013
87931000	10	0.01
88145000	14	0.014
89300000	6	0.006
89348000	8	0.008
89561000	10	0.01
90009000	8	0.008
90028000	8	0.008
90371000	10	0.01
90401000	33	0.033
90526000	5	0.005
90606000	22	0.022
90783000	16	0.016
90815000	29	0.029
90906000	25	0.025
91160000	26	0.026
91219000	14	0.014
91601000	15	0.015
92227000	7	0.007
92396000	15	0.015
92733000	9	0.009
93163000	29	0.029
93373000	10	0.01
93657000	17	0.017
93675000	6	0.006
93759000	5	0.005
94175000	8	0.008
94200000	5	0.005
94525000	8	0.008
94785000	15	0.015
94876000	14	0.014
95058000	13	0.013
95191000	13	0.013
95263000	6	0.006
95431000	8	0.008
95833000	14	0.014
95849000	12	0.012
96273000	22	0.022
96292000	22	0.022
96652000	29	0.029
96860000	35	0.035
97178000	22	0.022
97895000	19	0.019
98180000	28	0.028
98253000	21	0.021
98494000	12	0.012
98497000	13	0.013
98638000	22	0.022
98676000	19	0.019
98899000	20	0.02
99169000	8	0.008
99424000	14	0.014
100184000	13	0.013
100270000	10	0.01
100975000	4	0.004
101012000	15	0.015
101529000	6	0.006
101887000	30	0.03
101999000	23	0.023
102212000	18	0.018
102238000	23	0.023
102266000	20	0.02
102341000	10	0.01
102523000	20	0.02
102539000	14	0.014
102690000	44	0.044
103051000	27	0.027
103290000	24	0.024
103329000	29	0.029
103359000	27	0.027
103710000	44	0.044
105156000	27	0.027
105568000	17	0.017
105582000	42	0.042
105864000	32	0.032
106158000	26	0.026
106288000	25	0.025
107110000	28	0.028
107186000	21	0.021
107588000	21	0.021
107825000	18	0.018
108457000	12	0.012
108509000	17	0.017
108624000	22	0.022
108876000	11	0.011
109184000	11	0.011
109449000	5	0.005
109767000	5	0.005
109816000	17	0.017
109897000	39	0.039
109956000	8	0.008
109963000	6	0.006
110187000	5	0.005
110296000	5	0.005
110480000	6	0.006
110585000	23	0.023
110743000	9	0.009
111005000	2	0.002
111197000	10	0.01
111378000	24	0.024
111458000	12	0.012
111710000	6	0.006
111748000	14	0.014
111901000	15	0.015
111977000	8	0.008
112025000	9	0.009
112393000	20	0.02
112572000	23	0.023
112609000	42	0.042
112702000	13	0.013
112796000	22	0.022
112988000	5	0.005
113391000	10	0.01
113456000	83	0.083
113731000	9	0.009
114156000	6	0.006
114221000	6	0.006
114398000	13	0.013
114601000	30	0.03
114747000	16	0.016
115448000	18	0.018
115454000	62	0.062
115516000	11	0.011
115831000	24	0.024
115862000	27	0.027
115944000	36	0.036
115979000	7	0.007
116116000	25	0.025
116206000	214	0.214
116423000	14	0.014
116923000	9	0.009
117034000	6	0.006
117358000	13	0.013
117378000	18	0.018
117636000	6	0.006
118065000	13	0.013
118098000	11	0.011
118341000	8	0.008
118931000	26	0.026
119180000	38	0.038
119626000	15	0.015
119887000	11	0.011
119995000	8	0.008
120356000	13	0.013
120462000	60	0.06
120510000	122	0.122
120685000	11	0.011
120905000	3	0.003
121196000	16	0.016
121216000	20	0.02
121325000	37	0.037
121345000	27	0.027
142641000	71	0.071
143943000	5	0.005
144047000	10	0.01
144543000	5	0.005
145320000	4	0.004
145410000	13	0.013
145515000	9	0.009
145521000	8	0.008
145559000	17	0.017
145778000	3	0.003
146469000	10	0.01
146902000	17	0.017
146920000	19	0.019
147170000	10	0.01
147305000	22	0.022
147363000	13	0.013
147539000	5	0.005
147955000	13	0.013
147988000	1	0.001
149453000	3	0.003
149664000	13	0.013
150772000	32	0.032
150897000	6	0.006
151073000	11	0.011
151398000	3	0.003
151660000	14	0.014
151787000	189	0.189
152126000	17	0.017
152348000	22	0.022
152350000	18	0.018
152384000	57	0.057
152679000	18	0.018
152719000	18	0.018
152816000	37	0.037
152920000	29	0.029
153004000	89	0.089
153577000	15	0.015
153593000	9	0.009
153597000	9	0.009
153689000	14	0.014
153744000	26	0.026
154032000	13	0.013
154850000	16	0.016
154900000	11	0.011
155105000	5	0.005
155190000	8	0.008
156245000	4	0.004
156465000	9	0.009
156620000	13	0.013
156659000	13	0.013
156668000	9	0.009
156675000	33	0.033
156679000	10	0.01
157000000	13	0.013
157130000	13	0.013
157254000	23	0.023
157403000	20	0.02
157454000	16	0.016
157803000	112	0.112
158036000	17	0.017
158098000	7	0.007
158130000	24	0.024
158773000	36	0.036
159122000	22	0.022
159171000	22	0.022
159729000	9	0.009
159901000	151	0.151
160522000	21	0.021
161986000	12	0.012
162091000	14	0.014
162114000	8	0.008
162387000	13	0.013
162681000	16	0.016
162768000	9	0.009
163204000	12	0.012
164109000	28	0.028
164169000	32	0.032
164218000	49	0.049
165032000	18	0.018
165052000	19	0.019
165113000	17	0.017
165713000	9	0.009
166040000	18	0.018
166096000	21	0.021
166345000	25	0.025
166618000	31	0.031
167241000	10	0.01
167308000	10	0.01
167371000	14	0.014
167468000	17	0.017
167561000	16	0.016
167621000	12	0.012
168183000	12	0.012
168188000	9	0.009
168334000	12	0.012
168738000	14	0.014
168927000	9	0.009
169029000	24	0.024
169245000	8	0.008
169491000	12	0.012
169707000	20	0.02
169883000	9	0.009
169956000	8	0.008
170211000	14	0.014
170491000	16	0.016
171931000	15	0.015
172422000	7	0.007
172536000	8	0.008
172753000	16	0.016
173199000	12	0.012
173237000	17	0.017
174782000	2	0.002
175066000	85	0.085
175499000	22	0.022
175904000	5	0.005
176536000	32	0.032
176814000	33	0.033
177237000	38	0.038
177483000	35	0.035
177485000	38	0.038
177798000	14	0.014
177908000	18	0.018
178126000	11	0.011
178638000	19	0.019
178910000	17	0.017
178952000	19	0.019
178997000	7	0.007
179059000	7	0.007
179071000	8	0.008
179510000	22	0.022
179965000	47	0.047
180073000	3	0.003
180301000	9	0.009
180849000	81	0.081
180892000	14	0.014
181212000	29	0.029
181297000	22	0.022
181319000	23	0.023
181360000	28	0.028
181450000	21	0.021
181935000	28	0.028
182042000	18	0.018
182088000	12	0.012
182194000	18	0.018
182221000	11	0.011
182514000	15	0.015
182808000	8	0.008
182823000	16	0.016
183275000	20	0.02
183888000	8	0.008
184043000	5	0.005
184292000	11	0.011
185161000	8	0.008
185264000	8	0.008
185490000	18	0.018
185993000	15	0.015
186005000	24	0.024
186099000	63	0.063
186137000	6	0.006
186235000	24	0.024
186543000	16	0.016
186614000	17	0.017
186643000	64	0.064
187025000	12	0.012
187286000	29	0.029
187382000	27	0.027
187575000	19	0.019
187582000	16	0.016
188321000	16	0.016
188366000	51	0.051
188453000	30	0.03
188546000	39	0.039
188579000	36	0.036
188836000	22	0.022
188838000	49	0.049
188883000	37	0.037
189382000	31	0.031
189831000	34	0.034
190101000	48	0.048
191007000	23	0.023
191136000	29	0.029
191353000	31	0.031
191612000	24	0.024
191639000	16	0.016
192076000	25	0.025
192727000	9	0.009
193385000	20	0.02
193473000	19	0.019
193802000	40	0.04
194378000	34	0.034
195439000	37	0.037
195563000	14	0.014
195942000	20	0.02
196075000	31	0.031
196131000	28	0.028
196269000	21	0.021
196409000	33	0.033
196540000	34	0.034
196626000	14	0.014
196896000	48	0.048
196956000	25	0.025
197520000	14	0.014
197605000	20	0.02
198218000	11	0.011
198889000	8	0.008
199102000	24	0.024
199113000	12	0.012
199519000	20	0.02
199713000	39	0.039
199788000	28	0.028
200198000	16	0.016
200246000	11	0.011
200674000	14	0.014
200705000	10	0.01
201295000	13	0.013
201917000	13	0.013
201986000	17	0.017
202788000	10	0.01
203048000	5	0.005
203211000	23	0.023
203456000	8	0.008
203613000	2	0.002
203727000	9	0.009
204049000	9	0.009
204090000	10	0.01
204344000	9	0.009
205117000	24	0.024
205135000	3	0.003
205178000	4	0.004
205189000	8	0.008
205226000	13	0.013
205636000	11	0.011
206121000	6	0.006
206558000	7	0.007
206748000	8	0.008
206954000	9	0.009
207181000	10	0.01
207274000	17	0.017
207638000	11	0.011
207894000	17	0.017
208804000	25	0.025
209429000	25	0.025
209456000	32	0.032
209732000	7	0.007
210199000	17	0.017
210575000	7	0.007
210663000	6	0.006
211056000	19	0.019
211228000	23	0.023
211438000	10	0.01
211671000	15	0.015
211827000	9	0.009
211956000	24	0.024
211971000	5	0.005
212624000	11	0.011
212765000	23	0.023
213123000	7	0.007
213744000	31	0.031
213813000	17	0.017
213826000	17	0.017
213990000	27	0.027
214533000	7	0.007
214658000	9	0.009
214793000	8	0.008
215471000	29	0.029
215645000	16	0.016
215657000	14	0.014
216070000	24	0.024
216295000	21	0.021
216408000	18	0.018
216709000	26	0.026
217137000	24	0.024
217485000	19	0.019
217898000	9	0.009
218277000	18	0.018
218372000	27	0.027
218535000	4	0.004
218621000	19	0.019
218860000	25	0.025
218957000	23	0.023
219437000	9	0.009
219481000	10	0.01
219781000	16	0.016
219836000	14	0.014
220267000	21	0.021
220702000	17	0.017
221109000	30	0.03
221363000	16	0.016
221997000	15	0.015
222061000	7	0.007
222174000	12	0.012
222284000	14	0.014
222545000	16	0.016
222582000	26	0.026
222589000	14	0.014
222825000	22	0.022
223112000	10	0.01
223570000	10	0.01
223718000	15	0.015
223808000	13	0.013
223887000	8	0.008
224083000	13	0.013
224099000	7	0.007
224149000	9	0.009
224231000	2	0.002
225170000	14	0.014
225348000	15	0.015
225724000	11	0.011
226035000	8	0.008
226377000	12	0.012
226758000	9	0.009
227146000	10	0.01
227243000	14	0.014
227579000	13	0.013
227819000	8	0.008
227833000	10	0.01
227855000	8	0.008
228378000	15	0.015
228419000	14	0.014
228528000	91	0.091
229165000	13	0.013
229669000	10	0.01
229789000	7	0.007
229824000	16	0.016
229848000	12	0.012
231369000	11	0.011
231494000	6	0.006
231665000	6	0.006
232117000	7	0.007
232143000	20	0.02
232678000	4	0.004
233007000	16	0.016
233160000	24	0.024
233290000	16	0.016
233874000	45	0.045
234303000	17	0.017
234380000	14	0.014
234875000	14	0.014
235631000	12	0.012
236255000	14	0.014
237035000	8	0.008
238048000	133	0.133
238607000	16	0.016
238700000	25	0.025
238706000	25	0.025
239152000	37	0.037
239580000	36	0.036
239595000	36	0.036
239686000	25	0.025
240098000	39	0.039
240639000	26	0.026
240657000	25	0.025
240792000	23	0.023
241006000	36	0.036
241061000	37	0.037
241266000	21	0.021
241484000	29	0.029
241532000	34	0.034
241692000	8	0.008
242334000	22	0.022
242497000	22	0.022
242883000	21	0.021
243227000	9	0.009
243625000	3	0.003
243640000	17	0.017
244184000	9	0.009
244480000	7	0.007
244760000	14	0.014
244851000	5	0.005
244873000	6	0.006
245045000	14	0.014
245467000	8	0.008
245736000	11	0.011
245847000	41	0.041
246115000	13	0.013
246679000	15	0.015
246883000	15	0.015
247176000	18	0.018
248196000	37	0.037
248210000	20	0.02
248403000	90	0.09
248720000	5	0.005
		16.068
		0.0178137

## Sheet: chr2_output
Position	Total number of SNVs per 1000 bases	Ratio
438000	23	0.023
904000	26	0.026		ps: positions are from chromoome 2
941000	25	0.025
1201000	33	0.033
1325000	35	0.035
1478000	23	0.023
1670000	85	0.085
1777000	24	0.024
1838000	35	0.035
2138000	31	0.031
2193000	50	0.05
2687000	30	0.03
2957000	27	0.027
3205000	8	0.008
3973000	18	0.018
4029000	31	0.031
4414000	36	0.036
4607000	32	0.032
4918000	27	0.027
5263000	27	0.027
5843000	37	0.037
6995000	24	0.024
7775000	26	0.026
8189000	13	0.013
8219000	15	0.015
8349000	15	0.015
8457000	15	0.015
8563000	8	0.008
8676000	8	0.008
8677000	10	0.01
8802000	18	0.018
8994000	5	0.005
9011000	5	0.005
9012000	2	0.002
9183000	6	0.006
9594000	7	0.007
9883000	11	0.011
9919000	16	0.016
10043000	6	0.006
10252000	11	0.011
10874000	7	0.007
10976000	11	0.011
11000000	16	0.016
11027000	10	0.01
11244000	19	0.019
11366000	5	0.005
11421000	6	0.006
11574000	4	0.004
11703000	6	0.006
11745000	12	0.012
11808000	14	0.014
12180000	16	0.016
12718000	10	0.01
12871000	7	0.007
13374000	22	0.022
13590000	21	0.021
13664000	33	0.033
13947000	12	0.012
14054000	22	0.022
14622000	33	0.033
14665000	35	0.035
14723000	21	0.021
15374000	28	0.028
15463000	3	0.003
15663000	13	0.013
16649000	27	0.027
16674000	23	0.023
16923000	20	0.02
18705000	29	0.029
18744000	19	0.019
18919000	13	0.013
18978000	13	0.013
19465000	13	0.013
19480000	18	0.018
20041000	19	0.019
20310000	13	0.013
20466000	5	0.005
20775000	2	0.002
20805000	4	0.004
20947000	6	0.006
21053000	18	0.018
21058000	25	0.025
21484000	23	0.023
21573000	12	0.012
21769000	29	0.029
21954000	22	0.022
22102000	32	0.032
22104000	27	0.027
23112000	24	0.024
23318000	29	0.029
23739000	6	0.006
24059000	10	0.01
24494000	69	0.069
24649000	12	0.012
24786000	12	0.012
24979000	6	0.006
25151000	9	0.009
25298000	5	0.005
25308000	12	0.012
26418000	12	0.012
26435000	10	0.01
27861000	92	0.092
27870000	9	0.009
27966000	11	0.011
28336000	10	0.01
28525000	7	0.007
29078000	5	0.005
29231000	9	0.009
29776000	10	0.01
29779000	13	0.013
30196000	22	0.022
30256000	15	0.015
30416000	15	0.015
30465000	5	0.005
30659000	9	0.009
30734000	15	0.015
31010000	51	0.051
31089000	28	0.028
31137000	24	0.024
31144000	28	0.028
31265000	25	0.025
31411000	23	0.023
31504000	12	0.012
31705000	19	0.019
31710000	20	0.02
32113000	13	0.013
32159000	6	0.006
32366000	20	0.02
32752000	3	0.003
33035000	9	0.009
33412000	158	0.158
33603000	11	0.011
33738000	18	0.018
34245000	24	0.024
35094000	17	0.017
35211000	35	0.035
35420000	32	0.032
35911000	20	0.02
35935000	26	0.026
36081000	25	0.025
36273000	14	0.014
36342000	1	0.001
36587000	19	0.019
36730000	9	0.009
37116000	5	0.005
37590000	4	0.004
37700000	9	0.009
37848000	8	0.008
38085000	11	0.011
38478000	13	0.013
39752000	7	0.007
39759000	11	0.011
39857000	13	0.013
40074000	10	0.01
40458000	10	0.01
40587000	14	0.014
40661000	16	0.016
40921000	16	0.016
41040000	21	0.021
41807000	15	0.015
42904000	9	0.009
43158000	5	0.005
43192000	15	0.015
44143000	4	0.004
44763000	8	0.008
45020000	13	0.013
45313000	18	0.018
45385000	14	0.014
46190000	11	0.011
46279000	10	0.01
46357000	8	0.008
46825000	7	0.007
47112000	9	0.009
47330000	15	0.015
47550000	12	0.012
47797000	6	0.006
48193000	17	0.017
48351000	11	0.011
48353000	11	0.011
48984000	17	0.017
48987000	20	0.02
48988000	23	0.023
49747000	30	0.03
49907000	32	0.032
49949000	26	0.026
50774000	28	0.028
51457000	25	0.025
51731000	29	0.029
52104000	34	0.034
52123000	36	0.036
52405000	33	0.033
52554000	28	0.028
53780000	16	0.016
53862000	8	0.008
54154000	27	0.027
54324000	9	0.009
54548000	6	0.006
56079000	23	0.023
56283000	19	0.019
56388000	18	0.018
56492000	26	0.026
56549000	15	0.015
56693000	27	0.027
56872000	26	0.026
57106000	33	0.033
57126000	24	0.024
57396000	25	0.025
57844000	45	0.045
58461000	9	0.009
58569000	14	0.014
58663000	13	0.013
58899000	29	0.029
59824000	27	0.027
60330000	30	0.03
60383000	25	0.025
60691000	13	0.013
60732000	15	0.015
60919000	16	0.016
60992000	8	0.008
61032000	6	0.006
61143000	5	0.005
61243000	10	0.01
61557000	2	0.002
61834000	16	0.016
61893000	12	0.012
61947000	1	0.001
62007000	10	0.01
62129000	10	0.01
62442000	12	0.012
62592000	9	0.009
62713000	9	0.009
62795000	7	0.007
63000000	5	0.005
63009000	4	0.004
63620000	17	0.017
63739000	6	0.006
63800000	8	0.008
63816000	8	0.008
63879000	11	0.011
64065000	11	0.011
64079000	6	0.006
64482000	6	0.006
64787000	5	0.005
64826000	8	0.008
64945000	9	0.009
65031000	9	0.009
65208000	6	0.006
65623000	7	0.007
66138000	22	0.022
66185000	27	0.027
66212000	16	0.016
66271000	30	0.03
66585000	10	0.01
66666000	9	0.009
67233000	19	0.019
67830000	33	0.033
68164000	10	0.01
68731000	9	0.009
68900000	9	0.009
69280000	6	0.006
69416000	6	0.006
69653000	12	0.012
69821000	5	0.005
70422000	14	0.014
70565000	17	0.017
70703000	13	0.013
70715000	9	0.009
70807000	13	0.013
70816000	13	0.013
71001000	12	0.012
71450000	13	0.013
71510000	13	0.013
71771000	14	0.014
71834000	11	0.011
72072000	24	0.024
72273000	9	0.009
72484000	12	0.012
72612000	11	0.011
72793000	10	0.01
72868000	14	0.014
73065000	11	0.011
73245000	5	0.005
73468000	10	0.01
73650000	6	0.006
74089000	38	0.038
74096000	3	0.003
74388000	3	0.003
74504000	7	0.007
74516000	11	0.011
74598000	250	0.25
74782000	25	0.025
74846000	18	0.018
74928000	10	0.01
75283000	20	0.02
75581000	30	0.03
75715000	8	0.008
75884000	6	0.006
76163000	29	0.029
76165000	25	0.025
76344000	30	0.03
76563000	41	0.041
76572000	19	0.019
77003000	25	0.025
77920000	24	0.024
78079000	24	0.024
78513000	19	0.019
78571000	21	0.021
78603000	28	0.028
79016000	22	0.022
79142000	29	0.029
79576000	26	0.026
79614000	27	0.027
79650000	24	0.024
79877000	14	0.014
80071000	29	0.029
80184000	28	0.028
80371000	26	0.026
80588000	26	0.026
80821000	46	0.046
81009000	22	0.022
81038000	41	0.041
81047000	36	0.036
81127000	43	0.043
81387000	43	0.043
81424000	59	0.059
81463000	44	0.044
81499000	27	0.027
81596000	32	0.032
81757000	40	0.04
81800000	38	0.038
82294000	24	0.024
82315000	35	0.035
82719000	39	0.039
82830000	39	0.039
82836000	33	0.033
82837000	45	0.045
83008000	29	0.029
83049000	43	0.043
83299000	31	0.031
83432000	28	0.028
83592000	41	0.041
83741000	19	0.019
84365000	44	0.044
84390000	27	0.027
84728000	16	0.016
84791000	19	0.019
84792000	20	0.02
84849000	15	0.015
85312000	15	0.015
85775000	13	0.013
85926000	7	0.007
86045000	5	0.005
86490000	9	0.009
86630000	14	0.014
86832000	97	0.097
87027000	8	0.008
87106000	11	0.011
87306000	8	0.008
87395000	16	0.016
87833000	6	0.006
87860000	9	0.009
87953000	5	0.005
87982000	8	0.008
88455000	13	0.013
88538000	18	0.018
88612000	15	0.015
88702000	13	0.013
88801000	16	0.016
89068000	8	0.008
89100000	27	0.027
89360000	27	0.027
91746000	25	0.025
91890000	19	0.019
92263000	52	0.052
95531000	14	0.014
95920000	12	0.012
96218000	8	0.008
96576000	17	0.017
96596000	6	0.006
96735000	6	0.006
97120000	15	0.015
97491000	4	0.004
97719000	3	0.003
97735000	2	0.002
97759000	4	0.004
98189000	9	0.009
98273000	21	0.021
98436000	6	0.006
98596000	16	0.016
98643000	12	0.012
98723000	4	0.004
99222000	12	0.012
99788000	7	0.007
99899000	12	0.012
100032000	5	0.005
100042000	9	0.009
100328000	12	0.012
100560000	13	0.013
100608000	15	0.015
100733000	11	0.011
100759000	21	0.021
100814000	15	0.015
100873000	16	0.016
101406000	9	0.009
101700000	11	0.011
102213000	11	0.011
103291000	18	0.018
103489000	15	0.015
103806000	46	0.046
104590000	26	0.026
105128000	13	0.013
105172000	16	0.016
105210000	25	0.025
105440000	15	0.015
106351000	8	0.008
106641000	17	0.017
106845000	9	0.009
106948000	24	0.024
107123000	11	0.011
107127000	15	0.015
107207000	21	0.021
107347000	37	0.037
107833000	26	0.026
107858000	40	0.04
108042000	21	0.021
108439000	26	0.026
108462000	13	0.013
109122000	7	0.007
109218000	6	0.006
110308000	8	0.008
110356000	8	0.008
110603000	1	0.001
110725000	1	0.001
110767000	2	0.002
111486000	14	0.014
111569000	12	0.012
111581000	15	0.015
111717000	25	0.025
112124000	9	0.009
112136000	8	0.008
112457000	5	0.005
113046000	16	0.016
113528000	6	0.006
114582000	6	0.006
114843000	31	0.031
114950000	32	0.032
114987000	27	0.027
115350000	33	0.033
115361000	30	0.03
115763000	21	0.021
115770000	42	0.042
115890000	28	0.028
115909000	34	0.034
116591000	27	0.027
116745000	29	0.029
116943000	31	0.031
117131000	37	0.037
117310000	38	0.038
117748000	23	0.023
118278000	19	0.019
118292000	15	0.015
118476000	15	0.015
118499000	21	0.021
118713000	4	0.004
119006000	17	0.017
119662000	23	0.023
119682000	27	0.027
119942000	10	0.01
119988000	11	0.011
120110000	9	0.009
120794000	8	0.008
120809000	10	0.01
120866000	7	0.007
120935000	5	0.005
122045000	8	0.008
122259000	9	0.009
122347000	6	0.006
122354000	8	0.008
122558000	10	0.01
122777000	7	0.007
122845000	13	0.013
122889000	17	0.017
122893000	12	0.012
123222000	17	0.017
123813000	30	0.03
123895000	28	0.028
123948000	23	0.023
124094000	27	0.027
124426000	26	0.026
124502000	21	0.021
124701000	40	0.04
124734000	24	0.024
124830000	27	0.027
124857000	24	0.024
124965000	40	0.04
125047000	34	0.034
125382000	33	0.033
125494000	35	0.035
125726000	33	0.033
125955000	28	0.028
126038000	27	0.027
126154000	33	0.033
126304000	48	0.048
126479000	27	0.027
126513000	33	0.033
126578000	24	0.024
127152000	19	0.019
127193000	26	0.026
127793000	13	0.013
128084000	13	0.013
128430000	7	0.007
128470000	6	0.006
129957000	23	0.023
130300000	36	0.036
130453000	28	0.028
130510000	20	0.02
130553000	28	0.028
130688000	14	0.014
131421000	18	0.018
131634000	21	0.021
131660000	23	0.023
131799000	46	0.046
132042000	17	0.017
132119000	28	0.028
133429000	4	0.004
133629000	8	0.008
133694000	8	0.008
133724000	12	0.012
134074000	18	0.018
134197000	7	0.007
134285000	17	0.017
134408000	19	0.019
134876000	2	0.002
135139000	9	0.009
135155000	12	0.012
135358000	22	0.022
135499000	19	0.019
135741000	113	0.113
135759000	7	0.007
136011000	6	0.006
136460000	8	0.008
136660000	6	0.006
136758000	11	0.011
136842000	12	0.012
136937000	18	0.018
136941000	17	0.017
136958000	25	0.025
137115000	13	0.013
137648000	36	0.036
138221000	32	0.032
138234000	43	0.043
138285000	40	0.04
138583000	18	0.018
138865000	17	0.017
138886000	14	0.014
139486000	22	0.022
140729000	47	0.047
141113000	58	0.058
141410000	25	0.025
141443000	36	0.036
141572000	30	0.03
141930000	38	0.038
142183000	10	0.01
142729000	17	0.017
142746000	22	0.022
142789000	23	0.023
143252000	19	0.019
143727000	13	0.013
144205000	29	0.029
144492000	17	0.017
144683000	16	0.016
145055000	14	0.014
145131000	12	0.012
145351000	8	0.008
145640000	12	0.012
146008000	14	0.014
146492000	12	0.012
146763000	11	0.011
147030000	19	0.019
147054000	27	0.027
147339000	21	0.021
147808000	21	0.021
148295000	33	0.033
148692000	8	0.008
148789000	3	0.003
148995000	10	0.01
149021000	10	0.01
149420000	7	0.007
149480000	5	0.005
150253000	7	0.007
150769000	13	0.013
150838000	19	0.019
151031000	5	0.005
151067000	11	0.011
151222000	16	0.016
152021000	12	0.012
152717000	60	0.06
153431000	25	0.025
153528000	9	0.009
153822000	19	0.019
154095000	47	0.047
154145000	23	0.023
154234000	30	0.03
154416000	34	0.034
154585000	32	0.032
154636000	39	0.039
154816000	24	0.024
154818000	31	0.031
154867000	28	0.028
154950000	37	0.037
156628000	17	0.017
156868000	12	0.012
156916000	23	0.023
157023000	13	0.013
157075000	13	0.013
157191000	2	0.002
157547000	12	0.012
157558000	21	0.021
157862000	12	0.012
158051000	9	0.009
158153000	22	0.022
158624000	5	0.005
158650000	1	0.001
158801000	8	0.008
159112000	8	0.008
159840000	3	0.003
160139000	56	0.056
160354000	5	0.005
160875000	11	0.011
160890000	14	0.014
161737000	13	0.013
161892000	13	0.013
162233000	5	0.005
162398000	25	0.025
162622000	20	0.02
162894000	22	0.022
162951000	3	0.003
162956000	9	0.009
162992000	5	0.005
163096000	10	0.01
163276000	34	0.034
163283000	13	0.013
163820000	30	0.03
163968000	26	0.026
164053000	25	0.025
164268000	12	0.012
164304000	19	0.019
164342000	18	0.018
164561000	13	0.013
164629000	9	0.009
164630000	22	0.022
164842000	22	0.022
165065000	14	0.014
165129000	20	0.02
165772000	57	0.057
166106000	14	0.014
166176000	22	0.022
166183000	95	0.095
166289000	11	0.011
167163000	57	0.057
167303000	33	0.033
167327000	52	0.052
167524000	37	0.037
168075000	15	0.015
168197000	17	0.017
168613000	6	0.006
168891000	5	0.005
168925000	13	0.013
168970000	11	0.011
169246000	15	0.015
169273000	12	0.012
169423000	8	0.008
169633000	9	0.009
170008000	14	0.014
170732000	15	0.015
170862000	8	0.008
170954000	15	0.015
171402000	15	0.015
171411000	17	0.017
171499000	13	0.013
171687000	76	0.076
171978000	8	0.008
172244000	4	0.004
172246000	12	0.012
173229000	6	0.006
173494000	11	0.011
173584000	12	0.012
173643000	15	0.015
173885000	87	0.087
174190000	19	0.019
174589000	18	0.018
174618000	16	0.016
174753000	16	0.016
174848000	7	0.007
174915000	4	0.004
174960000	6	0.006
175229000	12	0.012
175412000	8	0.008
175565000	6	0.006
175838000	4	0.004
175865000	7	0.007
176373000	31	0.031
176446000	12	0.012
176461000	15	0.015
176551000	22	0.022
177001000	13	0.013
177443000	16	0.016
177730000	16	0.016
178103000	5	0.005
178124000	7	0.007
178268000	5	0.005
178706000	15	0.015
178817000	16	0.016
179200000	13	0.013
179581000	142	0.142
179615000	15	0.015
179676000	16	0.016
180317000	8	0.008
180493000	23	0.023
180852000	5	0.005
181193000	21	0.021
181259000	23	0.023
181916000	8	0.008
182071000	19	0.019
182188000	28	0.028
182819000	15	0.015
182833000	12	0.012
183015000	7	0.007
183071000	23	0.023
183202000	22	0.022
183695000	11	0.011
183801000	3	0.003
183917000	18	0.018
184098000	5	0.005
184561000	31	0.031
184565000	26	0.026
184692000	40	0.04
184719000	18	0.018
185303000	25	0.025
185491000	25	0.025
185524000	20	0.02
186114000	31	0.031
186316000	18	0.018
186510000	21	0.021
186677000	19	0.019
186696000	11	0.011
186938000	15	0.015
187124000	10	0.01
187386000	6	0.006
187593000	12	0.012
187681000	32	0.032
187742000	30	0.03
187840000	20	0.02
188235000	23	0.023
188369000	15	0.015
188550000	16	0.016
188656000	20	0.02
188917000	16	0.016
189425000	4	0.004
190051000	12	0.012
190168000	8	0.008
190324000	8	0.008
190519000	12	0.012
191177000	11	0.011
191797000	8	0.008
191903000	25	0.025
192055000	2	0.002
192188000	3	0.003
192829000	39	0.039
192968000	13	0.013
193272000	19	0.019
193337000	33	0.033
193596000	16	0.016
194201000	34	0.034
194807000	30	0.03
194822000	33	0.033
194862000	33	0.033
194917000	47	0.047
195105000	37	0.037
195325000	29	0.029
195411000	19	0.019
195616000	34	0.034
195864000	35	0.035
196727000	26	0.026
196810000	18	0.018
197451000	16	0.016
197969000	5	0.005
198529000	12	0.012
198976000	9	0.009
199611000	32	0.032
199701000	23	0.023
199824000	36	0.036
199921000	32	0.032
200296000	14	0.014
200314000	8	0.008
200516000	19	0.019
200517000	13	0.013
201853000	23	0.023
201932000	5	0.005
202272000	16	0.016
202301000	4	0.004
202523000	19	0.019
203509000	2	0.002
203524000	7	0.007
203865000	15	0.015
203973000	12	0.012
204274000	6	0.006
204452000	9	0.009
204735000	83	0.083
204865000	16	0.016
205305000	23	0.023
205449000	5	0.005
205498000	13	0.013
205587000	9	0.009
206298000	8	0.008
206438000	18	0.018
206461000	19	0.019
206478000	12	0.012
206929000	8	0.008
207844000	19	0.019
207987000	10	0.01
208139000	9	0.009
208822000	6	0.006
208870000	8	0.008
209640000	15	0.015
210382000	6	0.006
210478000	10	0.01
210644000	16	0.016
210835000	41	0.041
210960000	8	0.008
212248000	214	0.214
212487000	12	0.012
212991000	29	0.029
213131000	20	0.02
213264000	14	0.014
213610000	26	0.026
213862000	24	0.024
213873000	23	0.023
214198000	14	0.014
214339000	38	0.038
214690000	39	0.039
214837000	32	0.032
214961000	16	0.016
215158000	22	0.022
215355000	20	0.02
216256000	59	0.059
216293000	69	0.069
216334000	11	0.011
217295000	9	0.009
217363000	16	0.016
217674000	20	0.02
217774000	18	0.018
217887000	21	0.021
218122000	24	0.024
218204000	15	0.015
218959000	8	0.008
219183000	10	0.01
219235000	4	0.004
219381000	4	0.004
219656000	5	0.005
221510000	21	0.021
221548000	20	0.02
221626000	14	0.014
221736000	25	0.025
222224000	27	0.027
222293000	13	0.013
222572000	25	0.025
222625000	20	0.02
222642000	19	0.019
223212000	10	0.01
223238000	14	0.014
223402000	13	0.013
223439000	3	0.003
223447000	8	0.008
223469000	6	0.006
223590000	8	0.008
223873000	3	0.003
224017000	9	0.009
224166000	13	0.013
224805000	9	0.009
224966000	12	0.012
225262000	10	0.01
225349000	10	0.01
225503000	16	0.016
225751000	36	0.036
226331000	26	0.026
226491000	36	0.036
226547000	12	0.012
226620000	9	0.009
226669000	15	0.015
226962000	8	0.008
227146000	14	0.014
227243000	8	0.008
227305000	9	0.009
227963000	33	0.033
228060000	8	0.008
228407000	8	0.008
228653000	8	0.008
228741000	13	0.013
229048000	24	0.024
229212000	25	0.025
229292000	36	0.036
229811000	22	0.022
229988000	28	0.028
230129000	21	0.021
230141000	20	0.02
230271000	28	0.028
230686000	7	0.007
230851000	11	0.011
231331000	150	0.15
231691000	8	0.008
231892000	9	0.009
231927000	69	0.069
231975000	6	0.006
231988000	47	0.047
232151000	6	0.006
232543000	3	0.003
232561000	9	0.009
232679000	6	0.006
232686000	14	0.014
232919000	5	0.005
233091000	8	0.008
233134000	10	0.01
233252000	8	0.008
233287000	13	0.013
233444000	7	0.007
233452000	9	0.009
233868000	17	0.017
233954000	15	0.015
234066000	15	0.015
234454000	7	0.007
234468000	18	0.018
234909000	7	0.007
235052000	4	0.004
235243000	5	0.005
235318000	18	0.018
235439000	7	0.007
235447000	12	0.012
235533000	9	0.009
235829000	8	0.008
235939000	6	0.006
235954000	7	0.007
235981000	9	0.009
236108000	10	0.01
236206000	12	0.012
236285000	8	0.008
236500000	8	0.008
236899000	8	0.008
236920000	7	0.007
237063000	15	0.015
237075000	22	0.022
237107000	8	0.008
237618000	18	0.018
238083000	12	0.012
238875000	10	0.01
239095000	2	0.002
239152000	6	0.006
239162000	39	0.039
239332000	8	0.008
239480000	11	0.011
239488000	6	0.006
240257000	6	0.006
240431000	14	0.014
240973000	18	0.018
241162000	24	0.024
241216000	16	0.016
241960000	14	0.014
242136000	12	0.012
242199000	5	0.005
242378000	5	0.005
242588000	4	0.004
242860000	3	0.003
242917000	14	0.014
242936000	11	0.011
		18.363
		0.0188532

## Sheet: chr3_output
Position	Total number of SNVs per 1000 bases	Ratio
369000	84	0.084
403000	72	0.072		ps: positions are from chromoome 3
458000	18	0.018
915000	33	0.033
1398000	36	0.036
1604000	27	0.027
1828000	19	0.019
2699000	30	0.03
2905000	20	0.02
3326000	45	0.045
3337000	26	0.026
3350000	37	0.037
3441000	32	0.032
3499000	30	0.03
3531000	45	0.045
3539000	25	0.025
3608000	29	0.029
4547000	13	0.013
4998000	12	0.012
5086000	14	0.014
5386000	15	0.015
5399000	30	0.03
5476000	21	0.021
5559000	16	0.016
5924000	33	0.033
6007000	46	0.046
6117000	34	0.034
6289000	19	0.019
6589000	7	0.007
7001000	34	0.034
7414000	17	0.017
7550000	28	0.028
7755000	26	0.026
7833000	24	0.024
8074000	24	0.024
8118000	15	0.015
8385000	10	0.01
8443000	15	0.015
8590000	250	0.25
9074000	20	0.02
9102000	9	0.009
9296000	19	0.019
9620000	13	0.013
9886000	3	0.003
10080000	4	0.004
10161000	7	0.007
10319000	8	0.008
10330000	7	0.007
10412000	13	0.013
10488000	11	0.011
10582000	18	0.018
10590000	13	0.013
10735000	16	0.016
10845000	18	0.018
10939000	20	0.02
11062000	22	0.022
11071000	23	0.023
11574000	6	0.006
11599000	6	0.006
11674000	7	0.007
12345000	8	0.008
12390000	9	0.009
12399000	8	0.008
12402000	6	0.006
12739000	10	0.01
12905000	13	0.013
13050000	10	0.01
13169000	6	0.006
13653000	17	0.017
13679000	218	0.218
14048000	11	0.011
14184000	5	0.005
14266000	7	0.007
14991000	2	0.002
15164000	4	0.004
15414000	11	0.011
15890000	8	0.008
16051000	7	0.007
16091000	9	0.009
16722000	15	0.015
16757000	26	0.026
16953000	16	0.016
17307000	8	0.008
17453000	7	0.007
17923000	17	0.017
17981000	14	0.014
18052000	27	0.027
18281000	20	0.02
18320000	20	0.02
18600000	15	0.015
18889000	14	0.014
19236000	12	0.012
19527000	13	0.013
19565000	14	0.014
19822000	34	0.034
19838000	23	0.023
19939000	13	0.013
20190000	7	0.007
20456000	21	0.021
21264000	33	0.033
21436000	39	0.039
21447000	52	0.052
21684000	33	0.033
21766000	33	0.033
21949000	42	0.042
22194000	31	0.031
22439000	39	0.039
22639000	19	0.019
22697000	30	0.03
22956000	27	0.027
22976000	17	0.017
23220000	20	0.02
23276000	14	0.014
23369000	14	0.014
23618000	12	0.012
23630000	9	0.009
23884000	3	0.003
24010000	6	0.006
24340000	14	0.014
24414000	9	0.009
24456000	13	0.013
24621000	24	0.024
24821000	21	0.021
24870000	8	0.008
25317000	10	0.01
25374000	11	0.011
25630000	9	0.009
25920000	22	0.022
26021000	28	0.028
26084000	39	0.039
26672000	41	0.041
26820000	39	0.039
26937000	28	0.028
26982000	36	0.036
27025000	24	0.024
27795000	4	0.004
27907000	16	0.016
28070000	21	0.021
28418000	16	0.016
28478000	23	0.023
28660000	21	0.021
28927000	18	0.018
29344000	10	0.01
29438000	9	0.009
30110000	17	0.017
30244000	8	0.008
30440000	9	0.009
31297000	15	0.015
31360000	13	0.013
31527000	17	0.017
31562000	14	0.014
31751000	8	0.008
31764000	8	0.008
31900000	8	0.008
32024000	8	0.008
32273000	19	0.019
32446000	3	0.003
32527000	5	0.005
32948000	9	0.009
33166000	20	0.02
33186000	4	0.004
33402000	2	0.002
33970000	41	0.041
34068000	29	0.029
34189000	30	0.03
34321000	35	0.035
34640000	34	0.034
34764000	36	0.036
34944000	27	0.027
35135000	26	0.026
35842000	28	0.028
35995000	27	0.027
37082000	4	0.004
37115000	3	0.003
37228000	4	0.004
37508000	6	0.006
37543000	10	0.01
37702000	13	0.013
37753000	13	0.013
37780000	8	0.008
37851000	7	0.007
38040000	16	0.016
38044000	27	0.027
38334000	8	0.008
38359000	14	0.014
38742000	20	0.02
38961000	55	0.055
39183000	5	0.005
39199000	6	0.006
39438000	11	0.011
39554000	19	0.019
39611000	22	0.022
39715000	24	0.024
39917000	18	0.018
39934000	9	0.009
40033000	14	0.014
40137000	9	0.009
40371000	12	0.012
40818000	12	0.012
41335000	8	0.008
41359000	3	0.003
42412000	13	0.013
42449000	15	0.015
42645000	7	0.007
42686000	7	0.007
42940000	14	0.014
43182000	9	0.009
43248000	7	0.007
43258000	8	0.008
43506000	6	0.006
43697000	11	0.011
43834000	8	0.008
44431000	13	0.013
44590000	20	0.02
44619000	12	0.012
44734000	21	0.021
44882000	21	0.021
44930000	12	0.012
45030000	25	0.025
45031000	6	0.006
45143000	13	0.013
45863000	5	0.005
45867000	7	0.007
46016000	19	0.019
46052000	14	0.014
46059000	17	0.017
46340000	20	0.02
46420000	12	0.012
46564000	1	0.001
46684000	12	0.012
46909000	6	0.006
47153000	7	0.007
47586000	19	0.019
47617000	5	0.005
47631000	7	0.007
47725000	5	0.005
47777000	13	0.013
48170000	7	0.007
48192000	7	0.007
48502000	55	0.055
48748000	8	0.008
48807000	11	0.011
49131000	6	0.006
49372000	27	0.027
49972000	9	0.009
50000000	12	0.012
50039000	6	0.006
50177000	11	0.011
50204000	14	0.014
50382000	21	0.021
50395000	19	0.019
50549000	16	0.016
50811000	12	0.012
50882000	19	0.019
50911000	24	0.024
51065000	24	0.024
51134000	26	0.026
51341000	24	0.024
51448000	6	0.006
51576000	9	0.009
51688000	7	0.007
51886000	25	0.025
51916000	12	0.012
52064000	10	0.01
52184000	8	0.008
52746000	7	0.007
52897000	7	0.007
53012000	4	0.004
53233000	3	0.003
53312000	10	0.01
53582000	6	0.006
53732000	8	0.008
53759000	4	0.004
54013000	7	0.007
54015000	27	0.027
54117000	26	0.026
54449000	27	0.027
54605000	23	0.023
55335000	35	0.035
55376000	36	0.036
55429000	25	0.025
55491000	18	0.018
55504000	138	0.138
55927000	34	0.034
55966000	30	0.03
56187000	27	0.027
56624000	6	0.006
56806000	5	0.005
57247000	11	0.011
57693000	16	0.016
57829000	6	0.006
57849000	5	0.005
57905000	14	0.014
58676000	20	0.02
58693000	13	0.013
58899000	23	0.023
58926000	11	0.011
59081000	10	0.01
59177000	13	0.013
59321000	11	0.011
59343000	18	0.018
59375000	17	0.017
59423000	11	0.011
59479000	6	0.006
59497000	14	0.014
59961000	15	0.015
60066000	14	0.014
60276000	18	0.018
60433000	17	0.017
60659000	23	0.023
60910000	12	0.012
60948000	19	0.019
61467000	15	0.015
61704000	8	0.008
61808000	3	0.003
61918000	12	0.012
62054000	9	0.009
62064000	9	0.009
62084000	4	0.004
62286000	11	0.011
62316000	5	0.005
62354000	11	0.011
62368000	15	0.015
62463000	39	0.039
62678000	12	0.012
62873000	16	0.016
63045000	14	0.014
63198000	8	0.008
63271000	18	0.018
63478000	16	0.016
63540000	12	0.012
63550000	24	0.024
63997000	10	0.01
64365000	10	0.01
64392000	13	0.013
64526000	43	0.043
64911000	14	0.014
65121000	23	0.023
65171000	14	0.014
66834000	20	0.02
67449000	6	0.006
67561000	10	0.01
67636000	12	0.012
67670000	7	0.007
67846000	15	0.015
67929000	23	0.023
68051000	33	0.033
68360000	46	0.046
68402000	25	0.025
68513000	42	0.042
68547000	33	0.033
68655000	49	0.049
68880000	36	0.036
69731000	13	0.013
69761000	8	0.008
70054000	9	0.009
70635000	26	0.026
70870000	11	0.011
70924000	19	0.019
70958000	13	0.013
71130000	14	0.014
71132000	13	0.013
71553000	15	0.015
71584000	21	0.021
71585000	20	0.02
72860000	4	0.004
72895000	5	0.005
72971000	30	0.03
73111000	66	0.066
73147000	10	0.01
73305000	6	0.006
73946000	21	0.021
74067000	33	0.033
74075000	26	0.026
74190000	22	0.022
74225000	28	0.028
74716000	25	0.025
75005000	35	0.035
75277000	30	0.03
75430000	21	0.021
75481000	9	0.009
75815000	19	0.019
76086000	27	0.027
76381000	23	0.023
76623000	21	0.021
76638000	18	0.018
77502000	21	0.021
77684000	136	0.136
77909000	24	0.024
78284000	20	0.02
78357000	33	0.033
78418000	30	0.03
78658000	12	0.012
79108000	17	0.017
79142000	15	0.015
79223000	16	0.016
79557000	11	0.011
79753000	31	0.031
80364000	33	0.033
80389000	32	0.032
80489000	31	0.031
80579000	30	0.03
80738000	9	0.009
80778000	32	0.032
80876000	49	0.049
81089000	34	0.034
81530000	18	0.018
82534000	24	0.024
82740000	22	0.022
82794000	26	0.026
82948000	25	0.025
83194000	30	0.03
83301000	25	0.025
83548000	27	0.027
83658000	32	0.032
84002000	13	0.013
84156000	16	0.016
84209000	8	0.008
84251000	21	0.021
84703000	22	0.022
84795000	22	0.022
85125000	28	0.028
85253000	33	0.033
85421000	31	0.031
85916000	22	0.022
86054000	33	0.033
86074000	22	0.022
86317000	35	0.035
86339000	29	0.029
86635000	34	0.034
86650000	26	0.026
87238000	22	0.022
87602000	16	0.016
87648000	23	0.023
88119000	7	0.007
88404000	19	0.019
88439000	27	0.027
88554000	13	0.013
88652000	34	0.034
88739000	36	0.036
88791000	28	0.028
89363000	15	0.015
90000000	25	0.025
90261000	21	0.021
90311000	27	0.027
90433000	31	0.031
93614000	8	0.008
93616000	9	0.009
93875000	16	0.016
93948000	19	0.019
93995000	26	0.026
94307000	36	0.036
94502000	21	0.021
94567000	23	0.023
94684000	25	0.025
94851000	17	0.017
94939000	14	0.014
95307000	34	0.034
96331000	45	0.045
96985000	38	0.038
97598000	24	0.024
97745000	13	0.013
97768000	14	0.014
98027000	30	0.03
98109000	113	0.113
98480000	9	0.009
98947000	20	0.02
99267000	35	0.035
99644000	11	0.011
99738000	6	0.006
99851000	8	0.008
99966000	12	0.012
100122000	3	0.003
100201000	5	0.005
100309000	14	0.014
100367000	6	0.006
100527000	27	0.027
100715000	21	0.021
100796000	11	0.011
100875000	12	0.012
101018000	10	0.01
101114000	6	0.006
101225000	4	0.004
101331000	16	0.016
101454000	11	0.011
101486000	8	0.008
101569000	10	0.01
101590000	8	0.008
101801000	13	0.013
102029000	43	0.043
102069000	28	0.028
102151000	20	0.02
102292000	33	0.033
102771000	26	0.026
102885000	33	0.033
103309000	38	0.038
103337000	44	0.044
103414000	47	0.047
103731000	35	0.035
103732000	32	0.032
103738000	38	0.038
103922000	39	0.039
103926000	30	0.03
104056000	31	0.031
104069000	23	0.023
104177000	14	0.014
104268000	13	0.013
104295000	21	0.021
104365000	16	0.016
104582000	23	0.023
104708000	25	0.025
104814000	20	0.02
104848000	30	0.03
104862000	15	0.015
104888000	24	0.024
104906000	19	0.019
105520000	6	0.006
105525000	13	0.013
106015000	24	0.024
106053000	20	0.02
106194000	26	0.026
106300000	17	0.017
106367000	30	0.03
106650000	29	0.029
106735000	32	0.032
106800000	14	0.014
106802000	19	0.019
106880000	18	0.018
106979000	2	0.002
107032000	14	0.014
107116000	20	0.02
107575000	19	0.019
107751000	10	0.01
107970000	14	0.014
108736000	24	0.024
108966000	26	0.026
109757000	22	0.022
109792000	29	0.029
109836000	13	0.013
110031000	9	0.009
110312000	34	0.034
110454000	17	0.017
110702000	21	0.021
110837000	141	0.141
111185000	25	0.025
111464000	16	0.016
111588000	19	0.019
111769000	29	0.029
111798000	9	0.009
112020000	5	0.005
112224000	16	0.016
112274000	7	0.007
112336000	9	0.009
112504000	13	0.013
112583000	13	0.013
112802000	8	0.008
112939000	11	0.011
113047000	3	0.003
113110000	7	0.007
113349000	8	0.008
113369000	3	0.003
113442000	22	0.022
113543000	12	0.012
113664000	21	0.021
113716000	3	0.003
113924000	21	0.021
114032000	10	0.01
114075000	8	0.008
114775000	5	0.005
114970000	13	0.013
115076000	28	0.028
115124000	15	0.015
115210000	25	0.025
115271000	23	0.023
115337000	16	0.016
115581000	18	0.018
115793000	16	0.016
116149000	17	0.017
116209000	19	0.019
116438000	17	0.017
116484000	16	0.016
116509000	23	0.023
116564000	31	0.031
116807000	29	0.029
116810000	30	0.03
116991000	42	0.042
117070000	26	0.026
117138000	27	0.027
117340000	31	0.031
117647000	25	0.025
118372000	29	0.029
118515000	20	0.02
118565000	25	0.025
118575000	27	0.027
118885000	14	0.014
119592000	6	0.006
119597000	5	0.005
119949000	6	0.006
120280000	7	0.007
120394000	31	0.031
120435000	6	0.006
120910000	30	0.03
121218000	6	0.006
121498000	14	0.014
121697000	37	0.037
121964000	13	0.013
122051000	18	0.018
122087000	13	0.013
122363000	7	0.007
122382000	9	0.009
123047000	58	0.058
123116000	8	0.008
123384000	13	0.013
123428000	70	0.07
123443000	14	0.014
123511000	7	0.007
123657000	4	0.004
124070000	23	0.023
124513000	17	0.017
125190000	4	0.004
125372000	11	0.011
125559000	14	0.014
125698000	9	0.009
125859000	9	0.009
125930000	6	0.006
126008000	9	0.009
126486000	9	0.009
126523000	1	0.001
126624000	9	0.009
126777000	24	0.024
127019000	15	0.015
127042000	25	0.025
127116000	14	0.014
127491000	6	0.006
127551000	9	0.009
127778000	2	0.002
127833000	9	0.009
128259000	13	0.013
128787000	7	0.007
129123000	21	0.021
129314000	15	0.015
129481000	10	0.01
129607000	4	0.004
129847000	7	0.007
130013000	22	0.022
130141000	21	0.021
130200000	27	0.027
130456000	6	0.006
130931000	16	0.016
131241000	21	0.021
132006000	18	0.018
132104000	8	0.008
132234000	5	0.005
132738000	26	0.026
132852000	15	0.015
133096000	10	0.01
133171000	8	0.008
133231000	19	0.019
133355000	4	0.004
133868000	11	0.011
133869000	10	0.01
133988000	20	0.02
134159000	13	0.013
134354000	9	0.009
134911000	73	0.073
135003000	12	0.012
135086000	17	0.017
135214000	23	0.023
135268000	20	0.02
135389000	24	0.024
135911000	4	0.004
135959000	13	0.013
136017000	5	0.005
136078000	27	0.027
136210000	7	0.007
136436000	7	0.007
136475000	12	0.012
136593000	6	0.006
136664000	175	0.175
136702000	5	0.005
136722000	8	0.008
137519000	19	0.019
137537000	20	0.02
137756000	16	0.016
137997000	7	0.007
138095000	6	0.006
138198000	4	0.004
138279000	16	0.016
138593000	13	0.013
139785000	24	0.024
139847000	9	0.009
140071000	25	0.025
140213000	24	0.024
140270000	9	0.009
140440000	21	0.021
140470000	15	0.015
140489000	17	0.017
140643000	11	0.011
141157000	7	0.007
141408000	24	0.024
141575000	9	0.009
141719000	10	0.01
141851000	7	0.007
141911000	3	0.003
142180000	20	0.02
142321000	10	0.01
142620000	16	0.016
142636000	16	0.016
142663000	19	0.019
142699000	11	0.011
142847000	14	0.014
143048000	13	0.013
143113000	19	0.019
143543000	22	0.022
143673000	18	0.018
144106000	15	0.015
144474000	33	0.033
145148000	42	0.042
145177000	10	0.01
145793000	14	0.014
146018000	18	0.018
146166000	36	0.036
146416000	23	0.023
146624000	28	0.028
146807000	18	0.018
146835000	27	0.027
147399000	28	0.028
148501000	16	0.016
148883000	7	0.007
148957000	17	0.017
149229000	3	0.003
149293000	10	0.01
149509000	11	0.011
149644000	4	0.004
149752000	11	0.011
149779000	13	0.013
149812000	8	0.008
150552000	15	0.015
150778000	18	0.018
150858000	14	0.014
150939000	18	0.018
151007000	11	0.011
151127000	29	0.029
151765000	4	0.004
152666000	12	0.012
152766000	12	0.012
152916000	8	0.008
152961000	16	0.016
153083000	15	0.015
153334000	15	0.015
153501000	15	0.015
153721000	24	0.024
153841000	6	0.006
154081000	15	0.015
154566000	26	0.026
154571000	19	0.019
154844000	16	0.016
155310000	18	0.018
155619000	3	0.003
155684000	12	0.012
155778000	13	0.013
155920000	9	0.009
155966000	26	0.026
156158000	15	0.015
156187000	10	0.01
156950000	9	0.009
157404000	39	0.039
157686000	24	0.024
158184000	14	0.014
158682000	26	0.026
158951000	29	0.029
158953000	33	0.033
159092000	15	0.015
159287000	21	0.021
159330000	36	0.036
159428000	28	0.028
159456000	25	0.025
159794000	24	0.024
159796000	17	0.017
160101000	9	0.009
160145000	7	0.007
160295000	11	0.011
160355000	16	0.016
160679000	28	0.028
160696000	11	0.011
161008000	17	0.017
161253000	27	0.027
161316000	12	0.012
161367000	33	0.033
161553000	43	0.043
161994000	43	0.043
162820000	31	0.031
163008000	36	0.036
163310000	37	0.037
163325000	34	0.034
163682000	25	0.025
163717000	33	0.033
163845000	23	0.023
164660000	21	0.021
164678000	25	0.025
164840000	39	0.039
164936000	22	0.022
164943000	17	0.017
165429000	21	0.021
165557000	13	0.013
165607000	15	0.015
165632000	22	0.022
165983000	28	0.028
166485000	27	0.027
166609000	30	0.03
166617000	38	0.038
166635000	47	0.047
166944000	25	0.025
167122000	19	0.019
167220000	28	0.028
167465000	9	0.009
167532000	6	0.006
167559000	17	0.017
167739000	4	0.004
167906000	12	0.012
167988000	14	0.014
168122000	29	0.029
168395000	28	0.028
169023000	20	0.02
169410000	28	0.028
169430000	29	0.029
169468000	9	0.009
170071000	9	0.009
170086000	12	0.012
170371000	15	0.015
171360000	12	0.012
171966000	9	0.009
172233000	14	0.014
172432000	15	0.015
172552000	10	0.01
172570000	25	0.025
172659000	23	0.023
172721000	22	0.022
172912000	33	0.033
172934000	23	0.023
173197000	10	0.01
173824000	17	0.017
173827000	17	0.017
173874000	9	0.009
173967000	13	0.013
174240000	9	0.009
174242000	16	0.016
174256000	17	0.017
174519000	19	0.019
174524000	19	0.019
174595000	9	0.009
174761000	9	0.009
174804000	15	0.015
174817000	21	0.021
175040000	7	0.007
175227000	30	0.03
175235000	14	0.014
175735000	10	0.01
176076000	21	0.021
176676000	9	0.009
176726000	7	0.007
176974000	4	0.004
177538000	11	0.011
177628000	13	0.013
177700000	10	0.01
177713000	17	0.017
177804000	11	0.011
178224000	11	0.011
178276000	27	0.027
178383000	16	0.016
178611000	33	0.033
178833000	19	0.019
178881000	7	0.007
178951000	154	0.154
179190000	16	0.016
179375000	15	0.015
179987000	28	0.028
180035000	29	0.029
180430000	28	0.028
180494000	35	0.035
180495000	18	0.018
181230000	24	0.024
181258000	21	0.021
181980000	13	0.013
182040000	16	0.016
182378000	25	0.025
182448000	11	0.011
182485000	12	0.012
182635000	15	0.015
182706000	9	0.009
182797000	9	0.009
183031000	10	0.01
183060000	12	0.012
183189000	11	0.011
183317000	12	0.012
183495000	9	0.009
183509000	9	0.009
183671000	9	0.009
183687000	4	0.004
183693000	16	0.016
183796000	15	0.015
183824000	321	0.321
183826000	15	0.015
183881000	22	0.022
184259000	19	0.019
184296000	13	0.013
184377000	17	0.017
184382000	18	0.018
184962000	6	0.006
185238000	12	0.012
185412000	8	0.008
185742000	10	0.01
185927000	10	0.01
186061000	9	0.009
186073000	15	0.015
186240000	13	0.013
186604000	12	0.012
186892000	12	0.012
186921000	12	0.012
187049000	19	0.019
187650000	19	0.019
187657000	10	0.01
188032000	10	0.01
188299000	37	0.037
188338000	6	0.006
188496000	6	0.006
188597000	9	0.009
188859000	16	0.016
189013000	9	0.009
189162000	12	0.012
189311000	18	0.018
189483000	28	0.028
189611000	44	0.044
189621000	25	0.025
189708000	14	0.014
189989000	19	0.019
190002000	14	0.014
190257000	5	0.005
190276000	3	0.003
190338000	97	0.097
190622000	37	0.037
190681000	28	0.028
191242000	16	0.016
191249000	29	0.029
191287000	28	0.028
191367000	41	0.041
191540000	42	0.042
191643000	36	0.036
192079000	19	0.019
192233000	20	0.02
192463000	26	0.026
192491000	25	0.025
192548000	15	0.015
192986000	25	0.025
193056000	20	0.02
193062000	24	0.024
193181000	15	0.015
193783000	5	0.005
193827000	16	0.016
193954000	12	0.012
193961000	11	0.011
194348000	4	0.004
194524000	6	0.006
194958000	15	0.015
195001000	9	0.009
195104000	14	0.014
195214000	41	0.041
195946000	5	0.005
196311000	28	0.028
196433000	3	0.003
196605000	6	0.006
196789000	6	0.006
196947000	7	0.007
197263000	3	0.003
197272000	10	0.01
197299000	17	0.017
197345000	29	0.029
197456000	11	0.011
197499000	7	0.007
197667000	10	0.01
197770000	10	0.01
197819000	15	0.015
		19.14
		0.0194908

## Sheet: chr4_output
Position	Total number of SNVs per 1000 bases	Ratio
49000	34	0.034		ps: positions are from chromoome 4
279000	19	0.019
295000	16	0.016
487000	3	0.003
611000	21	0.021
684000	13	0.013
726000	5	0.005
890000	16	0.016
906000	17	0.017
1861000	5	0.005
2000000	9	0.009
2196000	2	0.002
2347000	10	0.01
2743000	9	0.009
2965000	16	0.016
3098000	9	0.009
4130000	15	0.015
4138000	12	0.012
4625000	9	0.009
4637000	12	0.012
4678000	13	0.013
4873000	11	0.011
5195000	19	0.019
5314000	11	0.011
5493000	4	0.004
5734000	11	0.011
5894000	10	0.01
6150000	32	0.032
6244000	13	0.013
6386000	16	0.016
6809000	3	0.003
7301000	9	0.009
7332000	19	0.019
8026000	19	0.019
8167000	9	0.009
8232000	7	0.007
8329000	8	0.008
8394000	39	0.039
8831000	27	0.027
8995000	16	0.016
9085000	28	0.028
9124000	11	0.011
10281000	11	0.011
10294000	12	0.012
10778000	5	0.005
10997000	14	0.014
11408000	13	0.013
11439000	17	0.017
11617000	28	0.028
11630000	24	0.024
11977000	27	0.027
12178000	37	0.037
12184000	23	0.023
12204000	24	0.024
12683000	29	0.029
12684000	19	0.019
12747000	25	0.025
12778000	21	0.021
13033000	23	0.023
13123000	16	0.016
13160000	9	0.009
13239000	8	0.008
13245000	8	0.008
13291000	14	0.014
13375000	5	0.005
13530000	15	0.015
13742000	23	0.023
14138000	16	0.016
14195000	10	0.01
14379000	25	0.025
14698000	15	0.015
14927000	9	0.009
15252000	14	0.014
15354000	14	0.014
15555000	6	0.006
15589000	15	0.015
15705000	10	0.01
15738000	9	0.009
15886000	10	0.01
15893000	9	0.009
15999000	8	0.008
16059000	6	0.006
16173000	13	0.013
16203000	3	0.003
16415000	27	0.027
16444000	12	0.012
16673000	15	0.015
16871000	21	0.021
17445000	24	0.024
17705000	12	0.012
18057000	8	0.008
18481000	21	0.021
18670000	17	0.017
18953000	40	0.04
18965000	25	0.025
19325000	28	0.028
19532000	29	0.029
19896000	33	0.033
20798000	21	0.021
21032000	38	0.038
21046000	36	0.036
21048000	30	0.03
21096000	28	0.028
21548000	12	0.012
21596000	23	0.023
21628000	25	0.025
21759000	23	0.023
21893000	24	0.024
21958000	31	0.031
22602000	8	0.008
22702000	15	0.015
23078000	22	0.022
23087000	24	0.024
23148000	21	0.021
23198000	13	0.013
23210000	25	0.025
23239000	8	0.008
23615000	19	0.019
23692000	24	0.024
23998000	17	0.017
24188000	17	0.017
24352000	11	0.011
24399000	8	0.008
24728000	8	0.008
24821000	15	0.015
24975000	11	0.011
25014000	45	0.045
25031000	5	0.005
25261000	6	0.006
25307000	10	0.01
25582000	10	0.01
25818000	18	0.018
25869000	12	0.012
26002000	8	0.008
26109000	19	0.019
26309000	11	0.011
26738000	4	0.004
26816000	3	0.003
26887000	6	0.006
28076000	21	0.021
28403000	26	0.026
28440000	32	0.032
28825000	54	0.054
28907000	34	0.034
28935000	32	0.032
29310000	35	0.035
29768000	20	0.02
30128000	18	0.018
30143000	19	0.019
30153000	20	0.02
30396000	18	0.018
30677000	20	0.02
31055000	12	0.012
31087000	13	0.013
31150000	13	0.013
31371000	19	0.019
31421000	15	0.015
31555000	18	0.018
31594000	17	0.017
31810000	32	0.032
32283000	31	0.031
32312000	26	0.026
32511000	27	0.027
32567000	23	0.023
32649000	36	0.036
32945000	21	0.021
32974000	23	0.023
33433000	26	0.026
33511000	29	0.029
33813000	34	0.034
33920000	40	0.04
34074000	36	0.036
34452000	40	0.04
34906000	18	0.018
34933000	22	0.022
35125000	24	0.024
35193000	35	0.035
35356000	37	0.037
35370000	38	0.038
35468000	36	0.036
35556000	20	0.02
36129000	12	0.012
36130000	39	0.039
36268000	19	0.019
36273000	16	0.016
36295000	21	0.021
36573000	16	0.016
36943000	20	0.02
37089000	17	0.017
37197000	29	0.029
37208000	23	0.023
37218000	32	0.032
37248000	19	0.019
37504000	4	0.004
37519000	5	0.005
37583000	6	0.006
38302000	12	0.012
38505000	16	0.016
38610000	8	0.008
38950000	7	0.007
39051000	7	0.007
39312000	6	0.006
39690000	12	0.012
39880000	3	0.003
39940000	8	0.008
40008000	12	0.012
40145000	4	0.004
40323000	8	0.008
40435000	15	0.015
40655000	15	0.015
40740000	9	0.009
40937000	7	0.007
41029000	8	0.008
41043000	6	0.006
41252000	11	0.011
41301000	14	0.014
41304000	25	0.025
41371000	17	0.017
41503000	22	0.022
41526000	26	0.026
41838000	19	0.019
41922000	11	0.011
42073000	5	0.005
42115000	29	0.029
42564000	18	0.018
42754000	18	0.018
42841000	22	0.022
43228000	42	0.042
43326000	40	0.04
43590000	26	0.026
43665000	29	0.029
44089000	47	0.047
44103000	30	0.03
44257000	50	0.05
44437000	40	0.04
44679000	7	0.007
44900000	23	0.023
45021000	33	0.033
45140000	32	0.032
45174000	58	0.058
45761000	37	0.037
45926000	35	0.035
46037000	35	0.035
46799000	25	0.025
46806000	35	0.035
46845000	15	0.015
47264000	16	0.016
47365000	19	0.019
47936000	9	0.009
48263000	7	0.007
48302000	7	0.007
48465000	17	0.017
48530000	12	0.012
48672000	6	0.006
48833000	9	0.009
48904000	14	0.014
53085000	7	0.007
53834000	7	0.007
54013000	12	0.012
54210000	8	0.008
54616000	15	0.015
54623000	18	0.018
55137000	13	0.013
55192000	12	0.012
55235000	15	0.015
55906000	18	0.018
55975000	15	0.015
56753000	9	0.009
56830000	23	0.023
56842000	6	0.006
57322000	5	0.005
57347000	4	0.004
57953000	6	0.006
58052000	22	0.022
58213000	24	0.024
58374000	21	0.021
58390000	40	0.04
58727000	32	0.032
58887000	7	0.007
59177000	33	0.033
59260000	35	0.035
59339000	27	0.027
59395000	43	0.043
60212000	22	0.022
60289000	18	0.018
60305000	33	0.033
60526000	22	0.022
60727000	29	0.029
60804000	21	0.021
60877000	28	0.028
60893000	18	0.018
61615000	31	0.031
61638000	37	0.037
62090000	20	0.02
62098000	19	0.019
62348000	14	0.014
62392000	25	0.025
62534000	19	0.019
62555000	26	0.026
62810000	1	0.001
62913000	17	0.017
63150000	30	0.03
63255000	23	0.023
63378000	33	0.033
63933000	21	0.021
64427000	24	0.024
65519000	38	0.038
65527000	39	0.039
65947000	16	0.016
66050000	27	0.027
66101000	11	0.011
66230000	129	0.129
66479000	19	0.019
66762000	32	0.032
67503000	31	0.031
67529000	17	0.017
67655000	19	0.019
67978000	24	0.024
68993000	12	0.012
69398000	13	0.013
69569000	28	0.028
69751000	23	0.023
69993000	13	0.013
70009000	16	0.016
70121000	24	0.024
70231000	30	0.03
70232000	28	0.028
70393000	21	0.021
70499000	17	0.017
70654000	13	0.013
70781000	22	0.022
70789000	27	0.027
71072000	11	0.011
71139000	9	0.009
71553000	2	0.002
71600000	5	0.005
71918000	7	0.007
72062000	8	0.008
72076000	6	0.006
72629000	94	0.094
72826000	23	0.023
72862000	18	0.018
72986000	23	0.023
73305000	14	0.014
73355000	12	0.012
73811000	27	0.027
73890000	17	0.017
73959000	66	0.066
74007000	53	0.053
74055000	4	0.004
74315000	26	0.026
74329000	6	0.006
74583000	12	0.012
74950000	17	0.017
74980000	6	0.006
75134000	11	0.011
75321000	1	0.001
75409000	16	0.016
75521000	32	0.032
75987000	25	0.025
76036000	17	0.017
76237000	32	0.032
76348000	30	0.03
76601000	7	0.007
76675000	5	0.005
76702000	6	0.006
76730000	12	0.012
76922000	18	0.018
77030000	1	0.001
77179000	8	0.008
77381000	9	0.009
77399000	9	0.009
77437000	15	0.015
77551000	13	0.013
77603000	10	0.01
77624000	5	0.005
77710000	9	0.009
77782000	9	0.009
78059000	10	0.01
78317000	6	0.006
78318000	11	0.011
78813000	6	0.006
78847000	6	0.006
78912000	13	0.013
79181000	5	0.005
79186000	15	0.015
79232000	12	0.012
79293000	20	0.02
79303000	8	0.008
79522000	18	0.018
79755000	5	0.005
79763000	29	0.029
79768000	16	0.016
79961000	9	0.009
80258000	19	0.019
80462000	15	0.015
80612000	18	0.018
80629000	2	0.002
80699000	28	0.028
81289000	15	0.015
81459000	16	0.016
81484000	23	0.023
81531000	21	0.021
81657000	23	0.023
81693000	33	0.033
81908000	12	0.012
82077000	8	0.008
82168000	11	0.011
82399000	12	0.012
82592000	5	0.005
83016000	21	0.021
83323000	8	0.008
83490000	10	0.01
83516000	5	0.005
83646000	13	0.013
83753000	7	0.007
83836000	1	0.001
83845000	7	0.007
84620000	16	0.016
84849000	19	0.019
84892000	11	0.011
84907000	19	0.019
85126000	15	0.015
85273000	17	0.017
85618000	6	0.006
85685000	11	0.011
85710000	21	0.021
85817000	14	0.014
85922000	20	0.02
86080000	11	0.011
86273000	21	0.021
86601000	14	0.014
86680000	6	0.006
86709000	10	0.01
86730000	7	0.007
86885000	5	0.005
87003000	17	0.017
87020000	14	0.014
87414000	6	0.006
87430000	15	0.015
87484000	12	0.012
87586000	3	0.003
88174000	13	0.013
88177000	9	0.009
88250000	12	0.012
88481000	14	0.014
88751000	16	0.016
88781000	5	0.005
88869000	16	0.016
88949000	5	0.005
89133000	18	0.018
89308000	4	0.004
89327000	7	0.007
89381000	11	0.011
89476000	9	0.009
89950000	25	0.025
89964000	4	0.004
90293000	14	0.014
90339000	14	0.014
90678000	7	0.007
90768000	7	0.007
90803000	4	0.004
91126000	18	0.018
91139000	9	0.009
91221000	10	0.01
91269000	13	0.013
91516000	19	0.019
91520000	24	0.024
91736000	23	0.023
91767000	18	0.018
92118000	21	0.021
92220000	23	0.023
92250000	23	0.023
92611000	35	0.035
92797000	33	0.033
92998000	19	0.019
93279000	29	0.029
93323000	33	0.033
93351000	27	0.027
93447000	46	0.046
93759000	18	0.018
94130000	31	0.031
94172000	38	0.038
94176000	26	0.026
94372000	31	0.031
94436000	152	0.152
94547000	113	0.113
94714000	14	0.014
95080000	9	0.009
95171000	16	0.016
95376000	52	0.052
95623000	5	0.005
95727000	4	0.004
95878000	13	0.013
96424000	16	0.016
96528000	20	0.02
96549000	17	0.017
96772000	13	0.013
96797000	20	0.02
96823000	14	0.014
97098000	21	0.021
97119000	26	0.026
97317000	22	0.022
97583000	21	0.021
97685000	31	0.031
98647000	17	0.017
98713000	26	0.026
98787000	10	0.01
98863000	21	0.021
99041000	23	0.023
99115000	25	0.025
99228000	3	0.003
99343000	3	0.003
99690000	6	0.006
99738000	17	0.017
99880000	6	0.006
100203000	43	0.043
100515000	22	0.022
100850000	9	0.009
101404000	22	0.022
101406000	16	0.016
101529000	26	0.026
101583000	18	0.018
101841000	19	0.019
101939000	9	0.009
102040000	7	0.007
102142000	4	0.004
102268000	8	0.008
102458000	22	0.022
102513000	13	0.013
102783000	51	0.051
102833000	9	0.009
102848000	9	0.009
102931000	9	0.009
102987000	9	0.009
103029000	24	0.024
103137000	11	0.011
103241000	9	0.009
103703000	6	0.006
103715000	17	0.017
104112000	16	0.016
104124000	18	0.018
104371000	16	0.016
104447000	30	0.03
104898000	38	0.038
105107000	22	0.022
105164000	24	0.024
105400000	15	0.015
105449000	18	0.018
106395000	67	0.067
106620000	5	0.005
106704000	5	0.005
107168000	38	0.038
107494000	2	0.002
107583000	22	0.022
108124000	29	0.029
108504000	19	0.019
108686000	12	0.012
108740000	4	0.004
108944000	15	0.015
109125000	9	0.009
109145000	11	0.011
109343000	11	0.011
109588000	10	0.01
109721000	7	0.007
109883000	14	0.014
109960000	10	0.01
110156000	13	0.013
110230000	14	0.014
110345000	9	0.009
110532000	8	0.008
110816000	6	0.006
110977000	3	0.003
111038000	9	0.009
111276000	27	0.027
111608000	26	0.026
111625000	27	0.027
111780000	22	0.022
111867000	15	0.015
112170000	15	0.015
112216000	36	0.036
112529000	27	0.027
112606000	14	0.014
113112000	13	0.013
113233000	9	0.009
113237000	6	0.006
113404000	14	0.014
113421000	17	0.017
113549000	8	0.008
113850000	18	0.018
114187000	12	0.012
114321000	10	0.01
115406000	10	0.01
115693000	14	0.014
116186000	31	0.031
116217000	32	0.032
116665000	37	0.037
116756000	46	0.046
116776000	31	0.031
117091000	23	0.023
117103000	32	0.032
117107000	36	0.036
117309000	22	0.022
117389000	35	0.035
117723000	48	0.048
117732000	30	0.03
117961000	40	0.04
118258000	22	0.022
118316000	26	0.026
118358000	34	0.034
118395000	31	0.031
118464000	22	0.022
118864000	29	0.029
119010000	15	0.015
119115000	12	0.012
119494000	18	0.018
119527000	9	0.009
119554000	19	0.019
119669000	10	0.01
119907000	4	0.004
120832000	30	0.03
120935000	14	0.014
121233000	21	0.021
121235000	24	0.024
121401000	29	0.029
121493000	25	0.025
121730000	12	0.012
121989000	8	0.008
122104000	19	0.019
122337000	25	0.025
122450000	21	0.021
123029000	20	0.02
123035000	11	0.011
123203000	6	0.006
123231000	2	0.002
123566000	19	0.019
123822000	14	0.014
123886000	7	0.007
124061000	11	0.011
124652000	14	0.014
125124000	13	0.013
125164000	14	0.014
125218000	14	0.014
125555000	8	0.008
125601000	9	0.009
125957000	25	0.025
126031000	14	0.014
126057000	16	0.016
126193000	13	0.013
126247000	12	0.012
126322000	27	0.027
126657000	27	0.027
126723000	27	0.027
127021000	19	0.019
127199000	24	0.024
127201000	38	0.038
127260000	31	0.031
127274000	26	0.026
127327000	34	0.034
127496000	23	0.023
127635000	18	0.018
127644000	36	0.036
127972000	27	0.027
128471000	19	0.019
128490000	12	0.012
128643000	14	0.014
129129000	6	0.006
129413000	6	0.006
129458000	8	0.008
129529000	10	0.01
129784000	4	0.004
129792000	179	0.179
129808000	9	0.009
130323000	18	0.018
130516000	19	0.019
130650000	20	0.02
130655000	20	0.02
130694000	17	0.017
130777000	13	0.013
130922000	22	0.022
131086000	26	0.026
131280000	19	0.019
131309000	30	0.03
131651000	26	0.026
132507000	16	0.016
132639000	16	0.016
133040000	46	0.046
133051000	22	0.022
133127000	19	0.019
133194000	35	0.035
133483000	26	0.026
133544000	23	0.023
133583000	22	0.022
133591000	29	0.029
133740000	35	0.035
133872000	30	0.03
133886000	34	0.034
134052000	22	0.022
134371000	29	0.029
134907000	30	0.03
135011000	28	0.028
135131000	18	0.018
135169000	34	0.034
135258000	26	0.026
135403000	42	0.042
135430000	41	0.041
135450000	45	0.045
135549000	24	0.024
135722000	36	0.036
135845000	38	0.038
135874000	47	0.047
135953000	40	0.04
136085000	30	0.03
136193000	37	0.037
136286000	37	0.037
136315000	30	0.03
136329000	36	0.036
136720000	41	0.041
137117000	27	0.027
137138000	23	0.023
137148000	35	0.035
137552000	38	0.038
137837000	34	0.034
138318000	36	0.036
138768000	23	0.023
138797000	16	0.016
138887000	26	0.026
139078000	17	0.017
139406000	19	0.019
139425000	24	0.024
139622000	19	0.019
139807000	16	0.016
139820000	11	0.011
139892000	10	0.01
140353000	3	0.003
140424000	5	0.005
140594000	6	0.006
140856000	7	0.007
140936000	8	0.008
141674000	16	0.016
141801000	9	0.009
142044000	17	0.017
142543000	17	0.017
142554000	11	0.011
142636000	6	0.006
142803000	5	0.005
143005000	5	0.005
143018000	13	0.013
143115000	7	0.007
143219000	9	0.009
144373000	5	0.005
144418000	11	0.011
144462000	7	0.007
145070000	7	0.007
145087000	21	0.021
145157000	38	0.038
145221000	26	0.026
145242000	28	0.028
145337000	25	0.025
145361000	26	0.026
145555000	12	0.012
145740000	26	0.026
145901000	12	0.012
146946000	29	0.029
147050000	22	0.022
147179000	15	0.015
147349000	8	0.008
147378000	6	0.006
147836000	14	0.014
148120000	21	0.021
148124000	19	0.019
148167000	33	0.033
148714000	10	0.01
148832000	11	0.011
148914000	5	0.005
149008000	10	0.01
149050000	10	0.01
149421000	20	0.02
149597000	20	0.02
150152000	15	0.015
150332000	9	0.009
150407000	16	0.016
150505000	10	0.01
150586000	19	0.019
150924000	7	0.007
151214000	7	0.007
151390000	9	0.009
151519000	7	0.007
151549000	13	0.013
151606000	5	0.005
151735000	5	0.005
151800000	6	0.006
151974000	11	0.011
152241000	7	0.007
152242000	6	0.006
152920000	15	0.015
153065000	9	0.009
153114000	16	0.016
153252000	12	0.012
153301000	2	0.002
153467000	12	0.012
153604000	4	0.004
153816000	6	0.006
153819000	6	0.006
153976000	9	0.009
154180000	6	0.006
154548000	21	0.021
154643000	11	0.011
154655000	10	0.01
155081000	16	0.016
155303000	22	0.022
155414000	14	0.014
155592000	19	0.019
155799000	34	0.034
155819000	11	0.011
155928000	31	0.031
156207000	36	0.036
156342000	26	0.026
156612000	24	0.024
156730000	8	0.008
157042000	20	0.02
157074000	23	0.023
157295000	17	0.017
157511000	23	0.023
157666000	21	0.021
157680000	14	0.014
158649000	27	0.027
158840000	21	0.021
158980000	10	0.01
159046000	7	0.007
159597000	6	0.006
159664000	7	0.007
159671000	9	0.009
159973000	9	0.009
160016000	17	0.017
160362000	13	0.013
160365000	18	0.018
160471000	43	0.043
160778000	30	0.03
160783000	17	0.017
161103000	24	0.024
161300000	27	0.027
161319000	24	0.024
162475000	30	0.03
162625000	22	0.022
162929000	22	0.022
162985000	19	0.019
163335000	21	0.021
163453000	28	0.028
163631000	55	0.055
163799000	34	0.034
163915000	16	0.016
163963000	26	0.026
163977000	32	0.032
164065000	5	0.005
164195000	44	0.044
164419000	6	0.006
164671000	29	0.029
164870000	27	0.027
165188000	19	0.019
165212000	18	0.018
166006000	12	0.012
166055000	14	0.014
166142000	12	0.012
166174000	13	0.013
166238000	32	0.032
166510000	34	0.034
166574000	26	0.026
166588000	31	0.031
166607000	35	0.035
166743000	16	0.016
166746000	33	0.033
166875000	28	0.028
166891000	34	0.034
167008000	20	0.02
167351000	21	0.021
167440000	25	0.025
167454000	29	0.029
167553000	24	0.024
167599000	22	0.022
167804000	20	0.02
167821000	19	0.019
168170000	26	0.026
168187000	26	0.026
168262000	22	0.022
168295000	29	0.029
168454000	43	0.043
168669000	36	0.036
168832000	31	0.031
168986000	27	0.027
169268000	9	0.009
169291000	11	0.011
169734000	11	0.011
169771000	7	0.007
169970000	9	0.009
170017000	37	0.037
170238000	9	0.009
170502000	8	0.008
170715000	10	0.01
171033000	8	0.008
171118000	18	0.018
171245000	20	0.02
171329000	14	0.014
171339000	18	0.018
171465000	34	0.034
171861000	39	0.039
172742000	19	0.019
172865000	24	0.024
173278000	24	0.024
174125000	7	0.007
174424000	7	0.007
175091000	24	0.024
175387000	10	0.01
175699000	33	0.033
175812000	30	0.03
175887000	30	0.03
176118000	34	0.034
176268000	27	0.027
176500000	25	0.025
176715000	28	0.028
177108000	16	0.016
177367000	26	0.026
178201000	10	0.01
178249000	7	0.007
178313000	8	0.008
178480000	15	0.015
178772000	33	0.033
179137000	18	0.018
179292000	35	0.035
179532000	26	0.026
179947000	25	0.025
180129000	25	0.025
180191000	22	0.022
180345000	31	0.031
180435000	18	0.018
180687000	31	0.031
180702000	23	0.023
180799000	13	0.013
181155000	26	0.026
181732000	15	0.015
181915000	35	0.035
181988000	30	0.03
182001000	10	0.01
182332000	9	0.009
182344000	31	0.031
182813000	22	0.022
182936000	38	0.038
183269000	26	0.026
183738000	11	0.011
183878000	16	0.016
184113000	7	0.007
184386000	6	0.006
184716000	10	0.01
185023000	12	0.012
185031000	13	0.013
185090000	12	0.012
185108000	16	0.016
185174000	16	0.016
186071000	5	0.005
186215000	7	0.007
186261000	3	0.003
186570000	111	0.111
186608000	7	0.007
186636000	7	0.007
186648000	7	0.007
186694000	5	0.005
186798000	4	0.004
186888000	12	0.012
187143000	14	0.014
187252000	25	0.025
187433000	29	0.029
187626000	7	0.007
187818000	21	0.021
188070000	21	0.021
188447000	23	0.023
189057000	28	0.028
189235000	29	0.029
189718000	28	0.028
190459000	31	0.031
190608000	40	0.04
		18.951
		0.0193378

## Sheet: chr5_output
Position	Total number of SNVs per 1000 bases	Ratio
67000	17	0.017
100000	21	0.021		ps: positions are from chromoome 5
150000	9	0.009
336000	3	0.003
483000	61	0.061
523000	7	0.007
861000	6	0.006
913000	8	0.008
1142000	9	0.009
1176000	9	0.009
1221000	78	0.078
1244000	84	0.084
1357000	16	0.016
1375000	13	0.013
1453000	15	0.015
1731000	29	0.029
1769000	26	0.026
1837000	21	0.021
1887000	12	0.012
1996000	34	0.034
2008000	34	0.034
2216000	40	0.04
2242000	30	0.03
2243000	36	0.036
2253000	31	0.031
2418000	60	0.06
2458000	47	0.047
2687000	45	0.045
2755000	33	0.033
2812000	36	0.036
2846000	34	0.034
2897000	49	0.049
3085000	29	0.029
3478000	28	0.028
3559000	30	0.03
3713000	39	0.039
3749000	42	0.042
4165000	35	0.035
4338000	26	0.026
4362000	34	0.034
4662000	35	0.035
4738000	32	0.032
4877000	25	0.025
5180000	26	0.026
5222000	28	0.028
5768000	36	0.036
5894000	33	0.033
5962000	46	0.046
6232000	34	0.034
6695000	23	0.023
6746000	104	0.104
7038000	31	0.031
7372000	15	0.015
7477000	10	0.01
7806000	16	0.016
8011000	31	0.031
8029000	22	0.022
8090000	31	0.031
8406000	29	0.029
8504000	22	0.022
8714000	19	0.019
9097000	16	0.016
9126000	18	0.018
9339000	17	0.017
9455000	28	0.028
9666000	31	0.031
9675000	24	0.024
10017000	23	0.023
10602000	13	0.013
10680000	5	0.005
10726000	8	0.008
11048000	23	0.023
11243000	13	0.013
11875000	34	0.034
11927000	41	0.041
12135000	48	0.048
12212000	37	0.037
12668000	45	0.045
13239000	40	0.04
13341000	41	0.041
13377000	39	0.039
13422000	10	0.01
14142000	6	0.006
14503000	13	0.013
14570000	15	0.015
14781000	23	0.023
15033000	17	0.017
15235000	20	0.02
15510000	16	0.016
15572000	11	0.011
15622000	24	0.024
15792000	20	0.02
15828000	18	0.018
16017000	31	0.031
16091000	55	0.055
16215000	32	0.032
16230000	37	0.037
16870000	5	0.005
17034000	10	0.01
17202000	17	0.017
17266000	19	0.019
17418000	16	0.016
17652000	16	0.016
17969000	30	0.03
18031000	27	0.027
18194000	37	0.037
18286000	20	0.02
18311000	14	0.014
18390000	26	0.026
18838000	20	0.02
18839000	25	0.025
19624000	32	0.032
19825000	35	0.035
19935000	25	0.025
20003000	44	0.044
20147000	30	0.03
20235000	34	0.034
20628000	36	0.036
20647000	35	0.035
20687000	45	0.045
20697000	19	0.019
20758000	21	0.021
20771000	13	0.013
20953000	16	0.016
21262000	19	0.019
21500000	8	0.008
21605000	21	0.021
21786000	30	0.03
21974000	21	0.021
22435000	35	0.035
22510000	21	0.021
23093000	40	0.04
23429000	31	0.031
23791000	25	0.025
24279000	30	0.03
24578000	31	0.031
24677000	34	0.034
25161000	58	0.058
25215000	37	0.037
25430000	25	0.025
25617000	45	0.045
25705000	31	0.031
26121000	35	0.035
26196000	36	0.036
26215000	37	0.037
26631000	38	0.038
26721000	48	0.048
26886000	92	0.092
27037000	38	0.038
27117000	37	0.037
27662000	42	0.042
27699000	32	0.032
28027000	57	0.057
28039000	32	0.032
28215000	42	0.042
28386000	41	0.041
28504000	12	0.012
28664000	36	0.036
28695000	41	0.041
28729000	28	0.028
28799000	30	0.03
29057000	38	0.038
29077000	26	0.026
29109000	35	0.035
29154000	28	0.028
29496000	43	0.043
29656000	31	0.031
29775000	34	0.034
30137000	34	0.034
30276000	52	0.052
30440000	40	0.04
30474000	53	0.053
30537000	39	0.039
30687000	49	0.049
30706000	31	0.031
30738000	36	0.036
30874000	37	0.037
30913000	35	0.035
30970000	20	0.02
30973000	32	0.032
31035000	23	0.023
31123000	12	0.012
31790000	13	0.013
32054000	8	0.008
32071000	21	0.021
32191000	10	0.01
32206000	9	0.009
32420000	21	0.021
32440000	4	0.004
32530000	17	0.017
32809000	21	0.021
33067000	29	0.029
33192000	25	0.025
33216000	21	0.021
33243000	20	0.02
33253000	22	0.022
33476000	6	0.006
33922000	25	0.025
33964000	68	0.068
34425000	26	0.026
34800000	7	0.007
34908000	13	0.013
34933000	18	0.018
35410000	24	0.024
35977000	25	0.025
36155000	13	0.013
36191000	6	0.006
36203000	10	0.01
36280000	7	0.007
36544000	20	0.02
36710000	12	0.012
36945000	12	0.012
37068000	6	0.006
37090000	11	0.011
37123000	9	0.009
37149000	13	0.013
37509000	6	0.006
37516000	18	0.018
37922000	30	0.03
37947000	12	0.012
38290000	45	0.045
38869000	70	0.07
39203000	89	0.089
39340000	23	0.023
39349000	19	0.019
39469000	11	0.011
39481000	17	0.017
39618000	17	0.017
39659000	9	0.009
40348000	18	0.018
40573000	19	0.019
40633000	19	0.019
40645000	19	0.019
40945000	54	0.054
41121000	30	0.03
41247000	27	0.027
41386000	37	0.037
41681000	21	0.021
41896000	5	0.005
42152000	49	0.049
42227000	51	0.051
42421000	29	0.029
43026000	7	0.007
43128000	6	0.006
43229000	11	0.011
43479000	6	0.006
43540000	6	0.006
43648000	9	0.009
43704000	31	0.031
43740000	17	0.017
43949000	13	0.013
44017000	25	0.025
44485000	28	0.028
44732000	18	0.018
44912000	21	0.021
44914000	26	0.026
44987000	58	0.058
45033000	22	0.022
45084000	27	0.027
45143000	37	0.037
45394000	35	0.035
45844000	38	0.038
46008000	44	0.044
46054000	33	0.033
46057000	43	0.043
46232000	49	0.049
46352000	45	0.045
49753000	36	0.036
49871000	8	0.008
49885000	18	0.018
49929000	22	0.022
50027000	15	0.015
50066000	12	0.012
50486000	28	0.028
50699000	29	0.029
50992000	26	0.026
51537000	19	0.019
51607000	26	0.026
51911000	19	0.019
51977000	25	0.025
52071000	14	0.014
52236000	17	0.017
52298000	10	0.01
52344000	34	0.034
52586000	23	0.023
52603000	13	0.013
52682000	16	0.016
52684000	16	0.016
52710000	7	0.007
53124000	18	0.018
53271000	6	0.006
53371000	9	0.009
53679000	10	0.01
54104000	14	0.014
54359000	17	0.017
54436000	78	0.078
54569000	9	0.009
54618000	37	0.037
54740000	6	0.006
54781000	15	0.015
54822000	12	0.012
54927000	4	0.004
54970000	21	0.021
55017000	6	0.006
55745000	6	0.006
55906000	5	0.005
56055000	9	0.009
56200000	7	0.007
56530000	6	0.006
56741000	13	0.013
56825000	16	0.016
56873000	9	0.009
57051000	9	0.009
57147000	7	0.007
57151000	10	0.01
57630000	15	0.015
57650000	9	0.009
57726000	8	0.008
57784000	12	0.012
57852000	11	0.011
57890000	15	0.015
57951000	13	0.013
57952000	12	0.012
58125000	8	0.008
58351000	8	0.008
58372000	13	0.013
58660000	6	0.006
58723000	9	0.009
59065000	6	0.006
59416000	11	0.011
59513000	12	0.012
59552000	9	0.009
60345000	4	0.004
60385000	6	0.006
61070000	13	0.013
61256000	19	0.019
61423000	28	0.028
61838000	7	0.007
62806000	39	0.039
63078000	26	0.026
63207000	27	0.027
63402000	37	0.037
63418000	27	0.027
63449000	27	0.027
63661000	25	0.025
63680000	18	0.018
63764000	1	0.001
63955000	14	0.014
64322000	7	0.007
64399000	10	0.01
64573000	28	0.028
65158000	10	0.01
65655000	17	0.017
66208000	13	0.013
66277000	16	0.016
66314000	7	0.007
66491000	7	0.007
66854000	14	0.014
67582000	10	0.01
67881000	17	0.017
68372000	16	0.016
68658000	5	0.005
68695000	112	0.112
70333000	1	0.001
70479000	5	0.005
70829000	4	0.004
70843000	7	0.007
71273000	17	0.017
71424000	7	0.007
71594000	5	0.005
71810000	9	0.009
71878000	6	0.006
71936000	8	0.008
71952000	6	0.006
72282000	11	0.011
72864000	61	0.061
73072000	54	0.054
73518000	16	0.016
73650000	12	0.012
73724000	11	0.011
73763000	11	0.011
73950000	7	0.007
73991000	5	0.005
74052000	9	0.009
74257000	10	0.01
74347000	6	0.006
74355000	13	0.013
74537000	11	0.011
74896000	7	0.007
75047000	15	0.015
75694000	16	0.016
75871000	31	0.031
76031000	6	0.006
76084000	9	0.009
76149000	8	0.008
76239000	19	0.019
76482000	12	0.012
76735000	7	0.007
77202000	16	0.016
77576000	3	0.003
77776000	6	0.006
78192000	7	0.007
78306000	14	0.014
78369000	13	0.013
78466000	10	0.01
79034000	97	0.097
79103000	8	0.008
79380000	6	0.006
79514000	6	0.006
79754000	6	0.006
79897000	8	0.008
79987000	17	0.017
80058000	13	0.013
80593000	6	0.006
81185000	15	0.015
81257000	15	0.015
81347000	6	0.006
81486000	8	0.008
81516000	7	0.007
81522000	9	0.009
81599000	4	0.004
81685000	16	0.016
81763000	15	0.015
81802000	9	0.009
81838000	16	0.016
81940000	12	0.012
82012000	17	0.017
82076000	16	0.016
82540000	3	0.003
83041000	17	0.017
83124000	15	0.015
83272000	21	0.021
83361000	22	0.022
83410000	17	0.017
83564000	28	0.028
83722000	19	0.019
83759000	23	0.023
84153000	22	0.022
84303000	31	0.031
84463000	29	0.029
84482000	25	0.025
84546000	30	0.03
84865000	38	0.038
85021000	31	0.031
85114000	29	0.029
85449000	30	0.03
85489000	21	0.021
85714000	16	0.016
86016000	23	0.023
86283000	16	0.016
86579000	5	0.005
86788000	29	0.029
87135000	23	0.023
87249000	25	0.025
87414000	16	0.016
87602000	24	0.024
87664000	27	0.027
87838000	21	0.021
88550000	18	0.018
89711000	10	0.01
90257000	14	0.014
90324000	8	0.008
90341000	9	0.009
90519000	16	0.016
91234000	25	0.025
91413000	14	0.014
91431000	32	0.032
91476000	24	0.024
91601000	12	0.012
91850000	21	0.021
92102000	15	0.015
92210000	18	0.018
92276000	12	0.012
92434000	19	0.019
92540000	18	0.018
92545000	18	0.018
92637000	9	0.009
93275000	8	0.008
93481000	18	0.018
93493000	6	0.006
93761000	9	0.009
93843000	10	0.01
93897000	9	0.009
94208000	29	0.029
94294000	28	0.028
94308000	23	0.023
94412000	22	0.022
94638000	22	0.022
94657000	17	0.017
94987000	6	0.006
95009000	2	0.002
95046000	12	0.012
95189000	10	0.01
95388000	7	0.007
95393000	7	0.007
95409000	9	0.009
95760000	15	0.015
96122000	31	0.031
96201000	5	0.005
96231000	13	0.013
96290000	19	0.019
96441000	15	0.015
96824000	18	0.018
96866000	10	0.01
96957000	18	0.018
97197000	15	0.015
97532000	24	0.024
97640000	20	0.02
97672000	17	0.017
98027000	13	0.013
98139000	5	0.005
98561000	27	0.027
98743000	14	0.014
98744000	11	0.011
98970000	23	0.023
99202000	16	0.016
99703000	19	0.019
99808000	12	0.012
100446000	17	0.017
100482000	27	0.027
100797000	32	0.032
101373000	15	0.015
101403000	21	0.021
101596000	20	0.02
101775000	29	0.029
101969000	37	0.037
102177000	10	0.01
102352000	10	0.01
102509000	30	0.03
102912000	7	0.007
102993000	16	0.016
103256000	22	0.022
103803000	20	0.02
104340000	27	0.027
104510000	24	0.024
104704000	28	0.028
104933000	32	0.032
104989000	30	0.03
104993000	25	0.025
105105000	22	0.022
105108000	27	0.027
105313000	33	0.033
105418000	29	0.029
105491000	27	0.027
106163000	38	0.038
106364000	19	0.019
106562000	16	0.016
106832000	18	0.018
106923000	8	0.008
106932000	11	0.011
107047000	18	0.018
107089000	22	0.022
107488000	6	0.006
107539000	5	0.005
107587000	7	0.007
107593000	7	0.007
107779000	12	0.012
108315000	10	0.01
108408000	6	0.006
108482000	7	0.007
108523000	19	0.019
108600000	2	0.002
108772000	12	0.012
108804000	10	0.01
108855000	11	0.011
109040000	6	0.006
109085000	6	0.006
109135000	8	0.008
109184000	9	0.009
109253000	15	0.015
109345000	16	0.016
109414000	21	0.021
109493000	19	0.019
109530000	26	0.026
109575000	19	0.019
109617000	20	0.02
109835000	32	0.032
110038000	16	0.016
110307000	23	0.023
110342000	31	0.031
110495000	12	0.012
110657000	16	0.016
110691000	14	0.014
110712000	53	0.053
110733000	14	0.014
110990000	24	0.024
111237000	30	0.03
111245000	21	0.021
111250000	33	0.033
111959000	13	0.013
112311000	8	0.008
112485000	7	0.007
112588000	8	0.008
112608000	7	0.007
113094000	22	0.022
113264000	34	0.034
113270000	31	0.031
113544000	30	0.03
113579000	23	0.023
113907000	32	0.032
114131000	13	0.013
114228000	34	0.034
114242000	42	0.042
114286000	33	0.033
114340000	32	0.032
114706000	11	0.011
115214000	13	0.013
115367000	6	0.006
115383000	10	0.01
115407000	16	0.016
115434000	6	0.006
115584000	8	0.008
115611000	11	0.011
116286000	12	0.012
116478000	24	0.024
116759000	23	0.023
116869000	28	0.028
117087000	29	0.029
117138000	18	0.018
117543000	23	0.023
117844000	9	0.009
117912000	24	0.024
117950000	10	0.01
117981000	13	0.013
117999000	11	0.011
118062000	11	0.011
118884000	13	0.013
119320000	27	0.027
119368000	33	0.033
119435000	18	0.018
119494000	21	0.021
119692000	22	0.022
119706000	27	0.027
119714000	33	0.033
119796000	17	0.017
119854000	27	0.027
119891000	31	0.031
120036000	20	0.02
120162000	20	0.02
120228000	23	0.023
120248000	26	0.026
120634000	17	0.017
120887000	26	0.026
121030000	20	0.02
121272000	14	0.014
121358000	10	0.01
121528000	23	0.023
121896000	22	0.022
122303000	14	0.014
122568000	14	0.014
123009000	13	0.013
123381000	18	0.018
123578000	13	0.013
123773000	18	0.018
123886000	15	0.015
124039000	1	0.001
124221000	8	0.008
124298000	15	0.015
124358000	11	0.011
124529000	7	0.007
124677000	9	0.009
124833000	14	0.014
124851000	8	0.008
124909000	11	0.011
125114000	9	0.009
125330000	6	0.006
125359000	8	0.008
125513000	19	0.019
126122000	4	0.004
126141000	15	0.015
126525000	16	0.016
126776000	45	0.045
126788000	11	0.011
126827000	12	0.012
127062000	14	0.014
127097000	5	0.005
127346000	7	0.007
127375000	9	0.009
127592000	16	0.016
128016000	23	0.023
128345000	21	0.021
128420000	20	0.02
128563000	17	0.017
128588000	21	0.021
128827000	17	0.017
128949000	20	0.02
129284000	10	0.01
129336000	20	0.02
129615000	24	0.024
129731000	18	0.018
129812000	14	0.014
129927000	26	0.026
130005000	24	0.024
130059000	20	0.02
130292000	17	0.017
130399000	14	0.014
131409000	25	0.025
131560000	14	0.014
131870000	7	0.007
132021000	6	0.006
132106000	3	0.003
132590000	17	0.017
132796000	5	0.005
133065000	15	0.015
133375000	17	0.017
133685000	13	0.013
133935000	8	0.008
133952000	5	0.005
134028000	17	0.017
134140000	2	0.002
134330000	14	0.014
134433000	16	0.016
134492000	18	0.018
134619000	16	0.016
134711000	8	0.008
135206000	15	0.015
135386000	8	0.008
135882000	22	0.022
136085000	22	0.022
136127000	16	0.016
136293000	23	0.023
136359000	12	0.012
136646000	12	0.012
137452000	6	0.006
137494000	3	0.003
137659000	4	0.004
137773000	12	0.012
138072000	16	0.016
138201000	9	0.009
138240000	96	0.096
138321000	5	0.005
138371000	13	0.013
138578000	11	0.011
139117000	10	0.01
139402000	3	0.003
139612000	7	0.007
139642000	3	0.003
140121000	18	0.018
140168000	156	0.156
140239000	25	0.025
140259000	30	0.03
140433000	120	0.12
140597000	24	0.024
140759000	9	0.009
140998000	6	0.006
141047000	4	0.004
141247000	9	0.009
141365000	4	0.004
141371000	6	0.006
141446000	9	0.009
141551000	6	0.006
141641000	7	0.007
142279000	9	0.009
142338000	8	0.008
142727000	7	0.007
142852000	18	0.018
142853000	5	0.005
143081000	12	0.012
143117000	12	0.012
143278000	11	0.011
143295000	13	0.013
143501000	18	0.018
143653000	21	0.021
143717000	40	0.04
143836000	30	0.03
143954000	29	0.029
144085000	25	0.025
144272000	29	0.029
144434000	20	0.02
144538000	20	0.02
144594000	20	0.02
144606000	17	0.017
144737000	25	0.025
144894000	10	0.01
145154000	4	0.004
145224000	9	0.009
145291000	20	0.02
145330000	16	0.016
145463000	5	0.005
146043000	9	0.009
146084000	14	0.014
146645000	14	0.014
147796000	64	0.064
148232000	8	0.008
148486000	11	0.011
148666000	5	0.005
148901000	7	0.007
149054000	7	0.007
149183000	6	0.006
149329000	13	0.013
149486000	12	0.012
149777000	54	0.054
150009000	4	0.004
150063000	4	0.004
150066000	4	0.004
150202000	12	0.012
150278000	60	0.06
150674000	13	0.013
150840000	13	0.013
150860000	3	0.003
150995000	7	0.007
151216000	16	0.016
151279000	28	0.028
151281000	12	0.012
151428000	28	0.028
151440000	25	0.025
152696000	34	0.034
152813000	33	0.033
152926000	25	0.025
152949000	12	0.012
153085000	483	0.483
153296000	23	0.023
153462000	12	0.012
153505000	19	0.019
153577000	8	0.008
153724000	8	0.008
153851000	7	0.007
154047000	6	0.006
154693000	35	0.035
154825000	25	0.025
154912000	24	0.024
155116000	16	0.016
155192000	19	0.019
155305000	22	0.022
156258000	7	0.007
156513000	18	0.018
156737000	15	0.015
156774000	13	0.013
156924000	22	0.022
157173000	4	0.004
157250000	10	0.01
157740000	25	0.025
158249000	34	0.034
158386000	15	0.015
158400000	15	0.015
158533000	7	0.007
158540000	10	0.01
158647000	8	0.008
158838000	14	0.014
159076000	25	0.025
159520000	179	0.179
159532000	4	0.004
159983000	12	0.012
160156000	19	0.019
160233000	10	0.01
160470000	30	0.03
160494000	21	0.021
160845000	27	0.027
161165000	28	0.028
161256000	33	0.033
161281000	132	0.132
161439000	34	0.034
161713000	13	0.013
161858000	16	0.016
161920000	23	0.023
162057000	29	0.029
162165000	16	0.016
162392000	18	0.018
162513000	22	0.022
163036000	15	0.015
163101000	17	0.017
163112000	27	0.027
163348000	21	0.021
163454000	20	0.02
163592000	23	0.023
163661000	18	0.018
163680000	41	0.041
164086000	21	0.021
164149000	19	0.019
164373000	25	0.025
164406000	27	0.027
164622000	22	0.022
165237000	29	0.029
165285000	21	0.021
165322000	29	0.029
166044000	37	0.037
166482000	16	0.016
166507000	19	0.019
166534000	24	0.024
166810000	27	0.027
166818000	36	0.036
167025000	25	0.025
167037000	39	0.039
167566000	10	0.01
167749000	7	0.007
167828000	7	0.007
167897000	13	0.013
167920000	18	0.018
168032000	11	0.011
168375000	11	0.011
168499000	16	0.016
168540000	22	0.022
168576000	17	0.017
168619000	20	0.02
168638000	23	0.023
168897000	33	0.033
168918000	34	0.034
169243000	20	0.02
169247000	25	0.025
169384000	16	0.016
169394000	15	0.015
169500000	16	0.016
169570000	12	0.012
169585000	24	0.024
169811000	28	0.028
170331000	12	0.012
170902000	18	0.018
171325000	7	0.007
171583000	22	0.022
171696000	3	0.003
171750000	14	0.014
171903000	7	0.007
172241000	4	0.004
172455000	3	0.003
172583000	9	0.009
172914000	7	0.007
173010000	6	0.006
173013000	13	0.013
173039000	3	0.003
173179000	6	0.006
173472000	6	0.006
173865000	26	0.026
174095000	12	0.012
174156000	76	0.076
174454000	6	0.006
174607000	11	0.011
174688000	21	0.021
174732000	16	0.016
174749000	20	0.02
174954000	11	0.011
175028000	13	0.013
175323000	9	0.009
175389000	5	0.005
175437000	24	0.024
175528000	19	0.019
175693000	8	0.008
175719000	7	0.007
175784000	5	0.005
176277000	15	0.015
176534000	10	0.01
176661000	3	0.003
176753000	13	0.013
176766000	6	0.006
176799000	14	0.014
176844000	8	0.008
176898000	2	0.002
176959000	6	0.006
177048000	5	0.005
177385000	17	0.017
177651000	35	0.035
177652000	12	0.012
177763000	11	0.011
178325000	14	0.014
178414000	28	0.028
178491000	13	0.013
178608000	29	0.029
178700000	23	0.023
178812000	19	0.019
178937000	17	0.017
178980000	9	0.009
179076000	10	0.01
179389000	8	0.008
179686000	17	0.017
179857000	12	0.012
179862000	15	0.015
180139000	23	0.023
180221000	2	0.002
180317000	21	0.021
180560000	12	0.012
180681000	3	0.003
180695000	5	0.005
		20.164
		0.0207662

## Sheet: chr6_output
Position	Total number of SNVs per 1000 bases	Ratio
374000	37	0.037
397000	84	0.084		ps: positions are from chromoome 6
457000	8	0.008
475000	6	0.006
658000	7	0.007
662000	8	0.008
834000	17	0.017
900000	9	0.009
1164000	9	0.009
1224000	9	0.009
1450000	11	0.011
1561000	9	0.009
1565000	6	0.006
1831000	7	0.007
1864000	4	0.004
2046000	4	0.004
2607000	13	0.013
2623000	83	0.083
2667000	18	0.018
3011000	1	0.001
3210000	3	0.003
3225000	47	0.047
3539000	10	0.01
3880000	13	0.013
4389000	2	0.002
4455000	12	0.012
4459000	12	0.012
4657000	9	0.009
4802000	7	0.007
4852000	8	0.008
4905000	9	0.009
5040000	23	0.023
5320000	5	0.005
5708000	8	0.008
5792000	14	0.014
5999000	118	0.118
6018000	15	0.015
6032000	18	0.018
6795000	14	0.014
6891000	13	0.013
7051000	15	0.015
7186000	4	0.004
7198000	8	0.008
7470000	12	0.012
7494000	12	0.012
7673000	8	0.008
7894000	6	0.006
8354000	10	0.01
8389000	12	0.012
8700000	15	0.015
8713000	16	0.016
8980000	3	0.003
9087000	9	0.009
9100000	22	0.022
9178000	23	0.023
9491000	9	0.009
9602000	21	0.021
9967000	10	0.01
10298000	7	0.007
10799000	10	0.01
11103000	19	0.019
11365000	9	0.009
11395000	9	0.009
11630000	11	0.011
11696000	11	0.011
11791000	9	0.009
11915000	8	0.008
12384000	26	0.026
12832000	9	0.009
12846000	11	0.011
13467000	5	0.005
13468000	5	0.005
13569000	17	0.017
13575000	9	0.009
14143000	4	0.004
14422000	16	0.016
14657000	9	0.009
15090000	7	0.007
15135000	14	0.014
15276000	4	0.004
15359000	10	0.01
15417000	3	0.003
15444000	7	0.007
15457000	9	0.009
15562000	2	0.002
15622000	6	0.006
15636000	3	0.003
15862000	10	0.01
16465000	8	0.008
16501000	7	0.007
16567000	8	0.008
16900000	15	0.015
16921000	13	0.013
17281000	11	0.011
17342000	15	0.015
17693000	4	0.004
17710000	4	0.004
17725000	11	0.011
17747000	8	0.008
17796000	44	0.044
18080000	6	0.006
18098000	9	0.009
18265000	11	0.011
18711000	17	0.017
19204000	23	0.023
19226000	20	0.02
19383000	15	0.015
19661000	18	0.018
19993000	14	0.014
20208000	7	0.007
20245000	12	0.012
20654000	9	0.009
20948000	9	0.009
21337000	32	0.032
21344000	13	0.013
21557000	10	0.01
21871000	11	0.011
21943000	10	0.01
22422000	16	0.016
22623000	17	0.017
22698000	9	0.009
22815000	20	0.02
22979000	19	0.019
23157000	25	0.025
23269000	24	0.024
23358000	22	0.022
23371000	17	0.017
23546000	13	0.013
23641000	31	0.031
23677000	15	0.015
23729000	22	0.022
23915000	19	0.019
24064000	9	0.009
24119000	18	0.018
24151000	34	0.034
24498000	11	0.011
24541000	12	0.012
24720000	7	0.007
25168000	8	0.008
25241000	9	0.009
25302000	6	0.006
25419000	8	0.008
25647000	34	0.034
25663000	24	0.024
25705000	12	0.012
25877000	11	0.011
26162000	7	0.007
26196000	10	0.01
26335000	13	0.013
26506000	24	0.024
26603000	16	0.016
26810000	6	0.006
26880000	6	0.006
27020000	7	0.007
27281000	21	0.021
27372000	12	0.012
27431000	17	0.017
27551000	26	0.026
27711000	17	0.017
27912000	8	0.008
28099000	3	0.003
28115000	5	0.005
28291000	9	0.009
28593000	12	0.012
28601000	28	0.028
28854000	17	0.017
28956000	7	0.007
28960000	9	0.009
29323000	203	0.203
29727000	5	0.005
29758000	17	0.017
29772000	16	0.016
29892000	7	0.007
30080000	56	0.056
30220000	10	0.01
30337000	10	0.01
30342000	15	0.015
30375000	11	0.011
30408000	6	0.006
30632000	75	0.075
30773000	10	0.01
32342000	19	0.019
32398000	16	0.016
32443000	23	0.023
32528000	5	0.005
32903000	24	0.024
33424000	27	0.027
33502000	18	0.018
33627000	19	0.019
33769000	11	0.011
33920000	13	0.013
34082000	16	0.016
34277000	6	0.006
34325000	7	0.007
34343000	8	0.008
34492000	11	0.011
34714000	18	0.018
34779000	6	0.006
34885000	4	0.004
34918000	12	0.012
35205000	15	0.015
35256000	9	0.009
35580000	9	0.009
35772000	13	0.013
35834000	14	0.014
35881000	11	0.011
36000000	4	0.004
36143000	17	0.017
36183000	5	0.005
36335000	3	0.003
36357000	8	0.008
36457000	8	0.008
36745000	10	0.01
36748000	7	0.007
36920000	9	0.009
36933000	10	0.01
37142000	16	0.016
37300000	11	0.011
37478000	16	0.016
37587000	15	0.015
37819000	9	0.009
37927000	5	0.005
37986000	9	0.009
38095000	9	0.009
38207000	11	0.011
38215000	9	0.009
38255000	11	0.011
38369000	7	0.007
38399000	3	0.003
38629000	5	0.005
38653000	7	0.007
38703000	20	0.02
39160000	11	0.011
39199000	27	0.027
39388000	10	0.01
39501000	15	0.015
39585000	13	0.013
39711000	15	0.015
39755000	21	0.021
39888000	10	0.01
39922000	14	0.014
40672000	16	0.016
40713000	17	0.017
40890000	12	0.012
40903000	19	0.019
40916000	11	0.011
40970000	6	0.006
41366000	25	0.025
41728000	13	0.013
42125000	12	0.012
42228000	14	0.014
42385000	10	0.01
42547000	10	0.01
42610000	11	0.011
43344000	9	0.009
43508000	2	0.002
43710000	8	0.008
43828000	16	0.016
43849000	12	0.012
43994000	10	0.01
44205000	7	0.007
44376000	23	0.023
44567000	13	0.013
44596000	8	0.008
44712000	11	0.011
45022000	6	0.006
45547000	15	0.015
45759000	12	0.012
45985000	16	0.016
46065000	12	0.012
46362000	12	0.012
46376000	9	0.009
46456000	10	0.01
46756000	18	0.018
46870000	20	0.02
47473000	21	0.021
47763000	51	0.051
47901000	15	0.015
47956000	16	0.016
48182000	19	0.019
48320000	19	0.019
48474000	20	0.02
48615000	31	0.031
48762000	30	0.03
48770000	31	0.031
48985000	35	0.035
49020000	32	0.032
49364000	20	0.02
49426000	29	0.029
49534000	16	0.016
49604000	56	0.056
49859000	36	0.036
49981000	44	0.044
50105000	17	0.017
50268000	18	0.018
50288000	22	0.022
50414000	24	0.024
50496000	20	0.02
50583000	25	0.025
51133000	15	0.015
51858000	8	0.008
51919000	16	0.016
52265000	13	0.013
52798000	10	0.01
52822000	9	0.009
53019000	13	0.013
53029000	15	0.015
53301000	11	0.011
53358000	5	0.005
53478000	11	0.011
53609000	11	0.011
53785000	30	0.03
54141000	23	0.023
54399000	23	0.023
54602000	23	0.023
54796000	27	0.027
54945000	26	0.026
55320000	30	0.03
55835000	18	0.018
55922000	53	0.053
56005000	32	0.032
56050000	21	0.021
56116000	30	0.03
56373000	101	0.101
56669000	5	0.005
56715000	5	0.005
56727000	6	0.006
56969000	3	0.003
57048000	36	0.036
57146000	5	0.005
57645000	53	0.053
57670000	48	0.048
57785000	52	0.052
58034000	39	0.039
58412000	28	0.028
58575000	31	0.031
61894000	50	0.05
62184000	48	0.048
62195000	37	0.037
62634000	25	0.025
62723000	25	0.025
62925000	27	0.027
62942000	42	0.042
63124000	35	0.035
63591000	40	0.04
63885000	28	0.028
64054000	13	0.013
64060000	11	0.011
64291000	6	0.006
64568000	19	0.019
64948000	11	0.011
65043000	20	0.02
65060000	23	0.023
65072000	12	0.012
65132000	23	0.023
65166000	22	0.022
65171000	25	0.025
65363000	30	0.03
65373000	48	0.048
65674000	17	0.017
66059000	22	0.022
66485000	40	0.04
66736000	24	0.024
66946000	25	0.025
67323000	32	0.032
67331000	28	0.028
69109000	22	0.022
69342000	15	0.015
69409000	32	0.032
69590000	16	0.016
69605000	26	0.026
69778000	21	0.021
69840000	43	0.043
69861000	29	0.029
69924000	36	0.036
70035000	37	0.037
70074000	31	0.031
70107000	28	0.028
70235000	44	0.044
70251000	55	0.055
70608000	17	0.017
70622000	22	0.022
70773000	16	0.016
71009000	38	0.038
71337000	25	0.025
71366000	9	0.009
71869000	19	0.019
71870000	27	0.027
72826000	22	0.022
73343000	22	0.022
73711000	25	0.025
73738000	19	0.019
73745000	13	0.013
73844000	13	0.013
73869000	16	0.016
73938000	10	0.01
74103000	17	0.017
74253000	5	0.005
74312000	5	0.005
74668000	3	0.003
74740000	30	0.03
75117000	18	0.018
75327000	24	0.024
75344000	24	0.024
75554000	17	0.017
76410000	7	0.007
76423000	28	0.028
76637000	6	0.006
76650000	11	0.011
76713000	66	0.066
76783000	30	0.03
76845000	22	0.022
76901000	23	0.023
76917000	18	0.018
77022000	24	0.024
77050000	25	0.025
77311000	30	0.03
78378000	27	0.027
78441000	15	0.015
78467000	17	0.017
78489000	24	0.024
78925000	28	0.028
78954000	27	0.027
79070000	34	0.034
79251000	37	0.037
79410000	23	0.023
79494000	27	0.027
79933000	5	0.005
79974000	7	0.007
80012000	12	0.012
80033000	14	0.014
80122000	14	0.014
80393000	11	0.011
80581000	9	0.009
80927000	8	0.008
80987000	6	0.006
81559000	10	0.01
82026000	20	0.02
82199000	16	0.016
82347000	10	0.01
82620000	10	0.01
82677000	9	0.009
83243000	30	0.03
83513000	17	0.017
83549000	16	0.016
83660000	14	0.014
83668000	18	0.018
83987000	19	0.019
84005000	17	0.017
84076000	25	0.025
84078000	29	0.029
84190000	21	0.021
84408000	41	0.041
84451000	27	0.027
84772000	52	0.052
85139000	36	0.036
85152000	33	0.033
85162000	29	0.029
85623000	35	0.035
85743000	31	0.031
86058000	13	0.013
86179000	7	0.007
86261000	8	0.008
86264000	6	0.006
86346000	130	0.13
86377000	6	0.006
86472000	21	0.021
86653000	25	0.025
86660000	35	0.035
86774000	32	0.032
86996000	25	0.025
87083000	28	0.028
87129000	27	0.027
87214000	25	0.025
87318000	18	0.018
87396000	37	0.037
87545000	24	0.024
87700000	28	0.028
87730000	9	0.009
87742000	19	0.019
87766000	12	0.012
87769000	8	0.008
87860000	11	0.011
87905000	4	0.004
88179000	12	0.012
88228000	21	0.021
88368000	3	0.003
88436000	10	0.01
88590000	17	0.017
88615000	18	0.018
88721000	17	0.017
89041000	27	0.027
89086000	10	0.01
89222000	10	0.01
89417000	5	0.005
89427000	9	0.009
89539000	9	0.009
89695000	7	0.007
89708000	7	0.007
89786000	11	0.011
89859000	22	0.022
90615000	19	0.019
91343000	21	0.021
91823000	19	0.019
92029000	23	0.023
92091000	18	0.018
92304000	24	0.024
92965000	33	0.033
93047000	22	0.022
93491000	32	0.032
93713000	30	0.03
93757000	27	0.027
93807000	26	0.026
94385000	33	0.033
94405000	45	0.045
94592000	31	0.031
94628000	31	0.031
95141000	46	0.046
95175000	34	0.034
95211000	27	0.027
95382000	40	0.04
95537000	7	0.007
95651000	29	0.029
95956000	18	0.018
96271000	32	0.032
96529000	23	0.023
96572000	36	0.036
96752000	23	0.023
96778000	32	0.032
96909000	21	0.021
97027000	19	0.019
97348000	8	0.008
97509000	9	0.009
97569000	18	0.018
97769000	14	0.014
97829000	21	0.021
97842000	10	0.01
97904000	32	0.032
98137000	20	0.02
98140000	17	0.017
98185000	26	0.026
98229000	36	0.036
98328000	27	0.027
98329000	26	0.026
98363000	28	0.028
98858000	22	0.022
99419000	10	0.01
99552000	18	0.018
99589000	17	0.017
99595000	20	0.02
99900000	4	0.004
100039000	11	0.011
100218000	28	0.028
100231000	18	0.018
100302000	43	0.043
100365000	37	0.037
100488000	30	0.03
100657000	16	0.016
100992000	6	0.006
101062000	17	0.017
101071000	5	0.005
101210000	6	0.006
101270000	3	0.003
101337000	16	0.016
101571000	12	0.012
101734000	10	0.01
101764000	27	0.027
102090000	17	0.017
102273000	22	0.022
102363000	16	0.016
102497000	30	0.03
103369000	32	0.032
103484000	35	0.035
103533000	29	0.029
103685000	45	0.045
103944000	44	0.044
104174000	27	0.027
104307000	45	0.045
104338000	35	0.035
105199000	7	0.007
105236000	11	0.011
105323000	18	0.018
105651000	7	0.007
105792000	5	0.005
105973000	17	0.017
106061000	11	0.011
106349000	17	0.017
106493000	11	0.011
106577000	5	0.005
106588000	9	0.009
106674000	12	0.012
106797000	15	0.015
107333000	15	0.015
107558000	10	0.01
107560000	6	0.006
107704000	4	0.004
107722000	5	0.005
107988000	10	0.01
108080000	17	0.017
108157000	12	0.012
108248000	4	0.004
108347000	2	0.002
108477000	6	0.006
109034000	12	0.012
109261000	8	0.008
109404000	5	0.005
109424000	3	0.003
109668000	2	0.002
109893000	14	0.014
109921000	12	0.012
109962000	32	0.032
110069000	8	0.008
110083000	17	0.017
110205000	6	0.006
110288000	12	0.012
110359000	10	0.01
110368000	11	0.011
110497000	13	0.013
110574000	6	0.006
110577000	18	0.018
110707000	8	0.008
110710000	6	0.006
111156000	2	0.002
111180000	15	0.015
111213000	33	0.033
111281000	17	0.017
111445000	5	0.005
111691000	6	0.006
111730000	6	0.006
111747000	10	0.01
111800000	7	0.007
111802000	5	0.005
112342000	6	0.006
112458000	10	0.01
112730000	31	0.031
112826000	19	0.019
112831000	16	0.016
113000000	16	0.016
113168000	7	0.007
113396000	13	0.013
113944000	12	0.012
114070000	5	0.005
114222000	12	0.012
114252000	8	0.008
114372000	16	0.016
114635000	9	0.009
114690000	24	0.024
114704000	18	0.018
114935000	12	0.012
114960000	15	0.015
115385000	36	0.036
115474000	31	0.031
115615000	34	0.034
115696000	24	0.024
115828000	26	0.026
115871000	32	0.032
115954000	18	0.018
116084000	18	0.018
116120000	20	0.02
116129000	25	0.025
116164000	26	0.026
116430000	12	0.012
116641000	7	0.007
116720000	109	0.109
117271000	25	0.025
117285000	28	0.028
117369000	24	0.024
117779000	17	0.017
117808000	12	0.012
117851000	6	0.006
117868000	12	0.012
118038000	5	0.005
118045000	14	0.014
118050000	17	0.017
118111000	19	0.019
118308000	14	0.014
118520000	12	0.012
118672000	9	0.009
118824000	11	0.011
119082000	8	0.008
119292000	10	0.01
119331000	13	0.013
119451000	11	0.011
119519000	11	0.011
119703000	27	0.027
119710000	18	0.018
120094000	33	0.033
120370000	28	0.028
120915000	28	0.028
121259000	22	0.022
121411000	9	0.009
121437000	10	0.01
121477000	18	0.018
121528000	7	0.007
121757000	15	0.015
121845000	12	0.012
122097000	18	0.018
122638000	32	0.032
122725000	7	0.007
123094000	7	0.007
123367000	24	0.024
123709000	18	0.018
123974000	15	0.015
124025000	18	0.018
124046000	22	0.022
124266000	32	0.032
124443000	31	0.031
124599000	24	0.024
124777000	23	0.023
124816000	17	0.017
124823000	20	0.02
125317000	7	0.007
125412000	14	0.014
125690000	13	0.013
125692000	7	0.007
125757000	11	0.011
125829000	14	0.014
126066000	5	0.005
126117000	5	0.005
126271000	6	0.006
126314000	8	0.008
126390000	14	0.014
126588000	10	0.01
127022000	23	0.023
127413000	20	0.02
127470000	17	0.017
127482000	15	0.015
127613000	6	0.006
127624000	2	0.002
127780000	12	0.012
128136000	21	0.021
128374000	22	0.022
128571000	15	0.015
128711000	20	0.02
128777000	14	0.014
128947000	11	0.011
129408000	19	0.019
129519000	17	0.017
129949000	10	0.01
130354000	5	0.005
130567000	19	0.019
130625000	23	0.023
131425000	15	0.015
132583000	8	0.008
133367000	24	0.024
133469000	31	0.031
133807000	18	0.018
133838000	16	0.016
133964000	20	0.02
134235000	5	0.005
134297000	11	0.011
134631000	8	0.008
134717000	23	0.023
134822000	5	0.005
134843000	4	0.004
135075000	6	0.006
135131000	9	0.009
135338000	6	0.006
136025000	11	0.011
136462000	21	0.021
136741000	9	0.009
136921000	6	0.006
136933000	9	0.009
136965000	8	0.008
136976000	14	0.014
137396000	8	0.008
137448000	5	0.005
137538000	9	0.009
137607000	7	0.007
137663000	9	0.009
137838000	16	0.016
137975000	18	0.018
138185000	3	0.003
138213000	6	0.006
138819000	3	0.003
139024000	11	0.011
139159000	43	0.043
139575000	14	0.014
139655000	19	0.019
139995000	7	0.007
140005000	12	0.012
140103000	13	0.013
140239000	14	0.014
140423000	11	0.011
140464000	16	0.016
140465000	12	0.012
140725000	12	0.012
140973000	9	0.009
140977000	22	0.022
141106000	20	0.02
141211000	17	0.017
141325000	14	0.014
141429000	23	0.023
141592000	16	0.016
141634000	10	0.01
141717000	14	0.014
141754000	20	0.02
141958000	16	0.016
142091000	23	0.023
142161000	19	0.019
142377000	10	0.01
142694000	4	0.004
142706000	17	0.017
142899000	11	0.011
142917000	14	0.014
143174000	7	0.007
143217000	8	0.008
143453000	5	0.005
143471000	6	0.006
143704000	15	0.015
143813000	7	0.007
144120000	9	0.009
144209000	6	0.006
144355000	9	0.009
144398000	9	0.009
144440000	15	0.015
144450000	10	0.01
144884000	9	0.009
144915000	3	0.003
145000000	13	0.013
145065000	7	0.007
145249000	10	0.01
145529000	18	0.018
145722000	21	0.021
145723000	20	0.02
145728000	8	0.008
145824000	7	0.007
145901000	8	0.008
146156000	3	0.003
146442000	12	0.012
146648000	17	0.017
146880000	6	0.006
146904000	18	0.018
147259000	6	0.006
147382000	9	0.009
147447000	3	0.003
147843000	8	0.008
147916000	12	0.012
148000000	17	0.017
148197000	7	0.007
148229000	16	0.016
148347000	11	0.011
148421000	10	0.01
148530000	19	0.019
148627000	12	0.012
148745000	14	0.014
148798000	6	0.006
148824000	6	0.006
148914000	10	0.01
148969000	16	0.016
149112000	5	0.005
149376000	6	0.006
149517000	8	0.008
149748000	5	0.005
150227000	9	0.009
150260000	12	0.012
150457000	9	0.009
150567000	7	0.007
150681000	8	0.008
150822000	7	0.007
150865000	4	0.004
151200000	6	0.006
151308000	4	0.004
151369000	25	0.025
152003000	9	0.009
152111000	13	0.013
152179000	9	0.009
152292000	20	0.02
152493000	11	0.011
152644000	94	0.094
152973000	24	0.024
153018000	24	0.024
153265000	16	0.016
153708000	15	0.015
153980000	24	0.024
154126000	27	0.027
154686000	7	0.007
154788000	5	0.005
154824000	1	0.001
154851000	9	0.009
155226000	5	0.005
155308000	5	0.005
155755000	7	0.007
155825000	13	0.013
155826000	9	0.009
156163000	20	0.02
156724000	12	0.012
156805000	12	0.012
156824000	21	0.021
156929000	15	0.015
157266000	6	0.006
157724000	7	0.007
158147000	14	0.014
158380000	16	0.016
158540000	12	0.012
158734000	5	0.005
158814000	8	0.008
158841000	5	0.005
158910000	32	0.032
159205000	12	0.012
159247000	8	0.008
159857000	20	0.02
160041000	13	0.013
160092000	11	0.011
160186000	9	0.009
160224000	21	0.021
160233000	7	0.007
160241000	17	0.017
160337000	15	0.015
160501000	24	0.024
160694000	8	0.008
160932000	9	0.009
161057000	1	0.001
161811000	15	0.015
161978000	23	0.023
162187000	17	0.017
162204000	13	0.013
162270000	25	0.025
162476000	23	0.023
162479000	26	0.026
162813000	20	0.02
162865000	11	0.011
162955000	16	0.016
163382000	12	0.012
163392000	26	0.026
163535000	28	0.028
163539000	18	0.018
163567000	27	0.027
163724000	16	0.016
163935000	7	0.007
163996000	5	0.005
164072000	20	0.02
164250000	12	0.012
164924000	18	0.018
165138000	13	0.013
165189000	30	0.03
165794000	15	0.015
165954000	9	0.009
166058000	22	0.022
166132000	10	0.01
166231000	13	0.013
166364000	16	0.016
166500000	15	0.015
166571000	186	0.186
166871000	8	0.008
166980000	6	0.006
167569000	6	0.006
167860000	17	0.017
167874000	4	0.004
167919000	11	0.011
168124000	11	0.011
168319000	42	0.042
168490000	10	0.01
168602000	5	0.005
168637000	20	0.02
168664000	7	0.007
169052000	24	0.024
169122000	9	0.009
169156000	15	0.015
169962000	14	0.014
170049000	6	0.006
170115000	20	0.02
170333000	14	0.014
170360000	12	0.012
170777000	16	0.016
170805000	44	0.044
170851000	9	0.009
		16.591
		0.0171572

## Sheet: chr7_output
Position	Total number of SNVs per 1000 bases	Ratio
94000	18	0.018
471000	10	0.01		ps: positions are from chromoome 7
614000	6	0.006
1598000	12	0.012
1693000	14	0.014
1843000	21	0.021
2273000	8	0.008
2416000	26	0.026
2573000	17	0.017
2808000	7	0.007
2956000	44	0.044
3010000	15	0.015
3255000	26	0.026
3409000	11	0.011
3450000	17	0.017
3499000	12	0.012
3624000	23	0.023
3639000	14	0.014
3986000	13	0.013
4227000	13	0.013
4231000	16	0.016
4447000	14	0.014
4448000	19	0.019
4631000	11	0.011
4865000	13	0.013
4980000	13	0.013
5212000	15	0.015
5255000	13	0.013
5863000	13	0.013
6265000	2	0.002
6275000	5	0.005
6377000	9	0.009
6490000	9	0.009
6715000	20	0.02
6790000	3	0.003
6849000	12	0.012
6856000	14	0.014
6857000	11	0.011
6946000	16	0.016
6984000	19	0.019
7071000	14	0.014
7089000	13	0.013
7102000	16	0.016
7125000	13	0.013
7320000	11	0.011
7408000	16	0.016
7504000	13	0.013
7609000	7	0.007
7612000	87	0.087
7622000	27	0.027
7795000	8	0.008
7988000	8	0.008
8173000	10	0.01
8403000	20	0.02
8421000	21	0.021
8488000	25	0.025
8506000	31	0.031
8570000	26	0.026
8576000	29	0.029
8658000	31	0.031
8732000	20	0.02
8896000	33	0.033
8991000	32	0.032
9071000	31	0.031
9279000	9	0.009
9391000	29	0.029
10089000	14	0.014
10238000	19	0.019
10258000	12	0.012
10269000	23	0.023
10381000	18	0.018
10395000	42	0.042
10399000	37	0.037
10852000	25	0.025
10876000	18	0.018
10903000	26	0.026
11016000	13	0.013
11117000	11	0.011
11127000	10	0.01
11188000	16	0.016
11392000	29	0.029
11393000	21	0.021
11451000	16	0.016
11826000	20	0.02
12255000	9	0.009
12724000	12	0.012
13157000	9	0.009
13247000	22	0.022
13747000	14	0.014
13905000	12	0.012
13927000	18	0.018
14004000	5	0.005
14015000	16	0.016
14104000	20	0.02
14185000	24	0.024
14328000	17	0.017
14605000	28	0.028
14606000	18	0.018
14700000	20	0.02
15028000	23	0.023
15218000	24	0.024
15305000	15	0.015
15321000	27	0.027
15494000	15	0.015
15588000	7	0.007
15762000	20	0.02
15776000	12	0.012
15835000	26	0.026
15909000	19	0.019
16054000	15	0.015
16278000	19	0.019
16597000	8	0.008
16767000	9	0.009
16828000	1	0.001
16999000	12	0.012
17174000	14	0.014
17238000	15	0.015
17496000	7	0.007
17673000	10	0.01
17774000	20	0.02
17891000	11	0.011
18045000	13	0.013
18130000	17	0.017
18445000	22	0.022
18461000	21	0.021
18474000	26	0.026
18507000	19	0.019
18561000	19	0.019
18938000	37	0.037
19335000	24	0.024
19373000	20	0.02
19632000	26	0.026
20003000	19	0.019
20112000	8	0.008
20124000	15	0.015
20304000	16	0.016
20330000	11	0.011
20531000	23	0.023
20578000	10	0.01
20947000	33	0.033
20981000	28	0.028
21068000	23	0.023
21247000	16	0.016
21503000	10	0.01
21794000	17	0.017
22063000	25	0.025
22077000	26	0.026
22214000	14	0.014
22307000	16	0.016
22406000	9	0.009
22880000	7	0.007
23010000	9	0.009
23637000	9	0.009
23767000	11	0.011
23862000	20	0.02
23863000	22	0.022
24003000	24	0.024
24032000	22	0.022
24356000	17	0.017
24387000	18	0.018
24429000	16	0.016
24466000	24	0.024
24558000	27	0.027
24729000	12	0.012
24807000	19	0.019
25018000	9	0.009
25023000	3	0.003
25376000	17	0.017
25501000	18	0.018
25626000	10	0.01
25632000	12	0.012
25707000	16	0.016
25732000	17	0.017
25762000	18	0.018
25972000	18	0.018
26059000	9	0.009
26431000	12	0.012
26433000	12	0.012
27002000	17	0.017
27299000	19	0.019
27379000	10	0.01
27556000	6	0.006
28006000	7	0.007
28118000	6	0.006
28465000	21	0.021
28530000	17	0.017
28798000	17	0.017
29130000	2	0.002
29277000	10	0.01
29424000	7	0.007
29625000	8	0.008
29674000	8	0.008
29723000	10	0.01
30241000	15	0.015
30244000	6	0.006
30291000	11	0.011
30376000	1	0.001
30379000	8	0.008
30566000	5	0.005
30667000	9	0.009
30751000	13	0.013
30802000	22	0.022
30887000	8	0.008
30909000	11	0.011
31068000	24	0.024
31186000	17	0.017
31272000	25	0.025
31320000	8	0.008
31610000	28	0.028
31746000	88	0.088
32033000	27	0.027
32323000	30	0.03
32398000	37	0.037
32524000	12	0.012
32631000	9	0.009
32668000	12	0.012
32800000	10	0.01
33328000	13	0.013
33482000	13	0.013
33677000	16	0.016
33745000	11	0.011
33918000	8	0.008
34055000	31	0.031
34148000	26	0.026
34193000	17	0.017
34235000	32	0.032
34342000	29	0.029
34539000	40	0.04
34834000	27	0.027
34908000	28	0.028
35034000	10	0.01
35339000	36	0.036
35374000	32	0.032
35427000	37	0.037
35925000	11	0.011
36035000	10	0.01
36121000	13	0.013
36137000	14	0.014
36465000	34	0.034
36604000	12	0.012
36692000	10	0.01
36789000	20	0.02
36873000	22	0.022
37247000	11	0.011
37375000	27	0.027
37907000	81	0.081
38090000	17	0.017
38396000	9	0.009
38450000	17	0.017
38930000	5	0.005
39026000	26	0.026
39242000	25	0.025
39299000	12	0.012
39331000	26	0.026
39510000	13	0.013
39694000	4	0.004
39729000	7	0.007
40031000	14	0.014
40091000	7	0.007
40163000	10	0.01
40243000	20	0.02
40420000	19	0.019
40540000	17	0.017
41002000	34	0.034
41192000	31	0.031
41264000	25	0.025
41312000	26	0.026
41590000	30	0.03
41648000	30	0.03
41948000	28	0.028
41963000	24	0.024
42057000	23	0.023
42067000	16	0.016
42398000	23	0.023
42599000	25	0.025
42755000	29	0.029
43126000	31	0.031
43149000	15	0.015
43218000	16	0.016
43456000	24	0.024
43489000	22	0.022
43877000	9	0.009
44100000	100	0.1
44276000	10	0.01
44308000	14	0.014
44346000	9	0.009
44440000	11	0.011
44572000	16	0.016
44606000	36	0.036
44671000	15	0.015
44856000	13	0.013
44983000	15	0.015
44998000	11	0.011
45029000	11	0.011
45129000	14	0.014
45156000	17	0.017
45557000	25	0.025
46013000	12	0.012
46531000	12	0.012
46661000	11	0.011
46739000	15	0.015
46770000	10	0.01
47588000	6	0.006
47749000	16	0.016
47759000	8	0.008
47801000	7	0.007
48704000	18	0.018
48735000	26	0.026
48859000	34	0.034
49163000	33	0.033
49420000	31	0.031
49487000	37	0.037
49697000	30	0.03
50014000	28	0.028
50134000	13	0.013
50156000	24	0.024
50280000	23	0.023
50345000	25	0.025
50484000	6	0.006
50638000	25	0.025
50858000	11	0.011
50988000	16	0.016
51035000	17	0.017
51579000	28	0.028
51620000	19	0.019
51727000	28	0.028
51943000	47	0.047
52118000	31	0.031
52120000	26	0.026
52403000	36	0.036
52575000	35	0.035
52592000	39	0.039
52692000	42	0.042
52794000	37	0.037
52802000	38	0.038
53029000	41	0.041
53202000	61	0.061
53217000	44	0.044
53762000	38	0.038
53782000	49	0.049
53784000	61	0.061
54004000	24	0.024
54038000	45	0.045
54233000	54	0.054
54264000	37	0.037
54281000	48	0.048
54389000	41	0.041
54406000	38	0.038
54407000	43	0.043
54424000	42	0.042
54448000	34	0.034
54535000	40	0.04
54550000	45	0.045
54708000	22	0.022
55279000	17	0.017
55368000	9	0.009
55671000	22	0.022
56047000	14	0.014
56091000	9	0.009
56275000	8	0.008
56586000	43	0.043
56595000	40	0.04
56670000	42	0.042
56686000	31	0.031
56990000	37	0.037
57203000	51	0.051
57204000	47	0.047
57530000	57	0.057
57544000	39	0.039
57843000	42	0.042
57953000	30	0.03
57959000	35	0.035
61173000	4	0.004
61238000	21	0.021
61384000	1	0.001
61397000	5	0.005
61404000	7	0.007
61513000	68	0.068
61547000	98	0.098
61676000	1	0.001
61800000	61	0.061
61835000	41	0.041
61908000	80	0.08
62002000	59	0.059
62194000	50	0.05
62255000	45	0.045
62727000	43	0.043
62895000	1	0.001
63043000	31	0.031
63687000	36	0.036
63847000	34	0.034
64273000	7	0.007
64475000	14	0.014
64571000	24	0.024
64609000	14	0.014
64980000	29	0.029
65380000	9	0.009
65399000	13	0.013
65624000	7	0.007
65761000	6	0.006
65860000	2	0.002
65863000	6	0.006
66072000	10	0.01
66083000	12	0.012
66490000	19	0.019
66549000	9	0.009
66606000	7	0.007
66648000	26	0.026
66658000	4	0.004
66968000	31	0.031
67003000	29	0.029
67076000	26	0.026
67107000	26	0.026
67169000	21	0.021
67554000	26	0.026
67640000	26	0.026
67819000	28	0.028
67932000	27	0.027
68047000	26	0.026
68463000	36	0.036
68570000	42	0.042
68577000	33	0.033
68833000	27	0.027
68896000	17	0.017
68932000	14	0.014
69002000	28	0.028
69525000	20	0.02
69795000	30	0.03
69904000	22	0.022
70049000	16	0.016
70093000	20	0.02
70469000	45	0.045
70640000	25	0.025
70782000	41	0.041
70992000	33	0.033
71105000	45	0.045
71402000	26	0.026
71576000	31	0.031
71825000	18	0.018
72002000	14	0.014
72383000	13	0.013
72385000	12	0.012
72496000	5	0.005
72930000	14	0.014
72979000	12	0.012
72989000	6	0.006
73000000	6	0.006
73205000	16	0.016
73577000	13	0.013
73695000	7	0.007
73733000	2	0.002
73757000	8	0.008
73915000	3	0.003
74047000	7	0.007
74135000	5	0.005
74202000	3	0.003
74342000	1	0.001
74346000	4	0.004
74573000	6	0.006
75062000	8	0.008
75121000	8	0.008
75131000	26	0.026
75561000	10	0.01
75624000	12	0.012
76085000	18	0.018
76093000	12	0.012
76278000	10	0.01
76536000	13	0.013
76605000	13	0.013
77068000	12	0.012
77117000	16	0.016
77175000	10	0.01
77272000	6	0.006
77348000	7	0.007
77479000	5	0.005
77638000	17	0.017
77707000	16	0.016
77998000	25	0.025
78014000	20	0.02
79177000	20	0.02
79271000	22	0.022
79391000	24	0.024
79412000	14	0.014
79522000	25	0.025
79777000	7	0.007
79795000	12	0.012
80111000	9	0.009
80318000	15	0.015
80723000	12	0.012
80931000	9	0.009
81136000	18	0.018
81415000	18	0.018
81570000	14	0.014
81643000	32	0.032
81893000	13	0.013
81932000	16	0.016
81937000	15	0.015
82073000	8	0.008
82096000	17	0.017
82111000	19	0.019
82208000	26	0.026
82228000	27	0.027
82519000	21	0.021
82732000	20	0.02
82799000	33	0.033
82817000	33	0.033
82892000	45	0.045
82930000	27	0.027
82982000	35	0.035
83367000	15	0.015
83471000	24	0.024
83580000	17	0.017
83669000	10	0.01
83767000	11	0.011
83828000	21	0.021
83997000	14	0.014
84161000	20	0.02
84293000	15	0.015
84334000	19	0.019
84685000	39	0.039
84722000	23	0.023
84999000	34	0.034
85007000	19	0.019
85232000	15	0.015
85401000	26	0.026
85483000	21	0.021
85634000	51	0.051
85771000	18	0.018
86178000	39	0.039
86301000	42	0.042
86610000	17	0.017
86687000	13	0.013
86832000	3	0.003
86842000	7	0.007
87165000	28	0.028
87241000	25	0.025
87271000	17	0.017
87374000	22	0.022
87517000	8	0.008
87670000	13	0.013
87751000	15	0.015
88493000	27	0.027
88673000	25	0.025
88709000	13	0.013
88757000	32	0.032
88883000	13	0.013
89061000	20	0.02
89135000	13	0.013
89145000	26	0.026
89183000	25	0.025
89240000	19	0.019
89271000	33	0.033
89444000	32	0.032
89565000	38	0.038
89636000	25	0.025
89715000	21	0.021
90136000	17	0.017
90370000	7	0.007
90509000	20	0.02
90639000	20	0.02
90650000	17	0.017
90699000	12	0.012
91011000	11	0.011
91274000	20	0.02
91698000	5	0.005
91712000	100	0.1
91853000	7	0.007
92143000	77	0.077
92221000	12	0.012
92319000	6	0.006
92399000	12	0.012
92703000	17	0.017
92929000	4	0.004
92932000	39	0.039
93135000	37	0.037
93328000	14	0.014
93369000	26	0.026
93446000	22	0.022
93522000	18	0.018
93930000	12	0.012
94053000	51	0.051
94115000	22	0.022
94312000	11	0.011
94570000	16	0.016
94597000	16	0.016
94894000	12	0.012
95171000	19	0.019
95430000	3	0.003
95437000	12	0.012
95801000	3	0.003
95837000	1	0.001
95867000	10	0.01
96018000	10	0.01
96202000	18	0.018
97038000	20	0.02
97289000	32	0.032
98040000	14	0.014
98084000	13	0.013
98178000	13	0.013
98339000	23	0.023
98468000	8	0.008
98473000	12	0.012
98711000	6	0.006
99490000	83	0.083
99678000	10	0.01
99883000	8	0.008
99940000	8	0.008
100295000	13	0.013
100449000	10	0.01
100610000	21	0.021
100617000	23	0.023
100731000	84	0.084
100943000	17	0.017
101032000	8	0.008
101111000	19	0.019
101613000	8	0.008
101705000	13	0.013
101825000	10	0.01
102174000	4	0.004
102596000	11	0.011
102603000	25	0.025
102639000	9	0.009
102696000	9	0.009
103065000	16	0.016
103333000	19	0.019
103702000	17	0.017
103880000	8	0.008
103936000	15	0.015
104003000	9	0.009
104382000	10	0.01
104437000	12	0.012
104440000	10	0.01
104494000	9	0.009
104516000	12	0.012
104897000	9	0.009
105101000	5	0.005
105128000	8	0.008
105708000	11	0.011
105834000	15	0.015
105933000	11	0.011
105947000	5	0.005
105955000	14	0.014
106233000	13	0.013
106892000	8	0.008
106965000	8	0.008
107300000	10	0.01
107315000	42	0.042
107343000	12	0.012
107352000	16	0.016
107796000	8	0.008
107817000	18	0.018
107860000	6	0.006
108112000	84	0.084
108278000	16	0.016
108359000	43	0.043
108584000	23	0.023
108778000	44	0.044
108787000	37	0.037
108798000	21	0.021
108800000	24	0.024
108855000	30	0.03
108891000	42	0.042
109230000	24	0.024
109241000	29	0.029
109412000	27	0.027
109712000	30	0.03
109738000	10	0.01
109879000	20	0.02
109919000	13	0.013
110103000	19	0.019
110163000	16	0.016
110258000	24	0.024
110339000	11	0.011
110425000	5	0.005
110428000	16	0.016
110464000	16	0.016
110665000	23	0.023
110751000	21	0.021
110986000	11	0.011
111118000	11	0.011
111548000	12	0.012
111639000	18	0.018
111783000	13	0.013
112613000	23	0.023
113322000	27	0.027
113664000	20	0.02
113793000	22	0.022
113932000	29	0.029
114113000	14	0.014
114137000	22	0.022
114172000	13	0.013
114318000	15	0.015
114464000	30	0.03
114484000	20	0.02
114580000	14	0.014
115419000	17	0.017
115609000	33	0.033
116052000	4	0.004
116074000	6	0.006
116114000	12	0.012
116393000	9	0.009
116495000	26	0.026
116979000	20	0.02
117398000	22	0.022
117430000	8	0.008
117515000	11	0.011
117523000	15	0.015
117556000	29	0.029
117642000	15	0.015
117868000	22	0.022
118101000	30	0.03
118160000	18	0.018
118225000	36	0.036
118358000	19	0.019
118593000	42	0.042
119105000	28	0.028
119144000	42	0.042
119406000	38	0.038
119470000	41	0.041
119509000	34	0.034
119543000	39	0.039
119803000	39	0.039
119978000	31	0.031
120010000	38	0.038
120192000	20	0.02
120285000	20	0.02
120491000	17	0.017
120694000	20	0.02
120986000	6	0.006
121159000	15	0.015
121317000	8	0.008
121425000	7	0.007
121697000	5	0.005
121976000	14	0.014
121990000	14	0.014
122192000	12	0.012
122262000	15	0.015
122410000	12	0.012
122457000	13	0.013
122968000	13	0.013
122978000	13	0.013
123106000	21	0.021
123239000	16	0.016
123290000	13	0.013
123434000	18	0.018
123577000	25	0.025
123699000	17	0.017
123829000	15	0.015
123875000	21	0.021
123910000	18	0.018
124035000	23	0.023
124076000	23	0.023
124235000	11	0.011
124432000	21	0.021
124577000	13	0.013
124652000	22	0.022
124997000	14	0.014
125060000	33	0.033
125121000	26	0.026
125225000	31	0.031
125252000	35	0.035
125285000	32	0.032
125337000	29	0.029
125359000	27	0.027
125444000	37	0.037
125544000	16	0.016
125706000	31	0.031
125806000	29	0.029
126004000	29	0.029
126263000	29	0.029
126311000	34	0.034
126516000	27	0.027
126565000	33	0.033
126653000	38	0.038
126867000	22	0.022
126936000	17	0.017
126989000	8	0.008
127012000	9	0.009
127053000	10	0.01
127199000	12	0.012
127385000	7	0.007
127395000	16	0.016
127404000	9	0.009
127554000	7	0.007
127760000	13	0.013
127972000	4	0.004
128138000	15	0.015
128356000	49	0.049
128679000	8	0.008
128859000	6	0.006
128872000	6	0.006
129140000	16	0.016
129223000	18	0.018
129636000	11	0.011
129662000	62	0.062
129867000	14	0.014
129956000	13	0.013
130056000	16	0.016
130273000	8	0.008
130358000	6	0.006
130645000	11	0.011
130662000	4	0.004
131191000	55	0.055
131264000	14	0.014
131652000	25	0.025
131686000	23	0.023
131705000	18	0.018
131707000	20	0.02
132065000	20	0.02
132165000	30	0.03
132180000	12	0.012
132221000	20	0.02
132233000	17	0.017
132234000	17	0.017
132431000	26	0.026
132650000	5	0.005
132927000	11	0.011
132963000	9	0.009
133282000	14	0.014
133350000	10	0.01
133378000	6	0.006
133420000	16	0.016
133498000	12	0.012
133560000	6	0.006
134147000	12	0.012
134214000	12	0.012
134269000	17	0.017
134455000	10	0.01
134491000	9	0.009
134660000	6	0.006
134841000	6	0.006
135032000	8	0.008
135153000	6	0.006
135279000	33	0.033
135303000	20	0.02
135566000	7	0.007
135760000	24	0.024
135911000	24	0.024
135929000	28	0.028
135986000	21	0.021
136034000	28	0.028
136235000	32	0.032
136266000	20	0.02
136360000	30	0.03
136767000	29	0.029
136899000	22	0.022
137448000	23	0.023
137463000	21	0.021
137577000	4	0.004
137674000	9	0.009
137842000	23	0.023
137974000	17	0.017
138043000	20	0.02
138072000	17	0.017
138156000	9	0.009
138163000	9	0.009
138805000	13	0.013
139024000	11	0.011
139122000	1	0.001
139557000	14	0.014
139651000	12	0.012
140152000	9	0.009
140229000	8	0.008
140278000	18	0.018
140621000	6	0.006
140683000	13	0.013
141007000	26	0.026
141029000	24	0.024
141283000	18	0.018
141467000	11	0.011
141487000	9	0.009
141491000	28	0.028
141520000	26	0.026
141641000	27	0.027
141693000	35	0.035
141709000	34	0.034
141945000	55	0.055
142392000	18	0.018
142567000	37	0.037
142661000	40	0.04
142732000	23	0.023
142736000	22	0.022
142870000	14	0.014
142971000	3	0.003
143454000	4	0.004
144038000	10	0.01
144090000	9	0.009
144423000	14	0.014
144592000	19	0.019
144829000	48	0.048
145012000	43	0.043
145090000	41	0.041
145230000	36	0.036
145928000	48	0.048
146179000	24	0.024
146398000	37	0.037
146511000	37	0.037
146699000	34	0.034
146701000	31	0.031
146736000	38	0.038
146914000	35	0.035
147037000	28	0.028
147173000	38	0.038
147389000	33	0.033
147430000	32	0.032
147664000	18	0.018
147846000	32	0.032
147889000	19	0.019
147985000	23	0.023
148413000	7	0.007
148418000	9	0.009
148608000	5	0.005
148673000	11	0.011
148721000	9	0.009
148789000	7	0.007
148885000	8	0.008
148947000	77	0.077
148979000	9	0.009
149131000	8	0.008
149152000	105	0.105
149342000	20	0.02
149635000	6	0.006
149677000	3	0.003
149892000	17	0.017
150035000	22	0.022
150063000	9	0.009
150190000	17	0.017
150365000	24	0.024
150544000	21	0.021
150763000	93	0.093
151134000	12	0.012
151138000	11	0.011
151168000	9	0.009
151297000	8	0.008
151317000	6	0.006
151439000	7	0.007
151607000	18	0.018
151608000	8	0.008
151677000	11	0.011
151679000	8	0.008
151825000	2	0.002
151910000	10	0.01
152039000	5	0.005
152998000	36	0.036
153449000	17	0.017
153450000	23	0.023
153514000	21	0.021
153633000	32	0.032
154052000	19	0.019
154370000	8	0.008
154405000	20	0.02
154430000	24	0.024
154527000	22	0.022
154539000	16	0.016
154683000	13	0.013
154727000	8	0.008
154867000	28	0.028
154916000	38	0.038
155033000	20	0.02
155052000	18	0.018
155084000	11	0.011
155115000	12	0.012
155335000	15	0.015
155468000	10	0.01
155477000	4	0.004
155794000	32	0.032
156053000	16	0.016
156211000	16	0.016
156376000	9	0.009
156441000	10	0.01
156526000	11	0.011
157420000	28	0.028
157807000	32	0.032
158299000	30	0.03
158416000	10	0.01
158862000	14	0.014
158911000	13	0.013
158985000	23	0.023
		19.704
		0.0201472

## Sheet: chr8_output
Position	Total number of SNVs per 1000 bases	Ratio
100000	2	0.002
103000	6	0.006		ps: positions are from chromoome 8
396000	4	0.004
414000	3	0.003
438000	7	0.007
474000	8	0.008
525000	13	0.013
572000	13	0.013
578000	11	0.011
595000	1	0.001
860000	24	0.024
889000	9	0.009
917000	13	0.013
1011000	26	0.026
1040000	35	0.035
1259000	17	0.017
1654000	11	0.011
1931000	4	0.004
2036000	11	0.011
2080000	12	0.012
2127000	19	0.019
2330000	8	0.008
2361000	29	0.029
2396000	28	0.028
2601000	41	0.041
2683000	40	0.04
3094000	28	0.028
3475000	36	0.036
3820000	34	0.034
3957000	25	0.025
4528000	15	0.015
4812000	26	0.026
5292000	20	0.02
5629000	40	0.04
5853000	29	0.029
5954000	24	0.024
6010000	24	0.024
6336000	6	0.006
6362000	6	0.006
6471000	4	0.004
6526000	5	0.005
6594000	4	0.004
6610000	5	0.005
6612000	38	0.038
6801000	18	0.018
6993000	13	0.013
7239000	22	0.022
7383000	7	0.007
7721000	9	0.009
7725000	2	0.002
8382000	5	0.005
8604000	10	0.01
8656000	10	0.01
8737000	7	0.007
8773000	17	0.017
8869000	27	0.027
9027000	13	0.013
9353000	16	0.016
9529000	8	0.008
9530000	6	0.006
9685000	10	0.01
9966000	5	0.005
10066000	12	0.012
10158000	9	0.009
10232000	8	0.008
10696000	5	0.005
10739000	14	0.014
10766000	18	0.018
10836000	13	0.013
10867000	10	0.01
10880000	8	0.008
10899000	21	0.021
10917000	9	0.009
11024000	13	0.013
11112000	12	0.012
11261000	6	0.006
11341000	12	0.012
11436000	7	0.007
11690000	5	0.005
13205000	5	0.005
13269000	10	0.01
13280000	10	0.01
13542000	25	0.025
13558000	31	0.031
13666000	40	0.04
13852000	38	0.038
14238000	28	0.028
14366000	28	0.028
14406000	43	0.043
14515000	37	0.037
14788000	44	0.044
14972000	39	0.039
15222000	21	0.021
15308000	29	0.029
15334000	23	0.023
15410000	16	0.016
15627000	22	0.022
15844000	33	0.033
16123000	23	0.023
16212000	32	0.032
16407000	23	0.023
16705000	15	0.015
16769000	18	0.018
16787000	15	0.015
16995000	11	0.011
17060000	8	0.008
17328000	13	0.013
17609000	7	0.007
17880000	4	0.004
17897000	7	0.007
17936000	7	0.007
18110000	8	0.008
18239000	9	0.009
18310000	15	0.015
18317000	17	0.017
18616000	7	0.007
18638000	8	0.008
19116000	6	0.006
19123000	7	0.007
19211000	7	0.007
19224000	2	0.002
19264000	5	0.005
19374000	13	0.013
19403000	5	0.005
19809000	56	0.056
19858000	10	0.01
19873000	9	0.009
19966000	9	0.009
20135000	3	0.003
20144000	9	0.009
20302000	14	0.014
20397000	25	0.025
20512000	20	0.02
20933000	30	0.03
21101000	20	0.02
21152000	26	0.026
21462000	13	0.013
21562000	47	0.047
21591000	14	0.014
21690000	12	0.012
21728000	12	0.012
21786000	6	0.006
21798000	11	0.011
22069000	14	0.014
22116000	9	0.009
22243000	3	0.003
22656000	10	0.01
22736000	6	0.006
22792000	8	0.008
22931000	4	0.004
23119000	7	0.007
23291000	33	0.033
23575000	15	0.015
23671000	26	0.026
23927000	23	0.023
23988000	22	0.022
24718000	25	0.025
25101000	13	0.013
25112000	5	0.005
25130000	8	0.008
25216000	17	0.017
25538000	19	0.019
25734000	20	0.02
25948000	15	0.015
26042000	11	0.011
26208000	6	0.006
26235000	6	0.006
26309000	3	0.003
26461000	5	0.005
26502000	6	0.006
26505000	47	0.047
26846000	26	0.026
26903000	21	0.021
26948000	17	0.017
27212000	3	0.003
27246000	10	0.01
27518000	9	0.009
27677000	7	0.007
27775000	10	0.01
27858000	10	0.01
27860000	14	0.014
27949000	6	0.006
28146000	14	0.014
28174000	3	0.003
28243000	5	0.005
28458000	5	0.005
28754000	7	0.007
28768000	5	0.005
28958000	13	0.013
29183000	7	0.007
29492000	8	0.008
29509000	3	0.003
29524000	1	0.001
29697000	5	0.005
29713000	14	0.014
30039000	5	0.005
30188000	10	0.01
30342000	1	0.001
30465000	9	0.009
30536000	8	0.008
30728000	10	0.01
31059000	11	0.011
31256000	24	0.024
31287000	27	0.027
31396000	20	0.02
31479000	25	0.025
31556000	26	0.026
31760000	21	0.021
31765000	29	0.029
32241000	28	0.028
32290000	41	0.041
32297000	32	0.032
32513000	21	0.021
32864000	11	0.011
32949000	15	0.015
33173000	9	0.009
33242000	5	0.005
33373000	5	0.005
33554000	24	0.024
33577000	24	0.024
34029000	34	0.034
34160000	20	0.02
34180000	33	0.033
34270000	30	0.03
34580000	22	0.022
34721000	25	0.025
34934000	29	0.029
35015000	21	0.021
35116000	40	0.04
35318000	26	0.026
35368000	16	0.016
35393000	25	0.025
35396000	16	0.016
35506000	28	0.028
35640000	37	0.037
35744000	17	0.017
36045000	30	0.03
36209000	26	0.026
36460000	34	0.034
36555000	18	0.018
36859000	11	0.011
36991000	15	0.015
37141000	16	0.016
37511000	9	0.009
37528000	9	0.009
37709000	7	0.007
37750000	12	0.012
37832000	10	0.01
37983000	9	0.009
37985000	59	0.059
38183000	6	0.006
38290000	7	0.007
38299000	1	0.001
38791000	16	0.016
38823000	6	0.006
38890000	5	0.005
38956000	4	0.004
39115000	22	0.022
39124000	30	0.03
39137000	25	0.025
39207000	16	0.016
39344000	14	0.014
39452000	32	0.032
39585000	41	0.041
39642000	22	0.022
39653000	24	0.024
39657000	20	0.02
39928000	10	0.01
40142000	26	0.026
40458000	32	0.032
40706000	23	0.023
40764000	55	0.055
41419000	14	0.014
41537000	9	0.009
41614000	15	0.015
41638000	19	0.019
41661000	16	0.016
41826000	7	0.007
42149000	9	0.009
42213000	10	0.01
42280000	8	0.008
42309000	19	0.019
42461000	13	0.013
42781000	8	0.008
42847000	5	0.005
43154000	23	0.023
43287000	37	0.037
43328000	23	0.023
43398000	24	0.024
43459000	33	0.033
43495000	27	0.027
43579000	37	0.037
43693000	26	0.026
43790000	32	0.032
46961000	31	0.031
47164000	35	0.035
47475000	54	0.054
47673000	40	0.04
47753000	31	0.031
48030000	19	0.019
48315000	14	0.014
48433000	8	0.008
48459000	11	0.011
48626000	39	0.039
48792000	2	0.002
48976000	3	0.003
49072000	10	0.01
49100000	11	0.011
49233000	12	0.012
49474000	15	0.015
49581000	5	0.005
49602000	14	0.014
49694000	14	0.014
49700000	13	0.013
49717000	17	0.017
49729000	10	0.01
49788000	13	0.013
49939000	24	0.024
50051000	25	0.025
50177000	32	0.032
50189000	38	0.038
50276000	27	0.027
50287000	19	0.019
50375000	36	0.036
50386000	43	0.043
50523000	36	0.036
50593000	43	0.043
50632000	31	0.031
50866000	25	0.025
50902000	25	0.025
51310000	33	0.033
51694000	36	0.036
51794000	41	0.041
51842000	37	0.037
51848000	49	0.049
52207000	28	0.028
52264000	25	0.025
52620000	18	0.018
52629000	23	0.023
52825000	10	0.01
52941000	34	0.034
53325000	21	0.021
53586000	118	0.118
53753000	22	0.022
53851000	12	0.012
54069000	28	0.028
54079000	27	0.027
54187000	22	0.022
54245000	35	0.035
54268000	24	0.024
54359000	29	0.029
54670000	6	0.006
54708000	85	0.085
55424000	45	0.045
55440000	35	0.035
55602000	34	0.034
55633000	44	0.044
55753000	38	0.038
55914000	37	0.037
56155000	33	0.033
56323000	36	0.036
56337000	29	0.029
56348000	36	0.036
56389000	22	0.022
56716000	4	0.004
56753000	10	0.01
56767000	18	0.018
56780000	10	0.01
57127000	22	0.022
57696000	28	0.028
57921000	21	0.021
58152000	25	0.025
58461000	25	0.025
58570000	24	0.024
58579000	25	0.025
58673000	20	0.02
58801000	11	0.011
59036000	16	0.016
59089000	12	0.012
59247000	18	0.018
59332000	5	0.005
59468000	7	0.007
59840000	21	0.021
60021000	16	0.016
60043000	12	0.012
60264000	26	0.026
60384000	36	0.036
60412000	25	0.025
60421000	19	0.019
60492000	13	0.013
60502000	33	0.033
60546000	25	0.025
60710000	27	0.027
60980000	22	0.022
61224000	23	0.023
61484000	25	0.025
61710000	7	0.007
61858000	12	0.012
61999000	12	0.012
62062000	9	0.009
62518000	6	0.006
62600000	6	0.006
62661000	6	0.006
62856000	18	0.018
63099000	23	0.023
63291000	28	0.028
63502000	26	0.026
63514000	20	0.02
63524000	18	0.018
63556000	25	0.025
63587000	21	0.021
63619000	20	0.02
63668000	15	0.015
63799000	23	0.023
63905000	22	0.022
63956000	11	0.011
63984000	12	0.012
64055000	26	0.026
64076000	20	0.02
64085000	6	0.006
64154000	23	0.023
64436000	44	0.044
64594000	48	0.048
64821000	47	0.047
64907000	28	0.028
64994000	29	0.029
65158000	23	0.023
65287000	19	0.019
65316000	32	0.032
65886000	28	0.028
65993000	29	0.029
66160000	22	0.022
66214000	29	0.029
66257000	42	0.042
66360000	28	0.028
66443000	26	0.026
66678000	7	0.007
66883000	14	0.014
66948000	14	0.014
67131000	18	0.018
67174000	36	0.036
67349000	7	0.007
67363000	8	0.008
67386000	8	0.008
67394000	6	0.006
67684000	4	0.004
67735000	5	0.005
67748000	6	0.006
67786000	66	0.066
67813000	19	0.019
68017000	8	0.008
68068000	2	0.002
68156000	6	0.006
68371000	24	0.024
68558000	45	0.045
68585000	26	0.026
68659000	24	0.024
68716000	27	0.027
68772000	31	0.031
68796000	36	0.036
68849000	29	0.029
69186000	33	0.033
69206000	45	0.045
69427000	29	0.029
69469000	34	0.034
69522000	45	0.045
69916000	24	0.024
70040000	9	0.009
70254000	16	0.016
70281000	12	0.012
70510000	13	0.013
71395000	20	0.02
71613000	38	0.038
71656000	17	0.017
71813000	17	0.017
71843000	24	0.024
71847000	31	0.031
72363000	34	0.034
72401000	25	0.025
72553000	19	0.019
72621000	25	0.025
72771000	12	0.012
72781000	25	0.025
72790000	18	0.018
72809000	21	0.021
72814000	23	0.023
73016000	21	0.021
73099000	15	0.015
73341000	41	0.041
73387000	32	0.032
73539000	32	0.032
73586000	24	0.024
73919000	8	0.008
73957000	5	0.005
74145000	20	0.02
74690000	14	0.014
74723000	5	0.005
74965000	13	0.013
74988000	23	0.023
75149000	21	0.021
75747000	21	0.021
76027000	20	0.02
76038000	14	0.014
76552000	31	0.031
76593000	12	0.012
76661000	29	0.029
76715000	26	0.026
76921000	32	0.032
77079000	29	0.029
77170000	41	0.041
77216000	36	0.036
77434000	38	0.038
77599000	27	0.027
77846000	33	0.033
77997000	27	0.027
78000000	37	0.037
78143000	35	0.035
78246000	31	0.031
78408000	47	0.047
78485000	33	0.033
78563000	41	0.041
78671000	42	0.042
78677000	37	0.037
78705000	53	0.053
78820000	39	0.039
79136000	31	0.031
79252000	33	0.033
79344000	29	0.029
79710000	109	0.109
79805000	30	0.03
79882000	25	0.025
79913000	23	0.023
80060000	29	0.029
80383000	31	0.031
80468000	33	0.033
80617000	11	0.011
80839000	3	0.003
81246000	10	0.01
81454000	6	0.006
81480000	8	0.008
81525000	9	0.009
81658000	9	0.009
81819000	17	0.017
81897000	82	0.082
82050000	5	0.005
82083000	9	0.009
82193000	9	0.009
82414000	14	0.014
82669000	12	0.012
82783000	17	0.017
83014000	37	0.037
83028000	35	0.035
83167000	22	0.022
83523000	42	0.042
83579000	30	0.03
83905000	35	0.035
84083000	39	0.039
84088000	35	0.035
84249000	48	0.048
84331000	31	0.031
84367000	26	0.026
84376000	39	0.039
84643000	47	0.047
84759000	34	0.034
85146000	26	0.026
85157000	20	0.02
85402000	32	0.032
85438000	34	0.034
85442000	35	0.035
85507000	20	0.02
85575000	19	0.019
85633000	21	0.021
85701000	28	0.028
85721000	43	0.043
85774000	353	0.353
85905000	26	0.026
86394000	15	0.015
86401000	17	0.017
86419000	21	0.021
86467000	23	0.023
86843000	17	0.017
86884000	18	0.018
86897000	14	0.014
87010000	16	0.016
87058000	12	0.012
87453000	10	0.01
87524000	4	0.004
88046000	26	0.026
88090000	34	0.034
88304000	38	0.038
88388000	37	0.037
88652000	37	0.037
88661000	53	0.053
88719000	43	0.043
89050000	18	0.018
89240000	29	0.029
89392000	28	0.028
89401000	40	0.04
89472000	26	0.026
89697000	44	0.044
89717000	38	0.038
89765000	26	0.026
89793000	42	0.042
89936000	39	0.039
90062000	55	0.055
90131000	21	0.021
90143000	35	0.035
90146000	32	0.032
90513000	19	0.019
90516000	19	0.019
90644000	11	0.011
90952000	10	0.01
91370000	30	0.03
91535000	14	0.014
91718000	10	0.01
91790000	22	0.022
91894000	15	0.015
92023000	16	0.016
92335000	20	0.02
92364000	103	0.103
92420000	18	0.018
92454000	21	0.021
92651000	36	0.036
92672000	45	0.045
92714000	54	0.054
92914000	34	0.034
93265000	21	0.021
93543000	40	0.04
93582000	31	0.031
93589000	26	0.026
93743000	26	0.026
94240000	15	0.015
94604000	18	0.018
94735000	12	0.012
94968000	6	0.006
95024000	6	0.006
95433000	3	0.003
95736000	5	0.005
95798000	4	0.004
96194000	10	0.01
96282000	4	0.004
96324000	10	0.01
96334000	20	0.02
96409000	31	0.031
96603000	24	0.024
96871000	40	0.04
97085000	26	0.026
97140000	25	0.025
97179000	13	0.013
97306000	9	0.009
97414000	22	0.022
97627000	12	0.012
98157000	15	0.015
98528000	7	0.007
98751000	9	0.009
98756000	13	0.013
99139000	61	0.061
99434000	18	0.018
100305000	8	0.008
100358000	6	0.006
100737000	6	0.006
100867000	10	0.01
100941000	14	0.014
101321000	8	0.008
101492000	12	0.012
101552000	6	0.006
101671000	8	0.008
101703000	15	0.015
101810000	10	0.01
101851000	19	0.019
101882000	5	0.005
102377000	10	0.01
102769000	9	0.009
102990000	14	0.014
103221000	8	0.008
103262000	5	0.005
103400000	7	0.007
103591000	7	0.007
103610000	13	0.013
103848000	27	0.027
104000000	12	0.012
104056000	7	0.007
104166000	13	0.013
104174000	9	0.009
104213000	11	0.011
104301000	8	0.008
104539000	19	0.019
105034000	17	0.017
105162000	27	0.027
105176000	39	0.039
105267000	24	0.024
105462000	23	0.023
105594000	11	0.011
105615000	34	0.034
105633000	28	0.028
105925000	51	0.051
106228000	42	0.042
106241000	44	0.044
106384000	33	0.033
106601000	33	0.033
106702000	42	0.042
106712000	28	0.028
106726000	29	0.029
106861000	48	0.048
107097000	28	0.028
107594000	8	0.008
107762000	9	0.009
107772000	6	0.006
107884000	25	0.025
107932000	40	0.04
108000000	37	0.037
108130000	31	0.031
108178000	63	0.063
108213000	30	0.03
108226000	43	0.043
108573000	38	0.038
108667000	48	0.048
108862000	26	0.026
108955000	29	0.029
108957000	24	0.024
108970000	131	0.131
109347000	18	0.018
109435000	12	0.012
109490000	8	0.008
109604000	21	0.021
109605000	23	0.023
109696000	13	0.013
109859000	21	0.021
109904000	16	0.016
110100000	139	0.139
110243000	9	0.009
110616000	15	0.015
111100000	34	0.034
111152000	35	0.035
111196000	48	0.048
111229000	32	0.032
111429000	45	0.045
111432000	50	0.05
111572000	32	0.032
111620000	39	0.039
111734000	28	0.028
111741000	45	0.045
111809000	39	0.039
111895000	30	0.03
112010000	29	0.029
112083000	31	0.031
112355000	26	0.026
112562000	28	0.028
112599000	37	0.037
112629000	25	0.025
112652000	25	0.025
112971000	38	0.038
113526000	30	0.03
114112000	37	0.037
114243000	44	0.044
114288000	43	0.043
114319000	35	0.035
114646000	34	0.034
114715000	41	0.041
114865000	44	0.044
114926000	51	0.051
115072000	38	0.038
115184000	25	0.025
115333000	41	0.041
115596000	15	0.015
115763000	37	0.037
115862000	45	0.045
115982000	22	0.022
116085000	19	0.019
116123000	28	0.028
116142000	18	0.018
116228000	39	0.039
116307000	16	0.016
116484000	11	0.011
116513000	17	0.017
116558000	9	0.009
116733000	9	0.009
117009000	16	0.016
117339000	24	0.024
117476000	17	0.017
117505000	25	0.025
117573000	15	0.015
117908000	27	0.027
117927000	21	0.021
118147000	53	0.053
118213000	33	0.033
118345000	29	0.029
118623000	13	0.013
118625000	15	0.015
118674000	17	0.017
118701000	21	0.021
119046000	4	0.004
119287000	25	0.025
119536000	35	0.035
119557000	32	0.032
119666000	15	0.015
119840000	25	0.025
119911000	19	0.019
120395000	12	0.012
120506000	16	0.016
120518000	16	0.016
120653000	7	0.007
120912000	10	0.01
120994000	5	0.005
121132000	21	0.021
121255000	12	0.012
121403000	7	0.007
121446000	10	0.01
121646000	7	0.007
121805000	9	0.009
121893000	8	0.008
121898000	11	0.011
122052000	12	0.012
122197000	12	0.012
122347000	10	0.01
122466000	13	0.013
122729000	8	0.008
122946000	22	0.022
123023000	9	0.009
123246000	24	0.024
123738000	9	0.009
123767000	21	0.021
124046000	13	0.013
124227000	8	0.008
124256000	9	0.009
124332000	4	0.004
124458000	8	0.008
124467000	8	0.008
124481000	6	0.006
124608000	19	0.019
124691000	5	0.005
124701000	10	0.01
124819000	7	0.007
124991000	8	0.008
125048000	19	0.019
125281000	23	0.023
125479000	4	0.004
125499000	92	0.092
125732000	7	0.007
125739000	10	0.01
126075000	29	0.029
126274000	11	0.011
126300000	7	0.007
126313000	7	0.007
126434000	5	0.005
126536000	9	0.009
126668000	21	0.021
126746000	16	0.016
126860000	19	0.019
127078000	16	0.016
127256000	24	0.024
127271000	27	0.027
127381000	23	0.023
127628000	30	0.03
127698000	13	0.013
127700000	21	0.021
127711000	12	0.012
128624000	16	0.016
128639000	12	0.012
128703000	14	0.014
128724000	11	0.011
128816000	10	0.01
128978000	6	0.006
129008000	12	0.012
129064000	5	0.005
129066000	5	0.005
129071000	11	0.011
129121000	19	0.019
129389000	13	0.013
129422000	12	0.012
130640000	20	0.02
130870000	5	0.005
131026000	3	0.003
131044000	19	0.019
131752000	18	0.018
132139000	45	0.045
132260000	36	0.036
132452000	34	0.034
132556000	41	0.041
132569000	36	0.036
132697000	42	0.042
132840000	17	0.017
132951000	11	0.011
133000000	12	0.012
133218000	36	0.036
133428000	29	0.029
133555000	43	0.043
133669000	11	0.011
133699000	20	0.02
134065000	14	0.014
134382000	11	0.011
134541000	9	0.009
134618000	20	0.02
134703000	18	0.018
134874000	14	0.014
134974000	21	0.021
135057000	25	0.025
135061000	19	0.019
135624000	12	0.012
135679000	6	0.006
135849000	10	0.01
135913000	13	0.013
135932000	12	0.012
136029000	25	0.025
136077000	26	0.026
136231000	28	0.028
136262000	35	0.035
136359000	27	0.027
136476000	12	0.012
136893000	5	0.005
137042000	25	0.025
137067000	26	0.026
137250000	25	0.025
137296000	38	0.038
137338000	31	0.031
137490000	30	0.03
137517000	42	0.042
137693000	27	0.027
137703000	31	0.031
137704000	17	0.017
137815000	39	0.039
138230000	39	0.039
138301000	24	0.024
138405000	30	0.03
138532000	47	0.047
138764000	33	0.033
138942000	57	0.057
138950000	40	0.04
139220000	35	0.035
139413000	31	0.031
139551000	16	0.016
139599000	30	0.03
139668000	42	0.042
140094000	28	0.028
140097000	54	0.054
140148000	35	0.035
140158000	36	0.036
140203000	39	0.039
140530000	39	0.039
140619000	31	0.031
140907000	16	0.016
140916000	21	0.021
140941000	8	0.008
141000000	20	0.02
141107000	7	0.007
141120000	6	0.006
141254000	14	0.014
141370000	31	0.031
141976000	5	0.005
142029000	12	0.012
142152000	7	0.007
142213000	13	0.013
142248000	11	0.011
142473000	18	0.018
142830000	14	0.014
143816000	22	0.022
143834000	20	0.02
144165000	14	0.014
144317000	14	0.014
144480000	16	0.016
144541000	10	0.01
144562000	9	0.009
144661000	22	0.022
144834000	7	0.007
144963000	12	0.012
145044000	3	0.003
145069000	10	0.01
145245000	60	0.06
145502000	12	0.012
145573000	20	0.02
145822000	10	0.01
		21.297
		0.0219331

## Sheet: chr9_output
Position	Total number of SNVs per 1000 bases	Ratio
89000	6	0.006
217000	11	0.011
231000	10	0.01		ps: positions are from chromoome 9
266000	7	0.007
268000	7	0.007
333000	5	0.005
408000	12	0.012
553000	10	0.01
852000	16	0.016
903000	10	0.01
962000	12	0.012
1030000	11	0.011
1245000	25	0.025
1352000	25	0.025
1413000	36	0.036
1581000	25	0.025
1830000	15	0.015
1880000	32	0.032
2034000	3	0.003
2216000	12	0.012
2262000	8	0.008
2270000	16	0.016
2397000	15	0.015
2449000	10	0.01
2874000	22	0.022
3075000	25	0.025
3106000	19	0.019
3108000	24	0.024
3232000	8	0.008
3236000	10	0.01
3353000	2	0.002
3629000	11	0.011
3766000	25	0.025
3769000	20	0.02
3835000	15	0.015
3896000	15	0.015
3960000	14	0.014
4054000	9	0.009
4246000	8	0.008
4412000	11	0.011
4426000	14	0.014
4427000	20	0.02
4557000	6	0.006
4756000	7	0.007
4787000	13	0.013
5364000	3	0.003
5392000	6	0.006
5683000	12	0.012
5708000	4	0.004
5725000	7	0.007
5729000	8	0.008
5923000	22	0.022
6451000	7	0.007
6461000	3	0.003
6524000	7	0.007
6590000	3	0.003
6731000	9	0.009
7514000	20	0.02
7529000	26	0.026
7546000	11	0.011
7749000	19	0.019
7808000	18	0.018
7995000	18	0.018
8063000	25	0.025
8577000	27	0.027
8582000	13	0.013
8657000	23	0.023
8781000	19	0.019
8890000	14	0.014
8981000	21	0.021
9003000	23	0.023
9042000	22	0.022
9053000	24	0.024
9094000	32	0.032
9354000	24	0.024
9611000	16	0.016
9617000	26	0.026
9824000	18	0.018
9835000	15	0.015
9934000	12	0.012
9995000	21	0.021
10140000	19	0.019
10192000	23	0.023
10330000	25	0.025
10375000	15	0.015
10478000	15	0.015
11262000	29	0.029
11278000	20	0.02
11325000	20	0.02
11364000	27	0.027
11451000	21	0.021
11692000	25	0.025
11707000	26	0.026
11732000	24	0.024
11879000	16	0.016
12042000	13	0.013
12284000	27	0.027
12452000	17	0.017
12987000	10	0.01
13096000	7	0.007
13257000	6	0.006
13267000	4	0.004
13287000	14	0.014
13528000	16	0.016
13545000	21	0.021
13696000	21	0.021
13775000	13	0.013
13851000	17	0.017
13923000	18	0.018
14164000	10	0.01
14235000	6	0.006
14433000	11	0.011
14662000	10	0.01
14684000	4	0.004
14773000	9	0.009
14774000	13	0.013
14789000	25	0.025
14823000	47	0.047
14831000	28	0.028
15270000	14	0.014
15279000	8	0.008
15413000	8	0.008
15499000	5	0.005
15701000	10	0.01
15784000	24	0.024
15956000	6	0.006
16406000	10	0.01
17210000	9	0.009
17394000	55	0.055
17477000	20	0.02
17485000	11	0.011
17618000	22	0.022
17999000	8	0.008
18116000	15	0.015
18462000	17	0.017
18504000	92	0.092
18593000	8	0.008
18685000	16	0.016
19077000	5	0.005
19080000	18	0.018
19177000	7	0.007
19262000	1	0.001
19348000	6	0.006
19415000	7	0.007
19605000	12	0.012
19670000	20	0.02
19819000	19	0.019
19876000	9	0.009
19914000	18	0.018
20039000	19	0.019
20201000	25	0.025
20245000	18	0.018
20537000	3	0.003
20599000	5	0.005
20702000	5	0.005
20868000	3	0.003
20936000	12	0.012
21191000	21	0.021
21329000	6	0.006
21387000	6	0.006
21457000	10	0.01
21460000	9	0.009
21704000	9	0.009
21973000	4	0.004
22053000	3	0.003
22487000	23	0.023
22544000	24	0.024
22651000	16	0.016
22869000	15	0.015
22929000	20	0.02
22953000	15	0.015
23099000	36	0.036
23433000	28	0.028
23491000	26	0.026
23585000	23	0.023
23746000	30	0.03
23751000	31	0.031
24040000	47	0.047
24055000	28	0.028
24167000	30	0.03
24199000	45	0.045
24276000	34	0.034
24375000	34	0.034
24548000	33	0.033
24594000	31	0.031
24845000	31	0.031
24885000	32	0.032
24916000	41	0.041
24983000	34	0.034
25006000	36	0.036
25489000	29	0.029
25618000	16	0.016
25655000	16	0.016
26186000	38	0.038
26254000	13	0.013
26265000	29	0.029
26266000	20	0.02
26315000	25	0.025
26535000	16	0.016
26685000	20	0.02
26716000	16	0.016
26822000	12	0.012
26826000	10	0.01
26829000	9	0.009
26859000	6	0.006
26874000	5	0.005
27056000	40	0.04
27103000	8	0.008
27236000	15	0.015
27302000	7	0.007
27488000	6	0.006
27742000	18	0.018
27773000	15	0.015
27991000	20	0.02
28225000	30	0.03
28469000	25	0.025
28571000	16	0.016
28622000	21	0.021
28669000	22	0.022
28750000	32	0.032
28835000	14	0.014
28937000	17	0.017
29087000	37	0.037
29389000	31	0.031
29407000	9	0.009
29701000	25	0.025
29715000	22	0.022
29878000	25	0.025
30139000	26	0.026
30464000	24	0.024
30488000	28	0.028
30585000	28	0.028
30635000	23	0.023
30967000	13	0.013
31290000	25	0.025
31335000	12	0.012
31442000	11	0.011
31479000	15	0.015
31526000	12	0.012
31538000	17	0.017
31720000	10	0.01
31773000	17	0.017
31901000	23	0.023
32219000	23	0.023
32425000	44	0.044
32552000	12	0.012
32571000	31	0.031
32577000	10	0.01
32708000	10	0.01
32825000	9	0.009
32892000	13	0.013
33072000	7	0.007
33095000	12	0.012
33306000	6	0.006
33554000	9	0.009
33790000	10	0.01
33946000	6	0.006
33968000	5	0.005
34509000	8	0.008
34587000	4	0.004
34900000	8	0.008
35081000	5	0.005
35367000	11	0.011
35411000	12	0.012
35493000	7	0.007
35535000	8	0.008
35593000	9	0.009
35747000	1	0.001
35928000	10	0.01
36073000	7	0.007
36222000	60	0.06
36302000	7	0.007
36835000	18	0.018
36873000	15	0.015
36901000	15	0.015
37316000	11	0.011
37632000	15	0.015
37643000	12	0.012
37824000	2	0.002
37827000	6	0.006
37829000	4	0.004
38177000	7	0.007
38227000	3	0.003
38464000	9	0.009
38546000	12	0.012
38606000	16	0.016
38617000	14	0.014
38684000	11	0.011
38865000	5	0.005
39378000	3	0.003
39485000	5	0.005
40076000	2	0.002
40328000	20	0.02
40512000	2	0.002
40585000	9	0.009
40622000	9	0.009
42019000	13	0.013
42214000	6	0.006
43190000	5	0.005
43192000	2	0.002
43600000	9	0.009
43676000	11	0.011
43699000	8	0.008
43911000	11	0.011
43921000	1	0.001
44126000	21	0.021
44217000	33	0.033
44876000	50	0.05
44879000	36	0.036
44976000	4	0.004
45696000	7	0.007
47168000	21	0.021
65779000	3	0.003
65880000	2	0.002
66145000	2	0.002
67023000	1	0.001
67042000	5	0.005
67703000	5	0.005
67947000	4	0.004
68481000	82	0.082
68811000	16	0.016
69031000	37	0.037
69085000	21	0.021
69214000	6	0.006
69538000	8	0.008
69596000	6	0.006
69775000	12	0.012
69948000	21	0.021
70124000	2	0.002
70125000	7	0.007
70336000	5	0.005
70625000	3	0.003
70663000	5	0.005
70951000	11	0.011
71012000	6	0.006
71073000	8	0.008
71367000	14	0.014
71396000	7	0.007
71413000	14	0.014
71762000	9	0.009
72178000	4	0.004
72273000	20	0.02
72279000	6	0.006
72326000	4	0.004
72504000	9	0.009
72546000	31	0.031
72638000	10	0.01
72643000	21	0.021
72653000	29	0.029
72931000	7	0.007
72981000	10	0.01
73540000	14	0.014
73582000	15	0.015
73583000	12	0.012
73602000	8	0.008
73633000	18	0.018
73858000	11	0.011
74120000	22	0.022
74915000	18	0.018
75077000	7	0.007
75142000	8	0.008
75342000	5	0.005
75518000	11	0.011
75671000	9	0.009
75695000	15	0.015
75813000	20	0.02
76213000	18	0.018
76352000	22	0.022
76364000	30	0.03
76437000	23	0.023
76506000	28	0.028
76745000	18	0.018
76986000	30	0.03
76993000	25	0.025
77009000	25	0.025
77877000	14	0.014
77978000	30	0.03
78160000	20	0.02
78247000	17	0.017
78310000	24	0.024
78438000	24	0.024
78529000	27	0.027
78655000	21	0.021
79002000	28	0.028
79042000	16	0.016
79091000	9	0.009
79123000	10	0.01
79373000	18	0.018
79387000	13	0.013
79406000	8	0.008
79474000	9	0.009
79512000	12	0.012
79565000	15	0.015
79725000	25	0.025
80105000	14	0.014
80178000	16	0.016
80216000	15	0.015
80246000	9	0.009
80427000	7	0.007
80506000	5	0.005
80645000	8	0.008
80727000	10	0.01
81091000	17	0.017
81250000	18	0.018
81303000	33	0.033
82356000	17	0.017
82427000	13	0.013
82483000	23	0.023
82616000	17	0.017
83032000	23	0.023
83043000	19	0.019
83254000	26	0.026
83514000	21	0.021
83786000	14	0.014
84547000	24	0.024
84688000	11	0.011
84839000	15	0.015
84846000	21	0.021
84935000	14	0.014
84971000	8	0.008
85023000	23	0.023
85211000	11	0.011
85411000	11	0.011
85611000	33	0.033
85847000	7	0.007
85958000	73	0.073
86387000	11	0.011
86522000	5	0.005
86605000	9	0.009
86639000	9	0.009
86743000	18	0.018
86835000	9	0.009
86846000	9	0.009
87360000	12	0.012
87451000	8	0.008
87626000	4	0.004
87647000	13	0.013
87649000	13	0.013
87798000	16	0.016
87809000	11	0.011
87834000	12	0.012
87897000	16	0.016
87955000	19	0.019
88063000	11	0.011
88092000	4	0.004
88167000	6	0.006
88409000	9	0.009
88450000	3	0.003
88806000	8	0.008
88811000	16	0.016
88812000	11	0.011
88976000	7	0.007
89029000	14	0.014
89375000	15	0.015
89421000	22	0.022
89570000	11	0.011
89770000	11	0.011
89994000	11	0.011
90159000	6	0.006
90418000	6	0.006
90691000	14	0.014
90735000	24	0.024
90768000	12	0.012
90936000	10	0.01
91049000	9	0.009
91265000	9	0.009
91295000	23	0.023
91327000	12	0.012
91533000	18	0.018
91637000	9	0.009
91693000	12	0.012
92046000	5	0.005
92103000	5	0.005
92107000	10	0.01
92133000	4	0.004
92499000	10	0.01
92738000	18	0.018
92759000	9	0.009
92886000	10	0.01
93024000	9	0.009
93053000	9	0.009
93196000	22	0.022
93550000	11	0.011
93608000	15	0.015
93672000	13	0.013
93918000	12	0.012
93976000	13	0.013
94026000	10	0.01
94119000	9	0.009
94179000	6	0.006
94195000	8	0.008
94411000	10	0.01
94491000	8	0.008
94679000	12	0.012
94877000	45	0.045
94929000	14	0.014
95119000	8	0.008
95282000	4	0.004
95296000	5	0.005
95432000	13	0.013
95710000	13	0.013
95739000	9	0.009
95969000	6	0.006
96015000	27	0.027
96240000	9	0.009
96249000	10	0.01
96398000	19	0.019
97026000	6	0.006
97513000	10	0.01
97604000	4	0.004
98320000	6	0.006
98528000	10	0.01
98672000	2	0.002
98878000	6	0.006
98936000	10	0.01
98963000	9	0.009
98993000	13	0.013
99266000	39	0.039
99353000	2	0.002
99423000	9	0.009
99911000	13	0.013
100020000	3	0.003
100460000	8	0.008
100488000	5	0.005
100495000	14	0.014
100539000	9	0.009
100550000	25	0.025
100566000	8	0.008
100660000	7	0.007
100893000	45	0.045
101026000	11	0.011
101077000	14	0.014
101122000	5	0.005
101199000	8	0.008
101201000	5	0.005
101486000	14	0.014
101525000	5	0.005
101684000	13	0.013
101693000	14	0.014
101766000	17	0.017
101822000	31	0.031
101889000	3	0.003
101940000	16	0.016
101945000	7	0.007
101972000	9	0.009
101975000	10	0.01
102033000	15	0.015
102183000	22	0.022
102195000	13	0.013
102316000	14	0.014
102346000	14	0.014
102354000	14	0.014
102415000	13	0.013
102448000	17	0.017
102506000	9	0.009
102611000	10	0.01
102894000	10	0.01
102991000	11	0.011
103054000	51	0.051
103247000	6	0.006
103367000	11	0.011
103974000	13	0.013
104007000	12	0.012
104376000	19	0.019
104659000	26	0.026
104840000	17	0.017
104855000	31	0.031
104980000	18	0.018
105169000	12	0.012
105218000	38	0.038
105561000	27	0.027
105585000	28	0.028
105615000	21	0.021
105647000	30	0.03
105799000	32	0.032
105819000	31	0.031
105861000	46	0.046
106172000	24	0.024
106183000	32	0.032
106349000	42	0.042
106483000	43	0.043
106656000	27	0.027
106750000	38	0.038
106760000	18	0.018
106965000	23	0.023
107100000	26	0.026
107129000	18	0.018
107389000	23	0.023
107436000	13	0.013
107527000	4	0.004
107644000	8	0.008
107670000	8	0.008
107708000	6	0.006
107725000	4	0.004
107945000	17	0.017
108204000	9	0.009
108277000	5	0.005
108455000	9	0.009
108534000	17	0.017
108782000	12	0.012
109090000	21	0.021
109515000	11	0.011
109734000	29	0.029
109756000	7	0.007
109897000	9	0.009
109934000	2	0.002
109939000	10	0.01
110220000	17	0.017
110439000	10	0.01
110673000	17	0.017
110794000	18	0.018
110807000	14	0.014
111151000	9	0.009
111165000	11	0.011
111321000	9	0.009
112140000	8	0.008
112174000	10	0.01
112473000	9	0.009
112593000	4	0.004
112668000	14	0.014
112760000	12	0.012
113126000	15	0.015
113316000	19	0.019
113535000	10	0.01
113708000	11	0.011
113754000	8	0.008
113770000	14	0.014
113824000	18	0.018
113879000	23	0.023
113956000	26	0.026
114132000	7	0.007
114225000	4	0.004
114320000	9	0.009
114403000	35	0.035
114422000	3	0.003
114448000	6	0.006
114529000	6	0.006
114782000	10	0.01
114787000	6	0.006
114894000	9	0.009
114911000	66	0.066
114934000	8	0.008
115044000	6	0.006
115194000	5	0.005
115216000	39	0.039
115369000	10	0.01
115581000	4	0.004
115756000	19	0.019
116054000	10	0.01
116064000	7	0.007
116087000	7	0.007
116215000	3	0.003
116263000	10	0.01
116278000	9	0.009
116296000	6	0.006
116412000	3	0.003
116510000	25	0.025
117082000	10	0.01
117293000	9	0.009
117415000	15	0.015
117482000	12	0.012
117487000	16	0.016
117508000	9	0.009
117521000	16	0.016
117537000	15	0.015
117571000	15	0.015
117784000	9	0.009
117800000	24	0.024
117884000	11	0.011
117919000	9	0.009
118016000	15	0.015
118046000	18	0.018
118086000	13	0.013
118144000	22	0.022
118366000	18	0.018
118610000	13	0.013
118718000	25	0.025
119000000	27	0.027
119107000	14	0.014
119110000	22	0.022
119366000	14	0.014
119414000	21	0.021
119478000	8	0.008
119688000	40	0.04
119757000	38	0.038
119899000	27	0.027
120002000	21	0.021
120052000	35	0.035
120105000	23	0.023
120423000	32	0.032
120453000	26	0.026
120532000	30	0.03
120690000	31	0.031
120950000	17	0.017
121010000	16	0.016
121014000	20	0.02
121548000	40	0.04
121570000	31	0.031
121719000	28	0.028
121923000	24	0.024
121963000	32	0.032
122096000	31	0.031
122232000	23	0.023
122464000	19	0.019
122591000	15	0.015
122623000	16	0.016
122770000	30	0.03
122776000	34	0.034
122802000	23	0.023
123156000	72	0.072
123173000	25	0.025
123246000	6	0.006
123286000	4	0.004
123524000	3	0.003
123657000	11	0.011
123659000	11	0.011
123661000	9	0.009
123828000	8	0.008
123975000	5	0.005
124159000	5	0.005
124419000	4	0.004
124474000	6	0.006
124653000	8	0.008
125014000	19	0.019
125064000	7	0.007
125138000	6	0.006
125245000	9	0.009
125271000	25	0.025
125318000	13	0.013
125327000	26	0.026
125357000	25	0.025
125640000	6	0.006
125688000	2	0.002
125813000	6	0.006
125818000	6	0.006
125851000	2	0.002
125882000	10	0.01
125925000	3	0.003
125957000	6	0.006
126575000	6	0.006
127225000	12	0.012
127449000	9	0.009
127485000	4	0.004
127555000	7	0.007
127657000	19	0.019
127754000	9	0.009
127838000	6	0.006
127995000	41	0.041
128015000	14	0.014
128026000	9	0.009
128173000	7	0.007
128503000	5	0.005
128744000	15	0.015
128974000	15	0.015
129291000	13	0.013
129376000	30	0.03
129398000	10	0.01
129435000	13	0.013
129646000	5	0.005
129683000	8	0.008
129784000	7	0.007
129875000	6	0.006
129893000	5	0.005
129946000	9	0.009
129998000	6	0.006
130185000	2	0.002
130507000	367	0.367
130589000	4	0.004
130594000	4	0.004
130698000	20	0.02
130718000	3	0.003
130890000	16	0.016
131020000	37	0.037
131042000	7	0.007
131535000	9	0.009
131619000	10	0.01
131786000	9	0.009
131952000	9	0.009
131970000	8	0.008
131993000	14	0.014
132345000	11	0.011
132785000	9	0.009
132990000	2	0.002
133228000	8	0.008
133265000	11	0.011
133734000	4	0.004
133737000	9	0.009
133873000	9	0.009
134039000	16	0.016
134268000	8	0.008
134488000	3	0.003
134511000	9	0.009
134752000	11	0.011
134894000	12	0.012
134926000	9	0.009
134959000	12	0.012
135052000	9	0.009
135071000	11	0.011
135204000	77	0.077
135247000	3	0.003
135269000	5	0.005
135279000	4	0.004
135575000	16	0.016
135595000	17	0.017
135637000	12	0.012
135699000	12	0.012
135766000	4	0.004
135844000	10	0.01
135948000	13	0.013
135976000	32	0.032
136119000	12	0.012
136125000	10	0.01
136298000	44	0.044
136314000	56	0.056
136482000	17	0.017
136610000	14	0.014
136842000	9	0.009
137173000	14	0.014
137267000	2	0.002
137286000	11	0.011
137489000	18	0.018
137501000	18	0.018
137842000	21	0.021
138587000	31	0.031
138824000	8	0.008
138884000	14	0.014
138924000	3	0.003
139265000	98	0.098
139714000	5	0.005
139809000	7	0.007
139841000	13	0.013
139914000	24	0.024
140080000	21	0.021
140148000	4	0.004
140297000	7	0.007
140400000	81	0.081
140793000	13	0.013
140817000	31	0.031
140847000	8	0.008
140850000	41	0.041
141016000	85	0.085
141080000	6	0.006
141141000	1	0.001
		13.455
		0.0159609

[truncated: 15 more sheets: chr10_output, chr11_output, chr12_output, chr13_output, chr14_output, chr15_output, chr16_output, chr17_output, chr18_output, chr19_output, chr20_output, chr21_output, chr22_output, chrX_output, chY_output]
