# Supplementary material for: Investigation of somatic single nucleotide variations in human endogenous retrovirus elements and their potential association with cancer
Source: PLoS One. 2019 Apr 1;14(4):e0213770. doi: 10.1371/journal.pone.0213770 (PMC6443178; doi:10.1371/journal.pone.0213770)
Supplement: S4 Table — (XLSX) [file pone.0213770.s006.xlsx]

## Sheet: Sheet1
	HERV Sequence	HERV groups	HERVID	Chromosome	Length	Observed nsSNVs	Total number of bases in human protein region	Total nsSNVs in coding region	Ratio	Binomial Test	Expected nsSNVs	Difference
	canon	HERVW	4899	21	17	0	36983164	2867887	0.0775457	0.253549	1.31828	-1.31828		Note: Ratio = total bases of HERV in coding region / Total number of bases in human protein region
	noncanon	HML2	6171	1	20	0	36983164	2867887	0.0775457	0.19902	1.55091	-1.55091
	canon	HERVIP	3031	9	24	0	36983164	2867887	0.0775457	0.144104	1.8611	-1.8611		Length: the length of each HERV element
	canon	HML9	6249	1	45	0	36983164	2867887	0.0775457	0.0264556	3.48956	-3.48956
	noncanon	HML3	2476	7	51	0	36983164	2867887	0.0775457	0.0163	3.95483	-3.95483
	noncanon	HERVW	3772	12	52	0	36983164	2867887	0.0775457	0.015036	4.03238	-4.03238
	canon	HML6	4791	19	54	0	36983164	2867887	0.0775457	0.0127944	4.18747	-4.18747
	noncanon	HML3	2135	6	96	0	36983164	2867887	0.0775457	0.000431226	7.44439	-7.44439
	noncanon	HUERSP3	466	2	106	0	36983164	2867887	0.0775457	0.000192377	8.21985	-8.21985
	noncanon	HERVH	5918	1	109	0	36983164	2867887	0.0775457	0.000151004	8.45249	-8.45249
	noncanon	HERVH	967	3	143	0	36983164	2867887	0.0775457	9.7076e-06	11.089	-11.089
	canon	HERVH	5668	X	150	0	36983164	2867887	0.0775457	5.51729e-06	11.6319	-11.6319
	noncanon	HERVW	5881	1	174	0	36983164	2867887	0.0775457	7.95064e-07	13.493	-13.493
	noncanon	HERVH	4744	19	208	0	36983164	2867887	0.0775457	5.11124e-08	16.1295	-16.1295
	canon	HERVH	965	3	293	0	36983164	2867887	0.0775457	5.35596e-11	22.7209	-22.7209
	canon	HERVH48	4906	21	480	0	36983164	2867887	0.0775457	1.49115e-17	37.222	-37.222
	canon	HML10	2115	6	592	0	36983164	2867887	0.0775457	1.76744e-21	45.9071	-45.9071
	canon	MER41	5364	X	788	0	36983164	2867887	0.0775457	2.37976e-28	61.106	-61.106
	canon	HML10	2116	6	1184	0	36983164	2867887	0.0775457	3.12384e-42	91.8142	-91.8142
	canon	MER41	5365	X	1438	0	36983164	2867887	0.0775457	3.89653e-51	111.511	-111.511
	canon	MER41	5366	X	2008	0	36983164	2867887	0.0775457	4.06664e-71	155.712	-155.712
	noncanon	HARLEQUIN	2059	6	2164	0	36983164	2867887	0.0775457	1.38239e-76	167.809	-167.809
	canon	MER41	5367	X	2689	0	36983164	2867887	0.0775457	5.45344e-95	208.521	-208.521
	noncanon	HERVH	2061	6	10501	0	36983164	2867887	0.0775457	0	814.308	-814.308
	noncanon	HERVIP	2063	6	12173	0	36983164	2867887	0.0775457	0	943.964	-943.964
	noncanon	MER1	4711	19	17	1	36983164	2867887	0.0775457	0.362347	1.31828	-0.318278
	canon	LTR19	5722	X	309	1	36983164	2867887	0.0775457	3.82408e-10	23.9616	-22.9616
	canon	HERVH	1285	4	2001	1	36983164	2867887	0.0775457	1.2036e-68	155.169	-154.169
	noncanon	HERVW	946	3	67	2	36983164	2867887	0.0775457	0.0700034	5.19556	-3.19556
	noncanon	HERVH	3370	10	86	2	36983164	2867887	0.0775457	0.0249672	6.66893	-4.66893
	canon	MER4	4003	13	320	2	36983164	2867887	0.0775457	2.18517e-09	24.8146	-22.8146
	noncanon	HERVH	3901	12	406	2	36983164	2867887	0.0775457	3.40237e-12	31.4836	-29.4836
	noncanon	HERVH	4426	17	429	2	36983164	2867887	0.0775457	5.93517e-13	33.2671	-31.2671
	noncanon	HUERSP3	3409	11	504	2	36983164	2867887	0.0775457	1.92483e-15	39.0831	-37.0831
	noncanon	MER74	2382	6	91	3	36983164	2867887	0.0775457	0.0465953	7.05666	-4.05666
	noncanon	HERVW	1168	3	145	3	36983164	2867887	0.0775457	0.00244206	11.2441	-8.24413
	noncanon	HML2	4490	17	324	3	36983164	2867887	0.0775457	1.46359e-08	25.1248	-22.1248
	noncanon	HML6	4665	19	34	4	36983164	2867887	0.0775457	0.148892	2.63656	1.36344
	noncanon	HML3	3927	13	213	4	36983164	2867887	0.0775457	0.000142138	16.5172	-12.5172
	noncanon	HERVH48	6245	1	238	4	36983164	2867887	0.0775457	2.95405e-05	18.4559	-14.4559
	noncanon	HERVH	1520	4	98	5	36983164	2867887	0.0775457	0.104616	7.59948	-2.59948
	noncanon	HERVH	6283	22	192	5	36983164	2867887	0.0775457	0.00161065	14.8888	-9.88878
	noncanon	HERVH	2946	8	244	5	36983164	2867887	0.0775457	8.11829e-05	18.9212	-13.9212
	noncanon	HERVIP	3170	9	354	5	36983164	2867887	0.0775457	7.36297e-08	27.4512	-22.4512
	noncanon	MST	5833	1	159	6	36983164	2867887	0.0775457	0.0192091	12.3298	-6.32977
	noncanon	HML2	6062	1	420	6	36983164	2867887	0.0775457	4.91016e-09	32.5692	-26.5692
	noncanon	HML3	5892	1	136	7	36983164	2867887	0.0775457	0.0739566	10.5462	-3.54622
	noncanon	MLT	2030	5	1752	7	36983164	2867887	0.0775457	1.12913e-50	135.86	-128.86
	noncanon	HUERSP3	3648	11	96	8	36983164	2867887	0.0775457	0.142612	7.44439	0.555608
	noncanon	HERVH	3698	12	150	8	36983164	2867887	0.0775457	0.0723413	11.6319	-3.63186
	noncanon	MER84	934	3	217	8	36983164	2867887	0.0775457	0.00659777	16.8274	-8.82743
	noncanon	HERVW	2748	8	532	8	36983164	2867887	0.0775457	8.44046e-11	41.2543	-33.2543
	noncanon	HERVH	4713	19	333	10	36983164	2867887	0.0775457	0.000150726	25.8227	-15.8227
	noncanon	HERVFA	510	2	540	10	36983164	2867887	0.0775457	1.10691e-09	41.8747	-31.8747
	noncanon	HML2	864	3	769	10	36983164	2867887	0.0775457	3.65337e-16	59.6327	-49.6327
	noncanon	HML5	3866	12	233	11	36983164	2867887	0.0775457	0.0218052	18.0682	-7.06816
	noncanon	HERV9	3317	10	272	13	36983164	2867887	0.0775457	0.0163527	21.0924	-8.09244
	noncanon	HERVH	744	2	210	14	36983164	2867887	0.0775457	0.0914745	16.2846	-2.28461
	noncanon	HML8	3344	10	297	15	36983164	2867887	0.0775457	0.0189043	23.0311	-8.03109
	noncanon	HERVH	1262	3	300	18	36983164	2867887	0.0775457	0.0481285	23.2637	-5.26372
	noncanon	HML2	3340	10	349	19	36983164	2867887	0.0775457	0.0221479	27.0635	-8.06346
	noncanon	HERVH	5346	X	1932	19	36983164	2867887	0.0775457	1.41761e-43	149.818	-130.818
	noncanon	HERVH	2965	8	639	20	36983164	2867887	0.0775457	4.84663e-07	49.5517	-29.5517
	noncanon	HERVH	4185	14	669	23	36983164	2867887	0.0775457	1.66109e-06	51.8781	-28.8781
	noncanon	MLT	2692	8	359	26	36983164	2867887	0.0775457	0.0757107	27.8389	-1.83892
	noncanon	HERVH	4547	18	225	27	36983164	2867887	0.0775457	0.00697116	17.4478	9.55221
	noncanon	HERV9	4720	19	561	27	36983164	2867887	0.0775457	0.00161256	43.5032	-16.5032
	noncanon	MER4?	3314	10	426	28	36983164	2867887	0.0775457	0.0502419	33.0345	-5.03449
	noncanon	ERRANTI	5484	X	498	32	36983164	2867887	0.0775457	0.0379618	38.6178	-6.61778
	noncanon	HERV9	6114	1	264	35	36983164	2867887	0.0775457	0.000667317	20.4721	14.5279
	noncanon	HERVH	4184	14	1059	41	36983164	2867887	0.0775457	8.73728e-08	82.1209	-41.1209
	noncanon	HML5	3776	12	1983	44	36983164	2867887	0.0775457	4.14456e-27	153.773	-109.773
	canon	HERVFRD	2073	6	1614	47	36983164	2867887	0.0775457	8.7675e-17	125.159	-78.1588
	canon	HERV3	2521	7	1812	62	36983164	2867887	0.0775457	7.17014e-15	140.513	-78.5129
	noncanon	HML6	4481	17	1837	63	36983164	2867887	0.0775457	5.35661e-15	142.452	-79.4515
	noncanon	ERRANTI	1114	3	3141	63	36983164	2867887	0.0775457	7.73687e-46	243.571	-180.571
	noncanon	MST	4780	19	702	92	36983164	2867887	0.0775457	3.2642e-07	54.4371	37.5629
	noncanon	HERVE	4618	19	1805	94	36983164	2867887	0.0775457	4.37738e-06	139.97	-45.9701
	noncanon	HERVIP	4062	14	1044	116	36983164	2867887	0.0775457	2.58909e-05	80.9578	35.0422
	noncanon	HML3	4463	17	2256	195	36983164	2867887	0.0775457	0.00895286	174.943	20.0568
	noncanon	MLT	845	2	2658	200	36983164	2867887	0.0775457	0.0265508	206.117	-6.11659
	noncanon	HERVW	4673	19	1585	249	36983164	2867887	0.0775457	2.63836e-26	122.91	126.09
	canon	MER50	4790	19	13479	805	36983164	2867887	0.0775457	1.34343e-16	1045.24	-240.239
