# Supplementary material for: Investigation of somatic single nucleotide variations in human endogenous retrovirus elements and their potential association with cancer
Source: PLoS One. 2019 Apr 1;14(4):e0213770. doi: 10.1371/journal.pone.0213770 (PMC6443178; doi:10.1371/journal.pone.0213770)
Supplement: S5 Table — (XLSX) [file pone.0213770.s007.xlsx]

## Sheet: Sheet1
	HERV Sequence	HERVID	Chromosome	HERV Groups	Length	Observed SNVs	Total number of bases in human noncoding region	Total number of SNVs in noncoding region	Ratio	Binomial test	Expected SNVs	Difference
	noncanon	1782	5	HML1	17595	674	3160754733	59205289	0.0187314	7.25989e-64	329.579	344.421
	noncanon	1783	5	HERV9	13644	568	3160754733	59205289	0.0187314	2.08995e-65	255.571	312.429
	noncanon	2162	6	MER4	15322	588	3160754733	59205289	0.0187314	2.96234e-56	287.002	300.998
	canon	2161	6	MER52	11738	519	3160754733	59205289	0.0187314	7.47311e-68	219.869	299.131
	noncanon	2932	8	HERV4	11102	495	3160754733	59205289	0.0187314	6.82737e-66	207.956	287.044
	noncanon	3471	11	HML8	14742	560	3160754733	59205289	0.0187314	2.20123e-52	276.138	283.862
	noncanon	2495	7	HERVL	12852	523	3160754733	59205289	0.0187314	1.67306e-57	240.736	282.264
	noncanon	657	2	HERV9	10353	455	3160754733	59205289	0.0187314	4.72311e-59	193.926	261.074
	noncanon	2795	8	HML6	13074	503	3160754733	59205289	0.0187314	9.65318e-49	244.894	258.106
	noncanon	2924	8	HERV30	9225	430	3160754733	59205289	0.0187314	1.39073e-62	172.797	257.203
	noncanon	2118	6	HML6	9503	433	3160754733	59205289	0.0187314	2.21265e-60	178.004	254.996
	noncanon	1832	5	HML3	11198	463	3160754733	59205289	0.0187314	5.90385e-53	209.754	253.246
	canon	2666	7	HERVADP	7861	400	3160754733	59205289	0.0187314	4.53805e-68	147.247	252.753
	noncanon	2873	8	HERV4	10293	439	3160754733	59205289	0.0187314	1.04641e-53	192.802	246.198
	canon	1388	4	HERVFRD	10864	443	3160754733	59205289	0.0187314	2.87695e-49	203.498	239.502
	canon	2496	7	HERV9	7849	384	3160754733	59205289	0.0187314	3.38848e-61	147.023	236.977
	canon	3224	10	HERV9	9954	421	3160754733	59205289	0.0187314	1.03295e-50	186.452	234.548
	noncanon	3970	13	HERVADP	8576	392	3160754733	59205289	0.0187314	3.35244e-55	160.64	231.36
	canon	593	2	HERVIP	8325	384	3160754733	59205289	0.0187314	4.78824e-55	155.939	228.061
	canon	4467	17	MER41	11024	432	3160754733	59205289	0.0187314	5.14251e-44	206.495	225.505
	canon	2169	6	HERV9	9136	395	3160754733	59205289	0.0187314	6.62724e-50	171.13	223.87
	canon	2813	8	HERV9	8391	381	3160754733	59205289	0.0187314	4.81661e-53	157.175	223.825
	canon	2797	8	HML8	8827	388	3160754733	59205289	0.0187314	1.06541e-50	165.342	222.658
	noncanon	1201	3	HERV9	11764	441	3160754733	59205289	0.0187314	2.04322e-40	220.356	220.644
	noncanon	1774	5	HUERSP3	10995	425	3160754733	59205289	0.0187314	5.48567e-42	205.951	219.049
	noncanon	2903	8	HERV9	7706	362	3160754733	59205289	0.0187314	8.60709e-54	144.344	217.656
	noncanon	4471	17	HERV9	8561	377	3160754733	59205289	0.0187314	1.67635e-49	160.359	216.641
	noncanon	2886	8	HUERSP3	11304	428	3160754733	59205289	0.0187314	3.00553e-40	211.739	216.261
	noncanon	589	2	HERVL	8486	374	3160754733	59205289	0.0187314	3.33291e-49	158.954	215.046
	noncanon	4869	21	MER52	17676	545	3160754733	59205289	0.0187314	3.9841e-28	331.096	213.904
	noncanon	6146	1	HERV9	9551	392	3160754733	59205289	0.0187314	1.81174e-44	178.903	213.097
	noncanon	1924	5	PRIMA41	15979	512	3160754733	59205289	0.0187314	4.18277e-30	299.309	212.691
	noncanon	2240	6	HERV9	12242	442	3160754733	59205289	0.0187314	7.30672e-37	229.31	212.69
	canon	2934	8	MER50	9666	393	3160754733	59205289	0.0187314	1.11578e-43	181.057	211.943
	noncanon	4244	15	HERVL	10936	412	3160754733	59205289	0.0187314	2.31305e-38	204.846	207.154
	noncanon	996	3	HERV9	7895	355	3160754733	59205289	0.0187314	1.15578e-48	147.884	207.116
	noncanon	2675	7	HML6	26841	709	3160754733	59205289	0.0187314	3.60433e-19	502.769	206.231
	noncanon	5924	1	HERVH	9123	377	3160754733	59205289	0.0187314	1.7674e-43	170.886	206.114
	canon	1209	3	HERVFB	8450	364	3160754733	59205289	0.0187314	8.04528e-46	158.28	205.72
	canon	2608	7	HERV3	11232	416	3160754733	59205289	0.0187314	3.91376e-37	210.391	205.609
	noncanon	4851	20	MER66	9536	382	3160754733	59205289	0.0187314	3.70567e-41	178.622	203.378
	noncanon	2817	8	HERV9	10355	397	3160754733	59205289	0.0187314	1.2753e-38	193.963	203.037
	canon	1790	5	HERVFB	6467	323	3160754733	59205289	0.0187314	1.09911e-53	121.136	201.864
	noncanon	4193	14	PRIMA41	9255	375	3160754733	59205289	0.0187314	1.81139e-41	173.359	201.641
	canon	2860	8	HERV9	7729	341	3160754733	59205289	0.0187314	3.79096e-45	144.775	196.225
	canon	3761	12	HML8	9121	366	3160754733	59205289	0.0187314	1.12775e-39	170.849	195.151
	noncanon	3491	11	HERVH	9349	369	3160754733	59205289	0.0187314	1.54512e-38	175.12	193.88
	noncanon	1438	4	HERV9	14603	466	3160754733	59205289	0.0187314	2.99402e-27	273.534	192.466
	noncanon	3392	11	HERVFC	10322	383	3160754733	59205289	0.0187314	1.61458e-34	193.345	189.655
	canon	2153	6	HML2	10928	393	3160754733	59205289	0.0187314	1.09293e-32	204.696	188.304
	noncanon	3490	11	THE	16355	494	3160754733	59205289	0.0187314	5.87024e-24	306.352	187.648
	noncanon	4056	13	HERV9	12460	419	3160754733	59205289	0.0187314	6.47725e-29	233.393	185.607
	canon	2298	6	HERV9	9323	360	3160754733	59205289	0.0187314	8.13413e-36	174.633	185.367
	canon	2972	8	HERVH	5818	294	3160754733	59205289	0.0187314	5.01061e-50	108.979	185.021
	canon	2609	7	HERVH	6622	309	3160754733	59205289	0.0187314	1.12703e-45	124.039	184.961
	noncanon	2902	8	HERVFB	17708	516	3160754733	59205289	0.0187314	6.94502e-22	331.695	184.305
	canon	2688	8	HERVIP	8526	343	3160754733	59205289	0.0187314	1.58251e-37	159.704	183.296
	noncanon	1550	4	MER4	18418	528	3160754733	59205289	0.0187314	5.42595e-21	344.995	183.005
	noncanon	2667	7	HERVH	8660	345	3160754733	59205289	0.0187314	6.25864e-37	162.214	182.786
	noncanon	4549	18	ERV1_ARTIODACT	9792	366	3160754733	59205289	0.0187314	1.11951e-33	183.418	182.582
	noncanon	3978	13	HERV9	9166	354	3160754733	59205289	0.0187314	2.86155e-35	171.692	182.308
	noncanon	2891	8	HERVH	7025	313	3160754733	59205289	0.0187314	2.05357e-42	131.588	181.412
	noncanon	4669	19	HML2	8201	335	3160754733	59205289	0.0187314	6.21026e-38	153.616	181.384
	canon	780	2	HERVH	6500	302	3160754733	59205289	0.0187314	2.44414e-44	121.754	180.246
	noncanon	1778	5	HERVH	9145	350	3160754733	59205289	0.0187314	3.61656e-34	171.298	178.702
	noncanon	2821	8	HERV9	8332	334	3160754733	59205289	0.0187314	2.58288e-36	156.07	177.93
	noncanon	592	2	HERV9	7662	321	3160754733	59205289	0.0187314	1.99112e-38	143.52	177.48
	noncanon	766	2	HUERSP3	10726	378	3160754733	59205289	0.0187314	6.63974e-30	200.913	177.087
	canon	2159	6	HML3	8584	337	3160754733	59205289	0.0187314	5.81707e-35	160.79	176.21
	noncanon	6039	1	HML3	4883	266	3160754733	59205289	0.0187314	3.0064e-51	91.4653	174.535
	noncanon	3468	11	HUERSP3	8384	331	3160754733	59205289	0.0187314	8.19012e-35	157.044	173.956
	canon	4023	13	HERVFB	8468	332	3160754733	59205289	0.0187314	2.26722e-34	158.617	173.383
	canon	587	2	HERVH48	7601	315	3160754733	59205289	0.0187314	6.6307e-37	142.377	172.623
	canon	2548	7	HERVL	5684	279	3160754733	59205289	0.0187314	2.62378e-45	106.469	172.531
	noncanon	1205	3	HERVW	7022	304	3160754733	59205289	0.0187314	5.21647e-39	131.532	172.468
	noncanon	5987	1	HERV9	12361	404	3160754733	59205289	0.0187314	9.9686e-26	231.539	172.461
	noncanon	2017	5	HERVIP	13595	427	3160754733	59205289	0.0187314	6.36435e-24	254.653	172.347
	noncanon	3726	12	HERV9	10634	371	3160754733	59205289	0.0187314	1.29605e-28	199.189	171.811
	noncanon	2938	8	HERVH	9583	350	3160754733	59205289	0.0187314	1.61654e-30	179.503	170.497
	canon	4374	16	HERVT	9073	340	3160754733	59205289	0.0187314	1.23475e-31	169.95	170.05
	noncanon	2812	8	HERVIP	9733	352	3160754733	59205289	0.0187314	6.247e-30	182.312	169.688
	canon	1629	4	HERVH	8243	324	3160754733	59205289	0.0187314	8.69744e-34	154.403	169.597
	noncanon	2180	6	HERVIP	12561	404	3160754733	59205289	0.0187314	1.65535e-24	235.285	168.715
	canon	3760	12	HERVH	8635	330	3160754733	59205289	0.0187314	3.13802e-32	161.745	168.255
	noncanon	2157	6	HML8	11096	376	3160754733	59205289	0.0187314	9.58323e-27	207.843	168.157
	canon	833	2	HUERSP3	9289	342	3160754733	59205289	0.0187314	1.80286e-30	173.996	168.004
	canon	1224	3	HERVIP	8315	322	3160754733	59205289	0.0187314	1.77495e-32	155.751	166.249
	canon	782	2	HERVADP	8322	322	3160754733	59205289	0.0187314	2.04979e-32	155.883	166.117
	canon	1836	5	HML2	9398	342	3160754733	59205289	0.0187314	1.33657e-29	176.037	165.963
	noncanon	2815	8	HERV9	7214	301	3160754733	59205289	0.0187314	7.29988e-36	135.128	165.872
	noncanon	1773	5	HML3	9295	339	3160754733	59205289	0.0187314	1.59999e-29	174.108	164.892
	noncanon	1200	3	HERVW	7215	299	3160754733	59205289	0.0187314	3.87336e-35	135.147	163.853
	canon	3475	11	HML8	9035	333	3160754733	59205289	0.0187314	8.38687e-30	169.238	163.762
	noncanon	2501	7	HML3	7812	310	3160754733	59205289	0.0187314	4.08865e-33	146.33	163.67
	canon	3967	13	HERVW	8779	328	3160754733	59205289	0.0187314	2.24252e-30	164.443	163.557
	canon	1027	3	HERV9	7849	310	3160754733	59205289	0.0187314	9.05261e-33	147.023	162.977
	noncanon	3839	12	HERVH	7192	297	3160754733	59205289	0.0187314	1.16106e-34	134.716	162.284
	noncanon	4665	19	HML6	9541	341	3160754733	59205289	0.0187314	3.35348e-28	178.716	162.284
	noncanon	1219	3	HERVH	6987	293	3160754733	59205289	0.0187314	2.48281e-35	130.876	162.124
	noncanon	1031	3	HERV9	9566	341	3160754733	59205289	0.0187314	5.18559e-28	179.184	161.816
	noncanon	606	2	THE	13293	410	3160754733	59205289	0.0187314	9.74106e-22	248.996	161.004
	noncanon	4093	14	HML6	10521	358	3160754733	59205289	0.0187314	7.24187e-26	197.073	160.927
	noncanon	2421	7	HERVH	12393	392	3160754733	59205289	0.0187314	1.21442e-22	232.138	159.862
	noncanon	1198	3	HARLEQUIN	7846	306	3160754733	59205289	0.0187314	1.79326e-31	146.966	159.034
	noncanon	6088	1	HERVH	5693	264	3160754733	59205289	0.0187314	6.84165e-39	106.638	157.362
	canon	1208	3	HERVH	9914	342	3160754733	59205289	0.0187314	9.3586e-26	185.703	156.297
	canon	4529	18	MER51	7215	291	3160754733	59205289	0.0187314	2.42711e-32	135.147	155.853
	canon	2763	8	HERVE	8433	313	3160754733	59205289	0.0187314	1.25926e-28	157.962	155.038
	canon	2156	6	HML3	8596	316	3160754733	59205289	0.0187314	3.27062e-28	161.015	154.985
	canon	1621	4	HEPSI1	9353	330	3160754733	59205289	0.0187314	1.83011e-26	175.195	154.805
	noncanon	1505	4	HERVH	10850	358	3160754733	59205289	0.0187314	1.06494e-23	203.235	154.765
	canon	1617	4	HERVADP	8679	317	3160754733	59205289	0.0187314	7.55994e-28	162.57	154.43
	canon	1603	4	MER51	8686	317	3160754733	59205289	0.0187314	8.59206e-28	162.701	154.299
	noncanon	4673	19	HERVW	11082	361	3160754733	59205289	0.0187314	5.37899e-23	207.581	153.419
	noncanon	1365	4	HERVE	8429	311	3160754733	59205289	0.0187314	4.74831e-28	157.887	153.113
	noncanon	4466	17	HERVE	11742	373	3160754733	59205289	0.0187314	6.09335e-22	219.944	153.056
	canon	2822	8	HERV9	7046	285	3160754733	59205289	0.0187314	6.4845e-32	131.981	153.019
	canon	594	2	HML9	8226	307	3160754733	59205289	0.0187314	1.71088e-28	154.084	152.916
	noncanon	1602	4	HML3	8669	315	3160754733	59205289	0.0187314	2.47973e-27	162.382	152.618
	canon	1690	4	HUERSP3	7519	293	3160754733	59205289	0.0187314	3.60734e-30	140.841	152.159
	noncanon	734	2	HERV9	10375	346	3160754733	59205289	0.0187314	1.07696e-23	194.338	151.662
	canon	4034	13	PABL	10868	355	3160754733	59205289	0.0187314	7.80115e-23	203.573	151.427
	canon	1049	3	HERVL	6345	270	3160754733	59205289	0.0187314	1.03923e-33	118.851	151.149
	canon	3449	11	HERVH	6940	281	3160754733	59205289	0.0187314	1.44816e-31	129.996	151.004
	noncanon	1508	4	MER83	9505	329	3160754733	59205289	0.0187314	4.37506e-25	178.042	150.958
	noncanon	3473	11	HML8	7537	292	3160754733	59205289	0.0187314	1.11105e-29	141.178	150.822
	noncanon	1014	3	HERVW	16194	454	3160754733	59205289	0.0187314	7.76148e-17	303.336	150.664
	canon	3452	11	HERV9	9383	326	3160754733	59205289	0.0187314	3.969e-25	175.757	150.243
	noncanon	920	3	HERV9	7360	288	3160754733	59205289	0.0187314	5.71237e-30	137.863	150.137
	noncanon	1004	3	HERVH	8327	305	3160754733	59205289	0.0187314	4.61831e-27	155.976	149.024
	canon	3916	12	HERV9	7605	291	3160754733	59205289	0.0187314	9.31607e-29	142.452	148.548
	noncanon	781	2	MER57	9486	326	3160754733	59205289	0.0187314	2.11732e-24	177.686	148.314
	canon	2845	8	HERVL	6246	265	3160754733	59205289	0.0187314	6.29124e-33	116.996	148.004
	noncanon	851	3	HERVL	7915	296	3160754733	59205289	0.0187314	1.10198e-27	148.259	147.741
	noncanon	763	2	HERV9	8081	299	3160754733	59205289	0.0187314	3.09694e-27	151.368	147.632
	canon	655	2	HERVH	6376	267	3160754733	59205289	0.0187314	2.7245e-32	119.431	147.569
	noncanon	1673	4	HERV9	9387	323	3160754733	59205289	0.0187314	2.81015e-24	175.831	147.169
	noncanon	1599	4	HERVH	8855	313	3160754733	59205289	0.0187314	2.48341e-25	165.866	147.134
	noncanon	3422	11	HERV9	7099	280	3160754733	59205289	0.0187314	1.02411e-29	132.974	147.026
	canon	1761	5	HERVL	6210	263	3160754733	59205289	0.0187314	1.4105e-32	116.322	146.678
	noncanon	1396	4	HERVL	9957	333	3160754733	59205289	0.0187314	4.53657e-23	186.508	146.492
	noncanon	859	3	HERVL	8589	307	3160754733	59205289	0.0187314	1.3095e-25	160.884	146.116
	canon	2164	6	HERVH	6088	260	3160754733	59205289	0.0187314	8.94336e-33	114.037	145.963
	canon	1791	5	HERV9	4755	235	3160754733	59205289	0.0187314	6.10277e-39	89.0677	145.932
	canon	4013	13	HUERSP3	8307	301	3160754733	59205289	0.0187314	4.97036e-26	155.602	145.398
	noncanon	3964	13	HERV9	6888	274	3160754733	59205289	0.0187314	1.12666e-29	129.022	144.978
	noncanon	2276	6	HERVH	7966	293	3160754733	59205289	0.0187314	2.38304e-26	149.214	143.786
	canon	1007	3	HERVH	6674	268	3160754733	59205289	0.0187314	1.13538e-29	125.013	142.987
	canon	3564	11	MER52	10471	339	3160754733	59205289	0.0187314	2.47658e-21	196.136	142.864
	noncanon	3448	11	HERV9	7055	275	3160754733	59205289	0.0187314	1.82434e-28	132.15	142.85
	canon	1417	4	HERV9	8125	295	3160754733	59205289	0.0187314	1.1069e-25	152.192	142.808
	canon	654	2	MER50	8388	299	3160754733	59205289	0.0187314	7.9695e-25	157.119	141.881
	noncanon	2594	7	HERV9	10367	336	3160754733	59205289	0.0187314	3.12216e-21	194.188	141.812
	canon	4229	14	HERVT	10070	330	3160754733	59205289	0.0187314	1.39307e-21	188.625	141.375
	canon	2850	8	HML3	6611	265	3160754733	59205289	0.0187314	2.9901e-29	123.833	141.167
	canon	2542	7	HERV9	8731	304	3160754733	59205289	0.0187314	1.03459e-23	163.544	140.456
	noncanon	3461	11	PRIMA41	6650	265	3160754733	59205289	0.0187314	7.01778e-29	124.564	140.436
	noncanon	5997	1	HERVE	8509	299	3160754733	59205289	0.0187314	6.32665e-24	159.385	139.615
	noncanon	6231	1	HERVH	7778	285	3160754733	59205289	0.0187314	1.88494e-25	145.693	139.307
	canon	894	3	HERVH	7959	288	3160754733	59205289	0.0187314	6.49356e-25	149.083	138.917
	noncanon	4676	19	HERVT	9566	318	3160754733	59205289	0.0187314	9.40611e-22	179.184	138.816
	noncanon	4666	19	HARLEQUIN	7058	271	3160754733	59205289	0.0187314	3.86027e-27	132.206	138.794
	canon	1011	3	HERVIP	8684	301	3160754733	59205289	0.0187314	3.21623e-23	162.663	138.337
	noncanon	1741	4	HML2	7296	275	3160754733	59205289	0.0187314	2.35646e-26	136.664	138.336
	canon	2277	6	MER51	6837	266	3160754733	59205289	0.0187314	1.73758e-27	128.066	137.934
	noncanon	1223	3	HML3	6897	267	3160754733	59205289	0.0187314	2.83426e-27	129.19	137.81
	noncanon	1779	5	HERV9	5092	233	3160754733	59205289	0.0187314	9.63494e-34	95.3802	137.62
	canon	2275	6	HERVH	6488	259	3160754733	59205289	0.0187314	2.20872e-28	121.529	137.471
	noncanon	3441	11	HERV9	9332	312	3160754733	59205289	0.0187314	9.88088e-22	174.801	137.199
	canon	2824	8	HERV9	9517	315	3160754733	59205289	0.0187314	2.65361e-21	178.267	136.733
	noncanon	4861	21	THE	10721	337	3160754733	59205289	0.0187314	2.16817e-19	200.819	136.181
	canon	3020	9	HERV9	9230	309	3160754733	59205289	0.0187314	1.26636e-21	172.891	136.109
	noncanon	2939	8	MER51	7288	272	3160754733	59205289	0.0187314	1.72672e-25	136.514	135.486
	noncanon	2885	8	HERV9	10944	340	3160754733	59205289	0.0187314	7.83379e-19	204.996	135.004
	noncanon	1724	4	HERVH	7809	281	3160754733	59205289	0.0187314	5.04602e-24	146.273	134.727
	canon	4670	19	HERVH	6751	261	3160754733	59205289	0.0187314	1.25342e-26	126.456	134.544
	noncanon	1389	4	HML3	6976	265	3160754733	59205289	0.0187314	6.11846e-26	130.67	134.33
	canon	3349	10	HERVH	6302	252	3160754733	59205289	0.0187314	8.98004e-28	118.045	133.955
	noncanon	1368	4	HML3	9007	302	3160754733	59205289	0.0187314	2.83307e-21	168.714	133.286
	canon	6143	1	HERVL	6572	256	3160754733	59205289	0.0187314	1.32445e-26	123.103	132.897
	noncanon	1274	3	HERVH	9082	303	3160754733	59205289	0.0187314	4.84504e-21	170.118	132.882
	canon	6148	1	MER50	6600	256	3160754733	59205289	0.0187314	2.36681e-26	123.627	132.373
	noncanon	2492	7	HERVH	6067	246	3160754733	59205289	0.0187314	5.57228e-28	113.643	132.357
	noncanon	1194	3	HERVH	8535	292	3160754733	59205289	0.0187314	8.18348e-22	159.872	132.128
	noncanon	3836	12	HERVH	9505	310	3160754733	59205289	0.0187314	4.01208e-20	178.042	131.958
	canon	897	3	HEPSI2	7214	267	3160754733	59205289	0.0187314	1.44798e-24	135.128	131.872
	canon	2963	8	HERVH	6416	252	3160754733	59205289	0.0187314	1.04457e-26	120.181	131.819
	canon	916	3	HEPSI1	8499	291	3160754733	59205289	0.0187314	8.58108e-22	159.198	131.802
	canon	1721	4	HERVH	6645	256	3160754733	59205289	0.0187314	5.95688e-26	124.47	131.53
	noncanon	2471	7	PRIMA41	12655	368	3160754733	59205289	0.0187314	4.00191e-16	237.046	130.954
	canon	2814	8	HERVH	6575	254	3160754733	59205289	0.0187314	6.32211e-26	123.159	130.841
	noncanon	2668	7	HERVH	7750	276	3160754733	59205289	0.0187314	5.03222e-23	145.168	130.832
	canon	6139	1	HERVFRD	8552	291	3160754733	59205289	0.0187314	1.98443e-21	160.191	130.809
	noncanon	1002	3	THE	13520	384	3160754733	59205289	0.0187314	2.49783e-15	253.248	130.752
	noncanon	2825	8	HERV9	7810	277	3160754733	59205289	0.0187314	7.33688e-23	146.292	130.708
	noncanon	1574	4	HERVH	9809	314	3160754733	59205289	0.0187314	2.94366e-19	183.736	130.264
	canon	1834	5	MER52	8167	283	3160754733	59205289	0.0187314	6.09096e-22	152.979	130.021
	canon	2211	6	HUERSP3	9640	310	3160754733	59205289	0.0187314	2.6594e-19	180.57	129.43
	noncanon	1033	3	HERVH	8042	280	3160754733	59205289	0.0187314	5.2529e-22	150.638	129.362
	noncanon	2971	8	HERVH	4983	222	3160754733	59205289	0.0187314	1.08612e-30	93.3385	128.662
	noncanon	1601	4	ERV1_ARTIODACT	8352	285	3160754733	59205289	0.0187314	3.41618e-21	156.444	128.556
	noncanon	2836	8	MER34	10437	324	3160754733	59205289	0.0187314	5.27746e-18	195.499	128.501
	canon	6254	1	HERVL	5688	235	3160754733	59205289	0.0187314	6.8166e-28	106.544	128.456
	noncanon	2864	8	HERVL	7256	264	3160754733	59205289	0.0187314	2.51397e-23	135.915	128.085
	canon	3816	12	HERVH	6352	247	3160754733	59205289	0.0187314	1.21122e-25	118.982	128.018
	noncanon	3456	11	HML7	11748	348	3160754733	59205289	0.0187314	2.11087e-16	220.056	127.944
	noncanon	3966	13	HML3	8296	283	3160754733	59205289	0.0187314	4.84448e-21	155.396	127.604
	noncanon	2761	8	HERV9	7080	260	3160754733	59205289	0.0187314	1.57055e-23	132.618	127.382
	canon	1746	5	HERVL	6547	250	3160754733	59205289	0.0187314	6.92621e-25	122.634	127.366
	noncanon	1148	3	HERV9	8044	278	3160754733	59205289	0.0187314	1.93023e-21	150.675	127.325
	noncanon	5988	1	HML6	7757	272	3160754733	59205289	0.0187314	7.74579e-22	145.299	126.701
	noncanon	4231	14	THE	13363	377	3160754733	59205289	0.0187314	1.04227e-14	250.307	126.693
	noncanon	478	2	MER57	7449	266	3160754733	59205289	0.0187314	2.02582e-22	139.53	126.47
	canon	1392	4	HERV9	5453	228	3160754733	59205289	0.0187314	8.55314e-28	102.142	125.858
	canon	778	2	HERVH	6364	245	3160754733	59205289	0.0187314	6.91736e-25	119.206	125.794
	canon	2209	6	HML8	9144	297	3160754733	59205289	0.0187314	3.88056e-19	171.28	125.72
	noncanon	1086	3	HERV1	10384	320	3160754733	59205289	0.0187314	2.1385e-17	194.507	125.493
	canon	2687	8	HERVH	6811	253	3160754733	59205289	0.0187314	1.36641e-23	127.579	125.421
	noncanon	2216	6	HML5	8238	279	3160754733	59205289	0.0187314	2.26921e-20	154.309	124.691
	noncanon	2626	7	MER57	6979	255	3160754733	59205289	0.0187314	7.74595e-23	130.726	124.274
	noncanon	1390	4	MLT	11749	344	3160754733	59205289	0.0187314	1.37035e-15	220.075	123.925
	noncanon	3985	13	HERVW	6814	251	3160754733	59205289	0.0187314	5.87581e-23	127.636	123.364
	noncanon	2875	8	HERVH	6932	253	3160754733	59205289	0.0187314	1.29764e-22	129.846	123.154
	canon	3445	11	HERVL	6736	249	3160754733	59205289	0.0187314	5.53202e-23	126.175	122.825
	noncanon	4852	20	HERVW	5830	232	3160754733	59205289	0.0187314	1.81156e-25	109.204	122.796
	canon	1151	3	HERVH	5694	229	3160754733	59205289	0.0187314	9.6294e-26	106.656	122.344
	noncanon	2900	8	HML3	6175	238	3160754733	59205289	0.0187314	2.67783e-24	115.666	122.334
	noncanon	658	2	HML3	5054	217	3160754733	59205289	0.0187314	5.41993e-28	94.6684	122.332
	noncanon	2262	6	HERVH	12370	354	3160754733	59205289	0.0187314	1.03914e-14	231.707	122.293
	noncanon	2251	6	HERV9	9332	297	3160754733	59205289	0.0187314	5.16464e-18	174.801	122.199
	noncanon	4043	13	HERVW	5761	230	3160754733	59205289	0.0187314	1.9166e-25	107.911	122.089
	noncanon	850	3	HERVH	8756	286	3160754733	59205289	0.0187314	8.2104e-19	164.012	121.988
	noncanon	6136	1	HERV9	6843	250	3160754733	59205289	0.0187314	2.00614e-22	128.179	121.821
	noncanon	2010	5	HERVH	7571	263	3160754733	59205289	0.0187314	1.12593e-20	141.815	121.185
	noncanon	1793	5	HML2	10841	324	3160754733	59205289	0.0187314	6.78441e-16	203.067	120.933
	noncanon	1598	4	MER4	7747	266	3160754733	59205289	0.0187314	2.96345e-20	145.112	120.888
	noncanon	2193	6	HERVL	8195	274	3160754733	59205289	0.0187314	2.39336e-19	153.504	120.496
	noncanon	2823	8	HARLEQUIN	12474	354	3160754733	59205289	0.0187314	2.94048e-14	233.655	120.345
	noncanon	1366	4	HERVH	4278	200	3160754733	59205289	0.0187314	2.10837e-30	80.1328	119.867
	noncanon	2689	8	HML5	6265	237	3160754733	59205289	0.0187314	3.38203e-23	117.352	119.648
	noncanon	2607	7	HERVW	5482	222	3160754733	59205289	0.0187314	2.18693e-25	102.685	119.315
	canon	521	2	HUERSP3	9180	291	3160754733	59205289	0.0187314	1.76132e-17	171.954	119.046
	noncanon	3615	11	HUERSP3	10412	314	3160754733	59205289	0.0187314	6.04272e-16	195.031	118.969
	canon	2261	6	HERVL	7267	255	3160754733	59205289	0.0187314	1.21372e-20	136.121	118.879
	canon	3558	11	HERVADP	5510	222	3160754733	59205289	0.0187314	4.0854e-25	103.21	118.79
	canon	3562	11	HERVH	6484	240	3160754733	59205289	0.0187314	2.68125e-22	121.454	118.546
	noncanon	1164	3	HERV9	7502	259	3160754733	59205289	0.0187314	4.58381e-20	140.523	118.477
	canon	1436	4	MER51	9800	302	3160754733	59205289	0.0187314	1.54299e-16	183.567	118.433
	noncanon	4548	18	HERVH	7850	265	3160754733	59205289	0.0187314	2.76967e-19	147.041	117.959
	canon	1199	3	HERVH	4507	202	3160754733	59205289	0.0187314	1.99465e-28	84.4223	117.578
	noncanon	3470	11	HUERSP3	6928	247	3160754733	59205289	0.0187314	6.941e-21	129.771	117.229
	canon	3565	11	HERVH	6557	240	3160754733	59205289	0.0187314	1.0416e-21	122.822	117.178
	noncanon	3283	10	HERV9	9140	287	3160754733	59205289	0.0187314	8.89011e-17	171.205	115.795
	noncanon	3838	12	HARLEQUIN	6232	232	3160754733	59205289	0.0187314	6.41819e-22	116.734	115.266
	noncanon	2933	8	HERVH	5700	222	3160754733	59205289	0.0187314	2.43054e-23	106.769	115.231
	canon	2312	6	HERVIP	7196	250	3160754733	59205289	0.0187314	9.20258e-20	134.791	115.209
	noncanon	3971	13	HERVH	6939	245	3160754733	59205289	0.0187314	3.127e-20	129.977	115.023
	noncanon	5812	1	MER31	14688	390	3160754733	59205289	0.0187314	8.00121e-12	275.126	114.874
	noncanon	4688	19	HML8	8448	273	3160754733	59205289	0.0187314	1.67757e-17	158.243	114.757
	canon	4494	18	HERVL	6529	237	3160754733	59205289	0.0187314	4.89698e-21	122.297	114.703
	canon	1620	4	HERVH	6169	230	3160754733	59205289	0.0187314	7.97367e-22	115.554	114.446
	noncanon	4870	21	HERV9	9591	294	3160754733	59205289	0.0187314	6.92229e-16	179.653	114.347
	noncanon	1903	5	HML3	10047	302	3160754733	59205289	0.0187314	2.98704e-15	188.194	113.806
	noncanon	3762	12	HML2	9193	286	3160754733	59205289	0.0187314	2.97299e-16	172.198	113.802
	noncanon	4096	14	HERVL	12583	349	3160754733	59205289	0.0187314	6.62796e-13	235.697	113.303
	noncanon	3818	12	HERVH	7045	245	3160754733	59205289	0.0187314	1.84746e-19	131.963	113.037
	canon	695	2	HERVH	6032	226	3160754733	59205289	0.0187314	9.94413e-22	112.988	113.012
	noncanon	3458	11	MLT	8009	263	3160754733	59205289	0.0187314	9.74942e-18	150.02	112.98
	noncanon	6255	1	HARLEQUIN	7336	250	3160754733	59205289	0.0187314	8.769e-19	137.413	112.587
	noncanon	717	2	HERV4	10235	304	3160754733	59205289	0.0187314	9.7969e-15	191.716	112.284
	noncanon	4036	13	HERVS	10934	317	3160754733	59205289	0.0187314	4.86161e-14	204.809	112.191
	noncanon	4694	19	HML8	8003	262	3160754733	59205289	0.0187314	1.59073e-17	149.907	112.093
	canon	2962	8	HERVH	6689	237	3160754733	59205289	0.0187314	8.19455e-20	125.294	111.706
	noncanon	2184	6	HUERSP2	12678	349	3160754733	59205289	0.0187314	1.57492e-12	237.476	111.524
	noncanon	5999	1	HERV9	8941	279	3160754733	59205289	0.0187314	4.67236e-16	167.477	111.523
	canon	2844	8	HERVL	6115	226	3160754733	59205289	0.0187314	4.81705e-21	114.542	111.458
	noncanon	4029	13	HERVH	9003	280	3160754733	59205289	0.0187314	6.09952e-16	168.639	111.361
	noncanon	4321	15	HERVH	9654	292	3160754733	59205289	0.0187314	4.00684e-15	180.833	111.167
	canon	4024	13	HERVH	5660	217	3160754733	59205289	0.0187314	4.48145e-22	106.02	110.98
	noncanon	4401	16	HERVH	8466	269	3160754733	59205289	0.0187314	1.95432e-16	158.58	110.42
	canon	1632	4	HERVE	8376	267	3160754733	59205289	0.0187314	1.73634e-16	156.894	110.106
	canon	1225	3	HERVH	8485	269	3160754733	59205289	0.0187314	2.5182e-16	158.936	110.064
	noncanon	3814	12	HERV35	8277	265	3160754733	59205289	0.0187314	1.36087e-16	155.04	109.96
	canon	1687	4	HERVH	5929	221	3160754733	59205289	0.0187314	4.85248e-21	111.058	109.942
	canon	890	3	HERVH	5206	207	3160754733	59205289	0.0187314	6.59594e-23	97.5155	109.484
	canon	3261	10	HERVH	5166	206	3160754733	59205289	0.0187314	6.02445e-23	96.7663	109.234
	noncanon	3992	13	HUERSP2	7736	254	3160754733	59205289	0.0187314	3.39299e-17	144.906	109.094
	noncanon	995	3	HERVE	7791	255	3160754733	59205289	0.0187314	4.21569e-17	145.936	109.064
	noncanon	1506	4	HERVH	8605	270	3160754733	59205289	0.0187314	7.12745e-16	161.184	108.816
	canon	1159	3	HUERSP2	7022	240	3160754733	59205289	0.0187314	2.94625e-18	131.532	108.468
	canon	4204	14	HERVH	6118	223	3160754733	59205289	0.0187314	4.07527e-20	114.599	108.401
	noncanon	1591	4	HML3	6213	224	3160754733	59205289	0.0187314	1.14233e-19	116.378	107.622
	canon	2042	5	HERVFB	8087	259	3160754733	59205289	0.0187314	2.79471e-16	151.481	107.519
	canon	1954	5	HERV9	10012	295	3160754733	59205289	0.0187314	5.62764e-14	187.539	107.461
	noncanon	5978	1	HERV9	6016	220	3160754733	59205289	0.0187314	4.97195e-20	112.688	107.312
	canon	1202	3	HERVH	5652	213	3160754733	59205289	0.0187314	7.08347e-21	105.87	107.13
	canon	1676	4	HERVH	5460	209	3160754733	59205289	0.0187314	2.9171e-21	102.273	106.727
	canon	3915	12	HERVE	8348	263	3160754733	59205289	0.0187314	1.0416e-15	156.37	106.63
	noncanon	3492	11	HERVH	5634	212	3160754733	59205289	0.0187314	1.02505e-20	105.533	106.467
	noncanon	5998	1	HERVH	6347	225	3160754733	59205289	0.0187314	6.11691e-19	118.888	106.112
	noncanon	4668	19	RHERVI	5282	205	3160754733	59205289	0.0187314	1.51878e-21	98.9391	106.061
	canon	2263	6	HERVH	6411	226	3160754733	59205289	0.0187314	9.48545e-19	120.087	105.913
	canon	2167	6	HERVH	5731	213	3160754733	59205289	0.0187314	3.23621e-20	107.35	105.65
	canon	3269	10	HERV9	9320	280	3160754733	59205289	0.0187314	2.85438e-14	174.576	105.424
	canon	3984	13	HERVL	6656	230	3160754733	59205289	0.0187314	4.27579e-18	124.676	105.324
	noncanon	1158	3	HERVL	8056	256	3160754733	59205289	0.0187314	9.51126e-16	150.9	105.1
	noncanon	1592	4	HERVL	7473	245	3160754733	59205289	0.0187314	1.36519e-16	139.98	105.02
	noncanon	1823	5	HERV9	9881	290	3160754733	59205289	0.0187314	1.36402e-13	185.085	104.915
	noncanon	1545	4	HERV4	8072	256	3160754733	59205289	0.0187314	1.17761e-15	151.2	104.8
	noncanon	3616	11	HERV9	5677	211	3160754733	59205289	0.0187314	4.77462e-20	106.338	104.662
	noncanon	4473	17	HERVH	6587	228	3160754733	59205289	0.0187314	4.91604e-18	123.384	104.616
	noncanon	464	2	HERVL	6383	224	3160754733	59205289	0.0187314	2.16484e-18	119.562	104.438
	canon	5945	1	HERVH	6245	221	3160754733	59205289	0.0187314	1.46911e-18	116.977	104.023
	canon	1393	4	HERVH48	5072	199	3160754733	59205289	0.0187314	1.77548e-21	95.0055	103.994
	canon	1758	5	HERVH	4916	196	3160754733	59205289	0.0187314	6.33271e-22	92.0835	103.917
	noncanon	3425	11	HERVH	9800	287	3160754733	59205289	0.0187314	2.2558e-13	183.567	103.433
	canon	2641	7	HERVL	6786	230	3160754733	59205289	0.0187314	3.38265e-17	127.111	102.889
	canon	1688	4	HERVH	7375	241	3160754733	59205289	0.0187314	3.32417e-16	138.144	102.856
	noncanon	1048	3	HML3	6846	231	3160754733	59205289	0.0187314	4.66346e-17	128.235	102.765
	canon	2248	6	HERVT	8675	265	3160754733	59205289	0.0187314	2.27242e-14	162.495	102.505
	canon	4642	19	HML8	9321	277	3160754733	59205289	0.0187314	1.21918e-13	174.595	102.405
	canon	1553	4	HERVIP	8846	268	3160754733	59205289	0.0187314	3.94979e-14	165.698	102.302
	canon	2772	8	HERV9	9221	275	3160754733	59205289	0.0187314	1.01996e-13	172.722	102.278
	noncanon	2420	7	HERVH	7035	234	3160754733	59205289	0.0187314	1.35956e-16	131.775	102.225
	noncanon	3263	10	HERV9	7302	239	3160754733	59205289	0.0187314	3.67569e-16	136.777	102.223
	canon	1428	4	HEPSI3	4851	193	3160754733	59205289	0.0187314	1.59427e-21	90.8659	102.134
	noncanon	1371	4	HERV9	9502	280	3160754733	59205289	0.0187314	2.22962e-13	177.986	102.014
	canon	2605	7	HERVL	7010	233	3160754733	59205289	0.0187314	1.69112e-16	131.307	101.693
	canon	1324	4	HERVH	6535	224	3160754733	59205289	0.0187314	2.61275e-17	122.41	101.59
	canon	2554	7	HERV9	6819	229	3160754733	59205289	0.0187314	1.03095e-16	127.729	101.271
	noncanon	1047	3	RHERVI	9285	275	3160754733	59205289	0.0187314	2.0968e-13	173.921	101.079
	noncanon	4640	19	HML1	12076	327	3160754733	59205289	0.0187314	3.99608e-11	226.2	100.8
	canon	2107	6	HERVH	7331	238	3160754733	59205289	0.0187314	9.82263e-16	137.32	100.68
	noncanon	1627	4	HML3	5359	201	3160754733	59205289	0.0187314	1.3326e-19	100.381	100.619
	canon	577	2	HERVW	7556	242	3160754733	59205289	0.0187314	2.37619e-15	141.534	100.466
	canon	2849	8	MER50	6663	225	3160754733	59205289	0.0187314	1.05443e-16	124.807	100.193
	canon	3732	12	HUERSP3	10454	296	3160754733	59205289	0.0187314	3.5703e-12	195.818	100.182
	canon	2876	8	HERVH	4903	192	3160754733	59205289	0.0187314	1.04466e-20	91.8399	100.16
	noncanon	3991	13	HERVE	8329	256	3160754733	59205289	0.0187314	3.16543e-14	156.014	99.9864
	canon	3326	10	HERV9	10095	289	3160754733	59205289	0.0187314	2.02278e-12	189.093	99.9067
	noncanon	4027	13	HERV9	7322	237	3160754733	59205289	0.0187314	1.52237e-15	137.151	99.8489
	canon	3672	11	HERVH	6898	229	3160754733	59205289	0.0187314	3.38477e-16	129.209	99.791
	noncanon	1748	5	HERVH	8521	259	3160754733	59205289	0.0187314	7.17347e-14	159.61	99.3899
	noncanon	1615	4	HUERSP2	8204	253	3160754733	59205289	0.0187314	3.12915e-14	153.672	99.3278
	noncanon	4017	13	HERVH	7086	232	3160754733	59205289	0.0187314	9.20916e-16	132.731	99.2695
	noncanon	1275	3	HERVH	7680	243	3160754733	59205289	0.0187314	7.28828e-15	143.857	99.143
	noncanon	3861	12	HERVH	8495	258	3160754733	59205289	0.0187314	8.64834e-14	159.123	98.877
	canon	1036	3	HERVH	6947	229	3160754733	59205289	0.0187314	6.96566e-16	130.127	98.8731
	noncanon	1149	3	HERVH	6750	225	3160754733	59205289	0.0187314	3.96153e-16	126.437	98.5632
	canon	3355	10	HERV9	7875	246	3160754733	59205289	0.0187314	1.87079e-14	147.51	98.4904
	noncanon	3724	12	HERVH	10013	286	3160754733	59205289	0.0187314	3.25646e-12	187.557	98.4427
	noncanon	4683	19	HML8	9857	283	3160754733	59205289	0.0187314	2.47732e-12	184.635	98.3648
	noncanon	1622	4	HERVH	9278	272	3160754733	59205289	0.0187314	7.85346e-13	173.79	98.2103
	noncanon	3561	11	MER41	6679	223	3160754733	59205289	0.0187314	4.47738e-16	125.107	97.8931
	canon	2930	8	HERVH	5405	199	3160754733	59205289	0.0187314	1.30918e-18	101.243	97.7569
	noncanon	1273	3	HERVW	6262	215	3160754733	59205289	0.0187314	9.05406e-17	117.296	97.7041
	noncanon	4674	19	HERVH	6647	222	3160754733	59205289	0.0187314	5.01661e-16	124.507	97.4925
	canon	4379	16	HERVH	9052	267	3160754733	59205289	0.0187314	6.73975e-13	169.556	97.4436
	noncanon	1013	3	HARLEQUIN	7615	240	3160754733	59205289	0.0187314	1.55205e-14	142.639	97.3606
	noncanon	2852	8	HERVH	6551	220	3160754733	59205289	0.0187314	3.87646e-16	122.709	97.2907
	noncanon	1025	3	HML7	6883	226	3160754733	59205289	0.0187314	1.56443e-15	128.928	97.0719
	canon	1336	4	HERVH	6208	213	3160754733	59205289	0.0187314	1.32795e-16	116.284	96.7156
	canon	3557	11	HML5	7491	237	3160754733	59205289	0.0187314	1.51916e-14	140.317	96.6833
	canon	5811	1	HERVH	8042	247	3160754733	59205289	0.0187314	9.07242e-14	150.638	96.3623
	noncanon	1759	5	HERV9	3934	170	3160754733	59205289	0.0187314	1.19813e-22	73.6892	96.3108
	canon	3965	13	MER52	4367	178	3160754733	59205289	0.0187314	4.85784e-21	81.7999	96.2001
	canon	591	2	HERVH	4112	173	3160754733	59205289	0.0187314	7.53657e-22	77.0234	95.9766
	canon	3846	12	HERVIP	8438	254	3160754733	59205289	0.0187314	3.16694e-13	158.055	95.9446
	canon	2937	8	HERVH	4920	188	3160754733	59205289	0.0187314	2.9549e-19	92.1584	95.8416
	noncanon	475	2	HARLEQUIN	7284	232	3160754733	59205289	0.0187314	1.44747e-14	136.439	95.5606
	canon	6135	1	HERVL	6810	223	3160754733	59205289	0.0187314	3.07649e-15	127.561	95.4393
	canon	1989	5	HERV9	8695	258	3160754733	59205289	0.0187314	8.74375e-13	162.869	95.1307
	canon	1362	4	HERVL	6576	218	3160754733	59205289	0.0187314	1.85353e-15	123.178	94.8225
	noncanon	1008	3	HERV30	5834	204	3160754733	59205289	0.0187314	8.81285e-17	109.279	94.7211
	noncanon	3632	11	HERVIP	7975	244	3160754733	59205289	0.0187314	1.82949e-13	149.383	94.6173
	noncanon	461	2	HERVH	7125	228	3160754733	59205289	0.0187314	1.51159e-14	133.461	94.5389
	noncanon	806	2	HERVL	5902	205	3160754733	59205289	0.0187314	1.43322e-16	110.553	94.4474
	noncanon	2793	8	HML3	7031	226	3160754733	59205289	0.0187314	1.26349e-14	131.7	94.2997
	noncanon	2160	6	HML8	5865	204	3160754733	59205289	0.0187314	1.4737e-16	109.86	94.1405
	noncanon	1672	4	HERVL	14523	366	3160754733	59205289	0.0187314	6.87029e-09	272.036	93.9642
	canon	4319	15	HERVH	6945	224	3160754733	59205289	0.0187314	1.17469e-14	130.089	93.9106
	noncanon	1437	4	HERVL	7960	243	3160754733	59205289	0.0187314	2.52386e-13	149.102	93.8982
	noncanon	1757	5	HERVH	4655	181	3160754733	59205289	0.0187314	2.43903e-19	87.1946	93.8054
	noncanon	3733	12	HERVE	10050	282	3160754733	59205289	0.0187314	2.55796e-11	188.25	93.7497
	noncanon	2177	6	HERVW	7275	230	3160754733	59205289	0.0187314	3.79985e-14	136.271	93.7292
	canon	2166	6	HERVH	5676	200	3160754733	59205289	0.0187314	8.22896e-17	106.319	93.6807
	canon	1577	4	HERVH	5682	200	3160754733	59205289	0.0187314	9.10935e-17	106.432	93.5683
	noncanon	4561	18	HERVH48	13370	344	3160754733	59205289	0.0187314	2.53087e-09	250.439	93.5615
	noncanon	914	3	HERV9	5581	198	3160754733	59205289	0.0187314	6.01484e-17	104.54	93.4602
	noncanon	4219	14	HERVH	12842	334	3160754733	59205289	0.0187314	1.47774e-09	240.548	93.4517
	noncanon	2313	6	HERVH	7202	228	3160754733	59205289	0.0187314	4.25299e-14	134.903	93.0966
	canon	1600	4	HERV9	4751	182	3160754733	59205289	0.0187314	8.23436e-19	88.9928	93.0072
	noncanon	1610	4	HERVIP	6144	208	3160754733	59205289	0.0187314	1.05688e-15	115.086	92.9144
	noncanon	2690	8	HML5	4921	185	3160754733	59205289	0.0187314	2.66965e-18	92.1771	92.8229
	canon	6145	1	HERV9	3537	159	3160754733	59205289	0.0187314	6.25034e-23	66.2529	92.7471
	noncanon	4126	14	LTR25	7648	236	3160754733	59205289	0.0187314	1.92862e-13	143.258	92.7424
	noncanon	2296	6	HERVH	12252	322	3160754733	59205289	0.0187314	1.0276e-09	229.497	92.5032
	canon	2788	8	HML8	6019	205	3160754733	59205289	0.0187314	9.41376e-16	112.744	92.2558
	noncanon	1359	4	MER83	5862	202	3160754733	59205289	0.0187314	4.97643e-16	109.803	92.1967
	canon	3969	13	HERVH	5872	202	3160754733	59205289	0.0187314	5.84717e-16	109.991	92.0094
	noncanon	6042	1	HML3	2831	145	3160754733	59205289	0.0187314	2.8907e-26	53.0285	91.9715
	noncanon	3387	11	HERVIP	10307	285	3160754733	59205289	0.0187314	8.2961e-11	193.064	91.9357
	noncanon	4015	13	HERVL	5084	187	3160754733	59205289	0.0187314	1.43136e-17	95.2303	91.7697
	noncanon	4657	19	HML5	11171	301	3160754733	59205289	0.0187314	3.29743e-10	209.248	91.7518
	noncanon	3439	11	THE	6153	207	3160754733	59205289	0.0187314	2.22678e-15	115.254	91.7458
	canon	2898	8	HERVL	6849	220	3160754733	59205289	0.0187314	2.90123e-14	128.291	91.7088
	canon	4644	19	HERVH48	6592	215	3160754733	59205289	0.0187314	1.33027e-14	123.477	91.5228
	canon	5937	1	HERVH	8728	255	3160754733	59205289	0.0187314	5.07019e-12	163.487	91.5125
	canon	2213	6	HERVH	8195	245	3160754733	59205289	0.0187314	1.49829e-12	153.504	91.4964
	canon	4201	14	HERVH	5475	194	3160754733	59205289	0.0187314	1.35084e-16	102.554	91.4457
	canon	4551	18	HERVIP	6975	222	3160754733	59205289	0.0187314	5.34326e-14	130.651	91.3486
	noncanon	3256	10	HERVH	14665	366	3160754733	59205289	0.0187314	1.72642e-08	274.696	91.3044
	canon	2314	6	HERVH	6075	205	3160754733	59205289	0.0187314	2.25223e-15	113.793	91.2069
	canon	1203	3	HERVH	4430	174	3160754733	59205289	0.0187314	4.44281e-19	82.98	91.02
	canon	1925	5	HERVH	6847	219	3160754733	59205289	0.0187314	4.90799e-14	128.254	90.7463
	canon	4118	14	HERVL	6261	208	3160754733	59205289	0.0187314	6.2566e-15	117.277	90.7228
	noncanon	3907	12	HERVFA	14270	358	3160754733	59205289	0.0187314	1.46913e-08	267.297	90.7032
	canon	3622	11	HERV9	10220	282	3160754733	59205289	0.0187314	1.24503e-10	191.435	90.5653
	noncanon	3258	10	HERV9	5905	201	3160754733	59205289	0.0187314	1.83892e-15	110.609	90.3912
	canon	1624	4	HERVH	6119	205	3160754733	59205289	0.0187314	4.41349e-15	114.617	90.3827
	canon	702	2	HERV9	7687	234	3160754733	59205289	0.0187314	8.55594e-13	143.988	90.0119
	noncanon	3027	9	HERVL	6728	216	3160754733	59205289	0.0187314	5.07345e-14	126.025	89.9753
	noncanon	4780	19	MST	17037	409	3160754733	59205289	0.0187314	1.42127e-07	319.126	89.8735
	canon	918	3	MER52	4496	174	3160754733	59205289	0.0187314	1.75965e-18	84.2163	89.7837
	canon	1237	3	HERVH	6328	208	3160754733	59205289	0.0187314	1.67429e-14	118.532	89.4678
	canon	3621	11	HML8	9638	270	3160754733	59205289	0.0187314	7.31125e-11	180.533	89.467
	canon	848	3	HERVL	6285	207	3160754733	59205289	0.0187314	1.60033e-14	117.727	89.2733
	noncanon	2188	6	HERVH	5598	194	3160754733	59205289	0.0187314	1.06118e-15	104.858	89.1418
	noncanon	1680	4	HUERSP3	8268	244	3160754733	59205289	0.0187314	5.4701e-12	154.871	89.129
	noncanon	597	2	HERVFC	5561	193	3160754733	59205289	0.0187314	1.09202e-15	104.165	88.8348
	canon	3903	12	HERVH	7645	232	3160754733	59205289	0.0187314	1.4023e-12	143.201	88.7986
	noncanon	1206	3	HERV9	6206	205	3160754733	59205289	0.0187314	1.61632e-14	116.247	88.7531
	noncanon	2794	8	HML2	7864	236	3160754733	59205289	0.0187314	2.57128e-12	147.304	88.6965
	noncanon	4680	19	HML5	7279	225	3160754733	59205289	0.0187314	5.58301e-13	136.346	88.6543
	noncanon	4028	13	ERV1_ARTIODACT	6863	217	3160754733	59205289	0.0187314	1.80881e-13	128.553	88.4466
	canon	3676	11	HERVL	6495	210	3160754733	59205289	0.0187314	5.75832e-14	121.66	88.3397
	canon	3442	11	HERVIP	5813	197	3160754733	59205289	0.0187314	5.0672e-15	108.885	88.1145
	noncanon	3035	9	HARLEQUIN	7309	225	3160754733	59205289	0.0187314	8.10422e-13	136.908	88.0924
	noncanon	1692	4	HERVH	7205	223	3160754733	59205289	0.0187314	6.2126e-13	134.96	88.0404
	canon	3231	10	HERVFA	9398	264	3160754733	59205289	0.0187314	8.94013e-11	176.037	87.9625
	canon	1370	4	HERVL	6731	214	3160754733	59205289	0.0187314	1.58661e-13	126.081	87.9191
	canon	1247	3	HUERSP3	9730	270	3160754733	59205289	0.0187314	1.73078e-10	182.256	87.7437
	noncanon	2194	6	HERV9	5837	197	3160754733	59205289	0.0187314	7.34939e-15	109.335	87.665
	canon	1968	5	HERVH	7387	226	3160754733	59205289	0.0187314	1.26852e-12	138.369	87.6313
	noncanon	2683	8	HERVH	7661	231	3160754733	59205289	0.0187314	2.77369e-12	143.501	87.4989
	canon	4687	19	HML8	4639	174	3160754733	59205289	0.0187314	3.04191e-17	86.8949	87.1051
	canon	2199	6	HERVH	6134	202	3160754733	59205289	0.0187314	3.23924e-14	114.898	87.1017
	canon	5921	1	HERVADP	8707	250	3160754733	59205289	0.0187314	3.82672e-11	163.094	86.9059
	noncanon	2266	6	HERVH	10416	282	3160754733	59205289	0.0187314	6.9888e-10	195.106	86.894
	noncanon	852	3	HERVH	12179	315	3160754733	59205289	0.0187314	6.40587e-09	228.129	86.8706
	noncanon	805	2	HERVH	6432	207	3160754733	59205289	0.0187314	1.28791e-13	120.48	86.5198
	canon	3305	10	HERVH	5857	196	3160754733	59205289	0.0187314	1.82166e-14	109.71	86.2903
	canon	4116	14	HERVL	6353	205	3160754733	59205289	0.0187314	1.31891e-13	119	85.9996
	canon	2212	6	HERVL	6006	198	3160754733	59205289	0.0187314	5.12747e-14	112.501	85.4993
	noncanon	1216	3	HERV9	5267	184	3160754733	59205289	0.0187314	2.66569e-15	98.6582	85.3418
	canon	3253	10	HERVT	9541	264	3160754733	59205289	0.0187314	3.41152e-10	178.716	85.2839
	noncanon	980	3	HARLEQUIN	6042	198	3160754733	59205289	0.0187314	8.64464e-14	113.175	84.825
	canon	1413	4	HERV9	3535	151	3160754733	59205289	0.0187314	6.72568e-20	66.2154	84.7846
	canon	999	3	MER52	11331	297	3160754733	59205289	0.0187314	5.0149e-09	212.245	84.7548
	canon	2627	7	HERVH	8720	248	3160754733	59205289	0.0187314	1.04009e-10	163.338	84.6624
	noncanon	4062	14	HERVIP	10646	284	3160754733	59205289	0.0187314	2.26122e-09	199.414	84.5858
	canon	1766	5	HERVH	8303	240	3160754733	59205289	0.0187314	4.95383e-11	155.527	84.4734
	canon	1154	3	HERVH	5611	189	3160754733	59205289	0.0187314	2.88701e-14	105.102	83.8982
	canon	1425	4	HERV9	9352	259	3160754733	59205289	0.0187314	4.49776e-10	175.176	83.8242
	noncanon	2890	8	HML5	3435	148	3160754733	59205289	0.0187314	7.26569e-20	64.3423	83.6577
	noncanon	1579	4	MER57	7453	223	3160754733	59205289	0.0187314	1.21566e-11	139.605	83.395
	noncanon	4243	15	PRIMA41	4042	159	3160754733	59205289	0.0187314	1.15586e-17	75.7122	83.2878
	noncanon	1770	5	HERV9	4058	159	3160754733	59205289	0.0187314	1.62098e-17	76.0119	82.9881
	noncanon	3675	11	HERVH	10534	280	3160754733	59205289	0.0187314	3.88605e-09	197.316	82.6837
	canon	1818	5	HML8	9256	256	3160754733	59205289	0.0187314	6.22682e-10	173.378	82.6224
	noncanon	693	2	HERVH	4943	175	3160754733	59205289	0.0187314	3.87417e-15	92.5892	82.4108
	canon	2498	7	HML3	3609	150	3160754733	59205289	0.0187314	9.27383e-19	67.6015	82.3985
	noncanon	2006	5	HERVL	10351	276	3160754733	59205289	0.0187314	3.76434e-09	193.888	82.1115
	canon	653	2	HERVL	4752	171	3160754733	59205289	0.0187314	1.98325e-15	89.0115	81.9885
	noncanon	2170	6	HERV9	14526	354	3160754733	59205289	0.0187314	2.20638e-07	272.092	81.908
	canon	1220	3	HERVH	6906	211	3160754733	59205289	0.0187314	7.12188e-12	129.359	81.6411
	noncanon	1352	4	HERV9	7077	214	3160754733	59205289	0.0187314	1.23366e-11	132.562	81.438
	canon	2267	6	HERVL	6770	208	3160754733	59205289	0.0187314	6.18951e-12	126.811	81.1886
	canon	4091	14	HERVL	4908	173	3160754733	59205289	0.0187314	7.89309e-15	91.9336	81.0664
	canon	1426	4	HERV9	8275	236	3160754733	59205289	0.0187314	2.15744e-10	155.002	80.9979
	canon	1576	4	HERV3	5770	189	3160754733	59205289	0.0187314	3.06969e-13	108.08	80.92
	noncanon	1387	4	HARLEQUIN	8388	238	3160754733	59205289	0.0187314	2.81066e-10	157.119	80.8812
	noncanon	3026	9	HERVH	6741	207	3160754733	59205289	0.0187314	7.21208e-12	126.268	80.7318
	canon	721	2	HERVH	7228	216	3160754733	59205289	0.0187314	2.68954e-11	135.39	80.6096
	canon	1864	5	HUERSP2	8084	232	3160754733	59205289	0.0187314	1.78559e-10	151.424	80.5755
	noncanon	3559	11	HERVH	5902	191	3160754733	59205289	0.0187314	6.39317e-13	110.553	80.4474
	noncanon	2800	8	HML3	5959	192	3160754733	59205289	0.0187314	8.06219e-13	111.62	80.3797
	noncanon	1716	4	HML3	7457	220	3160754733	59205289	0.0187314	5.28357e-11	139.68	80.3201
	canon	1226	3	HERVH	5131	176	3160754733	59205289	0.0187314	4.59069e-14	96.1107	79.8893
	canon	2970	8	HERVH48	3799	151	3160754733	59205289	0.0187314	3.03687e-17	71.1605	79.8395
	canon	4550	18	HERVL	6579	203	3160754733	59205289	0.0187314	7.53963e-12	123.234	79.7663
	canon	3723	12	HERVE	7862	227	3160754733	59205289	0.0187314	1.65572e-10	147.266	79.7339
	canon	3853	12	HERV9	9041	249	3160754733	59205289	0.0187314	1.44043e-09	169.35	79.6496
	canon	1422	4	HERVL	6747	206	3160754733	59205289	0.0187314	1.28695e-11	126.381	79.6194
	noncanon	3886	12	HERVH	8617	241	3160754733	59205289	0.0187314	7.29408e-10	161.408	79.5917
	noncanon	2670	7	HERVH	9319	254	3160754733	59205289	0.0187314	2.39965e-09	174.558	79.4423
	noncanon	1723	4	HERVH	10870	283	3160754733	59205289	0.0187314	1.84171e-08	203.61	79.3899
	canon	3906	12	HERVL	7207	214	3160754733	59205289	0.0187314	5.50942e-11	134.997	79.003
	noncanon	1543	4	HERVH	11211	289	3160754733	59205289	0.0187314	3.04273e-08	209.997	79.0025
	noncanon	1245	3	HERVH	8864	245	3160754733	59205289	0.0187314	1.42362e-09	166.035	78.9651
	canon	580	2	HERVH	6094	193	3160754733	59205289	0.0187314	2.89916e-12	114.149	78.851
	noncanon	4278	15	HML5	5785	187	3160754733	59205289	0.0187314	1.18477e-12	108.361	78.639
	noncanon	1662	4	HERVH	6114	193	3160754733	59205289	0.0187314	3.7764e-12	114.524	78.4764
	canon	472	2	HERVH	5966	190	3160754733	59205289	0.0187314	2.67952e-12	111.751	78.2486
	canon	1197	3	HUERSP2	4160	156	3160754733	59205289	0.0187314	1.16589e-15	77.9225	78.0775
	canon	2646	7	HERVH	5291	177	3160754733	59205289	0.0187314	2.99927e-13	99.1077	77.8923
	noncanon	1196	3	HERV9	4285	158	3160754733	59205289	0.0187314	3.03567e-15	80.264	77.736
	noncanon	1510	4	HERVH	7187	212	3160754733	59205289	0.0187314	1.13079e-10	134.622	77.3776
	noncanon	3351	10	MER66	14345	346	3160754733	59205289	0.0187314	6.63243e-07	268.702	77.2984
	noncanon	1619	4	HML5	4319	158	3160754733	59205289	0.0187314	5.69513e-15	80.9008	77.0992
	noncanon	2443	7	HERV9	7369	215	3160754733	59205289	0.0187314	2.0439e-10	138.032	76.9685
	noncanon	3730	12	HERVH	16552	387	3160754733	59205289	0.0187314	2.45924e-06	310.042	76.9582
	noncanon	1693	4	HERVH	7744	222	3160754733	59205289	0.0187314	4.47714e-10	145.056	76.9442
	noncanon	1500	4	HML3	11753	297	3160754733	59205289	0.0187314	1.02995e-07	220.15	76.8501
	canon	4645	19	HERVH	6098	191	3160754733	59205289	0.0187314	8.91132e-12	114.224	76.7761
	noncanon	991	3	HERVH	8611	238	3160754733	59205289	0.0187314	2.33398e-09	161.296	76.7041
	noncanon	6013	1	HERVL	9165	248	3160754733	59205289	0.0187314	6.29385e-09	171.673	76.3269
	canon	4572	18	ERV1_ARTIODACT	8805	241	3160754733	59205289	0.0187314	4.07157e-09	164.93	76.0702
	canon	2547	7	HERVIP	8434	234	3160754733	59205289	0.0187314	2.29986e-09	157.98	76.0196
	canon	3609	11	LTR46	8597	237	3160754733	59205289	0.0187314	3.06274e-09	161.034	75.9664
	noncanon	1385	4	HML1	4015	151	3160754733	59205289	0.0187314	2.55014e-15	75.2065	75.7935
	noncanon	3389	11	HERVH	7863	223	3160754733	59205289	0.0187314	9.5698e-10	147.285	75.7152
	canon	6122	1	HML8	9145	247	3160754733	59205289	0.0187314	7.74481e-09	171.298	75.7016
	noncanon	2899	8	HERVH	10010	263	3160754733	59205289	0.0187314	2.57416e-08	187.501	75.4989
	canon	1928	5	HERVFA	7504	216	3160754733	59205289	0.0187314	5.38037e-10	140.56	75.4397
	canon	1329	4	HERVH	6226	192	3160754733	59205289	0.0187314	2.67439e-11	116.622	75.3784
	noncanon	1605	4	HERVH	7779	221	3160754733	59205289	0.0187314	9.81347e-10	145.711	75.2886
	noncanon	1210	3	HML5	4042	151	3160754733	59205289	0.0187314	4.29294e-15	75.7122	75.2878
	canon	767	2	HERVL	5492	178	3160754733	59205289	0.0187314	3.13479e-12	102.873	75.1273
	noncanon	4663	19	HML4	9773	258	3160754733	59205289	0.0187314	2.3488e-08	183.062	74.9383
	noncanon	1842	5	HERV9	7858	222	3160754733	59205289	0.0187314	1.39357e-09	147.191	74.8088
	noncanon	4526	18	HERVIP	6097	189	3160754733	59205289	0.0187314	2.51044e-11	114.205	74.7948
	noncanon	3443	11	HERVW	10756	276	3160754733	59205289	0.0187314	8.15292e-08	201.475	74.5253
	canon	3677	11	HERVH	6012	187	3160754733	59205289	0.0187314	2.43035e-11	112.613	74.387
	canon	2781	8	HERVT	9912	260	3160754733	59205289	0.0187314	3.43138e-08	185.665	74.3346
	canon	1788	5	HERVH	3518	140	3160754733	59205289	0.0187314	3.58321e-16	65.897	74.103
	canon	3592	11	HERVL	6683	199	3160754733	59205289	0.0187314	1.88157e-10	125.182	73.8182
	noncanon	1269	3	PRIMA41	7225	209	3160754733	59205289	0.0187314	6.70663e-10	135.334	73.6658
	noncanon	4121	14	HERVH	6532	196	3160754733	59205289	0.0187314	1.41778e-10	122.353	73.6466
	canon	5986	1	HERVIP	6753	200	3160754733	59205289	0.0187314	2.57041e-10	126.493	73.507
	canon	849	3	HERVE	5259	172	3160754733	59205289	0.0187314	3.50976e-12	98.5083	73.4917
	canon	4245	15	HERVH	4090	150	3160754733	59205289	0.0187314	2.13842e-14	76.6113	73.3887
	canon	2645	7	HERVH	4572	159	3160754733	59205289	0.0187314	2.39326e-13	85.6399	73.3601
	noncanon	611	2	HERVH	8098	225	3160754733	59205289	0.0187314	3.93665e-09	151.687	73.3133
	noncanon	1012	3	HERVH	11419	287	3160754733	59205289	0.0187314	2.38747e-07	213.894	73.1064
	noncanon	2865	8	HERVL	4377	155	3160754733	59205289	0.0187314	1.20386e-13	81.9872	73.0128
	canon	4858	21	HERVIP	8494	232	3160754733	59205289	0.0187314	8.71717e-09	159.104	72.8957
	noncanon	2433	7	HERV9	7106	206	3160754733	59205289	0.0187314	7.40392e-10	133.105	72.8948
	noncanon	6152	1	ERV1_ARTIODACT	4971	166	3160754733	59205289	0.0187314	1.70906e-12	93.1137	72.8863
	canon	2137	6	HML9	6049	186	3160754733	59205289	0.0187314	6.46979e-11	113.306	72.6939
	canon	1613	4	HERVH	5355	173	3160754733	59205289	0.0187314	7.72272e-12	100.307	72.6935
	noncanon	4868	21	HERVH	8348	229	3160754733	59205289	0.0187314	7.72944e-09	156.37	72.6305
	canon	4639	19	HERVT	9633	253	3160754733	59205289	0.0187314	4.55755e-08	180.439	72.5606
	canon	6234	1	HERVH	6006	185	3160754733	59205289	0.0187314	6.34509e-11	112.501	72.4993
	noncanon	2419	7	HERVW	8796	237	3160754733	59205289	0.0187314	1.73714e-08	164.761	72.2388
	canon	2773	8	HERVIP	6400	192	3160754733	59205289	0.0187314	2.14892e-10	119.881	72.1192
	noncanon	5925	1	HERVH	3148	131	3160754733	59205289	0.0187314	1.13253e-16	58.9664	72.0336
	noncanon	2472	7	HML3	10360	266	3160754733	59205289	0.0187314	1.25402e-07	194.057	71.9429
	noncanon	800	2	HERVH	11701	291	3160754733	59205289	0.0187314	4.43801e-07	219.176	71.8242
	noncanon	4633	19	HERVFB	12885	313	3160754733	59205289	0.0187314	1.12448e-06	241.354	71.6462
	noncanon	4641	19	HERVE	8351	228	3160754733	59205289	0.0187314	1.17241e-08	156.426	71.5743
	noncanon	6279	22	MER66	6057	185	3160754733	59205289	0.0187314	1.18458e-10	113.456	71.544
	noncanon	3684	12	HERVADP	19517	437	3160754733	59205289	0.0187314	2.38708e-05	365.58	71.4197
	canon	1152	3	HERVH	5551	175	3160754733	59205289	0.0187314	3.64499e-11	103.978	71.0221
	noncanon	2847	8	HERVIP	12925	313	3160754733	59205289	0.0187314	1.40924e-06	242.103	70.897
	canon	3972	13	HERVH	5888	181	3160754733	59205289	0.0187314	1.14352e-10	110.29	70.7097
	noncanon	2043	5	HERVH	7437	210	3160754733	59205289	0.0187314	3.68226e-09	139.305	70.6947
	canon	2691	8	HML5	5518	174	3160754733	59205289	0.0187314	4.04241e-11	103.36	70.6403
	noncanon	997	3	HERVH	3439	135	3160754733	59205289	0.0187314	3.12787e-15	64.4172	70.5828
	noncanon	4679	19	HML3	8250	225	3160754733	59205289	0.0187314	1.54666e-08	154.534	70.4661
	canon	3905	12	HERVIP	8413	228	3160754733	59205289	0.0187314	2.0066e-08	157.587	70.4129
	noncanon	3987	13	HERVH	9237	243	3160754733	59205289	0.0187314	6.97327e-08	173.022	69.9783
	canon	1211	3	HERVT	7531	211	3160754733	59205289	0.0187314	5.98508e-09	141.066	69.934
	canon	1594	4	HERVH	6468	191	3160754733	59205289	0.0187314	7.4679e-10	121.155	69.8455
	noncanon	2297	6	HERV9	6471	191	3160754733	59205289	0.0187314	7.71976e-10	121.211	69.7893
	noncanon	4734	19	THE	15120	353	3160754733	59205289	0.0187314	6.32182e-06	283.218	69.7816
	noncanon	517	2	HERV9	7008	201	3160754733	59205289	0.0187314	2.47447e-09	131.269	69.7305
	noncanon	1785	5	HML6	4720	158	3160754733	59205289	0.0187314	4.60507e-12	88.4121	69.5879
	canon	971	3	HERVH	6322	188	3160754733	59205289	0.0187314	6.0322e-10	118.42	69.5802
	canon	1024	3	MER65	8778	234	3160754733	59205289	0.0187314	4.5235e-08	164.424	69.576
	canon	1032	3	HERVW	2372	114	3160754733	59205289	0.0187314	4.88782e-19	44.4308	69.5692
	noncanon	637	2	HERVL	6699	195	3160754733	59205289	0.0187314	1.44445e-09	125.481	69.5185
	canon	1056	3	HERVH	5635	175	3160754733	59205289	0.0187314	1.07519e-10	105.551	69.4487
	noncanon	4636	19	HML2	9805	253	3160754733	59205289	0.0187314	1.64618e-07	183.661	69.3388
	noncanon	540	2	HML3	5331	169	3160754733	59205289	0.0187314	5.06928e-11	99.857	69.143
	canon	3857	12	HML8	4700	157	3160754733	59205289	0.0187314	6.18969e-12	88.0375	68.9625
	canon	1227	3	HEPSI1	8926	236	3160754733	59205289	0.0187314	7.20724e-08	167.196	68.8037
	noncanon	2624	7	HERV9	3171	128	3160754733	59205289	0.0187314	2.17808e-15	59.3972	68.6028
	canon	4527	18	HML5	3928	142	3160754733	59205289	0.0187314	2.72444e-13	73.5768	68.4232
	canon	1841	5	HERV9	7828	215	3160754733	59205289	0.0187314	1.83749e-08	146.629	68.3708
	canon	2151	6	HERVH	3452	133	3160754733	59205289	0.0187314	1.85401e-14	64.6607	68.3393
	noncanon	777	2	HERVH	12048	294	3160754733	59205289	0.0187314	1.54647e-06	225.676	68.3244
	noncanon	2878	8	LTR38	6710	194	3160754733	59205289	0.0187314	2.5447e-09	125.688	68.3125
	noncanon	1268	3	HERVH	8214	222	3160754733	59205289	0.0187314	3.5675e-08	153.86	68.1405
	noncanon	1186	3	HERVH	7372	206	3160754733	59205289	0.0187314	1.04784e-08	138.088	67.9123
	canon	5940	1	HERVH	5720	175	3160754733	59205289	0.0187314	3.08412e-10	107.143	67.8565
	noncanon	483	2	HERVH	9886	253	3160754733	59205289	0.0187314	2.93116e-07	185.178	67.8216
	noncanon	2976	8	HML2	11453	282	3160754733	59205289	0.0187314	1.27124e-06	214.53	67.4695
	canon	4039	13	HERVH	4622	154	3160754733	59205289	0.0187314	1.1444e-11	86.5764	67.4236
	noncanon	4094	14	HERVL	4100	144	3160754733	59205289	0.0187314	1.43225e-12	76.7986	67.2014
	noncanon	1386	4	HERVL	6297	185	3160754733	59205289	0.0187314	1.87157e-09	117.951	67.0485
	canon	2872	8	HERVH	5927	178	3160754733	59205289	0.0187314	8.12649e-10	111.021	66.9791
	noncanon	2201	6	HERVL	7371	205	3160754733	59205289	0.0187314	1.56318e-08	138.069	66.931
	canon	4400	16	MER52	2842	120	3160754733	59205289	0.0187314	7.20857e-16	53.2346	66.7654
	noncanon	1429	4	HML8	3221	127	3160754733	59205289	0.0187314	1.41523e-14	60.3338	66.6662
	noncanon	1663	4	HERVH	7621	209	3160754733	59205289	0.0187314	3.06971e-08	142.752	66.2482
	canon	1702	4	HERVH	4847	157	3160754733	59205289	0.0187314	5.24179e-11	90.791	66.209
	canon	6259	1	HERVH	5222	164	3160754733	59205289	0.0187314	1.77714e-10	97.8153	66.1847
	noncanon	1710	4	HERV9	8213	220	3160754733	59205289	0.0187314	7.45577e-08	153.841	66.1592
	noncanon	3624	11	HERVE	8003	216	3160754733	59205289	0.0187314	5.72424e-08	149.907	66.0928
	canon	4866	21	HERVH	6032	179	3160754733	59205289	0.0187314	1.66347e-09	112.988	66.0123
	canon	3663	11	HERVH	5555	170	3160754733	59205289	0.0187314	5.19514e-10	104.053	65.9472
	canon	889	3	HERVH	5718	173	3160754733	59205289	0.0187314	8.18206e-10	107.106	65.894
	canon	1922	5	HERVH	5133	162	3160754733	59205289	0.0187314	1.61889e-10	96.1482	65.8518
	canon	1414	4	HERVH	3587	133	3160754733	59205289	0.0187314	2.61804e-13	67.1894	65.8106
	noncanon	1575	4	HARLEQUIN	5851	175	3160754733	59205289	0.0187314	1.44785e-09	109.597	65.4027
	canon	3420	11	HERV9	8148	218	3160754733	59205289	0.0187314	9.111e-08	152.623	65.3767
	canon	1523	4	HML3	5698	172	3160754733	59205289	0.0187314	1.05841e-09	106.731	65.2686
	noncanon	4856	21	HML3	4335	146	3160754733	59205289	0.0187314	1.78898e-11	81.2005	64.7995
	canon	1155	3	HERVH	4502	149	3160754733	59205289	0.0187314	3.68762e-11	84.3287	64.6713
	noncanon	5718	X	HERVH	9365	240	3160754733	59205289	0.0187314	4.92525e-07	175.419	64.5807
	noncanon	3850	12	HERVH	6379	184	3160754733	59205289	0.0187314	7.04776e-09	119.487	64.5125
	canon	585	2	HERVH	5907	175	3160754733	59205289	0.0187314	2.72728e-09	110.646	64.3538
	noncanon	2324	6	HERVH	5813	173	3160754733	59205289	0.0187314	2.45232e-09	108.885	64.1145
	noncanon	1590	4	HERVH	6734	190	3160754733	59205289	0.0187314	1.84228e-08	126.137	63.8629
	noncanon	3489	11	HERV3	3666	132	3160754733	59205289	0.0187314	2.2173e-12	68.6692	63.3308
	canon	3466	11	HERVH	6675	188	3160754733	59205289	0.0187314	2.41501e-08	125.032	62.9681
	canon	2565	7	HERVH	5618	168	3160754733	59205289	0.0187314	2.93598e-09	105.233	62.7671
	canon	4864	21	HERVH	5751	170	3160754733	59205289	0.0187314	5.07187e-09	107.724	62.2758
	noncanon	4735	19	HERVIP	8959	230	3160754733	59205289	0.0187314	7.07906e-07	167.814	62.1856
	noncanon	6155	1	HERVH	7475	202	3160754733	59205289	0.0187314	1.27752e-07	140.017	61.983
	noncanon	1435	4	HUERSP3	7529	203	3160754733	59205289	0.0187314	1.38425e-07	141.029	61.9715
	noncanon	1696	4	MST	9457	239	3160754733	59205289	0.0187314	1.27004e-06	177.143	61.8574
	canon	3913	12	HERVIP	5509	165	3160754733	59205289	0.0187314	3.58015e-09	103.191	61.8088
	noncanon	4306	15	HERVH	11018	268	3160754733	59205289	0.0187314	4.65558e-06	206.382	61.6177
	canon	3722	12	HERVH	5470	164	3160754733	59205289	0.0187314	3.70893e-09	102.461	61.5394
	noncanon	3963	13	HERVH	12764	300	3160754733	59205289	0.0187314	1.54023e-05	239.087	60.9127
	noncanon	1718	4	PRIMA41	7586	203	3160754733	59205289	0.0187314	2.22386e-07	142.096	60.9038
	canon	1239	3	HERVH48	5833	170	3160754733	59205289	0.0187314	1.23764e-08	109.26	60.7399
	canon	534	2	HERVH	4571	146	3160754733	59205289	0.0187314	5.39208e-10	85.6211	60.3789
	canon	2334	6	HERVH	6814	188	3160754733	59205289	0.0187314	8.87098e-08	127.636	60.3644
	canon	788	2	HERVH	6443	181	3160754733	59205289	0.0187314	4.8628e-08	120.686	60.3137
	noncanon	3386	11	HERVH	6125	175	3160754733	59205289	0.0187314	2.75721e-08	114.73	60.2703
	noncanon	2596	7	HERVL	13449	312	3160754733	59205289	0.0187314	2.56611e-05	251.918	60.0817
	canon	1950	5	HERV4	6140	175	3160754733	59205289	0.0187314	3.20535e-08	115.011	59.9893
	noncanon	982	3	HERVE	8389	217	3160754733	59205289	0.0187314	8.36306e-07	157.138	59.8625
	noncanon	4736	19	HERVH	8309	215	3160754733	59205289	0.0187314	9.06756e-07	155.639	59.361
	canon	3431	11	HERV3	8965	227	3160754733	59205289	0.0187314	1.91211e-06	167.927	59.0732
	noncanon	4370	16	HML2	4111	136	3160754733	59205289	0.0187314	2.39492e-10	77.0047	58.9953
	canon	1717	4	HERVH	6782	186	3160754733	59205289	0.0187314	1.46885e-07	127.036	58.9638
	noncanon	4012	13	HERVH	8654	221	3160754733	59205289	0.0187314	1.50233e-06	162.101	58.8987
	canon	2552	7	HUERSP3	7861	206	3160754733	59205289	0.0187314	6.74892e-07	147.247	58.7526
	canon	1909	5	HERV9	9259	232	3160754733	59205289	0.0187314	2.89842e-06	173.434	58.5662
	canon	3072	9	HERVH	6433	179	3160754733	59205289	0.0187314	1.00997e-07	120.499	58.5011
	canon	4189	14	HERVL	6446	179	3160754733	59205289	0.0187314	1.13947e-07	120.742	58.2575
	canon	2826	8	HERVS	6019	171	3160754733	59205289	0.0187314	5.38532e-08	112.744	58.2558
	canon	1926	5	HERVH	5604	163	3160754733	59205289	0.0187314	2.61138e-08	104.971	58.0294
	canon	1434	4	HML3	7050	190	3160754733	59205289	0.0187314	3.21553e-07	132.056	57.9438
	noncanon	2140	6	HML5	4813	148	3160754733	59205289	0.0187314	4.25709e-09	90.1541	57.8459
	noncanon	3610	11	HERVH	8828	223	3160754733	59205289	0.0187314	2.62735e-06	165.361	57.6394
	noncanon	2044	5	HERVH	10272	250	3160754733	59205289	0.0187314	8.28541e-06	192.409	57.5913
	noncanon	3611	11	HERV9	7230	193	3160754733	59205289	0.0187314	4.70373e-07	135.428	57.5721
	noncanon	5729	X	HERVE	8578	218	3160754733	59205289	0.0187314	2.29995e-06	160.678	57.3222
	noncanon	3203	10	HERVH	6924	187	3160754733	59205289	0.0187314	3.42932e-07	129.696	57.3039
	canon	1514	4	HERVH	6019	170	3160754733	59205289	0.0187314	8.24792e-08	112.744	57.2558
	canon	4837	20	HML3	6452	178	3160754733	59205289	0.0187314	1.80011e-07	120.855	57.1452
	noncanon	4123	14	HML3	4904	149	3160754733	59205289	0.0187314	7.74752e-09	91.8587	57.1413
	canon	860	3	HERVH	6990	188	3160754733	59205289	0.0187314	4.10661e-07	130.932	57.0677
	canon	4351	16	MER4	14792	334	3160754733	59205289	0.0187314	8.19802e-05	277.075	56.9255
	noncanon	1477	4	HERVH	12710	295	3160754733	59205289	0.0187314	3.71401e-05	238.076	56.9242
	canon	917	3	HERVH	5622	162	3160754733	59205289	0.0187314	4.93877e-08	105.308	56.6922
	canon	3979	13	HERVH	4343	138	3160754733	59205289	0.0187314	2.00629e-09	81.3504	56.6496
	noncanon	507	2	HERVH	9047	226	3160754733	59205289	0.0187314	4.43535e-06	169.463	56.5372
	noncanon	485	2	HERVW	8626	218	3160754733	59205289	0.0187314	3.18142e-06	161.577	56.4231
	noncanon	3731	12	HERVH	6244	173	3160754733	59205289	0.0187314	2.00547e-07	116.959	56.0413
	noncanon	2218	6	HERVH	5390	157	3160754733	59205289	0.0187314	4.10526e-08	100.962	56.0379
	canon	4192	14	HERVH	4818	146	3160754733	59205289	0.0187314	1.23861e-08	90.2478	55.7522
	noncanon	990	3	HUERSP3	3867	128	3160754733	59205289	0.0187314	7.22138e-10	72.4342	55.5658
	canon	4867	21	HERVH	5793	164	3160754733	59205289	0.0187314	1.15703e-07	108.511	55.4891
	canon	1246	3	HERVH	5745	163	3160754733	59205289	0.0187314	1.10573e-07	107.612	55.3882
	canon	1162	3	HERVH	5863	165	3160754733	59205289	0.0187314	1.49716e-07	109.822	55.1779
	noncanon	1463	4	HML3	13127	301	3160754733	59205289	0.0187314	6.5074e-05	245.887	55.1132
	canon	4659	19	HML3	6834	183	3160754733	59205289	0.0187314	7.18085e-07	128.01	54.9898
	noncanon	2977	8	HERVE	3471	120	3160754733	59205289	0.0187314	2.06549e-10	65.0166	54.9834
	canon	586	2	HERVH	5717	162	3160754733	59205289	0.0187314	1.28667e-07	107.087	54.9127
	noncanon	4652	19	HERV3	11117	263	3160754733	59205289	0.0187314	2.83007e-05	208.237	54.7633
	canon	1513	4	HERVH	6157	170	3160754733	59205289	0.0187314	3.0225e-07	115.329	54.6709
	noncanon	463	2	HERVL	6002	167	3160754733	59205289	0.0187314	2.44083e-07	112.426	54.5743
	noncanon	3328	10	HERVIP	7236	190	3160754733	59205289	0.0187314	1.43728e-06	135.54	54.4598
	noncanon	4021	13	HERVH	7610	197	3160754733	59205289	0.0187314	2.19322e-06	142.546	54.4542
	noncanon	5939	1	HERVH	7771	200	3160754733	59205289	0.0187314	2.61176e-06	145.562	54.4385
	noncanon	2094	6	HUERSP3	8467	213	3160754733	59205289	0.0187314	5.12499e-06	158.599	54.4014
	canon	584	2	HERVH	6235	171	3160754733	59205289	0.0187314	4.10009e-07	116.79	54.2099
	noncanon	3451	11	HERVH	5707	161	3160754733	59205289	0.0187314	1.78402e-07	106.9	54.1
	canon	981	3	HERVW	4108	131	3160754733	59205289	0.0187314	3.93455e-09	76.9485	54.0515
	noncanon	1035	3	HERVH	7474	194	3160754733	59205289	0.0187314	2.20242e-06	139.998	54.0017
	noncanon	2832	8	HML5	5767	162	3160754733	59205289	0.0187314	2.09055e-07	108.024	53.9761
	canon	4055	13	HERVH	6901	183	3160754733	59205289	0.0187314	1.2354e-06	129.265	53.7348
	noncanon	1747	5	HERVH	9732	236	3160754733	59205289	0.0187314	1.63365e-05	182.294	53.7062
	canon	2855	8	HERVH	5785	162	3160754733	59205289	0.0187314	2.48204e-07	108.361	53.639
	canon	4566	18	HERVH	5906	164	3160754733	59205289	0.0187314	3.39516e-07	110.628	53.3725
	canon	6029	1	HERV9	7464	193	3160754733	59205289	0.0187314	2.85864e-06	139.811	53.189
	noncanon	1951	5	HML7	9231	226	3160754733	59205289	0.0187314	1.37031e-05	172.909	53.0907
	canon	4334	16	HERVH	5603	158	3160754733	59205289	0.0187314	2.30785e-07	104.952	53.0481
	canon	3770	12	HERVIP	7369	191	3160754733	59205289	0.0187314	2.77869e-06	138.032	52.9685
	canon	1046	3	HERVS	6521	175	3160754733	59205289	0.0187314	1.03918e-06	122.147	52.8527
	noncanon	3319	10	HUERSP3	9938	239	3160754733	59205289	0.0187314	2.33064e-05	186.152	52.8476
	noncanon	3618	11	HML5	4074	129	3160754733	59205289	0.0187314	7.43471e-09	76.3116	52.6884
	noncanon	755	2	HERVW	8086	204	3160754733	59205289	0.0187314	6.45813e-06	151.462	52.5381
	noncanon	1509	4	HARLEQUIN	7782	198	3160754733	59205289	0.0187314	5.36591e-06	145.768	52.2324
	noncanon	3003	9	HML5	8322	208	3160754733	59205289	0.0187314	8.9917e-06	155.883	52.1175
	canon	6089	1	HML2	5655	158	3160754733	59205289	0.0187314	3.79386e-07	105.926	52.0741
	canon	1450	4	HML8	7321	189	3160754733	59205289	0.0187314	3.80768e-06	137.132	51.8676
	noncanon	668	2	HERVH48	3592	119	3160754733	59205289	0.0187314	2.48686e-09	67.2831	51.7169
	canon	5938	1	HERVH	5248	150	3160754733	59205289	0.0187314	2.13169e-07	98.3023	51.6977
	canon	4380	16	HERVT	4075	128	3160754733	59205289	0.0187314	1.28992e-08	76.3304	51.6696
	canon	2897	8	HERVH	6548	174	3160754733	59205289	0.0187314	1.8668e-06	122.653	51.3469
	noncanon	2969	8	HML3	1908	87	3160754733	59205289	0.0187314	9.57557e-14	35.7395	51.2605
	noncanon	3980	13	HERV9	3470	116	3160754733	59205289	0.0187314	2.38863e-09	64.9979	51.0021
	noncanon	1830	5	HERVH	9610	231	3160754733	59205289	0.0187314	3.07538e-05	180.009	50.9915
	noncanon	3946	13	HERVH	9612	231	3160754733	59205289	0.0187314	3.10889e-05	180.046	50.954
	noncanon	1182	3	HERVH	8550	211	3160754733	59205289	0.0187314	1.55914e-05	160.153	50.8467
	noncanon	5699	X	HERV9	7223	186	3160754733	59205289	0.0187314	5.04492e-06	135.297	50.7033
	canon	588	2	HERVH	6212	167	3160754733	59205289	0.0187314	1.55509e-06	116.359	50.6407
	noncanon	6191	1	HERVL	9843	235	3160754733	59205289	0.0187314	3.86979e-05	184.373	50.6271
	canon	1334	4	HERVH48	5521	154	3160754733	59205289	0.0187314	5.58259e-07	103.416	50.5841
	noncanon	4576	18	HERVW	3281	112	3160754733	59205289	0.0187314	1.47458e-09	61.4576	50.5424
	noncanon	2856	8	HERVH	8301	206	3160754733	59205289	0.0187314	1.41663e-05	155.489	50.5108
	canon	2837	8	HERVH	6967	181	3160754733	59205289	0.0187314	4.11332e-06	130.502	50.4985
	canon	2798	8	HML5	3878	123	3160754733	59205289	0.0187314	1.42808e-08	72.6403	50.3597
	canon	4562	18	ERV1_ARTIODACT	4626	137	3160754733	59205289	0.0187314	1.06596e-07	86.6514	50.3486
	noncanon	4035	13	HERVADP	7245	186	3160754733	59205289	0.0187314	5.90267e-06	135.709	50.2912
	noncanon	5881	1	HERVW	12874	291	3160754733	59205289	0.0187314	0.000171057	241.148	49.8523
	canon	5919	1	HERVH	5517	153	3160754733	59205289	0.0187314	8.08678e-07	103.341	49.659
	noncanon	1675	4	HUERSP3	5945	161	3160754733	59205289	0.0187314	1.56199e-06	111.358	49.642
	noncanon	2192	6	HERVL	8778	214	3160754733	59205289	0.0187314	2.61462e-05	164.424	49.576
	canon	2782	8	HML9	8302	205	3160754733	59205289	0.0187314	1.89985e-05	155.508	49.4921
	canon	460	2	HERVW	7770	195	3160754733	59205289	0.0187314	1.24981e-05	145.543	49.4572
	canon	5946	1	HERVH	6276	167	3160754733	59205289	0.0187314	2.6281e-06	117.558	49.4419
	canon	3151	9	HERVH	5752	157	3160754733	59205289	0.0187314	1.36767e-06	107.743	49.2571
	noncanon	4855	21	HML3	7302	186	3160754733	59205289	0.0187314	8.79406e-06	136.777	49.2235
	noncanon	1300	4	HERVE	5594	154	3160754733	59205289	0.0187314	1.09194e-06	104.783	49.2167
	canon	4783	19	HERVH	6302	167	3160754733	59205289	0.0187314	3.23592e-06	118.045	48.9549
	noncanon	4681	19	HML3	8975	217	3160754733	59205289	0.0187314	3.58103e-05	168.114	48.8859
	canon	1636	4	HERVW	4652	136	3160754733	59205289	0.0187314	2.25874e-07	87.1384	48.8616
	noncanon	639	2	HERVL	6483	170	3160754733	59205289	0.0187314	4.6161e-06	121.436	48.5645
	noncanon	1157	3	HERVT	4457	132	3160754733	59205289	0.0187314	1.72237e-07	83.4857	48.5143
	noncanon	3423	11	HERVH	2966	104	3160754733	59205289	0.0187314	1.39227e-09	55.5573	48.4427
	canon	2623	7	HERVH	4522	133	3160754733	59205289	0.0187314	2.20847e-07	84.7033	48.2967
	noncanon	1844	5	HML3	5697	155	3160754733	59205289	0.0187314	1.83506e-06	106.713	48.2873
	noncanon	3841	12	HERVE	8421	206	3160754733	59205289	0.0187314	2.92322e-05	157.737	48.2631
	canon	4579	18	HERVH	5440	150	3160754733	59205289	0.0187314	1.33668e-06	101.899	48.1013
	noncanon	5591	X	HERVH	7202	183	3160754733	59205289	0.0187314	1.14172e-05	134.903	48.0966
	noncanon	1398	4	MER66	7950	197	3160754733	59205289	0.0187314	2.16994e-05	148.914	48.0856
	canon	1212	3	HERVH	5672	154	3160754733	59205289	0.0187314	2.17064e-06	106.244	47.7556
	canon	2000	5	HERVH	5999	160	3160754733	59205289	0.0187314	3.55471e-06	112.37	47.6305
	noncanon	1184	3	HERV30	11504	263	3160754733	59205289	0.0187314	0.000169131	215.486	47.5142
	canon	3999	13	HERVS	5530	151	3160754733	59205289	0.0187314	2.01024e-06	103.585	47.4155
	canon	583	2	MER50	4997	141	3160754733	59205289	0.0187314	8.47524e-07	93.6007	47.3993
	noncanon	2019	5	HERVH	8790	212	3160754733	59205289	0.0187314	4.76324e-05	164.649	47.3512
	noncanon	5440	X	HERVFB	8314	203	3160754733	59205289	0.0187314	3.56532e-05	155.733	47.2673
	noncanon	4053	13	HERVFA	9333	222	3160754733	59205289	0.0187314	6.83601e-05	174.82	47.1801
	noncanon	1691	4	HERVH	5233	145	3160754733	59205289	0.0187314	1.50716e-06	98.0213	46.9787
	noncanon	5736	X	HERVH48	4223	126	3160754733	59205289	0.0187314	2.15753e-07	79.1026	46.8974
	canon	3393	11	HERVH	6787	174	3160754733	59205289	0.0187314	1.13037e-05	127.13	46.8701
	canon	2644	7	HML1	5624	152	3160754733	59205289	0.0187314	3.08292e-06	105.345	46.6547
	noncanon	1997	5	HERVH	6856	175	3160754733	59205289	0.0187314	1.32884e-05	128.422	46.5777
	noncanon	4197	14	HERVH	6754	173	3160754733	59205289	0.0187314	1.23762e-05	126.512	46.4883
	canon	2325	6	HERVH	5687	153	3160754733	59205289	0.0187314	3.59888e-06	106.525	46.4747
	canon	1120	3	HML8	8998	215	3160754733	59205289	0.0187314	6.78253e-05	168.545	46.4551
	noncanon	1424	4	HERVW	5529	150	3160754733	59205289	0.0187314	2.93043e-06	103.566	46.4342
	noncanon	4615	19	HERVIP	12686	284	3160754733	59205289	0.0187314	0.000311135	237.626	46.3737
	canon	506	2	HERVH	7095	179	3160754733	59205289	0.0187314	1.92539e-05	132.899	46.1009
	noncanon	5727	X	MLT	12862	287	3160754733	59205289	0.0187314	0.000345233	240.923	46.077
	canon	2187	6	HERVH	8335	202	3160754733	59205289	0.0187314	5.26326e-05	156.126	45.874
	noncanon	1962	5	HERVH	7855	193	3160754733	59205289	0.0187314	3.79755e-05	147.135	45.865
	canon	697	2	HERVH	6578	169	3160754733	59205289	0.0187314	1.30371e-05	123.215	45.785
	noncanon	988	3	HML3	3805	117	3160754733	59205289	0.0187314	1.33235e-07	71.2729	45.7271
	canon	505	2	HERVH	5727	153	3160754733	59205289	0.0187314	5.00869e-06	107.275	45.7254
	canon	3497	11	MER52	3969	120	3160754733	59205289	0.0187314	2.12395e-07	74.3448	45.6552
	noncanon	4376	16	HARLEQUIN	6426	166	3160754733	59205289	0.0187314	1.17227e-05	120.368	45.6322
	canon	1356	4	HEPSI	6320	164	3160754733	59205289	0.0187314	1.05218e-05	118.382	45.6177
	noncanon	1374	4	HARLEQUIN	7603	188	3160754733	59205289	0.0187314	3.4083e-05	142.415	45.5853
	noncanon	1942	5	HUERSP3	6006	158	3160754733	59205289	0.0187314	7.68174e-06	112.501	45.4993
	noncanon	735	2	HERVL	5261	144	3160754733	59205289	0.0187314	2.88759e-06	98.5458	45.4542
	canon	1161	3	HERVL	7993	195	3160754733	59205289	0.0187314	4.91873e-05	149.72	45.2801
	noncanon	1740	4	PRIMA41	10508	242	3160754733	59205289	0.0187314	0.000188221	196.829	45.1707
	canon	4377	16	HERVH	9177	217	3160754733	59205289	0.0187314	0.000104259	171.898	45.1022
	canon	1593	4	HML3	6033	158	3160754733	59205289	0.0187314	9.45371e-06	113.006	44.9936
	canon	4497	18	HERVW	4166	123	3160754733	59205289	0.0187314	4.73891e-07	78.0349	44.9651
	noncanon	1532	4	HML3	6312	163	3160754733	59205289	0.0187314	1.38562e-05	118.232	44.7675
	canon	2611	7	HERVH	4931	137	3160754733	59205289	0.0187314	2.38303e-06	92.3644	44.6356
	noncanon	3868	12	HERVH	7928	193	3160754733	59205289	0.0187314	5.82073e-05	148.502	44.4976
	canon	1799	5	HERV9	5529	148	3160754733	59205289	0.0187314	6.20868e-06	103.566	44.4342
	canon	582	2	HERVH	5108	140	3160754733	59205289	0.0187314	3.57451e-06	95.6799	44.3201
	noncanon	1503	4	HARLEQUIN	6176	160	3160754733	59205289	0.0187314	1.39532e-05	115.685	44.315
	noncanon	1132	3	HERVH	6766	171	3160754733	59205289	0.0187314	2.52805e-05	126.736	44.2635
	noncanon	5696	X	HERVH	8112	196	3160754733	59205289	0.0187314	7.38856e-05	151.949	44.0511
	noncanon	2871	8	HERVH	4868	135	3160754733	59205289	0.0187314	2.99998e-06	91.1843	43.8157
	canon	5985	1	HERVH	5991	156	3160754733	59205289	0.0187314	1.36695e-05	112.22	43.7803
	canon	4195	14	MER52	4444	127	3160754733	59205289	0.0187314	1.45778e-06	83.2422	43.7578
	canon	3415	11	HERVIP	7922	192	3160754733	59205289	0.0187314	7.35539e-05	148.39	43.61
	noncanon	596	2	HERVH	7335	181	3160754733	59205289	0.0187314	4.89885e-05	137.395	43.6053
	canon	6281	22	HERVH	5418	145	3160754733	59205289	0.0187314	7.53099e-06	101.487	43.5134
	noncanon	5588	X	HERVL	7503	184	3160754733	59205289	0.0187314	5.77081e-05	140.542	43.4585
	canon	3321	10	HERVH	7241	179	3160754733	59205289	0.0187314	4.88661e-05	135.634	43.3661
	canon	667	2	HERVL	4098	120	3160754733	59205289	0.0187314	9.11546e-07	76.7612	43.2388
	noncanon	6075	1	HERVH	9439	220	3160754733	59205289	0.0187314	0.000184525	176.805	43.1945
	noncanon	4700	19	HERVE	8799	208	3160754733	59205289	0.0187314	0.000135941	164.817	43.1826
	canon	3155	9	HERVH	5766	151	3160754733	59205289	0.0187314	1.38942e-05	108.005	42.9949
	canon	1507	4	HML3	4059	119	3160754733	59205289	0.0187314	9.48832e-07	76.0307	42.9693
	canon	775	2	HERVL	5130	139	3160754733	59205289	0.0187314	6.3772e-06	96.092	42.908
	noncanon	858	3	HERVIP	8777	207	3160754733	59205289	0.0187314	0.000154692	164.405	42.5947
	canon	753	2	HERVH	5734	150	3160754733	59205289	0.0187314	1.53839e-05	107.406	42.5943
	noncanon	3421	11	HERVH	10382	237	3160754733	59205289	0.0187314	0.000311146	194.469	42.5308
	noncanon	1077	3	HERVW	9688	224	3160754733	59205289	0.0187314	0.000237988	181.47	42.5304
	canon	2171	6	HERVH	6273	160	3160754733	59205289	0.0187314	2.78647e-05	117.502	42.4981
	noncanon	5820	1	HML2	5104	138	3160754733	59205289	0.0187314	7.47183e-06	95.6049	42.3951
	canon	4141	14	HERVH	6338	161	3160754733	59205289	0.0187314	3.17373e-05	118.719	42.2805
	noncanon	6174	1	HERVH	6821	170	3160754733	59205289	0.0187314	4.89041e-05	127.767	42.2333
	canon	3024	9	HERVH	5809	151	3160754733	59205289	0.0187314	1.92034e-05	108.811	42.1894
	noncanon	2482	7	LTR25	10029	230	3160754733	59205289	0.0187314	0.000295834	187.857	42.143
	noncanon	6114	1	HERV9	9448	219	3160754733	59205289	0.0187314	0.000240305	176.974	42.0259
	noncanon	4366	16	HML1	8488	201	3160754733	59205289	0.0187314	0.0001535	158.992	42.0081
	canon	4405	16	HERVH	4069	118	3160754733	59205289	0.0187314	1.66793e-06	76.218	41.782
	canon	2310	6	MER52	4980	135	3160754733	59205289	0.0187314	8.11866e-06	93.2823	41.7177
	noncanon	3835	12	MST	7919	190	3160754733	59205289	0.0187314	0.000121858	148.334	41.6662
	noncanon	2674	7	HML9	4242	121	3160754733	59205289	0.0187314	2.60841e-06	79.4585	41.5415
	noncanon	5808	1	HERVH	9104	212	3160754733	59205289	0.0187314	0.000234222	170.53	41.4695
	noncanon	1544	4	HERVH	7026	173	3160754733	59205289	0.0187314	7.29476e-05	131.607	41.3933
	noncanon	3495	11	HML1	2866	95	3160754733	59205289	0.0187314	7.61039e-08	53.6841	41.3159
	canon	4142	14	HERVH	6500	163	3160754733	59205289	0.0187314	5.03682e-05	121.754	41.246
	canon	6024	1	HERVH	6238	158	3160754733	59205289	0.0187314	4.11985e-05	116.846	41.1537
	noncanon	2054	5	HERVE	8485	200	3160754733	59205289	0.0187314	0.000192149	158.936	41.0643
	noncanon	4038	13	HERVH	7474	181	3160754733	59205289	0.0187314	0.00011029	139.998	41.0017
	noncanon	1310	4	HERVE	13827	300	3160754733	59205289	0.0187314	0.000999081	258.999	41.0012
	noncanon	1722	4	HERVH	5291	140	3160754733	59205289	0.0187314	1.65845e-05	99.1077	40.8923
	canon	2628	7	HERVH	5776	149	3160754733	59205289	0.0187314	2.9436e-05	108.192	40.8076
	noncanon	1921	5	HERVH	7387	179	3160754733	59205289	0.0187314	0.000115104	138.369	40.6313
	noncanon	2039	5	HARLEQUIN	6430	161	3160754733	59205289	0.0187314	5.84196e-05	120.443	40.5572
	canon	3962	13	HERVH	5741	148	3160754733	59205289	0.0187314	3.18136e-05	107.537	40.4632
	canon	1244	3	HERVH	8680	203	3160754733	59205289	0.0187314	0.000245717	162.588	40.4116
	canon	1936	5	HERVH	7242	176	3160754733	59205289	0.0187314	0.000113039	135.653	40.3474
	noncanon	5922	1	MLT	6872	169	3160754733	59205289	0.0187314	8.92886e-05	128.722	40.278
	noncanon	3772	12	HERVW	7517	181	3160754733	59205289	0.0187314	0.000139918	140.804	40.1962
	noncanon	1351	4	HERV9	6509	162	3160754733	59205289	0.0187314	7.18248e-05	121.923	40.0775
	canon	4881	21	HERVH	5610	145	3160754733	59205289	0.0187314	3.32845e-05	105.083	39.917
	noncanon	1163	3	HML2	15595	332	3160754733	59205289	0.0187314	0.00154965	292.116	39.8842
	canon	3070	9	HERVH	8015	190	3160754733	59205289	0.0187314	0.000201271	150.132	39.868
	canon	1737	4	HERVH	6415	160	3160754733	59205289	0.0187314	7.14798e-05	120.162	39.8382
	canon	547	2	HERVH	8179	193	3160754733	59205289	0.0187314	0.00022282	153.204	39.7961
	noncanon	4338	16	HERVH	12622	276	3160754733	59205289	0.0187314	0.00098513	236.427	39.5726
	noncanon	4222	14	HERVIP	9313	214	3160754733	59205289	0.0187314	0.000387505	174.445	39.5547
	noncanon	886	3	HML3	2702	90	3160754733	59205289	0.0187314	1.28852e-07	50.6122	39.3878
	canon	2427	7	HUERSP2	6495	161	3160754733	59205289	0.0187314	8.80852e-05	121.66	39.3397
	noncanon	669	2	HERVT	2976	95	3160754733	59205289	0.0187314	3.61018e-07	55.7446	39.2554
	noncanon	3864	12	HERVH	8904	206	3160754733	59205289	0.0187314	0.000354056	166.784	39.2158
	noncanon	4865	21	HERVH	5972	151	3160754733	59205289	0.0187314	6.06876e-05	111.864	39.1362
	noncanon	4161	14	HERVL	8962	207	3160754733	59205289	0.0187314	0.000369431	167.871	39.1294
	noncanon	3434	11	THE	8215	193	3160754733	59205289	0.0187314	0.000265962	153.878	39.1217
	canon	2917	8	HERVH	6187	155	3160754733	59205289	0.0187314	7.36741e-05	115.891	39.109
	noncanon	4699	19	HERVH	9446	216	3160754733	59205289	0.0187314	0.000451197	176.937	39.0634
	noncanon	975	3	HERVH	6522	161	3160754733	59205289	0.0187314	0.00010396	122.166	38.834
	canon	2819	8	HERV9	8191	192	3160754733	59205289	0.0187314	0.000298882	153.429	38.5713
	noncanon	1611	4	HERVW	2060	77	3160754733	59205289	0.0187314	1.21481e-08	38.5866	38.4134
	noncanon	2866	8	HML9	9330	213	3160754733	59205289	0.0187314	0.000512762	174.764	38.2363
	noncanon	4251	15	HERVH	5169	135	3160754733	59205289	0.0187314	3.72119e-05	96.8225	38.1775
	canon	2612	7	HERVH	6344	157	3160754733	59205289	0.0187314	0.000110073	118.832	38.1681
	canon	2658	7	HERVH	5387	139	3160754733	59205289	0.0187314	4.83582e-05	100.906	38.0941
	noncanon	4403	16	HERVH	9446	215	3160754733	59205289	0.0187314	0.000553081	176.937	38.0634
	noncanon	915	3	HERV1	4220	117	3160754733	59205289	0.0187314	1.1333e-05	79.0464	37.9536
	noncanon	5675	X	HML1	7530	179	3160754733	59205289	0.0187314	0.000248513	141.047	37.9527
	noncanon	4095	14	THE	8067	189	3160754733	59205289	0.0187314	0.000329838	151.106	37.894
	canon	3257	10	HERVH	5839	147	3160754733	59205289	0.0187314	8.59075e-05	109.373	37.6275
	canon	4242	15	HML3	6854	166	3160754733	59205289	0.0187314	0.000182638	128.385	37.6151
	canon	774	2	HERVH	6004	150	3160754733	59205289	0.0187314	0.000101385	112.463	37.5368
	canon	4221	14	HERVH	6167	153	3160754733	59205289	0.0187314	0.000117185	115.516	37.4836
	canon	4646	19	HERV3	7081	170	3160754733	59205289	0.0187314	0.000224003	132.637	37.3631
	noncanon	690	2	HERV9	7669	181	3160754733	59205289	0.0187314	0.0003092	143.651	37.3491
	noncanon	1051	3	HML3	2828	90	3160754733	59205289	0.0187314	7.69394e-07	52.9723	37.0277
	canon	3018	9	HERVH	5551	141	3160754733	59205289	0.0187314	8.0195e-05	103.978	37.0221
	noncanon	2255	6	HERVW	15215	322	3160754733	59205289	0.0187314	0.00214198	284.998	37.0021
	canon	4088	14	HERVL	6354	156	3160754733	59205289	0.0187314	0.000155297	119.019	36.9808
	canon	4647	19	HML1	2138	77	3160754733	59205289	0.0187314	5.12685e-08	40.0477	36.9523
	canon	3302	10	HERVIP	9399	213	3160754733	59205289	0.0187314	0.000680326	176.056	36.9438
	canon	4577	18	PRIMA41	11430	251	3160754733	59205289	0.0187314	0.0011789	214.1	36.9004
	noncanon	6226	1	HERVH	8016	187	3160754733	59205289	0.0187314	0.00040932	150.151	36.8493
	noncanon	4194	14	HERVH	6741	163	3160754733	59205289	0.0187314	0.000214929	126.268	36.7318
	noncanon	3037	9	HML1	8451	195	3160754733	59205289	0.0187314	0.000508131	158.299	36.7011
	noncanon	2139	6	HML7	8455	195	3160754733	59205289	0.0187314	0.000517213	158.374	36.6262
	noncanon	1073	3	HERVW	15879	334	3160754733	59205289	0.0187314	0.00243521	297.436	36.5645
	noncanon	2033	5	HERVH	7235	172	3160754733	59205289	0.0187314	0.000305014	135.522	36.4785
	canon	3002	9	HERVH	4944	129	3160754733	59205289	0.0187314	5.34644e-05	92.6079	36.3921
	noncanon	2112	6	HERVIP	8795	201	3160754733	59205289	0.0187314	0.00063531	164.742	36.2575
	noncanon	2236	6	HERVW	2930	91	3160754733	59205289	0.0187314	1.69973e-06	54.8829	36.1171
	canon	960	3	HERVIP	6187	152	3160754733	59205289	0.0187314	0.000176075	115.891	36.109
	noncanon	2921	8	HERV9	6028	149	3160754733	59205289	0.0187314	0.000157778	112.913	36.0873
	noncanon	508	2	HERVH	5606	141	3160754733	59205289	0.0187314	0.000115859	105.008	35.9919
	noncanon	3428	11	HERVW	6890	165	3160754733	59205289	0.0187314	0.000288316	129.059	35.9408
	canon	2602	7	HERVW	4064	112	3160754733	59205289	0.0187314	2.0444e-05	76.1243	35.8757
	noncanon	4807	20	MER52	8869	202	3160754733	59205289	0.0187314	0.000705424	166.129	35.8714
	noncanon	3385	11	HERVH	6162	151	3160754733	59205289	0.0187314	0.000200684	115.423	35.5773
	canon	2940	8	HERVH	5949	147	3160754733	59205289	0.0187314	0.00017267	111.433	35.567
	noncanon	3081	9	HERVH	8142	188	3160754733	59205289	0.0187314	0.000583495	152.511	35.4891
	canon	5878	1	HML8	5367	136	3160754733	59205289	0.0187314	0.000110409	100.531	35.4687
	noncanon	3595	11	HERVIP	8412	193	3160754733	59205289	0.0187314	0.000655593	157.568	35.4317
	canon	4375	16	HML6	7670	179	3160754733	59205289	0.0187314	0.000495182	143.67	35.3303
	canon	1445	4	HERVH48	4791	125	3160754733	59205289	0.0187314	6.65915e-05	89.742	35.258
	canon	2239	6	HERVW	5649	141	3160754733	59205289	0.0187314	0.000152981	105.814	35.1865
	canon	3191	10	HERVH	5922	146	3160754733	59205289	0.0187314	0.0001949	110.927	35.0728
	noncanon	3306	10	MER4	2296	78	3160754733	59205289	0.0187314	3.74365e-07	43.0072	34.9928
	canon	2394	6	HERVH	5828	144	3160754733	59205289	0.0187314	0.000194719	109.166	34.8335
	canon	5531	X	MER52	7432	174	3160754733	59205289	0.0187314	0.000503319	139.212	34.7884
	noncanon	2841	8	MER72	10654	234	3160754733	59205289	0.0187314	0.0014942	199.564	34.4359
	canon	662	2	HERVH	5529	138	3160754733	59205289	0.0187314	0.000173686	103.566	34.4342
	noncanon	4472	17	HERV9	2278	77	3160754733	59205289	0.0187314	5.23115e-07	42.6701	34.3299
	noncanon	2230	6	HERVW	14688	309	3160754733	59205289	0.0187314	0.0029686	275.126	33.8735
	canon	2595	7	HERVH	5733	141	3160754733	59205289	0.0187314	0.000257032	107.387	33.613
	canon	4318	15	HERVH	5734	141	3160754733	59205289	0.0187314	0.000258576	107.406	33.5943
	noncanon	4137	14	HERVH	8090	185	3160754733	59205289	0.0187314	0.000877903	151.537	33.4632
	noncanon	4685	19	HML5	5431	135	3160754733	59205289	0.0187314	0.000226621	101.73	33.2699
	noncanon	1659	4	HERVH	8056	184	3160754733	59205289	0.0187314	0.000934694	150.9	33.1
	canon	4136	14	HERVH	6298	151	3160754733	59205289	0.0187314	0.000431332	117.97	33.0298
	noncanon	1606	4	HERVL	4591	119	3160754733	59205289	0.0187314	0.000115382	85.9958	33.0042
	noncanon	5991	1	HERVL	5128	129	3160754733	59205289	0.0187314	0.000195293	96.0545	32.9455
	noncanon	3976	13	HERVH	7050	165	3160754733	59205289	0.0187314	0.000646596	132.056	32.9438
	canon	1798	5	MER52	4648	120	3160754733	59205289	0.0187314	0.00012521	87.0634	32.9366
	canon	4684	19	HML6	7587	175	3160754733	59205289	0.0187314	0.000821788	142.115	32.885
	noncanon	4662	19	HML6	11058	240	3160754733	59205289	0.0187314	0.00207381	207.132	32.8684
	canon	5316	X	HML5	6200	149	3160754733	59205289	0.0187314	0.000425125	116.135	32.8655
	canon	1271	3	HERV9	5615	138	3160754733	59205289	0.0187314	0.000295206	105.177	32.8233
	noncanon	6169	1	HARLEQUIN	6209	149	3160754733	59205289	0.0187314	0.000446284	116.303	32.6969
	canon	5732	X	HERVH	5945	144	3160754733	59205289	0.0187314	0.000386365	111.358	32.642
	noncanon	6157	1	HERV9	6854	161	3160754733	59205289	0.0187314	0.000637333	128.385	32.6151
	noncanon	2787	8	HML9	4452	116	3160754733	59205289	0.0187314	0.000113739	83.3921	32.6079
	canon	4176	14	HERVH	8352	189	3160754733	59205289	0.0187314	0.00115034	156.444	32.5555
	noncanon	6262	22	HERVH	5470	135	3160754733	59205289	0.0187314	0.000288263	102.461	32.5394
	canon	5735	X	HERVL	6594	156	3160754733	59205289	0.0187314	0.000579026	123.515	32.4853
	canon	3327	10	HERVW	3827	104	3160754733	59205289	0.0187314	5.81792e-05	71.685	32.315
	noncanon	3998	13	HML5	3512	98	3160754733	59205289	0.0187314	3.73649e-05	65.7846	32.2154
	noncanon	3682	12	HERVL	6084	146	3160754733	59205289	0.0187314	0.0004917	113.962	32.0383
	canon	2959	8	HERVH	5882	142	3160754733	59205289	0.0187314	0.000461628	110.178	31.822
	canon	528	2	HERVH	8660	194	3160754733	59205289	0.0187314	0.00145866	162.214	31.7863
	noncanon	4828	20	HERV9	6899	161	3160754733	59205289	0.0187314	0.000790313	129.228	31.7722
	canon	1552	4	HML1	4829	122	3160754733	59205289	0.0187314	0.000232167	90.4538	31.5462
	noncanon	6095	1	HERVH	7819	178	3160754733	59205289	0.0187314	0.0011837	146.461	31.5394
	noncanon	1932	5	HERVH	8781	196	3160754733	59205289	0.0187314	0.00158267	164.48	31.5198
	canon	770	2	HERVH	6062	145	3160754733	59205289	0.0187314	0.000564093	113.55	31.4504
	noncanon	3413	11	HERVH	10925	236	3160754733	59205289	0.0187314	0.00254173	204.64	31.3597
	canon	4061	14	HERVIP	12375	263	3160754733	59205289	0.0187314	0.00319553	231.801	31.1992
	canon	3320	10	HERVH	5766	139	3160754733	59205289	0.0187314	0.000534707	108.005	30.9949
	noncanon	1153	3	HERV1	7269	167	3160754733	59205289	0.0187314	0.00112587	136.158	30.8416
	noncanon	1580	4	MST	19292	392	3160754733	59205289	0.0187314	0.00561342	361.366	30.6343
	canon	607	2	HERVH	6967	161	3160754733	59205289	0.0187314	0.0010795	130.502	30.4985
	canon	1427	4	MER52	4252	110	3160754733	59205289	0.0187314	0.000197193	79.6458	30.3542
	noncanon	3004	9	MER66	9702	212	3160754733	59205289	0.0187314	0.00241501	181.732	30.2682
	canon	2459	7	HERVH	5435	132	3160754733	59205289	0.0187314	0.000539243	101.805	30.195
	noncanon	1753	5	HERVH	12643	267	3160754733	59205289	0.0187314	0.00375363	236.821	30.1792
	canon	5320	X	HERVH	8693	193	3160754733	59205289	0.0187314	0.0019707	162.832	30.1681
	noncanon	1912	5	HERVH	13559	284	3160754733	59205289	0.0187314	0.004189	253.979	30.0213
	noncanon	1276	3	HERVH	6192	146	3160754733	59205289	0.0187314	0.000858776	115.985	30.0153
	noncanon	4128	14	HERV4	10570	228	3160754733	59205289	0.0187314	0.00292674	197.991	30.0093
	noncanon	6230	1	HML4	4806	120	3160754733	59205289	0.0187314	0.000366908	90.023	29.977
	noncanon	2964	8	HERVH	5449	132	3160754733	59205289	0.0187314	0.000583577	102.067	29.9327
	canon	2076	6	HERVH	5726	137	3160754733	59205289	0.0187314	0.000721061	107.256	29.7441
	canon	4182	14	HERVL	5793	138	3160754733	59205289	0.0187314	0.00079731	108.511	29.4891
	noncanon	2128	6	HERV3	5633	135	3160754733	59205289	0.0187314	0.000731	105.514	29.4862
	canon	789	2	HERVH	8259	184	3160754733	59205289	0.0187314	0.00206509	154.702	29.2976
	canon	496	2	HUERSP3	7621	172	3160754733	59205289	0.0187314	0.00174781	142.752	29.2482
	canon	4878	21	HERVS	6981	160	3160754733	59205289	0.0187314	0.00142052	130.764	29.2363
	noncanon	3192	10	HML2	9013	198	3160754733	59205289	0.0187314	0.00251002	168.826	29.1741
	canon	2827	8	HML3	6990	160	3160754733	59205289	0.0187314	0.00147605	130.932	29.0677
	noncanon	1678	4	HUERSP3	6296	147	3160754733	59205289	0.0187314	0.00112396	117.933	29.0672
	canon	5829	1	HERVH	7846	176	3160754733	59205289	0.0187314	0.00194245	146.966	29.0336
	noncanon	1372	4	HERVW	12979	272	3160754733	59205289	0.0187314	0.00453401	243.115	28.8855
	noncanon	2393	6	HERVH	7856	176	3160754733	59205289	0.0187314	0.00201692	147.154	28.8463
	canon	1661	4	HML5	4020	104	3160754733	59205289	0.0187314	0.000270252	75.3001	28.6999
	noncanon	1309	4	HERVE	4770	118	3160754733	59205289	0.0187314	0.000526468	89.3487	28.6513
	canon	994	3	HML8	8508	188	3160754733	59205289	0.0187314	0.00246311	159.367	28.6334
	noncanon	4754	19	MER21	5257	127	3160754733	59205289	0.0187314	0.000752947	98.4708	28.5292
	noncanon	5593	X	HML3	6972	159	3160754733	59205289	0.0187314	0.00168142	130.595	28.4048
	noncanon	6132	1	HERVH	7574	170	3160754733	59205289	0.0187314	0.00213385	141.871	28.1285
	noncanon	3833	12	MER84	4640	115	3160754733	59205289	0.0187314	0.000563121	86.9136	28.0864
	noncanon	5327	X	HERVH48	8865	194	3160754733	59205289	0.0187314	0.00297657	166.054	27.9463
	noncanon	2228	6	MER61	6517	150	3160754733	59205289	0.0187314	0.00158085	122.072	27.9276
	noncanon	4605	19	HML3	8439	186	3160754733	59205289	0.0187314	0.00273574	158.074	27.9259
	noncanon	1589	4	HERVH	6002	140	3160754733	59205289	0.0187314	0.0013908	112.426	27.5743
	noncanon	2692	8	MLT	11448	242	3160754733	59205289	0.0187314	0.00457569	214.437	27.5632
	canon	6094	1	HERV9	9263	201	3160754733	59205289	0.0187314	0.00343803	173.509	27.4913
	canon	5996	1	HERVH	8516	187	3160754733	59205289	0.0187314	0.00299338	159.516	27.4836
	noncanon	4523	18	HERVH	6381	147	3160754733	59205289	0.0187314	0.00165527	119.525	27.4751
	noncanon	3255	10	HML3	3020	84	3160754733	59205289	0.0187314	0.000120052	56.5688	27.4312
	noncanon	2181	6	HERV9	942	45	3160754733	59205289	0.0187314	1.54913e-08	17.645	27.355
	canon	4528	18	HERVIP	4846	118	3160754733	59205289	0.0187314	0.0008267	90.7723	27.2277
	noncanon	4653	19	HML6	3512	93	3160754733	59205289	0.0187314	0.0002579	65.7846	27.2154
	noncanon	3017	9	HERV9	7464	167	3160754733	59205289	0.0187314	0.00246655	139.811	27.189
	canon	973	3	HERVL	5064	122	3160754733	59205289	0.0187314	0.000965896	94.8557	27.1443
	noncanon	3891	12	HML3	6241	144	3160754733	59205289	0.0187314	0.00170293	116.903	27.0975
	canon	5666	X	HERVH	6247	144	3160754733	59205289	0.0187314	0.00174871	117.015	26.9851
	noncanon	2268	6	HERVS	7157	161	3160754733	59205289	0.0187314	0.00237622	134.06	26.9395
	noncanon	1829	5	HERVH	11698	246	3160754733	59205289	0.0187314	0.00510256	219.12	26.8804
	noncanon	4565	18	HERVE	7374	165	3160754733	59205289	0.0187314	0.00255222	138.125	26.8748
	noncanon	3986	13	HERVH	7006	158	3160754733	59205289	0.0187314	0.00235126	131.232	26.768
	canon	6177	1	HERVH	8074	178	3160754733	59205289	0.0187314	0.00307674	151.237	26.7629
	noncanon	1763	5	HERVL	6003	139	3160754733	59205289	0.0187314	0.00174764	112.444	26.5555
	canon	2599	7	HERVH	7448	166	3160754733	59205289	0.0187314	0.00279107	139.511	26.4887
	canon	3633	11	HERVFRD	6764	153	3160754733	59205289	0.0187314	0.00239622	126.699	26.301
	noncanon	4682	19	HERV3	7887	174	3160754733	59205289	0.0187314	0.00321463	147.734	26.2656
	noncanon	3038	9	HML1	5171	123	3160754733	59205289	0.0187314	0.00132279	96.86	26.14
	noncanon	1440	4	HERVH	6720	152	3160754733	59205289	0.0187314	0.00244748	125.875	26.1251
	noncanon	3498	11	HERVADP	3412	90	3160754733	59205289	0.0187314	0.000343007	63.9115	26.0885
	noncanon	5437	X	HERVH	16493	335	3160754733	59205289	0.0187314	0.00739662	308.937	26.0634
	noncanon	1176	3	HERVFB	5876	136	3160754733	59205289	0.0187314	0.00190582	110.066	25.9344
	noncanon	6129	1	HERVIP	8601	187	3160754733	59205289	0.0187314	0.00392297	161.109	25.8914
	noncanon	3784	12	HERVH	5879	136	3160754733	59205289	0.0187314	0.00193172	110.122	25.8782
	noncanon	4547	18	HERVH	6680	151	3160754733	59205289	0.0187314	0.00253981	125.126	25.8744
	canon	3799	12	HERVH	5828	135	3160754733	59205289	0.0187314	0.00191222	109.166	25.8335
	canon	2424	7	HERVL	5936	137	3160754733	59205289	0.0187314	0.00200381	111.189	25.8105
	canon	1501	4	HERVE	8934	193	3160754733	59205289	0.0187314	0.00429504	167.346	25.6539
	noncanon	4809	20	HML3	3177	85	3160754733	59205289	0.0187314	0.000320558	59.5096	25.4904
	canon	1711	4	HERVH	6706	151	3160754733	59205289	0.0187314	0.00281148	125.613	25.3874
	noncanon	5546	X	PRIMA4	14083	289	3160754733	59205289	0.0187314	0.00720706	263.794	25.206
	canon	5743	X	HEPSI	4905	117	3160754733	59205289	0.0187314	0.00148424	91.8774	25.1226
	canon	875	3	PABL	8701	188	3160754733	59205289	0.0187314	0.00455182	162.982	25.0183
	noncanon	3353	10	HML6	3746	95	3160754733	59205289	0.0187314	0.000732095	70.1677	24.8323
	noncanon	4564	18	HML5	3266	86	3160754733	59205289	0.0187314	0.000454283	61.1767	24.8233
	canon	4109	14	HERVH	5890	135	3160754733	59205289	0.0187314	0.002512	110.328	24.6722
	noncanon	543	2	HERVH	7820	171	3160754733	59205289	0.0187314	0.00423237	146.479	24.5206
	canon	1866	5	HERVIP	8573	185	3160754733	59205289	0.0187314	0.00487926	160.584	24.4159
	noncanon	2104	6	HERVT	11671	243	3160754733	59205289	0.0187314	0.00678213	218.614	24.3861
	canon	1143	3	HERVH	8096	176	3160754733	59205289	0.0187314	0.00456613	151.649	24.3508
	canon	2038	5	HERVH	6233	141	3160754733	59205289	0.0187314	0.00305717	116.753	24.2473
	canon	6202	1	HERVH	7857	171	3160754733	59205289	0.0187314	0.00475492	147.172	23.8276
	noncanon	5728	X	THE	9948	210	3160754733	59205289	0.0187314	0.00638879	186.34	23.6603
	noncanon	989	3	HERVH	9148	195	3160754733	59205289	0.0187314	0.00587278	171.355	23.6454
	canon	4314	15	HERV9	7820	170	3160754733	59205289	0.0187314	0.00495605	146.479	23.5206
	noncanon	1937	5	HERVW	6060	137	3160754733	59205289	0.0187314	0.00337137	113.512	23.4879
	noncanon	1323	4	HERVH	6594	147	3160754733	59205289	0.0187314	0.00388953	123.515	23.4853
	canon	2664	7	HERV9	4252	103	3160754733	59205289	0.0187314	0.00162619	79.6458	23.3542
	noncanon	1299	4	HERVE	3561	90	3160754733	59205289	0.0187314	0.00100942	66.7024	23.2976
	noncanon	5292	X	HERVH	8476	182	3160754733	59205289	0.0187314	0.00570989	158.767	23.2328
	canon	3046	9	HERVH	5914	134	3160754733	59205289	0.0187314	0.00340185	110.777	23.2226
	canon	535	2	HERVE	6930	153	3160754733	59205289	0.0187314	0.00442087	129.808	23.1916
	noncanon	2679	7	HERVFC	8055	174	3160754733	59205289	0.0187314	0.00546745	150.881	23.1188
	canon	4232	14	HML5	4908	115	3160754733	59205289	0.0187314	0.00244493	91.9336	23.0664
	noncanon	4531	18	HUERSP2	8334	179	3160754733	59205289	0.0187314	0.00587899	156.107	22.8927
	canon	1584	4	HERVH	6041	136	3160754733	59205289	0.0187314	0.00379825	113.156	22.8438
	canon	4886	21	HERVL	6152	138	3160754733	59205289	0.0187314	0.00397242	115.235	22.7646
	noncanon	4286	15	HML1	6910	152	3160754733	59205289	0.0187314	0.00489391	129.434	22.5662
	noncanon	2863	8	HML3	3337	85	3160754733	59205289	0.0187314	0.00107053	62.5066	22.4934
	canon	2867	8	HERVH	5581	127	3160754733	59205289	0.0187314	0.00357876	104.54	22.4602
	noncanon	4138	14	MER51	7824	169	3160754733	59205289	0.0187314	0.00583685	146.554	22.4457
	canon	4018	13	HML9	8628	184	3160754733	59205289	0.0187314	0.006545	161.614	22.3857
	noncanon	740	2	HML5	5961	134	3160754733	59205289	0.0187314	0.00408931	111.658	22.3423
	canon	4757	19	HML6	7192	157	3160754733	59205289	0.0187314	0.00540276	134.716	22.2839
	noncanon	1953	5	HML3	3191	82	3160754733	59205289	0.0187314	0.00101958	59.7718	22.2282
	canon	700	2	HERVL	4969	115	3160754733	59205289	0.0187314	0.00324692	93.0762	21.9238
	canon	2699	8	HML8	7055	154	3160754733	59205289	0.0187314	0.00565189	132.15	21.8501
	noncanon	2621	7	HERVH	10478	218	3160754733	59205289	0.0187314	0.00835279	196.267	21.7326
	noncanon	5337	X	HUERSP3	6265	139	3160754733	59205289	0.0187314	0.00500238	117.352	21.6479
	noncanon	504	2	HERVH	8190	175	3160754733	59205289	0.0187314	0.00692498	153.41	21.59
	canon	900	3	HERVW	3708	91	3160754733	59205289	0.0187314	0.00189621	69.4559	21.5441
	noncanon	5594	X	HUERSP3	7930	170	3160754733	59205289	0.0187314	0.00682854	148.54	21.4602
	canon	2338	6	HERVH	5849	131	3160754733	59205289	0.0187314	0.00470584	109.56	21.4402
	noncanon	2340	6	HERVH	12741	260	3160754733	59205289	0.0187314	0.00970928	238.656	21.3435
	canon	686	2	HERVIP	8206	175	3160754733	59205289	0.0187314	0.00722693	153.71	21.2903
	noncanon	1267	3	HERVH	7462	161	3160754733	59205289	0.0187314	0.00663165	139.774	21.2265
	noncanon	502	2	HML3	5488	124	3160754733	59205289	0.0187314	0.00447118	102.798	21.2022
	noncanon	4649	19	HERVL66	11315	233	3160754733	59205289	0.0187314	0.00939904	211.946	21.0545
	canon	4267	15	HERVH	6246	138	3160754733	59205289	0.0187314	0.00557356	116.996	21.0038
	noncanon	1516	4	HERVH	4379	103	3160754733	59205289	0.0187314	0.00316636	82.0247	20.9753
	noncanon	1918	5	HERV9	5983	133	3160754733	59205289	0.0187314	0.00533285	112.07	20.9302
	noncanon	5439	X	HML5	8389	178	3160754733	59205289	0.0187314	0.0078016	157.138	20.8625
	noncanon	4268	15	HML5	12406	253	3160754733	59205289	0.0187314	0.0102351	232.381	20.6185
	noncanon	5818	1	HERVIP	8670	183	3160754733	59205289	0.0187314	0.0082889	162.401	20.599
	noncanon	1948	5	HML3	1464	48	3160754733	59205289	0.0187314	9.30665e-05	27.4227	20.5773
	noncanon	2089	6	HERV9	4561	106	3160754733	59205289	0.0187314	0.00375479	85.4338	20.5662
	canon	3284	10	HML8	5312	120	3160754733	59205289	0.0187314	0.00488207	99.5011	20.4989
	canon	2966	8	HERVH	5852	130	3160754733	59205289	0.0187314	0.00570749	109.616	20.384
	noncanon	2500	7	HML3	3627	88	3160754733	59205289	0.0187314	0.00271234	67.9387	20.0613
	canon	4218	14	HERVH	5818	129	3160754733	59205289	0.0187314	0.00604105	108.979	20.0208
	noncanon	4697	19	HML8	2415	65	3160754733	59205289	0.0187314	0.00103391	45.2363	19.7637
	canon	4838	20	HERVH	5941	131	3160754733	59205289	0.0187314	0.00653089	111.283	19.7169
	canon	736	2	HERVH	5741	127	3160754733	59205289	0.0187314	0.00655248	107.537	19.4632
	noncanon	3941	13	HERVH	3926	93	3160754733	59205289	0.0187314	0.00370839	73.5394	19.4606
	canon	3350	10	MER52	4783	109	3160754733	59205289	0.0187314	0.00520094	89.5922	19.4078
	canon	1497	4	MER52	8843	185	3160754733	59205289	0.0187314	0.0097533	165.642	19.3584
	canon	3867	12	HERVH48	8097	171	3160754733	59205289	0.0187314	0.0092241	151.668	19.332
	noncanon	3628	11	HARLEQUIN	6710	145	3160754733	59205289	0.0187314	0.00791982	125.688	19.3125
	noncanon	4813	20	HERVH	10287	212	3160754733	59205289	0.0187314	0.0106469	192.69	19.3103
	noncanon	3863	12	HERV4	5111	115	3160754733	59205289	0.0187314	0.00587165	95.7361	19.2639
	noncanon	3758	12	HERVW	3194	79	3160754733	59205289	0.0187314	0.00263493	59.828	19.172
	canon	772	2	HERVH	5662	125	3160754733	59205289	0.0187314	0.00705477	106.057	18.9429
	noncanon	2593	7	HERVL	7485	159	3160754733	59205289	0.0187314	0.00933199	140.204	18.7956
	canon	1174	3	HERV9	3538	85	3160754733	59205289	0.0187314	0.00367235	66.2716	18.7284
	canon	5690	X	HUERSP3	8399	176	3160754733	59205289	0.0187314	0.0102321	157.325	18.6752
	noncanon	6104	1	HERV9	16942	336	3160754733	59205289	0.0187314	0.0127026	317.347	18.653
	noncanon	1995	5	HERVH	6320	137	3160754733	59205289	0.0187314	0.00831822	118.382	18.6177
	canon	4545	18	HERVH	5467	121	3160754733	59205289	0.0187314	0.00720373	102.404	18.5956
	noncanon	3254	10	HERV30	8673	181	3160754733	59205289	0.0187314	0.0105837	162.457	18.5428
	noncanon	4254	15	HML5	5152	115	3160754733	59205289	0.0187314	0.00684875	96.5041	18.4959
	canon	5663	X	HERV9	7613	161	3160754733	59205289	0.0187314	0.00994199	142.602	18.398
	noncanon	4664	19	HERVH	9216	191	3160754733	59205289	0.0187314	0.0111273	172.628	18.3716
	canon	5525	X	HUERSP3	5373	119	3160754733	59205289	0.0187314	0.00736813	100.644	18.3563
	canon	3859	12	HERVFRD	4793	108	3160754733	59205289	0.0187314	0.00660535	89.7795	18.2205
	noncanon	2242	6	HERV3	12912	260	3160754733	59205289	0.0187314	0.0126978	241.86	18.1405
	canon	1459	4	HML5	5706	125	3160754733	59205289	0.0187314	0.00816659	106.881	18.1188
	noncanon	1698	4	HML9	11100	226	3160754733	59205289	0.0187314	0.0122933	207.918	18.0817
	canon	3748	12	HERVH	6408	138	3160754733	59205289	0.0187314	0.00927403	120.031	17.9693
	noncanon	542	2	HML5	3045	75	3160754733	59205289	0.0187314	0.0033745	57.037	17.963
	canon	2543	7	HERVH	5717	125	3160754733	59205289	0.0187314	0.00846082	107.087	17.9127
	noncanon	3931	13	HML3	2313	61	3160754733	59205289	0.0187314	0.0019756	43.3257	17.6743
	canon	4806	20	HERVH	4823	108	3160754733	59205289	0.0187314	0.00740459	90.3414	17.6586
	canon	2093	6	HML5	7493	158	3160754733	59205289	0.0187314	0.0108155	140.354	17.6458
	canon	2448	7	HERVL	5041	112	3160754733	59205289	0.0187314	0.00789443	94.4249	17.5751
	noncanon	2172	6	HERV9	8785	182	3160754733	59205289	0.0187314	0.0120074	164.555	17.4449
	canon	4518	18	HERVIP	8201	171	3160754733	59205289	0.0187314	0.0117136	153.616	17.384
	noncanon	1703	4	HERVE	4945	110	3160754733	59205289	0.0187314	0.00801968	92.6267	17.3733
	canon	4152	14	HEPSI	5853	127	3160754733	59205289	0.0187314	0.00942018	109.635	17.3652
	noncanon	2846	8	HERVIP	12313	248	3160754733	59205289	0.0187314	0.013355	230.639	17.3606
	canon	5730	X	HERVH	4252	97	3160754733	59205289	0.0187314	0.00674904	79.6458	17.3542
	canon	4165	14	HUERSP1	7731	162	3160754733	59205289	0.0187314	0.0116316	144.812	17.1877
	noncanon	720	2	HERVH	3470	82	3160754733	59205289	0.0187314	0.00548546	64.9979	17.0021
	noncanon	3584	11	HUERSP3	8599	178	3160754733	59205289	0.0187314	0.012565	161.071	16.9289
	canon	962	3	HERVH	5722	124	3160754733	59205289	0.0187314	0.010056	107.181	16.8191
	noncanon	4654	19	HML3	10476	213	3160754733	59205289	0.0187314	0.0135631	196.23	16.7701
	noncanon	3372	10	HML3	3597	84	3160754733	59205289	0.0187314	0.00632726	67.3768	16.6232
	canon	2129	6	HERVH	7337	154	3160754733	59205289	0.0187314	0.0121891	137.432	16.5679
	canon	976	3	MER52	3816	88	3160754733	59205289	0.0187314	0.0070093	71.4789	16.5211
	noncanon	1531	4	HML3	5472	119	3160754733	59205289	0.0187314	0.0101944	102.498	16.5019
	noncanon	1097	3	HERVE	5368	117	3160754733	59205289	0.0187314	0.0101211	100.55	16.45
	canon	701	2	HERVL	6598	140	3160754733	59205289	0.0187314	0.0117408	123.59	16.4104
	noncanon	3250	10	HERVH	10823	219	3160754733	59205289	0.0187314	0.0142329	202.73	16.2703
	noncanon	1136	3	HERV9	7052	148	3160754733	59205289	0.0187314	0.0129428	132.094	15.9063
	noncanon	3505	11	HML2	9511	194	3160754733	59205289	0.0187314	0.0143911	178.154	15.8459
	noncanon	4133	14	HERVH	9218	188	3160754733	59205289	0.0187314	0.0149671	172.666	15.3342
	canon	4077	14	HERVW	7620	158	3160754733	59205289	0.0187314	0.0143397	142.733	15.2669
	canon	3593	11	HML7	6562	138	3160754733	59205289	0.0187314	0.0138405	122.915	15.0847
	noncanon	2525	7	HUERSP3	18903	369	3160754733	59205289	0.0187314	0.0152869	354.079	14.9208
	canon	4393	16	HERVH	7920	163	3160754733	59205289	0.0187314	0.0154498	148.353	14.6475
	noncanon	2035	5	HERVH	7441	154	3160754733	59205289	0.0187314	0.0152464	139.38	14.6198
	noncanon	4658	19	HERVI	9471	192	3160754733	59205289	0.0187314	0.0160203	177.405	14.5951
	noncanon	1383	4	HERVW	9047	184	3160754733	59205289	0.0187314	0.0160039	169.463	14.5372
	noncanon	3781	12	HUERSP2	6701	140	3160754733	59205289	0.0187314	0.0149851	125.519	14.481
	canon	5606	X	HERVH	4886	106	3160754733	59205289	0.0187314	0.0128866	91.5215	14.4785
	canon	4667	19	HERV3	6973	145	3160754733	59205289	0.0187314	0.0153417	130.614	14.3861
	noncanon	4342	16	HERVH	6174	130	3160754733	59205289	0.0187314	0.0147632	115.648	14.3525
	canon	5980	1	HERVH	6815	142	3160754733	59205289	0.0187314	0.0153019	127.654	14.3457
	canon	2395	6	HERVL	6763	141	3160754733	59205289	0.0187314	0.0153094	126.68	14.3197
	noncanon	4606	19	HML6	6925	144	3160754733	59205289	0.0187314	0.0154807	129.715	14.2852
	canon	645	2	HML3	6558	137	3160754733	59205289	0.0187314	0.015437	122.84	14.1596
	noncanon	1768	5	HML5	2555	62	3160754733	59205289	0.0187314	0.00729268	47.8587	14.1413
	noncanon	6079	1	HML2	9175	186	3160754733	59205289	0.0187314	0.0165816	171.86	14.1396
	noncanon	5082	Y	HML1	2289	57	3160754733	59205289	0.0187314	0.00622051	42.8761	14.1239
	noncanon	1342	4	HERVH	5450	116	3160754733	59205289	0.0187314	0.0148217	102.086	13.914
	canon	3158	9	HERVH	5558	118	3160754733	59205289	0.0187314	0.0149954	104.109	13.891
	canon	1321	4	HERVH	5720	121	3160754733	59205289	0.0187314	0.0152427	107.143	13.8565
	noncanon	1420	4	HERVL	5508	117	3160754733	59205289	0.0187314	0.0150633	103.172	13.8276
	noncanon	3414	11	HERVW	3965	88	3160754733	59205289	0.0187314	0.0126637	74.2699	13.7301
	canon	4177	14	HERV3	6692	139	3160754733	59205289	0.0187314	0.0164399	125.35	13.6496
	canon	5943	1	HERVH	6162	129	3160754733	59205289	0.0187314	0.0161938	115.423	13.5773
	noncanon	2598	7	MST	15559	305	3160754733	59205289	0.0187314	0.0168047	291.441	13.5585
	canon	3977	13	HERVH	6326	132	3160754733	59205289	0.0187314	0.0164558	118.495	13.5053
	canon	519	2	HERVH	7880	161	3160754733	59205289	0.0187314	0.017391	147.603	13.3967
	noncanon	5590	X	HML5	9055	183	3160754733	59205289	0.0187314	0.0176156	169.613	13.3874
	canon	1822	5	HERVL	6342	132	3160754733	59205289	0.0187314	0.0170316	118.794	13.2056
	canon	1708	4	HERVH	5012	107	3160754733	59205289	0.0187314	0.0159316	93.8817	13.1183
	canon	6115	1	PRIMA41	8162	166	3160754733	59205289	0.0187314	0.0179	152.886	13.1145
	noncanon	3790	12	HML1	4265	93	3160754733	59205289	0.0187314	0.0147425	79.8893	13.1107
	noncanon	6036	1	HERV9	4055	89	3160754733	59205289	0.0187314	0.0144732	75.9557	13.0443
	noncanon	5855	1	HERVH	6299	131	3160754733	59205289	0.0187314	0.0173745	117.989	13.0111
	noncanon	2566	7	HML3	5074	108	3160754733	59205289	0.0187314	0.016367	95.043	12.957
	canon	1217	3	MER52	2726	64	3160754733	59205289	0.0187314	0.0107255	51.0617	12.9383
	noncanon	1939	5	HERV4	11805	234	3160754733	59205289	0.0187314	0.0180986	221.124	12.8761
	noncanon	884	3	HERVE	7483	153	3160754733	59205289	0.0187314	0.0182076	140.167	12.8331
	canon	2259	6	HERVH	5578	117	3160754733	59205289	0.0187314	0.0178476	104.484	12.5164
	noncanon	2696	8	HERVE	11986	237	3160754733	59205289	0.0187314	0.0184834	224.514	12.4857
	noncanon	928	3	HERVH	8519	172	3160754733	59205289	0.0187314	0.0189863	159.573	12.4274
	noncanon	6056	1	MER66	13487	265	3160754733	59205289	0.0187314	0.0182608	252.63	12.3699
	canon	1054	3	HERVH	5862	122	3160754733	59205289	0.0187314	0.0187292	109.803	12.1967
	canon	1664	4	HERVH	5489	115	3160754733	59205289	0.0187314	0.0184951	102.817	12.1835
	noncanon	5472	X	HERVL	8218	166	3160754733	59205289	0.0187314	0.0195413	153.934	12.0655
	canon	2604	7	HML5	7526	153	3160754733	59205289	0.0187314	0.0195784	140.972	12.0277
	noncanon	1824	5	HARLEQUIN	6304	130	3160754733	59205289	0.0187314	0.0195159	118.083	11.9174
	canon	1060	3	HERVIP	5452	114	3160754733	59205289	0.0187314	0.0191457	102.123	11.8765
	noncanon	4365	16	HML3	4123	89	3160754733	59205289	0.0187314	0.0178633	77.2295	11.7705
	canon	5603	X	HERVH	5833	121	3160754733	59205289	0.0187314	0.0196759	109.26	11.7399
	noncanon	1850	5	HERV9	7649	155	3160754733	59205289	0.0187314	0.0200969	143.276	11.7237
	noncanon	3822	12	HERVIP	4608	98	3160754733	59205289	0.0187314	0.0187938	86.3142	11.6858
	noncanon	2806	8	HML3	6002	124	3160754733	59205289	0.0187314	0.0201001	112.426	11.5743
	canon	5740	X	LTR46	5150	108	3160754733	59205289	0.0187314	0.0197053	96.4666	11.5334
	noncanon	1901	5	HERVE	5846	121	3160754733	59205289	0.0187314	0.0202015	109.504	11.4964
	noncanon	1446	4	HML6	5581	116	3160754733	59205289	0.0187314	0.0201543	104.54	11.4602
	noncanon	3432	11	HERVH	6759	138	3160754733	59205289	0.0187314	0.0206366	126.605	11.3946
	canon	3812	12	HERVH	5800	120	3160754733	59205289	0.0187314	0.02048	108.642	11.358
	noncanon	4337	16	HERVH	8151	164	3160754733	59205289	0.0187314	0.0207147	152.679	11.3205
	canon	3968	13	HERVH	5857	121	3160754733	59205289	0.0187314	0.0206473	109.71	11.2903
	canon	5585	X	HERVE	8477	170	3160754733	59205289	0.0187314	0.0208219	158.786	11.2141
	noncanon	2643	7	HARLEQUIN	6130	126	3160754733	59205289	0.0187314	0.0209657	114.823	11.1767
	canon	6068	1	HERV9	6461	132	3160754733	59205289	0.0187314	0.0214178	121.023	10.9766
	noncanon	2249	6	HML5	2419	56	3160754733	59205289	0.0187314	0.0162876	45.3112	10.6888
	noncanon	3503	11	HERV1	7500	151	3160754733	59205289	0.0187314	0.0221593	140.485	10.5147
	canon	5473	X	HERVIP	8842	176	3160754733	59205289	0.0187314	0.0219428	165.623	10.3772
	canon	5330	X	HERVH	5541	114	3160754733	59205289	0.0187314	0.0229739	103.791	10.2094
	noncanon	3914	12	HERVH	2820	63	3160754733	59205289	0.0187314	0.0197972	52.8225	10.1775
	noncanon	2640	7	HML1	1118	31	3160754733	59205289	0.0187314	0.00846248	20.9417	10.0583
	canon	5738	X	LTR46	5124	106	3160754733	59205289	0.0187314	0.0233595	95.9796	10.0204
	canon	4710	19	HERVT	5394	111	3160754733	59205289	0.0187314	0.0235353	101.037	9.96295
	noncanon	5723	X	HML6	5662	116	3160754733	59205289	0.0187314	0.0235845	106.057	9.94294
	noncanon	4315	15	HERVW	6570	133	3160754733	59205289	0.0187314	0.0234518	123.065	9.93485
	canon	1988	5	HERVADP	8337	166	3160754733	59205289	0.0187314	0.0229421	156.163	9.83651
	canon	4762	19	HML10	5457	112	3160754733	59205289	0.0187314	0.0239595	102.217	9.78287
	canon	6193	1	HERVE	6314	128	3160754733	59205289	0.0187314	0.0239279	118.27	9.73008
	noncanon	2428	7	HERVFB	6321	128	3160754733	59205289	0.0187314	0.0241904	118.401	9.59896
	noncanon	3511	11	HERVL	10327	203	3160754733	59205289	0.0187314	0.0223032	193.439	9.56107
	noncanon	1335	4	HERVH	5523	113	3160754733	59205289	0.0187314	0.0245028	103.453	9.5466
	canon	4634	19	HERVH	8834	175	3160754733	59205289	0.0187314	0.0231403	165.473	9.52701
	noncanon	5445	X	HERVH	3289	71	3160754733	59205289	0.0187314	0.0238408	61.6075	9.3925
	noncanon	2895	8	HERVL	6440	130	3160754733	59205289	0.0187314	0.0246019	120.63	9.36993
	noncanon	6225	1	HERVL	5270	108	3160754733	59205289	0.0187314	0.0251622	98.7144	9.28564
	noncanon	3648	11	HUERSP3	7686	153	3160754733	59205289	0.0187314	0.0245377	143.969	9.03064
	noncanon	3783	12	HERVH	3156	68	3160754733	59205289	0.0187314	0.0255233	59.1162	8.88377
	canon	5339	X	HML8	7000	140	3160754733	59205289	0.0187314	0.0252192	131.12	8.88036
	canon	1178	3	HERV9	5622	114	3160754733	59205289	0.0187314	0.0264202	105.308	8.6922
	canon	2879	8	HERVH	6319	127	3160754733	59205289	0.0187314	0.0261152	118.364	8.63643
	noncanon	5474	X	HML3	12249	238	3160754733	59205289	0.0187314	0.0222288	229.441	8.55936
	noncanon	1518	4	HERVL	12680	246	3160754733	59205289	0.0187314	0.0220406	237.514	8.48614
	canon	2434	7	HERVH	5848	118	3160754733	59205289	0.0187314	0.026795	109.541	8.45891
	noncanon	576	2	HERVH	8572	169	3160754733	59205289	0.0187314	0.0248123	160.565	8.43464
	canon	4792	19	LTR46	4036	84	3160754733	59205289	0.0187314	0.0277633	75.5998	8.40016
	canon	3401	11	HERVH	6294	126	3160754733	59205289	0.0187314	0.0271778	117.895	8.10471
	canon	3636	11	HERVL	5179	105	3160754733	59205289	0.0187314	0.0283499	97.0098	7.9902
	canon	6188	1	HERVH	5981	120	3160754733	59205289	0.0187314	0.027723	112.032	7.96763
	noncanon	4090	14	HERVH	13351	258	3160754733	59205289	0.0187314	0.022095	250.083	7.91738
	canon	5862	1	HERVL	6527	130	3160754733	59205289	0.0187314	0.0276543	122.26	7.7403
	canon	5644	X	HERVH	6423	128	3160754733	59205289	0.0187314	0.0278529	120.312	7.68836
	canon	4560	18	HERVH	4717	96	3160754733	59205289	0.0187314	0.0296132	88.3559	7.64409
	noncanon	1899	5	HERVE	2213	49	3160754733	59205289	0.0187314	0.0296791	41.4525	7.54746
	noncanon	2764	8	HERVL	12306	238	3160754733	59205289	0.0187314	0.0230883	230.508	7.49167
	canon	5560	X	HERVH	5640	113	3160754733	59205289	0.0187314	0.0293511	105.645	7.35503
	noncanon	5965	1	HML5	3721	77	3160754733	59205289	0.0187314	0.0314794	69.6995	7.30055
	noncanon	5511	X	HML5	2613	56	3160754733	59205289	0.0187314	0.0327903	48.9451	7.05491
	canon	5442	X	HERVH	4751	96	3160754733	59205289	0.0187314	0.0312434	88.9928	7.00723
	noncanon	3832	12	HERVH	6679	132	3160754733	59205289	0.0187314	0.0289808	125.107	6.89313
	canon	2983	8	HERVH	4707	95	3160754733	59205289	0.0187314	0.0317556	88.1686	6.83141
	noncanon	3899	12	HERVL	5672	113	3160754733	59205289	0.0187314	0.0305687	106.244	6.75563
	noncanon	4125	14	HML5	5462	109	3160754733	59205289	0.0187314	0.0310073	102.311	6.68922
	canon	3769	12	HML7	8027	157	3160754733	59205289	0.0187314	0.0277321	150.357	6.64324
	canon	5318	X	HERV9	3597	74	3160754733	59205289	0.0187314	0.0339357	67.3768	6.62324
	noncanon	2175	6	HML5	4132	84	3160754733	59205289	0.0187314	0.0332289	77.3981	6.60195
	noncanon	1645	4	HERVH	5688	113	3160754733	59205289	0.0187314	0.0311534	106.544	6.45593
	noncanon	6229	1	HERVH	11936	230	3160754733	59205289	0.0187314	0.0241918	223.578	6.42228
	noncanon	2377	6	HERVH	6547	129	3160754733	59205289	0.0187314	0.0300431	122.634	6.36567
	noncanon	3204	10	HERV9	7562	148	3160754733	59205289	0.0187314	0.028686	141.647	6.35333
	canon	4707	19	HERVT	8749	170	3160754733	59205289	0.0187314	0.0275282	163.881	6.11918
	noncanon	5901	1	HERV9	4381	88	3160754733	59205289	0.0187314	0.0346543	82.0622	5.93784
	canon	4384	16	HERVH	5400	107	3160754733	59205289	0.0187314	0.0328637	101.149	5.85056
	canon	3586	11	HERVH	6255	123	3160754733	59205289	0.0187314	0.0313824	117.165	5.83524
	canon	6203	1	HERVH	6154	121	3160754733	59205289	0.0187314	0.0317367	115.273	5.7271
	noncanon	4536	18	MER61	6320	124	3160754733	59205289	0.0187314	0.0316309	118.382	5.6177
	canon	1667	4	HML5	6274	123	3160754733	59205289	0.0187314	0.0319353	117.521	5.47934
	noncanon	724	2	HERVH	11619	223	3160754733	59205289	0.0187314	0.0252245	217.64	5.36013
	canon	1764	5	HERVH	6121	120	3160754733	59205289	0.0187314	0.0324335	114.655	5.34524
	noncanon	978	3	HERV9	6924	135	3160754733	59205289	0.0187314	0.0310728	129.696	5.30394
	canon	1061	3	HML8	7519	146	3160754733	59205289	0.0187314	0.0302985	140.841	5.15878
	noncanon	2435	7	HERVH	9875	190	3160754733	59205289	0.0187314	0.0272638	184.972	5.02765
	canon	3599	11	HERVH	9612	185	3160754733	59205289	0.0187314	0.0276345	180.046	4.954
	noncanon	935	3	HERV9	8281	160	3160754733	59205289	0.0187314	0.0294547	155.115	4.88547
	noncanon	1302	4	HERVE	14000	267	3160754733	59205289	0.0187314	0.0235878	262.239	4.76072
	canon	3737	12	HERVH	4231	84	3160754733	59205289	0.0187314	0.0381027	79.2525	4.74754
	noncanon	1536	4	HERV9	7596	147	3160754733	59205289	0.0187314	0.0306916	142.284	4.71646
	noncanon	2090	6	HERVL	7439	144	3160754733	59205289	0.0187314	0.0310203	139.343	4.65729
	noncanon	2681	7	HML3	2692	55	3160754733	59205289	0.0187314	0.0441876	50.4249	4.57513
	canon	3478	11	HML8	7346	142	3160754733	59205289	0.0187314	0.0314735	137.601	4.3993
	noncanon	4475	17	HERVH	8628	166	3160754733	59205289	0.0187314	0.0294273	161.614	4.38568
	canon	4896	21	HERV3	5799	113	3160754733	59205289	0.0187314	0.0346579	108.623	4.37674
	canon	560	2	HERVH	5641	110	3160754733	59205289	0.0187314	0.0350993	105.664	4.3363
	noncanon	2809	8	HML3	4147	82	3160754733	59205289	0.0187314	0.039414	77.679	4.32098
	canon	4885	21	HERVH	6075	118	3160754733	59205289	0.0187314	0.0342699	113.793	4.20688
	noncanon	4803	20	HERVH	6024	117	3160754733	59205289	0.0187314	0.0344504	112.838	4.16218
	noncanon	1712	4	HARLEQUIN	7311	141	3160754733	59205289	0.0187314	0.0319122	136.945	4.0549
	noncanon	466	2	HUERSP3	8541	164	3160754733	59205289	0.0187314	0.0298784	159.985	4.01531
	noncanon	5763	X	HERV9	11691	223	3160754733	59205289	0.0187314	0.0259784	218.989	4.01147
	noncanon	5944	1	HERVH	7689	148	3160754733	59205289	0.0187314	0.0313113	144.026	3.97444
	canon	5934	1	HERVH	5612	109	3160754733	59205289	0.0187314	0.035877	105.12	3.87951
	noncanon	1896	5	HERVH	6413	124	3160754733	59205289	0.0187314	0.033944	120.124	3.87568
	canon	3727	12	HERVH	7962	153	3160754733	59205289	0.0187314	0.0309463	149.139	3.86078
	canon	1885	5	HERV9	3748	74	3160754733	59205289	0.0187314	0.0422206	70.2052	3.7948
	noncanon	2208	6	HARLEQUIN	6156	119	3160754733	59205289	0.0187314	0.0347708	115.31	3.68964
	noncanon	3427	11	HERVW	5252	102	3160754733	59205289	0.0187314	0.0372683	98.3772	3.62281
	noncanon	2064	6	HML3	3493	69	3160754733	59205289	0.0187314	0.0439446	65.4287	3.5713
	canon	6192	1	HERVH	4839	94	3160754733	59205289	0.0187314	0.0389946	90.6411	3.35887
	noncanon	6040	1	HML1	3827	75	3160754733	59205289	0.0187314	0.04303	71.685	3.31502
	noncanon	1090	3	HML3	2392	48	3160754733	59205289	0.0187314	0.0518405	44.8055	3.19455
	canon	3069	9	HERVIP	8533	163	3160754733	59205289	0.0187314	0.0305493	159.835	3.16516
	noncanon	2273	6	HERVE	9388	179	3160754733	59205289	0.0187314	0.0292448	175.85	3.14983
	noncanon	2941	8	HERVH	4799	93	3160754733	59205289	0.0187314	0.0395377	89.8919	3.10812
	noncanon	2807	8	HERVW	9927	189	3160754733	59205289	0.0187314	0.0285512	185.946	3.05362
	canon	1129	3	HERVW	2778	55	3160754733	59205289	0.0187314	0.0498566	52.0358	2.96423
	canon	3658	11	HERVH	8868	169	3160754733	59205289	0.0187314	0.0301902	166.11	2.89015
	noncanon	1313	4	HERVH	8710	166	3160754733	59205289	0.0187314	0.0304694	163.15	2.8497
	noncanon	874	3	HERVH	9298	177	3160754733	59205289	0.0187314	0.0295617	174.164	2.83566
	canon	3566	11	HERVH	6362	122	3160754733	59205289	0.0187314	0.0352265	119.169	2.83098
	noncanon	2319	6	LTR27	17468	330	3160754733	59205289	0.0187314	0.0218976	327.2	2.8003
	noncanon	3786	12	HML3	2734	54	3160754733	59205289	0.0187314	0.050741	51.2116	2.78841
	canon	6224	1	HERVH	5193	100	3160754733	59205289	0.0187314	0.0387252	97.272	2.72796
	noncanon	3690	12	HML5	5518	106	3160754733	59205289	0.0187314	0.0377856	103.36	2.64026
	canon	1665	4	HERVH	5839	112	3160754733	59205289	0.0187314	0.0368403	109.373	2.62749
	canon	2862	8	HERV9	7815	149	3160754733	59205289	0.0187314	0.0322094	146.386	2.61429
	noncanon	2269	6	HERV9	5306	102	3160754733	59205289	0.0187314	0.038496	99.3887	2.61131
	noncanon	5898	1	HERVW	7016	134	3160754733	59205289	0.0187314	0.0338947	131.419	2.58066
	canon	3215	10	HERVH	5629	108	3160754733	59205289	0.0187314	0.0375329	105.439	2.56108
	noncanon	3085	9	HERVH	6703	128	3160754733	59205289	0.0187314	0.0347337	125.556	2.44358
	noncanon	6109	1	HERVIP	8092	154	3160754733	59205289	0.0187314	0.0318084	151.574	2.4257
	canon	711	2	HERVH	4574	88	3160754733	59205289	0.0187314	0.0415588	85.6773	2.32268
	canon	6239	1	HML7	2604	51	3160754733	59205289	0.0187314	0.0535312	48.7765	2.22349
	noncanon	1242	3	HML3	2393	47	3160754733	59205289	0.0187314	0.0556401	44.8242	2.17581
	noncanon	6116	1	LTR39	17991	339	3160754733	59205289	0.0187314	0.0217372	336.996	2.00379
	noncanon	2070	6	HERV9	6949	132	3160754733	59205289	0.0187314	0.0345789	130.164	1.83566
	canon	6219	1	HEPSI3	8926	169	3160754733	59205289	0.0187314	0.0306628	167.196	1.80373
	noncanon	4882	21	HERVW	8019	152	3160754733	59205289	0.0187314	0.0322989	150.207	1.79309
	canon	6268	22	HERVIP	6738	128	3160754733	59205289	0.0187314	0.0351243	126.212	1.78798
	noncanon	3087	9	HERVH	7970	151	3160754733	59205289	0.0187314	0.0324349	149.289	1.71092
	noncanon	1884	5	HERVH	8344	158	3160754733	59205289	0.0187314	0.0317249	156.295	1.70539
	canon	660	2	HERVH	4449	85	3160754733	59205289	0.0187314	0.0429198	83.3359	1.6641
	canon	5424	X	HERVFRD	6747	128	3160754733	59205289	0.0187314	0.0352053	126.381	1.6194
	noncanon	4352	16	HERVI	7762	147	3160754733	59205289	0.0187314	0.0329034	145.393	1.60705
	noncanon	1811	5	HERVW	6321	120	3160754733	59205289	0.0187314	0.0363431	118.401	1.59896
	noncanon	5691	X	HERVH	7710	146	3160754733	59205289	0.0187314	0.0330233	144.419	1.58108
	canon	1944	5	HERVW	3760	72	3160754733	59205289	0.0187314	0.0465855	70.43	1.57002
	canon	1478	4	HERVL	4721	90	3160754733	59205289	0.0187314	0.0418254	88.4308	1.56917
	noncanon	1084	3	HERVIP	6750	128	3160754733	59205289	0.0187314	0.0352306	126.437	1.5632
	canon	4874	21	HERVW	7766	147	3160754733	59205289	0.0187314	0.0329303	145.468	1.53213
	noncanon	5667	X	HERVW	8837	167	3160754733	59205289	0.0187314	0.0309453	165.529	1.47082
	canon	2439	7	HERVH	5956	113	3160754733	59205289	0.0187314	0.0375091	111.564	1.43592
	noncanon	3510	11	HARLEQUIN	7775	147	3160754733	59205289	0.0187314	0.0329863	145.636	1.36354
	canon	1419	4	HERVH	5967	113	3160754733	59205289	0.0187314	0.0376026	111.77	1.22987
	canon	776	2	HERVH	5755	109	3160754733	59205289	0.0187314	0.0382884	107.799	1.20092
	canon	1496	4	HERVH	5595	106	3160754733	59205289	0.0187314	0.0388195	104.802	1.19794
	canon	4769	19	HML3	3621	69	3160754733	59205289	0.0187314	0.0479368	67.8263	1.17368
	canon	5335	X	PABL	2558	49	3160754733	59205289	0.0187314	0.0567381	47.9149	1.08514
	canon	2914	8	HERVH	5922	112	3160754733	59205289	0.0187314	0.0378299	110.927	1.07278
	canon	1160	3	HERVH	6136	116	3160754733	59205289	0.0187314	0.0371826	114.936	1.06427
	noncanon	3110	9	HML3	4749	90	3160754733	59205289	0.0187314	0.0421538	88.9553	1.04469
	canon	1945	5	HERVE	8540	161	3160754733	59205289	0.0187314	0.0316176	159.966	1.03404
	canon	5562	X	HERVL	6992	132	3160754733	59205289	0.0187314	0.0348898	130.97	1.03021
	canon	737	2	HERVH	4804	91	3160754733	59205289	0.0187314	0.0419394	89.9855	1.01446
	noncanon	2337	6	HERVH	9408	177	3160754733	59205289	0.0187314	0.0302057	176.225	0.775204
	canon	812	2	HERVH	7007	132	3160754733	59205289	0.0187314	0.034957	131.251	0.74924
	noncanon	4159	14	HERVL	3593	68	3160754733	59205289	0.0187314	0.0486043	67.3018	0.698162
	noncanon	2370	6	HERVH	9314	175	3160754733	59205289	0.0187314	0.0304046	174.464	0.535953
	noncanon	1251	3	HERVH	11877	223	3160754733	59205289	0.0187314	0.0269423	222.473	0.527434
	noncanon	4349	16	HML10	8517	160	3160754733	59205289	0.0187314	0.0318011	159.535	0.464861
	noncanon	4771	19	HML6	4519	85	3160754733	59205289	0.0187314	0.0436087	84.6471	0.352907
	noncanon	2820	8	HML3	2551	48	3160754733	59205289	0.0187314	0.0580021	47.7837	0.216257
	canon	3699	12	HERVIP	8586	161	3160754733	59205289	0.0187314	0.0317206	160.828	0.172396
	canon	5636	X	HERVH	5814	109	3160754733	59205289	0.0187314	0.0385439	108.904	0.0957732
	noncanon	3286	10	HERV9	6883	129	3160754733	59205289	0.0187314	0.0354351	128.928	0.071931
	noncanon	5422	X	HML1	6139	115	3160754733	59205289	0.0187314	0.0375278	114.992	0.00807564
	noncanon	544	2	HERVH	7214	135	3160754733	59205289	0.0187314	0.0346378	135.128	-0.128155
	noncanon	4130	14	HERVL	9836	184	3160754733	59205289	0.0187314	0.0296712	184.242	-0.241826
	canon	5848	1	HERVIP	9357	175	3160754733	59205289	0.0187314	0.0304223	175.269	-0.269496
	canon	1563	4	HERVW	4830	90	3160754733	59205289	0.0187314	0.0423569	90.4726	-0.472552
	canon	5628	X	HERV9	5798	108	3160754733	59205289	0.0187314	0.0386545	108.605	-0.604525
	noncanon	6180	1	HERV9	5377	100	3160754733	59205289	0.0187314	0.0401317	100.719	-0.718615
	canon	2444	7	HERVH	4577	85	3160754733	59205289	0.0187314	0.0434963	85.7335	-0.733513
	noncanon	4378	16	HML5	6824	127	3160754733	59205289	0.0187314	0.0356146	127.823	-0.822918
	noncanon	3307	10	HERVE	8428	157	3160754733	59205289	0.0187314	0.0320446	157.868	-0.868047
	canon	3043	9	HML8	5387	100	3160754733	59205289	0.0187314	0.0400693	100.906	-0.905929
	noncanon	958	3	HERV9	7258	135	3160754733	59205289	0.0187314	0.0345201	135.952	-0.952335
	noncanon	876	3	HERV9	7801	145	3160754733	59205289	0.0187314	0.0332762	146.123	-1.12347
	noncanon	2353	6	HERV9	8442	157	3160754733	59205289	0.0187314	0.03199	158.13	-1.13029
	noncanon	5983	1	HERV9	7215	134	3160754733	59205289	0.0187314	0.0345938	135.147	-1.14689
	canon	1882	5	HERVH	6095	113	3160754733	59205289	0.0187314	0.0376238	114.168	-1.16774
	canon	5975	1	HERVH	6204	115	3160754733	59205289	0.0187314	0.0372833	116.209	-1.20946
	canon	1017	3	HERVH	3589	66	3160754733	59205289	0.0187314	0.0489367	67.2269	-1.22691
	noncanon	2399	6	HML3	2575	47	3160754733	59205289	0.0187314	0.0576837	48.2333	-1.2333
	canon	4817	20	HERVH	5839	108	3160754733	59205289	0.0187314	0.0383787	109.373	-1.37251
	canon	738	2	HERVH	8354	155	3160754733	59205289	0.0187314	0.0320968	156.482	-1.48192
	canon	1122	3	HERVH	3497	64	3160754733	59205289	0.0187314	0.0493821	65.5036	-1.50363
	noncanon	4508	18	HERV3	7288	135	3160754733	59205289	0.0187314	0.0343403	136.514	-1.51428
	canon	3743	12	HERVH	4569	84	3160754733	59205289	0.0187314	0.0432359	85.5837	-1.58366
	canon	4651	19	HERVI	9269	172	3160754733	59205289	0.0187314	0.0304539	173.621	-1.62113
	canon	4581	18	MER4	4520	83	3160754733	59205289	0.0187314	0.0434169	84.6658	-1.66582
	noncanon	2390	6	HERVH	2657	48	3160754733	59205289	0.0187314	0.0561579	49.7693	-1.76927
	noncanon	1831	5	HML3	5704	105	3160754733	59205289	0.0187314	0.0386299	106.844	-1.84378
	canon	2388	6	HERVH	5704	105	3160754733	59205289	0.0187314	0.0386299	106.844	-1.84378
	noncanon	2174	6	HERV1	13285	247	3160754733	59205289	0.0187314	0.0254362	248.846	-1.84635
	noncanon	1720	4	HERVH	8327	154	3160754733	59205289	0.0187314	0.0320188	155.976	-1.97618
	noncanon	983	3	HERVE	5663	104	3160754733	59205289	0.0187314	0.0386387	106.076	-2.07579
	noncanon	4129	14	HML5	3421	62	3160754733	59205289	0.0187314	0.0493173	64.08	-2.08004
	noncanon	4332	16	HML3	2250	40	3160754733	59205289	0.0187314	0.0600185	42.1456	-2.1456
	noncanon	4151	14	HML3	7696	142	3160754733	59205289	0.0187314	0.0332185	144.157	-2.15668
	noncanon	500	2	MER41	3376	61	3160754733	59205289	0.0187314	0.0494187	63.2371	-2.23713
	canon	2387	6	HERVH	5672	104	3160754733	59205289	0.0187314	0.0385034	106.244	-2.24437
	canon	3785	12	HERVL	7066	130	3160754733	59205289	0.0187314	0.0345428	132.356	-2.35591
	noncanon	2318	6	HERVH	9202	170	3160754733	59205289	0.0187314	0.03036	172.366	-2.36613
	canon	1461	4	HERVW	7281	134	3160754733	59205289	0.0187314	0.0340293	136.383	-2.38316
	noncanon	2380	6	HERVH	14865	276	3160754733	59205289	0.0187314	0.0239685	278.442	-2.44192
	noncanon	5331	X	HERVH	6805	125	3160754733	59205289	0.0187314	0.0351203	127.467	-2.46702
	canon	5847	1	HERVH	4190	76	3160754733	59205289	0.0187314	0.0443011	78.4845	-2.48447
	noncanon	5494	X	HARLEQUIN	6703	123	3160754733	59205289	0.0187314	0.0353256	125.556	-2.55642
	noncanon	4227	14	HML2	564	8	3160754733	59205289	0.0187314	0.09947	10.5645	-2.5645
	noncanon	3912	12	HML5	568	8	3160754733	59205289	0.0187314	0.0976227	10.6394	-2.63942
	canon	2858	8	PABL	8416	155	3160754733	59205289	0.0187314	0.0315999	157.643	-2.64327
	canon	1138	3	HERVH	6710	123	3160754733	59205289	0.0187314	0.0352268	125.688	-2.68754
	noncanon	2103	6	HML2	9652	178	3160754733	59205289	0.0187314	0.0295071	180.795	-2.79525
	canon	4585	18	HERVH	5755	105	3160754733	59205289	0.0187314	0.0378222	107.799	-2.79908
	canon	1891	5	HERVH	7250	133	3160754733	59205289	0.0187314	0.0338725	135.802	-2.80248
	canon	3025	9	HERVH	6239	114	3160754733	59205289	0.0187314	0.0363475	116.865	-2.86506
	canon	1156	3	HERVADP	6348	116	3160754733	59205289	0.0187314	0.0360182	118.907	-2.90678
	canon	3757	12	HERVI	10040	185	3160754733	59205289	0.0187314	0.0288448	188.063	-3.06303
	noncanon	2292	6	HML3	3907	70	3160754733	59205289	0.0187314	0.0447383	73.1835	-3.18349
	canon	2614	7	HERVH	4444	80	3160754733	59205289	0.0187314	0.0421258	83.2422	-3.24224
	noncanon	2045	5	HERVH	8395	154	3160754733	59205289	0.0187314	0.0313307	157.25	-3.24991
	noncanon	882	3	HERV9	12399	229	3160754733	59205289	0.0187314	0.0259878	232.25	-3.25035
	canon	6187	1	HERVH	5887	107	3160754733	59205289	0.0187314	0.0369974	110.272	-3.27162
	canon	2371	6	HERVH	5738	104	3160754733	59205289	0.0187314	0.0372225	107.481	-3.48064
	noncanon	4614	19	HERVE	5845	106	3160754733	59205289	0.0187314	0.0369049	109.485	-3.4849
	noncanon	3173	9	HERVIP	3336	59	3160754733	59205289	0.0187314	0.0472993	62.4879	-3.48787
	noncanon	465	2	HERVH	7503	137	3160754733	59205289	0.0187314	0.0328378	140.542	-3.54152
	noncanon	3185	10	HML1	1582	26	3160754733	59205289	0.0187314	0.0620654	29.633	-3.63304
	canon	2363	6	HERVW	4095	73	3160754733	59205289	0.0187314	0.0428959	76.705	-3.70499
	noncanon	562	2	HERVH	8635	158	3160754733	59205289	0.0187314	0.0306212	161.745	-3.74544
	canon	4784	19	HERVH	5595	101	3160754733	59205289	0.0187314	0.0372782	104.802	-3.80206
	canon	6144	1	HERVL	8478	155	3160754733	59205289	0.0187314	0.0308451	158.805	-3.80462
	noncanon	1175	3	HML3	2660	46	3160754733	59205289	0.0187314	0.0507972	49.8255	-3.82546
	noncanon	1646	4	HERVH	5979	108	3160754733	59205289	0.0187314	0.0359677	111.995	-3.9949
	noncanon	4558	18	HERVT	8277	151	3160754733	59205289	0.0187314	0.0310232	155.04	-4.03961
	noncanon	549	2	HERVH	7319	133	3160754733	59205289	0.0187314	0.0327611	137.095	-4.09495
	canon	1914	5	HERVH	4654	83	3160754733	59205289	0.0187314	0.0397986	87.1758	-4.17583
	canon	3042	9	HERVH	8341	152	3160754733	59205289	0.0187314	0.030766	156.238	-4.23842
	canon	5563	X	HERVH	5994	108	3160754733	59205289	0.0187314	0.0355892	112.276	-4.27587
	canon	2454	7	HERVH	4344	77	3160754733	59205289	0.0187314	0.040572	81.3691	-4.3691
	noncanon	2955	8	HERVH	9205	168	3160754733	59205289	0.0187314	0.0292905	172.422	-4.42233
	noncanon	699	2	HERVH48	8247	150	3160754733	59205289	0.0187314	0.0307335	154.478	-4.47767
	noncanon	1767	5	HERVH	9208	168	3160754733	59205289	0.0187314	0.0292471	172.479	-4.47852
	noncanon	676	2	HERVIP	7874	143	3160754733	59205289	0.0187314	0.031362	147.491	-4.49086
	canon	745	2	HML5	4675	83	3160754733	59205289	0.0187314	0.0390069	87.5692	-4.56919
	canon	5493	X	HERVH	5903	106	3160754733	59205289	0.0187314	0.0354365	110.571	-4.57132
	noncanon	5671	X	HERVH	6494	117	3160754733	59205289	0.0187314	0.0339441	121.642	-4.64156
	canon	1852	5	HERVH	5859	105	3160754733	59205289	0.0187314	0.0353021	109.747	-4.74714
	noncanon	2403	6	HERVW	5539	99	3160754733	59205289	0.0187314	0.0361176	103.753	-4.7531
	canon	5654	X	HERVH	4583	81	3160754733	59205289	0.0187314	0.0387623	85.8459	-4.8459
	canon	5637	X	HUERSP2	7682	139	3160754733	59205289	0.0187314	0.031322	143.894	-4.89444
	canon	1999	5	HERVH	2682	45	3160754733	59205289	0.0187314	0.0448735	50.2376	-5.23755
	noncanon	3150	9	HERVH	6526	117	3160754733	59205289	0.0187314	0.033113	122.241	-5.24097
	canon	2446	7	HERVH	5620	100	3160754733	59205289	0.0187314	0.0350813	105.27	-5.27034
	noncanon	5839	1	LTR46	4820	85	3160754733	59205289	0.0187314	0.0371382	90.2852	-5.28524
	canon	3102	9	HEPSI1	8727	158	3160754733	59205289	0.0187314	0.0291329	163.469	-5.46873
	canon	1700	4	HERVW	2110	34	3160754733	59205289	0.0187314	0.0455438	39.5232	-5.52321
	canon	2226	6	HERVH	4459	78	3160754733	59205289	0.0187314	0.0376356	83.5232	-5.52321
	noncanon	3365	10	HML3	5475	97	3160754733	59205289	0.0187314	0.0349343	102.554	-5.55429
	noncanon	3175	9	HERVL	4676	82	3160754733	59205289	0.0187314	0.0368819	87.5879	-5.58792
	canon	2425	7	HERVIP	8520	154	3160754733	59205289	0.0187314	0.0293103	159.591	-5.59133
	noncanon	877	3	HARLEQUIN	8470	153	3160754733	59205289	0.0187314	0.0293195	158.655	-5.65476
	noncanon	3234	10	HML3	4897	86	3160754733	59205289	0.0187314	0.0359979	91.7276	-5.72755
	noncanon	4846	20	HERVH	5912	105	3160754733	59205289	0.0187314	0.0336418	110.74	-5.7399
	noncanon	5659	X	HML3	4578	80	3160754733	59205289	0.0187314	0.0367633	85.7522	-5.75224
	noncanon	6005	1	HERVH	7248	130	3160754733	59205289	0.0187314	0.031092	135.765	-5.76502
	noncanon	3508	11	HML3	7467	134	3160754733	59205289	0.0187314	0.030605	139.867	-5.86719
	canon	801	2	HERVH	6624	118	3160754733	59205289	0.0187314	0.0317415	124.077	-6.07664
	canon	5660	X	HERVH	2994	50	3160754733	59205289	0.0187314	0.0400805	56.0817	-6.08174
	canon	2366	6	HERVH	4597	80	3160754733	59205289	0.0187314	0.0358538	86.1081	-6.10814
	canon	4567	18	HERVH	7747	139	3160754733	59205289	0.0187314	0.0298748	145.112	-6.11198
	noncanon	3874	12	HERV9	7758	139	3160754733	59205289	0.0187314	0.0296072	145.318	-6.31802
	canon	3371	10	HERVL	6210	110	3160754733	59205289	0.0187314	0.0320882	116.322	-6.32185
	noncanon	5909	1	HERVH	10268	186	3160754733	59205289	0.0187314	0.0265012	192.334	-6.33378
	canon	4199	14	HERVL	6324	112	3160754733	59205289	0.0187314	0.031662	118.457	-6.45723
	canon	2295	6	HERVH	5898	104	3160754733	59205289	0.0187314	0.0323743	110.478	-6.47766
	noncanon	941	3	HERVH	3189	53	3160754733	59205289	0.0187314	0.0369105	59.7344	-6.73436
	noncanon	1964	5	HML3	3456	58	3160754733	59205289	0.0187314	0.0364409	64.7356	-6.73564
	canon	6108	1	HERVIP	5808	102	3160754733	59205289	0.0187314	0.031937	108.792	-6.79184
	noncanon	2357	6	ERV1_ARTIODACT	9819	177	3160754733	59205289	0.0187314	0.0264407	183.923	-6.92339
	noncanon	723	2	HERVL	7583	135	3160754733	59205289	0.0187314	0.0288986	142.04	-7.04003
	canon	722	2	MER51	7371	131	3160754733	59205289	0.0187314	0.0291357	138.069	-7.06898
	canon	2396	6	HERVADP	9026	162	3160754733	59205289	0.0187314	0.0271353	169.069	-7.06941
	noncanon	2349	6	HERVH	7641	136	3160754733	59205289	0.0187314	0.0287039	143.126	-7.12645
	noncanon	4827	20	HML3	8238	147	3160754733	59205289	0.0187314	0.0277387	154.309	-7.30909
	noncanon	1179	3	HERVH	9364	168	3160754733	59205289	0.0187314	0.0264179	175.401	-7.40062
	noncanon	2649	7	MER41	5789	101	3160754733	59205289	0.0187314	0.0306727	108.436	-7.43594
	canon	3716	12	HERVH	2854	46	3160754733	59205289	0.0187314	0.0339341	53.4594	-7.45935
	canon	3694	12	HERVH	5737	100	3160754733	59205289	0.0187314	0.0306908	107.462	-7.46191
	canon	5516	X	HERVFRD	6060	106	3160754733	59205289	0.0187314	0.0301488	113.512	-7.51215
	noncanon	2463	7	HML5	2492	39	3160754733	59205289	0.0187314	0.0325048	46.6786	-7.67859
	noncanon	501	2	HERVW	8846	158	3160754733	59205289	0.0187314	0.026601	165.698	-7.69776
	canon	5672	X	HERVH	6660	117	3160754733	59205289	0.0187314	0.0289435	124.751	-7.75097
	canon	3407	11	HML8	4579	78	3160754733	59205289	0.0187314	0.0314405	85.771	-7.77098
	noncanon	4260	15	HERV9	9761	175	3160754733	59205289	0.0187314	0.0255689	182.837	-7.83697
	canon	3957	13	HERVH	5288	91	3160754733	59205289	0.0187314	0.0299169	99.0515	-8.05152
	canon	1130	3	HERVH	6143	107	3160754733	59205289	0.0187314	0.028945	115.067	-8.06685
	noncanon	4628	19	HERV3	3432	56	3160754733	59205289	0.0187314	0.0303906	64.2861	-8.28609
	noncanon	5643	X	HERV9	7441	131	3160754733	59205289	0.0187314	0.0270455	139.38	-8.38018
	canon	2770	8	HEPSI3	9525	170	3160754733	59205289	0.0187314	0.0251268	178.416	-8.41637
	noncanon	2613	7	HERVH	6921	121	3160754733	59205289	0.0187314	0.0270866	129.64	-8.63986
	noncanon	2726	8	HML5	2063	30	3160754733	59205289	0.0187314	0.0251895	38.6428	-8.64283
	noncanon	795	2	HERVH	7510	132	3160754733	59205289	0.0187314	0.0265105	140.673	-8.67264
	noncanon	5803	1	HML3	2281	34	3160754733	59205289	0.0187314	0.0259158	42.7263	-8.72627
	noncanon	815	2	HML3	1268	15	3160754733	59205289	0.0187314	0.0155951	23.7514	-8.75139
	canon	759	2	HERVH	5864	101	3160754733	59205289	0.0187314	0.0275663	109.841	-8.8408
	canon	644	2	HERVW	3462	56	3160754733	59205289	0.0187314	0.0281677	64.848	-8.84803
	noncanon	4695	19	HML2	9337	166	3160754733	59205289	0.0187314	0.0247011	174.895	-8.89487
	noncanon	1749	5	HERVH	8539	151	3160754733	59205289	0.0187314	0.0252474	159.947	-8.94723
	noncanon	1260	3	HML2	9026	160	3160754733	59205289	0.0187314	0.0247119	169.069	-9.06941
	canon	4728	19	HML9	5503	94	3160754733	59205289	0.0187314	0.0272533	103.079	-9.07877
	noncanon	4797	20	HERVW	2786	43	3160754733	59205289	0.0187314	0.0254857	52.1856	-9.18562
	noncanon	3688	12	HERVT	5296	90	3160754733	59205289	0.0187314	0.0270541	99.2014	-9.20137
	canon	6099	1	HERV9	7859	138	3160754733	59205289	0.0187314	0.0253719	147.21	-9.20989
	canon	2315	6	HML7	7967	140	3160754733	59205289	0.0187314	0.0252574	149.233	-9.23288
	canon	6026	1	HERVH	4978	84	3160754733	59205289	0.0187314	0.0270571	93.2448	-9.2448
	canon	6076	1	HERVL	6420	111	3160754733	59205289	0.0187314	0.0262994	120.255	-9.25544
	canon	6189	1	HERVH	5358	91	3160754733	59205289	0.0187314	0.0266219	100.363	-9.36272
	canon	5597	X	HERVL	6858	119	3160754733	59205289	0.0187314	0.0256225	128.46	-9.45978
	noncanon	3375	10	HML1	6225	107	3160754733	59205289	0.0187314	0.0256875	116.603	-9.60282
	noncanon	2065	6	HERVH	7189	125	3160754733	59205289	0.0187314	0.0250552	134.66	-9.65987
	canon	5421	X	HML7	8794	155	3160754733	59205289	0.0187314	0.0239786	164.724	-9.72373
	canon	6182	1	HERVW	2086	29	3160754733	59205289	0.0187314	0.0174148	39.0737	-10.0737
	noncanon	2993	9	HERVH	7374	128	3160754733	59205289	0.0187314	0.0241262	138.125	-10.1252
	canon	4389	16	MER50	6792	117	3160754733	59205289	0.0187314	0.0241824	127.224	-10.2235
	noncanon	5846	1	HERVL	5938	101	3160754733	59205289	0.0187314	0.0244044	111.227	-10.2269
	noncanon	3318	10	HERVH	6741	116	3160754733	59205289	0.0187314	0.0241119	126.268	-10.2682
	noncanon	5448	X	HARLEQUIN	7707	134	3160754733	59205289	0.0187314	0.0235655	144.363	-10.3627
	canon	525	2	HERVH	6106	104	3160754733	59205289	0.0187314	0.0240485	114.374	-10.3738
	noncanon	3594	11	HERVE	13371	240	3160754733	59205289	0.0187314	0.020731	250.457	-10.4572
	canon	1650	4	HEPSI2	6983	120	3160754733	59205289	0.0187314	0.0230061	130.801	-10.8012
	noncanon	2282	6	HERV9	13016	233	3160754733	59205289	0.0187314	0.0205783	243.808	-10.8076
	canon	769	2	HERVH	7945	138	3160754733	59205289	0.0187314	0.0227043	148.821	-10.8208
	canon	2225	6	HERVH	8002	139	3160754733	59205289	0.0187314	0.0225732	149.888	-10.8885
	noncanon	4417	16	HERVH	1970	26	3160754733	59205289	0.0187314	0.0126199	36.9008	-10.9008
	noncanon	5499	X	HERVW	9608	169	3160754733	59205289	0.0187314	0.0218556	179.971	-10.9711
	noncanon	1315	4	HERVE	4056	65	3160754733	59205289	0.0187314	0.0213167	75.9745	-10.9745
	noncanon	1641	4	HML3	2670	39	3160754733	59205289	0.0187314	0.0168833	50.0128	-11.0128
	noncanon	4712	19	HML2	2937	44	3160754733	59205289	0.0187314	0.0181172	55.0141	-11.0141
	noncanon	3101	9	HERVH	5768	97	3160754733	59205289	0.0187314	0.022505	108.043	-11.0426
	canon	1519	4	HERVH	6357	108	3160754733	59205289	0.0187314	0.0225086	119.075	-11.0754
	canon	714	2	HML3	6197	105	3160754733	59205289	0.0187314	0.0224925	116.078	-11.0783
	noncanon	3279	10	HML3	3369	52	3160754733	59205289	0.0187314	0.0193073	63.106	-11.106
	noncanon	5605	X	MER50	9616	169	3160754733	59205289	0.0187314	0.0216517	180.121	-11.1209
	noncanon	3720	12	HERVH	7857	136	3160754733	59205289	0.0187314	0.0221378	147.172	-11.1724
	canon	5294	X	HERVH	5724	96	3160754733	59205289	0.0187314	0.0220767	107.218	-11.2184
	noncanon	3771	12	HML3	10317	182	3160754733	59205289	0.0187314	0.0212192	193.252	-11.2516
	canon	5329	X	HERVH	6743	115	3160754733	59205289	0.0187314	0.0220381	126.306	-11.3057
	noncanon	5884	1	HML3	7011	120	3160754733	59205289	0.0187314	0.0219912	131.326	-11.3257
	noncanon	2294	6	HERVH	7012	120	3160754733	59205289	0.0187314	0.021955	131.344	-11.3444
	noncanon	3149	9	HERVH	7870	136	3160754733	59205289	0.0187314	0.0217205	147.416	-11.4159
	canon	5863	1	HERVH	5684	95	3160754733	59205289	0.0187314	0.0214654	106.469	-11.4691
	noncanon	2957	8	HERVH	8941	156	3160754733	59205289	0.0187314	0.0213719	167.477	-11.4772
	noncanon	2378	6	MER57	14334	257	3160754733	59205289	0.0187314	0.0194651	268.496	-11.4956
	canon	4899	21	HERVW	6007	101	3160754733	59205289	0.0187314	0.0214727	112.519	-11.5194
	noncanon	1294	4	HERVE	6602	112	3160754733	59205289	0.0187314	0.0212977	123.665	-11.6646
	noncanon	6238	1	HML5	4895	80	3160754733	59205289	0.0187314	0.0203221	91.6901	-11.6901
	noncanon	2328	6	HERVH	7355	126	3160754733	59205289	0.0187314	0.0211448	137.769	-11.7693
	canon	3408	11	HUERSP1	15473	278	3160754733	59205289	0.0187314	0.0188093	289.831	-11.8306
	noncanon	726	2	HERVE	2234	30	3160754733	59205289	0.0187314	0.0110039	41.8459	-11.8459
	canon	467	2	HERVH	6187	104	3160754733	59205289	0.0187314	0.0207099	115.891	-11.891
	noncanon	6011	1	THE	9497	166	3160754733	59205289	0.0187314	0.0206333	177.892	-11.8919
	canon	865	3	HERVIP	7580	130	3160754733	59205289	0.0187314	0.0207555	141.984	-11.9838
	noncanon	707	2	HERVH	5715	95	3160754733	59205289	0.0187314	0.0201113	107.05	-12.0498
	noncanon	768	2	HARLEQUIN	6254	105	3160754733	59205289	0.0187314	0.0201835	117.146	-12.146
	noncanon	2083	6	HERVH	8338	144	3160754733	59205289	0.0187314	0.0203893	156.182	-12.1822
	noncanon	3358	10	HERVH	4773	77	3160754733	59205289	0.0187314	0.0182497	89.4049	-12.4049
	noncanon	643	2	HML1	3599	55	3160754733	59205289	0.0187314	0.0156281	67.4142	-12.4142
	noncanon	6120	1	HML6	5684	94	3160754733	59205289	0.0187314	0.0191103	106.469	-12.4691
	canon	1966	5	HERVH	3180	47	3160754733	59205289	0.0187314	0.013657	59.5658	-12.5658
	noncanon	5688	X	HERVH48	4622	74	3160754733	59205289	0.0187314	0.0175509	86.5764	-12.5764
	canon	862	3	HERVH	6014	100	3160754733	59205289	0.0187314	0.0189485	112.651	-12.6505
	canon	4902	21	HERVH	5695	94	3160754733	59205289	0.0187314	0.018643	106.675	-12.6752
	noncanon	1465	4	HML8	3143	46	3160754733	59205289	0.0187314	0.0125583	58.8727	-12.8727
	noncanon	4761	19	HML6	13024	231	3160754733	59205289	0.0187314	0.0185276	243.957	-12.9575
	noncanon	5423	X	HML2	7797	133	3160754733	59205289	0.0187314	0.0189048	146.049	-13.0485
	noncanon	5450	X	HERVL	7907	135	3160754733	59205289	0.0187314	0.0188225	148.109	-13.109
	noncanon	2084	6	HERVFB	8388	144	3160754733	59205289	0.0187314	0.018877	157.119	-13.1188
	noncanon	6025	1	HERVIP	8772	151	3160754733	59205289	0.0187314	0.0186085	164.312	-13.3116
	noncanon	2741	8	HERVE	3541	53	3160754733	59205289	0.0187314	0.0127448	66.3278	-13.3278
	canon	4542	18	HERVIP	8567	147	3160754733	59205289	0.0187314	0.0183365	160.472	-13.4717
	noncanon	1685	4	HML2	9371	162	3160754733	59205289	0.0187314	0.0183155	175.532	-13.5317
	noncanon	2965	8	HERVH	10387	181	3160754733	59205289	0.0187314	0.018261	194.563	-13.5628
	noncanon	3103	9	HERVE	5745	94	3160754733	59205289	0.0187314	0.0165843	107.612	-13.6118
	noncanon	1827	5	HERVH	12632	223	3160754733	59205289	0.0187314	0.0179368	236.615	-13.6148
	canon	710	2	HERVH	7777	132	3160754733	59205289	0.0187314	0.0178189	145.674	-13.6739
	canon	6275	22	HML1	3138	45	3160754733	59205289	0.0187314	0.0099897	58.7791	-13.7791
	noncanon	4812	20	HERVH	8110	138	3160754733	59205289	0.0187314	0.0175254	151.911	-13.9115
	canon	3240	10	HML3	5285	85	3160754733	59205289	0.0187314	0.0151234	98.9953	-13.9953
	noncanon	3919	12	HERV9	4753	75	3160754733	59205289	0.0187314	0.0141143	89.0302	-14.0302
	noncanon	3100	9	HERVE	3853	58	3160754733	59205289	0.0187314	0.0115368	72.172	-14.172
	noncanon	5977	1	HERVL	3802	57	3160754733	59205289	0.0187314	0.0112702	71.2167	-14.2167
	noncanon	5626	X	HERVW	11812	207	3160754733	59205289	0.0187314	0.017335	221.255	-14.255
	noncanon	6070	1	HERV9	2363	30	3160754733	59205289	0.0187314	0.00522707	44.2622	-14.2622
	noncanon	4350	16	HERV35	11280	197	3160754733	59205289	0.0187314	0.0173202	211.29	-14.2899
	noncanon	5709	X	HERVW	7442	125	3160754733	59205289	0.0187314	0.0164054	139.399	-14.3989
	noncanon	2329	6	HERVH	7177	120	3160754733	59205289	0.0187314	0.0161788	134.435	-14.4351
	noncanon	3433	11	HERVFB	1361	11	3160754733	59205289	0.0187314	0.000582956	25.4934	-14.4934
	noncanon	1847	5	HERV9	14763	262	3160754733	59205289	0.0187314	0.016732	276.531	-14.5313
	noncanon	2407	6	HML3	1738	18	3160754733	59205289	0.0187314	0.00180991	32.5551	-14.5551
	noncanon	4506	18	HERVL	4087	62	3160754733	59205289	0.0187314	0.0112954	76.5551	-14.5551
	canon	1448	4	HERV3	4249	65	3160754733	59205289	0.0187314	0.0116488	79.5896	-14.5896
	noncanon	6080	1	HML8	3022	42	3160754733	59205289	0.0187314	0.00752124	56.6062	-14.6062
	noncanon	5449	X	HML2	9538	164	3160754733	59205289	0.0187314	0.0167259	178.66	-14.6599
	noncanon	5959	1	HML2	1167	7	3160754733	59205289	0.0187314	0.000138421	21.8595	-14.8595
	canon	3083	9	HERVH	5919	96	3160754733	59205289	0.0187314	0.0141507	110.871	-14.871
	noncanon	863	3	HERVE	3733	55	3160754733	59205289	0.0187314	0.00940096	69.9242	-14.9242
	canon	5634	X	HERVL	5027	79	3160754733	59205289	0.0187314	0.012128	94.1626	-15.1626
	noncanon	5438	X	HERVL	16666	297	3160754733	59205289	0.0187314	0.0159356	312.177	-15.1771
	noncanon	1098	3	HERVE	5670	91	3160754733	59205289	0.0187314	0.0131325	106.207	-15.2069
	noncanon	4391	16	HERV9	1933	21	3160754733	59205289	0.0187314	0.00189508	36.2078	-15.2078
	canon	5521	X	HERVW	3750	55	3160754733	59205289	0.0187314	0.00876775	70.2427	-15.2427
	canon	470	2	HERVH	4446	68	3160754733	59205289	0.0187314	0.0106177	83.2797	-15.2797
	noncanon	3651	11	HERVH	1831	19	3160754733	59205289	0.0187314	0.00145817	34.2972	-15.2972
	canon	4801	20	HERVIP	9147	156	3160754733	59205289	0.0187314	0.0156594	171.336	-15.3359
	noncanon	524	2	HERVH	8614	146	3160754733	59205289	0.0187314	0.015431	161.352	-15.3521
	canon	2359	6	HERVH48	4666	72	3160754733	59205289	0.0187314	0.0108789	87.4006	-15.4006
	noncanon	1528	4	HML3	18817	337	3160754733	59205289	0.0187314	0.0154343	352.468	-15.4683
	noncanon	1658	4	HML3	3603	52	3160754733	59205289	0.0187314	0.00779462	67.4892	-15.4892
	canon	5587	X	PABL	8782	149	3160754733	59205289	0.0187314	0.0152821	164.499	-15.499
	noncanon	1108	3	HERVIP	6819	112	3160754733	59205289	0.0187314	0.0135683	127.729	-15.7293
	noncanon	3233	10	HML3	5382	85	3160754733	59205289	0.0187314	0.0114765	100.812	-15.8123
	noncanon	4442	17	HERVH	9173	156	3160754733	59205289	0.0187314	0.0149696	171.823	-15.8229
	canon	5719	X	HERVW	2562	32	3160754733	59205289	0.0187314	0.0032778	47.9898	-15.9898
	canon	6215	1	HERVH	4328	65	3160754733	59205289	0.0187314	0.00873933	81.0694	-16.0694
	noncanon	5669	X	PRIMA41	10788	186	3160754733	59205289	0.0187314	0.0151049	202.074	-16.0741
	noncanon	4190	14	HML5	8549	144	3160754733	59205289	0.0187314	0.0142211	160.135	-16.1345
	noncanon	713	2	HML3	4601	70	3160754733	59205289	0.0187314	0.00918435	86.1831	-16.1831
	noncanon	2029	5	HARLEQUIN	7324	121	3160754733	59205289	0.0187314	0.0132664	137.189	-16.1886
	noncanon	1946	5	HERVL32	5243	82	3160754733	59205289	0.0187314	0.0104743	98.2086	-16.2086
	noncanon	2091	6	HERVH	8393	141	3160754733	59205289	0.0187314	0.0140147	157.212	-16.2124
	noncanon	4776	19	HML2	5724	91	3160754733	59205289	0.0187314	0.0112847	107.218	-16.2184
	noncanon	1443	4	HERVH	3055	41	3160754733	59205289	0.0187314	0.00465658	57.2244	-16.2244
	noncanon	4504	18	HERVH	3483	49	3160754733	59205289	0.0187314	0.00602421	65.2414	-16.2414
	canon	2416	7	HERVE	4498	68	3160754733	59205289	0.0187314	0.00881048	84.2537	-16.2537
	canon	1535	4	HERVH	4446	67	3160754733	59205289	0.0187314	0.00863738	83.2797	-16.2797
	canon	4070	14	HERVH	6530	106	3160754733	59205289	0.0187314	0.0122269	122.316	-16.3159
	noncanon	3797	12	HERVE	6373	103	3160754733	59205289	0.0187314	0.0119301	119.375	-16.3751
	canon	3129	9	HEPSI1	8349	140	3160754733	59205289	0.0187314	0.0137237	156.388	-16.3883
	noncanon	3333	10	HERVW	3171	43	3160754733	59205289	0.0187314	0.00477693	59.3972	-16.3972
	canon	4594	19	HERVH	4666	71	3160754733	59205289	0.0187314	0.00892995	87.4006	-16.4006
	noncanon	2953	8	HML3	3653	52	3160754733	59205289	0.0187314	0.00623218	68.4257	-16.4257
	noncanon	814	2	HERV9	13371	234	3160754733	59205289	0.0187314	0.0149748	250.457	-16.4572
	noncanon	2750	8	HARLEQUIN	7128	117	3160754733	59205289	0.0187314	0.0125434	133.517	-16.5173
	noncanon	674	2	HML6	2484	30	3160754733	59205289	0.0187314	0.00239419	46.5287	-16.5287
	canon	5682	X	HERVH	4681	71	3160754733	59205289	0.0187314	0.00846026	87.6816	-16.6816
	canon	3673	11	HERVH	5750	91	3160754733	59205289	0.0187314	0.0104594	107.705	-16.7054
	noncanon	5446	X	HML1	4685	71	3160754733	59205289	0.0187314	0.0083382	87.7565	-16.7565
	noncanon	4839	20	HERVH	6768	110	3160754733	59205289	0.0187314	0.0117361	126.774	-16.774
	canon	2533	7	HERVH	7999	133	3160754733	59205289	0.0187314	0.0128116	149.832	-16.8323
	canon	5651	X	HERVH	4529	68	3160754733	59205289	0.0187314	0.00784839	84.8344	-16.8344
	canon	732	2	HUERSP3	8695	146	3160754733	59205289	0.0187314	0.013234	162.869	-16.8693
	noncanon	838	2	HERVH	4214	62	3160754733	59205289	0.0187314	0.0069192	78.934	-16.934
	canon	2331	6	HERVH	5610	88	3160754733	59205289	0.0187314	0.00958337	105.083	-17.083
	noncanon	4261	15	HERV9	1507	11	3160754733	59205289	0.0187314	0.00011355	28.2282	-17.2282
	canon	1442	4	HML2	5191	80	3160754733	59205289	0.0187314	0.00857461	97.2346	-17.2346
	noncanon	4246	15	HML3	7328	120	3160754733	59205289	0.0187314	0.0115618	137.264	-17.2635
	canon	5539	X	MER52	5572	87	3160754733	59205289	0.0187314	0.00904284	104.371	-17.3712
	canon	5874	1	HERVIP	8991	151	3160754733	59205289	0.0187314	0.012653	168.414	-17.4138
	noncanon	4650	19	HERVH	3119	41	3160754733	59205289	0.0187314	0.00326646	58.4232	-17.4232
	canon	827	2	HERVL	7017	114	3160754733	59205289	0.0187314	0.0109627	131.438	-17.4381
	noncanon	1096	3	HERVE	3548	49	3160754733	59205289	0.0187314	0.00438836	66.4589	-17.4589
	noncanon	3136	9	HERVL	4189	61	3160754733	59205289	0.0187314	0.00602331	78.4657	-17.4657
	canon	2989	9	HERVH	5741	90	3160754733	59205289	0.0187314	0.00906049	107.537	-17.5368
	canon	2639	7	PABL	3928	56	3160754733	59205289	0.0187314	0.00521624	73.5768	-17.5768
	canon	1653	4	HERVH	6181	98	3160754733	59205289	0.0187314	0.0093618	115.779	-17.7786
	noncanon	3314	10	MER4?	10828	185	3160754733	59205289	0.0187314	0.0129972	202.823	-17.8234
	noncanon	3539	11	HERVE	5436	84	3160754733	59205289	0.0187314	0.00808926	101.824	-17.8238
	noncanon	6171	1	HML2	8967	150	3160754733	59205289	0.0187314	0.0118958	167.964	-17.9643
	canon	3109	9	HERVH	5765	90	3160754733	59205289	0.0187314	0.00840223	107.986	-17.9864
	canon	4225	14	HML1	3738	52	3160754733	59205289	0.0187314	0.00416574	70.0179	-18.0179
	canon	2405	6	HUERSP2	8011	132	3160754733	59205289	0.0187314	0.0110399	150.057	-18.0571
	noncanon	1643	4	HERVADP	2513	29	3160754733	59205289	0.0187314	0.00124253	47.072	-18.072
	noncanon	1347	4	HERVH	7052	114	3160754733	59205289	0.0187314	0.0100191	132.094	-18.0937
	canon	4166	14	HERVH	4547	67	3160754733	59205289	0.0187314	0.00582672	85.1716	-18.1716
	noncanon	2344	6	HML1	6896	111	3160754733	59205289	0.0187314	0.00972133	129.172	-18.1716
	noncanon	3811	12	HERVH	8875	148	3160754733	59205289	0.0187314	0.0114668	166.241	-18.241
	canon	2350	6	HERVL	6270	99	3160754733	59205289	0.0187314	0.00849785	117.446	-18.4457
	noncanon	5510	X	HERVE	8676	144	3160754733	59205289	0.0187314	0.0109635	162.513	-18.5134
	noncanon	4217	14	HERVH	8249	136	3160754733	59205289	0.0187314	0.010618	154.515	-18.5151
	noncanon	6035	1	LTR19	5797	90	3160754733	59205289	0.0187314	0.00757966	108.586	-18.5858
	noncanon	3291	10	HERVE	7133	115	3160754733	59205289	0.0187314	0.00937548	133.611	-18.6109
	noncanon	5498	X	HERVH48	7934	130	3160754733	59205289	0.0187314	0.0102028	148.615	-18.6147
	noncanon	4045	13	HERVH	7194	116	3160754733	59205289	0.0187314	0.0092484	134.754	-18.7535
	noncanon	568	2	HERVE	3566	48	3160754733	59205289	0.0187314	0.00292432	66.7961	-18.7961
	canon	3247	10	HERVL	6824	109	3160754733	59205289	0.0187314	0.00871076	127.823	-18.8229
	canon	5668	X	HERVH	5547	85	3160754733	59205289	0.0187314	0.00673292	103.903	-18.9029
	noncanon	6128	1	HERVE	8434	139	3160754733	59205289	0.0187314	0.0101627	157.98	-18.9804
	canon	5641	X	HERVH	5929	92	3160754733	59205289	0.0187314	0.00714124	111.058	-19.0583
	noncanon	4752	19	HERVE	2726	32	3160754733	59205289	0.0187314	0.00108691	51.0617	-19.0617
	canon	5838	1	HERVH	4221	60	3160754733	59205289	0.0187314	0.0040314	79.0651	-19.0651
	canon	6118	1	HERVH	5562	85	3160754733	59205289	0.0187314	0.0063896	104.184	-19.1839
	canon	6251	1	HERVH48	5669	87	3160754733	59205289	0.0187314	0.00655947	106.188	-19.1882
	noncanon	4235	14	HERV3	9357	156	3160754733	59205289	0.0187314	0.010498	175.269	-19.2695
	noncanon	1494	4	HERVH	6850	109	3160754733	59205289	0.0187314	0.00809093	128.31	-19.3099
	canon	1959	5	HERVH	5571	85	3160754733	59205289	0.0187314	0.00619019	104.353	-19.3525
	noncanon	4347	16	HERVL	8780	145	3160754733	59205289	0.0187314	0.00983983	164.461	-19.4615
	noncanon	1488	4	HML3	3228	41	3160754733	59205289	0.0187314	0.0017159	60.4649	-19.4649
	canon	5600	X	HERVFC	7661	124	3160754733	59205289	0.0187314	0.00877033	143.501	-19.5011
	canon	566	2	HERVH	4888	72	3160754733	59205289	0.0187314	0.00476255	91.559	-19.559
	noncanon	3844	12	HERV30	5911	91	3160754733	59205289	0.0187314	0.00626968	110.721	-19.7212
	canon	4257	15	HERVH	5595	85	3160754733	59205289	0.0187314	0.00568211	104.802	-19.8021
	canon	3430	11	HERVH	5864	90	3160754733	59205289	0.0187314	0.00605429	109.841	-19.8408
	noncanon	2413	7	HERVE	5175	77	3160754733	59205289	0.0187314	0.00484229	96.9349	-19.9349
	canon	3162	9	HERVH	5123	76	3160754733	59205289	0.0187314	0.00472624	95.9608	-19.9608
	noncanon	2582	7	HML2	4272	60	3160754733	59205289	0.0187314	0.00317532	80.0204	-20.0204
	canon	3363	10	HERVH	5874	90	3160754733	59205289	0.0187314	0.00584858	110.028	-20.0281
	noncanon	5523	X	LTR19	5874	90	3160754733	59205289	0.0187314	0.00584858	110.028	-20.0281
	canon	6166	1	HERVH	5879	90	3160754733	59205289	0.0187314	0.00574779	110.122	-20.1218
	canon	4608	19	HERVIP	9296	154	3160754733	59205289	0.0187314	0.00944187	174.127	-20.1269
	canon	4163	14	HERVW	3158	39	3160754733	59205289	0.0187314	0.00120749	59.1537	-20.1537
	canon	6067	1	HML3	5829	89	3160754733	59205289	0.0187314	0.00560072	109.185	-20.1852
	noncanon	2986	8	HML9	3216	40	3160754733	59205289	0.0187314	0.00124861	60.2401	-20.2401
	noncanon	1280	3	HUERSP3	5463	82	3160754733	59205289	0.0187314	0.00488055	102.33	-20.3295
	noncanon	1981	5	HERVH	7229	115	3160754733	59205289	0.0187314	0.00718919	135.409	-20.4091
	canon	3244	10	HML6	7823	126	3160754733	59205289	0.0187314	0.00768594	146.536	-20.5356
	canon	3710	12	HERVH	5852	89	3160754733	59205289	0.0187314	0.00516105	109.616	-20.616
	canon	2204	6	HERV9	7085	112	3160754733	59205289	0.0187314	0.00667546	132.712	-20.7118
	canon	5903	1	HML1	5328	79	3160754733	59205289	0.0187314	0.00419095	99.8008	-20.8008
	noncanon	3698	12	HERVH	4851	70	3160754733	59205289	0.0187314	0.00339175	90.8659	-20.8659
	noncanon	901	3	MER51	6827	107	3160754733	59205289	0.0187314	0.00618024	127.879	-20.8791
	noncanon	679	2	HML2	7788	125	3160754733	59205289	0.0187314	0.00726028	145.88	-20.88
	canon	2356	6	HERVH	7737	124	3160754733	59205289	0.0187314	0.00715805	144.925	-20.9247
	noncanon	1894	5	HERVIP	6884	108	3160754733	59205289	0.0187314	0.00617594	128.947	-20.9468
	canon	5565	X	HML1	6407	99	3160754733	59205289	0.0187314	0.0055061	120.012	-21.0119
	canon	5415	X	HEPSI1	10307	172	3160754733	59205289	0.0187314	0.00909509	193.064	-21.0643
	canon	2620	7	HERVH	6201	95	3160754733	59205289	0.0187314	0.00508822	116.153	-21.1533
	canon	2910	8	HERVH	5938	90	3160754733	59205289	0.0187314	0.00465869	111.227	-21.2269
	canon	5506	X	HERVS	6636	103	3160754733	59205289	0.0187314	0.00549713	124.301	-21.3014
	noncanon	3568	11	HERVH	6159	94	3160754733	59205289	0.0187314	0.00481986	115.367	-21.3666
	canon	5411	X	HERVW	4293	59	3160754733	59205289	0.0187314	0.00213117	80.4138	-21.4138
	noncanon	4139	14	HERVH	6281	96	3160754733	59205289	0.0187314	0.00470342	117.652	-21.6518
	canon	4570	18	HERVH	5486	81	3160754733	59205289	0.0187314	0.00355273	102.76	-21.7603
	noncanon	4768	19	HML2	9279	152	3160754733	59205289	0.0187314	0.00760787	173.808	-21.8084
	canon	5509	X	HERVL	6722	104	3160754733	59205289	0.0187314	0.00499886	125.912	-21.9123
	noncanon	940	3	HERVH	7690	122	3160754733	59205289	0.0187314	0.00594074	144.044	-22.0443
	noncanon	3195	10	HERVE	8867	144	3160754733	59205289	0.0187314	0.00699032	166.091	-22.0911
	noncanon	3275	10	HARLEQUIN	7215	113	3160754733	59205289	0.0187314	0.00533825	135.147	-22.1469
	noncanon	5464	X	HERV9	2144	18	3160754733	59205289	0.0187314	3.73236e-05	40.1601	-22.1601
	canon	2272	6	HML5	7646	121	3160754733	59205289	0.0187314	0.00572519	143.22	-22.2201
	noncanon	906	3	HERVH	9037	147	3160754733	59205289	0.0187314	0.00695004	169.275	-22.2755
	canon	3520	11	HERVH	6637	102	3160754733	59205289	0.0187314	0.00452404	124.32	-22.3202
	canon	4543	18	HERVH	6373	97	3160754733	59205289	0.0187314	0.00416403	119.375	-22.3751
	noncanon	3523	11	HERVE	4778	67	3160754733	59205289	0.0187314	0.00209247	89.4985	-22.4985
	canon	2848	8	HERVH48	7235	113	3160754733	59205289	0.0187314	0.00501267	135.522	-22.5215
	noncanon	4766	19	HERVIP	3500	43	3160754733	59205289	0.0187314	0.000680118	65.5598	-22.5598
	canon	5955	1	HERVL	5056	72	3160754733	59205289	0.0187314	0.00230404	94.7058	-22.7058
	canon	4263	15	HML9	8315	133	3160754733	59205289	0.0187314	0.00587253	155.751	-22.7514
	noncanon	4739	19	HML3	2176	18	3160754733	59205289	0.0187314	2.6636e-05	40.7595	-22.7595
	noncanon	3300	10	HUERSP2	3244	38	3160754733	59205289	0.0187314	0.000434277	60.7646	-22.7646
	noncanon	3297	10	HERVH	8538	137	3160754733	59205289	0.0187314	0.00591003	159.928	-22.9285
	noncanon	6218	1	HERVH	8113	129	3160754733	59205289	0.0187314	0.00548961	151.968	-22.9677
	canon	3206	10	HERVW	4377	59	3160754733	59205289	0.0187314	0.00137619	81.9872	-22.9872
	noncanon	4525	18	HERVH	6940	107	3160754733	59205289	0.0187314	0.00428389	129.996	-22.9958
	noncanon	2375	6	HERVL	4541	62	3160754733	59205289	0.0187314	0.00151776	85.0592	-23.0592
	noncanon	1454	4	HML6	20133	354	3160754733	59205289	0.0187314	0.0102339	377.119	-23.1188
	noncanon	1994	5	HERVH	6951	107	3160754733	59205289	0.0187314	0.00412733	130.202	-23.2018
	canon	6265	22	HML8	2255	19	3160754733	59205289	0.0187314	2.56013e-05	42.2393	-23.2393
	noncanon	2113	6	HML3	3644	45	3160754733	59205289	0.0187314	0.000609642	68.2571	-23.2571
	noncanon	5836	1	HML9	5833	86	3160754733	59205289	0.0187314	0.00285143	109.26	-23.2601
	canon	2400	6	HERVL	5251	75	3160754733	59205289	0.0187314	0.00213745	98.3585	-23.3585
	canon	4847	20	HERVH	7178	111	3160754733	59205289	0.0187314	0.0041617	134.454	-23.4538
	noncanon	2703	8	HERVH	6325	95	3160754733	59205289	0.0187314	0.00324598	118.476	-23.476
	canon	5973	1	HERV9	6966	107	3160754733	59205289	0.0187314	0.0039213	130.483	-23.4828
	canon	1474	4	HML6	7937	125	3160754733	59205289	0.0187314	0.00472451	148.671	-23.6709
	canon	4175	14	HERVL	6339	95	3160754733	59205289	0.0187314	0.00307809	118.738	-23.7382
	canon	6196	1	HERVH	5653	82	3160754733	59205289	0.0187314	0.00226283	105.888	-23.8885
	noncanon	4346	16	HERVH	6509	98	3160754733	59205289	0.0187314	0.00312925	121.923	-23.9225
	noncanon	642	2	HARLEQUIN	6939	106	3160754733	59205289	0.0187314	0.00352609	129.977	-23.977
	noncanon	4226	14	HML3	7582	118	3160754733	59205289	0.0187314	0.00411681	142.021	-24.0213
	noncanon	6223	1	HERVH	7426	115	3160754733	59205289	0.0187314	0.00391092	139.099	-24.0992
	noncanon	1947	5	HERV9	10686	176	3160754733	59205289	0.0187314	0.00644033	200.163	-24.1635
	canon	6217	1	HERVH	6202	92	3160754733	59205289	0.0187314	0.00265544	116.172	-24.172
	canon	3093	9	HERVIP	4549	61	3160754733	59205289	0.0187314	0.00105385	85.209	-24.209
	noncanon	5340	X	PRIMA41	13785	234	3160754733	59205289	0.0187314	0.00796696	258.212	-24.212
	noncanon	3388	11	HML1	3328	38	3160754733	59205289	0.0187314	0.000235635	62.338	-24.338
	noncanon	2654	7	HML2	3814	47	3160754733	59205289	0.0187314	0.000461818	71.4415	-24.4415
	noncanon	6022	1	HARLEQUIN	6271	93	3160754733	59205289	0.0187314	0.00254706	117.464	-24.4645
	noncanon	649	2	HERVW	2428	21	3160754733	59205289	0.0187314	2.00299e-05	45.4798	-24.4798
	canon	4742	19	HERVH	5689	82	3160754733	59205289	0.0187314	0.00193516	106.563	-24.5628
	noncanon	5913	1	HERV9	8572	136	3160754733	59205289	0.0187314	0.00457661	160.565	-24.5654
	noncanon	6185	1	HML3	6921	105	3160754733	59205289	0.0187314	0.00305927	129.64	-24.6399
	canon	1729	4	HERV9	5216	73	3160754733	59205289	0.0187314	0.00143983	97.7029	-24.7029
	canon	5981	1	HERVH	5858	85	3160754733	59205289	0.0187314	0.00200902	109.728	-24.7284
	canon	4047	13	HERVL	6394	95	3160754733	59205289	0.0187314	0.00248716	119.768	-24.7684
	noncanon	3400	11	HML6	7943	124	3160754733	59205289	0.0187314	0.00388515	148.783	-24.7833
	noncanon	902	3	HERVH	2766	27	3160754733	59205289	0.0187314	5.06071e-05	51.811	-24.811
	canon	1312	4	HML2	9066	145	3160754733	59205289	0.0187314	0.00477939	169.819	-24.8187
	noncanon	3338	10	MER66	5383	76	3160754733	59205289	0.0187314	0.00153164	100.831	-24.831
	canon	2483	7	HUERSP2	4263	55	3160754733	59205289	0.0187314	0.000651023	79.8519	-24.8519
	canon	4316	15	HERVH	6933	105	3160754733	59205289	0.0187314	0.00292866	129.865	-24.8646
	noncanon	3577	11	HERVW	3358	38	3160754733	59205289	0.0187314	0.000188279	62.9	-24.9
	noncanon	3405	11	MER84	2879	29	3160754733	59205289	0.0187314	6.45792e-05	53.9276	-24.9276
	noncanon	2630	7	HARLEQUIN	8434	133	3160754733	59205289	0.0187314	0.00415828	157.98	-24.9804
	canon	4307	15	HERVH	3794	46	3160754733	59205289	0.0187314	0.000345348	71.0668	-25.0668
	noncanon	826	2	HERVH	6624	99	3160754733	59205289	0.0187314	0.0025223	124.077	-25.0766
	canon	2303	6	HERVH	6413	95	3160754733	59205289	0.0187314	0.00230674	120.124	-25.1243
	noncanon	3308	10	HERVIP	7748	120	3160754733	59205289	0.0187314	0.0034804	145.131	-25.1307
	noncanon	803	2	HERVH	6095	89	3160754733	59205289	0.0187314	0.00200207	114.168	-25.1677
	noncanon	1045	3	HML2	9139	146	3160754733	59205289	0.0187314	0.00456394	171.186	-25.1861
	canon	2585	7	HERVH	6310	93	3160754733	59205289	0.0187314	0.00217784	118.195	-25.195
	noncanon	6248	1	HML3	5513	78	3160754733	59205289	0.0187314	0.00145985	103.266	-25.2661
	canon	6083	1	HERV9	7385	113	3160754733	59205289	0.0187314	0.00304161	138.331	-25.3312
	canon	4006	13	HERVH	6158	90	3160754733	59205289	0.0187314	0.00196846	115.348	-25.3478
	noncanon	3097	9	HERVIP	7710	119	3160754733	59205289	0.0187314	0.00326263	144.419	-25.4189
	noncanon	1288	4	HERVE	3280	36	3160754733	59205289	0.0187314	0.000122942	61.4389	-25.4389
	noncanon	4052	13	HERV9	2855	28	3160754733	59205289	0.0187314	4.28079e-05	53.4781	-25.4781
	noncanon	6205	1	HML5	7502	115	3160754733	59205289	0.0187314	0.00302432	140.523	-25.5228
	noncanon	1458	4	HARLEQUIN	7510	115	3160754733	59205289	0.0187314	0.00294151	140.673	-25.6726
	noncanon	569	2	HERVH	7833	121	3160754733	59205289	0.0187314	0.00317564	146.723	-25.7229
	canon	3120	9	HERVH	4368	56	3160754733	59205289	0.0187314	0.000505324	81.8187	-25.8187
	noncanon	5447	X	HERVIP	5436	76	3160754733	59205289	0.0187314	0.00119005	101.824	-25.8238
	canon	3122	9	HERVH	6131	89	3160754733	59205289	0.0187314	0.0017184	114.842	-25.8421
	noncanon	4559	18	HERV9	4320	55	3160754733	59205289	0.0187314	0.000462151	80.9195	-25.9195
	canon	924	3	HERVW	3734	44	3160754733	59205289	0.0187314	0.000214326	69.943	-25.943
	noncanon	1561	4	HML7	4975	67	3160754733	59205289	0.0187314	0.000770113	93.1886	-26.1886
	noncanon	1797	5	HERV9	11969	198	3160754733	59205289	0.0187314	0.00563867	224.196	-26.1959
	canon	1826	5	HERVIP	5884	84	3160754733	59205289	0.0187314	0.00137829	110.215	-26.2154
	canon	3738	12	HERVH	6153	89	3160754733	59205289	0.0187314	0.00156282	115.254	-26.2542
	canon	4798	20	HERVH	7435	113	3160754733	59205289	0.0187314	0.00254783	139.268	-26.2678
	canon	1249	3	HERVH	7178	108	3160754733	59205289	0.0187314	0.0022542	134.454	-26.4538
	noncanon	530	2	HML2	6114	88	3160754733	59205289	0.0187314	0.00142957	114.524	-26.5236
	canon	3627	11	HERVH	5637	79	3160754733	59205289	0.0187314	0.00107869	105.589	-26.5888
	noncanon	3820	12	HUERSP2	8574	134	3160754733	59205289	0.0187314	0.00321873	160.603	-26.6028
	noncanon	4104	14	HERVH	4891	65	3160754733	59205289	0.0187314	0.00062302	91.6152	-26.6152
	canon	1539	4	HERV9	10658	173	3160754733	59205289	0.0187314	0.00459001	199.639	-26.639
	noncanon	4818	20	HARLEQUIN	6121	88	3160754733	59205289	0.0187314	0.00138601	114.655	-26.6548
	noncanon	3777	12	HML5	2333	17	3160754733	59205289	0.0187314	1.96153e-06	43.7003	-26.7003
	canon	3892	12	HERVH	7031	105	3160754733	59205289	0.0187314	0.0020266	131.7	-26.7003
	canon	4327	15	HERVH	5912	84	3160754733	59205289	0.0187314	0.00121288	110.74	-26.7399
	noncanon	1566	4	HERV9	6500	95	3160754733	59205289	0.0187314	0.00161654	121.754	-26.754
	canon	3601	11	HERVH	6448	94	3160754733	59205289	0.0187314	0.00156923	120.78	-26.7799
	canon	5882	1	HERVH	5865	83	3160754733	59205289	0.0187314	0.00114277	109.86	-26.8595
	noncanon	749	2	HERVH	6667	98	3160754733	59205289	0.0187314	0.00168386	124.882	-26.8821
	noncanon	2745	8	HERVL	4592	59	3160754733	59205289	0.0187314	0.000407187	86.0145	-27.0145
	noncanon	2839	8	HML1	6464	94	3160754733	59205289	0.0187314	0.00146624	121.08	-27.0796
	canon	5583	X	HERVH	4919	65	3160754733	59205289	0.0187314	0.000533052	92.1396	-27.1396
	noncanon	1542	4	HARLEQUIN	7536	114	3160754733	59205289	0.0187314	0.00217962	141.16	-27.1597
	canon	942	3	HERVH	5996	85	3160754733	59205289	0.0187314	0.00108494	112.313	-27.3133
	noncanon	6034	1	PRIMA4	8241	127	3160754733	59205289	0.0187314	0.00257128	154.365	-27.3653
	noncanon	3693	12	HERVW	2479	19	3160754733	59205289	0.0187314	2.25536e-06	46.4351	-27.4351
	noncanon	3544	11	HERVE	5740	80	3160754733	59205289	0.0187314	0.000877368	107.518	-27.5181
	noncanon	631	2	HML8	6114	87	3160754733	59205289	0.0187314	0.00109347	114.524	-27.5236
	canon	4873	21	HML2	9002	141	3160754733	59205289	0.0187314	0.00294999	168.62	-27.6199
	noncanon	4483	17	HERV9	5272	71	3160754733	59205289	0.0187314	0.000583906	98.7518	-27.7518
	noncanon	4340	16	HML3	4793	62	3160754733	59205289	0.0187314	0.000376371	89.7795	-27.7795
	noncanon	1124	3	HARLEQUIN	7422	111	3160754733	59205289	0.0187314	0.00173472	139.024	-28.0243
	canon	2437	7	HERVADP	9028	141	3160754733	59205289	0.0187314	0.00271832	169.107	-28.1069
	noncanon	5686	X	HERVH	7854	119	3160754733	59205289	0.0187314	0.00197105	147.116	-28.1162
	canon	3005	9	HERVH	6307	90	3160754733	59205289	0.0187314	0.00102742	118.139	-28.1388
	noncanon	1142	3	HERVW	3800	43	3160754733	59205289	0.0187314	8.19675e-05	71.1792	-28.1792
	noncanon	5815	1	HERVFB	5886	82	3160754733	59205289	0.0187314	0.000775917	110.253	-28.2529
	noncanon	5387	X	HML6	2149	12	3160754733	59205289	0.0187314	1.03453e-07	40.2537	-28.2537
	noncanon	3529	11	HERVE	3539	38	3160754733	59205289	0.0187314	4.56556e-05	66.2903	-28.2903
	noncanon	3289	10	HERVL	6690	97	3160754733	59205289	0.0187314	0.00119245	125.313	-28.3129
	canon	3183	10	HML4	9201	144	3160754733	59205289	0.0187314	0.00270745	172.347	-28.3474
	noncanon	1296	4	HERVE	3224	32	3160754733	59205289	0.0187314	1.95291e-05	60.39	-28.39
	canon	1285	4	HERVH	9687	153	3160754733	59205289	0.0187314	0.00294852	181.451	-28.4509
	noncanon	3674	11	HERVH	6166	87	3160754733	59205289	0.0187314	0.000859081	115.498	-28.4977
	noncanon	4065	14	HERVL	8035	122	3160754733	59205289	0.0187314	0.00192318	150.507	-28.5066
	canon	868	3	HERVIP	8304	127	3160754733	59205289	0.0187314	0.00207044	155.545	-28.5454
	noncanon	3728	12	HERVIP	5902	82	3160754733	59205289	0.0187314	0.000717408	110.553	-28.5526
	noncanon	5146	Y	HML3	2486	18	3160754733	59205289	0.0187314	8.40832e-07	46.5662	-28.5662
	noncanon	6092	1	HARLEQUIN	6812	99	3160754733	59205289	0.0187314	0.00117508	127.598	-28.5981
	canon	3411	11	HERVH	6225	88	3160754733	59205289	0.0187314	0.000863347	116.603	-28.6028
	canon	3383	11	HERVH	5639	77	3160754733	59205289	0.0187314	0.000584123	105.626	-28.6262
	noncanon	5645	X	HERVH	10180	162	3160754733	59205289	0.0187314	0.00311619	190.685	-28.6854
	noncanon	946	3	HERVW	4849	62	3160754733	59205289	0.0187314	0.00026947	90.8284	-28.8284
	canon	6176	1	HERVH	5118	67	3160754733	59205289	0.0187314	0.000348537	95.8672	-28.8672
	canon	5580	X	HERVH	5710	78	3160754733	59205289	0.0187314	0.000554778	106.956	-28.9562
	canon	6221	1	HERVH	7798	117	3160754733	59205289	0.0187314	0.0015741	146.067	-29.0673
	canon	5350	X	HERVFA	8655	133	3160754733	59205289	0.0187314	0.00204059	162.12	-29.1201
	canon	5616	X	HML5	6478	92	3160754733	59205289	0.0187314	0.000812559	121.342	-29.3419
	noncanon	5830	1	HML2	5998	83	3160754733	59205289	0.0187314	0.000602116	112.351	-29.3508
	canon	1343	4	HERVH	5575	75	3160754733	59205289	0.0187314	0.000429393	104.427	-29.4274
	noncanon	1961	5	HERV9	6218	87	3160754733	59205289	0.0187314	0.000670712	116.472	-29.4717
	canon	4533	18	HERVH	6273	88	3160754733	59205289	0.0187314	0.000688066	117.502	-29.5019
	canon	2952	8	HERVADP	7611	113	3160754733	59205289	0.0187314	0.00131112	142.565	-29.5645
	noncanon	1537	4	MER57	9266	144	3160754733	59205289	0.0187314	0.00220022	173.565	-29.5649
	noncanon	1295	4	HERVE	3554	37	3160754733	59205289	0.0187314	2.28723e-05	66.5713	-29.5713
	canon	2031	5	HERVS	5957	82	3160754733	59205289	0.0187314	0.00054539	111.583	-29.5828
	noncanon	2756	8	HML3	5851	80	3160754733	59205289	0.0187314	0.000503123	109.597	-29.5973
	noncanon	4884	21	MER50	5799	79	3160754733	59205289	0.0187314	0.000480102	108.623	-29.6233
	canon	471	2	HERVH	4732	59	3160754733	59205289	0.0187314	0.000171577	88.6369	-29.6369
	noncanon	2046	5	HERVH	8632	132	3160754733	59205289	0.0187314	0.00180884	161.689	-29.6892
	noncanon	5584	X	HERVH	7459	110	3160754733	59205289	0.0187314	0.00118907	139.717	-29.7173
	noncanon	5890	1	HERVH	8315	126	3160754733	59205289	0.0187314	0.00161843	155.751	-29.7514
	noncanon	1452	4	HERV3	5652	76	3160754733	59205289	0.0187314	0.000395058	105.87	-29.8697
	noncanon	1290	4	MLT	6561	93	3160754733	59205289	0.0187314	0.000730547	122.897	-29.8966
	canon	1731	4	HML3	4907	62	3160754733	59205289	0.0187314	0.000188968	91.9149	-29.9149
	noncanon	3895	12	HML1	6406	90	3160754733	59205289	0.0187314	0.000648369	119.993	-29.9932
	canon	3346	10	HERVH	8063	121	3160754733	59205289	0.0187314	0.00139779	151.031	-30.0311
	noncanon	2014	5	HERVH	6248	87	3160754733	59205289	0.0187314	0.000579824	117.034	-30.0336
	canon	3180	10	HERVH	6356	89	3160754733	59205289	0.0187314	0.000617159	119.057	-30.0566
	noncanon	1849	5	HML3	4274	50	3160754733	59205289	0.0187314	7.48716e-05	80.0579	-30.0579
	noncanon	5620	X	HERVH	3370	33	3160754733	59205289	0.0187314	9.90604e-06	63.1247	-30.1247
	canon	3602	11	HERVH	5512	73	3160754733	59205289	0.0187314	0.000308546	103.247	-30.2474
	canon	2568	7	HERVFRD	10589	168	3160754733	59205289	0.0187314	0.00256052	198.347	-30.3466
	noncanon	3804	12	HML4	6161	85	3160754733	59205289	0.0187314	0.000489235	115.404	-30.404
	canon	829	2	HERVH	6162	85	3160754733	59205289	0.0187314	0.000486786	115.423	-30.4227
	canon	5906	1	HERVS	6163	85	3160754733	59205289	0.0187314	0.000484348	115.441	-30.4415
	noncanon	3406	11	HERVH	3067	27	3160754733	59205289	0.0187314	2.8124e-06	57.4491	-30.4491
	noncanon	5917	1	HERVH	9848	154	3160754733	59205289	0.0187314	0.00214371	184.467	-30.4666
	canon	3876	12	HERV9	7446	109	3160754733	59205289	0.0187314	0.000984257	139.474	-30.4738
	noncanon	867	3	HERVIP	10385	164	3160754733	59205289	0.0187314	0.00238563	194.525	-30.5254
	noncanon	5520	X	HML3	5154	66	3160754733	59205289	0.0187314	0.000195271	96.5415	-30.5415
	noncanon	691	2	HML6	7505	110	3160754733	59205289	0.0187314	0.000984741	140.579	-30.579
	canon	4587	18	HERVH	5690	76	3160754733	59205289	0.0187314	0.000321548	106.582	-30.5815
	canon	4447	17	HUERSP2	9536	148	3160754733	59205289	0.0187314	0.00193124	178.622	-30.6224
	noncanon	698	2	HERVW	7671	113	3160754733	59205289	0.0187314	0.00103069	143.688	-30.6884
	canon	1960	5	HERVH	4735	58	3160754733	59205289	0.0187314	0.000111241	88.6931	-30.6931
	canon	3942	13	MER41	4310	50	3160754733	59205289	0.0187314	5.7792e-05	80.7322	-30.7322
	noncanon	3679	12	HARLEQUIN	7728	114	3160754733	59205289	0.0187314	0.00103888	144.756	-30.7561
	noncanon	4785	19	HERVH	5755	77	3160754733	59205289	0.0187314	0.000315801	107.799	-30.7991
	noncanon	2323	6	HERVH	6879	98	3160754733	59205289	0.0187314	0.000671852	128.853	-30.8531
	canon	4057	13	HERVH	6025	82	3160754733	59205289	0.0187314	0.00038482	112.857	-30.8565
	noncanon	3290	10	HERVFB	5392	70	3160754733	59205289	0.0187314	0.000210804	101	-30.9996
	noncanon	2978	8	ERV1_ARTIODACT	3793	40	3160754733	59205289	0.0187314	1.74129e-05	71.0481	-31.0481
	canon	2345	6	HERVH	6844	97	3160754733	59205289	0.0187314	0.000598937	128.198	-31.1975
	canon	6106	1	HERV9	7976	118	3160754733	59205289	0.0187314	0.000988305	149.401	-31.4015
	noncanon	1236	3	HML1	11447	183	3160754733	59205289	0.0187314	0.00252064	214.418	-31.4181
	canon	1975	5	HERVH	5899	79	3160754733	59205289	0.0187314	0.000282273	110.496	-31.4964
	noncanon	2417	7	HERVH	8515	128	3160754733	59205289	0.0187314	0.00118844	159.498	-31.4977
	canon	1639	4	HERVH	5261	67	3160754733	59205289	0.0187314	0.000149596	98.5458	-31.5458
	noncanon	1265	3	HERVH	6863	97	3160754733	59205289	0.0187314	0.000548233	128.553	-31.5534
	noncanon	3780	12	HERVH	8680	131	3160754733	59205289	0.0187314	0.0012343	162.588	-31.5884
	noncanon	4604	19	HERV9	9748	151	3160754733	59205289	0.0187314	0.00169754	182.593	-31.5935
	noncanon	2580	7	HERVH	9861	153	3160754733	59205289	0.0187314	0.00170978	184.71	-31.7101
	canon	1734	4	HERVH	6019	81	3160754733	59205289	0.0187314	0.00028721	112.744	-31.7442
	canon	4623	19	HML1	3086	26	3160754733	59205289	0.0187314	1.07309e-06	57.805	-31.805
	noncanon	3509	11	HARLEQUIN	7363	106	3160754733	59205289	0.0187314	0.000654581	137.919	-31.9191
	canon	4834	20	HERVH	6404	88	3160754733	59205289	0.0187314	0.000360752	119.956	-31.9557
	noncanon	3524	11	HML8	3523	34	3160754733	59205289	0.0187314	4.68688e-06	65.9906	-31.9906
	noncanon	5553	X	HARLEQUIN	9611	148	3160754733	59205289	0.0187314	0.00150446	180.027	-32.0273
	noncanon	1905	5	HERVH	12389	200	3160754733	59205289	0.0187314	0.00266561	232.063	-32.063
	noncanon	5542	X	HERVL	7319	105	3160754733	59205289	0.0187314	0.000610558	137.095	-32.0949
	noncanon	2830	8	HARLEQUIN	9674	149	3160754733	59205289	0.0187314	0.00147812	181.207	-32.2073
	noncanon	1725	4	HERVH	7702	112	3160754733	59205289	0.0187314	0.000707926	144.269	-32.2691
	noncanon	3540	11	HERVE	3542	34	3160754733	59205289	0.0187314	3.93231e-06	66.3465	-32.3465
	canon	1475	4	HERVS	6432	88	3160754733	59205289	0.0187314	0.000312713	120.48	-32.4802
	noncanon	5646	X	HERVH	10116	157	3160754733	59205289	0.0187314	0.00157722	189.487	-32.4866
	canon	4276	15	HERVH	5635	73	3160754733	59205289	0.0187314	0.000152572	105.551	-32.5513
	canon	2587	7	HERVH	8628	129	3160754733	59205289	0.0187314	0.000965976	161.614	-32.6143
	noncanon	2124	6	HERVIP	5966	79	3160754733	59205289	0.0187314	0.000195215	111.751	-32.7514
	canon	486	2	HERVADP	7250	103	3160754733	59205289	0.0187314	0.000485039	135.802	-32.8025
	canon	4495	18	HERVL	5863	77	3160754733	59205289	0.0187314	0.000173123	109.822	-32.8221
	canon	1973	5	HERVH	5705	74	3160754733	59205289	0.0187314	0.000146135	106.863	-32.8625
	noncanon	1476	4	HERVH	6187	83	3160754733	59205289	0.0187314	0.000225686	115.891	-32.891
	canon	965	3	HERVH	6244	84	3160754733	59205289	0.0187314	0.000231387	116.959	-32.9587
	noncanon	4131	14	HERVW	3148	26	3160754733	59205289	0.0187314	5.58469e-07	58.9664	-32.9664
	noncanon	491	2	HERVH	6139	82	3160754733	59205289	0.0187314	0.000209456	114.992	-32.9919
	noncanon	1538	4	HML3	6888	96	3160754733	59205289	0.0187314	0.000364679	129.022	-33.0217
	noncanon	6164	1	HML1	4925	59	3160754733	59205289	0.0187314	4.78693e-05	92.252	-33.252
	noncanon	2306	6	HERVIP	4235	46	3160754733	59205289	0.0187314	1.3364e-05	79.3274	-33.3274
	noncanon	2074	6	HERVFB	3969	41	3160754733	59205289	0.0187314	7.07522e-06	74.3448	-33.3448
	noncanon	2671	7	HML3	10803	169	3160754733	59205289	0.0187314	0.0015919	202.355	-33.3551
	canon	567	2	HERVE	3864	39	3160754733	59205289	0.0187314	5.25148e-06	72.378	-33.378
	canon	3184	10	HERV9	6321	85	3160754733	59205289	0.0187314	0.000213035	118.401	-33.401
	canon	3417	11	HERVH	5841	76	3160754733	59205289	0.0187314	0.000137211	109.41	-33.41
	canon	5410	X	HERVH48	4619	53	3160754733	59205289	0.0187314	2.56957e-05	86.5202	-33.5202
	canon	926	3	HERV9	3552	33	3160754733	59205289	0.0187314	1.81397e-06	66.5339	-33.5339
	canon	5961	1	MER52	8145	119	3160754733	59205289	0.0187314	0.000629815	152.567	-33.5671
	canon	564	2	HERVH	6330	85	3160754733	59205289	0.0187314	0.000202963	118.57	-33.5696
	canon	3703	12	HERVH	5642	72	3160754733	59205289	0.0187314	0.000100529	105.682	-33.6824
	canon	4487	17	HERVH	5274	65	3160754733	59205289	0.0187314	6.18101e-05	98.7893	-33.7893
	canon	5549	X	HERVFB	6612	90	3160754733	59205289	0.0187314	0.000232168	123.852	-33.8519
	canon	6085	1	HERV9	7361	104	3160754733	59205289	0.0187314	0.000383061	137.882	-33.8817
	noncanon	1814	5	HARLEQUIN	7741	111	3160754733	59205289	0.0187314	0.000460351	145	-33.9996
	canon	1229	3	HERVH	6620	90	3160754733	59205289	0.0187314	0.000222684	124.002	-34.0017
	canon	6214	1	HERVH	6521	88	3160754733	59205289	0.0187314	0.000196349	122.147	-34.1473
	noncanon	911	3	HERV3	5678	72	3160754733	59205289	0.0187314	8.06861e-05	106.357	-34.3568
	canon	4009	13	HERVH	6694	91	3160754733	59205289	0.0187314	0.000208433	125.388	-34.3878
	canon	939	3	HERVADP	7282	102	3160754733	59205289	0.0187314	0.000314284	136.402	-34.4019
	canon	5582	X	HERVL	6536	88	3160754733	59205289	0.0187314	0.000181237	122.428	-34.4283
	canon	2440	7	HERVH	4295	46	3160754733	59205289	0.0187314	8.23671e-06	80.4513	-34.4513
	noncanon	2339	6	HERVH	5898	76	3160754733	59205289	0.0187314	9.81522e-05	110.478	-34.4777
	noncanon	5852	1	HML8	7500	106	3160754733	59205289	0.0187314	0.000351273	140.485	-34.4853
	noncanon	4890	21	HERVE	4200	44	3160754733	59205289	0.0187314	5.8055e-06	78.6718	-34.6718
	canon	4505	18	HML3	4467	49	3160754733	59205289	0.0187314	1.06375e-05	83.6731	-34.6731
	noncanon	3959	13	HERVH	8746	129	3160754733	59205289	0.0187314	0.000606201	163.825	-34.8246
	canon	2342	6	HERVH	7039	97	3160754733	59205289	0.0187314	0.000233227	131.85	-34.8502
	canon	2284	6	HERV3	4530	50	3160754733	59205289	0.0187314	1.10229e-05	84.8531	-34.8531
	noncanon	6086	1	HUERSP3	5603	70	3160754733	59205289	0.0187314	5.8273e-05	104.952	-34.9519
	canon	3459	11	HERVL	6460	86	3160754733	59205289	0.0187314	0.000139969	121.005	-35.0047
	canon	4787	19	MER4	6941	95	3160754733	59205289	0.0187314	0.000206307	130.014	-35.0145
	canon	1805	5	HML7	7371	103	3160754733	59205289	0.0187314	0.00027399	138.069	-35.069
	noncanon	927	3	RHERVI	9778	148	3160754733	59205289	0.0187314	0.000835024	183.155	-35.1554
	canon	5929	1	HERV9	5244	63	3160754733	59205289	0.0187314	3.19291e-05	98.2273	-35.2273
	canon	3209	10	HERVH	6526	87	3160754733	59205289	0.0187314	0.00013688	122.241	-35.241
	noncanon	509	2	HERVH	9415	141	3160754733	59205289	0.0187314	0.000701774	176.356	-35.3559
	noncanon	992	3	HERVH	7710	109	3160754733	59205289	0.0187314	0.00030641	144.419	-35.4189
	noncanon	4457	17	HML6	4085	41	3160754733	59205289	0.0187314	2.58614e-06	76.5177	-35.5177
	canon	1735	4	HERVH	6436	85	3160754733	59205289	0.0187314	0.000113254	120.555	-35.5551
	noncanon	796	2	HERVH	8311	120	3160754733	59205289	0.0187314	0.000399253	155.676	-35.6765
	noncanon	3806	12	MER57	9865	149	3160754733	59205289	0.0187314	0.000751699	184.785	-35.785
	noncanon	3882	12	HML5	5550	68	3160754733	59205289	0.0187314	3.58555e-05	103.959	-35.9591
	canon	3795	12	HML3	4216	43	3160754733	59205289	0.0187314	2.8035e-06	78.9715	-35.9715
	canon	708	2	HERVL	6514	86	3160754733	59205289	0.0187314	0.000103644	122.016	-36.0162
	canon	4741	19	HERVH	7371	102	3160754733	59205289	0.0187314	0.000203383	138.069	-36.069
	noncanon	5297	X	HERVW	5397	65	3160754733	59205289	0.0187314	2.72714e-05	101.093	-36.0932
	noncanon	957	3	HERV9	8549	124	3160754733	59205289	0.0187314	0.000400084	160.135	-36.1345
	noncanon	3292	10	HML1	3586	31	3160754733	59205289	0.0187314	2.99992e-07	67.1707	-36.1707
	noncanon	3518	11	HERV3	5776	72	3160754733	59205289	0.0187314	4.36967e-05	108.192	-36.1924
	noncanon	3193	10	HERVH	6901	93	3160754733	59205289	0.0187314	0.000133728	129.265	-36.2652
	canon	4745	19	HERVH	5942	75	3160754733	59205289	0.0187314	5.11764e-05	111.302	-36.3018
[truncated: 1,131 more rows]
