# Supplementary material for: Investigation of somatic single nucleotide variations in human endogenous retrovirus elements and their potential association with cancer
Source: PLoS One. 2019 Apr 1;14(4):e0213770. doi: 10.1371/journal.pone.0213770 (PMC6443178; doi:10.1371/journal.pone.0213770)
Supplement: S6 Table — (XLSX) [file pone.0213770.s008.xlsx]

## Sheet: Sheet1
HERV_Sequence	UniPort_AC	Gene_name	Chrmosome	Genome_Pos	Position_N	Ref_N	Var_N	Position_A	Ref_A	Var_A	Polyphen_Pred	DOID /Cancer type /HERV group	Function	HERV_ID	HERV Genus	HERV Supergroup	Accession/ PMID / Sources	Accession/ PMID / Sources	Accession/ PMID / Sources	Accession/ PMID / Sources
NonCanon	O95154	AKR7A3	1	19609254	967	A	G	323	T	A	benign	DOID:3571 / liver cancer/MST	-	5833	S		NM_012067/-/['COSMIC', 'ICGC']
NonCanon	O95154	AKR7A3	1	19609268	953	C	T	318	A	V	probably damaging	DOID:4159 / skin cancer/MST	-	5833	S		NM_012067/-/['TCGA']
NonCanon	O95154	AKR7A3	1	19609268	953	C	T	318	A	V	probably damaging	DOID:1793 / pancreatic cancer/MST	-	5833	S		NM_012067/-/['TCGA']
NonCanon	O95154	AKR7A3	1	19609290	931	G	A	311	V	I	benign	DOID:263 / kidney cancer/MST	-	5833	S		NM_012067/23797736/['COSMIC']
NonCanon	O95154	AKR7A3	1	19609292	929	C	T	310	A	V	benign	DOID:10534 / stomach cancer/MST	-	5833	S		NM_012067/-/['ICGC', 'TCGA']
NonCanon	O95154	AKR7A3	1	19609317	904	G	C	302	A	P	possibly damaging	DOID:1324 / lung cancer/MST	-	5833	S		NM_012067/-/['IntOGen', 'COSMIC']
NonCanon	Q8WXI4	ACOT11	1	55096491	1714	C	T	572	R	C	-	DOID:1793 / pancreatic cancer/HML3	Gain|Phosphorylation	5892	AB		NM_015547/24293293/['COSMIC']
NonCanon	Q8WXI4	ACOT11	1	55096492	1715	G	A	572	R	H	-	DOID:219 / colon cancer/HML3	Gain|Phosphorylation	5892	AB		NM_015547/-/['COSMIC']
NonCanon	Q8WXI4	ACOT11	1	55096492	1715	G	A	572	R	H	-	DOID:3070 / malignant glioma/HML3	Gain|Phosphorylation	5892	AB		NM_015547/-/['ICGC', 'TCGA']
NonCanon	Q8WXI4	ACOT11	1	55096492	1715	G	A	572	R	H	-	DOID:1319 / brain cancer/HML3	Gain|Phosphorylation	5892	AB		NM_015547/-/['COSMIC', 'IntOGen']
NonCanon	Q8WXI4	ACOT11	1	55096543	1766	T	C	589	L	P	-	DOID:4159 / skin cancer/HML3	-	5892	AB		NM_015547/-/['ICGC', 'TCGA']
NonCanon	Q8WXI4	ACOT11	1	55096549	1772	C	A	591	A	E	-	DOID:4362 / cervical cancer/HML3	-	5892	AB		NM_015547/-/['TCGA']
NonCanon	Q8WXI4	ACOT11	1	55100377	1799	G	A	600	R	Q	possibly damaging	DOID:2531 / hematologic cancer/HML3	Gain|Phosphorylation	5892	AB		NM_015547/-/['COSMIC', 'ICGC']
NonCanon	O43768	ENSA	1	150601910	37	G	C	13	E	Q	probably damaging	DOID:1324 / lung cancer/HML2	-	6062	AB		NM_004436/22980975/['COSMIC']	NM_207168/22980975/['COSMIC']	NM_207044/22980975/['COSMIC']	NM_207043/22980975/['COSMIC']
NonCanon	O43768	ENSA	1	150601923	24	G	T	8	E	D	benign	DOID:1993 / rectum cancer/HML2	-	6062	AB		NM_207043/-/['COSMIC']	NM_207044/-/['COSMIC']	NM_004436/-/['COSMIC']	NM_207168/-/['COSMIC']
NonCanon	O43768	ENSA	1	150601933	14	A	G	5	Q	R	possibly damaging	DOID:1324 / lung cancer/HML2	-	6062	AB		NM_207042/-/['COSMIC', 'IntOGen']	NM_004436/-/['COSMIC', 'IntOGen']	NM_207043/-/['COSMIC', 'IntOGen']	NM_207044/-/['COSMIC', 'IntOGen']
NonCanon	O43768	ENSA	1	150601936	11	A	C	4	K	T	probably damaging	DOID:263 / kidney cancer/HML2	-	6062	AB		NM_207168/-/['ICGC', 'TCGA']	NM_207042/-/['ICGC', 'TCGA']	NM_207043/-/['ICGC', 'TCGA']	NM_207044/-/['ICGC', 'TCGA']
NonCanon	O43768	ENSA	1	150601938	9	G	T	3	Q	H	probably damaging	DOID:219 / colon cancer/HML2	-	6062	AB		NM_207043/22895193/['COSMIC']	NM_004436/22895193/['COSMIC']	NM_207044/22895193/['COSMIC']	NM_207168/22895193/['COSMIC']
NonCanon	O43768	ENSA	1	150601942	5	C	A	2	S	Y	probably damaging	DOID:1612 / breast cancer/HML2	Loss|Phosphorylation	6062	AB		NM_207042/-/['COSMIC', 'IntOGen', 'ICGC', 'TCGA']	NM_207043/-/['COSMIC', 'IntOGen', 'ICGC', 'TCGA']	NM_004436/-/['COSMIC', 'IntOGen', 'ICGC', 'TCGA']	NM_207168/-/['COSMIC', 'IntOGen', 'ICGC', 'TCGA']
NonCanon	Q9UQP3	TNN	1	175067473	1861	G	C	621	D	H	probably damaging	DOID:11054 / urinary bladder cancer/HERV9	-	6114	GE	HERVW9	NM_022093/-/['IntOGen', 'COSMIC']
NonCanon	Q9UQP3	TNN	1	175067474	1862	A	G	621	D	G	probably damaging	DOID:219 / colon cancer/HERV9	-	6114	GE	HERVW9	NM_022093/-/['IntOGen']
NonCanon	Q9UQP3	TNN	1	175067474	1862	A	G	621	D	G	probably damaging	DOID:1993 / rectum cancer/HERV9	-	6114	GE	HERVW9	NM_022093/-/['COSMIC']
NonCanon	Q9UQP3	TNN	1	175067479	1867	C	G	623	P	A	probably damaging	DOID:11934 / head and neck cancer/HERV9	Gain|Phosphorylation	6114	GE	HERVW9	NM_022093/-/['TCGA']
NonCanon	Q9UQP3	TNN	1	175067489	1877	T	C	626	L	P	probably damaging	DOID:363 / uterine cancer/HERV9	-	6114	GE	HERVW9	NM_022093/-/['COSMIC', 'TCGA']
NonCanon	Q9UQP3	TNN	1	175067497	1885	G	T	629	D	Y	probably damaging	DOID:219 / colon cancer/HERV9	Gain|Phosphorylation	6114	GE	HERVW9	NM_022093/17932254/['COSMIC']
NonCanon	Q9UQP3	TNN	1	175067501	1889	G	A	630	R	Q	benign	DOID:1324 / lung cancer/HERV9	-	6114	GE	HERVW9	NM_022093/-/['IntOGen']	NM_022093/22941188/['COSMIC']
NonCanon	Q9UQP3	TNN	1	175067511	1899	G	C	633	E	D	probably damaging	DOID:10534 / stomach cancer/HERV9	-	6114	GE	HERVW9	NM_022093/-/['ICGC', 'TCGA']
NonCanon	Q9UQP3	TNN	1	175067519	1907	C	A	636	A	D	probably damaging	DOID:363 / uterine cancer/HERV9	Gain|Phosphorylation	6114	GE	HERVW9	NM_022093/-/['TCGA', 'COSMIC']
NonCanon	Q9UQP3	TNN	1	175067522	1910	C	T	637	T	M	probably damaging	DOID:10534 / stomach cancer/HERV9	-	6114	GE	HERVW9	NM_022093/-/['ICGC', 'TCGA']
NonCanon	Q9UQP3	TNN	1	175067522	1910	C	T	637	T	M	probably damaging	DOID:2531 / hematologic cancer/HERV9	-	6114	GE	HERVW9	NM_022093/22237106/['COSMIC']
NonCanon	Q9UQP3	TNN	1	175067533	1921	G	C	641	D	H	probably damaging	DOID:1324 / lung cancer/HERV9	Gain|Phosphorylation	6114	GE	HERVW9	NM_022093/-/['COSMIC', 'ICGC']
NonCanon	Q9UQP3	TNN	1	175067535	1923	C	A	641	D	E	possibly damaging	DOID:219 / colon cancer/HERV9	-	6114	GE	HERVW9	NM_022093/-/['COSMIC']
NonCanon	Q9UQP3	TNN	1	175067548	1936	G	A	646	A	T	benign	DOID:1324 / lung cancer/HERV9	Gain|Phosphorylation	6114	GE	HERVW9	NM_022093/-/['IntOGen', 'ICGC', 'TCGA', 'COSMIC']
NonCanon	Q9UQP3	TNN	1	175067563	1951	G	A	651	V	M	benign	DOID:10534 / stomach cancer/HERV9	Gain|Phosphorylation	6114	GE	HERVW9	NM_022093/-/['ICGC', 'TCGA']
NonCanon	Q9UQP3	TNN	1	175067601	1989	G	C	663	E	D	benign	DOID:1324 / lung cancer/HERV9	Gain|Phosphorylation	6114	GE	HERVW9	NM_022093/22980975/['COSMIC']
NonCanon	Q9UQP3	TNN	1	175067603	1991	T	C	664	V	A	benign	DOID:263 / kidney cancer/HERV9	Gain|Phosphorylation	6114	GE	HERVW9	NM_022093/23797736/['COSMIC']
NonCanon	Q9UQP3	TNN	1	175067612	2000	G	A	667	G	E	possibly damaging	DOID:4159 / skin cancer/HERV9	-	6114	GE	HERVW9	NM_022093/-/['ICGC', 'TCGA']
NonCanon	Q9UQP3	TNN	1	175067630	2018	C	G	673	T	R	probably damaging	DOID:11934 / head and neck cancer/HERV9	-	6114	GE	HERVW9	NM_022093/-/['TCGA']
NonCanon	Q9UQP3	TNN	1	175067630	2018	C	G	673	T	R	probably damaging	DOID:0060119 / pharynx cancer/HERV9	-	6114	GE	HERVW9	NM_022093/-/['IntOGen']
NonCanon	Q9UQP3	TNN	1	175067636	2024	T	C	675	L	P	probably damaging	DOID:10534 / stomach cancer/HERV9	-	6114	GE	HERVW9	NM_022093/-/['ICGC', 'TCGA']
NonCanon	Q9UQP3	TNN	1	175067651	2039	C	A	680	P	Q	probably damaging	DOID:1324 / lung cancer/HERV9	Loss|Binding Site	6114	GE	HERVW9	NM_022093/-/['COSMIC', 'IntOGen']
NonCanon	Q9UQP3	TNN	1	175067653	2041	G	T	681	G	C	probably damaging	DOID:1793 / pancreatic cancer/HERV9	-	6114	GE	HERVW9	NM_022093/-/['ICGC']
NonCanon	Q9UQP3	TNN	1	175067659	2047	G	T	683	E	X	-	DOID:11054 / urinary bladder cancer/HERV9	-	6114	GE	HERVW9	NM_022093/-/['IntOGen', 'COSMIC']
NonCanon	Q9UQP3	TNN	1	175067673	2061	C	A	687	H	Q	benign	DOID:1612 / breast cancer/HERV9	-	6114	GE	HERVW9	NM_022093/-/['COSMIC', 'ICGC', 'TCGA']
NonCanon	Q9UQP3	TNN	1	175067674	2062	G	T	688	V	L	probably damaging	DOID:1324 / lung cancer/HERV9	-	6114	GE	HERVW9	NM_022093/-/['COSMIC']
NonCanon	Q9UQP3	TNN	1	175067674	2062	G	A	688	V	M	probably damaging	DOID:1612 / breast cancer/HERV9	-	6114	GE	HERVW9	NM_022093/-/['ICGC']
NonCanon	Q9UQP3	TNN	1	175067683	2071	C	A	691	Q	K	benign	DOID:11934 / head and neck cancer/HERV9	-	6114	GE	HERVW9	NM_022093/-/['TCGA']
NonCanon	Q9UQP3	TNN	1	175067683	2071	C	A	691	Q	K	benign	DOID:0060119 / pharynx cancer/HERV9	-	6114	GE	HERVW9	NM_022093/-/['IntOGen']
NonCanon	Q9UQP3	TNN	1	175067689	2077	G	A	693	G	R	probably damaging	DOID:4159 / skin cancer/HERV9	-	6114	GE	HERVW9	NM_022093/21984974/['COSMIC']
NonCanon	Q9UQP3	TNN	1	175067695	2083	C	T	695	Q	X	-	DOID:4159 / skin cancer/HERV9	-	6114	GE	HERVW9	NM_022093/-/['TCGA']
NonCanon	Q9UQP3	TNN	1	175067702	2090	G	A	697	S	N	probably damaging	DOID:4159 / skin cancer/HERV9	Loss|Binding Site	6114	GE	HERVW9	NM_022093/-/['ICGC', 'TCGA']
NonCanon	Q9UQP3	TNN	1	175067705	2093	A	C	698	K	T	probably damaging	DOID:5041 / esophageal cancer/HERV9	Gain|Phosphorylation	6114	GE	HERVW9	NM_022093/23525077/['COSMIC']
NonCanon	Q9UQP3	TNN	1	175067711	2099	C	T	700	A	V	benign	DOID:4159 / skin cancer/HERV9	Loss|Binding Site	6114	GE	HERVW9	NM_022093/-/['ICGC', 'TCGA']
NonCanon	Q9UQP3	TNN	1	175067721	2109	G	T	703	K	N	possibly damaging	DOID:219 / colon cancer/HERV9	-	6114	GE	HERVW9	NM_022093/-/['ICGC', 'COSMIC', 'TCGA']
NonCanon	Q6PJW8	CNST	1	246805311	909	G	C	303	K	N	benign	DOID:1612 / breast cancer/HERVH48	-	6245	GE	HERVHF	NM_152609/-/['COSMIC', 'IntOGen', 'ICGC', 'TCGA']	NM_001139459/-/['COSMIC', 'IntOGen', 'ICGC', 'TCGA']
NonCanon	Q6PJW8	CNST	1	246805311	909	G	T	303	K	N	benign	DOID:219 / colon cancer/HERVH48	-	6245	GE	HERVHF	NM_001139459/-/['TCGA']	NM_152609/-/['TCGA']
NonCanon	Q6PJW8	CNST	1	246805333	931	G	A	311	E	K	benign	DOID:11934 / head and neck cancer/HERVH48	-	6245	GE	HERVHF	NM_152609/-/['TCGA']	NM_001139459/-/['TCGA']
NonCanon	Q6PJW8	CNST	1	246805333	931	G	A	311	E	K	benign	DOID:0060119 / pharynx cancer/HERVH48	-	6245	GE	HERVHF	NM_001139459/-/['IntOGen']	NM_152609/-/['IntOGen']
NonCanon	P19525	EIF2AK2	2	37353432	908	A	T	303	E	V	possibly damaging	DOID:363 / uterine cancer/HERVFA	Gain|Phosphorylation	510	GE	HERVHF	NM_001135651/-/['COSMIC', 'TCGA']	NM_002759/-/['COSMIC', 'TCGA']
NonCanon	P19525	EIF2AK2	2	37353434	906	C	G	302	N	K	benign	DOID:2531 / hematologic cancer/HERVFA	-	510	GE	HERVHF	NM_001135651/21909114/['COSMIC']	NM_002759/21909114/['COSMIC']
NonCanon	P19525	EIF2AK2	2	37353450	890	G	A	297	R	H	probably damaging	DOID:363 / uterine cancer/HERVFA	Gain|Phosphorylation	510	GE	HERVHF	NM_002759/-/['COSMIC', 'TCGA']	NM_001135651/-/['COSMIC', 'TCGA']
NonCanon	P19525	EIF2AK2	2	37353460	880	G	A	294	V	I	possibly damaging	DOID:1793 / pancreatic cancer/HERVFA	Gain|Phosphorylation	510	GE	HERVHF	NM_001135651/-/['COSMIC']	NM_002759/-/['COSMIC']
NonCanon	P19525	EIF2AK2	2	37353502	838	C	T	280	Q	X	-	DOID:3571 / liver cancer/HERVFA	-	510	GE	HERVHF	NM_001135651/23788652/['COSMIC']	NM_002759/23788652/['COSMIC']
NonCanon	P19525	EIF2AK2	2	37353505	835	G	C	279	G	R	probably damaging	DOID:11054 / urinary bladder cancer/HERVFA	Loss|Binding Site	510	GE	HERVHF	NM_001135651/-/['COSMIC', 'ICGC']	NM_001135651/24121792/['COSMIC']	NM_002759/-/['COSMIC', 'ICGC']	NM_002759/24121792/['COSMIC']
NonCanon	P19525	EIF2AK2	2	37353530	810	A	G	270	I	M	probably damaging	DOID:1324 / lung cancer/HERVFA	-	510	GE	HERVHF	NM_001135651/22975805/['COSMIC']	NM_002759/22975805/['COSMIC']
NonCanon	P19525	EIF2AK2	2	37353552	788	T	C	263	F	S	probably damaging	DOID:10534 / stomach cancer/HERVFA	Gain|Phosphorylation	510	GE	HERVHF	NM_002759/-/['ICGC', 'TCGA']	NM_001135651/-/['ICGC', 'TCGA']
NonCanon	P19525	EIF2AK2	2	37362649	763	A	G	255	T	A	benign	DOID:263 / kidney cancer/HERVFA	Loss|Phosphorylation	510	GE	HERVHF	NM_001135651/-/['COSMIC']	NM_001135652/-/['COSMIC']	NM_002759/-/['COSMIC']
NonCanon	P19525	EIF2AK2	2	37362678	734	C	T	245	P	L	probably damaging	DOID:4159 / skin cancer/HERVFA	-	510	GE	HERVHF	NM_001135651/-/['ICGC', 'TCGA']	NM_002759/-/['ICGC', 'TCGA']	NM_001135652/-/['ICGC', 'TCGA']
NonCanon	P98164	LRP2	2	169989100	13712	C	T	4571	A	V	benign	DOID:4159 / skin cancer/HERVH	-	744	GE	HERVHF	NM_004525/21984974/['COSMIC']
NonCanon	P98164	LRP2	2	169989122	13690	G	C	4564	E	Q	benign	DOID:11934 / head and neck cancer/HERVH	-	744	GE	HERVHF	NM_004525/-/['TCGA']
NonCanon	P98164	LRP2	2	169989157	13655	A	G	4552	Y	C	possibly damaging	DOID:363 / uterine cancer/HERVH	-	744	GE	HERVHF	NM_004525/-/['TCGA', 'COSMIC']
NonCanon	P98164	LRP2	2	169989163	13649	A	G	4550	K	R	benign	DOID:263 / kidney cancer/HERVH	-	744	GE	HERVHF	NM_004525/-/['COSMIC', 'IntOGen', 'ICGC', 'TCGA']
NonCanon	P98164	LRP2	2	169989169	13643	A	T	4548	D	V	benign	DOID:10534 / stomach cancer/HERVH	-	744	GE	HERVHF	NM_004525/-/['ICGC', 'TCGA']
NonCanon	P98164	LRP2	2	169989179	13633	G	A	4545	E	K	benign	DOID:4159 / skin cancer/HERVH	Gain|Phosphorylation	744	GE	HERVHF	NM_004525/-/['ICGC', 'TCGA']
NonCanon	P98164	LRP2	2	169989191	13621	G	A	4541	V	M	possibly damaging	DOID:219 / colon cancer/HERVH	-	744	GE	HERVHF	NM_004525/-/['COSMIC']
NonCanon	P98164	LRP2	2	169993902	13620	G	T	4540	Q	H	possibly damaging	DOID:1612 / breast cancer/HERVH	-	744	GE	HERVHF	NM_004525/-/['COSMIC', 'IntOGen', 'ICGC', 'TCGA']
NonCanon	P98164	LRP2	2	169993904	13618	C	T	4540	Q	X	-	DOID:2394 / ovarian cancer/HERVH	-	744	GE	HERVHF	NM_004525/23856246/['COSMIC']
NonCanon	P98164	LRP2	2	169993919	13603	G	A	4535	V	M	benign	DOID:4159 / skin cancer/HERVH	-	744	GE	HERVHF	NM_004525/-/['TCGA']
NonCanon	P98164	LRP2	2	169993921	13601	A	C	4534	K	T	benign	DOID:363 / uterine cancer/HERVH	-	744	GE	HERVHF	NM_004525/-/['COSMIC', 'TCGA']
NonCanon	P98164	LRP2	2	169993944	13578	C	G	4526	Y	X	-	DOID:263 / kidney cancer/HERVH	-	744	GE	HERVHF	NM_004525/-/['COSMIC', 'TCGA']
NonCanon	P98164	LRP2	2	169993958	13564	G	C	4522	E	Q	probably damaging	DOID:11934 / head and neck cancer/HERVH	-	744	GE	HERVHF	NM_004525/-/['TCGA']
NonCanon	P98164	LRP2	2	169993958	13564	G	C	4522	E	Q	probably damaging	DOID:0060119 / pharynx cancer/HERVH	-	744	GE	HERVHF	NM_004525/-/['IntOGen']
NonCanon	Q6IFH4	OR6B2	2	240969231	616	A	T	206	I	F	possibly damaging	DOID:10534 / stomach cancer/MLT	-	845	S		NM_001005853/-/['ICGC', 'TCGA']
NonCanon	Q6IFH4	OR6B2	2	240969278	569	C	T	190	T	M	possibly damaging	DOID:219 / colon cancer/MLT	-	845	S		NM_001005853/-/['COSMIC', 'ICGC', 'TCGA']
NonCanon	Q6IFH4	OR6B2	2	240969284	563	C	T	188	A	V	probably damaging	DOID:1324 / lung cancer/MLT	-	845	S		NM_001005853/22980975/['COSMIC']
NonCanon	Q6IFH4	OR6B2	2	240969308	539	A	G	180	D	G	probably damaging	DOID:1521 / cecum cancer/MLT	-	845	S		NM_001005853/22810696/['COSMIC']
NonCanon	Q6IFH4	OR6B2	2	240969312	535	T	C	179	C	R	probably damaging	DOID:219 / colon cancer/MLT	-	845	S		NM_001005853/-/['ICGC', 'COSMIC', 'TCGA']
NonCanon	Q6IFH4	OR6B2	2	240969312	535	T	C	179	C	R	probably damaging	DOID:2531 / hematologic cancer/MLT	-	845	S		NM_001005853/-/['ICGC']
NonCanon	Q6IFH4	OR6B2	2	240969456	391	C	T	131	R	C	benign	DOID:1319 / brain cancer/MLT	-	845	S		NM_001005853/24140581/['COSMIC']
NonCanon	Q6IFH4	OR6B2	2	240969461	386	C	T	129	P	L	probably damaging	DOID:1993 / rectum cancer/MLT	-	845	S		NM_001005853/22810696/['COSMIC']
NonCanon	Q6IFH4	OR6B2	2	240969469	378	C	G	126	I	M	probably damaging	DOID:4362 / cervical cancer/MLT	-	845	S		NM_001005853/-/['TCGA']
NonCanon	Q6IFH4	OR6B2	2	240969483	364	C	T	122	R	C	probably damaging	DOID:2531 / hematologic cancer/MLT	-	845	S		NM_001005853/-/['ICGC']
NonCanon	Q6IFH4	OR6B2	2	240969483	364	C	A	122	R	S	probably damaging	DOID:2531 / hematologic cancer/MLT	-	845	S		NM_001005853/-/['ICGC']
NonCanon	Q6IFH4	OR6B2	2	240969497	350	C	T	117	S	F	probably damaging	DOID:1324 / lung cancer/MLT	-	845	S		NM_001005853/-/['COSMIC']
NonCanon	Q6IFH4	OR6B2	2	240969557	290	G	T	97	C	F	probably damaging	DOID:1324 / lung cancer/MLT	-	845	S		NM_001005853/-/['IntOGen', 'COSMIC']
NonCanon	Q6IFH4	OR6B2	2	240969576	271	C	T	91	R	C	benign	DOID:219 / colon cancer/MLT	-	845	S		NM_001005853/-/['COSMIC', 'ICGC', 'TCGA']
NonCanon	Q6IFH4	OR6B2	2	240969576	271	C	T	91	R	C	benign	DOID:363 / uterine cancer/MLT	-	845	S		NM_001005853/-/['COSMIC', 'TCGA']
NonCanon	Q6IFH4	OR6B2	2	240969576	271	C	T	91	R	C	benign	DOID:1612 / breast cancer/MLT	-	845	S		NM_001005853/-/['COSMIC']
NonCanon	Q6IFH4	OR6B2	2	240969639	208	G	T	70	E	X	-	DOID:1324 / lung cancer/MLT	-	845	S		NM_001005853/-/['COSMIC', 'IntOGen', 'ICGC', 'TCGA']
NonCanon	Q6IFH4	OR6B2	2	240969643	204	C	G	68	F	L	benign	DOID:263 / kidney cancer/MLT	-	845	S		NM_001005853/-/['ICGC', 'TCGA']
NonCanon	Q6IFH4	OR6B2	2	240969669	178	T	C	60	Y	H	probably damaging	DOID:305 / carcinoma/MLT	-	845	S		NM_001005853/21892161/['COSMIC']
NonCanon	Q6IFH4	OR6B2	2	240969686	161	C	T	54	S	F	possibly damaging	DOID:4159 / skin cancer/MLT	-	845	S		NM_001005853/-/['ICGC', 'TCGA']
NonCanon	Q6IFH4	OR6B2	2	240969689	158	C	T	53	T	I	benign	DOID:363 / uterine cancer/MLT	-	845	S		NM_001005853/-/['COSMIC', 'IntOGen', 'TCGA']
NonCanon	Q6IFH4	OR6B2	2	240969740	107	T	A	36	L	H	probably damaging	DOID:11934 / head and neck cancer/MLT	-	845	S		NM_001005853/-/['TCGA']
NonCanon	Q6IFH4	OR6B2	2	240969788	59	C	T	20	A	V	benign	DOID:4159 / skin cancer/MLT	Gain|Phosphorylation	845	S		NM_001005853/-/['TCGA']
NonCanon	Q6IFH4	OR6B2	2	240969789	58	G	A	20	A	T	benign	DOID:4159 / skin cancer/MLT	Gain|Phosphorylation	845	S		NM_001005853/-/['ICGC', 'TCGA']
NonCanon	Q6IFH4	OR6B2	2	240969840	7	G	C	3	G	R	benign	DOID:1324 / lung cancer/MLT	-	845	S		NM_001005853/-/['COSMIC', 'IntOGen']
NonCanon	Q8WXC7	PRR21	2	240981262	1138	T	G	380	S	A	possibly damaging	DOID:219 / colon cancer/MLT	-	845	S		NM_001080835/-/['ICGC', 'COSMIC', 'TCGA']
NonCanon	Q8WXC7	PRR21	2	240981262	1138	T	G	380	S	A	possibly damaging	DOID:1793 / pancreatic cancer/MLT	-	845	S		NM_001080835/-/['TCGA']
NonCanon	Q8WXC7	PRR21	2	240981267	1133	T	A	378	L	H	probably damaging	DOID:1324 / lung cancer/MLT	-	845	S		NM_001080835/-/['COSMIC', 'IntOGen']
NonCanon	Q8WXC7	PRR21	2	240981279	1121	A	G	374	N	S	possibly damaging	DOID:10534 / stomach cancer/MLT	-	845	S		NM_001080835/-/['ICGC', 'TCGA']
NonCanon	Q8WXC7	PRR21	2	240981288	1112	C	G	371	A	G	probably damaging	DOID:10534 / stomach cancer/MLT	-	845	S		NM_001080835/-/['ICGC', 'TCGA']
NonCanon	Q8WXC7	PRR21	2	240981324	1076	C	A	359	S	X	-	DOID:1324 / lung cancer/MLT	-	845	S		NM_001080835/22980975/['COSMIC']
NonCanon	Q8WXC7	PRR21	2	240981360	1040	G	A	347	R	H	benign	DOID:10534 / stomach cancer/MLT	Gain|Phosphorylation	845	S		NM_001080835/-/['ICGC', 'TCGA']
NonCanon	Q8WXC7	PRR21	2	240981361	1039	C	T	347	R	C	benign	DOID:3571 / liver cancer/MLT	Gain|Phosphorylation	845	S		NM_001080835/-/['ICGC', 'COSMIC']
NonCanon	Q8WXC7	PRR21	2	240981361	1039	C	T	347	R	C	benign	DOID:10283 / prostate cancer/MLT	Gain|Phosphorylation	845	S		NM_001080835/22722839/['COSMIC']
NonCanon	Q8WXC7	PRR21	2	240981375	1025	A	T	342	K	M	benign	DOID:1793 / pancreatic cancer/MLT	-	845	S		NM_001080835/-/['TCGA']
NonCanon	Q8WXC7	PRR21	2	240981381	1019	C	T	340	S	L	benign	DOID:4159 / skin cancer/MLT	Gain|Phosphorylation	845	S		NM_001080835/-/['ICGC', 'TCGA']	NM_001080835/21499247/['COSMIC']
NonCanon	Q8WXC7	PRR21	2	240981381	1019	C	T	340	S	L	benign	DOID:1909 / melanoma/MLT	Gain|Phosphorylation	845	S		NM_001080835/-/['ClinVar']
NonCanon	Q8WXC7	PRR21	2	240981400	1000	C	T	334	P	S	possibly damaging	DOID:4159 / skin cancer/MLT	Gain|Phosphorylation	845	S		NM_001080835/22842228/['COSMIC']
NonCanon	Q8WXC7	PRR21	2	240981403	997	C	T	333	R	W	probably damaging	DOID:363 / uterine cancer/MLT	Gain|Phosphorylation	845	S		NM_001080835/-/['TCGA', 'COSMIC']
NonCanon	Q8WXC7	PRR21	2	240981423	977	C	A	326	S	X	-	DOID:363 / uterine cancer/MLT	-	845	S		NM_001080835/-/['COSMIC', 'TCGA']
NonCanon	Q8WXC7	PRR21	2	240981423	977	C	T	326	S	L	probably damaging	DOID:4362 / cervical cancer/MLT	Gain|Phosphorylation	845	S		NM_001080835/-/['TCGA']
NonCanon	Q8WXC7	PRR21	2	240981426	974	C	G	325	S	C	benign	DOID:11934 / head and neck cancer/MLT	-	845	S		NM_001080835/-/['TCGA']
NonCanon	Q8WXC7	PRR21	2	240981426	974	C	G	325	S	C	benign	DOID:0060119 / pharynx cancer/MLT	-	845	S		NM_001080835/-/['IntOGen']
NonCanon	Q8WXC7	PRR21	2	240981432	968	A	G	323	H	R	possibly damaging	DOID:219 / colon cancer/MLT	-	845	S		NM_001080835/-/['COSMIC']
NonCanon	Q8WXC7	PRR21	2	240981432	968	A	G	323	H	R	possibly damaging	DOID:1521 / cecum cancer/MLT	-	845	S		NM_001080835/-/['COSMIC']
NonCanon	Q8WXC7	PRR21	2	240981436	964	G	C	322	V	L	benign	DOID:263 / kidney cancer/MLT	Gain|Phosphorylation	845	S		NM_001080835/-/['TCGA']
NonCanon	Q8WXC7	PRR21	2	240981445	955	C	T	319	R	W	probably damaging	DOID:10534 / stomach cancer/MLT	Gain|Phosphorylation	845	S		NM_001080835/-/['ICGC', 'TCGA']
NonCanon	Q8WXC7	PRR21	2	240981459	941	T	C	314	M	T	benign	DOID:3571 / liver cancer/MLT	Gain|Phosphorylation	845	S		NM_001080835/-/['COSMIC', 'ICGC']
NonCanon	Q8WXC7	PRR21	2	240981459	941	T	C	314	M	T	benign	DOID:8618 / oral cavity cancer/MLT	Gain|Phosphorylation	845	S		NM_001080835/23619168/['COSMIC']
NonCanon	Q8WXC7	PRR21	2	240981472	928	G	T	310	G	C	probably damaging	DOID:10283 / prostate cancer/MLT	-	845	S		NM_001080835/-/['COSMIC']
NonCanon	Q8WXC7	PRR21	2	240981475	925	C	T	309	H	Y	benign	DOID:4159 / skin cancer/MLT	Gain|Phosphorylation	845	S		NM_001080835/-/['TCGA']
NonCanon	Q8WXC7	PRR21	2	240981487	913	T	C	305	C	R	benign	DOID:1781 / thyroid cancer/MLT	Gain|Phosphorylation	845	S		NM_001080835/-/['ICGC', 'COSMIC']
NonCanon	Q8WXC7	PRR21	2	240981487	913	T	C	305	C	R	benign	DOID:3571 / liver cancer/MLT	Gain|Phosphorylation	845	S		NM_001080835/-/['COSMIC']
NonCanon	Q8WXC7	PRR21	2	240981487	913	T	C	305	C	R	benign	DOID:1993 / rectum cancer/MLT	Gain|Phosphorylation	845	S		NM_001080835/-/['COSMIC']
NonCanon	Q8WXC7	PRR21	2	240981492	908	G	A	303	R	H	benign	DOID:1781 / thyroid cancer/MLT	Gain|Phosphorylation	845	S		NM_001080835/-/['COSMIC', 'ICGC']
NonCanon	Q8WXC7	PRR21	2	240981513	887	C	G	296	A	G	possibly damaging	DOID:1781 / thyroid cancer/MLT	-	845	S		NM_001080835/-/['COSMIC', 'ICGC']
NonCanon	Q8WXC7	PRR21	2	240981519	881	T	C	294	V	A	possibly damaging	DOID:1781 / thyroid cancer/MLT	-	845	S		NM_001080835/-/['COSMIC', 'ICGC']
NonCanon	Q8WXC7	PRR21	2	240981520	880	G	A	294	V	I	possibly damaging	DOID:1781 / thyroid cancer/MLT	-	845	S		NM_001080835/-/['COSMIC', 'ICGC']
NonCanon	Q8WXC7	PRR21	2	240981541	859	C	G	287	P	A	probably damaging	DOID:1781 / thyroid cancer/MLT	-	845	S		NM_001080835/-/['ICGC', 'COSMIC']
NonCanon	Q8WXC7	PRR21	2	240981543	857	T	C	286	M	T	benign	DOID:1781 / thyroid cancer/MLT	Gain|Phosphorylation	845	S		NM_001080835/-/['ICGC', 'COSMIC']
NonCanon	Q8WXC7	PRR21	2	240981547	853	T	C	285	S	P	possibly damaging	DOID:1781 / thyroid cancer/MLT	Gain|Phosphorylation	845	S		NM_001080835/-/['COSMIC', 'ICGC']
NonCanon	Q8WXC7	PRR21	2	240981555	845	G	T	282	G	V	possibly damaging	DOID:1781 / thyroid cancer/MLT	-	845	S		NM_001080835/-/['COSMIC', 'ICGC']
NonCanon	Q8WXC7	PRR21	2	240981569	831	C	G	277	C	W	benign	DOID:1781 / thyroid cancer/MLT	Gain|Phosphorylation	845	S		NM_001080835/-/['COSMIC', 'ICGC']
NonCanon	Q8WXC7	PRR21	2	240981571	829	T	C	277	C	R	benign	DOID:1781 / thyroid cancer/MLT	Gain|Phosphorylation	845	S		NM_001080835/-/['COSMIC', 'ICGC']
NonCanon	Q8WXC7	PRR21	2	240981576	824	G	A	275	R	H	possibly damaging	DOID:1781 / thyroid cancer/MLT	Gain|Phosphorylation	845	S		NM_001080835/-/['COSMIC', 'ICGC']
NonCanon	Q8WXC7	PRR21	2	240981583	817	G	T	273	A	S	benign	DOID:1324 / lung cancer/MLT	-	845	S		NM_001080835/-/['ICGC', 'COSMIC']
NonCanon	Q8WXC7	PRR21	2	240981597	803	C	G	268	A	G	benign	DOID:1781 / thyroid cancer/MLT	-	845	S		NM_001080835/-/['COSMIC', 'ICGC']
NonCanon	Q8WXC7	PRR21	2	240981603	797	T	C	266	L	P	benign	DOID:1781 / thyroid cancer/MLT	-	845	S		NM_001080835/-/['COSMIC', 'ICGC']
NonCanon	Q8WXC7	PRR21	2	240981604	796	C	A	266	L	I	benign	DOID:1324 / lung cancer/MLT	-	845	S		NM_001080835/-/['COSMIC', 'ICGC']
NonCanon	Q8WXC7	PRR21	2	240981604	796	C	A	266	L	I	benign	DOID:1781 / thyroid cancer/MLT	-	845	S		NM_001080835/-/['COSMIC', 'ICGC']
NonCanon	Q8WXC7	PRR21	2	240981655	745	T	C	249	C	R	benign	DOID:10534 / stomach cancer/MLT	Gain|Phosphorylation	845	S		NM_001080835/-/['COSMIC']
NonCanon	Q8WXC7	PRR21	2	240981655	745	T	C	249	C	R	benign	DOID:11054 / urinary bladder cancer/MLT	Gain|Phosphorylation	845	S		NM_001080835/-/['ICGC', 'COSMIC']
NonCanon	Q8WXC7	PRR21	2	240981681	719	C	G	240	A	G	possibly damaging	DOID:1324 / lung cancer/MLT	-	845	S		NM_001080835/-/['ICGC', 'COSMIC']
NonCanon	Q8WXC7	PRR21	2	240981688	712	G	A	238	V	I	possibly damaging	DOID:1324 / lung cancer/MLT	-	845	S		NM_001080835/-/['COSMIC', 'ICGC']
NonCanon	Q8WXC7	PRR21	2	240981688	712	G	C	238	V	L	benign	DOID:11054 / urinary bladder cancer/MLT	Gain|Phosphorylation	845	S		NM_001080835/-/['COSMIC', 'ICGC']
NonCanon	Q8WXC7	PRR21	2	240981693	707	C	T	236	P	L	probably damaging	DOID:1324 / lung cancer/MLT	Gain|Phosphorylation	845	S		NM_001080835/-/['COSMIC', 'ICGC']
NonCanon	Q8WXC7	PRR21	2	240981709	691	C	G	231	P	A	probably damaging	DOID:1324 / lung cancer/MLT	Gain|Phosphorylation	845	S		NM_001080835/-/['COSMIC', 'ICGC']
NonCanon	Q8WXC7	PRR21	2	240981744	656	C	G	219	P	R	possibly damaging	DOID:11054 / urinary bladder cancer/MLT	Gain|Phosphorylation	845	S		NM_001080835/-/['COSMIC', 'ICGC']
NonCanon	Q8WXC7	PRR21	2	240981744	656	C	G	219	P	R	possibly damaging	DOID:1319 / brain cancer/MLT	Gain|Phosphorylation	845	S		NM_001080835/23917401/['COSMIC']
NonCanon	Q8WXC7	PRR21	2	240981795	605	T	C	202	M	T	benign	DOID:11054 / urinary bladder cancer/MLT	Gain|Phosphorylation	845	S		NM_001080835/-/['COSMIC', 'ICGC']
NonCanon	Q8WXC7	PRR21	2	240981808	592	G	T	198	G	C	probably damaging	DOID:1324 / lung cancer/MLT	-	845	S		NM_001080835/-/['COSMIC', 'ICGC']
NonCanon	Q8WXC7	PRR21	2	240981823	577	T	C	193	C	R	benign	DOID:11054 / urinary bladder cancer/MLT	Gain|Phosphorylation	845	S		NM_001080835/-/['ICGC', 'COSMIC']
NonCanon	Q8WXC7	PRR21	2	240981940	460	C	A	154	L	I	benign	DOID:10283 / prostate cancer/MLT	-	845	S		NM_001080835/-/['ICGC']
NonCanon	Q8WXC7	PRR21	2	240981996	404	C	G	135	P	R	benign	DOID:1324 / lung cancer/MLT	Gain|Phosphorylation	845	S		NM_001080835/-/['COSMIC', 'ICGC']
NonCanon	Q8WXC7	PRR21	2	240981996	404	C	G	135	P	R	benign	DOID:219 / colon cancer/MLT	Gain|Phosphorylation	845	S		NM_001080835/-/['IntOGen']	NM_001080835/22810696/['COSMIC']
NonCanon	Q8WXC7	PRR21	2	240982009	391	C	T	131	P	S	probably damaging	DOID:1793 / pancreatic cancer/MLT	Gain|Phosphorylation	845	S		NM_001080835/-/['TCGA']
NonCanon	Q8WXC7	PRR21	2	240982009	391	C	T	131	P	S	probably damaging	DOID:1909 / melanoma/MLT	Gain|Phosphorylation	845	S		NM_001080835/22622578/['COSMIC']
NonCanon	Q8WXC7	PRR21	2	240982053	347	C	T	116	S	L	probably damaging	DOID:5041 / esophageal cancer/MLT	-	845	S		NM_001080835/23525077/['COSMIC']
NonCanon	Q8WXC7	PRR21	2	240982080	320	G	C	107	R	P	benign	DOID:10283 / prostate cancer/MLT	Gain|Phosphorylation	845	S		NM_001080835/-/['COSMIC']
NonCanon	Q8WXC7	PRR21	2	240982089	311	C	T	104	T	M	probably damaging	DOID:10534 / stomach cancer/MLT	-	845	S		NM_001080835/-/['ICGC', 'TCGA']
NonCanon	Q8WXC7	PRR21	2	240982108	292	G	C	98	V	L	benign	DOID:4159 / skin cancer/MLT	Gain|Phosphorylation	845	S		NM_001080835/22622578/['COSMIC', 'COSMIC']
NonCanon	Q8WXC7	PRR21	2	240982108	292	G	C	98	V	L	benign	DOID:1324 / lung cancer/MLT	Gain|Phosphorylation	845	S		NM_001080835/22980975/['COSMIC']
NonCanon	Q8WXC7	PRR21	2	240982108	292	G	C	98	V	L	benign	DOID:1793 / pancreatic cancer/MLT	Gain|Phosphorylation	845	S		NM_001080835/-/['TCGA']
NonCanon	Q8WXC7	PRR21	2	240982108	292	G	A	98	V	I	benign	DOID:10283 / prostate cancer/MLT	-	845	S		NM_001080835/-/['COSMIC']
NonCanon	Q8WXC7	PRR21	2	240982116	284	G	T	95	R	L	possibly damaging	DOID:1324 / lung cancer/MLT	Gain|Phosphorylation	845	S		NM_001080835/-/['COSMIC', 'ICGC']
NonCanon	Q8WXC7	PRR21	2	240982116	284	G	T	95	R	L	possibly damaging	DOID:1781 / thyroid cancer/MLT	Gain|Phosphorylation	845	S		NM_001080835/-/['ICGC', 'COSMIC']
NonCanon	Q8WXC7	PRR21	2	240982116	284	G	T	95	R	L	possibly damaging	DOID:1612 / breast cancer/MLT	Gain|Phosphorylation	845	S		NM_001080835/-/['ICGC', 'TCGA', 'COSMIC']
NonCanon	Q8WXC7	PRR21	2	240982120	280	C	A	94	P	T	probably damaging	DOID:1324 / lung cancer/MLT	Gain|Phosphorylation	845	S		NM_001080835/-/['COSMIC']
NonCanon	Q8WXC7	PRR21	2	240982126	274	C	A	92	L	I	possibly damaging	DOID:2394 / ovarian cancer/MLT	Gain|Phosphorylation	845	S		NM_001080835/-/['COSMIC']
NonCanon	Q8WXC7	PRR21	2	240982129	271	C	G	91	P	A	benign	DOID:1781 / thyroid cancer/MLT	Gain|Phosphorylation	845	S		NM_001080835/-/['COSMIC', 'ICGC']
NonCanon	Q8WXC7	PRR21	2	240982129	271	C	G	91	P	A	benign	DOID:1793 / pancreatic cancer/MLT	Gain|Phosphorylation	845	S		NM_001080835/-/['TCGA']
NonCanon	Q8WXC7	PRR21	2	240982129	271	C	G	91	P	A	benign	DOID:3571 / liver cancer/MLT	Gain|Phosphorylation	845	S		NM_001080835/-/['COSMIC']
NonCanon	Q8WXC7	PRR21	2	240982131	269	T	C	90	M	T	benign	DOID:1781 / thyroid cancer/MLT	Gain|Phosphorylation	845	S		NM_001080835/-/['COSMIC', 'ICGC']
NonCanon	Q8WXC7	PRR21	2	240982131	269	T	C	90	M	T	benign	DOID:1793 / pancreatic cancer/MLT	Gain|Phosphorylation	845	S		NM_001080835/-/['TCGA']
NonCanon	Q8WXC7	PRR21	2	240982131	269	T	C	90	M	T	benign	DOID:3571 / liver cancer/MLT	Gain|Phosphorylation	845	S		NM_001080835/-/['COSMIC']
NonCanon	Q8WXC7	PRR21	2	240982137	263	C	T	88	S	L	possibly damaging	DOID:1324 / lung cancer/MLT	-	845	S		NM_001080835/-/['COSMIC', 'IntOGen']
NonCanon	Q8WXC7	PRR21	2	240982159	241	C	T	81	R	W	benign	DOID:363 / uterine cancer/MLT	Gain|Phosphorylation	845	S		NM_001080835/-/['COSMIC', 'TCGA']
NonCanon	Q8WXC7	PRR21	2	240982164	236	A	G	79	H	R	benign	DOID:1781 / thyroid cancer/MLT	Gain|Phosphorylation	845	S		NM_001080835/-/['COSMIC', 'ICGC']
NonCanon	Q8WXC7	PRR21	2	240982164	236	A	G	79	H	R	benign	DOID:2531 / hematologic cancer/MLT	Gain|Phosphorylation	845	S		NM_001080835/23222956/['COSMIC']
NonCanon	Q8WXC7	PRR21	2	240982171	229	T	G	77	S	A	benign	DOID:1781 / thyroid cancer/MLT	Gain|Phosphorylation	845	S		NM_001080835/-/['ICGC', 'COSMIC']
NonCanon	Q8WXC7	PRR21	2	240982171	229	T	G	77	S	A	benign	DOID:1793 / pancreatic cancer/MLT	Gain|Phosphorylation	845	S		NM_001080835/-/['TCGA']
NonCanon	Q8WXC7	PRR21	2	240982171	229	T	G	77	S	A	benign	DOID:263 / kidney cancer/MLT	Gain|Phosphorylation	845	S		NM_001080835/-/['TCGA']
NonCanon	Q8WXC7	PRR21	2	240982173	227	T	C	76	M	T	benign	DOID:1781 / thyroid cancer/MLT	Gain|Phosphorylation	845	S		NM_001080835/-/['ICGC', 'COSMIC']
NonCanon	Q8WXC7	PRR21	2	240982173	227	T	C	76	M	T	benign	DOID:1793 / pancreatic cancer/MLT	Gain|Phosphorylation	845	S		NM_001080835/-/['TCGA']
NonCanon	Q8WXC7	PRR21	2	240982173	227	T	C	76	M	T	benign	DOID:10283 / prostate cancer/MLT	Gain|Phosphorylation	845	S		NM_001080835/-/['COSMIC']
NonCanon	Q8WXC7	PRR21	2	240982199	201	T	G	67	C	W	benign	DOID:1781 / thyroid cancer/MLT	Gain|Phosphorylation	845	S		NM_001080835/-/['COSMIC', 'ICGC']
NonCanon	Q8WXC7	PRR21	2	240982199	201	T	G	67	C	W	benign	DOID:1612 / breast cancer/MLT	Gain|Phosphorylation	845	S		NM_001080835/-/['COSMIC']
NonCanon	Q8WXC7	PRR21	2	240982201	199	T	C	67	C	R	benign	DOID:1781 / thyroid cancer/MLT	Gain|Phosphorylation	845	S		NM_001080835/-/['ICGC', 'COSMIC']
NonCanon	Q8WXC7	PRR21	2	240982213	187	G	A	63	A	T	possibly damaging	DOID:4159 / skin cancer/MLT	Gain|Phosphorylation	845	S		NM_001080835/-/['TCGA']
NonCanon	Q8WXC7	PRR21	2	240982213	187	G	C	63	A	P	benign	DOID:11054 / urinary bladder cancer/MLT	Gain|Phosphorylation	845	S		NM_001080835/-/['COSMIC', 'ICGC']
NonCanon	Q8WXC7	PRR21	2	240982219	181	T	C	61	S	P	benign	DOID:1781 / thyroid cancer/MLT	Gain|Phosphorylation	845	S		NM_001080835/-/['ICGC', 'COSMIC']
NonCanon	Q8WXC7	PRR21	2	240982219	181	T	C	61	S	P	benign	DOID:263 / kidney cancer/MLT	Gain|Phosphorylation	845	S		NM_001080835/-/['COSMIC', 'ICGC', 'TCGA']
NonCanon	Q8WXC7	PRR21	2	240982219	181	T	C	61	S	P	benign	DOID:8618 / oral cavity cancer/MLT	Gain|Phosphorylation	845	S		NM_001080835/23619168/['COSMIC']
NonCanon	Q8WXC7	PRR21	2	240982221	179	C	T	60	S	L	possibly damaging	DOID:4159 / skin cancer/MLT	-	845	S		NM_001080835/22842228/['COSMIC']
NonCanon	Q8WXC7	PRR21	2	240982228	172	G	A	58	G	S	benign	DOID:1781 / thyroid cancer/MLT	Gain|Phosphorylation	845	S		NM_001080835/-/['ICGC', 'COSMIC']
NonCanon	Q8WXC7	PRR21	2	240982228	172	G	A	58	G	S	benign	DOID:1793 / pancreatic cancer/MLT	Gain|Phosphorylation	845	S		NM_001080835/-/['TCGA']
NonCanon	Q8WXC7	PRR21	2	240982243	157	C	T	53	R	W	benign	DOID:1793 / pancreatic cancer/MLT	Gain|Phosphorylation	845	S		NM_001080835/-/['TCGA']
NonCanon	Q8WXC7	PRR21	2	240982243	157	C	T	53	R	W	benign	DOID:1612 / breast cancer/MLT	Gain|Phosphorylation	845	S		NM_001080835/-/['ICGC', 'TCGA', 'COSMIC']
NonCanon	Q8WXC7	PRR21	2	240982243	157	C	T	53	R	W	benign	DOID:2531 / hematologic cancer/MLT	Gain|Phosphorylation	845	S		NM_001080835/-/['COSMIC']
NonCanon	Q8WXC7	PRR21	2	240982243	157	C	T	53	R	W	benign	DOID:1319 / brain cancer/MLT	Gain|Phosphorylation	845	S		NM_001080835/23917401/['COSMIC']
NonCanon	Q8WXC7	PRR21	2	240982243	157	C	T	53	R	W	benign	DOID:2394 / ovarian cancer/MLT	Gain|Phosphorylation	845	S		NM_001080835/-/['COSMIC']
NonCanon	Q8WXC7	PRR21	2	240982248	152	A	G	51	H	R	benign	DOID:4362 / cervical cancer/MLT	Gain|Phosphorylation	845	S		NM_001080835/-/['TCGA']
NonCanon	Q8WXC7	PRR21	2	240982248	152	A	G	51	H	R	benign	DOID:10283 / prostate cancer/MLT	Gain|Phosphorylation	845	S		NM_001080835/-/['TCGA']
NonCanon	Q8WXC7	PRR21	2	240982255	145	G	T	49	A	S	benign	DOID:4362 / cervical cancer/MLT	Gain|Phosphorylation	845	S		NM_001080835/-/['COSMIC', 'TCGA']
NonCanon	Q8WXC7	PRR21	2	240982257	143	T	C	48	M	T	benign	DOID:1781 / thyroid cancer/MLT	-	845	S		NM_001080835/-/['ICGC', 'COSMIC']
NonCanon	Q8WXC7	PRR21	2	240982257	143	T	C	48	M	T	benign	DOID:4362 / cervical cancer/MLT	-	845	S		NM_001080835/-/['TCGA']
NonCanon	Q8WXC7	PRR21	2	240982270	130	G	A	44	G	S	benign	DOID:4159 / skin cancer/MLT	-	845	S		NM_001080835/-/['ICGC', 'TCGA']
NonCanon	Q8WXC7	PRR21	2	240982275	125	T	C	42	I	T	benign	DOID:1319 / brain cancer/MLT	Gain|Phosphorylation	845	S		NM_001080835/23917401/['COSMIC']
NonCanon	Q8WXC7	PRR21	2	240982283	117	G	T	39	W	C	benign	DOID:1324 / lung cancer/MLT	-	845	S		NM_001080835/-/['IntOGen']
NonCanon	Q8WXC7	PRR21	2	240982285	115	T	C	39	W	R	benign	DOID:4362 / cervical cancer/MLT	-	845	S		NM_001080835/-/['TCGA']
NonCanon	Q8WXC7	PRR21	2	240982289	111	C	A	37	H	Q	benign	DOID:1324 / lung cancer/MLT	Gain|Phosphorylation	845	S		NM_001080835/-/['COSMIC', 'IntOGen']
NonCanon	Q8WXC7	PRR21	2	240982312	88	C	T	30	H	Y	possibly damaging	DOID:1781 / thyroid cancer/MLT	Gain|Phosphorylation	845	S		NM_001080835/23264394/['COSMIC']
NonCanon	Q8WXC7	PRR21	2	240982312	88	C	T	30	H	Y	possibly damaging	DOID:1793 / pancreatic cancer/MLT	Gain|Phosphorylation	845	S		NM_001080835/-/['TCGA']
NonCanon	Q8WXC7	PRR21	2	240982312	88	C	T	30	H	Y	possibly damaging	DOID:4362 / cervical cancer/MLT	Gain|Phosphorylation	845	S		NM_001080835/-/['TCGA']
NonCanon	Q8WXC7	PRR21	2	240982312	88	C	A	30	H	N	benign	DOID:3953 / adrenal gland cancer/MLT	Gain|Glycosylation	845	S		NM_001080835/-/['TCGA']
NonCanon	Q8WXC7	PRR21	2	240982327	73	C	G	25	Q	E	benign	DOID:1612 / breast cancer/MLT	-	845	S		NM_001080835/-/['COSMIC', 'IntOGen', 'ICGC', 'TCGA']
NonCanon	Q8WXC7	PRR21	2	240982362	38	C	T	13	P	L	benign	DOID:1324 / lung cancer/MLT	-	845	S		NM_001080835/22941189/['COSMIC']	NM_001080835/-/['IntOGen']
NonCanon	Q8WXC7	PRR21	2	240982362	38	C	T	13	P	L	benign	DOID:219 / colon cancer/MLT	-	845	S		NM_001080835/-/['COSMIC', 'ICGC', 'TCGA']
NonCanon	Q8WXC7	PRR21	2	240982362	38	C	T	13	P	L	benign	DOID:1793 / pancreatic cancer/MLT	-	845	S		NM_001080835/-/['TCGA']
NonCanon	Q8WXC7	PRR21	2	240982362	38	C	T	13	P	L	benign	DOID:3953 / adrenal gland cancer/MLT	-	845	S		NM_001080835/-/['TCGA']
NonCanon	Q8WXC7	PRR21	2	240982389	11	G	C	4	C	S	possibly damaging	DOID:219 / colon cancer/MLT	-	845	S		NM_001080835/-/['COSMIC', 'ICGC', 'TCGA']
NonCanon	Q8WXC7	PRR21	2	240982389	11	G	C	4	C	S	possibly damaging	DOID:1793 / pancreatic cancer/MLT	-	845	S		NM_001080835/-/['TCGA']
NonCanon	Q8WXC7	PRR21	2	240982389	11	G	C	4	C	S	possibly damaging	DOID:263 / kidney cancer/MLT	-	845	S		NM_001080835/-/['TCGA']
NonCanon	Q8WXC7	PRR21	2	240982389	11	G	C	4	C	S	possibly damaging	DOID:3953 / adrenal gland cancer/MLT	-	845	S		NM_001080835/-/['TCGA']
NonCanon	Q8NGW1	OR6B3	2	240984517	973	C	T	325	Q	X	-	DOID:1324 / lung cancer/MLT	-	845	S		NM_173351/22980975/['COSMIC']
NonCanon	Q8NGW1	OR6B3	2	240984523	967	C	A	323	H	N	benign	DOID:4159 / skin cancer/MLT	Gain|Phosphorylation	845	S		NM_173351/-/['ICGC', 'TCGA']
NonCanon	Q8NGW1	OR6B3	2	240984525	965	T	G	322	L	R	benign	DOID:363 / uterine cancer/MLT	Gain|Phosphorylation	845	S		NM_173351/-/['COSMIC', 'TCGA']
NonCanon	Q8NGW1	OR6B3	2	240984529	961	G	A	321	E	K	benign	DOID:4159 / skin cancer/MLT	-	845	S		NM_173351/-/['ICGC', 'TCGA']
NonCanon	Q8NGW1	OR6B3	2	240984529	961	G	T	321	E	X	-	DOID:1324 / lung cancer/MLT	-	845	S		NM_173351/-/['IntOGen']	NM_173351/22941189/['COSMIC']
NonCanon	Q8NGW1	OR6B3	2	240984558	932	C	T	311	A	V	benign	DOID:4159 / skin cancer/MLT	Gain|Phosphorylation	845	S		NM_173351/-/['TCGA']
NonCanon	Q8NGW1	OR6B3	2	240984574	916	G	A	306	G	S	benign	DOID:4362 / cervical cancer/MLT	-	845	S		NM_173351/-/['TCGA']
NonCanon	Q8NGW1	OR6B3	2	240984579	911	C	T	304	A	V	benign	DOID:363 / uterine cancer/MLT	Gain|Phosphorylation	845	S		NM_173351/-/['IntOGen', 'TCGA', 'COSMIC']
NonCanon	Q8NGW1	OR6B3	2	240984591	899	C	T	300	A	V	probably damaging	DOID:1993 / rectum cancer/MLT	-	845	S		NM_173351/-/['ICGC']
NonCanon	Q8NGW1	OR6B3	2	240984596	894	G	T	298	K	N	probably damaging	DOID:363 / uterine cancer/MLT	-	845	S		NM_173351/-/['TCGA', 'COSMIC']
NonCanon	Q8NGW1	OR6B3	2	240984604	886	G	A	296	E	K	possibly damaging	DOID:4159 / skin cancer/MLT	-	845	S		NM_173351/-/['ICGC', 'TCGA']
NonCanon	Q8NGW1	OR6B3	2	240984637	853	T	G	285	L	V	benign	DOID:5041 / esophageal cancer/MLT	Gain|Phosphorylation	845	S		NM_173351/23525077/['COSMIC']
NonCanon	Q8NGW1	OR6B3	2	240984708	782	G	A	261	R	Q	possibly damaging	DOID:4362 / cervical cancer/MLT	Gain|Phosphorylation	845	S		NM_173351/-/['TCGA']
NonCanon	Q8NGW1	OR6B3	2	240984708	782	G	T	261	R	L	probably damaging	DOID:11934 / head and neck cancer/MLT	Gain|Phosphorylation	845	S		NM_173351/-/['TCGA']
NonCanon	Q8NGW1	OR6B3	2	240984709	781	C	T	261	R	W	possibly damaging	DOID:219 / colon cancer/MLT	Gain|Phosphorylation	845	S		NM_173351/-/['IntOGen']
NonCanon	Q8NGW1	OR6B3	2	240984709	781	C	T	261	R	W	possibly damaging	DOID:1521 / cecum cancer/MLT	Gain|Phosphorylation	845	S		NM_173351/22810696/['COSMIC']
NonCanon	Q8NGW1	OR6B3	2	240984734	756	T	A	252	Y	X	-	DOID:3571 / liver cancer/MLT	-	845	S		NM_173351/23788652/['COSMIC']
NonCanon	Q8NGW1	OR6B3	2	240984737	753	C	A	251	F	L	possibly damaging	DOID:1324 / lung cancer/MLT	-	845	S		NM_173351/-/['IntOGen']
NonCanon	Q8NGW1	OR6B3	2	240984738	752	T	G	251	F	C	benign	DOID:219 / colon cancer/MLT	-	845	S		NM_173351/-/['IntOGen', 'COSMIC']
NonCanon	Q8NGW1	OR6B3	2	240984753	737	C	T	246	T	I	benign	DOID:4159 / skin cancer/MLT	-	845	S		NM_173351/-/['ICGC', 'TCGA']
NonCanon	Q8NGW1	OR6B3	2	240984785	705	G	T	235	W	C	probably damaging	DOID:2394 / ovarian cancer/MLT	Gain|Phosphorylation	845	S		NM_173351/21720365/['COSMIC']	NM_173351/-/['IntOGen']
NonCanon	Q8NGW1	OR6B3	2	240984789	701	G	A	234	C	Y	benign	DOID:219 / colon cancer/MLT	Gain|Phosphorylation	845	S		NM_173351/-/['ICGC', 'COSMIC', 'TCGA']
NonCanon	Q8NGW1	OR6B3	2	240984789	701	G	A	234	C	Y	benign	DOID:1793 / pancreatic cancer/MLT	Gain|Phosphorylation	845	S		NM_173351/-/['TCGA']
NonCanon	Q8NGW1	OR6B3	2	240984793	697	G	A	233	G	S	probably damaging	DOID:263 / kidney cancer/MLT	Gain|Phosphorylation	845	S		NM_173351/-/['TCGA']
NonCanon	Q8NGW1	OR6B3	2	240984805	685	C	T	229	P	S	probably damaging	DOID:1521 / cecum cancer/MLT	Gain|Phosphorylation	845	S		NM_173351/22810696/['COSMIC']
NonCanon	Q8NGW1	OR6B3	2	240984811	679	C	T	227	R	C	benign	DOID:5041 / esophageal cancer/MLT	Gain|Phosphorylation	845	S		NM_173351/23525077/['COSMIC']
NonCanon	Q8NGW1	OR6B3	2	240984826	664	A	C	222	T	P	possibly damaging	DOID:1612 / breast cancer/MLT	Gain|Phosphorylation	845	S		NM_173351/-/['COSMIC', 'ICGC', 'TCGA']
NonCanon	Q8NGW1	OR6B3	2	240984862	628	C	G	210	P	A	probably damaging	DOID:3571 / liver cancer/MLT	-	845	S		NM_173351/-/['TCGA']
NonCanon	Q8NGW1	OR6B3	2	240984886	604	C	G	202	L	V	probably damaging	DOID:11054 / urinary bladder cancer/MLT	-	845	S		NM_173351/-/['COSMIC', 'ICGC', 'TCGA']
NonCanon	Q8NGW1	OR6B3	2	240984909	581	C	T	194	T	I	possibly damaging	DOID:1324 / lung cancer/MLT	-	845	S		NM_173351/-/['COSMIC']
NonCanon	Q8NGW1	OR6B3	2	240985099	391	C	T	131	R	C	benign	DOID:1781 / thyroid cancer/MLT	-	845	S		NM_173351/-/['ICGC', 'COSMIC']
NonCanon	Q8NGW1	OR6B3	2	240985219	271	C	T	91	R	C	benign	DOID:219 / colon cancer/MLT	-	845	S		NM_173351/22810696/['COSMIC']	NM_173351/-/['IntOGen']
NonCanon	Q8NGW1	OR6B3	2	240985219	271	C	T	91	R	C	benign	DOID:1612 / breast cancer/MLT	-	845	S		NM_173351/-/['COSMIC', 'IntOGen', 'ICGC', 'TCGA']
NonCanon	Q8NGW1	OR6B3	2	240985219	271	C	T	91	R	C	benign	DOID:2394 / ovarian cancer/MLT	-	845	S		NM_173351/21720365/['COSMIC']	NM_173351/-/['IntOGen']
NonCanon	Q8NGW1	OR6B3	2	240985226	264	G	T	88	Q	H	benign	DOID:363 / uterine cancer/MLT	-	845	S		NM_173351/-/['COSMIC', 'TCGA']
NonCanon	Q8NGW1	OR6B3	2	240985270	220	G	A	74	V	M	probably damaging	DOID:1319 / brain cancer/MLT	-	845	S		NM_173351/-/['IntOGen']	NM_173351/23917401/['COSMIC']
NonCanon	Q8NGW1	OR6B3	2	240985270	220	G	A	74	V	M	probably damaging	DOID:3070 / malignant glioma/MLT	-	845	S		NM_173351/-/['ICGC', 'TCGA']
NonCanon	Q8NGW1	OR6B3	2	240985276	214	T	A	72	W	R	probably damaging	DOID:1324 / lung cancer/MLT	Gain|Phosphorylation	845	S		NM_173351/-/['COSMIC', 'IntOGen']
NonCanon	Q8NGW1	OR6B3	2	240985276	214	T	C	72	W	R	probably damaging	DOID:219 / colon cancer/MLT	Gain|Phosphorylation	845	S		NM_173351/22810696/['COSMIC']	NM_173351/-/['IntOGen']
NonCanon	Q8NGW1	OR6B3	2	240985294	196	A	C	66	M	L	benign	DOID:219 / colon cancer/MLT	-	845	S		NM_173351/-/['COSMIC', 'ICGC', 'TCGA']
NonCanon	Q8NGW1	OR6B3	2	240985320	170	G	A	57	R	K	benign	DOID:1192 / peripheral nervous system neoplasm/MLT	Gain|Phosphorylation	845	S		NM_173351/23334666/['COSMIC']
NonCanon	Q8NGW1	OR6B3	2	240985329	161	C	T	54	S	F	possibly damaging	DOID:4159 / skin cancer/MLT	Gain|Phosphorylation	845	S		NM_173351/-/['ICGC', 'TCGA']
NonCanon	Q8NGW1	OR6B3	2	240985341	149	G	T	50	W	L	benign	DOID:1324 / lung cancer/MLT	Gain|Phosphorylation	845	S		NM_173351/22980975/['COSMIC']
NonCanon	Q8NGW1	OR6B3	2	240985345	145	G	A	49	V	I	benign	DOID:10283 / prostate cancer/MLT	Gain|Phosphorylation	845	S		NM_173351/22610119/['COSMIC']
NonCanon	Q8NGW1	OR6B3	2	240985347	143	C	T	48	T	I	possibly damaging	DOID:1781 / thyroid cancer/MLT	-	845	S		NM_173351/-/['ICGC', 'COSMIC']
NonCanon	Q8NGW1	OR6B3	2	240985367	123	G	T	41	E	D	probably damaging	DOID:363 / uterine cancer/MLT	Gain|Phosphorylation	845	S		NM_173351/-/['COSMIC', 'TCGA']
NonCanon	Q6P087	RPUSD3	3	9883682	392	T	C	131	V	A	-	DOID:363 / uterine cancer/HML2	-	864	AB		NM_173659/-/['IntOGen', 'COSMIC', 'TCGA']
NonCanon	Q6P087	RPUSD3	3	9883682	347	T	C	116	V	A	-	DOID:363 / uterine cancer/HML2	-	864	AB		NM_001142547/-/['IntOGen', 'COSMIC', 'TCGA']
NonCanon	Q6P087	RPUSD3	3	9883689	340	C	T	114	Q	X	-	DOID:11054 / urinary bladder cancer/HML2	-	864	AB		NM_001142547/-/['COSMIC', 'ICGC']	NM_001142547/24121792/['COSMIC']
NonCanon	Q6P087	RPUSD3	3	9883689	385	C	T	129	Q	X	-	DOID:11054 / urinary bladder cancer/HML2	-	864	AB		NM_173659/-/['COSMIC', 'ICGC']	NM_173659/24121792/['COSMIC']
NonCanon	Q6P087	RPUSD3	3	9883739	335	C	T	112	S	L	-	DOID:4159 / skin cancer/HML2	Gain|Phosphorylation	864	AB		NM_173659/22842228/['COSMIC']
NonCanon	Q6P087	RPUSD3	3	9883739	290	C	T	97	S	L	-	DOID:4159 / skin cancer/HML2	-	864	AB		NM_001142547/22842228/['COSMIC']
NonCanon	Q6P087	RPUSD3	3	9885172	239	G	T	80	R	L	-	DOID:10534 / stomach cancer/HML2	-	864	AB		NM_001142547/-/['TCGA']	NM_173659/-/['TCGA']
NonCanon	Q6P087	RPUSD3	3	9885265	146	G	T	49	G	V	-	DOID:8618 / oral cavity cancer/HML2	Gain|Phosphorylation	864	AB		NM_001142547/24292195/['COSMIC']	NM_173659/-/['ICGC']	NM_173659/24292195/['COSMIC']	NM_001142547/-/['ICGC']
NonCanon	Q6P087	RPUSD3	3	9885632	67	C	G	23	R	G	-	DOID:3571 / liver cancer/HML2	Gain|Phosphorylation	864	AB		NM_173659/-/['COSMIC', 'ICGC']	NM_001142547/-/['COSMIC', 'ICGC']
NonCanon	Q6P087	RPUSD3	3	9885638	61	G	T	21	G	C	probably damaging	DOID:2531 / hematologic cancer/HML2	-	864	AB		NM_001142547/23856246/['COSMIC']	NM_173659/23856246/['COSMIC']
NonCanon	Q8N9V7	TOPAZ1	3	44373301	4877	C	T	1626	S	F	possibly damaging	DOID:1909 / melanoma/MER84	-	934	GE	MER50like	NM_001145030/-/['ClinVar']
NonCanon	Q8N9V7	TOPAZ1	3	44373333	4909	G	A	1637	E	K	benign	DOID:1612 / breast cancer/MER84	Gain|Phosphorylation	934	GE	MER50like	NM_001145030/-/['COSMIC', 'IntOGen', 'ICGC', 'TCGA']
NonCanon	Q8N9V7	TOPAZ1	3	44373349	4925	C	T	1642	A	V	probably damaging	DOID:219 / colon cancer/MER84	-	934	GE	MER50like	NM_001145030/-/['COSMIC', 'ICGC', 'TCGA']
NonCanon	Q8N9V7	TOPAZ1	3	44373351	4927	G	T	1643	A	S	probably damaging	DOID:8618 / oral cavity cancer/MER84	-	934	GE	MER50like	NM_001145030/-/['ICGC']	NM_001145030/24292195/['COSMIC']
NonCanon	Q8N9V7	TOPAZ1	3	44373352	4928	C	G	1643	A	G	probably damaging	DOID:1521 / cecum cancer/MER84	-	934	GE	MER50like	NM_001145030/-/['COSMIC']
NonCanon	Q8N9V7	TOPAZ1	3	44373384	4960	C	T	1654	H	Y	possibly damaging	DOID:219 / colon cancer/MER84	Gain|Phosphorylation	934	GE	MER50like	NM_001145030/22895193/['COSMIC']
NonCanon	Q8N9V7	TOPAZ1	3	44373423	4999	T	G	1667	L	V	probably damaging	DOID:363 / uterine cancer/MER84	-	934	GE	MER50like	NM_001145030/-/['COSMIC', 'TCGA']
NonCanon	Q8N9V7	TOPAZ1	3	44373458	5034	G	T	1678	E	D	probably damaging	DOID:363 / uterine cancer/MER84	-	934	GE	MER50like	NM_001145030/-/['TCGA', 'COSMIC']
NonCanon	P0C7L1	SPINK8	3	48369795	37	G	A	13	A	T	benign	DOID:1192 / peripheral nervous system neoplasm/HERVW	-	946	GE	HERVW9	NM_001080525/22367537/['COSMIC']
NonCanon	P0C7L1	SPINK8	3	48369810	22	G	A	8	A	T	benign	DOID:10534 / stomach cancer/HERVW	Gain|Phosphorylation	946	GE	HERVW9	NM_001080525/-/['ICGC', 'TCGA']
NonCanon	P62633	CNBP	3	128889301	529	G	A	177	A	T	benign	DOID:263 / kidney cancer/ERRANTI	-	1114	Uncertain Errantivirus like proviruses		NM_003418/-/['COSMIC', 'TCGA']
NonCanon	P62633	CNBP	3	128889318	512	G	T	171	C	F	probably damaging	DOID:363 / uterine cancer/ERRANTI	-	1114	Uncertain Errantivirus like proviruses		NM_003418/-/['COSMIC', 'TCGA']
NonCanon	P62633	CNBP	3	128889318	491	G	T	164	C	F	probably damaging	DOID:363 / uterine cancer/ERRANTI	-	1114	Uncertain Errantivirus like proviruses		NM_001127196/-/['COSMIC', 'TCGA']
NonCanon	P62633	CNBP	3	128889318	515	G	T	172	C	F	probably damaging	DOID:363 / uterine cancer/ERRANTI	-	1114	Uncertain Errantivirus like proviruses		NM_001127193/-/['COSMIC', 'TCGA']
NonCanon	P62633	CNBP	3	128889318	497	G	T	166	C	F	probably damaging	DOID:363 / uterine cancer/ERRANTI	-	1114	Uncertain Errantivirus like proviruses		NM_001127194/-/['COSMIC', 'TCGA']
NonCanon	P62633	CNBP	3	128889318	518	G	T	173	C	F	probably damaging	DOID:363 / uterine cancer/ERRANTI	-	1114	Uncertain Errantivirus like proviruses		NM_001127192/-/['COSMIC', 'TCGA']
NonCanon	P62633	CNBP	3	128889318	494	G	T	165	C	F	probably damaging	DOID:363 / uterine cancer/ERRANTI	-	1114	Uncertain Errantivirus like proviruses		NM_001127195/-/['COSMIC', 'TCGA']
NonCanon	P62633	CNBP	3	128889366	443	A	G	148	E	G	possibly damaging	DOID:3953 / adrenal gland cancer/ERRANTI	-	1114	Uncertain Errantivirus like proviruses		NM_001127196/-/['TCGA']
NonCanon	P62633	CNBP	3	128889366	464	A	G	155	E	G	possibly damaging	DOID:3953 / adrenal gland cancer/ERRANTI	-	1114	Uncertain Errantivirus like proviruses		NM_003418/-/['TCGA']
NonCanon	P62633	CNBP	3	128889366	470	A	G	157	E	G	possibly damaging	DOID:3953 / adrenal gland cancer/ERRANTI	-	1114	Uncertain Errantivirus like proviruses		NM_001127192/-/['TCGA']
NonCanon	P62633	CNBP	3	128889366	467	A	G	156	E	G	possibly damaging	DOID:3953 / adrenal gland cancer/ERRANTI	-	1114	Uncertain Errantivirus like proviruses		NM_001127193/-/['TCGA']
NonCanon	P62633	CNBP	3	128889366	446	A	G	149	E	G	possibly damaging	DOID:3953 / adrenal gland cancer/ERRANTI	-	1114	Uncertain Errantivirus like proviruses		NM_001127195/-/['TCGA']
NonCanon	P62633	CNBP	3	128889366	449	A	G	150	E	G	possibly damaging	DOID:3953 / adrenal gland cancer/ERRANTI	-	1114	Uncertain Errantivirus like proviruses		NM_001127194/-/['TCGA']
NonCanon	P62633	CNBP	3	128889402	434	C	G	145	T	S	benign	DOID:1781 / thyroid cancer/ERRANTI	-	1114	Uncertain Errantivirus like proviruses		NM_001127192/-/['ICGC', 'COSMIC']
NonCanon	P62633	CNBP	3	128889402	431	C	G	144	T	S	benign	DOID:1781 / thyroid cancer/ERRANTI	-	1114	Uncertain Errantivirus like proviruses		NM_001127193/-/['ICGC', 'COSMIC']
NonCanon	P62633	CNBP	3	128889402	407	C	G	136	T	S	benign	DOID:1781 / thyroid cancer/ERRANTI	-	1114	Uncertain Errantivirus like proviruses		NM_001127196/-/['ICGC', 'COSMIC']
NonCanon	P62633	CNBP	3	128889402	428	C	G	143	T	S	benign	DOID:1781 / thyroid cancer/ERRANTI	-	1114	Uncertain Errantivirus like proviruses		NM_003418/-/['ICGC', 'COSMIC']
NonCanon	P62633	CNBP	3	128889402	410	C	G	137	T	S	benign	DOID:1781 / thyroid cancer/ERRANTI	-	1114	Uncertain Errantivirus like proviruses		NM_001127195/-/['ICGC', 'COSMIC']
NonCanon	P62633	CNBP	3	128889402	413	C	G	138	T	S	benign	DOID:1781 / thyroid cancer/ERRANTI	-	1114	Uncertain Errantivirus like proviruses		NM_001127194/-/['ICGC', 'COSMIC']
NonCanon	P62633	CNBP	3	128889940	383	C	T	128	T	I	probably damaging	DOID:1793 / pancreatic cancer/ERRANTI	-	1114	Uncertain Errantivirus like proviruses		NM_001127194/-/['TCGA']
NonCanon	P62633	CNBP	3	128889940	404	C	T	135	T	I	probably damaging	DOID:1793 / pancreatic cancer/ERRANTI	-	1114	Uncertain Errantivirus like proviruses		NM_001127192/-/['TCGA']
NonCanon	P62633	CNBP	3	128889940	380	C	T	127	T	I	probably damaging	DOID:1793 / pancreatic cancer/ERRANTI	-	1114	Uncertain Errantivirus like proviruses		NM_001127195/-/['TCGA']
NonCanon	P62633	CNBP	3	128889940	377	C	T	126	T	I	probably damaging	DOID:1793 / pancreatic cancer/ERRANTI	-	1114	Uncertain Errantivirus like proviruses		NM_001127196/-/['TCGA']
NonCanon	P62633	CNBP	3	128889940	401	C	T	134	T	I	probably damaging	DOID:1793 / pancreatic cancer/ERRANTI	-	1114	Uncertain Errantivirus like proviruses		NM_001127193/-/['TCGA']
NonCanon	P62633	CNBP	3	128889940	398	C	T	133	T	I	probably damaging	DOID:1793 / pancreatic cancer/ERRANTI	-	1114	Uncertain Errantivirus like proviruses		NM_003418/-/['TCGA']
NonCanon	P62633	CNBP	3	128889962	379	G	A	127	G	R	probably damaging	DOID:363 / uterine cancer/ERRANTI	-	1114	Uncertain Errantivirus like proviruses		NM_001127193/-/['TCGA', 'COSMIC']
NonCanon	P62633	CNBP	3	128889962	376	G	A	126	G	R	probably damaging	DOID:363 / uterine cancer/ERRANTI	Gain|Phosphorylation	1114	Uncertain Errantivirus like proviruses		NM_003418/-/['TCGA', 'COSMIC']
NonCanon	P62633	CNBP	3	128889962	355	G	A	119	G	R	probably damaging	DOID:363 / uterine cancer/ERRANTI	-	1114	Uncertain Errantivirus like proviruses		NM_001127196/-/['TCGA', 'COSMIC']
NonCanon	P62633	CNBP	3	128889962	358	G	A	120	G	R	probably damaging	DOID:363 / uterine cancer/ERRANTI	-	1114	Uncertain Errantivirus like proviruses		NM_001127195/-/['TCGA', 'COSMIC']
NonCanon	P62633	CNBP	3	128889962	382	G	A	128	G	R	probably damaging	DOID:363 / uterine cancer/ERRANTI	-	1114	Uncertain Errantivirus like proviruses		NM_001127192/-/['TCGA', 'COSMIC']
NonCanon	P62633	CNBP	3	128889962	361	G	A	121	G	R	probably damaging	DOID:363 / uterine cancer/ERRANTI	-	1114	Uncertain Errantivirus like proviruses		NM_001127194/-/['TCGA', 'COSMIC']
NonCanon	P62633	CNBP	3	128889976	341	C	T	114	S	F	probably damaging	DOID:4607 / biliary tract cancer/ERRANTI	-	1114	Uncertain Errantivirus like proviruses		NM_001127196/22561520/['COSMIC']
NonCanon	P62633	CNBP	3	128889976	344	C	T	115	S	F	probably damaging	DOID:4607 / biliary tract cancer/ERRANTI	-	1114	Uncertain Errantivirus like proviruses		NM_001127195/22561520/['COSMIC']
NonCanon	P62633	CNBP	3	128889976	362	C	T	121	S	F	probably damaging	DOID:4607 / biliary tract cancer/ERRANTI	-	1114	Uncertain Errantivirus like proviruses		NM_003418/22561520/['COSMIC']
NonCanon	P62633	CNBP	3	128889976	368	C	T	123	S	F	probably damaging	DOID:4607 / biliary tract cancer/ERRANTI	-	1114	Uncertain Errantivirus like proviruses		NM_001127192/22561520/['COSMIC']
NonCanon	P62633	CNBP	3	128889976	347	C	T	116	S	F	probably damaging	DOID:4607 / biliary tract cancer/ERRANTI	-	1114	Uncertain Errantivirus like proviruses		NM_001127194/22561520/['COSMIC']
NonCanon	P62633	CNBP	3	128889976	365	C	T	122	S	F	probably damaging	DOID:4607 / biliary tract cancer/ERRANTI	-	1114	Uncertain Errantivirus like proviruses		NM_001127193/22561520/['COSMIC']
NonCanon	P62633	CNBP	3	128890058	265	C	T	89	R	X	-	DOID:363 / uterine cancer/ERRANTI	-	1114	Uncertain Errantivirus like proviruses		NM_001127194/-/['TCGA', 'COSMIC']
NonCanon	P62633	CNBP	3	128890058	262	C	T	88	R	X	-	DOID:363 / uterine cancer/ERRANTI	-	1114	Uncertain Errantivirus like proviruses		NM_001127195/-/['TCGA', 'COSMIC']
NonCanon	P62633	CNBP	3	128890058	280	C	T	94	R	X	-	DOID:363 / uterine cancer/ERRANTI	-	1114	Uncertain Errantivirus like proviruses		NM_003418/-/['TCGA', 'COSMIC']
NonCanon	P62633	CNBP	3	128890058	259	C	T	87	R	X	-	DOID:363 / uterine cancer/ERRANTI	-	1114	Uncertain Errantivirus like proviruses		NM_001127196/-/['TCGA', 'COSMIC']
NonCanon	P62633	CNBP	3	128890058	286	C	T	96	R	X	-	DOID:363 / uterine cancer/ERRANTI	-	1114	Uncertain Errantivirus like proviruses		NM_001127192/-/['TCGA', 'COSMIC']
NonCanon	P62633	CNBP	3	128890058	283	C	T	95	R	X	-	DOID:363 / uterine cancer/ERRANTI	-	1114	Uncertain Errantivirus like proviruses		NM_001127193/-/['TCGA', 'COSMIC']
NonCanon	P62633	CNBP	3	128890099	218	G	A	73	G	D	possibly damaging	DOID:219 / colon cancer/ERRANTI	-	1114	Uncertain Errantivirus like proviruses		NM_001127196/-/['COSMIC', 'ICGC', 'TCGA']
NonCanon	P62633	CNBP	3	128890099	221	G	A	74	G	D	possibly damaging	DOID:219 / colon cancer/ERRANTI	-	1114	Uncertain Errantivirus like proviruses		NM_001127195/-/['COSMIC', 'ICGC', 'TCGA']
NonCanon	P62633	CNBP	3	128890099	245	G	A	82	G	D	possibly damaging	DOID:219 / colon cancer/ERRANTI	-	1114	Uncertain Errantivirus like proviruses		NM_001127192/-/['COSMIC', 'ICGC', 'TCGA']
NonCanon	P62633	CNBP	3	128890099	224	G	A	75	G	D	possibly damaging	DOID:219 / colon cancer/ERRANTI	-	1114	Uncertain Errantivirus like proviruses		NM_001127194/-/['COSMIC', 'ICGC', 'TCGA']
NonCanon	P62633	CNBP	3	128890099	239	G	A	80	G	D	possibly damaging	DOID:219 / colon cancer/ERRANTI	-	1114	Uncertain Errantivirus like proviruses		NM_003418/-/['COSMIC', 'ICGC', 'TCGA']
NonCanon	P62633	CNBP	3	128890099	242	G	A	81	G	D	possibly damaging	DOID:219 / colon cancer/ERRANTI	-	1114	Uncertain Errantivirus like proviruses		NM_001127193/-/['COSMIC', 'ICGC', 'TCGA']
NonCanon	P62633	CNBP	3	128890121	202	G	T	68	A	S	-	DOID:363 / uterine cancer/ERRANTI	-	1114	Uncertain Errantivirus like proviruses		NM_001127194/-/['TCGA']
NonCanon	P62633	CNBP	3	128890121	223	G	T	75	A	S	-	DOID:363 / uterine cancer/ERRANTI	-	1114	Uncertain Errantivirus like proviruses		NM_001127192/-/['TCGA']
NonCanon	P62633	CNBP	3	128890121	220	G	T	74	A	S	-	DOID:363 / uterine cancer/ERRANTI	-	1114	Uncertain Errantivirus like proviruses		NM_001127193/-/['TCGA']
NonCanon	P62633	CNBP	3	128890121	199	G	T	67	A	S	-	DOID:363 / uterine cancer/ERRANTI	-	1114	Uncertain Errantivirus like proviruses		NM_001127195/-/['TCGA']
NonCanon	P62633	CNBP	3	128890336	170	G	T	57	C	F	probably damaging	DOID:1324 / lung cancer/ERRANTI	-	1114	Uncertain Errantivirus like proviruses		NM_001127192/22975805/['COSMIC']	NM_001127193/22975805/['COSMIC']	NM_003418/22975805/['COSMIC']
NonCanon	P62633	CNBP	3	128890336	149	G	T	50	C	F	probably damaging	DOID:1324 / lung cancer/ERRANTI	-	1114	Uncertain Errantivirus like proviruses		NM_001127196/22975805/['COSMIC']	NM_001127194/22975805/['COSMIC']	NM_001127195/22975805/['COSMIC']
NonCanon	P62633	CNBP	3	128890358	127	C	G	43	L	V	possibly damaging	DOID:1319 / brain cancer/ERRANTI	-	1114	Uncertain Errantivirus like proviruses		NM_001127195/23104868/['COSMIC']	NM_001127196/23104868/['COSMIC']	NM_001127194/23104868/['COSMIC']
NonCanon	P62633	CNBP	3	128890358	148	C	G	50	L	V	possibly damaging	DOID:1319 / brain cancer/ERRANTI	-	1114	Uncertain Errantivirus like proviruses		NM_001127192/23104868/['COSMIC']	NM_001127193/23104868/['COSMIC']	NM_003418/23104868/['COSMIC']
NonCanon	P62633	CNBP	3	128890366	140	C	T	47	S	F	benign	DOID:4159 / skin cancer/ERRANTI	Loss|Phosphorylation	1114	Uncertain Errantivirus like proviruses		NM_001127193/-/['ICGC', 'TCGA']	NM_003418/-/['ICGC', 'TCGA']	NM_001127192/-/['ICGC', 'TCGA']
NonCanon	P62633	CNBP	3	128890366	119	C	T	40	S	F	benign	DOID:4159 / skin cancer/ERRANTI	-	1114	Uncertain Errantivirus like proviruses		NM_001127195/-/['ICGC', 'TCGA']	NM_001127194/-/['ICGC', 'TCGA']	NM_001127196/-/['ICGC', 'TCGA']
NonCanon	P62633	CNBP	3	128890513	88	A	T	30	R	X	-	DOID:3571 / liver cancer/ERRANTI	-	1114	Uncertain Errantivirus like proviruses		NM_001127196/-/['TCGA']	NM_001127194/-/['TCGA']	NM_003418/-/['TCGA']	NM_001127195/-/['TCGA']
NonCanon	P62633	CNBP	3	128890519	82	G	T	28	G	X	-	DOID:10534 / stomach cancer/ERRANTI	-	1114	Uncertain Errantivirus like proviruses		NM_001127194/-/['ICGC', 'TCGA']	NM_001127195/-/['ICGC', 'TCGA']	NM_001127192/-/['ICGC', 'TCGA']	NM_001127196/-/['ICGC', 'TCGA']
NonCanon	P62633	CNBP	3	128890570	31	C	T	11	R	X	-	DOID:1793 / pancreatic cancer/ERRANTI	-	1114	Uncertain Errantivirus like proviruses		NM_001127192/-/['TCGA']	NM_001127193/-/['TCGA']	NM_003418/-/['TCGA']	NM_001127195/-/['TCGA']
NonCanon	P62633	CNBP	3	128890588	13	G	A	5	E	K	possibly damaging	DOID:11934 / head and neck cancer/ERRANTI	Gain|Phosphorylation	1114	Uncertain Errantivirus like proviruses		NM_001127192/-/['TCGA']	NM_001127195/-/['TCGA']	NM_003418/-/['TCGA']	NM_001127196/-/['TCGA']
NonCanon	Q86X83	COMMD2	3	149470050	92	C	T	31	A	V	probably damaging	DOID:11934 / head and neck cancer/HERVW	-	1168	GE	HERVW9	NM_016094/-/['TCGA']
NonCanon	Q86X83	COMMD2	3	149470069	73	G	A	25	A	T	benign	DOID:3571 / liver cancer/HERVW	-	1168	GE	HERVW9	NM_016094/-/['COSMIC', 'ICGC']
NonCanon	Q86X83	COMMD2	3	149470213	19	G	A	7	E	K	benign	DOID:11054 / urinary bladder cancer/HERVW	-	1168	GE	HERVW9	NM_016094/-/['COSMIC', 'ICGC']	NM_016094/24121792/['COSMIC']
NonCanon	P04196	HRG	3	186383826	6	G	T	2	K	N	probably damaging	DOID:1324 / lung cancer/HERVH	-	1262	GE	HERVHF	NM_000412/-/['COSMIC', 'IntOGen', 'ICGC', 'TCGA']
NonCanon	P04196	HRG	3	186383833	13	A	G	5	I	V	benign	DOID:3571 / liver cancer/HERVH	-	1262	GE	HERVHF	NM_000412/-/['TCGA']
NonCanon	P04196	HRG	3	186383867	47	C	T	16	S	L	probably damaging	DOID:219 / colon cancer/HERVH	Gain|Phosphorylation	1262	GE	HERVHF	NM_000412/-/['COSMIC']
NonCanon	P04196	HRG	3	186383882	62	C	T	21	P	L	probably damaging	DOID:4159 / skin cancer/HERVH	Gain|Phosphorylation	1262	GE	HERVHF	NM_000412/-/['ICGC', 'TCGA']
NonCanon	P04196	HRG	3	186383944	124	C	T	42	R	X	-	DOID:11054 / urinary bladder cancer/HERVH	-	1262	GE	HERVHF	NM_000412/-/['COSMIC', 'IntOGen', 'ICGC', 'TCGA']
NonCanon	P04196	HRG	3	186383947	127	C	T	43	R	W	benign	DOID:10534 / stomach cancer/HERVH	-	1262	GE	HERVHF	NM_000412/-/['IntOGen']	NM_000412/22037554/['COSMIC']
NonCanon	P04196	HRG	3	186383948	128	G	A	43	R	Q	probably damaging	DOID:5041 / esophageal cancer/HERVH	-	1262	GE	HERVHF	NM_000412/-/['COSMIC', 'ICGC']
NonCanon	P04196	HRG	3	186383957	137	A	T	46	Y	F	possibly damaging	DOID:263 / kidney cancer/HERVH	-	1262	GE	HERVHF	NM_000412/-/['ICGC', 'TCGA']
NonCanon	P04196	HRG	3	186383974	154	C	T	52	R	W	possibly damaging	DOID:1612 / breast cancer/HERVH	-	1262	GE	HERVHF	NM_000412/-/['COSMIC', 'IntOGen', 'ICGC', 'TCGA']
NonCanon	P04196	HRG	3	186383975	155	G	A	52	R	Q	possibly damaging	DOID:4159 / skin cancer/HERVH	-	1262	GE	HERVHF	NM_000412/-/['ICGC', 'TCGA']
NonCanon	P04196	HRG	3	186383975	155	G	A	52	R	Q	possibly damaging	DOID:10534 / stomach cancer/HERVH	-	1262	GE	HERVHF	NM_000412/-/['ICGC', 'TCGA']
NonCanon	P04196	HRG	3	186386734	194	C	A	65	T	N	probably damaging	DOID:363 / uterine cancer/HERVH	Loss|+2 from N-linked Glycosylation	1262	GE	HERVHF	NM_000412/-/['COSMIC', 'TCGA']
NonCanon	P04196	HRG	3	186386776	236	C	T	79	S	L	benign	DOID:219 / colon cancer/HERVH	-	1262	GE	HERVHF	NM_000412/-/['ICGC', 'COSMIC', 'TCGA']
NonCanon	P04196	HRG	3	186386805	265	T	C	89	C	R	probably damaging	DOID:11934 / head and neck cancer/HERVH	Gain|Phosphorylation	1262	GE	HERVHF	NM_000412/-/['TCGA']
NonCanon	P04196	HRG	3	186386805	265	T	C	89	C	R	probably damaging	DOID:0060119 / pharynx cancer/HERVH	Gain|Phosphorylation	1262	GE	HERVHF	NM_000412/-/['IntOGen']
NonCanon	P04196	HRG	3	186386808	268	G	C	90	E	Q	possibly damaging	DOID:3953 / adrenal gland cancer/HERVH	-	1262	GE	HERVHF	NM_000412/-/['TCGA']
NonCanon	P04196	HRG	3	186386826	286	C	T	96	R	C	probably damaging	DOID:1521 / cecum cancer/HERVH	Gain|Phosphorylation	1262	GE	HERVHF	NM_000412/22810696/['COSMIC']
NonCanon	P04196	HRG	3	186386829	289	C	T	97	P	S	benign	DOID:3571 / liver cancer/HERVH	-	1262	GE	HERVHF	NM_000412/-/['COSMIC', 'ICGC']
NonCanon	O60760	HPGDS	4	95220653	578	G	A	193	R	Q	benign	DOID:4159 / skin cancer/HERVH	-	1520	GE	HERVHF	NM_014485/22842228/['COSMIC']	NM_014485/-/['ICGC', 'TCGA']
NonCanon	O60760	HPGDS	4	95220654	577	C	T	193	R	X	-	DOID:10534 / stomach cancer/HERVH	-	1520	GE	HERVHF	NM_014485/-/['ICGC', 'TCGA']
NonCanon	O60760	HPGDS	4	95220656	575	A	G	192	K	R	benign	DOID:10534 / stomach cancer/HERVH	-	1520	GE	HERVHF	NM_014485/-/['ICGC', 'TCGA']
NonCanon	O60760	HPGDS	4	95220672	559	G	A	187	V	I	benign	DOID:1793 / pancreatic cancer/HERVH	-	1520	GE	HERVHF	NM_014485/-/['TCGA']
NonCanon	O60760	HPGDS	4	95220689	542	T	C	181	V	A	probably damaging	DOID:11054 / urinary bladder cancer/HERVH	-	1520	GE	HERVHF	NM_014485/-/['COSMIC', 'ICGC']
NonCanon	Q96N64	PWWP2A	5	159545812	584	G	C	195	R	T	probably damaging	DOID:2394 / ovarian cancer/MLT	Gain|Phosphorylation	2030	S		NM_001267035/-/['COSMIC', 'ICGC']	NM_001130864/-/['COSMIC', 'ICGC']	NM_052927/-/['COSMIC', 'ICGC']
NonCanon	Q96N64	PWWP2A	5	159545831	565	C	A	189	L	I	probably damaging	DOID:10534 / stomach cancer/MLT	Gain|Phosphorylation	2030	S		NM_001130864/-/['ICGC', 'TCGA']	NM_052927/-/['ICGC', 'TCGA']	NM_001267035/-/['ICGC', 'TCGA']
NonCanon	Q96N64	PWWP2A	5	159545864	532	T	A	178	F	I	probably damaging	DOID:0060119 / pharynx cancer/MLT	-	2030	S		NM_052927/-/['IntOGen']	NM_001130864/-/['IntOGen']	NM_001267035/-/['IntOGen']
NonCanon	Q96N64	PWWP2A	5	159545864	532	T	A	178	F	I	probably damaging	DOID:8618 / oral cavity cancer/MLT	-	2030	S		NM_052927/21798893/['COSMIC']	NM_001130864/21798893/['COSMIC']	NM_001267035/21798893/['COSMIC']
NonCanon	Q96N64	PWWP2A	5	159545930	466	C	G	156	L	V	probably damaging	DOID:2531 / hematologic cancer/MLT	Gain|Phosphorylation	2030	S		NM_001267035/-/['COSMIC', 'ICGC']	NM_001130864/-/['COSMIC', 'ICGC']	NM_052927/-/['COSMIC', 'ICGC']
NonCanon	Q96N64	PWWP2A	5	159546002	394	G	A	132	E	K	benign	DOID:1793 / pancreatic cancer/MLT	-	2030	S		NM_001267035/-/['TCGA']	NM_052927/-/['TCGA']	NM_001130864/-/['TCGA']
NonCanon	Q96N64	PWWP2A	5	159546013	383	A	G	128	E	G	benign	DOID:1612 / breast cancer/MLT	-	2030	S		NM_001267035/-/['COSMIC']	NM_052927/-/['COSMIC']	NM_001130864/-/['COSMIC']
Canon	P60508	ERVFRD-1	6	11103941	1603	G	T	535	E	X	-	DOID:363 / uterine cancer/HERVFRD	-	2073	GE	HERVFRDLIKE	NM_207582/-/['TCGA', 'COSMIC']
Canon	P60508	ERVFRD-1	6	11103979	1565	C	A	522	T	K	benign	DOID:1612 / breast cancer/HERVFRD	-	2073	GE	HERVFRDLIKE	NM_207582/-/['IntOGen', 'ICGC', 'COSMIC', 'TCGA']
Canon	P60508	ERVFRD-1	6	11104045	1499	G	A	500	G	D	probably damaging	DOID:363 / uterine cancer/HERVFRD	-	2073	GE	HERVFRDLIKE	NM_207582/-/['COSMIC', 'TCGA']
Canon	P60508	ERVFRD-1	6	11104117	1427	C	A	476	T	N	probably damaging	DOID:1324 / lung cancer/HERVFRD	-	2073	GE	HERVFRDLIKE	NM_207582/22980975/['COSMIC']
Canon	P60508	ERVFRD-1	6	11104151	1393	C	T	465	R	X	-	DOID:363 / uterine cancer/HERVFRD	-	2073	GE	HERVFRDLIKE	NM_207582/-/['IntOGen', 'TCGA', 'COSMIC']
Canon	P60508	ERVFRD-1	6	11104238	1306	G	T	436	E	X	-	DOID:1993 / rectum cancer/HERVFRD	-	2073	GE	HERVFRDLIKE	NM_207582/-/['ICGC', 'TCGA', 'COSMIC']
Canon	P60508	ERVFRD-1	6	11104270	1274	C	A	425	A	E	probably damaging	DOID:4362 / cervical cancer/HERVFRD	-	2073	GE	HERVFRDLIKE	NM_207582/-/['TCGA']
Canon	P60508	ERVFRD-1	6	11104343	1201	A	T	401	T	S	benign	DOID:363 / uterine cancer/HERVFRD	Gain|Phosphorylation	2073	GE	HERVFRDLIKE	NM_207582/-/['COSMIC', 'TCGA']
Canon	P60508	ERVFRD-1	6	11104621	923	G	T	308	C	F	possibly damaging	DOID:10534 / stomach cancer/HERVFRD	-	2073	GE	HERVFRDLIKE	NM_207582/-/['COSMIC', 'ICGC']
Canon	P60508	ERVFRD-1	6	11104655	889	G	T	297	A	S	benign	DOID:363 / uterine cancer/HERVFRD	Gain|Phosphorylation	2073	GE	HERVFRDLIKE	NM_207582/-/['TCGA', 'COSMIC']
Canon	P60508	ERVFRD-1	6	11104838	706	T	C	236	S	P	benign	DOID:3571 / liver cancer/HERVFRD	-	2073	GE	HERVFRDLIKE	NM_207582/-/['TCGA']
Canon	P60508	ERVFRD-1	6	11104843	701	G	A	234	R	Q	probably damaging	DOID:10534 / stomach cancer/HERVFRD	Gain|Phosphorylation	2073	GE	HERVFRDLIKE	NM_207582/-/['ICGC', 'TCGA']
Canon	P60508	ERVFRD-1	6	11104843	701	G	A	234	R	Q	probably damaging	DOID:1993 / rectum cancer/HERVFRD	Gain|Phosphorylation	2073	GE	HERVFRDLIKE	NM_207582/-/['COSMIC', 'ICGC', 'TCGA']
Canon	P60508	ERVFRD-1	6	11104843	701	G	A	234	R	Q	probably damaging	DOID:4159 / skin cancer/HERVFRD	Gain|Phosphorylation	2073	GE	HERVFRDLIKE	NM_207582/-/['ICGC', 'TCGA']
Canon	P60508	ERVFRD-1	6	11104868	676	G	A	226	E	K	benign	DOID:1993 / rectum cancer/HERVFRD	Gain|Phosphorylation	2073	GE	HERVFRDLIKE	NM_207582/-/['COSMIC', 'ICGC', 'TCGA']
Canon	P60508	ERVFRD-1	6	11104926	618	G	T	206	W	C	benign	DOID:1324 / lung cancer/HERVFRD	-	2073	GE	HERVFRDLIKE	NM_207582/-/['COSMIC']
Canon	P60508	ERVFRD-1	6	11104936	608	G	A	203	R	Q	probably damaging	DOID:219 / colon cancer/HERVFRD	-	2073	GE	HERVFRDLIKE	NM_207582/22810696/['COSMIC']
Canon	P60508	ERVFRD-1	6	11104936	608	G	A	203	R	Q	probably damaging	DOID:1612 / breast cancer/HERVFRD	-	2073	GE	HERVFRDLIKE	NM_207582/-/['ICGC', 'COSMIC', 'TCGA']
Canon	P60508	ERVFRD-1	6	11104936	608	G	A	203	R	Q	probably damaging	DOID:4159 / skin cancer/HERVFRD	-	2073	GE	HERVFRDLIKE	NM_207582/-/['ICGC', 'TCGA']
Canon	P60508	ERVFRD-1	6	11104942	602	G	A	201	S	N	possibly damaging	DOID:263 / kidney cancer/HERVFRD	-	2073	GE	HERVFRDLIKE	NM_207582/-/['IntOGen', 'ICGC', 'COSMIC', 'TCGA']
Canon	P60508	ERVFRD-1	6	11104970	574	T	G	192	F	V	benign	DOID:219 / colon cancer/HERVFRD	-	2073	GE	HERVFRDLIKE	NM_207582/-/['COSMIC', 'ICGC', 'TCGA']
Canon	P60508	ERVFRD-1	6	11104972	572	G	A	191	R	Q	possibly damaging	DOID:4159 / skin cancer/HERVFRD	-	2073	GE	HERVFRDLIKE	NM_207582/-/['ICGC', 'TCGA']
Canon	P60508	ERVFRD-1	6	11105000	544	C	T	182	Q	X	-	DOID:8618 / oral cavity cancer/HERVFRD	-	2073	GE	HERVFRDLIKE	NM_207582/23619168/['COSMIC']
Canon	P60508	ERVFRD-1	6	11105000	544	C	T	182	Q	X	-	DOID:11934 / head and neck cancer/HERVFRD	-	2073	GE	HERVFRDLIKE	NM_207582/-/['TCGA']
Canon	P60508	ERVFRD-1	6	11105000	544	C	T	182	Q	X	-	DOID:0060119 / pharynx cancer/HERVFRD	-	2073	GE	HERVFRDLIKE	NM_207582/-/['IntOGen']
Canon	P60508	ERVFRD-1	6	11105009	535	A	C	179	T	P	probably damaging	DOID:2394 / ovarian cancer/HERVFRD	Loss|+2 from N-linked Glycosylation	2073	GE	HERVFRDLIKE	NM_207582/-/['IntOGen']	NM_207582/21720365/['COSMIC']
Canon	P60508	ERVFRD-1	6	11105044	500	G	A	167	R	H	benign	DOID:10534 / stomach cancer/HERVFRD	-	2073	GE	HERVFRDLIKE	NM_207582/-/['ICGC', 'TCGA']
Canon	P60508	ERVFRD-1	6	11105116	428	C	A	143	T	K	benign	DOID:10534 / stomach cancer/HERVFRD	-	2073	GE	HERVFRDLIKE	NM_207582/-/['TCGA']
Canon	P60508	ERVFRD-1	6	11105212	332	G	T	111	G	V	probably damaging	DOID:263 / kidney cancer/HERVFRD	-	2073	GE	HERVFRDLIKE	NM_207582/-/['COSMIC', 'IntOGen', 'ICGC', 'TCGA']
Canon	P60508	ERVFRD-1	6	11105213	331	G	A	111	G	R	probably damaging	DOID:1612 / breast cancer/HERVFRD	-	2073	GE	HERVFRDLIKE	NM_207582/-/['IntOGen', 'ICGC']	NM_207582/22722201/['COSMIC']
Canon	P60508	ERVFRD-1	6	11105222	322	C	T	108	P	S	probably damaging	DOID:8618 / oral cavity cancer/HERVFRD	-	2073	GE	HERVFRDLIKE	NM_207582/24292195/['COSMIC']	NM_207582/-/['ICGC']
Canon	P60508	ERVFRD-1	6	11105243	301	C	A	101	P	T	possibly damaging	DOID:1324 / lung cancer/HERVFRD	Gain|Phosphorylation	2073	GE	HERVFRDLIKE	NM_207582/-/['COSMIC', 'IntOGen', 'ICGC', 'TCGA']
Canon	P60508	ERVFRD-1	6	11105293	251	G	A	84	G	E	possibly damaging	DOID:4159 / skin cancer/HERVFRD	-	2073	GE	HERVFRDLIKE	NM_207582/22842228/['COSMIC']
Canon	P60508	ERVFRD-1	6	11105315	229	C	T	77	R	X	-	DOID:1993 / rectum cancer/HERVFRD	-	2073	GE	HERVFRDLIKE	NM_207582/-/['COSMIC']
Canon	P60508	ERVFRD-1	6	11105323	221	T	C	74	I	T	possibly damaging	DOID:1521 / cecum cancer/HERVFRD	-	2073	GE	HERVFRDLIKE	NM_207582/-/['COSMIC']
Canon	P60508	ERVFRD-1	6	11105323	221	T	G	74	I	S	probably damaging	DOID:2394 / ovarian cancer/HERVFRD	Gain|Phosphorylation	2073	GE	HERVFRDLIKE	NM_207582/21720365/['COSMIC']	NM_207582/-/['IntOGen', 'ICGC']
Canon	P60508	ERVFRD-1	6	11105335	209	C	T	70	A	V	benign	DOID:10534 / stomach cancer/HERVFRD	-	2073	GE	HERVFRDLIKE	NM_207582/-/['ICGC', 'TCGA']
Canon	P60508	ERVFRD-1	6	11105354	190	G	T	64	E	X	-	DOID:363 / uterine cancer/HERVFRD	-	2073	GE	HERVFRDLIKE	NM_207582/-/['TCGA', 'COSMIC']
Canon	P60508	ERVFRD-1	6	11105369	175	C	G	59	P	A	probably damaging	DOID:8618 / oral cavity cancer/HERVFRD	Gain|Phosphorylation	2073	GE	HERVFRDLIKE	NM_207582/-/['ICGC']	NM_207582/24292195/['COSMIC']
Canon	P60508	ERVFRD-1	6	11105384	160	C	T	54	P	S	possibly damaging	DOID:1319 / brain cancer/HERVFRD	Gain|Phosphorylation	2073	GE	HERVFRDLIKE	NM_207582/-/['COSMIC', 'ICGC']
Canon	P60508	ERVFRD-1	6	11105450	94	C	T	32	L	F	probably damaging	DOID:219 / colon cancer/HERVFRD	-	2073	GE	HERVFRDLIKE	NM_207582/-/['COSMIC']
Canon	P60508	ERVFRD-1	6	11105465	79	A	G	27	K	E	possibly damaging	DOID:219 / colon cancer/HERVFRD	-	2073	GE	HERVFRDLIKE	NM_207582/-/['COSMIC']
Canon	P60508	ERVFRD-1	6	11105465	79	A	G	27	K	E	possibly damaging	DOID:1521 / cecum cancer/HERVFRD	-	2073	GE	HERVFRDLIKE	NM_207582/-/['COSMIC']
Canon	P60508	ERVFRD-1	6	11105465	79	A	G	27	K	E	possibly damaging	DOID:2394 / ovarian cancer/HERVFRD	-	2073	GE	HERVFRDLIKE	NM_207582/21720365/['COSMIC']	NM_207582/-/['IntOGen']
Canon	P60508	ERVFRD-1	6	11105465	79	A	G	27	K	E	possibly damaging	DOID:263 / kidney cancer/HERVFRD	-	2073	GE	HERVFRDLIKE	NM_207582/-/['IntOGen', 'ICGC', 'TCGA', 'COSMIC']
Canon	P60508	ERVFRD-1	6	11105491	53	G	A	18	R	H	possibly damaging	DOID:363 / uterine cancer/HERVFRD	-	2073	GE	HERVFRDLIKE	NM_207582/-/['COSMIC', 'IntOGen', 'TCGA']
Canon	P60508	ERVFRD-1	6	11105515	29	T	C	10	L	P	possibly damaging	DOID:8618 / oral cavity cancer/HERVFRD	-	2073	GE	HERVFRDLIKE	NM_207582/23619168/['COSMIC']
NonCanon	Q96JX3	SERAC1	6	158579328	68	G	A	23	S	N	benign	DOID:11934 / head and neck cancer/MER74	Gain|Glycosylation	2382	Unclassifiable chains		NM_032861/-/['TCGA']
NonCanon	Q96JX3	SERAC1	6	158579374	22	G	A	8	V	I	benign	DOID:5041 / esophageal cancer/MER74	-	2382	Unclassifiable chains		NM_032861/-/['COSMIC', 'ICGC']
NonCanon	Q96JX3	SERAC1	6	158579383	13	G	A	5	A	T	possibly damaging	DOID:1793 / pancreatic cancer/MER74	Gain|Phosphorylation	2382	Unclassifiable chains		NM_032861/-/['TCGA']
Canon	Q14264	ERV3-1	7	64451649	1756	G	T	586	E	X	-	DOID:363 / uterine cancer/HERV3	-	2521	GE	HERVERI	NM_001007253/-/['COSMIC', 'TCGA']
Canon	Q14264	ERV3-1	7	64451658	1747	G	C	583	V	L	possibly damaging	DOID:1324 / lung cancer/HERV3	-	2521	GE	HERVERI	NM_001007253/-/['COSMIC', 'ICGC']
Canon	Q14264	ERV3-1	7	64451667	1738	G	A	580	E	K	benign	DOID:219 / colon cancer/HERV3	-	2521	GE	HERVERI	NM_001007253/22810696/['COSMIC']
Canon	Q14264	ERV3-1	7	64451790	1615	C	A	539	Q	K	possibly damaging	DOID:1781 / thyroid cancer/HERV3	Gain|Phosphorylation	2521	GE	HERVERI	NM_001007253/-/['COSMIC', 'ICGC']
Canon	Q14264	ERV3-1	7	64451822	1583	A	G	528	E	G	probably damaging	DOID:363 / uterine cancer/HERV3	Loss|+1 from N-linked Glycosylation	2521	GE	HERVERI	NM_001007253/-/['COSMIC', 'TCGA']
Canon	Q14264	ERV3-1	7	64451963	1442	A	G	481	N	S	benign	DOID:363 / uterine cancer/HERV3	-	2521	GE	HERVERI	NM_001007253/-/['TCGA']
Canon	Q14264	ERV3-1	7	64451963	1442	A	G	481	N	S	benign	DOID:10283 / prostate cancer/HERV3	-	2521	GE	HERVERI	NM_001007253/-/['TCGA']
Canon	Q14264	ERV3-1	7	64451963	1442	A	G	481	N	S	benign	DOID:1319 / brain cancer/HERV3	-	2521	GE	HERVERI	NM_001007253/-/['TCGA']
Canon	Q14264	ERV3-1	7	64451976	1429	G	T	477	D	Y	benign	DOID:219 / colon cancer/HERV3	-	2521	GE	HERVERI	NM_001007253/22810696/['COSMIC']
Canon	Q14264	ERV3-1	7	64452039	1366	G	T	456	A	S	benign	DOID:1793 / pancreatic cancer/HERV3	-	2521	GE	HERVERI	NM_001007253/-/['COSMIC', 'ICGC']
Canon	Q14264	ERV3-1	7	64452095	1310	G	A	437	C	Y	probably damaging	DOID:1612 / breast cancer/HERV3	Gain|Phosphorylation	2521	GE	HERVERI	NM_001007253/-/['COSMIC', 'ICGC', 'TCGA']
Canon	Q14264	ERV3-1	7	64452108	1297	T	C	433	W	R	probably damaging	DOID:4159 / skin cancer/HERV3	Gain|Phosphorylation	2521	GE	HERVERI	NM_001007253/-/['ICGC', 'TCGA']
Canon	Q14264	ERV3-1	7	64452165	1240	C	T	414	P	S	probably damaging	DOID:363 / uterine cancer/HERV3	Gain|Phosphorylation	2521	GE	HERVERI	NM_001007253/-/['COSMIC', 'TCGA']
Canon	Q14264	ERV3-1	7	64452191	1214	T	C	405	L	P	benign	DOID:10534 / stomach cancer/HERV3	-	2521	GE	HERVERI	NM_001007253/-/['TCGA']
Canon	Q14264	ERV3-1	7	64452191	1214	T	A	405	L	H	probably damaging	DOID:10534 / stomach cancer/HERV3	-	2521	GE	HERVERI	NM_001007253/-/['TCGA']
Canon	Q14264	ERV3-1	7	64452191	1214	T	G	405	L	R	probably damaging	DOID:10534 / stomach cancer/HERV3	-	2521	GE	HERVERI	NM_001007253/-/['TCGA']
Canon	Q14264	ERV3-1	7	64452203	1202	C	T	401	S	F	benign	DOID:4159 / skin cancer/HERV3	Loss|+2 from N-linked Glycosylation	2521	GE	HERVERI	NM_001007253/-/['ICGC', 'TCGA']
Canon	Q14264	ERV3-1	7	64452264	1141	A	C	381	S	R	benign	DOID:363 / uterine cancer/HERV3	-	2521	GE	HERVERI	NM_001007253/-/['COSMIC', 'TCGA']
Canon	Q14264	ERV3-1	7	64452342	1063	G	T	355	D	Y	probably damaging	DOID:11934 / head and neck cancer/HERV3	-	2521	GE	HERVERI	NM_001007253/-/['TCGA']
Canon	Q14264	ERV3-1	7	64452342	1063	G	T	355	D	Y	probably damaging	DOID:0060119 / pharynx cancer/HERV3	-	2521	GE	HERVERI	NM_001007253/-/['IntOGen']
Canon	Q14264	ERV3-1	7	64452362	1043	G	C	348	R	P	probably damaging	DOID:1612 / breast cancer/HERV3	-	2521	GE	HERVERI	NM_001007253/-/['COSMIC', 'IntOGen', 'ICGC', 'TCGA']
Canon	Q14264	ERV3-1	7	64452419	986	C	T	329	S	L	benign	DOID:4159 / skin cancer/HERV3	-	2521	GE	HERVERI	NM_001007253/-/['ICGC', 'TCGA']
Canon	Q14264	ERV3-1	7	64452419	986	C	G	329	S	X	-	DOID:4362 / cervical cancer/HERV3	-	2521	GE	HERVERI	NM_001007253/-/['COSMIC', 'TCGA']
Canon	Q14264	ERV3-1	7	64452432	973	G	A	325	E	K	benign	DOID:363 / uterine cancer/HERV3	Gain|Phosphorylation	2521	GE	HERVERI	NM_001007253/-/['COSMIC', 'TCGA']
Canon	Q14264	ERV3-1	7	64452432	973	G	A	325	E	K	benign	DOID:219 / colon cancer/HERV3	Gain|Phosphorylation	2521	GE	HERVERI	NM_001007253/22895193/['COSMIC']
Canon	Q14264	ERV3-1	7	64452444	961	G	A	321	A	T	possibly damaging	DOID:1793 / pancreatic cancer/HERV3	Gain|Phosphorylation	2521	GE	HERVERI	NM_001007253/-/['TCGA']
Canon	Q14264	ERV3-1	7	64452458	947	A	C	316	N	T	benign	DOID:1324 / lung cancer/HERV3	Gain|Phosphorylation	2521	GE	HERVERI	NM_001007253/23033341/['COSMIC']
Canon	Q14264	ERV3-1	7	64452580	825	A	T	275	L	F	probably damaging	DOID:4159 / skin cancer/HERV3	-	2521	GE	HERVERI	NM_001007253/-/['ICGC', 'TCGA']
Canon	Q14264	ERV3-1	7	64452582	823	T	G	275	L	V	probably damaging	DOID:363 / uterine cancer/HERV3	-	2521	GE	HERVERI	NM_001007253/-/['COSMIC', 'TCGA']
Canon	Q14264	ERV3-1	7	64452616	789	G	T	263	Q	H	probably damaging	DOID:1993 / rectum cancer/HERV3	-	2521	GE	HERVERI	NM_001007253/22810696/['COSMIC']
Canon	Q14264	ERV3-1	7	64452628	777	G	T	259	E	D	possibly damaging	DOID:363 / uterine cancer/HERV3	-	2521	GE	HERVERI	NM_001007253/-/['COSMIC', 'TCGA']
Canon	Q14264	ERV3-1	7	64452634	771	C	G	257	F	L	benign	DOID:11934 / head and neck cancer/HERV3	-	2521	GE	HERVERI	NM_001007253/-/['TCGA']
Canon	Q14264	ERV3-1	7	64452642	763	G	A	255	E	K	benign	DOID:1612 / breast cancer/HERV3	Gain|Phosphorylation	2521	GE	HERVERI	NM_001007253/-/['COSMIC', 'ICGC', 'TCGA']
Canon	Q14264	ERV3-1	7	64452669	736	C	A	246	R	S	possibly damaging	DOID:10534 / stomach cancer/HERV3	-	2521	GE	HERVERI	NM_001007253/-/['TCGA']
Canon	Q14264	ERV3-1	7	64452675	730	C	T	244	R	W	possibly damaging	DOID:3571 / liver cancer/HERV3	Gain|Phosphorylation	2521	GE	HERVERI	NM_001007253/-/['COSMIC', 'ICGC']
Canon	Q14264	ERV3-1	7	64452738	667	C	T	223	R	X	-	DOID:2531 / hematologic cancer/HERV3	-	2521	GE	HERVERI	NM_001007253/-/['ICGC']
Canon	Q14264	ERV3-1	7	64452777	628	C	G	210	P	A	probably damaging	DOID:4362 / cervical cancer/HERV3	-	2521	GE	HERVERI	NM_001007253/-/['TCGA']
Canon	Q14264	ERV3-1	7	64452809	596	C	A	199	S	Y	benign	DOID:363 / uterine cancer/HERV3	Gain|Phosphorylation	2521	GE	HERVERI	NM_001007253/-/['COSMIC', 'TCGA']
Canon	Q14264	ERV3-1	7	64452830	575	G	A	192	C	Y	probably damaging	DOID:2531 / hematologic cancer/HERV3	Gain|Phosphorylation	2521	GE	HERVERI	NM_001007253/-/['ICGC']
Canon	Q14264	ERV3-1	7	64452834	571	G	A	191	D	N	benign	DOID:11934 / head and neck cancer/HERV3	-	2521	GE	HERVERI	NM_001007253/-/['TCGA']
Canon	Q14264	ERV3-1	7	64452872	533	T	C	178	L	P	-	DOID:1793 / pancreatic cancer/HERV3	Gain|Phosphorylation	2521	GE	HERVERI	NM_001007253/-/['COSMIC']
Canon	Q14264	ERV3-1	7	64452891	514	T	C	172	S	P	benign	DOID:219 / colon cancer/HERV3	-	2521	GE	HERVERI	NM_001007253/22895193/['COSMIC']
Canon	Q14264	ERV3-1	7	64452902	503	G	A	168	C	Y	benign	DOID:4159 / skin cancer/HERV3	-	2521	GE	HERVERI	NM_001007253/-/['TCGA']
Canon	Q14264	ERV3-1	7	64452924	481	C	T	161	P	S	benign	DOID:4159 / skin cancer/HERV3	Gain|Phosphorylation	2521	GE	HERVERI	NM_001007253/-/['ICGC', 'TCGA']
Canon	Q14264	ERV3-1	7	64452930	475	G	A	159	D	N	benign	DOID:363 / uterine cancer/HERV3	-	2521	GE	HERVERI	NM_001007253/-/['COSMIC', 'TCGA']
Canon	Q14264	ERV3-1	7	64452930	475	G	A	159	D	N	benign	DOID:11934 / head and neck cancer/HERV3	-	2521	GE	HERVERI	NM_001007253/-/['TCGA']
Canon	Q14264	ERV3-1	7	64452955	450	G	T	150	R	S	benign	DOID:5041 / esophageal cancer/HERV3	-	2521	GE	HERVERI	NM_001007253/23525077/['COSMIC']
Canon	Q14264	ERV3-1	7	64452994	411	C	G	137	F	L	benign	DOID:11934 / head and neck cancer/HERV3	-	2521	GE	HERVERI	NM_001007253/-/['TCGA']
Canon	Q14264	ERV3-1	7	64453052	353	C	T	118	S	F	benign	DOID:4159 / skin cancer/HERV3	-	2521	GE	HERVERI	NM_001007253/-/['ICGC', 'TCGA']
Canon	Q14264	ERV3-1	7	64453056	349	G	A	117	V	I	benign	DOID:363 / uterine cancer/HERV3	-	2521	GE	HERVERI	NM_001007253/-/['COSMIC', 'TCGA']
Canon	Q14264	ERV3-1	7	64453073	332	C	T	111	P	L	benign	DOID:4159 / skin cancer/HERV3	-	2521	GE	HERVERI	NM_001007253/-/['ICGC', 'TCGA']
Canon	Q14264	ERV3-1	7	64453074	331	C	T	111	P	S	benign	DOID:4159 / skin cancer/HERV3	-	2521	GE	HERVERI	NM_001007253/-/['ICGC', 'TCGA']
Canon	Q14264	ERV3-1	7	64453116	289	G	A	97	G	R	probably damaging	DOID:4159 / skin cancer/HERV3	-	2521	GE	HERVERI	NM_001007253/-/['ICGC', 'TCGA']
Canon	Q14264	ERV3-1	7	64453119	286	G	T	96	V	F	benign	DOID:11934 / head and neck cancer/HERV3	-	2521	GE	HERVERI	NM_001007253/-/['TCGA']
Canon	Q14264	ERV3-1	7	64453119	286	G	T	96	V	F	benign	DOID:0060119 / pharynx cancer/HERV3	-	2521	GE	HERVERI	NM_001007253/-/['IntOGen']
Canon	Q14264	ERV3-1	7	64453167	238	G	T	80	V	L	benign	DOID:363 / uterine cancer/HERV3	-	2521	GE	HERVERI	NM_001007253/-/['COSMIC', 'IntOGen', 'TCGA']
Canon	Q14264	ERV3-1	7	64453178	227	G	A	76	G	D	benign	DOID:1612 / breast cancer/HERV3	-	2521	GE	HERVERI	NM_001007253/-/['IntOGen', 'ICGC', 'TCGA', 'COSMIC']
Canon	Q14264	ERV3-1	7	64453179	226	G	T	76	G	C	probably damaging	DOID:1324 / lung cancer/HERV3	-	2521	GE	HERVERI	NM_001007253/23033341/['COSMIC']
Canon	Q14264	ERV3-1	7	64453295	110	C	T	37	S	L	benign	DOID:10283 / prostate cancer/HERV3	-	2521	GE	HERVERI	NM_001007253/-/['COSMIC', 'ICGC', 'TCGA']
Canon	Q14264	ERV3-1	7	64453304	101	C	T	34	T	I	benign	DOID:1324 / lung cancer/HERV3	-	2521	GE	HERVERI	NM_001007253/23033341/['COSMIC']
Canon	Q14264	ERV3-1	7	64453327	78	G	T	26	E	D	-	DOID:263 / kidney cancer/HERV3	Gain|Phosphorylation	2521	GE	HERVERI	NM_001007253/-/['TCGA']
Canon	Q14264	ERV3-1	7	64453369	36	C	A	12	F	L	-	DOID:363 / uterine cancer/HERV3	-	2521	GE	HERVERI	NM_001007253/-/['TCGA', 'COSMIC']
NonCanon	Q01524	DEFA6	8	6782404	239	C	T	80	S	L	benign	DOID:4159 / skin cancer/MLT	Gain|Phosphorylation	2692	S		NM_001926/-/['ICGC', 'TCGA']
NonCanon	Q01524	DEFA6	8	6782416	227	G	A	76	R	K	probably damaging	DOID:4159 / skin cancer/MLT	Gain|Phosphorylation	2692	S		NM_001926/-/['TCGA']
NonCanon	Q01524	DEFA6	8	6783427	131	C	T	44	A	V	benign	DOID:263 / kidney cancer/MLT	-	2692	S		NM_001926/-/['ICGC', 'TCGA']
NonCanon	Q01524	DEFA6	8	6783431	127	G	T	43	G	W	probably damaging	DOID:219 / colon cancer/MLT	-	2692	S		NM_001926/-/['COSMIC', 'ICGC', 'TCGA']
NonCanon	Q01524	DEFA6	8	6783434	124	C	A	42	R	S	probably damaging	DOID:1324 / lung cancer/MLT	-	2692	S		NM_001926/-/['COSMIC', 'IntOGen']
NonCanon	Q01524	DEFA6	8	6783449	109	G	A	37	D	N	possibly damaging	DOID:4159 / skin cancer/MLT	-	2692	S		NM_001926/22842228/['COSMIC']
NonCanon	Q01524	DEFA6	8	6783453	105	G	T	35	E	D	probably damaging	DOID:10534 / stomach cancer/MLT	-	2692	S		NM_001926/-/['TCGA']
NonCanon	Q01524	DEFA6	8	6783460	98	C	T	33	A	V	possibly damaging	DOID:11054 / urinary bladder cancer/MLT	-	2692	S		NM_001926/-/['COSMIC', 'ICGC']	NM_001926/24121792/['COSMIC']
NonCanon	Q01524	DEFA6	8	6783472	86	T	C	29	L	P	probably damaging	DOID:1793 / pancreatic cancer/MLT	-	2692	S		NM_001926/-/['TCGA']
NonCanon	Q01524	DEFA6	8	6783475	83	C	T	28	P	L	probably damaging	DOID:4159 / skin cancer/MLT	-	2692	S		NM_001926/22842228/['COSMIC']
NonCanon	Q01524	DEFA6	8	6783476	82	C	T	28	P	S	probably damaging	DOID:4159 / skin cancer/MLT	-	2692	S		NM_001926/-/['ICGC', 'TCGA']
NonCanon	Q01524	DEFA6	8	6783482	76	G	A	26	D	N	possibly damaging	DOID:4159 / skin cancer/MLT	-	2692	S		NM_001926/-/['ICGC', 'TCGA']
NonCanon	Q01524	DEFA6	8	6783502	56	C	A	19	A	D	probably damaging	DOID:1793 / pancreatic cancer/MLT	-	2692	S		NM_001926/-/['TCGA']
NonCanon	P12838	DEFA4	8	6793547	289	G	A	97	D	N	probably damaging	DOID:363 / uterine cancer/MLT	-	2692	S		NM_001925/-/['COSMIC', 'TCGA']
NonCanon	P12838	DEFA4	8	6793553	283	C	T	95	R	C	benign	DOID:10534 / stomach cancer/MLT	-	2692	S		NM_001925/-/['ICGC', 'TCGA']
NonCanon	P12838	DEFA4	8	6793553	283	C	T	95	R	C	benign	DOID:1319 / brain cancer/MLT	-	2692	S		NM_001925/-/['ICGC', 'TCGA']
NonCanon	P12838	DEFA4	8	6793589	247	C	G	83	L	V	benign	DOID:1324 / lung cancer/MLT	-	2692	S		NM_001925/-/['COSMIC']
NonCanon	P12838	DEFA4	8	6793604	232	C	T	78	R	C	probably damaging	DOID:4159 / skin cancer/MLT	-	2692	S		NM_001925/-/['ICGC', 'TCGA']
NonCanon	P12838	DEFA4	8	6793610	226	G	T	76	E	X	-	DOID:363 / uterine cancer/MLT	-	2692	S		NM_001925/-/['COSMIC', 'TCGA']
NonCanon	P12838	DEFA4	8	6793612	224	C	G	75	T	R	possibly damaging	DOID:3571 / liver cancer/MLT	-	2692	S		NM_001925/-/['TCGA']
NonCanon	P12838	DEFA4	8	6793613	223	A	C	75	T	P	possibly damaging	DOID:1324 / lung cancer/MLT	-	2692	S		NM_001925/-/['IntOGen', 'ICGC', 'TCGA', 'COSMIC']
NonCanon	P12838	DEFA4	8	6793615	221	G	A	74	R	Q	possibly damaging	DOID:4159 / skin cancer/MLT	Gain|Phosphorylation	2692	S		NM_001925/-/['ICGC', 'TCGA']
NonCanon	P12838	DEFA4	8	6793615	221	G	A	74	R	Q	possibly damaging	DOID:219 / colon cancer/MLT	Gain|Phosphorylation	2692	S		NM_001925/16959974/['COSMIC']	NM_001925/-/['IntOGen']
NonCanon	P12838	DEFA4	8	6793627	209	T	A	70	V	E	possibly damaging	DOID:1324 / lung cancer/MLT	-	2692	S		NM_001925/-/['IntOGen', 'COSMIC']
NonCanon	P12838	DEFA4	8	6793654	182	G	A	61	R	K	benign	DOID:4159 / skin cancer/MLT	-	2692	S		NM_001925/-/['ICGC', 'TCGA']
NonCanon	P12838	DEFA4	8	6793661	175	T	C	59	S	P	possibly damaging	DOID:263 / kidney cancer/MLT	-	2692	S		NM_001925/-/['IntOGen', 'ICGC', 'COSMIC', 'TCGA']
NonCanon	P54219	SLC18A1	8	20022394	1001	C	T	334	P	L	probably damaging	DOID:4159 / skin cancer/HERVW	Gain|Phosphorylation	2748	GE	HERVW9	NM_001142325/-/['TCGA']	NM_003053/-/['TCGA']	NM_001135691/-/['TCGA']
NonCanon	P54219	SLC18A1	8	20022406	989	C	T	330	T	I	probably damaging	DOID:4159 / skin cancer/HERVW	-	2748	GE	HERVW9	NM_001142325/-/['ICGC', 'TCGA']	NM_003053/-/['ICGC', 'TCGA']	NM_001135691/-/['ICGC', 'TCGA']
NonCanon	P54219	SLC18A1	8	20022417	978	G	A	326	W	X	-	DOID:4159 / skin cancer/HERVW	-	2748	GE	HERVW9	NM_001135691/22842228/['COSMIC']	NM_001142325/22842228/['COSMIC']	NM_003053/22842228/['COSMIC']
NonCanon	P54219	SLC18A1	8	20022464	931	T	A	311	F	I	possibly damaging	DOID:1319 / brain cancer/HERVW	-	2748	GE	HERVW9	NM_001135691/-/['IntOGen']	NM_003053/-/['IntOGen']	NM_001142325/23917401/['COSMIC']	NM_003053/23917401/['COSMIC']
NonCanon	P54219	SLC18A1	8	20022464	931	T	A	311	F	I	possibly damaging	DOID:3070 / malignant glioma/HERVW	-	2748	GE	HERVW9	NM_001142325/-/['ICGC', 'TCGA']	NM_001135691/-/['ICGC', 'TCGA']	NM_003053/-/['ICGC', 'TCGA']
NonCanon	P54219	SLC18A1	8	20022582	895	G	C	299	D	H	probably damaging	DOID:1612 / breast cancer/HERVW	-	2748	GE	HERVW9	NM_001135691/-/['IntOGen', 'ICGC', 'COSMIC', 'TCGA']	NM_001142324/-/['IntOGen', 'ICGC', 'COSMIC', 'TCGA']	NM_003053/-/['IntOGen', 'ICGC', 'COSMIC', 'TCGA']	NM_001142325/-/['IntOGen', 'ICGC', 'COSMIC', 'TCGA']
NonCanon	P54219	SLC18A1	8	20022588	889	C	A	297	L	I	probably damaging	DOID:363 / uterine cancer/HERVW	Gain|Phosphorylation	2748	GE	HERVW9	NM_001135691/-/['COSMIC', 'TCGA']	NM_001142324/-/['COSMIC', 'TCGA']	NM_003053/-/['COSMIC', 'TCGA']	NM_001142325/-/['COSMIC', 'TCGA']
NonCanon	P54219	SLC18A1	8	20022597	880	T	A	294	F	I	benign	DOID:4159 / skin cancer/HERVW	-	2748	GE	HERVW9	NM_001142324/-/['TCGA']	NM_003053/-/['TCGA']	NM_001142325/-/['TCGA']	NM_001135691/-/['TCGA']
NonCanon	Q8TB45	DEPTOR	8	120886090	4	G	T	2	E	X	-	DOID:1324 / lung cancer/HERVH	-	2946	GE	HERVHF	NM_001283012/-/['COSMIC', 'ICGC']	NM_022783/-/['COSMIC', 'ICGC']
NonCanon	Q8TB45	DEPTOR	8	120886163	77	A	G	26	E	G	probably damaging	DOID:4159 / skin cancer/HERVH	Gain|Phosphorylation	2946	GE	HERVHF	NM_001283012/21984974/['COSMIC']	NM_022783/21984974/['COSMIC']
NonCanon	Q8TB45	DEPTOR	8	120886171	85	C	T	29	R	C	probably damaging	DOID:363 / uterine cancer/HERVH	-	2946	GE	HERVHF	NM_001283012/-/['COSMIC', 'TCGA']	NM_022783/-/['COSMIC', 'TCGA']
NonCanon	Q8TB45	DEPTOR	8	120886177	91	G	A	31	A	T	probably damaging	DOID:10534 / stomach cancer/HERVH	Gain|Phosphorylation	2946	GE	HERVHF	NM_022783/-/['ICGC', 'TCGA']	NM_001283012/-/['ICGC', 'TCGA']
NonCanon	Q8TB45	DEPTOR	8	120886193	107	C	G	36	T	S	benign	DOID:2394 / ovarian cancer/HERVH	Gain|Phosphorylation	2946	GE	HERVHF	NM_022783/-/['IntOGen']	NM_001283012/-/['IntOGen']	NM_001283012/21720365/['COSMIC']	NM_022783/21720365/['COSMIC']
NonCanon	C9JL84	HHLA1	8	133088304	1313	C	T	438	S	L	probably damaging	DOID:1612 / breast cancer/HERVH	-	2965	GE	HERVHF	NM_001145095/-/['COSMIC', 'ICGC', 'TCGA']
NonCanon	C9JL84	HHLA1	8	133088356	1261	C	T	421	P	S	probably damaging	DOID:5041 / esophageal cancer/HERVH	-	2965	GE	HERVHF	NM_001145095/-/['ICGC']
NonCanon	C9JL84	HHLA1	8	133088357	1260	G	C	420	W	C	probably damaging	DOID:1612 / breast cancer/HERVH	-	2965	GE	HERVHF	NM_001145095/-/['COSMIC', 'ICGC', 'TCGA']
NonCanon	C9JL84	HHLA1	8	133088364	1253	C	A	418	A	E	possibly damaging	DOID:1324 / lung cancer/HERVH	-	2965	GE	HERVHF	NM_001145095/22941189/['COSMIC']	NM_001145095/-/['IntOGen']
NonCanon	C9JL84	HHLA1	8	133088371	1246	C	T	416	L	F	probably damaging	DOID:363 / uterine cancer/HERVH	-	2965	GE	HERVHF	NM_001145095/-/['COSMIC', 'TCGA']
NonCanon	C9JL84	HHLA1	8	133088371	1246	C	A	416	L	I	benign	DOID:3571 / liver cancer/HERVH	-	2965	GE	HERVHF	NM_001145095/-/['COSMIC', 'ICGC']
NonCanon	C9JL84	HHLA1	8	133089975	1169	T	C	390	L	S	benign	DOID:4362 / cervical cancer/HERVH	Gain|Phosphorylation	2965	GE	HERVHF	NM_001145095/-/['TCGA']
NonCanon	C9JL84	HHLA1	8	133090032	1112	C	T	371	A	V	benign	DOID:219 / colon cancer/HERVH	-	2965	GE	HERVHF	NM_001145095/-/['COSMIC', 'ICGC', 'TCGA']
NonCanon	C9JL84	HHLA1	8	133090093	1051	C	G	351	R	G	benign	DOID:1612 / breast cancer/HERVH	-	2965	GE	HERVHF	NM_001145095/-/['COSMIC', 'ICGC', 'TCGA']
NonCanon	C9JL84	HHLA1	8	133090105	1039	C	A	347	L	I	benign	DOID:363 / uterine cancer/HERVH	-	2965	GE	HERVHF	NM_001145095/-/['COSMIC', 'TCGA']
NonCanon	C9JL84	HHLA1	8	133090141	1003	G	A	335	A	T	benign	DOID:3571 / liver cancer/HERVH	-	2965	GE	HERVHF	NM_001145095/-/['TCGA']
NonCanon	C9JL84	HHLA1	8	133090150	994	G	A	332	V	M	benign	DOID:219 / colon cancer/HERVH	Gain|Phosphorylation	2965	GE	HERVHF	NM_001145095/22895193/['COSMIC']
NonCanon	C9JL84	HHLA1	8	133090189	955	T	G	319	L	V	benign	DOID:5041 / esophageal cancer/HERVH	-	2965	GE	HERVHF	NM_001145095/-/['ICGC']
NonCanon	C9JL84	HHLA1	8	133091970	920	C	T	307	A	V	benign	DOID:1793 / pancreatic cancer/HERVH	-	2965	GE	HERVHF	NM_001145095/-/['COSMIC', 'ICGC']
NonCanon	C9JL84	HHLA1	8	133092048	842	C	T	281	T	I	benign	DOID:1324 / lung cancer/HERVH	-	2965	GE	HERVHF	NM_001145095/-/['COSMIC', 'ICGC']
NonCanon	C9JL84	HHLA1	8	133092078	812	A	C	271	E	A	benign	DOID:10534 / stomach cancer/HERVH	Gain|Phosphorylation	2965	GE	HERVHF	NM_001145095/-/['COSMIC', 'ICGC']
NonCanon	C9JL84	HHLA1	8	133092138	752	C	T	251	P	L	benign	DOID:10534 / stomach cancer/HERVH	-	2965	GE	HERVHF	NM_001145095/-/['COSMIC']
NonCanon	C9JL84	HHLA1	8	133092138	752	C	T	251	P	L	benign	DOID:263 / kidney cancer/HERVH	-	2965	GE	HERVHF	NM_001145095/-/['ICGC', 'TCGA']
NonCanon	C9JL84	HHLA1	8	133092177	713	C	T	238	P	L	benign	DOID:363 / uterine cancer/HERVH	Gain|Phosphorylation	2965	GE	HERVHF	NM_001145095/22923510/['COSMIC']
NonCanon	C9JL84	HHLA1	8	133092198	692	G	T	231	G	V	benign	DOID:1324 / lung cancer/HERVH	-	2965	GE	HERVHF	NM_001145095/-/['COSMIC', 'ICGC']
NonCanon	Q9Y5Q8	GTF3C5	9	135906432	34	G	A	12	A	T	benign	DOID:10534 / stomach cancer/HERVIP	-	3170	GE	HERVIPADP	NM_012087/-/['ICGC', 'TCGA']	NM_001122823/-/['ICGC', 'TCGA']
NonCanon	Q9Y5Q8	GTF3C5	9	135906463	65	G	A	22	R	Q	benign	DOID:1324 / lung cancer/HERVIP	-	3170	GE	HERVIPADP	NM_001122823/-/['ICGC', 'COSMIC', 'TCGA']	NM_012087/-/['ICGC', 'COSMIC', 'TCGA']
NonCanon	Q9Y5Q8	GTF3C5	9	135906463	65	G	A	22	R	Q	benign	DOID:4362 / cervical cancer/HERVIP	-	3170	GE	HERVIPADP	NM_012087/-/['TCGA']	NM_001122823/-/['TCGA']
NonCanon	Q9Y5Q8	GTF3C5	9	135906463	65	G	A	22	R	Q	benign	DOID:11054 / urinary bladder cancer/HERVIP	-	3170	GE	HERVIPADP	NM_012087/-/['ICGC', 'TCGA', 'COSMIC']	NM_001122823/-/['ICGC', 'TCGA', 'COSMIC']
NonCanon	Q9Y5Q8	GTF3C5	9	135906536	138	G	T	46	E	D	probably damaging	DOID:1324 / lung cancer/HERVIP	-	3170	GE	HERVIPADP	NM_001122823/-/['COSMIC', 'ICGC']	NM_012087/-/['COSMIC', 'ICGC']
NonCanon	Q9ULK0	GRID1	10	87362080	2980	G	A	994	G	R	benign	DOID:4159 / skin cancer/MER4?	-	3314	GE	HERVERI	NM_017551/-/['ICGC', 'TCGA']
NonCanon	Q9ULK0	GRID1	10	87362103	2957	C	A	986	P	H	probably damaging	DOID:1324 / lung cancer/MER4?	Gain|Phosphorylation	3314	GE	HERVERI	NM_017551/-/['COSMIC', 'IntOGen', 'ICGC', 'TCGA']
NonCanon	Q9ULK0	GRID1	10	87362123	2937	C	G	979	S	R	probably damaging	DOID:1324 / lung cancer/MER4?	Gain|Phosphorylation	3314	GE	HERVERI	NM_017551/22980975/['COSMIC']
NonCanon	Q9ULK0	GRID1	10	87362130	2930	G	A	977	R	Q	probably damaging	DOID:219 / colon cancer/MER4?	Gain|Phosphorylation	3314	GE	HERVERI	NM_017551/22895193/['COSMIC']
NonCanon	Q9ULK0	GRID1	10	87362131	2929	C	T	977	R	W	probably damaging	DOID:363 / uterine cancer/MER4?	Gain|Phosphorylation	3314	GE	HERVERI	NM_017551/-/['COSMIC', 'IntOGen', 'TCGA']
NonCanon	Q9ULK0	GRID1	10	87362131	2929	C	T	977	R	W	probably damaging	DOID:11054 / urinary bladder cancer/MER4?	Gain|Phosphorylation	3314	GE	HERVERI	NM_017551/-/['COSMIC', 'IntOGen', 'ICGC', 'TCGA']
NonCanon	Q9ULK0	GRID1	10	87362151	2909	C	T	970	S	L	benign	DOID:4159 / skin cancer/MER4?	-	3314	GE	HERVERI	NM_017551/-/['ICGC', 'TCGA']
NonCanon	Q9ULK0	GRID1	10	87362211	2849	A	G	950	N	S	benign	DOID:219 / colon cancer/MER4?	Gain|Phosphorylation	3314	GE	HERVERI	NM_017551/-/['COSMIC', 'ICGC', 'TCGA']
NonCanon	Q9ULK0	GRID1	10	87362239	2821	C	T	941	R	W	probably damaging	DOID:1612 / breast cancer/MER4?	-	3314	GE	HERVERI	NM_017551/-/['IntOGen', 'ICGC', 'TCGA', 'COSMIC']
NonCanon	Q9ULK0	GRID1	10	87362257	2803	A	T	935	S	C	benign	DOID:1324 / lung cancer/MER4?	-	3314	GE	HERVERI	NM_017551/22980975/['COSMIC']
NonCanon	Q9ULK0	GRID1	10	87362286	2774	T	G	925	L	R	probably damaging	DOID:10534 / stomach cancer/MER4?	-	3314	GE	HERVERI	NM_017551/-/['ICGC', 'TCGA']
NonCanon	Q9ULK0	GRID1	10	87362307	2753	G	A	918	R	Q	probably damaging	DOID:4159 / skin cancer/MER4?	Gain|Phosphorylation	3314	GE	HERVERI	NM_017551/-/['ICGC', 'TCGA']
NonCanon	Q9ULK0	GRID1	10	87362310	2750	C	G	917	T	R	benign	DOID:1324 / lung cancer/MER4?	-	3314	GE	HERVERI	NM_017551/-/['COSMIC']
NonCanon	Q9ULK0	GRID1	10	87362313	2747	C	T	916	P	L	possibly damaging	DOID:219 / colon cancer/MER4?	-	3314	GE	HERVERI	NM_017551/17932254/['COSMIC']
NonCanon	Q9ULK0	GRID1	10	87362322	2738	C	T	913	T	I	benign	DOID:4159 / skin cancer/MER4?	-	3314	GE	HERVERI	NM_017551/-/['ICGC']
NonCanon	Q9ULK0	GRID1	10	87362341	2719	G	A	907	G	S	benign	DOID:11934 / head and neck cancer/MER4?	-	3314	GE	HERVERI	NM_017551/-/['TCGA']
NonCanon	Q9ULK0	GRID1	10	87362343	2717	G	T	906	G	V	possibly damaging	DOID:1612 / breast cancer/MER4?	-	3314	GE	HERVERI	NM_017551/-/['IntOGen', 'ICGC', 'COSMIC', 'TCGA']
NonCanon	Q9ULK0	GRID1	10	87362358	2702	C	T	901	S	L	benign	DOID:8618 / oral cavity cancer/MER4?	-	3314	GE	HERVERI	NM_017551/21798897/['COSMIC']
NonCanon	Q9ULK0	GRID1	10	87362365	2695	G	A	899	E	K	possibly damaging	DOID:4159 / skin cancer/MER4?	-	3314	GE	HERVERI	NM_017551/-/['ICGC', 'TCGA']
NonCanon	Q9ULK0	GRID1	10	87362367	2693	T	G	898	I	S	possibly damaging	DOID:5041 / esophageal cancer/MER4?	Gain|Phosphorylation	3314	GE	HERVERI	NM_017551/23525077/['COSMIC']
NonCanon	Q9ULK0	GRID1	10	87362370	2690	C	T	897	S	L	probably damaging	DOID:1793 / pancreatic cancer/MER4?	-	3314	GE	HERVERI	NM_017551/-/['TCGA']
NonCanon	Q9ULK0	GRID1	10	87362373	2687	C	T	896	A	V	possibly damaging	DOID:1319 / brain cancer/MER4?	-	3314	GE	HERVERI	NM_017551/22820256/['COSMIC']
NonCanon	Q9ULK0	GRID1	10	87362379	2681	C	T	894	S	F	benign	DOID:4159 / skin cancer/MER4?	-	3314	GE	HERVERI	NM_017551/-/['TCGA']
NonCanon	Q9ULK0	GRID1	10	87362401	2659	G	T	887	D	Y	probably damaging	DOID:363 / uterine cancer/MER4?	Gain|Phosphorylation	3314	GE	HERVERI	NM_017551/-/['TCGA', 'COSMIC']
NonCanon	Q9ULK0	GRID1	10	87362404	2656	G	A	886	E	K	possibly damaging	DOID:4159 / skin cancer/MER4?	-	3314	GE	HERVERI	NM_017551/-/['ICGC', 'TCGA']
NonCanon	Q9ULK0	GRID1	10	87362413	2647	C	T	883	L	F	probably damaging	DOID:219 / colon cancer/MER4?	-	3314	GE	HERVERI	NM_017551/-/['ICGC', 'TCGA']
NonCanon	Q9ULK0	GRID1	10	87362413	2647	C	T	883	L	F	probably damaging	DOID:1521 / cecum cancer/MER4?	-	3314	GE	HERVERI	NM_017551/-/['COSMIC']
NonCanon	Q9ULK0	GRID1	10	87362418	2642	A	G	881	N	S	probably damaging	DOID:1909 / melanoma/MER4?	-	3314	GE	HERVERI	NM_017551/-/['ClinVar']
NonCanon	Q13325	IFIT5	10	91177012	56	A	G	19	H	R	probably damaging	DOID:263 / kidney cancer/HERV9	-	3317	GE	HERVW9	NM_012420/-/['ICGC', 'TCGA']
NonCanon	Q13325	IFIT5	10	91177038	82	G	T	28	D	Y	probably damaging	DOID:1993 / rectum cancer/HERV9	-	3317	GE	HERVW9	NM_012420/22810696/['COSMIC']
NonCanon	Q13325	IFIT5	10	91177057	101	T	C	34	V	A	possibly damaging	DOID:219 / colon cancer/HERV9	Gain|Phosphorylation	3317	GE	HERVW9	NM_012420/-/['COSMIC', 'ICGC', 'TCGA']
NonCanon	Q13325	IFIT5	10	91177062	106	G	C	36	D	H	possibly damaging	DOID:4607 / biliary tract cancer/HERV9	-	3317	GE	HERVW9	NM_012420/24185509/['COSMIC']
NonCanon	Q13325	IFIT5	10	91177096	140	C	A	47	T	K	benign	DOID:1781 / thyroid cancer/HERV9	-	3317	GE	HERVW9	NM_012420/-/['COSMIC', 'ICGC']
NonCanon	Q13325	IFIT5	10	91177111	155	C	T	52	A	V	benign	DOID:11934 / head and neck cancer/HERV9	-	3317	GE	HERVW9	NM_012420/-/['TCGA']
NonCanon	Q13325	IFIT5	10	91177111	155	C	T	52	A	V	benign	DOID:0060119 / pharynx cancer/HERV9	-	3317	GE	HERVW9	NM_012420/-/['IntOGen']
NonCanon	Q13325	IFIT5	10	91177126	170	T	C	57	L	S	probably damaging	DOID:219 / colon cancer/HERV9	Gain|Glycosylation	3317	GE	HERVW9	NM_012420/-/['COSMIC']
NonCanon	Q13325	IFIT5	10	91177128	172	G	A	58	A	T	probably damaging	DOID:363 / uterine cancer/HERV9	Gain|Phosphorylation	3317	GE	HERVW9	NM_012420/-/['COSMIC', 'TCGA']
NonCanon	Q13325	IFIT5	10	91177164	208	G	A	70	A	T	probably damaging	DOID:219 / colon cancer/HERV9	Loss|Binding Site	3317	GE	HERVW9	NM_012420/23856246/['COSMIC']
NonCanon	Q13325	IFIT5	10	91177167	211	C	T	71	L	F	possibly damaging	DOID:363 / uterine cancer/HERV9	-	3317	GE	HERVW9	NM_012420/-/['COSMIC', 'IntOGen', 'TCGA']
NonCanon	Q13325	IFIT5	10	91177197	241	A	C	81	I	L	benign	DOID:10534 / stomach cancer/HERV9	-	3317	GE	HERVW9	NM_012420/-/['TCGA']
NonCanon	Q13325	IFIT5	10	91177220	264	A	T	88	K	N	benign	DOID:3571 / liver cancer/HERV9	Gain|Phosphorylation	3317	GE	HERVW9	NM_012420/23788652/['COSMIC']
NonCanon	Q92887	ABCC2	10	101578623	2348	T	A	783	L	H	probably damaging	DOID:4159 / skin cancer/HML2	-	3340	AB		NM_000392/-/['TCGA']
NonCanon	Q92887	ABCC2	10	101578640	2365	T	C	789	S	P	probably damaging	DOID:1993 / rectum cancer/HML2	-	3340	AB		NM_000392/-/['COSMIC']
NonCanon	Q92887	ABCC2	10	101578640	2365	T	C	789	S	P	probably damaging	DOID:1521 / cecum cancer/HML2	-	3340	AB		NM_000392/-/['COSMIC']
NonCanon	Q92887	ABCC2	10	101578641	2366	C	G	789	S	C	probably damaging	DOID:2394 / ovarian cancer/HML2	-	3340	AB		NM_000392/21720365/['COSMIC']	NM_000392/-/['IntOGen']
NonCanon	Q92887	ABCC2	10	101578643	2368	G	T	790	A	S	probably damaging	DOID:1324 / lung cancer/HML2	-	3340	AB		NM_000392/-/['COSMIC', 'IntOGen', 'ICGC', 'TCGA']
NonCanon	Q92887	ABCC2	10	101578649	2374	G	T	792	D	Y	probably damaging	DOID:11934 / head and neck cancer/HML2	-	3340	AB		NM_000392/-/['TCGA']
NonCanon	Q92887	ABCC2	10	101578649	2374	G	T	792	D	Y	probably damaging	DOID:0060119 / pharynx cancer/HML2	-	3340	AB		NM_000392/-/['IntOGen']
NonCanon	Q92887	ABCC2	10	101578850	2444	G	A	815	R	Q	probably damaging	DOID:363 / uterine cancer/HML2	-	3340	AB		NM_000392/-/['COSMIC', 'TCGA']
NonCanon	Q92887	ABCC2	10	101578850	2444	G	A	815	R	Q	probably damaging	DOID:1324 / lung cancer/HML2	-	3340	AB		NM_000392/22980975/['COSMIC']
NonCanon	Q92887	ABCC2	10	101578852	2446	C	T	816	L	F	possibly damaging	DOID:1324 / lung cancer/HML2	Gain|Phosphorylation	3340	AB		NM_000392/22980975/['COSMIC']
NonCanon	Q92887	ABCC2	10	101578879	2473	C	A	825	L	I	probably damaging	DOID:363 / uterine cancer/HML2	-	3340	AB		NM_000392/-/['COSMIC', 'TCGA']
NonCanon	Q92887	ABCC2	10	101578906	2500	C	A	834	L	M	benign	DOID:363 / uterine cancer/HML2	Gain|Phosphorylation	3340	AB		NM_000392/-/['COSMIC', 'TCGA']
NonCanon	Q92887	ABCC2	10	101578909	2503	G	T	835	G	W	probably damaging	DOID:263 / kidney cancer/HML2	-	3340	AB		NM_000392/23856246/['COSMIC']
NonCanon	Q92887	ABCC2	10	101578919	2513	C	A	838	T	K	benign	DOID:263 / kidney cancer/HML2	-	3340	AB		NM_000392/-/['ICGC', 'TCGA']
NonCanon	Q92887	ABCC2	10	101578954	2548	G	T	850	A	S	benign	DOID:1993 / rectum cancer/HML2	-	3340	AB		NM_000392/-/['ICGC', 'TCGA', 'COSMIC']
NonCanon	Q92887	ABCC2	10	101578954	2548	G	T	850	A	S	benign	DOID:3571 / liver cancer/HML2	-	3340	AB		NM_000392/-/['COSMIC', 'ICGC']
NonCanon	Q92887	ABCC2	10	101578963	2557	G	A	853	G	R	possibly damaging	DOID:4159 / skin cancer/HML2	-	3340	AB		NM_000392/-/['ICGC', 'TCGA']
NonCanon	Q92887	ABCC2	10	101578969	2563	T	A	855	F	I	probably damaging	DOID:10534 / stomach cancer/HML2	-	3340	AB		NM_000392/-/['ICGC', 'TCGA']
NonCanon	Q92887	ABCC2	10	101578977	2571	G	T	857	K	N	benign	DOID:363 / uterine cancer/HML2	-	3340	AB		NM_000392/-/['COSMIC', 'TCGA']
NonCanon	P05093	CYP17A1	10	104596833	286	C	T	96	R	W	probably damaging	DOID:2531 / hematologic cancer/HML8	-	3344	AB		NM_000102/24325359/['COSMIC']
NonCanon	P05093	CYP17A1	10	104596862	257	T	C	86	L	P	probably damaging	DOID:4159 / skin cancer/HML8	-	3344	AB		NM_000102/22842228/['COSMIC']
NonCanon	P05093	CYP17A1	10	104596868	251	A	T	84	E	V	probably damaging	DOID:263 / kidney cancer/HML8	-	3344	AB		NM_000102/-/['COSMIC', 'IntOGen', 'ICGC', 'TCGA']
NonCanon	P05093	CYP17A1	10	104596869	250	G	A	84	E	K	probably damaging	DOID:4159 / skin cancer/HML8	-	3344	AB		NM_000102/-/['ICGC', 'TCGA']
NonCanon	P05093	CYP17A1	10	104596883	236	A	C	79	H	P	probably damaging	DOID:1612 / breast cancer/HML8	-	3344	AB		NM_000102/-/['COSMIC', 'ICGC', 'TCGA']
NonCanon	P05093	CYP17A1	10	104596920	199	C	T	67	R	C	probably damaging	DOID:4159 / skin cancer/HML8	-	3344	AB		NM_000102/-/['ICGC', 'TCGA']
NonCanon	P05093	CYP17A1	10	104596925	194	C	T	65	S	L	probably damaging	DOID:363 / uterine cancer/HML8	-	3344	AB		NM_000102/-/['COSMIC', 'TCGA']
NonCanon	P05093	CYP17A1	10	104596968	151	A	G	51	N	D	benign	DOID:1612 / breast cancer/HML8	-	3344	AB		NM_000102/-/['COSMIC', 'ICGC', 'TCGA']
NonCanon	P05093	CYP17A1	10	104597033	86	A	T	29	K	M	probably damaging	DOID:10534 / stomach cancer/HML8	-	3344	AB		NM_000102/-/['ICGC', 'TCGA']
NonCanon	P05093	CYP17A1	10	104597036	83	C	A	28	P	H	probably damaging	DOID:3571 / liver cancer/HML8	-	3344	AB		NM_000102/-/['TCGA']
NonCanon	P05093	CYP17A1	10	104597058	61	A	T	21	R	W	probably damaging	DOID:219 / colon cancer/HML8	-	3344	AB		NM_000102/22895193/['COSMIC']
NonCanon	P05093	CYP17A1	10	104597060	59	G	A	20	R	K	benign	DOID:4362 / cervical cancer/HML8	-	3344	AB		NM_000102/-/['TCGA']
NonCanon	P05093	CYP17A1	10	104597068	51	G	T	17	W	C	probably damaging	DOID:10534 / stomach cancer/HML8	-	3344	AB		NM_000102/-/['ICGC', 'TCGA']
NonCanon	P05093	CYP17A1	10	104597079	40	T	C	14	Y	H	probably damaging	DOID:219 / colon cancer/HML8	-	3344	AB		NM_000102/22810696/['COSMIC']
NonCanon	P05093	CYP17A1	10	104597099	20	T	C	7	L	P	probably damaging	DOID:363 / uterine cancer/HML8	-	3344	AB		NM_000102/-/['COSMIC', 'TCGA']
NonCanon	Q9BZH6	WDR11	10	122610933	1	A	T	1	M	L	possibly damaging	DOID:5041 / esophageal cancer/HERVH	-	3370	GE	HERVHF	NM_018117/-/['ICGC']
NonCanon	Q9BZH6	WDR11	10	122610940	8	C	T	3	P	L	probably damaging	DOID:4159 / skin cancer/HERVH	Gain|Phosphorylation	3370	GE	HERVHF	NM_018117/21984974/['COSMIC']
NonCanon	Q68D85	NCR3LG1	11	17393584	890	C	T	297	P	L	probably damaging	DOID:1612 / breast cancer/HUERSP3	Gain|Phosphorylation	3409	GE	HUERSP	NM_001202439/-/['COSMIC', 'ICGC', 'TCGA']
NonCanon	Q68D85	NCR3LG1	11	17393644	950	A	G	317	H	R	benign	DOID:2531 / hematologic cancer/HUERSP3	-	3409	GE	HUERSP	NM_001202439/-/['ICGC']
NonCanon	Q6UWF7	NXPE4	11	114465413	69	T	G	23	I	M	possibly damaging	DOID:1793 / pancreatic cancer/HUERSP3	-	3648	GE	HUERSP	NM_001077639/-/['TCGA']
NonCanon	Q6UWF7	NXPE4	11	114465423	59	C	A	20	S	Y	benign	DOID:1324 / lung cancer/HUERSP3	Gain|Phosphorylation	3648	GE	HUERSP	NM_001077639/-/['IntOGen', 'ICGC', 'TCGA', 'COSMIC']
NonCanon	Q6UWF7	NXPE4	11	114465445	37	G	C	13	A	P	possibly damaging	DOID:3571 / liver cancer/HUERSP3	-	3648	GE	HUERSP	NM_001077639/-/['ICGC', 'COSMIC']
NonCanon	Q6UWF7	NXPE4	11	114465450	32	T	A	11	L	Q	benign	DOID:2531 / hematologic cancer/HUERSP3	-	3648	GE	HUERSP	NM_001077639/-/['ICGC']
NonCanon	Q6UWF7	NXPE4	11	114465469	13	A	G	5	M	V	benign	DOID:0060119 / pharynx cancer/HUERSP3	-	3648	GE	HUERSP	NM_001077639/-/['IntOGen']
NonCanon	Q6UWF7	NXPE4	11	114465469	13	A	G	5	M	V	benign	DOID:2596 / larynx cancer/HUERSP3	-	3648	GE	HUERSP	NM_001077639/21798893/['COSMIC']
NonCanon	Q6UWF7	NXPE4	11	114465478	4	A	T	2	K	X	-	DOID:5041 / esophageal cancer/HUERSP3	-	3648	GE	HUERSP	NM_001077639/-/['ICGC']
NonCanon	Q6UWF7	NXPE4	11	114465481	1	A	C	1	M	L	benign	DOID:263 / kidney cancer/HUERSP3	-	3648	GE	HUERSP	NM_001077639/-/['TCGA']
NonCanon	Q9NZS2	KLRF1	12	9985925	211	C	T	71	Q	X	-	DOID:1612 / breast cancer/HERVH	-	3698	GE	HERVHF	NM_016523/-/['COSMIC', 'IntOGen', 'ICGC', 'TCGA']
NonCanon	Q9NZS2	KLRF1	12	9985926	212	A	G	71	Q	R	benign	DOID:1324 / lung cancer/HERVH	-	3698	GE	HERVHF	NM_016523/-/['IntOGen', 'ICGC', 'COSMIC', 'TCGA']
NonCanon	Q9NZS2	KLRF1	12	9985929	215	A	G	72	K	R	benign	DOID:219 / colon cancer/HERVH	-	3698	GE	HERVHF	NM_016523/-/['COSMIC']
NonCanon	Q9NZS2	KLRF1	12	9985929	215	A	C	72	K	T	possibly damaging	DOID:1993 / rectum cancer/HERVH	-	3698	GE	HERVHF	NM_016523/17932254/['COSMIC']
NonCanon	Q9NZS2	KLRF1	12	9985974	260	T	C	87	L	P	benign	DOID:1324 / lung cancer/HERVH	Gain|Phosphorylation	3698	GE	HERVHF	NM_016523/-/['COSMIC', 'IntOGen']
NonCanon	Q9NZS2	KLRF1	12	9985995	281	G	T	94	R	I	probably damaging	DOID:363 / uterine cancer/HERVH	-	3698	GE	HERVHF	NM_016523/-/['COSMIC', 'TCGA']
NonCanon	Q9NZS2	KLRF1	12	9985996	282	A	C	94	R	S	possibly damaging	DOID:363 / uterine cancer/HERVH	-	3698	GE	HERVHF	NM_016523/-/['COSMIC', 'TCGA']
NonCanon	Q9NZS2	KLRF1	12	9986018	304	C	A	102	L	I	benign	DOID:219 / colon cancer/HERVH	Gain|Phosphorylation	3698	GE	HERVHF	NM_016523/-/['COSMIC']
NonCanon	Q8NEY8	PPHLN1	12	42835124	752	G	T	251	R	L	probably damaging	DOID:2394 / ovarian cancer/HML5	-	3776	AB		NM_001143787/-/['COSMIC']
NonCanon	Q8NEY8	PPHLN1	12	42835124	938	G	T	313	R	L	probably damaging	DOID:2394 / ovarian cancer/HML5	-	3776	AB		NM_201515/-/['COSMIC']
NonCanon	Q8NEY8	PPHLN1	12	42835124	773	G	T	258	R	L	probably damaging	DOID:2394 / ovarian cancer/HML5	-	3776	AB		NM_201440/-/['COSMIC']
NonCanon	Q8NEY8	PPHLN1	12	42835124	860	G	T	287	R	L	probably damaging	DOID:2394 / ovarian cancer/HML5	-	3776	AB		NM_001143788/-/['COSMIC']
NonCanon	Q8NEY8	PPHLN1	12	42835124	917	G	T	306	R	L	probably damaging	DOID:2394 / ovarian cancer/HML5	-	3776	AB		NM_201439/-/['COSMIC']	NM_016488/-/['COSMIC']
NonCanon	Q8NEY8	PPHLN1	12	42835202	851	T	A	284	F	Y	probably damaging	DOID:10534 / stomach cancer/HML5	-	3776	AB		NM_201440/-/['ICGC', 'TCGA']
NonCanon	Q8NEY8	PPHLN1	12	42835202	830	T	A	277	F	Y	probably damaging	DOID:10534 / stomach cancer/HML5	-	3776	AB		NM_001143787/-/['ICGC', 'TCGA']
NonCanon	Q8NEY8	PPHLN1	12	42835202	1016	T	A	339	F	Y	probably damaging	DOID:10534 / stomach cancer/HML5	-	3776	AB		NM_201515/-/['ICGC', 'TCGA']
NonCanon	Q8NEY8	PPHLN1	12	42835202	938	T	A	313	F	Y	probably damaging	DOID:10534 / stomach cancer/HML5	-	3776	AB		NM_001143788/-/['ICGC', 'TCGA']
NonCanon	Q8NEY8	PPHLN1	12	42835202	995	T	A	332	F	Y	probably damaging	DOID:10534 / stomach cancer/HML5	-	3776	AB		NM_201439/-/['ICGC', 'TCGA']	NM_016488/-/['ICGC', 'TCGA']
NonCanon	Q8NEY8	PPHLN1	12	42835228	856	A	C	286	I	L	possibly damaging	DOID:1612 / breast cancer/HML5	-	3776	AB		NM_001143787/-/['COSMIC', 'IntOGen', 'ICGC', 'TCGA']
NonCanon	Q8NEY8	PPHLN1	12	42835228	1042	A	C	348	I	L	possibly damaging	DOID:1612 / breast cancer/HML5	-	3776	AB		NM_201515/-/['COSMIC', 'IntOGen', 'ICGC', 'TCGA']
NonCanon	Q8NEY8	PPHLN1	12	42835228	1021	A	C	341	I	L	possibly damaging	DOID:1612 / breast cancer/HML5	-	3776	AB		NM_016488/-/['COSMIC', 'IntOGen', 'ICGC', 'TCGA']	NM_201439/-/['COSMIC', 'IntOGen', 'ICGC', 'TCGA']
NonCanon	Q8NEY8	PPHLN1	12	42835228	877	A	C	293	I	L	possibly damaging	DOID:1612 / breast cancer/HML5	-	3776	AB		NM_201440/-/['COSMIC', 'IntOGen', 'ICGC', 'TCGA']
NonCanon	Q8NEY8	PPHLN1	12	42835228	964	A	C	322	I	L	possibly damaging	DOID:1612 / breast cancer/HML5	-	3776	AB		NM_001143788/-/['COSMIC', 'IntOGen', 'ICGC', 'TCGA']
NonCanon	Q8NEY8	PPHLN1	12	42836457	1039	A	G	347	T	A	possibly damaging	DOID:219 / colon cancer/HML5	-	3776	AB		NM_016488/22895193/['COSMIC']
NonCanon	Q8NEY8	PPHLN1	12	42836457	874	A	G	292	T	A	possibly damaging	DOID:219 / colon cancer/HML5	-	3776	AB		NM_001143787/22895193/['COSMIC']
NonCanon	Q8NEY8	PPHLN1	12	42836502	919	G	A	307	D	N	probably damaging	DOID:219 / colon cancer/HML5	-	3776	AB		NM_001143787/22895193/['COSMIC']
NonCanon	Q8NEY8	PPHLN1	12	42836502	1084	G	A	362	D	N	probably damaging	DOID:219 / colon cancer/HML5	-	3776	AB		NM_016488/22895193/['COSMIC']
NonCanon	Q8NEY8	PPHLN1	12	42836512	1094	C	T	365	P	L	benign	DOID:4159 / skin cancer/HML5	-	3776	AB		NM_016488/21984974/['COSMIC']
NonCanon	Q8NEY8	PPHLN1	12	42836512	929	C	T	310	P	L	benign	DOID:4159 / skin cancer/HML5	-	3776	AB		NM_001143787/21984974/['COSMIC']
NonCanon	Q8NEY8	PPHLN1	12	42836514	931	G	A	311	E	K	benign	DOID:363 / uterine cancer/HML5	-	3776	AB		NM_001143787/-/['IntOGen', 'COSMIC', 'COSMIC', 'TCGA']
NonCanon	Q8NEY8	PPHLN1	12	42836514	1096	G	A	366	E	K	benign	DOID:363 / uterine cancer/HML5	-	3776	AB		NM_016488/-/['IntOGen', 'COSMIC', 'COSMIC', 'TCGA']
NonCanon	Q8NEY8	PPHLN1	12	42836514	931	G	A	311	E	K	benign	DOID:1993 / rectum cancer/HML5	-	3776	AB		NM_001143787/-/['COSMIC', 'ICGC', 'TCGA']
NonCanon	Q8NEY8	PPHLN1	12	42836514	1096	G	A	366	E	K	benign	DOID:1993 / rectum cancer/HML5	-	3776	AB		NM_016488/-/['COSMIC', 'ICGC', 'TCGA']
NonCanon	Q8NEY8	PPHLN1	12	42839868	1126	G	C	376	A	P	possibly damaging	DOID:1324 / lung cancer/HML5	Gain|Phosphorylation	3776	AB		NM_016488/22975805/['COSMIC']
NonCanon	Q8NEY8	PPHLN1	12	42839868	1054	G	C	352	A	P	possibly damaging	DOID:1324 / lung cancer/HML5	-	3776	AB		NM_001143787/22975805/['COSMIC']
NonCanon	Q8NEY8	PPHLN1	12	42839923	1181	G	A	394	R	H	benign	DOID:219 / colon cancer/HML5	-	3776	AB		NM_016488/-/['COSMIC', 'ICGC', 'TCGA']
NonCanon	Q8NEY8	PPHLN1	12	42839923	1109	G	A	370	R	H	benign	DOID:219 / colon cancer/HML5	-	3776	AB		NM_001143787/-/['COSMIC', 'ICGC', 'TCGA']
NonCanon	Q8NEY8	PPHLN1	12	42839941	1199	G	A	400	R	H	probably damaging	DOID:1793 / pancreatic cancer/HML5	Gain|Phosphorylation	3776	AB		NM_016488/-/['COSMIC']
NonCanon	Q8NEY8	PPHLN1	12	42839941	1127	G	A	376	R	H	probably damaging	DOID:1793 / pancreatic cancer/HML5	-	3776	AB		NM_001143787/-/['COSMIC']
NonCanon	Q8NEY8	PPHLN1	12	42839994	1180	C	T	394	Q	X	-	DOID:4159 / skin cancer/HML5	-	3776	AB		NM_001143787/-/['ICGC', 'TCGA']
NonCanon	Q8NEY8	PPHLN1	12	42839994	1252	C	T	418	Q	X	-	DOID:4159 / skin cancer/HML5	-	3776	AB		NM_016488/-/['ICGC', 'TCGA']
NonCanon	Q8NEY8	PPHLN1	12	42840060	1246	A	T	416	M	L	benign	DOID:1324 / lung cancer/HML5	-	3776	AB		NM_001143787/-/['COSMIC']
NonCanon	Q8NEY8	PPHLN1	12	42840060	1318	A	T	440	M	L	benign	DOID:1324 / lung cancer/HML5	-	3776	AB		NM_016488/-/['COSMIC']
NonCanon	Q8NEY8	PPHLN1	12	42840060	1246	A	G	416	M	V	benign	DOID:3571 / liver cancer/HML5	-	3776	AB		NM_001143787/-/['COSMIC', 'ICGC']
NonCanon	Q8NEY8	PPHLN1	12	42840060	1318	A	G	440	M	V	benign	DOID:3571 / liver cancer/HML5	-	3776	AB		NM_016488/-/['COSMIC', 'ICGC']
NonCanon	Q8NEY8	PPHLN1	12	42840067	1325	C	T	442	S	F	possibly damaging	DOID:4159 / skin cancer/HML5	Gain|Phosphorylation	3776	AB		NM_016488/-/['TCGA']
NonCanon	Q8NEY8	PPHLN1	12	42840067	1253	C	T	418	S	F	possibly damaging	DOID:4159 / skin cancer/HML5	-	3776	AB		NM_001143787/-/['TCGA']
NonCanon	Q8NEY8	PPHLN1	12	42840067	1325	C	A	442	S	Y	possibly damaging	DOID:363 / uterine cancer/HML5	Gain|Phosphorylation	3776	AB		NM_016488/-/['COSMIC', 'TCGA']
NonCanon	Q8NEY8	PPHLN1	12	42840067	1253	C	A	418	S	Y	possibly damaging	DOID:363 / uterine cancer/HML5	-	3776	AB		NM_001143787/-/['COSMIC', 'TCGA']
NonCanon	Q8NEY8	PPHLN1	12	42840394	1351	G	C	451	D	H	probably damaging	DOID:263 / kidney cancer/HML5	Gain|Phosphorylation	3776	AB		NM_016488/-/['TCGA']
NonCanon	Q8NEY8	PPHLN1	12	42840394	1279	G	C	427	D	H	probably damaging	DOID:263 / kidney cancer/HML5	-	3776	AB		NM_001143787/-/['TCGA']
NonCanon	Q8NEY8	PPHLN1	12	42840416	1373	A	T	458	Q	L	benign	DOID:1324 / lung cancer/HML5	-	3776	AB		NM_016488/-/['COSMIC']
NonCanon	Q6ZXV5	TMTC3	12	88568385	1201	G	A	401	V	I	benign	DOID:1793 / pancreatic cancer/HML5	-	3866	AB		NM_181783/-/['TCGA']
NonCanon	Q6ZXV5	TMTC3	12	88568385	1201	G	A	401	V	I	benign	DOID:10283 / prostate cancer/HML5	-	3866	AB		NM_181783/22722839/['COSMIC']
NonCanon	Q6ZXV5	TMTC3	12	88568433	1249	C	G	417	H	D	probably damaging	DOID:1612 / breast cancer/HML5	-	3866	AB		NM_181783/22722201/['COSMIC']	NM_181783/-/['IntOGen', 'ICGC']
NonCanon	Q6ZXV5	TMTC3	12	88568455	1271	G	A	424	R	K	probably damaging	DOID:1324 / lung cancer/HML5	-	3866	AB		NM_181783/-/['IntOGen', 'COSMIC']
NonCanon	Q6ZXV5	TMTC3	12	88568469	1285	G	C	429	E	Q	possibly damaging	DOID:1324 / lung cancer/HML5	-	3866	AB		NM_181783/-/['COSMIC', 'IntOGen']
NonCanon	Q6ZXV5	TMTC3	12	88570021	1357	G	T	453	G	C	probably damaging	DOID:1324 / lung cancer/HML5	Loss|Binding Site	3866	AB		NM_181783/-/['COSMIC', 'IntOGen']
NonCanon	Q6ZXV5	TMTC3	12	88570051	1387	G	C	463	E	Q	benign	DOID:11054 / urinary bladder cancer/HML5	-	3866	AB		NM_181783/-/['COSMIC', 'IntOGen', 'ICGC', 'TCGA']
NonCanon	Q6ZXV5	TMTC3	12	88570055	1391	G	T	464	R	I	benign	DOID:219 / colon cancer/HML5	-	3866	AB		NM_181783/-/['ICGC', 'TCGA']
NonCanon	Q6ZXV5	TMTC3	12	88570055	1391	G	T	464	R	I	benign	DOID:1521 / cecum cancer/HML5	-	3866	AB		NM_181783/-/['COSMIC']
NonCanon	Q6ZXV5	TMTC3	12	88570062	1398	G	C	466	L	F	benign	DOID:1612 / breast cancer/HML5	-	3866	AB		NM_181783/-/['COSMIC', 'ICGC', 'TCGA']
NonCanon	Q6ZXV5	TMTC3	12	88570093	1429	C	G	477	P	A	benign	DOID:363 / uterine cancer/HML5	-	3866	AB		NM_181783/-/['COSMIC', 'IntOGen', 'TCGA']
NonCanon	Q9UJX3	ANAPC7	12	110841453	82	C	T	28	P	S	benign	DOID:10534 / stomach cancer/HERVH	-	3901	GE	HERVHF	NM_016238/-/['ICGC', 'TCGA']	NM_001137664/-/['ICGC', 'TCGA']
NonCanon	Q9UJX3	ANAPC7	12	110841467	68	T	C	23	V	A	benign	DOID:1324 / lung cancer/HERVH	-	3901	GE	HERVHF	NM_001137664/22975805/['COSMIC']	NM_016238/22975805/['COSMIC']
NonCanon	Q99549	MPHOSPH8	13	20207890	2	T	C	1	M	T	benign	DOID:5041 / esophageal cancer/HML3	Loss|Acetylation	3927	AB		NM_017520/-/['ICGC', 'COSMIC']
NonCanon	Q99549	MPHOSPH8	13	20207928	40	C	T	14	P	S	benign	DOID:4159 / skin cancer/HML3	-	3927	AB		NM_017520/-/['ICGC', 'TCGA']
NonCanon	Q99549	MPHOSPH8	13	20208028	140	C	G	47	A	G	possibly damaging	DOID:263 / kidney cancer/HML3	-	3927	AB		NM_017520/-/['COSMIC', 'IntOGen', 'ICGC', 'TCGA']
NonCanon	Q99549	MPHOSPH8	13	20208066	178	G	C	60	E	Q	probably damaging	DOID:11054 / urinary bladder cancer/HML3	-	3927	AB		NM_017520/-/['ICGC', 'TCGA', 'COSMIC']
Canon	O75503	CLN5	13	77566309	223	T	C	75	W	R	benign	DOID:1781 / thyroid cancer/MER4	-	4003	GE	HEPSI	NM_006493/-/['COSMIC', 'ICGC']
Canon	O75503	CLN5	13	77566343	257	T	G	86	V	G	benign	DOID:1781 / thyroid cancer/MER4	-	4003	GE	HEPSI	NM_006493/-/['ICGC', 'COSMIC']
NonCanon	Q8NH41	OR4K15	14	20443680	3	G	T	1	M	I	benign	DOID:3953 / adrenal gland cancer/HERVIP	-	4062	GE	HERVIPADP	NM_001005486/-/['TCGA']
NonCanon	Q8NH41	OR4K15	14	20443688	11	C	A	4	S	X	-	DOID:219 / colon cancer/HERVIP	-	4062	GE	HERVIPADP	NM_001005486/-/['COSMIC', 'ICGC', 'TCGA']
NonCanon	Q8NH41	OR4K15	14	20443692	15	A	C	5	L	F	benign	DOID:11934 / head and neck cancer/HERVIP	-	4062	GE	HERVIPADP	NM_001005486/-/['TCGA']
NonCanon	Q8NH41	OR4K15	14	20443692	15	A	C	5	L	F	benign	DOID:0060119 / pharynx cancer/HERVIP	-	4062	GE	HERVIPADP	NM_001005486/-/['IntOGen']
NonCanon	Q8NH41	OR4K15	14	20443698	21	T	A	7	D	E	benign	DOID:2531 / hematologic cancer/HERVIP	-	4062	GE	HERVIPADP	NM_001005486/24325359/['COSMIC']
NonCanon	Q8NH41	OR4K15	14	20443711	34	C	T	12	P	S	benign	DOID:4159 / skin cancer/HERVIP	-	4062	GE	HERVIPADP	NM_001005486/-/['TCGA']
NonCanon	Q8NH41	OR4K15	14	20443712	35	C	T	12	P	L	benign	DOID:4159 / skin cancer/HERVIP	-	4062	GE	HERVIPADP	NM_001005486/-/['TCGA']
NonCanon	Q8NH41	OR4K15	14	20443715	38	T	C	13	I	T	benign	DOID:5041 / esophageal cancer/HERVIP	-	4062	GE	HERVIPADP	NM_001005486/23525077/['COSMIC']
NonCanon	Q8NH41	OR4K15	14	20443718	41	A	G	14	Q	R	possibly damaging	DOID:219 / colon cancer/HERVIP	Gain|Phosphorylation	4062	GE	HERVIPADP	NM_001005486/-/['ICGC', 'TCGA']
NonCanon	Q8NH41	OR4K15	14	20443718	41	A	C	14	Q	P	probably damaging	DOID:10534 / stomach cancer/HERVIP	-	4062	GE	HERVIPADP	NM_001005486/-/['ICGC', 'TCGA']
NonCanon	Q8NH41	OR4K15	14	20443718	41	A	G	14	Q	R	possibly damaging	DOID:1521 / cecum cancer/HERVIP	Gain|Phosphorylation	4062	GE	HERVIPADP	NM_001005486/-/['COSMIC']
NonCanon	Q8NH41	OR4K15	14	20443726	49	G	A	17	E	K	benign	DOID:4159 / skin cancer/HERVIP	-	4062	GE	HERVIPADP	NM_001005486/22842228/['COSMIC']
NonCanon	Q8NH41	OR4K15	14	20443748	71	C	T	24	S	L	possibly damaging	DOID:10283 / prostate cancer/HERVIP	-	4062	GE	HERVIPADP	NM_001005486/22610119/['COSMIC']
NonCanon	Q8NH41	OR4K15	14	20443756	79	G	A	27	E	K	benign	DOID:4159 / skin cancer/HERVIP	Loss|+1 from N-linked Glycosylation	4062	GE	HERVIPADP	NM_001005486/22842228/['COSMIC']
NonCanon	Q8NH41	OR4K15	14	20443765	88	C	T	30	H	Y	benign	DOID:4159 / skin cancer/HERVIP	Gain|Phosphorylation	4062	GE	HERVIPADP	NM_001005486/-/['ICGC', 'TCGA']
NonCanon	Q8NH41	OR4K15	14	20443771	94	C	T	32	R	W	benign	DOID:363 / uterine cancer/HERVIP	-	4062	GE	HERVIPADP	NM_001005486/-/['COSMIC', 'TCGA']
NonCanon	Q8NH41	OR4K15	14	20443780	103	G	A	35	E	K	benign	DOID:4159 / skin cancer/HERVIP	-	4062	GE	HERVIPADP	NM_001005486/-/['ICGC', 'TCGA']
NonCanon	Q8NH41	OR4K15	14	20443780	103	G	A	35	E	K	benign	DOID:11934 / head and neck cancer/HERVIP	-	4062	GE	HERVIPADP	NM_001005486/-/['TCGA']
NonCanon	Q8NH41	OR4K15	14	20443780	103	G	A	35	E	K	benign	DOID:0060119 / pharynx cancer/HERVIP	-	4062	GE	HERVIPADP	NM_001005486/-/['IntOGen']
NonCanon	Q8NH41	OR4K15	14	20443786	109	G	T	37	V	L	benign	DOID:1324 / lung cancer/HERVIP	-	4062	GE	HERVIPADP	NM_001005486/22980975/['COSMIC']
NonCanon	Q8NH41	OR4K15	14	20443793	116	T	A	39	L	Q	possibly damaging	DOID:1324 / lung cancer/HERVIP	-	4062	GE	HERVIPADP	NM_001005486/-/['IntOGen', 'COSMIC']
NonCanon	Q8NH41	OR4K15	14	20443795	118	G	A	40	G	R	probably damaging	DOID:11934 / head and neck cancer/HERVIP	Gain|Phosphorylation	4062	GE	HERVIPADP	NM_001005486/-/['TCGA']
NonCanon	Q8NH41	OR4K15	14	20443810	133	A	T	45	R	W	benign	DOID:1324 / lung cancer/HERVIP	Gain|Phosphorylation	4062	GE	HERVIPADP	NM_001005486/-/['IntOGen']	NM_001005486/22941189/['COSMIC']
NonCanon	Q8NH41	OR4K15	14	20443846	169	C	A	57	L	I	benign	DOID:1612 / breast cancer/HERVIP	-	4062	GE	HERVIPADP	NM_001005486/-/['IntOGen', 'ICGC', 'COSMIC', 'TCGA']
NonCanon	Q8NH41	OR4K15	14	20443861	184	A	C	62	I	L	benign	DOID:1324 / lung cancer/HERVIP	Gain|Phosphorylation	4062	GE	HERVIPADP	NM_001005486/-/['COSMIC']
NonCanon	Q8NH41	OR4K15	14	20443871	194	G	T	65	G	V	probably damaging	DOID:1324 / lung cancer/HERVIP	Gain|Phosphorylation	4062	GE	HERVIPADP	NM_001005486/-/['COSMIC', 'IntOGen', 'ICGC', 'TCGA']
NonCanon	Q8NH41	OR4K15	14	20443879	202	C	G	68	L	V	probably damaging	DOID:1324 / lung cancer/HERVIP	-	4062	GE	HERVIPADP	NM_001005486/-/['COSMIC', 'IntOGen', 'ICGC', 'TCGA']
NonCanon	Q8NH41	OR4K15	14	20443918	241	A	G	81	T	A	benign	DOID:363 / uterine cancer/HERVIP	-	4062	GE	HERVIPADP	NM_001005486/-/['TCGA', 'COSMIC']
NonCanon	Q8NH41	OR4K15	14	20443925	248	T	G	83	M	R	probably damaging	DOID:10534 / stomach cancer/HERVIP	Gain|Phosphorylation	4062	GE	HERVIPADP	NM_001005486/-/['ICGC', 'TCGA']
NonCanon	Q8NH41	OR4K15	14	20443943	266	A	G	89	N	S	probably damaging	DOID:219 / colon cancer/HERVIP	-	4062	GE	HERVIPADP	NM_001005486/-/['COSMIC', 'ICGC', 'TCGA']
NonCanon	Q8NH41	OR4K15	14	20443973	296	C	A	99	S	Y	possibly damaging	DOID:1612 / breast cancer/HERVIP	-	4062	GE	HERVIPADP	NM_001005486/-/['ICGC', 'COSMIC', 'TCGA']
NonCanon	Q8NH41	OR4K15	14	20443997	320	C	T	107	A	V	benign	DOID:1324 / lung cancer/HERVIP	-	4062	GE	HERVIPADP	NM_001005486/-/['IntOGen']
NonCanon	Q8NH41	OR4K15	14	20444012	335	A	T	112	E	V	possibly damaging	DOID:219 / colon cancer/HERVIP	-	4062	GE	HERVIPADP	NM_001005486/-/['COSMIC', 'ICGC', 'TCGA']
NonCanon	Q8NH41	OR4K15	14	20444013	336	G	C	112	E	D	benign	DOID:1324 / lung cancer/HERVIP	-	4062	GE	HERVIPADP	NM_001005486/22980975/['COSMIC']
NonCanon	Q8NH41	OR4K15	14	20444014	337	C	T	113	R	C	benign	DOID:10283 / prostate cancer/HERVIP	-	4062	GE	HERVIPADP	NM_001005486/-/['ICGC', 'TCGA', 'COSMIC']
NonCanon	Q8NH41	OR4K15	14	20444015	338	G	A	113	R	H	benign	DOID:219 / colon cancer/HERVIP	-	4062	GE	HERVIPADP	NM_001005486/-/['COSMIC']
NonCanon	Q8NH41	OR4K15	14	20444015	338	G	A	113	R	H	benign	DOID:11934 / head and neck cancer/HERVIP	-	4062	GE	HERVIPADP	NM_001005486/-/['TCGA']
NonCanon	Q8NH41	OR4K15	14	20444015	338	G	A	113	R	H	benign	DOID:0060119 / pharynx cancer/HERVIP	-	4062	GE	HERVIPADP	NM_001005486/-/['IntOGen']
NonCanon	Q8NH41	OR4K15	14	20444026	349	T	G	117	S	A	probably damaging	DOID:219 / colon cancer/HERVIP	-	4062	GE	HERVIPADP	NM_001005486/-/['COSMIC', 'ICGC', 'TCGA']
NonCanon	Q8NH41	OR4K15	14	20444027	350	C	T	117	S	F	possibly damaging	DOID:4159 / skin cancer/HERVIP	-	4062	GE	HERVIPADP	NM_001005486/-/['TCGA']
NonCanon	Q8NH41	OR4K15	14	20444039	362	G	C	121	C	S	probably damaging	DOID:2531 / hematologic cancer/HERVIP	-	4062	GE	HERVIPADP	NM_001005486/-/['ICGC']
NonCanon	Q8NH41	OR4K15	14	20444044	367	G	T	123	A	S	benign	DOID:1324 / lung cancer/HERVIP	-	4062	GE	HERVIPADP	NM_001005486/22980975/['COSMIC']
NonCanon	Q8NH41	OR4K15	14	20444053	376	T	C	126	F	L	probably damaging	DOID:219 / colon cancer/HERVIP	-	4062	GE	HERVIPADP	NM_001005486/-/['COSMIC']
NonCanon	Q8NH41	OR4K15	14	20444053	376	T	A	126	F	I	probably damaging	DOID:10534 / stomach cancer/HERVIP	-	4062	GE	HERVIPADP	NM_001005486/-/['ICGC', 'TCGA']
NonCanon	Q8NH41	OR4K15	14	20444054	377	T	C	126	F	S	probably damaging	DOID:219 / colon cancer/HERVIP	Gain|Phosphorylation	4062	GE	HERVIPADP	NM_001005486/-/['COSMIC']
NonCanon	Q8NH41	OR4K15	14	20444054	377	T	A	126	F	Y	probably damaging	DOID:2394 / ovarian cancer/HERVIP	-	4062	GE	HERVIPADP	NM_001005486/21720365/['COSMIC']	NM_001005486/-/['IntOGen']
NonCanon	Q8NH41	OR4K15	14	20444063	386	A	G	129	H	R	probably damaging	DOID:263 / kidney cancer/HERVIP	-	4062	GE	HERVIPADP	NM_001005486/-/['COSMIC']
NonCanon	Q8NH41	OR4K15	14	20444072	395	C	G	132	T	S	benign	DOID:1324 / lung cancer/HERVIP	Gain|Phosphorylation	4062	GE	HERVIPADP	NM_001005486/22941188/['COSMIC']	NM_001005486/-/['IntOGen']
NonCanon	Q8NH41	OR4K15	14	20444080	403	G	A	135	E	K	probably damaging	DOID:4159 / skin cancer/HERVIP	-	4062	GE	HERVIPADP	NM_001005486/22842228/['COSMIC', 'COSMIC']
NonCanon	Q8NH41	OR4K15	14	20444089	412	C	T	138	L	F	benign	DOID:219 / colon cancer/HERVIP	-	4062	GE	HERVIPADP	NM_001005486/22810696/['COSMIC']
NonCanon	Q8NH41	OR4K15	14	20444099	422	C	T	141	S	F	benign	DOID:219 / colon cancer/HERVIP	-	4062	GE	HERVIPADP	NM_001005486/22810696/['COSMIC']
NonCanon	Q8NH41	OR4K15	14	20444111	434	A	T	145	D	V	probably damaging	DOID:1612 / breast cancer/HERVIP	-	4062	GE	HERVIPADP	NM_001005486/-/['COSMIC', 'IntOGen', 'ICGC', 'TCGA']
NonCanon	Q8NH41	OR4K15	14	20444114	437	G	A	146	R	H	possibly damaging	DOID:4362 / cervical cancer/HERVIP	-	4062	GE	HERVIPADP	NM_001005486/-/['TCGA']
NonCanon	Q8NH41	OR4K15	14	20444116	439	T	A	147	Y	N	probably damaging	DOID:1324 / lung cancer/HERVIP	-	4062	GE	HERVIPADP	NM_001005486/-/['IntOGen']
NonCanon	Q8NH41	OR4K15	14	20444145	468	C	A	156	Y	X	-	DOID:1324 / lung cancer/HERVIP	-	4062	GE	HERVIPADP	NM_001005486/-/['IntOGen', 'ICGC', 'COSMIC', 'TCGA']
NonCanon	Q8NH41	OR4K15	14	20444148	471	G	A	157	M	I	benign	DOID:4159 / skin cancer/HERVIP	Gain|Phosphorylation	4062	GE	HERVIPADP	NM_001005486/-/['ICGC', 'TCGA']
NonCanon	Q8NH41	OR4K15	14	20444161	484	C	G	162	R	G	possibly damaging	DOID:1324 / lung cancer/HERVIP	-	4062	GE	HERVIPADP	NM_001005486/23033341/['COSMIC']	NM_001005486/20505728/['COSMIC']
NonCanon	Q8NH41	OR4K15	14	20444168	491	T	C	164	V	A	benign	DOID:3571 / liver cancer/HERVIP	-	4062	GE	HERVIPADP	NM_001005486/-/['COSMIC', 'ICGC']
NonCanon	Q8NH41	OR4K15	14	20444176	499	G	T	167	V	L	benign	DOID:263 / kidney cancer/HERVIP	-	4062	GE	HERVIPADP	NM_001005486/23797736/['COSMIC']
NonCanon	Q8NH41	OR4K15	14	20444186	509	T	C	170	L	P	possibly damaging	DOID:11934 / head and neck cancer/HERVIP	-	4062	GE	HERVIPADP	NM_001005486/-/['TCGA']
NonCanon	Q8NH41	OR4K15	14	20444186	509	T	C	170	L	P	possibly damaging	DOID:0060119 / pharynx cancer/HERVIP	-	4062	GE	HERVIPADP	NM_001005486/-/['IntOGen']
NonCanon	Q8NH41	OR4K15	14	20444192	515	C	T	172	S	L	probably damaging	DOID:4159 / skin cancer/HERVIP	-	4062	GE	HERVIPADP	NM_001005486/-/['ICGC', 'TCGA']
NonCanon	Q8NH41	OR4K15	14	20444219	542	C	T	181	T	I	benign	DOID:263 / kidney cancer/HERVIP	-	4062	GE	HERVIPADP	NM_001005486/-/['COSMIC', 'IntOGen', 'ICGC', 'TCGA']
NonCanon	Q8NH41	OR4K15	14	20444245	568	C	G	190	L	V	probably damaging	DOID:11934 / head and neck cancer/HERVIP	-	4062	GE	HERVIPADP	NM_001005486/-/['TCGA']
NonCanon	Q8NH41	OR4K15	14	20444245	568	C	G	190	L	V	probably damaging	DOID:0060119 / pharynx cancer/HERVIP	-	4062	GE	HERVIPADP	NM_001005486/-/['IntOGen']
NonCanon	Q8NH41	OR4K15	14	20444260	583	C	T	195	P	S	probably damaging	DOID:4159 / skin cancer/HERVIP	Gain|Phosphorylation	4062	GE	HERVIPADP	NM_001005486/-/['ICGC', 'TCGA']
NonCanon	Q8NH41	OR4K15	14	20444261	584	C	A	195	P	H	probably damaging	DOID:1993 / rectum cancer/HERVIP	-	4062	GE	HERVIPADP	NM_001005486/22810696/['COSMIC']
NonCanon	Q8NH41	OR4K15	14	20444290	613	C	T	205	L	F	probably damaging	DOID:4159 / skin cancer/HERVIP	Gain|Phosphorylation	4062	GE	HERVIPADP	NM_001005486/-/['ICGC', 'TCGA']
NonCanon	Q8NH41	OR4K15	14	20444293	616	C	T	206	P	S	probably damaging	DOID:4159 / skin cancer/HERVIP	-	4062	GE	HERVIPADP	NM_001005486/-/['ICGC', 'TCGA']
NonCanon	Q8NH41	OR4K15	14	20444294	617	C	T	206	P	L	possibly damaging	DOID:4159 / skin cancer/HERVIP	-	4062	GE	HERVIPADP	NM_001005486/22842228/['COSMIC']
NonCanon	Q8NH41	OR4K15	14	20444303	626	C	A	209	T	N	probably damaging	DOID:1324 / lung cancer/HERVIP	-	4062	GE	HERVIPADP	NM_001005486/-/['IntOGen', 'ICGC', 'TCGA', 'COSMIC']
NonCanon	Q8NH41	OR4K15	14	20444306	629	A	C	210	K	T	benign	DOID:10534 / stomach cancer/HERVIP	-	4062	GE	HERVIPADP	NM_001005486/-/['ICGC', 'TCGA']
NonCanon	Q8NH41	OR4K15	14	20444323	646	A	T	216	T	S	benign	DOID:363 / uterine cancer/HERVIP	-	4062	GE	HERVIPADP	NM_001005486/-/['COSMIC', 'IntOGen', 'TCGA']
NonCanon	Q8NH41	OR4K15	14	20444324	647	C	T	216	T	I	benign	DOID:4159 / skin cancer/HERVIP	-	4062	GE	HERVIPADP	NM_001005486/-/['TCGA']
NonCanon	Q8NH41	OR4K15	14	20444332	655	G	A	219	V	I	benign	DOID:363 / uterine cancer/HERVIP	-	4062	GE	HERVIPADP	NM_001005486/-/['COSMIC', 'TCGA']
NonCanon	Q8NH41	OR4K15	14	20444345	668	T	G	223	I	R	probably damaging	DOID:1324 / lung cancer/HERVIP	-	4062	GE	HERVIPADP	NM_001005486/-/['COSMIC']
NonCanon	Q8NH41	OR4K15	14	20444355	678	T	A	226	D	E	benign	DOID:3953 / adrenal gland cancer/HERVIP	-	4062	GE	HERVIPADP	NM_001005486/-/['TCGA']
NonCanon	Q8NH41	OR4K15	14	20444368	691	T	C	231	S	P	probably damaging	DOID:4159 / skin cancer/HERVIP	-	4062	GE	HERVIPADP	NM_001005486/-/['ICGC', 'TCGA']
NonCanon	Q8NH41	OR4K15	14	20444378	701	C	T	234	S	F	benign	DOID:4159 / skin cancer/HERVIP	-	4062	GE	HERVIPADP	NM_001005486/22842228/['COSMIC']	NM_001005486/-/['ICGC', 'TCGA']
NonCanon	Q8NH41	OR4K15	14	20444378	701	C	T	234	S	F	benign	DOID:1319 / brain cancer/HERVIP	-	4062	GE	HERVIPADP	NM_001005486/-/['ICGC', 'TCGA']
NonCanon	Q8NH41	OR4K15	14	20444383	706	C	A	236	L	I	benign	DOID:1324 / lung cancer/HERVIP	-	4062	GE	HERVIPADP	NM_001005486/-/['COSMIC']
NonCanon	Q8NH41	OR4K15	14	20444383	706	C	A	236	L	I	benign	DOID:219 / colon cancer/HERVIP	-	4062	GE	HERVIPADP	NM_001005486/-/['IntOGen']
NonCanon	Q8NH41	OR4K15	14	20444383	706	C	T	236	L	F	benign	DOID:11934 / head and neck cancer/HERVIP	-	4062	GE	HERVIPADP	NM_001005486/-/['TCGA']
NonCanon	Q8NH41	OR4K15	14	20444383	706	C	A	236	L	I	benign	DOID:363 / uterine cancer/HERVIP	-	4062	GE	HERVIPADP	NM_001005486/-/['COSMIC', 'TCGA']
NonCanon	Q8NH41	OR4K15	14	20444383	706	C	A	236	L	I	benign	DOID:1521 / cecum cancer/HERVIP	-	4062	GE	HERVIPADP	NM_001005486/-/['COSMIC']
NonCanon	Q8NH41	OR4K15	14	20444410	733	A	G	245	I	V	benign	DOID:363 / uterine cancer/HERVIP	-	4062	GE	HERVIPADP	NM_001005486/-/['COSMIC', 'IntOGen', 'TCGA']
NonCanon	Q8NH41	OR4K15	14	20444431	754	C	T	252	R	C	probably damaging	DOID:10534 / stomach cancer/HERVIP	Gain|Phosphorylation	4062	GE	HERVIPADP	NM_001005486/-/['ICGC', 'TCGA']
NonCanon	Q8NH41	OR4K15	14	20444441	764	C	A	255	A	E	benign	DOID:4362 / cervical cancer/HERVIP	Gain|Glycosylation	4062	GE	HERVIPADP	NM_001005486/-/['TCGA']
NonCanon	Q8NH41	OR4K15	14	20444458	781	C	A	261	R	S	possibly damaging	DOID:1324 / lung cancer/HERVIP	Gain|Phosphorylation	4062	GE	HERVIPADP	NM_001005486/22941189/['COSMIC']	NM_001005486/-/['IntOGen']
NonCanon	Q8NH41	OR4K15	14	20444458	781	C	G	261	R	G	possibly damaging	DOID:1324 / lung cancer/HERVIP	Gain|Phosphorylation	4062	GE	HERVIPADP	NM_001005486/-/['COSMIC']
NonCanon	Q8NH41	OR4K15	14	20444458	781	C	T	261	R	C	benign	DOID:10534 / stomach cancer/HERVIP	Gain|Phosphorylation	4062	GE	HERVIPADP	NM_001005486/-/['ICGC', 'TCGA']
NonCanon	Q8NH41	OR4K15	14	20444459	782	G	T	261	R	L	benign	DOID:1324 / lung cancer/HERVIP	Gain|Phosphorylation	4062	GE	HERVIPADP	NM_001005486/-/['IntOGen', 'ICGC', 'TCGA', 'COSMIC']
NonCanon	Q8NH41	OR4K15	14	20444459	782	G	A	261	R	H	probably damaging	DOID:219 / colon cancer/HERVIP	Gain|Phosphorylation	4062	GE	HERVIPADP	NM_001005486/22895193/['COSMIC']
NonCanon	Q8NH41	OR4K15	14	20444468	791	T	C	264	L	S	probably damaging	DOID:10534 / stomach cancer/HERVIP	Gain|Phosphorylation	4062	GE	HERVIPADP	NM_001005486/-/['COSMIC', 'ICGC']
NonCanon	Q8NH41	OR4K15	14	20444477	800	A	G	267	H	R	probably damaging	DOID:2531 / hematologic cancer/HERVIP	Gain|Phosphorylation	4062	GE	HERVIPADP	NM_001005486/-/['ICGC', 'COSMIC']
NonCanon	Q8NH41	OR4K15	14	20444481	804	C	G	268	I	M	probably damaging	DOID:10534 / stomach cancer/HERVIP	-	4062	GE	HERVIPADP	NM_001005486/22037554/['COSMIC']	NM_001005486/-/['IntOGen']
NonCanon	Q8NH41	OR4K15	14	20444538	861	C	A	287	S	R	benign	DOID:11934 / head and neck cancer/HERVIP	Gain|Phosphorylation	4062	GE	HERVIPADP	NM_001005486/-/['TCGA']
NonCanon	Q8NH41	OR4K15	14	20444539	862	A	G	288	S	G	benign	DOID:11934 / head and neck cancer/HERVIP	-	4062	GE	HERVIPADP	NM_001005486/-/['TCGA']
NonCanon	Q8NH41	OR4K15	14	20444546	869	C	T	290	S	L	benign	DOID:1324 / lung cancer/HERVIP	-	4062	GE	HERVIPADP	NM_001005486/22980975/['COSMIC']
NonCanon	Q8NH41	OR4K15	14	20444551	874	G	T	292	D	Y	probably damaging	DOID:1793 / pancreatic cancer/HERVIP	-	4062	GE	HERVIPADP	NM_001005486/-/['TCGA']
NonCanon	Q8NH41	OR4K15	14	20444555	878	A	T	293	K	I	probably damaging	DOID:3571 / liver cancer/HERVIP	-	4062	GE	HERVIPADP	NM_001005486/-/['COSMIC', 'ICGC']
NonCanon	Q8NH41	OR4K15	14	20444560	883	C	G	295	L	V	possibly damaging	DOID:10534 / stomach cancer/HERVIP	-	4062	GE	HERVIPADP	NM_001005486/-/['ICGC', 'TCGA']
NonCanon	Q8NH41	OR4K15	14	20444584	907	A	G	303	T	A	probably damaging	DOID:1521 / cecum cancer/HERVIP	-	4062	GE	HERVIPADP	NM_001005486/-/['COSMIC']
NonCanon	Q8NH41	OR4K15	14	20444588	911	T	C	304	L	P	benign	DOID:219 / colon cancer/HERVIP	Gain|Phosphorylation	4062	GE	HERVIPADP	NM_001005486/-/['COSMIC', 'ICGC', 'TCGA']
NonCanon	Q8NH41	OR4K15	14	20444603	926	T	C	309	V	A	benign	DOID:1324 / lung cancer/HERVIP	-	4062	GE	HERVIPADP	NM_001005486/22980975/['COSMIC']
NonCanon	Q8NH41	OR4K15	14	20444607	930	C	G	310	I	M	probably damaging	DOID:219 / colon cancer/HERVIP	Gain|Phosphorylation	4062	GE	HERVIPADP	NM_001005486/-/['COSMIC', 'ICGC', 'TCGA']
NonCanon	Q8NH41	OR4K15	14	20444607	930	C	G	310	I	M	probably damaging	DOID:4362 / cervical cancer/HERVIP	Gain|Phosphorylation	4062	GE	HERVIPADP	NM_001005486/-/['TCGA']
NonCanon	Q8NH41	OR4K15	14	20444612	935	C	A	312	T	K	probably damaging	DOID:4159 / skin cancer/HERVIP	-	4062	GE	HERVIPADP	NM_001005486/22842228/['COSMIC']
NonCanon	Q8NH41	OR4K15	14	20444625	948	A	T	316	K	N	possibly damaging	DOID:2394 / ovarian cancer/HERVIP	Gain|Phosphorylation	4062	GE	HERVIPADP	NM_001005486/-/['COSMIC', 'ICGC']
NonCanon	Q8NH41	OR4K15	14	20444630	953	T	C	318	V	A	possibly damaging	DOID:1324 / lung cancer/HERVIP	-	4062	GE	HERVIPADP	NM_001005486/-/['COSMIC', 'IntOGen', 'ICGC', 'TCGA']
NonCanon	Q8NH41	OR4K15	14	20444639	962	C	T	321	A	V	possibly damaging	DOID:363 / uterine cancer/HERVIP	Gain|Phosphorylation	4062	GE	HERVIPADP	NM_001005486/-/['COSMIC', 'TCGA']
NonCanon	Q8NH41	OR4K15	14	20444671	994	C	A	332	P	T	benign	DOID:1324 / lung cancer/HERVIP	Gain|Phosphorylation	4062	GE	HERVIPADP	NM_001005486/22980975/['COSMIC']
NonCanon	Q8NH41	OR4K15	14	20444672	995	C	A	332	P	H	possibly damaging	DOID:363 / uterine cancer/HERVIP	Gain|Phosphorylation	4062	GE	HERVIPADP	NM_001005486/-/['COSMIC', 'IntOGen', 'TCGA']
NonCanon	Q8NH41	OR4K15	14	20444677	1000	C	T	334	Q	X	-	DOID:4159 / skin cancer/HERVIP	-	4062	GE	HERVIPADP	NM_001005486/-/['ICGC', 'TCGA']
NonCanon	Q8NH41	OR4K15	14	20444695	1018	A	G	340	R	G	benign	DOID:5041 / esophageal cancer/HERVIP	-	4062	GE	HERVIPADP	NM_001005486/23525077/['COSMIC']
NonCanon	Q8NH41	OR4K15	14	20444720	1043	A	T	348	K	M	possibly damaging	DOID:1324 / lung cancer/HERVIP	-	4062	GE	HERVIPADP	NM_001005486/-/['IntOGen', 'ICGC', 'COSMIC', 'TCGA']
NonCanon	Q8ND90	PNMA1	14	74179322	1021	G	A	341	E	K	probably damaging	DOID:1612 / breast cancer/HERVH	-	4184	GE	HERVHF	NM_006029/22722201/['COSMIC']	NM_006029/-/['IntOGen', 'ICGC']
NonCanon	Q8ND90	PNMA1	14	74179342	1001	A	C	334	K	T	benign	DOID:219 / colon cancer/HERVH	-	4184	GE	HERVHF	NM_006029/22895193/['COSMIC']
NonCanon	Q8ND90	PNMA1	14	74179357	986	G	A	329	R	H	probably damaging	DOID:363 / uterine cancer/HERVH	-	4184	GE	HERVHF	NM_006029/-/['IntOGen', 'TCGA', 'COSMIC']
NonCanon	Q8ND90	PNMA1	14	74179405	938	C	A	313	A	D	benign	DOID:2394 / ovarian cancer/HERVH	-	4184	GE	HERVHF	NM_006029/21720365/['COSMIC']	NM_006029/-/['IntOGen']
NonCanon	Q8ND90	PNMA1	14	74179418	925	T	C	309	W	R	benign	DOID:1324 / lung cancer/HERVH	-	4184	GE	HERVHF	NM_006029/-/['IntOGen']	NM_006029/22941189/['COSMIC']
NonCanon	Q8ND90	PNMA1	14	74179475	868	C	T	290	R	C	probably damaging	DOID:219 / colon cancer/HERVH	-	4184	GE	HERVHF	NM_006029/-/['COSMIC', 'ICGC', 'TCGA']
NonCanon	Q8ND90	PNMA1	14	74179538	805	G	A	269	E	K	probably damaging	DOID:263 / kidney cancer/HERVH	-	4184	GE	HERVHF	NM_006029/-/['TCGA', 'COSMIC']
NonCanon	Q8ND90	PNMA1	14	74179616	727	T	C	243	S	P	benign	DOID:263 / kidney cancer/HERVH	-	4184	GE	HERVHF	NM_006029/23797736/['COSMIC']
NonCanon	Q8ND90	PNMA1	14	74179621	722	A	G	241	E	G	probably damaging	DOID:11934 / head and neck cancer/HERVH	-	4184	GE	HERVHF	NM_006029/-/['TCGA']
NonCanon	Q8ND90	PNMA1	14	74179621	722	A	G	241	E	G	probably damaging	DOID:0060119 / pharynx cancer/HERVH	-	4184	GE	HERVHF	NM_006029/-/['IntOGen']
NonCanon	Q8ND90	PNMA1	14	74179622	721	G	C	241	E	Q	probably damaging	DOID:11054 / urinary bladder cancer/HERVH	-	4184	GE	HERVHF	NM_006029/-/['COSMIC', 'IntOGen', 'ICGC', 'TCGA']
NonCanon	Q8ND90	PNMA1	14	74179643	700	G	C	234	E	Q	benign	DOID:4362 / cervical cancer/HERVH	-	4184	GE	HERVHF	NM_006029/-/['TCGA']
NonCanon	Q8ND90	PNMA1	14	74179661	682	G	A	228	E	K	probably damaging	DOID:219 / colon cancer/HERVH	-	4184	GE	HERVHF	NM_006029/-/['ICGC', 'TCGA']
NonCanon	Q8ND90	PNMA1	14	74179661	682	G	A	228	E	K	probably damaging	DOID:1521 / cecum cancer/HERVH	-	4184	GE	HERVHF	NM_006029/-/['COSMIC']
NonCanon	Q8ND90	PNMA1	14	74179673	670	A	G	224	I	V	possibly damaging	DOID:363 / uterine cancer/HERVH	-	4184	GE	HERVHF	NM_006029/-/['COSMIC', 'TCGA']
NonCanon	Q8ND90	PNMA1	14	74179715	628	G	A	210	A	T	probably damaging	DOID:363 / uterine cancer/HERVH	-	4184	GE	HERVHF	NM_006029/23104009/['COSMIC']
NonCanon	Q8ND90	PNMA1	14	74179715	628	G	A	210	A	T	probably damaging	DOID:10283 / prostate cancer/HERVH	-	4184	GE	HERVHF	NM_006029/22610119/['COSMIC']
NonCanon	Q8ND90	PNMA1	14	74179741	602	G	A	201	R	Q	probably damaging	DOID:1612 / breast cancer/HERVH	-	4184	GE	HERVHF	NM_006029/-/['IntOGen', 'ICGC', 'COSMIC', 'TCGA']
NonCanon	Q8ND90	PNMA1	14	74179760	583	G	T	195	D	Y	probably damaging	DOID:4362 / cervical cancer/HERVH	Gain|Phosphorylation	4184	GE	HERVHF	NM_006029/-/['TCGA']
NonCanon	Q8ND90	PNMA1	14	74179763	580	T	G	194	S	A	benign	DOID:2531 / hematologic cancer/HERVH	-	4184	GE	HERVHF	NM_006029/-/['ICGC']
NonCanon	Q8ND90	PNMA1	14	74179765	578	T	G	193	V	G	probably damaging	DOID:1781 / thyroid cancer/HERVH	-	4184	GE	HERVHF	NM_006029/-/['COSMIC', 'ICGC']
NonCanon	Q8ND90	PNMA1	14	74179807	536	C	T	179	P	L	benign	DOID:4159 / skin cancer/HERVH	-	4184	GE	HERVHF	NM_006029/-/['ICGC', 'TCGA']
NonCanon	Q8ND90	PNMA1	14	74179820	523	G	A	175	E	K	probably damaging	DOID:263 / kidney cancer/HERVH	-	4184	GE	HERVHF	NM_006029/-/['TCGA']
NonCanon	Q8ND90	PNMA1	14	74179823	520	G	A	174	E	K	probably damaging	DOID:4362 / cervical cancer/HERVH	-	4184	GE	HERVHF	NM_006029/-/['TCGA']
NonCanon	Q8ND90	PNMA1	14	74179825	518	G	A	173	G	E	benign	DOID:4362 / cervical cancer/HERVH	-	4184	GE	HERVHF	NM_006029/-/['TCGA']
NonCanon	Q8ND90	PNMA1	14	74179835	508	C	T	170	P	S	benign	DOID:4159 / skin cancer/HERVH	-	4184	GE	HERVHF	NM_006029/-/['ICGC', 'TCGA']
NonCanon	Q8ND90	PNMA1	14	74179852	491	T	A	164	F	Y	probably damaging	DOID:4159 / skin cancer/HERVH	-	4184	GE	HERVHF	NM_006029/-/['ICGC', 'TCGA']
NonCanon	Q8ND90	PNMA1	14	74179915	428	A	G	143	Y	C	possibly damaging	DOID:363 / uterine cancer/HERVH	-	4184	GE	HERVHF	NM_006029/-/['TCGA']
NonCanon	Q8ND90	PNMA1	14	74179954	389	C	T	130	P	L	benign	DOID:10534 / stomach cancer/HERVH	Gain|Glycosylation	4184	GE	HERVHF	NM_006029/-/['ICGC', 'TCGA']
NonCanon	Q8ND90	PNMA1	14	74179954	389	C	T	130	P	L	benign	DOID:1993 / rectum cancer/HERVH	Gain|Glycosylation	4184	GE	HERVHF	NM_006029/-/['COSMIC', 'ICGC', 'TCGA']
NonCanon	Q8ND90	PNMA1	14	74179976	367	C	A	123	L	I	probably damaging	DOID:10534 / stomach cancer/HERVH	-	4184	GE	HERVHF	NM_006029/-/['ICGC', 'TCGA']
NonCanon	Q8ND90	PNMA1	14	74179982	361	C	T	121	R	C	probably damaging	DOID:10534 / stomach cancer/HERVH	-	4184	GE	HERVHF	NM_006029/-/['ICGC', 'TCGA']
NonCanon	Q8ND90	PNMA1	14	74180036	307	G	A	103	E	K	benign	DOID:11934 / head and neck cancer/HERVH	Gain|Phosphorylation	4184	GE	HERVHF	NM_006029/-/['TCGA']
NonCanon	Q8ND90	PNMA1	14	74180079	264	G	T	88	W	C	probably damaging	DOID:363 / uterine cancer/HERVH	Gain|Phosphorylation	4184	GE	HERVHF	NM_006029/-/['COSMIC', 'TCGA']
NonCanon	Q8ND90	PNMA1	14	74180095	248	G	A	83	G	D	probably damaging	DOID:363 / uterine cancer/HERVH	-	4184	GE	HERVHF	NM_006029/-/['IntOGen', 'TCGA', 'COSMIC']
NonCanon	Q8ND90	PNMA1	14	74180105	238	G	A	80	E	K	possibly damaging	DOID:4159 / skin cancer/HERVH	-	4184	GE	HERVHF	NM_006029/24838835/['COSMIC']
NonCanon	Q8ND90	PNMA1	14	74180132	211	G	T	71	A	S	benign	DOID:263 / kidney cancer/HERVH	-	4184	GE	HERVHF	NM_006029/-/['COSMIC', 'TCGA']
NonCanon	Q8ND90	PNMA1	14	74180243	100	G	A	34	E	K	probably damaging	DOID:11054 / urinary bladder cancer/HERVH	-	4184	GE	HERVHF	NM_006029/-/['COSMIC', 'IntOGen', 'ICGC', 'TCGA']
NonCanon	Q8ND90	PNMA1	14	74180287	56	G	C	19	R	T	benign	DOID:4362 / cervical cancer/HERVH	Gain|Phosphorylation	4184	GE	HERVHF	NM_006029/-/['TCGA']
NonCanon	Q8ND90	PNMA1	14	74180338	5	C	T	2	A	V	probably damaging	DOID:4159 / skin cancer/HERVH	-	4184	GE	HERVHF	NM_006029/23856246/['COSMIC']
NonCanon	Q8ND90	PNMA1	14	74180338	5	C	T	2	A	V	probably damaging	DOID:11934 / head and neck cancer/HERVH	-	4184	GE	HERVHF	NM_006029/-/['TCGA']
NonCanon	Q9UPI3	FLVCR2	14	76045320	5	T	G	2	V	G	benign	DOID:219 / colon cancer/HERVH	-	4185	GE	HERVHF	NM_017791/-/['IntOGen']
NonCanon	Q9UPI3	FLVCR2	14	76045320	5	T	G	2	V	G	benign	DOID:1521 / cecum cancer/HERVH	-	4185	GE	HERVHF	NM_017791/22810696/['COSMIC']
NonCanon	Q9UPI3	FLVCR2	14	76045362	47	T	C	16	V	A	benign	DOID:4362 / cervical cancer/HERVH	-	4185	GE	HERVHF	NM_017791/-/['TCGA']
NonCanon	Q9UPI3	FLVCR2	14	76045385	70	G	A	24	D	N	benign	DOID:4159 / skin cancer/HERVH	Gain|Glycosylation	4185	GE	HERVHF	NM_017791/-/['TCGA']
NonCanon	Q9UPI3	FLVCR2	14	76045412	97	G	A	33	V	I	benign	DOID:219 / colon cancer/HERVH	Gain|Phosphorylation	4185	GE	HERVHF	NM_017791/-/['COSMIC']
NonCanon	Q9UPI3	FLVCR2	14	76045412	97	G	A	33	V	I	benign	DOID:10534 / stomach cancer/HERVH	Gain|Phosphorylation	4185	GE	HERVHF	NM_017791/-/['ICGC', 'TCGA']
NonCanon	Q9UPI3	FLVCR2	14	76045416	101	C	T	34	S	L	probably damaging	DOID:4159 / skin cancer/HERVH	-	4185	GE	HERVHF	NM_017791/-/['ICGC', 'TCGA']
NonCanon	Q9UPI3	FLVCR2	14	76045418	103	G	A	35	V	I	benign	DOID:219 / colon cancer/HERVH	Gain|Phosphorylation	4185	GE	HERVHF	NM_017791/-/['COSMIC', 'ICGC', 'TCGA']
NonCanon	Q9UPI3	FLVCR2	14	76045421	106	C	A	36	H	N	benign	DOID:219 / colon cancer/HERVH	Gain|Glycosylation	4185	GE	HERVHF	NM_017791/-/['COSMIC', 'ICGC', 'TCGA']
NonCanon	Q9UPI3	FLVCR2	14	76045470	155	C	T	52	S	L	possibly damaging	DOID:363 / uterine cancer/HERVH	-	4185	GE	HERVHF	NM_017791/-/['COSMIC', 'TCGA']
NonCanon	Q9UPI3	FLVCR2	14	76045470	155	C	G	52	S	W	benign	DOID:1612 / breast cancer/HERVH	Gain|Phosphorylation	4185	GE	HERVHF	NM_017791/-/['COSMIC', 'ICGC', 'TCGA']
NonCanon	Q9UPI3	FLVCR2	14	76045476	161	A	C	54	H	P	benign	DOID:1612 / breast cancer/HERVH	Gain|Phosphorylation	4185	GE	HERVHF	NM_017791/-/['COSMIC', 'ICGC', 'TCGA']
NonCanon	Q9UPI3	FLVCR2	14	76045500	185	G	A	62	S	N	benign	DOID:363 / uterine cancer/HERVH	-	4185	GE	HERVHF	NM_017791/-/['COSMIC', 'TCGA']
NonCanon	Q9UPI3	FLVCR2	14	76045533	218	A	C	73	E	A	benign	DOID:363 / uterine cancer/HERVH	Gain|Phosphorylation	4185	GE	HERVHF	NM_017791/-/['TCGA', 'COSMIC']
NonCanon	Q9UPI3	FLVCR2	14	76045559	244	A	G	82	R	G	benign	DOID:3571 / liver cancer/HERVH	Gain|Phosphorylation	4185	GE	HERVHF	NM_017791/-/['COSMIC', 'ICGC']
NonCanon	Q9UPI3	FLVCR2	14	76045572	257	C	T	86	A	V	benign	DOID:219 / colon cancer/HERVH	Gain|Phosphorylation	4185	GE	HERVHF	NM_017791/-/['ICGC', 'TCGA']
NonCanon	Q9UPI3	FLVCR2	14	76045572	257	C	T	86	A	V	benign	DOID:1521 / cecum cancer/HERVH	Gain|Phosphorylation	4185	GE	HERVHF	NM_017791/-/['COSMIC']
NonCanon	Q9UPI3	FLVCR2	14	76045637	322	A	C	108	I	L	possibly damaging	DOID:4362 / cervical cancer/HERVH	-	4185	GE	HERVHF	NM_017791/-/['TCGA']
NonCanon	Q9UPI3	FLVCR2	14	76045685	370	G	T	124	D	Y	probably damaging	DOID:2531 / hematologic cancer/HERVH	-	4185	GE	HERVHF	NM_017791/-/['COSMIC', 'ICGC']
Canon	Q9UPI3	FLVCR2	14	76045788	473	C	T	158	S	L	possibly damaging	DOID:657 / adenoma /HERVH	Benign	4185	GE	HERVHF	NM_017791/23204322/['COSMIC']
NonCanon	Q9UPI3	FLVCR2	14	76045788	473	C	T	158	S	L	possibly damaging	DOID:1324 / lung cancer/HERVH	-	4185	GE	HERVHF	NM_017791/-/['COSMIC', 'ICGC']
NonCanon	Q9UPI3	FLVCR2	14	76045788	473	C	T	158	S	L	possibly damaging	DOID:5041 / esophageal cancer/HERVH	-	4185	GE	HERVHF	NM_017791/23525077/['COSMIC']
NonCanon	Q9UPI3	FLVCR2	14	76045896	581	T	A	194	I	N	probably damaging	DOID:11934 / head and neck cancer/HERVH	-	4185	GE	HERVHF	NM_017791/-/['TCGA']
NonCanon	Q9UPI3	FLVCR2	14	76045905	590	T	C	197	M	T	benign	DOID:219 / colon cancer/HERVH	-	4185	GE	HERVHF	NM_017791/-/['ICGC', 'COSMIC', 'TCGA']
NonCanon	P17022	ZNF18	17	11881309	1615	C	A	539	Q	K	benign	DOID:1324 / lung cancer/HERVH	-	4426	GE	HERVHF	NM_144680/-/['IntOGen']	NM_144680/22941189/['COSMIC']
NonCanon	P17022	ZNF18	17	11881349	1575	T	G	525	C	W	probably damaging	DOID:2394 / ovarian cancer/HERVH	-	4426	GE	HERVHF	NM_144680/-/['COSMIC']
NonCanon	Q8NHY0	B4GALNT2	17	47241497	994	C	T	332	R	C	probably damaging	DOID:4159 / skin cancer/HML3	Gain|Phosphorylation	4463	AB		NM_153446/-/['TCGA']
NonCanon	Q8NHY0	B4GALNT2	17	47241497	814	C	T	272	R	C	probably damaging	DOID:4159 / skin cancer/HML3	-	4463	AB		NM_001159387/-/['TCGA']
NonCanon	Q8NHY0	B4GALNT2	17	47241497	736	C	T	246	R	C	probably damaging	DOID:4159 / skin cancer/HML3	-	4463	AB		NM_001159388/-/['TCGA']
NonCanon	Q8NHY0	B4GALNT2	17	47241497	736	C	T	246	R	C	probably damaging	DOID:10534 / stomach cancer/HML3	-	4463	AB		NM_001159388/-/['ICGC', 'TCGA']
NonCanon	Q8NHY0	B4GALNT2	17	47241497	994	C	T	332	R	C	probably damaging	DOID:10534 / stomach cancer/HML3	Gain|Phosphorylation	4463	AB		NM_153446/-/['ICGC', 'TCGA']
NonCanon	Q8NHY0	B4GALNT2	17	47241497	814	C	T	272	R	C	probably damaging	DOID:10534 / stomach cancer/HML3	-	4463	AB		NM_001159387/-/['ICGC', 'TCGA']
NonCanon	Q8NHY0	B4GALNT2	17	47241498	995	G	A	332	R	H	probably damaging	DOID:2531 / hematologic cancer/HML3	Gain|Phosphorylation	4463	AB		NM_153446/23292937/['COSMIC']
NonCanon	Q8NHY0	B4GALNT2	17	47241498	815	G	A	272	R	H	probably damaging	DOID:2531 / hematologic cancer/HML3	-	4463	AB		NM_001159387/23292937/['COSMIC']
NonCanon	Q8NHY0	B4GALNT2	17	47241498	737	G	A	246	R	H	probably damaging	DOID:2531 / hematologic cancer/HML3	-	4463	AB		NM_001159388/23292937/['COSMIC']
NonCanon	Q8NHY0	B4GALNT2	17	47241498	737	G	A	246	R	H	probably damaging	DOID:11934 / head and neck cancer/HML3	-	4463	AB		NM_001159388/-/['TCGA']
NonCanon	Q8NHY0	B4GALNT2	17	47241498	995	G	A	332	R	H	probably damaging	DOID:11934 / head and neck cancer/HML3	Gain|Phosphorylation	4463	AB		NM_153446/-/['TCGA']
NonCanon	Q8NHY0	B4GALNT2	17	47241498	815	G	A	272	R	H	probably damaging	DOID:11934 / head and neck cancer/HML3	-	4463	AB		NM_001159387/-/['TCGA']
NonCanon	Q8NHY0	B4GALNT2	17	47241498	815	G	A	272	R	H	probably damaging	DOID:0060119 / pharynx cancer/HML3	-	4463	AB		NM_001159387/-/['IntOGen']
NonCanon	Q8NHY0	B4GALNT2	17	47241498	995	G	A	332	R	H	probably damaging	DOID:0060119 / pharynx cancer/HML3	Gain|Phosphorylation	4463	AB		NM_153446/-/['IntOGen']
NonCanon	Q8NHY0	B4GALNT2	17	47241498	737	G	A	246	R	H	probably damaging	DOID:0060119 / pharynx cancer/HML3	-	4463	AB		NM_001159388/-/['IntOGen']
NonCanon	Q8NHY0	B4GALNT2	17	47241500	817	C	A	273	P	T	probably damaging	DOID:263 / kidney cancer/HML3	-	4463	AB		NM_001159387/-/['COSMIC', 'IntOGen', 'ICGC', 'TCGA']
NonCanon	Q8NHY0	B4GALNT2	17	47241500	997	C	A	333	P	T	probably damaging	DOID:263 / kidney cancer/HML3	Gain|Phosphorylation	4463	AB		NM_153446/-/['COSMIC', 'IntOGen', 'ICGC', 'TCGA']
NonCanon	Q8NHY0	B4GALNT2	17	47241500	739	C	A	247	P	T	probably damaging	DOID:263 / kidney cancer/HML3	-	4463	AB		NM_001159388/-/['COSMIC', 'IntOGen', 'ICGC', 'TCGA']
NonCanon	Q8NHY0	B4GALNT2	17	47241521	838	C	T	280	L	F	probably damaging	DOID:3571 / liver cancer/HML3	-	4463	AB		NM_001159387/-/['IntOGen', 'ICGC']	NM_001159387/22561517/['COSMIC']
NonCanon	Q8NHY0	B4GALNT2	17	47241521	760	C	T	254	L	F	probably damaging	DOID:3571 / liver cancer/HML3	-	4463	AB		NM_001159388/22561517/['COSMIC']	NM_001159388/-/['IntOGen', 'ICGC']
NonCanon	Q8NHY0	B4GALNT2	17	47241521	1018	C	T	340	L	F	probably damaging	DOID:3571 / liver cancer/HML3	Gain|Phosphorylation	4463	AB		NM_153446/-/['IntOGen', 'ICGC']	NM_153446/22561517/['COSMIC']
NonCanon	Q8NHY0	B4GALNT2	17	47241524	1021	C	T	341	R	W	benign	DOID:363 / uterine cancer/HML3	Gain|Phosphorylation	4463	AB		NM_153446/-/['COSMIC', 'IntOGen', 'TCGA']
NonCanon	Q8NHY0	B4GALNT2	17	47241524	763	C	T	255	R	W	benign	DOID:363 / uterine cancer/HML3	-	4463	AB		NM_001159388/-/['COSMIC', 'IntOGen', 'TCGA']
NonCanon	Q8NHY0	B4GALNT2	17	47241524	841	C	T	281	R	W	benign	DOID:363 / uterine cancer/HML3	-	4463	AB		NM_001159387/-/['COSMIC', 'IntOGen', 'TCGA']
NonCanon	Q8NHY0	B4GALNT2	17	47241533	1030	C	T	344	R	X	-	DOID:2531 / hematologic cancer/HML3	-	4463	AB		NM_153446/23292937/['COSMIC']
NonCanon	Q8NHY0	B4GALNT2	17	47241533	772	C	T	258	R	X	-	DOID:2531 / hematologic cancer/HML3	-	4463	AB		NM_001159388/23292937/['COSMIC']
NonCanon	Q8NHY0	B4GALNT2	17	47241533	850	C	T	284	R	X	-	DOID:2531 / hematologic cancer/HML3	-	4463	AB		NM_001159387/23292937/['COSMIC']
NonCanon	Q8NHY0	B4GALNT2	17	47241534	773	G	A	258	R	Q	probably damaging	DOID:363 / uterine cancer/HML3	-	4463	AB		NM_001159388/-/['COSMIC', 'TCGA']
NonCanon	Q8NHY0	B4GALNT2	17	47241534	851	G	A	284	R	Q	probably damaging	DOID:363 / uterine cancer/HML3	-	4463	AB		NM_001159387/-/['COSMIC', 'TCGA']
NonCanon	Q8NHY0	B4GALNT2	17	47241534	1031	G	A	344	R	Q	probably damaging	DOID:363 / uterine cancer/HML3	-	4463	AB		NM_153446/-/['COSMIC', 'TCGA']
NonCanon	Q8NHY0	B4GALNT2	17	47241536	853	G	T	285	E	X	-	DOID:1324 / lung cancer/HML3	-	4463	AB		NM_001159387/-/['COSMIC', 'IntOGen', 'ICGC', 'TCGA']
NonCanon	Q8NHY0	B4GALNT2	17	47241536	1033	G	T	345	E	X	-	DOID:1324 / lung cancer/HML3	-	4463	AB		NM_153446/-/['COSMIC', 'IntOGen', 'ICGC', 'TCGA']
NonCanon	Q8NHY0	B4GALNT2	17	47241536	775	G	T	259	E	X	-	DOID:1324 / lung cancer/HML3	-	4463	AB		NM_001159388/-/['COSMIC', 'IntOGen', 'ICGC', 'TCGA']
NonCanon	Q8NHY0	B4GALNT2	17	47241548	787	G	T	263	D	Y	probably damaging	DOID:1993 / rectum cancer/HML3	-	4463	AB		NM_001159388/-/['COSMIC']
NonCanon	Q8NHY0	B4GALNT2	17	47241548	865	G	T	289	D	Y	probably damaging	DOID:1993 / rectum cancer/HML3	-	4463	AB		NM_001159387/-/['COSMIC']
NonCanon	Q8NHY0	B4GALNT2	17	47241548	1045	G	T	349	D	Y	probably damaging	DOID:1993 / rectum cancer/HML3	-	4463	AB		NM_153446/-/['COSMIC']
NonCanon	Q8NHY0	B4GALNT2	17	47241548	787	G	C	263	D	H	probably damaging	DOID:5041 / esophageal cancer/HML3	-	4463	AB		NM_001159388/23525077/['COSMIC']
NonCanon	Q8NHY0	B4GALNT2	17	47241548	1045	G	C	349	D	H	probably damaging	DOID:5041 / esophageal cancer/HML3	Gain|Phosphorylation	4463	AB		NM_153446/23525077/['COSMIC']
NonCanon	Q8NHY0	B4GALNT2	17	47241548	865	G	C	289	D	H	probably damaging	DOID:5041 / esophageal cancer/HML3	-	4463	AB		NM_001159387/23525077/['COSMIC']
NonCanon	Q8NHY0	B4GALNT2	17	47241553	870	G	C	290	L	F	probably damaging	DOID:1324 / lung cancer/HML3	-	4463	AB		NM_001159387/22980975/['COSMIC']
NonCanon	Q8NHY0	B4GALNT2	17	47241553	792	G	C	264	L	F	probably damaging	DOID:1324 / lung cancer/HML3	-	4463	AB		NM_001159388/22980975/['COSMIC']
NonCanon	Q8NHY0	B4GALNT2	17	47241553	1050	G	C	350	L	F	probably damaging	DOID:1324 / lung cancer/HML3	-	4463	AB		NM_153446/22980975/['COSMIC']
NonCanon	Q8NHY0	B4GALNT2	17	47241557	874	G	A	292	V	I	possibly damaging	DOID:1793 / pancreatic cancer/HML3	-	4463	AB		NM_001159387/-/['TCGA']
NonCanon	Q8NHY0	B4GALNT2	17	47241557	1054	G	A	352	V	I	possibly damaging	DOID:1793 / pancreatic cancer/HML3	Gain|Phosphorylation	4463	AB		NM_153446/-/['TCGA']
NonCanon	Q8NHY0	B4GALNT2	17	47241557	796	G	A	266	V	I	possibly damaging	DOID:1793 / pancreatic cancer/HML3	-	4463	AB		NM_001159388/-/['TCGA']
NonCanon	Q8NHY0	B4GALNT2	17	47241563	802	G	T	268	V	L	possibly damaging	DOID:4362 / cervical cancer/HML3	-	4463	AB		NM_001159388/-/['TCGA']
NonCanon	Q8NHY0	B4GALNT2	17	47241563	880	G	T	294	V	L	possibly damaging	DOID:4362 / cervical cancer/HML3	-	4463	AB		NM_001159387/-/['TCGA']
NonCanon	Q8NHY0	B4GALNT2	17	47241563	1060	G	T	354	V	L	possibly damaging	DOID:4362 / cervical cancer/HML3	Gain|Phosphorylation	4463	AB		NM_153446/-/['TCGA']
NonCanon	Q8NHY0	B4GALNT2	17	47241594	1091	T	C	364	I	T	probably damaging	DOID:10534 / stomach cancer/HML3	-	4463	AB		NM_153446/-/['ICGC', 'TCGA']
NonCanon	Q8NHY0	B4GALNT2	17	47241594	911	T	C	304	I	T	probably damaging	DOID:10534 / stomach cancer/HML3	-	4463	AB		NM_001159387/-/['ICGC', 'TCGA']
NonCanon	Q8NHY0	B4GALNT2	17	47241594	833	T	C	278	I	T	probably damaging	DOID:10534 / stomach cancer/HML3	-	4463	AB		NM_001159388/-/['ICGC', 'TCGA']
NonCanon	Q8NHY0	B4GALNT2	17	47241632	871	G	A	291	G	R	probably damaging	DOID:1324 / lung cancer/HML3	-	4463	AB		NM_001159388/-/['COSMIC']
NonCanon	Q8NHY0	B4GALNT2	17	47241632	1129	G	A	377	G	R	probably damaging	DOID:1324 / lung cancer/HML3	-	4463	AB		NM_153446/-/['COSMIC']
NonCanon	Q8NHY0	B4GALNT2	17	47241632	949	G	A	317	G	R	probably damaging	DOID:1324 / lung cancer/HML3	-	4463	AB		NM_001159387/-/['COSMIC']
NonCanon	Q8NHY0	B4GALNT2	17	47241635	1132	A	G	378	K	E	probably damaging	DOID:1324 / lung cancer/HML3	-	4463	AB		NM_153446/-/['IntOGen']	NM_153446/22941189/['COSMIC']
NonCanon	Q8NHY0	B4GALNT2	17	47241635	952	A	G	318	K	E	probably damaging	DOID:1324 / lung cancer/HML3	-	4463	AB		NM_001159387/-/['IntOGen']	NM_001159387/22941189/['COSMIC']
NonCanon	Q8NHY0	B4GALNT2	17	47241635	874	A	G	292	K	E	probably damaging	DOID:1324 / lung cancer/HML3	-	4463	AB		NM_001159388/22941189/['COSMIC']	NM_001159388/-/['IntOGen']
NonCanon	Q8NHY0	B4GALNT2	17	47243489	890	G	A	297	G	D	probably damaging	DOID:219 / colon cancer/HML3	-	4463	AB		NM_001159388/22895193/['COSMIC']
NonCanon	Q8NHY0	B4GALNT2	17	47243489	1148	G	A	383	G	D	probably damaging	DOID:219 / colon cancer/HML3	-	4463	AB		NM_153446/22895193/['COSMIC']
NonCanon	Q8NHY0	B4GALNT2	17	47243489	968	G	A	323	G	D	probably damaging	DOID:219 / colon cancer/HML3	-	4463	AB		NM_001159387/22895193/['COSMIC']
NonCanon	Q8NHY0	B4GALNT2	17	47243507	986	C	T	329	S	F	probably damaging	DOID:4159 / skin cancer/HML3	-	4463	AB		NM_001159387/-/['ICGC', 'TCGA']
NonCanon	Q8NHY0	B4GALNT2	17	47243507	1166	C	T	389	S	F	probably damaging	DOID:4159 / skin cancer/HML3	-	4463	AB		NM_153446/-/['ICGC', 'TCGA']
NonCanon	Q8NHY0	B4GALNT2	17	47243507	908	C	T	303	S	F	probably damaging	DOID:4159 / skin cancer/HML3	-	4463	AB		NM_001159388/-/['ICGC', 'TCGA']
NonCanon	Q8NHY0	B4GALNT2	17	47243507	908	C	A	303	S	Y	probably damaging	DOID:363 / uterine cancer/HML3	-	4463	AB		NM_001159388/-/['COSMIC', 'TCGA']
NonCanon	Q8NHY0	B4GALNT2	17	47243507	986	C	A	329	S	Y	probably damaging	DOID:363 / uterine cancer/HML3	-	4463	AB		NM_001159387/-/['COSMIC', 'TCGA']
NonCanon	Q8NHY0	B4GALNT2	17	47243507	1166	C	A	389	S	Y	probably damaging	DOID:363 / uterine cancer/HML3	-	4463	AB		NM_153446/-/['COSMIC', 'TCGA']
NonCanon	Q8NHY0	B4GALNT2	17	47243530	1009	C	A	337	L	I	probably damaging	DOID:10534 / stomach cancer/HML3	-	4463	AB		NM_001159387/-/['ICGC', 'TCGA']
NonCanon	Q8NHY0	B4GALNT2	17	47243530	931	C	A	311	L	I	probably damaging	DOID:10534 / stomach cancer/HML3	-	4463	AB		NM_001159388/-/['ICGC', 'TCGA']
NonCanon	Q8NHY0	B4GALNT2	17	47243530	1189	C	A	397	L	I	probably damaging	DOID:10534 / stomach cancer/HML3	-	4463	AB		NM_153446/-/['ICGC', 'TCGA']
NonCanon	Q8NHY0	B4GALNT2	17	47243530	1189	C	T	397	L	F	probably damaging	DOID:11934 / head and neck cancer/HML3	-	4463	AB		NM_153446/-/['TCGA']
NonCanon	Q8NHY0	B4GALNT2	17	47243530	931	C	T	311	L	F	probably damaging	DOID:11934 / head and neck cancer/HML3	-	4463	AB		NM_001159388/-/['TCGA']
NonCanon	Q8NHY0	B4GALNT2	17	47243530	1009	C	T	337	L	F	probably damaging	DOID:11934 / head and neck cancer/HML3	-	4463	AB		NM_001159387/-/['TCGA']
NonCanon	Q8NHY0	B4GALNT2	17	47243530	931	C	T	311	L	F	probably damaging	DOID:0060119 / pharynx cancer/HML3	-	4463	AB		NM_001159388/-/['IntOGen']
NonCanon	Q8NHY0	B4GALNT2	17	47243530	1189	C	T	397	L	F	probably damaging	DOID:0060119 / pharynx cancer/HML3	-	4463	AB		NM_153446/-/['IntOGen']
NonCanon	Q8NHY0	B4GALNT2	17	47243530	1009	C	T	337	L	F	probably damaging	DOID:0060119 / pharynx cancer/HML3	-	4463	AB		NM_001159387/-/['IntOGen']
NonCanon	Q8NHY0	B4GALNT2	17	47243551	1210	C	T	404	L	F	benign	DOID:4159 / skin cancer/HML3	-	4463	AB		NM_153446/-/['TCGA']
NonCanon	Q8NHY0	B4GALNT2	17	47243551	1030	C	T	344	L	F	benign	DOID:4159 / skin cancer/HML3	-	4463	AB		NM_001159387/-/['TCGA']
NonCanon	Q8NHY0	B4GALNT2	17	47243551	952	C	T	318	L	F	benign	DOID:4159 / skin cancer/HML3	-	4463	AB		NM_001159388/-/['TCGA']
NonCanon	Q8NHY0	B4GALNT2	17	47243560	961	G	A	321	E	K	benign	DOID:4159 / skin cancer/HML3	-	4463	AB		NM_001159388/-/['ICGC', 'TCGA']
NonCanon	Q8NHY0	B4GALNT2	17	47243560	1039	G	A	347	E	K	benign	DOID:4159 / skin cancer/HML3	-	4463	AB		NM_001159387/-/['ICGC', 'TCGA']
NonCanon	Q8NHY0	B4GALNT2	17	47243560	1219	G	A	407	E	K	benign	DOID:4159 / skin cancer/HML3	-	4463	AB		NM_153446/-/['ICGC', 'TCGA']
NonCanon	Q8NHY0	B4GALNT2	17	47243577	1236	G	T	412	E	D	probably damaging	DOID:363 / uterine cancer/HML3	-	4463	AB		NM_153446/-/['TCGA']
NonCanon	Q8NHY0	B4GALNT2	17	47243577	978	G	T	326	E	D	probably damaging	DOID:363 / uterine cancer/HML3	-	4463	AB		NM_001159388/-/['TCGA']
NonCanon	Q8NHY0	B4GALNT2	17	47243577	1056	G	T	352	E	D	probably damaging	DOID:363 / uterine cancer/HML3	-	4463	AB		NM_001159387/-/['TCGA']
NonCanon	Q8NHY0	B4GALNT2	17	47243582	1061	T	A	354	L	Q	probably damaging	DOID:1324 / lung cancer/HML3	-	4463	AB		NM_001159387/22980975/['COSMIC']
NonCanon	Q8NHY0	B4GALNT2	17	47243582	1241	T	A	414	L	Q	probably damaging	DOID:1324 / lung cancer/HML3	-	4463	AB		NM_153446/22980975/['COSMIC']
NonCanon	Q8NHY0	B4GALNT2	17	47243582	983	T	A	328	L	Q	probably damaging	DOID:1324 / lung cancer/HML3	-	4463	AB		NM_001159388/22980975/['COSMIC']
NonCanon	Q8NHY0	B4GALNT2	17	47243605	1006	G	A	336	E	K	probably damaging	DOID:4159 / skin cancer/HML3	-	4463	AB		NM_001159388/-/['ICGC', 'TCGA']
NonCanon	Q8NHY0	B4GALNT2	17	47243605	1084	G	A	362	E	K	probably damaging	DOID:4159 / skin cancer/HML3	-	4463	AB		NM_001159387/-/['ICGC', 'TCGA']
NonCanon	Q8NHY0	B4GALNT2	17	47243605	1264	G	A	422	E	K	probably damaging	DOID:4159 / skin cancer/HML3	-	4463	AB		NM_153446/-/['ICGC', 'TCGA']
NonCanon	Q8NHY0	B4GALNT2	17	47243614	1093	G	A	365	V	M	probably damaging	DOID:4362 / cervical cancer/HML3	-	4463	AB		NM_001159387/-/['COSMIC', 'TCGA']
NonCanon	Q8NHY0	B4GALNT2	17	47243614	1273	G	A	425	V	M	probably damaging	DOID:4362 / cervical cancer/HML3	-	4463	AB		NM_153446/-/['COSMIC', 'TCGA']
NonCanon	Q8NHY0	B4GALNT2	17	47243614	1015	G	A	339	V	M	probably damaging	DOID:4362 / cervical cancer/HML3	-	4463	AB		NM_001159388/-/['COSMIC', 'TCGA']
NonCanon	Q8NHY0	B4GALNT2	17	47246074	1307	A	G	436	Q	R	possibly damaging	DOID:2531 / hematologic cancer/HML3	-	4463	AB		NM_153446/23292937/['COSMIC']
NonCanon	Q8NHY0	B4GALNT2	17	47246074	1049	A	G	350	Q	R	possibly damaging	DOID:2531 / hematologic cancer/HML3	-	4463	AB		NM_001159388/23292937/['COSMIC']
NonCanon	Q8NHY0	B4GALNT2	17	47246074	1127	A	G	376	Q	R	possibly damaging	DOID:2531 / hematologic cancer/HML3	-	4463	AB		NM_001159387/23292937/['COSMIC']
NonCanon	Q8NHY0	B4GALNT2	17	47246094	1147	C	T	383	Q	X	-	DOID:263 / kidney cancer/HML3	-	4463	AB		NM_001159387/23797736/['COSMIC']
NonCanon	Q8NHY0	B4GALNT2	17	47246094	1327	C	T	443	Q	X	-	DOID:263 / kidney cancer/HML3	-	4463	AB		NM_153446/23797736/['COSMIC']
NonCanon	Q8NHY0	B4GALNT2	17	47246094	1069	C	T	357	Q	X	-	DOID:263 / kidney cancer/HML3	-	4463	AB		NM_001159388/23797736/['COSMIC']
NonCanon	Q8NHY0	B4GALNT2	17	47246102	1155	G	T	385	E	D	benign	DOID:1993 / rectum cancer/HML3	-	4463	AB		NM_001159387/-/['COSMIC']
NonCanon	Q8NHY0	B4GALNT2	17	47246102	1335	G	T	445	E	D	benign	DOID:1993 / rectum cancer/HML3	-	4463	AB		NM_153446/-/['COSMIC']
NonCanon	Q8NHY0	B4GALNT2	17	47246102	1077	G	T	359	E	D	benign	DOID:1993 / rectum cancer/HML3	-	4463	AB		NM_001159388/-/['COSMIC']
NonCanon	Q8NHY0	B4GALNT2	17	47246130	1105	G	T	369	G	X	-	DOID:219 / colon cancer/HML3	-	4463	AB		NM_001159388/-/['ICGC', 'TCGA', 'COSMIC']
NonCanon	Q8NHY0	B4GALNT2	17	47246130	1363	G	T	455	G	X	-	DOID:219 / colon cancer/HML3	-	4463	AB		NM_153446/-/['ICGC', 'TCGA', 'COSMIC']
NonCanon	Q8NHY0	B4GALNT2	17	47246130	1183	G	T	395	G	X	-	DOID:219 / colon cancer/HML3	-	4463	AB		NM_001159387/-/['ICGC', 'TCGA', 'COSMIC']
NonCanon	Q8NHY0	B4GALNT2	17	47246131	1364	G	A	455	G	E	probably damaging	DOID:4159 / skin cancer/HML3	-	4463	AB		NM_153446/-/['ICGC', 'TCGA']
NonCanon	Q8NHY0	B4GALNT2	17	47246131	1106	G	A	369	G	E	probably damaging	DOID:4159 / skin cancer/HML3	-	4463	AB		NM_001159388/-/['ICGC', 'TCGA']
NonCanon	Q8NHY0	B4GALNT2	17	47246131	1184	G	A	395	G	E	probably damaging	DOID:4159 / skin cancer/HML3	-	4463	AB		NM_001159387/-/['ICGC', 'TCGA']
NonCanon	Q8NHY0	B4GALNT2	17	47246143	1196	C	A	399	P	H	probably damaging	DOID:219 / colon cancer/HML3	-	4463	AB		NM_001159387/-/['IntOGen']
NonCanon	Q8NHY0	B4GALNT2	17	47246143	1376	C	A	459	P	H	probably damaging	DOID:219 / colon cancer/HML3	-	4463	AB		NM_153446/-/['IntOGen']
NonCanon	Q8NHY0	B4GALNT2	17	47246143	1118	C	A	373	P	H	probably damaging	DOID:219 / colon cancer/HML3	-	4463	AB		NM_001159388/-/['IntOGen']
NonCanon	Q8NHY0	B4GALNT2	17	47246143	1118	C	A	373	P	H	probably damaging	DOID:305 / carcinoma/HML3	-	4463	AB		NM_001159388/16959974/['COSMIC']
NonCanon	Q8NHY0	B4GALNT2	17	47246143	1196	C	A	399	P	H	probably damaging	DOID:305 / carcinoma/HML3	-	4463	AB		NM_001159387/16959974/['COSMIC']
NonCanon	Q8NHY0	B4GALNT2	17	47246143	1376	C	A	459	P	H	probably damaging	DOID:305 / carcinoma/HML3	-	4463	AB		NM_153446/16959974/['COSMIC']
NonCanon	Q8NHY0	B4GALNT2	17	47246163	1396	T	C	466	C	R	probably damaging	DOID:8618 / oral cavity cancer/HML3	Gain|Phosphorylation	4463	AB		NM_153446/23619168/['COSMIC']
NonCanon	Q8NHY0	B4GALNT2	17	47246163	1138	T	C	380	C	R	probably damaging	DOID:8618 / oral cavity cancer/HML3	-	4463	AB		NM_001159388/23619168/['COSMIC']
NonCanon	Q8NHY0	B4GALNT2	17	47246163	1216	T	C	406	C	R	probably damaging	DOID:8618 / oral cavity cancer/HML3	-	4463	AB		NM_001159387/23619168/['COSMIC']
NonCanon	Q8NHY0	B4GALNT2	17	47246181	1414	G	A	472	V	M	probably damaging	DOID:2531 / hematologic cancer/HML3	-	4463	AB		NM_153446/24325359/['COSMIC']
NonCanon	Q8NHY0	B4GALNT2	17	47246181	1234	G	A	412	V	M	probably damaging	DOID:2531 / hematologic cancer/HML3	-	4463	AB		NM_001159387/24325359/['COSMIC']
NonCanon	Q8NHY0	B4GALNT2	17	47246181	1156	G	A	386	V	M	probably damaging	DOID:2531 / hematologic cancer/HML3	-	4463	AB		NM_001159388/24325359/['COSMIC']
NonCanon	Q8NHY0	B4GALNT2	17	47246211	1186	C	T	396	R	X	-	DOID:1612 / breast cancer/HML3	-	4463	AB		NM_001159388/-/['COSMIC', 'IntOGen', 'ICGC', 'TCGA']
NonCanon	Q8NHY0	B4GALNT2	17	47246211	1444	C	T	482	R	X	-	DOID:1612 / breast cancer/HML3	-	4463	AB		NM_153446/-/['COSMIC', 'IntOGen', 'ICGC', 'TCGA']
NonCanon	Q8NHY0	B4GALNT2	17	47246211	1264	C	T	422	R	X	-	DOID:1612 / breast cancer/HML3	-	4463	AB		NM_001159387/-/['COSMIC', 'IntOGen', 'ICGC', 'TCGA']
NonCanon	Q8NHY0	B4GALNT2	17	47246221	1454	G	A	485	R	K	benign	DOID:4159 / skin cancer/HML3	-	4463	AB		NM_153446/22842228/['COSMIC']
NonCanon	Q8NHY0	B4GALNT2	17	47246221	1274	G	A	425	R	K	benign	DOID:4159 / skin cancer/HML3	-	4463	AB		NM_001159387/22842228/['COSMIC']
NonCanon	Q8NHY0	B4GALNT2	17	47246221	1196	G	A	399	R	K	benign	DOID:4159 / skin cancer/HML3	-	4463	AB		NM_001159388/22842228/['COSMIC']
NonCanon	Q8NHY0	B4GALNT2	17	47246238	1291	C	A	431	R	S	possibly damaging	DOID:263 / kidney cancer/HML3	-	4463	AB		NM_001159387/-/['TCGA']
NonCanon	Q8NHY0	B4GALNT2	17	47246238	1471	C	A	491	R	S	possibly damaging	DOID:263 / kidney cancer/HML3	-	4463	AB		NM_153446/-/['TCGA']
NonCanon	Q8NHY0	B4GALNT2	17	47246238	1213	C	A	405	R	S	possibly damaging	DOID:263 / kidney cancer/HML3	-	4463	AB		NM_001159388/-/['TCGA']
NonCanon	Q8NHY0	B4GALNT2	17	47246244	1297	C	T	433	Q	X	-	DOID:2394 / ovarian cancer/HML3	-	4463	AB		NM_001159387/-/['COSMIC']
NonCanon	Q8NHY0	B4GALNT2	17	47246244	1219	C	T	407	Q	X	-	DOID:2394 / ovarian cancer/HML3	-	4463	AB		NM_001159388/-/['COSMIC']
NonCanon	Q8NHY0	B4GALNT2	17	47246244	1477	C	T	493	Q	X	-	DOID:2394 / ovarian cancer/HML3	-	4463	AB		NM_153446/-/['COSMIC']
NonCanon	Q8NHY0	B4GALNT2	17	47246247	1480	C	T	494	R	X	-	DOID:3070 / malignant glioma/HML3	-	4463	AB		NM_153446/-/['TCGA']
NonCanon	Q8NHY0	B4GALNT2	17	47246247	1222	C	T	408	R	X	-	DOID:3070 / malignant glioma/HML3	-	4463	AB		NM_001159388/-/['TCGA']
NonCanon	Q8NHY0	B4GALNT2	17	47246247	1300	C	T	434	R	X	-	DOID:3070 / malignant glioma/HML3	-	4463	AB		NM_001159387/-/['TCGA']
NonCanon	Q8NHY0	B4GALNT2	17	47246247	1300	C	T	434	R	X	-	DOID:1319 / brain cancer/HML3	-	4463	AB		NM_001159387/23917401/['COSMIC']
NonCanon	Q8NHY0	B4GALNT2	17	47246247	1222	C	T	408	R	X	-	DOID:1319 / brain cancer/HML3	-	4463	AB		NM_001159388/23917401/['COSMIC']
NonCanon	Q8NHY0	B4GALNT2	17	47246247	1480	C	T	494	R	X	-	DOID:1319 / brain cancer/HML3	-	4463	AB		NM_153446/23917401/['COSMIC']
NonCanon	Q8NHY0	B4GALNT2	17	47246248	1223	G	A	408	R	Q	probably damaging	DOID:219 / colon cancer/HML3	-	4463	AB		NM_001159388/22895193/['COSMIC']
NonCanon	Q8NHY0	B4GALNT2	17	47246248	1301	G	A	434	R	Q	probably damaging	DOID:219 / colon cancer/HML3	-	4463	AB		NM_001159387/22895193/['COSMIC']
NonCanon	Q8NHY0	B4GALNT2	17	47246248	1481	G	A	494	R	Q	probably damaging	DOID:219 / colon cancer/HML3	-	4463	AB		NM_153446/22895193/['COSMIC']
NonCanon	Q8NHY0	B4GALNT2	17	47246256	1309	C	T	437	H	Y	probably damaging	DOID:4159 / skin cancer/HML3	-	4463	AB		NM_001159387/-/['ICGC', 'TCGA']
NonCanon	Q8NHY0	B4GALNT2	17	47246256	1231	C	T	411	H	Y	probably damaging	DOID:4159 / skin cancer/HML3	-	4463	AB		NM_001159388/-/['ICGC', 'TCGA']
NonCanon	Q8NHY0	B4GALNT2	17	47246256	1489	C	T	497	H	Y	probably damaging	DOID:4159 / skin cancer/HML3	-	4463	AB		NM_153446/-/['ICGC', 'TCGA']
NonCanon	Q8NHY0	B4GALNT2	17	47246260	1493	C	T	498	S	L	benign	DOID:4159 / skin cancer/HML3	-	4463	AB		NM_153446/-/['ICGC', 'TCGA']
NonCanon	Q8NHY0	B4GALNT2	17	47246260	1235	C	T	412	S	L	benign	DOID:4159 / skin cancer/HML3	-	4463	AB		NM_001159388/-/['ICGC', 'TCGA']
NonCanon	Q8NHY0	B4GALNT2	17	47246260	1313	C	T	438	S	L	benign	DOID:4159 / skin cancer/HML3	-	4463	AB		NM_001159387/-/['ICGC', 'TCGA']
NonCanon	Q8NHY0	B4GALNT2	17	47246889	1500	C	A	500	F	L	probably damaging	DOID:219 / colon cancer/HML3	-	4463	AB		NM_153446/22810696/['COSMIC']
NonCanon	Q8NHY0	B4GALNT2	17	47246889	1242	C	A	414	F	L	probably damaging	DOID:219 / colon cancer/HML3	-	4463	AB		NM_001159388/22810696/['COSMIC']
NonCanon	Q8NHY0	B4GALNT2	17	47246889	1320	C	A	440	F	L	probably damaging	DOID:219 / colon cancer/HML3	-	4463	AB		NM_001159387/22810696/['COSMIC']
NonCanon	Q8NHY0	B4GALNT2	17	47246917	1348	G	A	450	V	M	probably damaging	DOID:2394 / ovarian cancer/HML3	-	4463	AB		NM_001159387/23856246/['COSMIC']
NonCanon	Q8NHY0	B4GALNT2	17	47246917	1270	G	A	424	V	M	probably damaging	DOID:2394 / ovarian cancer/HML3	-	4463	AB		NM_001159388/23856246/['COSMIC']
NonCanon	Q8NHY0	B4GALNT2	17	47246917	1528	G	A	510	V	M	probably damaging	DOID:2394 / ovarian cancer/HML3	-	4463	AB		NM_153446/23856246/['COSMIC']
NonCanon	Q8NHY0	B4GALNT2	17	47246920	1531	G	T	511	G	W	probably damaging	DOID:3571 / liver cancer/HML3	-	4463	AB		NM_153446/-/['TCGA']
NonCanon	Q8NHY0	B4GALNT2	17	47246920	1273	G	T	425	G	W	probably damaging	DOID:3571 / liver cancer/HML3	-	4463	AB		NM_001159388/-/['TCGA']
NonCanon	Q8NHY0	B4GALNT2	17	47246920	1351	G	T	451	G	W	probably damaging	DOID:3571 / liver cancer/HML3	-	4463	AB		NM_001159387/-/['TCGA']
NonCanon	Q8NHY0	B4GALNT2	17	47246924	1535	C	G	512	S	X	-	DOID:1612 / breast cancer/HML3	-	4463	AB		NM_153446/-/['COSMIC', 'ICGC', 'TCGA']
NonCanon	Q8NHY0	B4GALNT2	17	47246924	1355	C	G	452	S	X	-	DOID:1612 / breast cancer/HML3	-	4463	AB		NM_001159387/-/['COSMIC', 'ICGC', 'TCGA']
NonCanon	Q8NHY0	B4GALNT2	17	47246924	1277	C	G	426	S	X	-	DOID:1612 / breast cancer/HML3	-	4463	AB		NM_001159388/-/['COSMIC', 'ICGC', 'TCGA']
NonCanon	Q8NHY0	B4GALNT2	17	47246960	1391	C	A	464	S	Y	possibly damaging	DOID:219 / colon cancer/HML3	-	4463	AB		NM_001159387/-/['ICGC', 'TCGA']
NonCanon	Q8NHY0	B4GALNT2	17	47246960	1313	C	A	438	S	Y	possibly damaging	DOID:219 / colon cancer/HML3	-	4463	AB		NM_001159388/-/['ICGC', 'TCGA']
NonCanon	Q8NHY0	B4GALNT2	17	47246960	1571	C	A	524	S	Y	possibly damaging	DOID:219 / colon cancer/HML3	-	4463	AB		NM_153446/-/['ICGC', 'TCGA']
NonCanon	Q8NHY0	B4GALNT2	17	47246960	1313	C	A	438	S	Y	possibly damaging	DOID:1521 / cecum cancer/HML3	-	4463	AB		NM_001159388/-/['COSMIC']
NonCanon	Q8NHY0	B4GALNT2	17	47246960	1391	C	A	464	S	Y	possibly damaging	DOID:1521 / cecum cancer/HML3	-	4463	AB		NM_001159387/-/['COSMIC']
NonCanon	Q8NHY0	B4GALNT2	17	47246960	1571	C	A	524	S	Y	possibly damaging	DOID:1521 / cecum cancer/HML3	-	4463	AB		NM_153446/-/['COSMIC']
NonCanon	Q8NHY0	B4GALNT2	17	47246987	1340	C	A	447	A	D	possibly damaging	DOID:2394 / ovarian cancer/HML3	-	4463	AB		NM_001159388/-/['IntOGen', 'ICGC']	NM_001159388/21720365/['COSMIC']
NonCanon	Q8NHY0	B4GALNT2	17	47246987	1418	C	A	473	A	D	possibly damaging	DOID:2394 / ovarian cancer/HML3	-	4463	AB		NM_001159387/-/['IntOGen', 'ICGC']	NM_001159387/21720365/['COSMIC']
NonCanon	Q8NHY0	B4GALNT2	17	47246987	1598	C	A	533	A	D	possibly damaging	DOID:2394 / ovarian cancer/HML3	-	4463	AB		NM_153446/-/['IntOGen', 'ICGC']	NM_153446/21720365/['COSMIC']
NonCanon	Q8NHY0	B4GALNT2	17	47246996	1427	A	G	476	K	R	benign	DOID:4159 / skin cancer/HML3	-	4463	AB		NM_001159387/-/['ICGC', 'TCGA']
NonCanon	Q8NHY0	B4GALNT2	17	47246996	1607	A	G	536	K	R	benign	DOID:4159 / skin cancer/HML3	-	4463	AB		NM_153446/-/['ICGC', 'TCGA']
NonCanon	Q8NHY0	B4GALNT2	17	47246996	1349	A	G	450	K	R	benign	DOID:4159 / skin cancer/HML3	-	4463	AB		NM_001159388/-/['ICGC', 'TCGA']
NonCanon	Q8NHY0	B4GALNT2	17	47246998	1351	A	T	451	T	S	benign	DOID:2394 / ovarian cancer/HML3	-	4463	AB		NM_001159388/-/['COSMIC']
NonCanon	Q8NHY0	B4GALNT2	17	47246998	1429	A	T	477	T	S	benign	DOID:2394 / ovarian cancer/HML3	-	4463	AB		NM_001159387/-/['COSMIC']
NonCanon	Q8NHY0	B4GALNT2	17	47246998	1609	A	T	537	T	S	benign	DOID:2394 / ovarian cancer/HML3	-	4463	AB		NM_153446/-/['COSMIC']
NonCanon	Q8NHY0	B4GALNT2	17	47247014	1367	G	A	456	R	Q	probably damaging	DOID:2531 / hematologic cancer/HML3	-	4463	AB		NM_001159388/23292937/['COSMIC']
NonCanon	Q8NHY0	B4GALNT2	17	47247014	1445	G	A	482	R	Q	probably damaging	DOID:2531 / hematologic cancer/HML3	-	4463	AB		NM_001159387/23292937/['COSMIC']
NonCanon	Q8NHY0	B4GALNT2	17	47247014	1625	G	A	542	R	Q	probably damaging	DOID:2531 / hematologic cancer/HML3	Gain|Phosphorylation	4463	AB		NM_153446/23292937/['COSMIC']
NonCanon	Q8NHY0	B4GALNT2	17	47247032	1643	G	A	548	R	Q	benign	DOID:219 / colon cancer/HML3	-	4463	AB		NM_153446/-/['ICGC', 'TCGA']
NonCanon	Q8NHY0	B4GALNT2	17	47247032	1385	G	A	462	R	Q	benign	DOID:219 / colon cancer/HML3	-	4463	AB		NM_001159388/-/['ICGC', 'TCGA']
NonCanon	Q8NHY0	B4GALNT2	17	47247032	1463	G	A	488	R	Q	benign	DOID:219 / colon cancer/HML3	-	4463	AB		NM_001159387/-/['ICGC', 'TCGA']
NonCanon	Q8NHY0	B4GALNT2	17	47247032	1463	G	A	488	R	Q	benign	DOID:1521 / cecum cancer/HML3	-	4463	AB		NM_001159387/-/['COSMIC']
NonCanon	Q8NHY0	B4GALNT2	17	47247032	1643	G	A	548	R	Q	benign	DOID:1521 / cecum cancer/HML3	-	4463	AB		NM_153446/-/['COSMIC']
NonCanon	Q8NHY0	B4GALNT2	17	47247032	1385	G	A	462	R	Q	benign	DOID:1521 / cecum cancer/HML3	-	4463	AB		NM_001159388/-/['COSMIC']
NonCanon	Q8NHY0	B4GALNT2	17	47247044	1397	A	G	466	K	R	probably damaging	DOID:1612 / breast cancer/HML3	-	4463	AB		NM_001159388/-/['COSMIC', 'ICGC', 'TCGA']
NonCanon	Q8NHY0	B4GALNT2	17	47247044	1475	A	G	492	K	R	probably damaging	DOID:1612 / breast cancer/HML3	-	4463	AB		NM_001159387/-/['COSMIC', 'ICGC', 'TCGA']
NonCanon	Q8NHY0	B4GALNT2	17	47247044	1655	A	G	552	K	R	probably damaging	DOID:1612 / breast cancer/HML3	-	4463	AB		NM_153446/-/['COSMIC', 'ICGC', 'TCGA']
NonCanon	Q8NHY0	B4GALNT2	17	47247070	1501	C	T	501	H	Y	benign	DOID:4159 / skin cancer/HML3	-	4463	AB		NM_001159387/-/['ICGC', 'TCGA']
NonCanon	Q8NHY0	B4GALNT2	17	47247070	1681	C	T	561	H	Y	benign	DOID:4159 / skin cancer/HML3	-	4463	AB		NM_153446/-/['ICGC', 'TCGA']
NonCanon	Q8NHY0	B4GALNT2	17	47247070	1423	C	T	475	H	Y	benign	DOID:4159 / skin cancer/HML3	-	4463	AB		NM_001159388/-/['ICGC', 'TCGA']
NonCanon	Q8NHY0	B4GALNT2	17	47247083	1514	C	T	505	A	V	benign	DOID:1781 / thyroid cancer/HML3	-	4463	AB		NM_001159387/-/['ICGC', 'TCGA']
NonCanon	Q8NHY0	B4GALNT2	17	47247083	1694	C	T	565	A	V	benign	DOID:1781 / thyroid cancer/HML3	-	4463	AB		NM_153446/-/['ICGC', 'TCGA']
NonCanon	Q8NHY0	B4GALNT2	17	47247083	1436	C	T	479	A	V	benign	DOID:1781 / thyroid cancer/HML3	-	4463	AB		NM_001159388/-/['ICGC', 'TCGA']
NonCanon	Q8NHY0	B4GALNT2	17	47247085	1696	G	A	566	A	T	benign	DOID:2531 / hematologic cancer/HML3	-	4463	AB		NM_153446/23292937/['COSMIC']
NonCanon	Q8NHY0	B4GALNT2	17	47247085	1696	G	A	566	A	T	benign	DOID:10534 / stomach cancer/HML3	-	4463	AB		NM_153446/-/['ICGC', 'TCGA']
NonCanon	Q8NHY0	B4GALNT2	17	47247085	1696	G	A	566	A	T	benign	DOID:1793 / pancreatic cancer/HML3	-	4463	AB		NM_153446/-/['TCGA']
NonCanon	Q6UXZ3	CD300LD	17	72584677	352	G	A	118	V	I	benign	DOID:4159 / skin cancer/HML6	-	4481	AB		NM_001115152/-/['ICGC', 'TCGA']
NonCanon	Q6UXZ3	CD300LD	17	72584683	346	C	A	116	L	I	benign	DOID:363 / uterine cancer/HML6	-	4481	AB		NM_001115152/-/['COSMIC', 'TCGA']
NonCanon	Q6UXZ3	CD300LD	17	72584691	338	G	A	113	G	E	probably damaging	DOID:363 / uterine cancer/HML6	-	4481	AB		NM_001115152/-/['COSMIC', 'TCGA']
NonCanon	Q6UXZ3	CD300LD	17	72584728	301	G	T	101	D	Y	probably damaging	DOID:11054 / urinary bladder cancer/HML6	Gain|Phosphorylation	4481	AB		NM_001115152/-/['COSMIC', 'ICGC', 'TCGA']
NonCanon	Q6UXZ3	CD300LD	17	72584759	270	C	A	90	F	L	probably damaging	DOID:1793 / pancreatic cancer/HML6	Gain|Phosphorylation	4481	AB		NM_001115152/-/['TCGA']
NonCanon	Q6UXZ3	CD300LD	17	72584764	265	G	A	89	V	M	benign	DOID:10534 / stomach cancer/HML6	Gain|Phosphorylation	4481	AB		NM_001115152/-/['COSMIC']
NonCanon	Q6UXZ3	CD300LD	17	72584764	265	G	A	89	V	M	benign	DOID:219 / colon cancer/HML6	Gain|Phosphorylation	4481	AB		NM_001115152/-/['COSMIC', 'ICGC', 'TCGA']
NonCanon	Q6UXZ3	CD300LD	17	72584764	265	G	A	89	V	M	benign	DOID:2531 / hematologic cancer/HML6	Gain|Phosphorylation	4481	AB		NM_001115152/-/['ICGC']
NonCanon	Q6UXZ3	CD300LD	17	72584764	265	G	A	89	V	M	benign	DOID:10283 / prostate cancer/HML6	Gain|Phosphorylation	4481	AB		NM_001115152/-/['ICGC']
NonCanon	Q6UXZ3	CD300LD	17	72584797	232	C	T	78	R	X	-	DOID:4159 / skin cancer/HML6	-	4481	AB		NM_001115152/-/['ICGC', 'TCGA']
NonCanon	Q6UXZ3	CD300LD	17	72584875	154	C	T	52	R	W	benign	DOID:1793 / pancreatic cancer/HML6	-	4481	AB		NM_001115152/-/['TCGA']
NonCanon	Q6UXZ3	CD300LD	17	72584893	136	G	C	46	E	Q	possibly damaging	DOID:1612 / breast cancer/HML6	Gain|Phosphorylation	4481	AB		NM_001115152/-/['COSMIC', 'ICGC', 'TCGA']
NonCanon	Q6UXZ3	CD300LD	17	72584905	124	G	T	42	G	C	probably damaging	DOID:1324 / lung cancer/HML6	Gain|Phosphorylation	4481	AB		NM_001115152/22980975/['COSMIC']
NonCanon	Q6UXZ3	CD300LD	17	72584938	91	G	A	31	E	K	possibly damaging	DOID:4159 / skin cancer/HML6	-	4481	AB		NM_001115152/-/['TCGA']
NonCanon	Q6UXZ3	CD300LD	17	72584940	89	C	T	30	S	L	benign	DOID:263 / kidney cancer/HML6	Gain|Phosphorylation	4481	AB		NM_001115152/-/['TCGA', 'COSMIC']
NonCanon	Q6UXZ3	CD300LD	17	72584974	55	G	A	19	A	T	benign	DOID:363 / uterine cancer/HML6	-	4481	AB		NM_001115152/-/['COSMIC', 'TCGA']
NonCanon	Q96MU5	C17orf77	17	72588188	3	G	T	1	M	I	benign	DOID:1612 / breast cancer/HML6	-	4481	AB		NM_152460/-/['COSMIC', 'IntOGen', 'ICGC', 'TCGA']
NonCanon	Q96MU5	C17orf77	17	72588189	4	G	A	2	D	N	benign	DOID:4159 / skin cancer/HML6	-	4481	AB		NM_152460/22842228/['COSMIC']
NonCanon	Q96MU5	C17orf77	17	72588190	5	A	T	2	D	V	possibly damaging	DOID:1319 / brain cancer/HML6	-	4481	AB		NM_152460/-/['ICGC', 'TCGA']
NonCanon	Q96MU5	C17orf77	17	72588192	7	G	A	3	E	K	probably damaging	DOID:0060119 / pharynx cancer/HML6	Gain|Phosphorylation	4481	AB		NM_152460/-/['IntOGen']
NonCanon	Q96MU5	C17orf77	17	72588192	7	G	A	3	E	K	probably damaging	DOID:11934 / head and neck cancer/HML6	Gain|Phosphorylation	4481	AB		NM_152460/-/['TCGA']
NonCanon	Q96MU5	C17orf77	17	72588199	14	C	T	5	A	V	possibly damaging	DOID:1612 / breast cancer/HML6	-	4481	AB		NM_152460/-/['COSMIC', 'IntOGen']
NonCanon	Q96MU5	C17orf77	17	72588204	19	T	C	7	S	P	benign	DOID:1793 / pancreatic cancer/HML6	-	4481	AB		NM_152460/-/['TCGA']
NonCanon	Q96MU5	C17orf77	17	72588211	26	C	T	9	S	F	probably damaging	DOID:4159 / skin cancer/HML6	-	4481	AB		NM_152460/-/['ICGC', 'TCGA']
NonCanon	Q96MU5	C17orf77	17	72588217	32	C	T	11	T	I	possibly damaging	DOID:2531 / hematologic cancer/HML6	Gain|Phosphorylation	4481	AB		NM_152460/-/['ICGC']
NonCanon	Q96MU5	C17orf77	17	72588229	44	C	T	15	P	L	possibly damaging	DOID:4159 / skin cancer/HML6	Gain|Phosphorylation	4481	AB		NM_152460/-/['ICGC', 'TCGA']
NonCanon	Q96MU5	C17orf77	17	72588235	50	A	G	17	N	S	benign	DOID:3571 / liver cancer/HML6	-	4481	AB		NM_152460/-/['TCGA']
NonCanon	Q96MU5	C17orf77	17	72588253	68	C	A	23	P	Q	probably damaging	DOID:5041 / esophageal cancer/HML6	-	4481	AB		NM_152460/23525077/['COSMIC']
NonCanon	Q96MU5	C17orf77	17	72588276	91	T	C	31	C	R	benign	DOID:10534 / stomach cancer/HML6	Gain|Phosphorylation	4481	AB		NM_152460/-/['ICGC', 'TCGA']
NonCanon	Q96MU5	C17orf77	17	72588355	170	C	T	57	S	F	probably damaging	DOID:4159 / skin cancer/HML6	-	4481	AB		NM_152460/-/['TCGA']
NonCanon	Q96MU5	C17orf77	17	72588405	220	C	T	74	P	S	possibly damaging	DOID:1909 / melanoma/HML6	-	4481	AB		NM_152460/24265154/['COSMIC']
NonCanon	Q96MU5	C17orf77	17	72588490	305	C	T	102	S	F	probably damaging	DOID:4159 / skin cancer/HML6	-	4481	AB		NM_152460/-/['TCGA']
NonCanon	Q96MU5	C17orf77	17	72588501	316	T	G	106	L	V	benign	DOID:2394 / ovarian cancer/HML6	Gain|Phosphorylation	4481	AB		NM_152460/23856246/['COSMIC']
NonCanon	Q96MU5	C17orf77	17	72588504	319	G	A	107	G	R	probably damaging	DOID:4159 / skin cancer/HML6	-	4481	AB		NM_152460/22842228/['COSMIC']
NonCanon	Q96MU5	C17orf77	17	72588505	320	G	A	107	G	E	possibly damaging	DOID:4159 / skin cancer/HML6	-	4481	AB		NM_152460/22842228/['COSMIC']
NonCanon	Q96MU5	C17orf77	17	72588510	325	A	T	109	K	X	-	DOID:4159 / skin cancer/HML6	-	4481	AB		NM_152460/-/['ICGC', 'TCGA']
NonCanon	Q96MU5	C17orf77	17	72588523	338	C	A	113	S	Y	probably damaging	DOID:1612 / breast cancer/HML6	-	4481	AB		NM_152460/-/['ICGC', 'COSMIC', 'TCGA']
NonCanon	Q96MU5	C17orf77	17	72588529	344	A	T	115	K	I	benign	DOID:4159 / skin cancer/HML6	-	4481	AB		NM_152460/-/['ICGC', 'TCGA']
NonCanon	Q96MU5	C17orf77	17	72588539	354	G	T	118	R	S	benign	DOID:1324 / lung cancer/HML6	-	4481	AB		NM_152460/22941189/['COSMIC']	NM_152460/-/['IntOGen']
NonCanon	Q96MU5	C17orf77	17	72588562	377	G	T	126	C	F	probably damaging	DOID:263 / kidney cancer/HML6	-	4481	AB		NM_152460/-/['ICGC', 'TCGA']
NonCanon	Q96MU5	C17orf77	17	72588570	385	T	G	129	F	V	benign	DOID:10534 / stomach cancer/HML6	-	4481	AB		NM_152460/-/['ICGC', 'TCGA']
NonCanon	Q96MU5	C17orf77	17	72588583	398	G	A	133	G	E	benign	DOID:4159 / skin cancer/HML6	-	4481	AB		NM_152460/22842228/['COSMIC']
NonCanon	Q96MU5	C17orf77	17	72588588	403	G	A	135	E	K	benign	DOID:219 / colon cancer/HML6	Gain|Phosphorylation	4481	AB		NM_152460/-/['COSMIC', 'ICGC', 'TCGA']
NonCanon	Q96MU5	C17orf77	17	72588588	403	G	T	135	E	X	-	DOID:219 / colon cancer/HML6	-	4481	AB		NM_152460/-/['COSMIC', 'ICGC', 'TCGA']
NonCanon	Q96MU5	C17orf77	17	72588601	416	G	A	139	G	E	benign	DOID:0060119 / pharynx cancer/HML6	-	4481	AB		NM_152460/-/['IntOGen']
NonCanon	Q96MU5	C17orf77	17	72588653	468	G	T	156	E	D	benign	DOID:1324 / lung cancer/HML6	-	4481	AB		NM_152460/-/['IntOGen']
NonCanon	Q96MU5	C17orf77	17	72588657	472	G	A	158	G	R	probably damaging	DOID:4159 / skin cancer/HML6	-	4481	AB		NM_152460/-/['ICGC', 'TCGA']	NM_152460/22842228/['COSMIC']
NonCanon	Q96MU5	C17orf77	17	72588661	476	G	A	159	G	E	probably damaging	DOID:1612 / breast cancer/HML6	Gain|Phosphorylation	4481	AB		NM_152460/-/['COSMIC', 'IntOGen', 'ICGC', 'TCGA']
NonCanon	Q96MU5	C17orf77	17	72588676	491	G	A	164	R	K	benign	DOID:1909 / melanoma/HML6	-	4481	AB		NM_152460/-/['ClinVar']
NonCanon	Q96MU5	C17orf77	17	72588678	493	A	T	165	S	C	probably damaging	DOID:4159 / skin cancer/HML6	-	4481	AB		NM_152460/-/['TCGA']
NonCanon	Q96MU5	C17orf77	17	72588697	512	T	C	171	L	P	benign	DOID:1324 / lung cancer/HML6	Gain|Phosphorylation	4481	AB		NM_152460/-/['IntOGen']	NM_152460/22941189/['COSMIC']
NonCanon	Q96MU5	C17orf77	17	72588704	519	G	C	173	E	D	benign	DOID:0060119 / pharynx cancer/HML6	-	4481	AB		NM_152460/-/['IntOGen']
NonCanon	Q96MU5	C17orf77	17	72588709	524	C	T	175	T	M	probably damaging	DOID:10534 / stomach cancer/HML6	Gain|Phosphorylation	4481	AB		NM_152460/-/['ICGC', 'TCGA']
NonCanon	Q96MU5	C17orf77	17	72588734	549	C	A	183	C	X	-	DOID:1324 / lung cancer/HML6	-	4481	AB		NM_152460/-/['COSMIC']
NonCanon	Q96MU5	C17orf77	17	72588775	590	T	C	197	L	P	probably damaging	DOID:3571 / liver cancer/HML6	Gain|Phosphorylation	4481	AB		NM_152460/-/['TCGA']
NonCanon	Q96MU5	C17orf77	17	72588778	593	C	T	198	T	I	benign	DOID:10534 / stomach cancer/HML6	Gain|Phosphorylation	4481	AB		NM_152460/-/['COSMIC']
NonCanon	Q96MU5	C17orf77	17	72588778	593	C	T	198	T	I	benign	DOID:219 / colon cancer/HML6	Gain|Phosphorylation	4481	AB		NM_152460/-/['COSMIC', 'ICGC', 'TCGA']
NonCanon	Q96MU5	C17orf77	17	72588778	593	C	T	198	T	I	benign	DOID:2531 / hematologic cancer/HML6	Gain|Phosphorylation	4481	AB		NM_152460/-/['ICGC']
NonCanon	Q96MU5	C17orf77	17	72588778	593	C	T	198	T	I	benign	DOID:1781 / thyroid cancer/HML6	Gain|Phosphorylation	4481	AB		NM_152460/-/['ICGC', 'COSMIC']
NonCanon	Q96MU5	C17orf77	17	72588806	621	C	A	207	C	X	-	DOID:3571 / liver cancer/HML6	-	4481	AB		NM_152460/-/['TCGA']
NonCanon	Q96MU5	C17orf77	17	72588880	695	T	C	232	L	P	benign	DOID:3571 / liver cancer/HML6	-	4481	AB		NM_152460/-/['ICGC', 'COSMIC']
NonCanon	Q96MU5	C17orf77	17	72588888	703	C	T	235	P	S	probably damaging	DOID:4159 / skin cancer/HML6	Gain|Phosphorylation	4481	AB		NM_152460/-/['TCGA']
NonCanon	Q96MU5	C17orf77	17	72588903	718	C	T	240	P	S	probably damaging	DOID:4159 / skin cancer/HML6	Gain|Phosphorylation	4481	AB		NM_152460/-/['TCGA']
NonCanon	Q8N122	RPTOR	17	78519444	15	G	A	5	M	I	benign	DOID:1612 / breast cancer/HML2	-	4490	AB		NM_001163034/22722201/['COSMIC']	NM_001163034/-/['IntOGen', 'ICGC']	NM_020761/-/['IntOGen', 'ICGC']	NM_020761/22722201/['COSMIC']
NonCanon	Q8N122	RPTOR	17	78519560	131	C	G	44	S	C	probably damaging	DOID:11054 / urinary bladder cancer/HML2	-	4490	AB		NM_020761/-/['COSMIC', 'ICGC', 'TCGA']	NM_001163034/-/['COSMIC', 'ICGC', 'TCGA']
NonCanon	Q8N122	RPTOR	17	78519578	149	G	A	50	R	K	probably damaging	DOID:2394 / ovarian cancer/HML2	Gain|Phosphorylation	4490	AB		NM_020761/20668451/['COSMIC']	NM_001163034/20668451/['COSMIC']
NonCanon	Q99578	RIT2	18	40323463	649	A	G	217	T	A	benign	DOID:219 / colon cancer/HERVH	Gain|Phosphorylation	4547	GE	HERVHF	NM_002930/-/['IntOGen', 'COSMIC']
NonCanon	Q99578	RIT2	18	40323474	638	G	A	213	R	K	benign	DOID:4159 / skin cancer/HERVH	-	4547	GE	HERVHF	NM_002930/-/['ICGC', 'TCGA']
NonCanon	Q99578	RIT2	18	40323480	632	A	C	211	K	T	possibly damaging	DOID:1324 / lung cancer/HERVH	-	4547	GE	HERVHF	NM_002930/-/['COSMIC', 'IntOGen']
NonCanon	Q99578	RIT2	18	40323490	622	T	A	208	S	T	possibly damaging	DOID:263 / kidney cancer/HERVH	Gain|Phosphorylation	4547	GE	HERVHF	NM_002930/-/['COSMIC']
NonCanon	Q99578	RIT2	18	40323490	622	T	A	208	S	T	possibly damaging	DOID:1993 / rectum cancer/HERVH	Gain|Phosphorylation	4547	GE	HERVHF	NM_002930/-/['ICGC']
NonCanon	Q99578	RIT2	18	40323501	611	A	C	204	K	T	probably damaging	DOID:10534 / stomach cancer/HERVH	Gain|Phosphorylation	4547	GE	HERVHF	NM_002930/22484628/['COSMIC']
NonCanon	Q99578	RIT2	18	40323518	594	A	C	198	K	N	benign	DOID:10534 / stomach cancer/HERVH	Gain|Glycosylation	4547	GE	HERVHF	NM_002930/-/['ICGC', 'TCGA']
NonCanon	Q99578	RIT2	18	40323522	590	G	A	197	R	K	benign	DOID:1612 / breast cancer/HERVH	Gain|Phosphorylation	4547	GE	HERVHF	NM_002930/-/['COSMIC', 'ICGC', 'TCGA']
NonCanon	Q99578	RIT2	18	40323522	590	G	C	197	R	T	benign	DOID:11054 / urinary bladder cancer/HERVH	Gain|Phosphorylation	4547	GE	HERVHF	NM_002930/-/['IntOGen', 'COSMIC', 'ICGC', 'TCGA']
NonCanon	Q99578	RIT2	18	40323528	584	T	G	195	L	R	possibly damaging	DOID:10534 / stomach cancer/HERVH	-	4547	GE	HERVHF	NM_002930/-/['ICGC', 'TCGA']
NonCanon	Q99578	RIT2	18	40323550	562	C	T	188	P	S	benign	DOID:4159 / skin cancer/HERVH	Gain|Phosphorylation	4547	GE	HERVHF	NM_002930/24838835/['COSMIC']
NonCanon	Q99578	RIT2	18	40323567	545	G	T	182	R	L	probably damaging	DOID:2394 / ovarian cancer/HERVH	-	4547	GE	HERVHF	NM_002930/23856246/['COSMIC']
NonCanon	Q99578	RIT2	18	40323567	545	G	A	182	R	H	probably damaging	DOID:2531 / hematologic cancer/HERVH	-	4547	GE	HERVHF	NM_002930/23856246/['COSMIC']
NonCanon	Q99578	RIT2	18	40323568	544	C	T	182	R	C	probably damaging	DOID:363 / uterine cancer/HERVH	Gain|Phosphorylation	4547	GE	HERVHF	NM_002930/-/['COSMIC', 'TCGA']
NonCanon	Q99578	RIT2	18	40323568	544	C	T	182	R	C	probably damaging	DOID:219 / colon cancer/HERVH	Gain|Phosphorylation	4547	GE	HERVHF	NM_002930/23856246/['COSMIC']
NonCanon	Q99578	RIT2	18	40323568	544	C	T	182	R	C	probably damaging	DOID:10534 / stomach cancer/HERVH	Gain|Phosphorylation	4547	GE	HERVHF	NM_002930/-/['ICGC', 'TCGA']
NonCanon	Q99578	RIT2	18	40323574	538	G	A	180	E	K	probably damaging	DOID:4159 / skin cancer/HERVH	-	4547	GE	HERVHF	NM_002930/22622578/['COSMIC']	NM_002930/-/['ICGC', 'TCGA']
NonCanon	Q99578	RIT2	18	40323576	536	G	A	179	R	K	probably damaging	DOID:1324 / lung cancer/HERVH	-	4547	GE	HERVHF	NM_002930/-/['COSMIC', 'IntOGen', 'ICGC', 'TCGA']
NonCanon	Q99578	RIT2	18	40323592	520	T	A	174	F	I	probably damaging	DOID:11054 / urinary bladder cancer/HERVH	-	4547	GE	HERVHF	NM_002930/-/['IntOGen', 'COSMIC', 'ICGC', 'TCGA']
NonCanon	Q99578	RIT2	18	40323598	514	G	T	172	D	Y	probably damaging	DOID:1324 / lung cancer/HERVH	Gain|Phosphorylation	4547	GE	HERVHF	NM_002930/-/['COSMIC', 'IntOGen', 'ICGC', 'TCGA']
NonCanon	Q99578	RIT2	18	40323616	496	C	A	166	L	I	benign	DOID:1324 / lung cancer/HERVH	-	4547	GE	HERVHF	NM_002930/22980975/['COSMIC']
NonCanon	Q99578	RIT2	18	40323639	473	G	T	158	G	V	benign	DOID:1993 / rectum cancer/HERVH	Gain|Phosphorylation	4547	GE	HERVHF	NM_002930/-/['ICGC', 'TCGA', 'COSMIC']
NonCanon	Q99578	RIT2	18	40323652	460	G	A	154	E	K	benign	DOID:4159 / skin cancer/HERVH	-	4547	GE	HERVHF	NM_002930/-/['ICGC', 'TCGA']
NonCanon	Q99578	RIT2	18	40323652	460	G	A	154	E	K	benign	DOID:219 / colon cancer/HERVH	-	4547	GE	HERVHF	NM_002930/-/['COSMIC', 'ICGC', 'TCGA']
NonCanon	Q99578	RIT2	18	40323655	457	C	A	153	Q	K	benign	DOID:1324 / lung cancer/HERVH	Gain|Phosphorylation	4547	GE	HERVHF	NM_002930/-/['COSMIC', 'IntOGen']
NonCanon	Q99578	RIT2	18	40323667	445	T	A	149	L	M	benign	DOID:3571 / liver cancer/HERVH	Gain|Phosphorylation	4547	GE	HERVHF	NM_002930/-/['COSMIC', 'ICGC']
NonCanon	Q99578	RIT2	18	40323674	438	A	C	146	E	D	possibly damaging	DOID:10534 / stomach cancer/HERVH	-	4547	GE	HERVHF	NM_002930/-/['ICGC', 'TCGA']
NonCanon	Q9H0M5	ZNF700	19	12058011	88	G	A	30	E	K	benign	DOID:1324 / lung cancer/HERVE	-	4618	GE	HERVERI	NM_001271848/-/['ICGC', 'COSMIC']
NonCanon	Q9H0M5	ZNF700	19	12058011	79	G	A	27	E	K	benign	DOID:1324 / lung cancer/HERVE	-	4618	GE	HERVERI	NM_144566/-/['ICGC', 'COSMIC']
NonCanon	Q9H0M5	ZNF700	19	12058023	91	G	A	31	V	M	probably damaging	DOID:2531 / hematologic cancer/HERVE	-	4618	GE	HERVERI	NM_144566/24241536/['COSMIC']
NonCanon	Q9H0M5	ZNF700	19	12058023	100	G	A	34	V	M	probably damaging	DOID:2531 / hematologic cancer/HERVE	-	4618	GE	HERVERI	NM_001271848/24241536/['COSMIC']
NonCanon	Q9H0M5	ZNF700	19	12058086	154	G	C	52	V	L	probably damaging	DOID:219 / colon cancer/HERVE	-	4618	GE	HERVERI	NM_144566/-/['COSMIC', 'ICGC', 'TCGA']
NonCanon	Q9H0M5	ZNF700	19	12058086	163	G	C	55	V	L	probably damaging	DOID:219 / colon cancer/HERVE	-	4618	GE	HERVERI	NM_001271848/-/['COSMIC', 'ICGC', 'TCGA']
NonCanon	Q9H0M5	ZNF700	19	12058091	168	G	A	56	M	I	probably damaging	DOID:1612 / breast cancer/HERVE	-	4618	GE	HERVERI	NM_001271848/-/['IntOGen']
NonCanon	Q9H0M5	ZNF700	19	12058091	159	G	A	53	M	I	probably damaging	DOID:1612 / breast cancer/HERVE	-	4618	GE	HERVERI	NM_144566/-/['IntOGen']
NonCanon	Q9H0M5	ZNF700	19	12058329	200	G	A	67	G	E	probably damaging	DOID:10283 / prostate cancer/HERVE	-	4618	GE	HERVERI	NM_001271848/-/['TCGA']
NonCanon	Q9H0M5	ZNF700	19	12058329	191	G	A	64	G	E	probably damaging	DOID:10283 / prostate cancer/HERVE	Gain|Phosphorylation	4618	GE	HERVERI	NM_144566/-/['TCGA']
NonCanon	Q9H0M5	ZNF700	19	12058339	201	G	C	67	W	C	probably damaging	DOID:11934 / head and neck cancer/HERVE	-	4618	GE	HERVERI	NM_144566/-/['TCGA']
NonCanon	Q9H0M5	ZNF700	19	12058339	210	G	C	70	W	C	probably damaging	DOID:11934 / head and neck cancer/HERVE	-	4618	GE	HERVERI	NM_001271848/-/['TCGA']
NonCanon	Q9H0M5	ZNF700	19	12058339	201	G	C	67	W	C	probably damaging	DOID:0060119 / pharynx cancer/HERVE	-	4618	GE	HERVERI	NM_144566/-/['IntOGen']
NonCanon	Q9H0M5	ZNF700	19	12058339	210	G	C	70	W	C	probably damaging	DOID:0060119 / pharynx cancer/HERVE	-	4618	GE	HERVERI	NM_001271848/-/['IntOGen']
NonCanon	Q9H0M5	ZNF700	19	12058344	206	A	G	69	D	G	benign	DOID:263 / kidney cancer/HERVE	Gain|Phosphorylation	4618	GE	HERVERI	NM_144566/-/['COSMIC']
NonCanon	Q9H0M5	ZNF700	19	12058344	215	A	G	72	D	G	benign	DOID:263 / kidney cancer/HERVE	-	4618	GE	HERVERI	NM_001271848/-/['COSMIC']
NonCanon	Q9H0M5	ZNF700	19	12058355	217	G	C	73	E	Q	possibly damaging	DOID:11054 / urinary bladder cancer/HERVE	Gain|Phosphorylation	4618	GE	HERVERI	NM_144566/-/['ICGC', 'COSMIC']	NM_144566/24121792/['COSMIC']
NonCanon	Q9H0M5	ZNF700	19	12058355	226	G	C	76	E	Q	possibly damaging	DOID:11054 / urinary bladder cancer/HERVE	-	4618	GE	HERVERI	NM_001271848/-/['ICGC', 'COSMIC']	NM_001271848/24121792/['COSMIC']
NonCanon	Q9H0M5	ZNF700	19	12058364	226	T	C	76	Y	H	benign	DOID:10283 / prostate cancer/HERVE	Gain|Phosphorylation	4618	GE	HERVERI	NM_144566/22722839/['COSMIC']
NonCanon	Q9H0M5	ZNF700	19	12058364	235	T	C	79	Y	H	benign	DOID:10283 / prostate cancer/HERVE	-	4618	GE	HERVERI	NM_001271848/22722839/['COSMIC']
NonCanon	Q9H0M5	ZNF700	19	12059101	271	G	A	91	E	K	benign	DOID:1192 / peripheral nervous system neoplasm/HERVE	-	4618	GE	HERVERI	NM_001271848/23334666/['COSMIC']
NonCanon	Q9H0M5	ZNF700	19	12059101	262	G	A	88	E	K	benign	DOID:1192 / peripheral nervous system neoplasm/HERVE	-	4618	GE	HERVERI	NM_144566/23334666/['COSMIC']
NonCanon	Q9H0M5	ZNF700	19	12059106	267	G	T	89	E	D	possibly damaging	DOID:363 / uterine cancer/HERVE	-	4618	GE	HERVERI	NM_144566/-/['COSMIC', 'TCGA']
NonCanon	Q9H0M5	ZNF700	19	12059106	276	G	T	92	E	D	possibly damaging	DOID:363 / uterine cancer/HERVE	-	4618	GE	HERVERI	NM_001271848/-/['COSMIC', 'TCGA']
NonCanon	Q9H0M5	ZNF700	19	12059116	277	G	A	93	E	K	probably damaging	DOID:11934 / head and neck cancer/HERVE	-	4618	GE	HERVERI	NM_144566/-/['TCGA']
NonCanon	Q9H0M5	ZNF700	19	12059116	286	G	A	96	E	K	probably damaging	DOID:11934 / head and neck cancer/HERVE	-	4618	GE	HERVERI	NM_001271848/-/['TCGA']
NonCanon	Q9H0M5	ZNF700	19	12059125	295	G	T	99	E	X	-	DOID:363 / uterine cancer/HERVE	-	4618	GE	HERVERI	NM_001271848/-/['TCGA', 'COSMIC']
NonCanon	Q9H0M5	ZNF700	19	12059125	286	G	T	96	E	X	-	DOID:363 / uterine cancer/HERVE	-	4618	GE	HERVERI	NM_144566/-/['TCGA', 'COSMIC']
NonCanon	Q9H0M5	ZNF700	19	12059149	319	T	G	107	F	V	possibly damaging	DOID:4159 / skin cancer/HERVE	-	4618	GE	HERVERI	NM_001271848/-/['ICGC', 'TCGA']
NonCanon	Q9H0M5	ZNF700	19	12059149	310	T	G	104	F	V	possibly damaging	DOID:4159 / skin cancer/HERVE	-	4618	GE	HERVERI	NM_144566/-/['ICGC', 'TCGA']
NonCanon	Q9H0M5	ZNF700	19	12059171	341	G	T	114	R	I	benign	DOID:1793 / pancreatic cancer/HERVE	-	4618	GE	HERVERI	NM_001271848/24293293/['COSMIC']
NonCanon	Q9H0M5	ZNF700	19	12059171	332	G	T	111	R	I	benign	DOID:1793 / pancreatic cancer/HERVE	-	4618	GE	HERVERI	NM_144566/24293293/['COSMIC']
NonCanon	Q9H0M5	ZNF700	19	12059255	416	C	G	139	S	X	-	DOID:1612 / breast cancer/HERVE	-	4618	GE	HERVERI	NM_144566/-/['IntOGen', 'ICGC', 'COSMIC', 'TCGA']
NonCanon	Q9H0M5	ZNF700	19	12059255	425	C	G	142	S	X	-	DOID:1612 / breast cancer/HERVE	-	4618	GE	HERVERI	NM_001271848/-/['IntOGen', 'ICGC', 'COSMIC', 'TCGA']
NonCanon	Q9H0M5	ZNF700	19	12059258	419	C	A	140	S	Y	probably damaging	DOID:363 / uterine cancer/HERVE	-	4618	GE	HERVERI	NM_144566/-/['COSMIC', 'IntOGen', 'TCGA']
NonCanon	Q9H0M5	ZNF700	19	12059258	428	C	A	143	S	Y	probably damaging	DOID:363 / uterine cancer/HERVE	-	4618	GE	HERVERI	NM_001271848/-/['COSMIC', 'IntOGen', 'TCGA']
NonCanon	Q9H0M5	ZNF700	19	12059270	431	G	T	144	S	I	benign	DOID:363 / uterine cancer/HERVE	-	4618	GE	HERVERI	NM_144566/-/['TCGA', 'COSMIC']
NonCanon	Q9H0M5	ZNF700	19	12059270	440	G	T	147	S	I	benign	DOID:363 / uterine cancer/HERVE	-	4618	GE	HERVERI	NM_001271848/-/['TCGA', 'COSMIC']
NonCanon	Q9H0M5	ZNF700	19	12059282	452	A	G	151	D	G	probably damaging	DOID:219 / colon cancer/HERVE	-	4618	GE	HERVERI	NM_001271848/22810696/['COSMIC']
NonCanon	Q9H0M5	ZNF700	19	12059282	443	A	G	148	D	G	probably damaging	DOID:219 / colon cancer/HERVE	-	4618	GE	HERVERI	NM_144566/22810696/['COSMIC']
NonCanon	Q9H0M5	ZNF700	19	12059292	462	C	G	154	H	Q	probably damaging	DOID:11934 / head and neck cancer/HERVE	-	4618	GE	HERVERI	NM_001271848/-/['TCGA']
NonCanon	Q9H0M5	ZNF700	19	12059292	453	C	G	151	H	Q	probably damaging	DOID:11934 / head and neck cancer/HERVE	-	4618	GE	HERVERI	NM_144566/-/['TCGA']
NonCanon	Q9H0M5	ZNF700	19	12059318	479	G	T	160	G	V	possibly damaging	DOID:1612 / breast cancer/HERVE	Gain|Phosphorylation	4618	GE	HERVERI	NM_144566/-/['IntOGen', 'ICGC', 'TCGA', 'COSMIC']
NonCanon	Q9H0M5	ZNF700	19	12059318	488	G	T	163	G	V	possibly damaging	DOID:1612 / breast cancer/HERVE	-	4618	GE	HERVERI	NM_001271848/-/['IntOGen', 'ICGC', 'TCGA', 'COSMIC']
NonCanon	Q9H0M5	ZNF700	19	12059355	525	G	T	175	K	N	probably damaging	DOID:1993 / rectum cancer/HERVE	-	4618	GE	HERVERI	NM_001271848/22810696/['COSMIC']
NonCanon	Q9H0M5	ZNF700	19	12059355	516	G	T	172	K	N	probably damaging	DOID:1993 / rectum cancer/HERVE	-	4618	GE	HERVERI	NM_144566/22810696/['COSMIC']
NonCanon	Q9H0M5	ZNF700	19	12059372	533	G	A	178	R	H	benign	DOID:10534 / stomach cancer/HERVE	-	4618	GE	HERVERI	NM_144566/-/['ICGC', 'TCGA']
NonCanon	Q9H0M5	ZNF700	19	12059372	542	G	A	181	R	H	benign	DOID:10534 / stomach cancer/HERVE	-	4618	GE	HERVERI	NM_001271848/-/['ICGC', 'TCGA']
NonCanon	Q9H0M5	ZNF700	19	12059392	562	G	T	188	E	X	-	DOID:363 / uterine cancer/HERVE	-	4618	GE	HERVERI	NM_001271848/-/['COSMIC', 'TCGA']
NonCanon	Q9H0M5	ZNF700	19	12059392	553	G	T	185	E	X	-	DOID:363 / uterine cancer/HERVE	-	4618	GE	HERVERI	NM_144566/-/['COSMIC', 'TCGA']
NonCanon	Q9H0M5	ZNF700	19	12059396	566	G	C	189	R	T	benign	DOID:4159 / skin cancer/HERVE	-	4618	GE	HERVERI	NM_001271848/-/['ICGC', 'TCGA']
NonCanon	Q9H0M5	ZNF700	19	12059396	557	G	C	186	R	T	benign	DOID:4159 / skin cancer/HERVE	-	4618	GE	HERVERI	NM_144566/-/['ICGC', 'TCGA']
NonCanon	Q9H0M5	ZNF700	19	12059397	567	G	T	189	R	S	possibly damaging	DOID:2531 / hematologic cancer/HERVE	-	4618	GE	HERVERI	NM_001271848/23292937/['COSMIC']
NonCanon	Q9H0M5	ZNF700	19	12059397	558	G	T	186	R	S	possibly damaging	DOID:2531 / hematologic cancer/HERVE	Gain|Phosphorylation	4618	GE	HERVERI	NM_144566/23292937/['COSMIC']
NonCanon	Q9H0M5	ZNF700	19	12059434	604	T	G	202	C	G	probably damaging	DOID:219 / colon cancer/HERVE	-	4618	GE	HERVERI	NM_001271848/22810696/['COSMIC']
NonCanon	Q9H0M5	ZNF700	19	12059434	595	T	G	199	C	G	probably damaging	DOID:219 / colon cancer/HERVE	-	4618	GE	HERVERI	NM_144566/22810696/['COSMIC']
NonCanon	Q9H0M5	ZNF700	19	12059437	598	G	T	200	G	X	-	DOID:1324 / lung cancer/HERVE	-	4618	GE	HERVERI	NM_144566/-/['COSMIC', 'IntOGen', 'ICGC', 'TCGA']
NonCanon	Q9H0M5	ZNF700	19	12059437	607	G	T	203	G	X	-	DOID:1324 / lung cancer/HERVE	-	4618	GE	HERVERI	NM_001271848/-/['COSMIC', 'IntOGen', 'ICGC', 'TCGA']
NonCanon	Q9H0M5	ZNF700	19	12059468	629	G	A	210	R	Q	benign	DOID:363 / uterine cancer/HERVE	-	4618	GE	HERVERI	NM_144566/-/['TCGA']
NonCanon	Q9H0M5	ZNF700	19	12059468	638	G	A	213	R	Q	benign	DOID:363 / uterine cancer/HERVE	-	4618	GE	HERVERI	NM_001271848/-/['TCGA']
NonCanon	Q9H0M5	ZNF700	19	12059468	629	G	A	210	R	Q	benign	DOID:1324 / lung cancer/HERVE	-	4618	GE	HERVERI	NM_144566/23033341/['COSMIC']
NonCanon	Q9H0M5	ZNF700	19	12059468	638	G	A	213	R	Q	benign	DOID:1324 / lung cancer/HERVE	-	4618	GE	HERVERI	NM_001271848/23033341/['COSMIC']
NonCanon	Q9H0M5	ZNF700	19	12059468	629	G	A	210	R	Q	benign	DOID:1993 / rectum cancer/HERVE	-	4618	GE	HERVERI	NM_144566/-/['COSMIC', 'ICGC', 'TCGA']
NonCanon	Q9H0M5	ZNF700	19	12059468	638	G	A	213	R	Q	benign	DOID:1993 / rectum cancer/HERVE	-	4618	GE	HERVERI	NM_001271848/-/['COSMIC', 'ICGC', 'TCGA']
NonCanon	Q9H0M5	ZNF700	19	12059482	652	A	G	218	M	V	benign	DOID:3571 / liver cancer/HERVE	-	4618	GE	HERVERI	NM_001271848/-/['ICGC', 'COSMIC']
NonCanon	Q9H0M5	ZNF700	19	12059482	643	A	G	215	M	V	benign	DOID:3571 / liver cancer/HERVE	Gain|Phosphorylation	4618	GE	HERVERI	NM_144566/-/['ICGC', 'COSMIC']
NonCanon	Q9H0M5	ZNF700	19	12059494	664	G	T	222	D	Y	probably damaging	DOID:11934 / head and neck cancer/HERVE	-	4618	GE	HERVERI	NM_001271848/-/['TCGA']
NonCanon	Q9H0M5	ZNF700	19	12059494	655	G	T	219	D	Y	probably damaging	DOID:11934 / head and neck cancer/HERVE	-	4618	GE	HERVERI	NM_144566/-/['TCGA']
NonCanon	Q9H0M5	ZNF700	19	12059494	655	G	T	219	D	Y	probably damaging	DOID:0060119 / pharynx cancer/HERVE	-	4618	GE	HERVERI	NM_144566/-/['IntOGen']
NonCanon	Q9H0M5	ZNF700	19	12059494	664	G	T	222	D	Y	probably damaging	DOID:0060119 / pharynx cancer/HERVE	-	4618	GE	HERVERI	NM_001271848/-/['IntOGen']
NonCanon	Q9H0M5	ZNF700	19	12059503	673	T	C	225	Y	H	probably damaging	DOID:10534 / stomach cancer/HERVE	-	4618	GE	HERVERI	NM_001271848/-/['ICGC', 'TCGA']
NonCanon	Q9H0M5	ZNF700	19	12059503	664	T	C	222	Y	H	probably damaging	DOID:10534 / stomach cancer/HERVE	-	4618	GE	HERVERI	NM_144566/-/['ICGC', 'TCGA']
NonCanon	Q9H0M5	ZNF700	19	12059506	667	A	T	223	K	X	-	DOID:3571 / liver cancer/HERVE	-	4618	GE	HERVERI	NM_144566/-/['TCGA']
NonCanon	Q9H0M5	ZNF700	19	12059506	676	A	T	226	K	X	-	DOID:3571 / liver cancer/HERVE	-	4618	GE	HERVERI	NM_001271848/-/['TCGA']
NonCanon	Q9H0M5	ZNF700	19	12059564	734	G	T	245	R	I	possibly damaging	DOID:219 / colon cancer/HERVE	-	4618	GE	HERVERI	NM_001271848/-/['COSMIC', 'ICGC', 'TCGA']
NonCanon	Q9H0M5	ZNF700	19	12059564	725	G	T	242	R	I	possibly damaging	DOID:219 / colon cancer/HERVE	-	4618	GE	HERVERI	NM_144566/-/['COSMIC', 'ICGC', 'TCGA']
NonCanon	Q9H0M5	ZNF700	19	12059564	734	G	T	245	R	I	possibly damaging	DOID:1521 / cecum cancer/HERVE	-	4618	GE	HERVERI	NM_001271848/22810696/['COSMIC']
NonCanon	Q9H0M5	ZNF700	19	12059564	725	G	T	242	R	I	possibly damaging	DOID:1521 / cecum cancer/HERVE	-	4618	GE	HERVERI	NM_144566/22810696/['COSMIC']
NonCanon	Q9H0M5	ZNF700	19	12059635	796	C	G	266	Q	E	possibly damaging	DOID:11934 / head and neck cancer/HERVE	-	4618	GE	HERVERI	NM_144566/-/['TCGA']
NonCanon	Q9H0M5	ZNF700	19	12059635	805	C	G	269	Q	E	possibly damaging	DOID:11934 / head and neck cancer/HERVE	-	4618	GE	HERVERI	NM_001271848/-/['TCGA']
NonCanon	Q9H0M5	ZNF700	19	12059656	826	A	T	276	T	S	possibly damaging	DOID:1993 / rectum cancer/HERVE	-	4618	GE	HERVERI	NM_001271848/-/['ICGC', 'TCGA', 'COSMIC']
NonCanon	Q9H0M5	ZNF700	19	12059656	817	A	T	273	T	S	possibly damaging	DOID:1993 / rectum cancer/HERVE	Gain|Phosphorylation	4618	GE	HERVERI	NM_144566/-/['ICGC', 'TCGA', 'COSMIC']
NonCanon	Q9H0M5	ZNF700	19	12059662	832	G	T	278	E	X	-	DOID:1324 / lung cancer/HERVE	-	4618	GE	HERVERI	NM_001271848/-/['IntOGen']
NonCanon	Q9H0M5	ZNF700	19	12059662	823	G	T	275	E	X	-	DOID:1324 / lung cancer/HERVE	-	4618	GE	HERVERI	NM_144566/-/['IntOGen']
NonCanon	Q9H0M5	ZNF700	19	12059692	853	A	G	285	K	E	probably damaging	DOID:2531 / hematologic cancer/HERVE	-	4618	GE	HERVERI	NM_144566/23292937/['COSMIC']
NonCanon	Q9H0M5	ZNF700	19	12059692	862	A	G	288	K	E	probably damaging	DOID:2531 / hematologic cancer/HERVE	-	4618	GE	HERVERI	NM_001271848/23292937/['COSMIC']
NonCanon	Q9H0M5	ZNF700	19	12059714	884	C	T	295	S	F	probably damaging	DOID:363 / uterine cancer/HERVE	-	4618	GE	HERVERI	NM_001271848/-/['COSMIC', 'TCGA']
NonCanon	Q9H0M5	ZNF700	19	12059714	875	C	T	292	S	F	probably damaging	DOID:363 / uterine cancer/HERVE	-	4618	GE	HERVERI	NM_144566/-/['COSMIC', 'TCGA']
NonCanon	Q9H0M5	ZNF700	19	12059732	902	G	T	301	R	I	possibly damaging	DOID:363 / uterine cancer/HERVE	-	4618	GE	HERVERI	NM_001271848/-/['COSMIC', 'TCGA']
NonCanon	Q9H0M5	ZNF700	19	12059732	893	G	T	298	R	I	possibly damaging	DOID:363 / uterine cancer/HERVE	-	4618	GE	HERVERI	NM_144566/-/['COSMIC', 'TCGA']
NonCanon	Q9H0M5	ZNF700	19	12059734	904	A	G	302	S	G	possibly damaging	DOID:4159 / skin cancer/HERVE	-	4618	GE	HERVERI	NM_001271848/-/['ICGC', 'TCGA']
NonCanon	Q9H0M5	ZNF700	19	12059734	895	A	G	299	S	G	possibly damaging	DOID:4159 / skin cancer/HERVE	-	4618	GE	HERVERI	NM_144566/-/['ICGC', 'TCGA']
NonCanon	Q9H0M5	ZNF700	19	12059798	959	C	A	320	S	Y	benign	DOID:363 / uterine cancer/HERVE	-	4618	GE	HERVERI	NM_144566/-/['TCGA', 'COSMIC']
NonCanon	Q9H0M5	ZNF700	19	12059798	968	C	A	323	S	Y	benign	DOID:363 / uterine cancer/HERVE	-	4618	GE	HERVERI	NM_001271848/-/['TCGA', 'COSMIC']
NonCanon	Q8N7Q3	ZNF676	19	22379402	34	G	C	12	G	R	probably damaging	DOID:1324 / lung cancer/HML6	-	4665	AB		NM_001001411/22980975/['COSMIC']
NonCanon	Q8N7Q3	ZNF676	19	22379411	25	G	A	9	V	I	possibly damaging	DOID:10534 / stomach cancer/HML6	-	4665	AB		NM_001001411/-/['ICGC', 'TCGA']
NonCanon	Q8N7Q3	ZNF676	19	22379425	11	A	T	4	N	I	probably damaging	DOID:1324 / lung cancer/HML6	-	4665	AB		NM_001001411/-/['IntOGen', 'ICGC', 'TCGA', 'COSMIC']
NonCanon	Q8N7Q3	ZNF676	19	22379435	1	A	T	1	M	L	benign	DOID:1324 / lung cancer/HML6	-	4665	AB		NM_001001411/-/['COSMIC']
NonCanon	A8MXY4	ZNF99	19	22940123	2588	T	G	863	M	R	probably damaging	DOID:5041 / esophageal cancer/HERVW	-	4673	GE	HERVW9	NM_001080409/-/['ICGC']
NonCanon	A8MXY4	ZNF99	19	22940130	2581	G	C	861	E	Q	benign	DOID:1324 / lung cancer/HERVW	-	4673	GE	HERVW9	NM_001080409/-/['IntOGen']
NonCanon	A8MXY4	ZNF99	19	22940135	2576	C	A	859	P	H	-	DOID:3571 / liver cancer/HERVW	-	4673	GE	HERVW9	NM_001080409/-/['COSMIC', 'ICGC']
NonCanon	A8MXY4	ZNF99	19	22940251	2460	A	C	820	E	D	probably damaging	DOID:5041 / esophageal cancer/HERVW	-	4673	GE	HERVW9	NM_001080409/23525077/['COSMIC']
NonCanon	A8MXY4	ZNF99	19	22940264	2447	C	T	816	S	F	benign	DOID:4159 / skin cancer/HERVW	-	4673	GE	HERVW9	NM_001080409/-/['ICGC', 'TCGA']
NonCanon	A8MXY4	ZNF99	19	22940294	2417	A	T	806	K	I	benign	DOID:4159 / skin cancer/HERVW	Gain|Phosphorylation	4673	GE	HERVW9	NM_001080409/-/['ICGC', 'TCGA']
NonCanon	A8MXY4	ZNF99	19	22940298	2413	A	G	805	R	G	benign	DOID:1324 / lung cancer/HERVW	Gain|Glycosylation	4673	GE	HERVW9	NM_001080409/-/['COSMIC', 'IntOGen', 'ICGC', 'TCGA']
NonCanon	A8MXY4	ZNF99	19	22940301	2410	C	T	804	L	F	probably damaging	DOID:1324 / lung cancer/HERVW	Gain|Glycosylation	4673	GE	HERVW9	NM_001080409/-/['COSMIC', 'IntOGen']
NonCanon	A8MXY4	ZNF99	19	22940309	2402	C	T	801	S	F	benign	DOID:4159 / skin cancer/HERVW	-	4673	GE	HERVW9	NM_001080409/-/['ICGC', 'TCGA']
NonCanon	A8MXY4	ZNF99	19	22940321	2390	C	T	797	A	V	possibly damaging	DOID:5041 / esophageal cancer/HERVW	-	4673	GE	HERVW9	NM_001080409/-/['COSMIC', 'ICGC']
NonCanon	A8MXY4	ZNF99	19	22940339	2372	G	T	791	C	F	probably damaging	DOID:1324 / lung cancer/HERVW	-	4673	GE	HERVW9	NM_001080409/-/['COSMIC', 'IntOGen']
NonCanon	A8MXY4	ZNF99	19	22940341	2370	A	T	790	K	N	probably damaging	DOID:1324 / lung cancer/HERVW	-	4673	GE	HERVW9	NM_001080409/22980975/['COSMIC']
NonCanon	A8MXY4	ZNF99	19	22940345	2366	A	T	789	Y	F	possibly damaging	DOID:11934 / head and neck cancer/HERVW	-	4673	GE	HERVW9	NM_001080409/-/['TCGA']
NonCanon	A8MXY4	ZNF99	19	22940345	2366	A	T	789	Y	F	possibly damaging	DOID:0060119 / pharynx cancer/HERVW	-	4673	GE	HERVW9	NM_001080409/-/['IntOGen']
NonCanon	A8MXY4	ZNF99	19	22940351	2360	A	T	787	K	I	possibly damaging	DOID:219 / colon cancer/HERVW	-	4673	GE	HERVW9	NM_001080409/-/['COSMIC']
NonCanon	A8MXY4	ZNF99	19	22940355	2356	A	G	786	K	E	benign	DOID:1909 / melanoma/HERVW	-	4673	GE	HERVW9	NM_001080409/24265154/['COSMIC']
NonCanon	A8MXY4	ZNF99	19	22940373	2338	A	G	780	K	E	probably damaging	DOID:4159 / skin cancer/HERVW	-	4673	GE	HERVW9	NM_001080409/-/['ICGC', 'TCGA']
NonCanon	A8MXY4	ZNF99	19	22940373	2338	A	G	780	K	E	probably damaging	DOID:1324 / lung cancer/HERVW	-	4673	GE	HERVW9	NM_001080409/22980975/['COSMIC']	NM_001080409/-/['IntOGen', 'ICGC', 'TCGA', 'COSMIC']
NonCanon	A8MXY4	ZNF99	19	22940373	2338	A	G	780	K	E	probably damaging	DOID:1793 / pancreatic cancer/HERVW	-	4673	GE	HERVW9	NM_001080409/-/['TCGA']
NonCanon	A8MXY4	ZNF99	19	22940373	2338	A	G	780	K	E	probably damaging	DOID:10283 / prostate cancer/HERVW	-	4673	GE	HERVW9	NM_001080409/-/['COSMIC', 'ICGC', 'TCGA']
NonCanon	A8MXY4	ZNF99	19	22940373	2338	A	G	780	K	E	probably damaging	DOID:263 / kidney cancer/HERVW	-	4673	GE	HERVW9	NM_001080409/-/['COSMIC']
NonCanon	A8MXY4	ZNF99	19	22940381	2330	G	A	777	R	K	benign	DOID:11054 / urinary bladder cancer/HERVW	-	4673	GE	HERVW9	NM_001080409/-/['COSMIC', 'IntOGen', 'ICGC', 'TCGA']
NonCanon	A8MXY4	ZNF99	19	22940385	2326	C	T	776	L	F	probably damaging	DOID:1324 / lung cancer/HERVW	-	4673	GE	HERVW9	NM_001080409/-/['COSMIC']
NonCanon	A8MXY4	ZNF99	19	22940398	2313	G	C	771	K	N	benign	DOID:3571 / liver cancer/HERVW	-	4673	GE	HERVW9	NM_001080409/-/['COSMIC']
NonCanon	A8MXY4	ZNF99	19	22940411	2300	G	T	767	G	V	probably damaging	DOID:363 / uterine cancer/HERVW	-	4673	GE	HERVW9	NM_001080409/-/['COSMIC', 'IntOGen', 'TCGA']
NonCanon	A8MXY4	ZNF99	19	22940429	2282	G	C	761	C	S	benign	DOID:1324 / lung cancer/HERVW	-	4673	GE	HERVW9	NM_001080409/-/['IntOGen', 'ICGC', 'TCGA', 'COSMIC']
NonCanon	A8MXY4	ZNF99	19	22940429	2282	G	C	761	C	S	benign	DOID:1793 / pancreatic cancer/HERVW	-	4673	GE	HERVW9	NM_001080409/-/['TCGA']
NonCanon	A8MXY4	ZNF99	19	22940429	2282	G	C	761	C	S	benign	DOID:3571 / liver cancer/HERVW	-	4673	GE	HERVW9	NM_001080409/-/['TCGA']
NonCanon	A8MXY4	ZNF99	19	22940439	2272	G	C	758	E	Q	probably damaging	DOID:263 / kidney cancer/HERVW	-	4673	GE	HERVW9	NM_001080409/-/['COSMIC', 'IntOGen', 'ICGC', 'TCGA']
NonCanon	A8MXY4	ZNF99	19	22940441	2270	C	G	757	A	G	benign	DOID:263 / kidney cancer/HERVW	-	4673	GE	HERVW9	NM_001080409/-/['TCGA']
NonCanon	A8MXY4	ZNF99	19	22940442	2269	G	T	757	A	S	possibly damaging	DOID:1324 / lung cancer/HERVW	-	4673	GE	HERVW9	NM_001080409/-/['IntOGen']
NonCanon	A8MXY4	ZNF99	19	22940448	2263	C	G	755	H	D	probably damaging	DOID:1324 / lung cancer/HERVW	-	4673	GE	HERVW9	NM_001080409/-/['COSMIC', 'IntOGen']
NonCanon	A8MXY4	ZNF99	19	22940448	2263	C	A	755	H	N	probably damaging	DOID:1793 / pancreatic cancer/HERVW	-	4673	GE	HERVW9	NM_001080409/-/['TCGA']
NonCanon	A8MXY4	ZNF99	19	22940456	2255	A	C	752	K	T	probably damaging	DOID:5041 / esophageal cancer/HERVW	Gain|Phosphorylation	4673	GE	HERVW9	NM_001080409/-/['ICGC']
NonCanon	A8MXY4	ZNF99	19	22940484	2227	A	C	743	K	Q	benign	DOID:1793 / pancreatic cancer/HERVW	Gain|Phosphorylation	4673	GE	HERVW9	NM_001080409/-/['TCGA']
NonCanon	A8MXY4	ZNF99	19	22940499	2212	T	G	738	C	G	probably damaging	DOID:1793 / pancreatic cancer/HERVW	Gain|Phosphorylation	4673	GE	HERVW9	NM_001080409/-/['COSMIC', 'ICGC']
NonCanon	A8MXY4	ZNF99	19	22940502	2209	G	T	737	E	X	-	DOID:219 / colon cancer/HERVW	-	4673	GE	HERVW9	NM_001080409/22810696/['COSMIC']
NonCanon	A8MXY4	ZNF99	19	22940502	2209	G	A	737	E	K	probably damaging	DOID:1993 / rectum cancer/HERVW	Gain|Phosphorylation	4673	GE	HERVW9	NM_001080409/-/['ICGC', 'TCGA', 'COSMIC']
NonCanon	A8MXY4	ZNF99	19	22940512	2199	C	A	733	Y	X	-	DOID:11934 / head and neck cancer/HERVW	-	4673	GE	HERVW9	NM_001080409/-/['TCGA']
NonCanon	A8MXY4	ZNF99	19	22940512	2199	C	A	733	Y	X	-	DOID:0060119 / pharynx cancer/HERVW	-	4673	GE	HERVW9	NM_001080409/-/['IntOGen']
NonCanon	A8MXY4	ZNF99	19	22940517	2194	C	T	732	P	S	probably damaging	DOID:5041 / esophageal cancer/HERVW	Gain|Phosphorylation	4673	GE	HERVW9	NM_001080409/23525077/['COSMIC']
NonCanon	A8MXY4	ZNF99	19	22940528	2183	C	A	728	T	N	possibly damaging	DOID:1993 / rectum cancer/HERVW	-	4673	GE	HERVW9	NM_001080409/22810696/['COSMIC']
NonCanon	A8MXY4	ZNF99	19	22940532	2179	C	T	727	H	Y	probably damaging	DOID:4159 / skin cancer/HERVW	-	4673	GE	HERVW9	NM_001080409/-/['ICGC', 'TCGA']
NonCanon	A8MXY4	ZNF99	19	22940535	2176	A	C	726	I	L	possibly damaging	DOID:5041 / esophageal cancer/HERVW	-	4673	GE	HERVW9	NM_001080409/-/['ICGC']
NonCanon	A8MXY4	ZNF99	19	22940553	2158	C	G	720	L	V	probably damaging	DOID:11934 / head and neck cancer/HERVW	Gain|Phosphorylation	4673	GE	HERVW9	NM_001080409/-/['TCGA']
NonCanon	A8MXY4	ZNF99	19	22940553	2158	C	G	720	L	V	probably damaging	DOID:0060119 / pharynx cancer/HERVW	Gain|Phosphorylation	4673	GE	HERVW9	NM_001080409/-/['IntOGen']
NonCanon	A8MXY4	ZNF99	19	22940555	2156	C	T	719	T	I	possibly damaging	DOID:11934 / head and neck cancer/HERVW	Gain|Phosphorylation	4673	GE	HERVW9	NM_001080409/-/['TCGA']
NonCanon	A8MXY4	ZNF99	19	22940555	2156	C	A	719	T	N	benign	DOID:219 / colon cancer/HERVW	Gain|Phosphorylation	4673	GE	HERVW9	NM_001080409/-/['IntOGen']	NM_001080409/22810696/['COSMIC']
NonCanon	A8MXY4	ZNF99	19	22940558	2153	C	G	718	S	X	-	DOID:1324 / lung cancer/HERVW	-	4673	GE	HERVW9	NM_001080409/22980975/['COSMIC']
NonCanon	A8MXY4	ZNF99	19	22940573	2138	C	T	713	A	V	probably damaging	DOID:4159 / skin cancer/HERVW	Gain|Phosphorylation	4673	GE	HERVW9	NM_001080409/-/['ICGC', 'TCGA']
NonCanon	A8MXY4	ZNF99	19	22940586	2125	G	C	709	E	Q	possibly damaging	DOID:11934 / head and neck cancer/HERVW	-	4673	GE	HERVW9	NM_001080409/-/['TCGA']
NonCanon	A8MXY4	ZNF99	19	22940586	2125	G	C	709	E	Q	possibly damaging	DOID:0060119 / pharynx cancer/HERVW	-	4673	GE	HERVW9	NM_001080409/-/['IntOGen']
NonCanon	A8MXY4	ZNF99	19	22940586	2125	G	C	709	E	Q	possibly damaging	DOID:8618 / oral cavity cancer/HERVW	-	4673	GE	HERVW9	NM_001080409/23619168/['COSMIC']
NonCanon	A8MXY4	ZNF99	19	22940594	2117	A	C	706	K	T	probably damaging	DOID:363 / uterine cancer/HERVW	Gain|Phosphorylation	4673	GE	HERVW9	NM_001080409/-/['COSMIC', 'TCGA']
NonCanon	A8MXY4	ZNF99	19	22940600	2111	C	A	704	P	H	probably damaging	DOID:4159 / skin cancer/HERVW	-	4673	GE	HERVW9	NM_001080409/-/['ICGC', 'TCGA']
NonCanon	A8MXY4	ZNF99	19	22940600	2111	C	G	704	P	R	probably damaging	DOID:11934 / head and neck cancer/HERVW	-	4673	GE	HERVW9	NM_001080409/-/['TCGA']
NonCanon	A8MXY4	ZNF99	19	22940600	2111	C	G	704	P	R	probably damaging	DOID:0060119 / pharynx cancer/HERVW	-	4673	GE	HERVW9	NM_001080409/-/['IntOGen']
NonCanon	A8MXY4	ZNF99	19	22940607	2104	A	G	702	K	E	benign	DOID:1324 / lung cancer/HERVW	-	4673	GE	HERVW9	NM_001080409/22980975/['COSMIC']
NonCanon	A8MXY4	ZNF99	19	22940607	2104	A	G	702	K	E	benign	DOID:4362 / cervical cancer/HERVW	-	4673	GE	HERVW9	NM_001080409/-/['TCGA']
NonCanon	A8MXY4	ZNF99	19	22940607	2104	A	G	702	K	E	benign	DOID:1909 / melanoma/HERVW	-	4673	GE	HERVW9	NM_001080409/24265154/['COSMIC']
NonCanon	A8MXY4	ZNF99	19	22940609	2102	G	T	701	G	V	probably damaging	DOID:3571 / liver cancer/HERVW	-	4673	GE	HERVW9	NM_001080409/-/['TCGA']
NonCanon	A8MXY4	ZNF99	19	22940610	2101	G	T	701	G	X	-	DOID:3571 / liver cancer/HERVW	-	4673	GE	HERVW9	NM_001080409/-/['TCGA']
NonCanon	A8MXY4	ZNF99	19	22940616	2095	C	T	699	H	Y	probably damaging	DOID:4159 / skin cancer/HERVW	Gain|Phosphorylation	4673	GE	HERVW9	NM_001080409/-/['ICGC', 'TCGA']
NonCanon	A8MXY4	ZNF99	19	22940624	2087	A	C	696	K	T	possibly damaging	DOID:5041 / esophageal cancer/HERVW	Gain|Phosphorylation	4673	GE	HERVW9	NM_001080409/23525077/['COSMIC']
NonCanon	A8MXY4	ZNF99	19	22940624	2087	A	C	696	K	T	possibly damaging	DOID:363 / uterine cancer/HERVW	Gain|Phosphorylation	4673	GE	HERVW9	NM_001080409/-/['TCGA']
NonCanon	A8MXY4	ZNF99	19	22940625	2086	A	C	696	K	Q	possibly damaging	DOID:4362 / cervical cancer/HERVW	-	4673	GE	HERVW9	NM_001080409/-/['TCGA']
NonCanon	A8MXY4	ZNF99	19	22940633	2078	G	A	693	R	K	benign	DOID:363 / uterine cancer/HERVW	-	4673	GE	HERVW9	NM_001080409/-/['COSMIC', 'TCGA']
NonCanon	A8MXY4	ZNF99	19	22940642	2069	C	T	690	S	L	probably damaging	DOID:2531 / hematologic cancer/HERVW	-	4673	GE	HERVW9	NM_001080409/22158541/['COSMIC']	NM_001080409/-/['IntOGen', 'ICGC']
NonCanon	A8MXY4	ZNF99	19	22940644	2067	C	A	689	F	L	benign	DOID:219 / colon cancer/HERVW	-	4673	GE	HERVW9	NM_001080409/-/['ICGC', 'TCGA']
NonCanon	A8MXY4	ZNF99	19	22940644	2067	C	A	689	F	L	benign	DOID:1521 / cecum cancer/HERVW	-	4673	GE	HERVW9	NM_001080409/-/['COSMIC']
NonCanon	A8MXY4	ZNF99	19	22940645	2066	T	A	689	F	Y	probably damaging	DOID:1319 / brain cancer/HERVW	-	4673	GE	HERVW9	NM_001080409/-/['COSMIC', 'IntOGen']
NonCanon	A8MXY4	ZNF99	19	22940645	2066	T	A	689	F	Y	probably damaging	DOID:3070 / malignant glioma/HERVW	-	4673	GE	HERVW9	NM_001080409/-/['ICGC', 'TCGA']
NonCanon	A8MXY4	ZNF99	19	22940650	2061	C	A	687	N	K	benign	DOID:1324 / lung cancer/HERVW	Gain|Phosphorylation	4673	GE	HERVW9	NM_001080409/-/['COSMIC', 'ICGC']
NonCanon	A8MXY4	ZNF99	19	22940675	2036	G	T	679	C	F	probably damaging	DOID:1612 / breast cancer/HERVW	-	4673	GE	HERVW9	NM_001080409/-/['COSMIC', 'ICGC', 'TCGA']
NonCanon	A8MXY4	ZNF99	19	22940685	2026	C	T	676	P	S	possibly damaging	DOID:4159 / skin cancer/HERVW	Gain|Phosphorylation	4673	GE	HERVW9	NM_001080409/-/['TCGA']
NonCanon	A8MXY4	ZNF99	19	22940685	2026	C	T	676	P	S	possibly damaging	DOID:11934 / head and neck cancer/HERVW	Gain|Phosphorylation	4673	GE	HERVW9	NM_001080409/-/['TCGA']
NonCanon	A8MXY4	ZNF99	19	22940689	2022	G	C	674	E	D	benign	DOID:1324 / lung cancer/HERVW	-	4673	GE	HERVW9	NM_001080409/-/['COSMIC', 'IntOGen']
NonCanon	A8MXY4	ZNF99	19	22940690	2021	A	G	674	E	G	probably damaging	DOID:1319 / brain cancer/HERVW	-	4673	GE	HERVW9	NM_001080409/-/['COSMIC', 'IntOGen']
NonCanon	A8MXY4	ZNF99	19	22940690	2021	A	G	674	E	G	probably damaging	DOID:3070 / malignant glioma/HERVW	-	4673	GE	HERVW9	NM_001080409/-/['ICGC', 'TCGA']
NonCanon	A8MXY4	ZNF99	19	22940694	2017	G	A	673	E	K	benign	DOID:10534 / stomach cancer/HERVW	Gain|Phosphorylation	4673	GE	HERVW9	NM_001080409/-/['COSMIC']
NonCanon	A8MXY4	ZNF99	19	22940707	2004	A	C	668	K	N	probably damaging	DOID:10534 / stomach cancer/HERVW	-	4673	GE	HERVW9	NM_001080409/-/['ICGC', 'TCGA']
NonCanon	A8MXY4	ZNF99	19	22940721	1990	C	A	664	L	I	probably damaging	DOID:1324 / lung cancer/HERVW	Gain|Phosphorylation	4673	GE	HERVW9	NM_001080409/-/['COSMIC', 'IntOGen', 'ICGC', 'TCGA']
NonCanon	A8MXY4	ZNF99	19	22940729	1982	C	A	661	S	Y	possibly damaging	DOID:10534 / stomach cancer/HERVW	-	4673	GE	HERVW9	NM_001080409/-/['ICGC', 'TCGA']
NonCanon	A8MXY4	ZNF99	19	22940729	1982	C	T	661	S	F	benign	DOID:1612 / breast cancer/HERVW	-	4673	GE	HERVW9	NM_001080409/-/['TCGA']
NonCanon	A8MXY4	ZNF99	19	22940742	1969	G	T	657	A	S	possibly damaging	DOID:1612 / breast cancer/HERVW	Gain|Phosphorylation	4673	GE	HERVW9	NM_001080409/-/['IntOGen', 'ICGC', 'TCGA', 'COSMIC']
NonCanon	A8MXY4	ZNF99	19	22940748	1963	G	A	655	G	S	probably damaging	DOID:11934 / head and neck cancer/HERVW	Gain|Phosphorylation	4673	GE	HERVW9	NM_001080409/-/['TCGA']
NonCanon	A8MXY4	ZNF99	19	22940754	1957	G	A	653	E	K	possibly damaging	DOID:4159 / skin cancer/HERVW	-	4673	GE	HERVW9	NM_001080409/-/['ICGC', 'TCGA']
NonCanon	A8MXY4	ZNF99	19	22940775	1936	G	A	646	E	K	benign	DOID:4159 / skin cancer/HERVW	Gain|Phosphorylation	4673	GE	HERVW9	NM_001080409/-/['ICGC', 'TCGA']
NonCanon	A8MXY4	ZNF99	19	22940780	1931	C	G	644	T	S	benign	DOID:2394 / ovarian cancer/HERVW	-	4673	GE	HERVW9	NM_001080409/-/['COSMIC', 'ICGC']
NonCanon	A8MXY4	ZNF99	19	22940784	1927	C	T	643	H	Y	possibly damaging	DOID:4159 / skin cancer/HERVW	-	4673	GE	HERVW9	NM_001080409/-/['ICGC', 'TCGA']
NonCanon	A8MXY4	ZNF99	19	22940786	1925	T	G	642	I	S	probably damaging	DOID:4362 / cervical cancer/HERVW	Gain|Phosphorylation	4673	GE	HERVW9	NM_001080409/-/['TCGA']
NonCanon	A8MXY4	ZNF99	19	22940791	1920	G	T	640	E	D	benign	DOID:1324 / lung cancer/HERVW	Gain|Phosphorylation	4673	GE	HERVW9	NM_001080409/22980975/['COSMIC']
NonCanon	A8MXY4	ZNF99	19	22940791	1920	G	T	640	E	D	benign	DOID:219 / colon cancer/HERVW	Gain|Phosphorylation	4673	GE	HERVW9	NM_001080409/22810696/['COSMIC']
NonCanon	A8MXY4	ZNF99	19	22940792	1919	A	C	640	E	A	benign	DOID:1793 / pancreatic cancer/HERVW	Gain|Phosphorylation	4673	GE	HERVW9	NM_001080409/-/['COSMIC']
NonCanon	A8MXY4	ZNF99	19	22940807	1904	C	A	635	T	N	benign	DOID:219 / colon cancer/HERVW	Gain|Phosphorylation	4673	GE	HERVW9	NM_001080409/-/['COSMIC', 'ICGC', 'TCGA']
NonCanon	A8MXY4	ZNF99	19	22940808	1903	A	G	635	T	A	benign	DOID:11934 / head and neck cancer/HERVW	Gain|Phosphorylation	4673	GE	HERVW9	NM_001080409/-/['TCGA']
NonCanon	A8MXY4	ZNF99	19	22940808	1903	A	G	635	T	A	benign	DOID:0060119 / pharynx cancer/HERVW	Gain|Phosphorylation	4673	GE	HERVW9	NM_001080409/-/['IntOGen']
NonCanon	A8MXY4	ZNF99	19	22940817	1894	C	T	632	Q	X	-	DOID:11934 / head and neck cancer/HERVW	-	4673	GE	HERVW9	NM_001080409/-/['TCGA']
NonCanon	A8MXY4	ZNF99	19	22940817	1894	C	T	632	Q	X	-	DOID:0060119 / pharynx cancer/HERVW	-	4673	GE	HERVW9	NM_001080409/-/['IntOGen']
NonCanon	A8MXY4	ZNF99	19	22940826	1885	G	T	629	A	S	probably damaging	DOID:1324 / lung cancer/HERVW	Gain|Phosphorylation	4673	GE	HERVW9	NM_001080409/-/['IntOGen']
NonCanon	A8MXY4	ZNF99	19	22940827	1884	A	T	628	K	N	probably damaging	DOID:5041 / esophageal cancer/HERVW	-	4673	GE	HERVW9	NM_001080409/-/['ICGC', 'COSMIC']
NonCanon	A8MXY4	ZNF99	19	22940838	1873	G	A	625	E	K	possibly damaging	DOID:4159 / skin cancer/HERVW	-	4673	GE	HERVW9	NM_001080409/-/['ICGC', 'TCGA']
NonCanon	A8MXY4	ZNF99	19	22940841	1870	G	A	624	E	K	possibly damaging	DOID:4159 / skin cancer/HERVW	Gain|Phosphorylation	4673	GE	HERVW9	NM_001080409/-/['ICGC', 'TCGA']
NonCanon	A8MXY4	ZNF99	19	22940853	1858	C	G	620	P	A	probably damaging	DOID:263 / kidney cancer/HERVW	-	4673	GE	HERVW9	NM_001080409/-/['COSMIC']
NonCanon	A8MXY4	ZNF99	19	22940853	1858	C	G	620	P	A	probably damaging	DOID:1993 / rectum cancer/HERVW	-	4673	GE	HERVW9	NM_001080409/-/['ICGC']
NonCanon	A8MXY4	ZNF99	19	22940857	1854	G	T	618	K	N	possibly damaging	DOID:219 / colon cancer/HERVW	-	4673	GE	HERVW9	NM_001080409/-/['ICGC', 'TCGA']
NonCanon	A8MXY4	ZNF99	19	22940857	1854	G	T	618	K	N	possibly damaging	DOID:1521 / cecum cancer/HERVW	-	4673	GE	HERVW9	NM_001080409/-/['COSMIC']
NonCanon	A8MXY4	ZNF99	19	22940859	1852	A	G	618	K	E	benign	DOID:4362 / cervical cancer/HERVW	-	4673	GE	HERVW9	NM_001080409/-/['TCGA']
NonCanon	A8MXY4	ZNF99	19	22940864	1847	C	G	616	T	S	possibly damaging	DOID:4159 / skin cancer/HERVW	-	4673	GE	HERVW9	NM_001080409/22622578/['COSMIC']
NonCanon	A8MXY4	ZNF99	19	22940868	1843	C	T	615	H	Y	probably damaging	DOID:4159 / skin cancer/HERVW	Gain|Phosphorylation	4673	GE	HERVW9	NM_001080409/-/['ICGC', 'TCGA']
NonCanon	A8MXY4	ZNF99	19	22940877	1834	C	A	612	Q	K	benign	DOID:1324 / lung cancer/HERVW	-	4673	GE	HERVW9	NM_001080409/-/['COSMIC', 'IntOGen', 'ICGC', 'TCGA']
NonCanon	A8MXY4	ZNF99	19	22940885	1826	G	A	609	R	K	benign	DOID:4159 / skin cancer/HERVW	-	4673	GE	HERVW9	NM_001080409/-/['TCGA']
NonCanon	A8MXY4	ZNF99	19	22940885	1826	G	C	609	R	T	benign	DOID:1612 / breast cancer/HERVW	Gain|Phosphorylation	4673	GE	HERVW9	NM_001080409/22495314/['COSMIC']	NM_001080409/-/['IntOGen']
NonCanon	A8MXY4	ZNF99	19	22940896	1815	C	A	605	F	L	benign	DOID:363 / uterine cancer/HERVW	-	4673	GE	HERVW9	NM_001080409/-/['COSMIC', 'TCGA']
NonCanon	A8MXY4	ZNF99	19	22940896	1815	C	A	605	F	L	benign	DOID:1993 / rectum cancer/HERVW	-	4673	GE	HERVW9	NM_001080409/-/['COSMIC', 'ICGC', 'TCGA']
NonCanon	A8MXY4	ZNF99	19	22940904	1807	A	G	603	N	D	benign	DOID:4159 / skin cancer/HERVW	Gain|Phosphorylation	4673	GE	HERVW9	NM_001080409/-/['TCGA']
NonCanon	A8MXY4	ZNF99	19	22940907	1804	T	A	602	F	I	probably damaging	DOID:1319 / brain cancer/HERVW	-	4673	GE	HERVW9	NM_001080409/22832583/['COSMIC']	NM_001080409/-/['IntOGen', 'ICGC']
NonCanon	A8MXY4	ZNF99	19	22940936	1775	C	T	592	P	L	probably damaging	DOID:5041 / esophageal cancer/HERVW	-	4673	GE	HERVW9	NM_001080409/-/['ICGC']
NonCanon	A8MXY4	ZNF99	19	22940942	1769	A	G	590	E	G	possibly damaging	DOID:10534 / stomach cancer/HERVW	Gain|Phosphorylation	4673	GE	HERVW9	NM_001080409/-/['ICGC', 'TCGA']
NonCanon	A8MXY4	ZNF99	19	22940945	1766	G	C	589	G	A	possibly damaging	DOID:1324 / lung cancer/HERVW	Gain|Phosphorylation	4673	GE	HERVW9	NM_001080409/-/['COSMIC']
NonCanon	A8MXY4	ZNF99	19	22940969	1742	C	T	581	T	I	possibly damaging	DOID:5041 / esophageal cancer/HERVW	-	4673	GE	HERVW9	NM_001080409/23525077/['COSMIC']
NonCanon	A8MXY4	ZNF99	19	22940973	1738	C	A	580	L	I	probably damaging	DOID:1793 / pancreatic cancer/HERVW	-	4673	GE	HERVW9	NM_001080409/24293293/['COSMIC']
NonCanon	A8MXY4	ZNF99	19	22940978	1733	C	T	578	S	L	probably damaging	DOID:4159 / skin cancer/HERVW	-	4673	GE	HERVW9	NM_001080409/-/['ICGC', 'TCGA']
NonCanon	A8MXY4	ZNF99	19	22940978	1733	C	T	578	S	L	probably damaging	DOID:11054 / urinary bladder cancer/HERVW	-	4673	GE	HERVW9	NM_001080409/-/['COSMIC', 'IntOGen', 'ICGC', 'TCGA']
NonCanon	A8MXY4	ZNF99	19	22940986	1725	G	T	575	K	N	benign	DOID:1993 / rectum cancer/HERVW	Gain|Glycosylation	4673	GE	HERVW9	NM_001080409/22810696/['COSMIC']
NonCanon	A8MXY4	ZNF99	19	22940990	1721	T	G	574	F	C	probably damaging	DOID:1793 / pancreatic cancer/HERVW	Gain|Phosphorylation	4673	GE	HERVW9	NM_001080409/-/['TCGA']
NonCanon	A8MXY4	ZNF99	19	22941000	1711	G	T	571	G	C	probably damaging	DOID:1324 / lung cancer/HERVW	-	4673	GE	HERVW9	NM_001080409/-/['COSMIC', 'ICGC']
NonCanon	A8MXY4	ZNF99	19	22941000	1711	G	T	571	G	C	probably damaging	DOID:5041 / esophageal cancer/HERVW	-	4673	GE	HERVW9	NM_001080409/23525077/['COSMIC']
NonCanon	A8MXY4	ZNF99	19	22941030	1681	G	T	561	G	W	probably damaging	DOID:1324 / lung cancer/HERVW	-	4673	GE	HERVW9	NM_001080409/22980975/['COSMIC']
NonCanon	A8MXY4	ZNF99	19	22941044	1667	A	T	556	K	M	probably damaging	DOID:10534 / stomach cancer/HERVW	-	4673	GE	HERVW9	NM_001080409/-/['ICGC', 'TCGA']
NonCanon	A8MXY4	ZNF99	19	22941049	1662	A	C	554	K	N	probably damaging	DOID:219 / colon cancer/HERVW	-	4673	GE	HERVW9	NM_001080409/-/['COSMIC']
NonCanon	A8MXY4	ZNF99	19	22941052	1659	G	A	553	M	I	benign	DOID:4159 / skin cancer/HERVW	Gain|Glycosylation	4673	GE	HERVW9	NM_001080409/-/['ICGC', 'TCGA']
NonCanon	A8MXY4	ZNF99	19	22941056	1655	T	A	552	L	H	probably damaging	DOID:5041 / esophageal cancer/HERVW	Gain|Glycosylation	4673	GE	HERVW9	NM_001080409/23525077/['COSMIC']
NonCanon	A8MXY4	ZNF99	19	22941060	1651	A	G	551	T	A	benign	DOID:4159 / skin cancer/HERVW	-	4673	GE	HERVW9	NM_001080409/-/['ICGC', 'TCGA']
NonCanon	A8MXY4	ZNF99	19	22941062	1649	C	T	550	S	L	probably damaging	DOID:4362 / cervical cancer/HERVW	Gain|Phosphorylation	4673	GE	HERVW9	NM_001080409/-/['TCGA']
NonCanon	A8MXY4	ZNF99	19	22941065	1646	C	T	549	S	F	benign	DOID:4159 / skin cancer/HERVW	-	4673	GE	HERVW9	NM_001080409/-/['ICGC', 'TCGA']
NonCanon	A8MXY4	ZNF99	19	22941065	1646	C	A	549	S	Y	possibly damaging	DOID:11054 / urinary bladder cancer/HERVW	-	4673	GE	HERVW9	NM_001080409/-/['COSMIC', 'IntOGen']
NonCanon	A8MXY4	ZNF99	19	22941071	1640	A	G	547	N	S	benign	DOID:10534 / stomach cancer/HERVW	Gain|Phosphorylation	4673	GE	HERVW9	NM_001080409/-/['COSMIC']
NonCanon	A8MXY4	ZNF99	19	22941081	1630	A	T	544	K	X	-	DOID:263 / kidney cancer/HERVW	-	4673	GE	HERVW9	NM_001080409/-/['COSMIC']
NonCanon	A8MXY4	ZNF99	19	22941081	1630	A	T	544	K	X	-	DOID:1993 / rectum cancer/HERVW	-	4673	GE	HERVW9	NM_001080409/-/['ICGC']
NonCanon	A8MXY4	ZNF99	19	22941084	1627	G	A	543	G	S	possibly damaging	DOID:4159 / skin cancer/HERVW	Gain|Phosphorylation	4673	GE	HERVW9	NM_001080409/-/['ICGC', 'TCGA']
NonCanon	A8MXY4	ZNF99	19	22941086	1625	G	A	542	C	Y	probably damaging	DOID:5041 / esophageal cancer/HERVW	Gain|Phosphorylation	4673	GE	HERVW9	NM_001080409/-/['ICGC']
NonCanon	A8MXY4	ZNF99	19	22941093	1618	G	A	540	E	K	possibly damaging	DOID:5041 / esophageal cancer/HERVW	-	4673	GE	HERVW9	NM_001080409/23525077/['COSMIC']
NonCanon	A8MXY4	ZNF99	19	22941093	1618	G	A	540	E	K	possibly damaging	DOID:1909 / melanoma/HERVW	-	4673	GE	HERVW9	NM_001080409/22622578/['COSMIC']
NonCanon	A8MXY4	ZNF99	19	22941101	1610	A	G	537	Y	C	possibly damaging	DOID:1319 / brain cancer/HERVW	-	4673	GE	HERVW9	NM_001080409/-/['ICGC', 'TCGA']
NonCanon	A8MXY4	ZNF99	19	22941105	1606	C	T	536	P	S	probably damaging	DOID:4159 / skin cancer/HERVW	-	4673	GE	HERVW9	NM_001080409/-/['ICGC', 'TCGA']
NonCanon	A8MXY4	ZNF99	19	22941111	1600	A	G	534	K	E	benign	DOID:1324 / lung cancer/HERVW	-	4673	GE	HERVW9	NM_001080409/22980975/['COSMIC']
NonCanon	A8MXY4	ZNF99	19	22941111	1600	A	G	534	K	E	benign	DOID:10534 / stomach cancer/HERVW	-	4673	GE	HERVW9	NM_001080409/-/['COSMIC']
NonCanon	A8MXY4	ZNF99	19	22941111	1600	A	G	534	K	E	benign	DOID:10283 / prostate cancer/HERVW	-	4673	GE	HERVW9	NM_001080409/-/['ICGC']
NonCanon	A8MXY4	ZNF99	19	22941111	1600	A	G	534	K	E	benign	DOID:4362 / cervical cancer/HERVW	-	4673	GE	HERVW9	NM_001080409/-/['COSMIC', 'TCGA']
NonCanon	A8MXY4	ZNF99	19	22941120	1591	C	T	531	H	Y	probably damaging	DOID:4159 / skin cancer/HERVW	-	4673	GE	HERVW9	NM_001080409/-/['ICGC', 'TCGA']
NonCanon	A8MXY4	ZNF99	19	22941120	1591	C	T	531	H	Y	probably damaging	DOID:11054 / urinary bladder cancer/HERVW	-	4673	GE	HERVW9	NM_001080409/-/['COSMIC', 'IntOGen', 'ICGC', 'TCGA']
NonCanon	A8MXY4	ZNF99	19	22941129	1582	A	C	528	K	Q	probably damaging	DOID:1793 / pancreatic cancer/HERVW	-	4673	GE	HERVW9	NM_001080409/-/['TCGA']
NonCanon	A8MXY4	ZNF99	19	22941129	1582	A	C	528	K	Q	probably damaging	DOID:1319 / brain cancer/HERVW	-	4673	GE	HERVW9	NM_001080409/-/['IntOGen', 'COSMIC']
NonCanon	A8MXY4	ZNF99	19	22941129	1582	A	C	528	K	Q	probably damaging	DOID:263 / kidney cancer/HERVW	-	4673	GE	HERVW9	NM_001080409/-/['COSMIC', 'ICGC', 'TCGA', 'TCGA']
NonCanon	A8MXY4	ZNF99	19	22941129	1582	A	C	528	K	Q	probably damaging	DOID:3070 / malignant glioma/HERVW	-	4673	GE	HERVW9	NM_001080409/-/['ICGC', 'TCGA']
NonCanon	A8MXY4	ZNF99	19	22941129	1582	A	G	528	K	E	possibly damaging	DOID:1612 / breast cancer/HERVW	-	4673	GE	HERVW9	NM_001080409/-/['COSMIC', 'ICGC', 'TCGA']
NonCanon	A8MXY4	ZNF99	19	22941129	1582	A	G	528	K	E	possibly damaging	DOID:1909 / melanoma/HERVW	-	4673	GE	HERVW9	NM_001080409/24265154/['COSMIC']
NonCanon	A8MXY4	ZNF99	19	22941130	1581	T	A	527	H	Q	probably damaging	DOID:4159 / skin cancer/HERVW	-	4673	GE	HERVW9	NM_001080409/-/['ICGC', 'TCGA']
NonCanon	A8MXY4	ZNF99	19	22941130	1581	T	A	527	H	Q	probably damaging	DOID:1324 / lung cancer/HERVW	-	4673	GE	HERVW9	NM_001080409/-/['COSMIC', 'IntOGen', 'ICGC', 'TCGA']
NonCanon	A8MXY4	ZNF99	19	22941143	1568	C	A	523	A	D	benign	DOID:219 / colon cancer/HERVW	-	4673	GE	HERVW9	NM_001080409/-/['COSMIC']
NonCanon	A8MXY4	ZNF99	19	22941146	1565	C	T	522	S	L	possibly damaging	DOID:4159 / skin cancer/HERVW	-	4673	GE	HERVW9	NM_001080409/-/['ICGC', 'TCGA']
NonCanon	A8MXY4	ZNF99	19	22941154	1557	G	C	519	K	N	benign	DOID:10283 / prostate cancer/HERVW	-	4673	GE	HERVW9	NM_001080409/-/['TCGA']
NonCanon	A8MXY4	ZNF99	19	22941154	1557	G	C	519	K	N	benign	DOID:1319 / brain cancer/HERVW	-	4673	GE	HERVW9	NM_001080409/-/['IntOGen', 'COSMIC']
NonCanon	A8MXY4	ZNF99	19	22941154	1557	G	C	519	K	N	benign	DOID:263 / kidney cancer/HERVW	-	4673	GE	HERVW9	NM_001080409/-/['COSMIC', 'ICGC', 'TCGA']
NonCanon	A8MXY4	ZNF99	19	22941154	1557	G	C	519	K	N	benign	DOID:3070 / malignant glioma/HERVW	-	4673	GE	HERVW9	NM_001080409/-/['ICGC', 'TCGA']
NonCanon	A8MXY4	ZNF99	19	22941170	1541	G	A	514	C	Y	probably damaging	DOID:3571 / liver cancer/HERVW	-	4673	GE	HERVW9	NM_001080409/-/['ICGC', 'COSMIC']
NonCanon	A8MXY4	ZNF99	19	22941177	1534	G	C	512	E	Q	possibly damaging	DOID:1324 / lung cancer/HERVW	-	4673	GE	HERVW9	NM_001080409/-/['COSMIC', 'IntOGen', 'ICGC', 'TCGA']
NonCanon	A8MXY4	ZNF99	19	22941184	1527	C	A	509	C	X	-	DOID:1324 / lung cancer/HERVW	-	4673	GE	HERVW9	NM_001080409/22980975/['COSMIC']
NonCanon	A8MXY4	ZNF99	19	22941185	1526	G	T	509	C	F	benign	DOID:1324 / lung cancer/HERVW	-	4673	GE	HERVW9	NM_001080409/-/['IntOGen']
NonCanon	A8MXY4	ZNF99	19	22941189	1522	C	A	508	P	T	probably damaging	DOID:11934 / head and neck cancer/HERVW	Gain|Phosphorylation	4673	GE	HERVW9	NM_001080409/-/['TCGA']
NonCanon	A8MXY4	ZNF99	19	22941189	1522	C	A	508	P	T	probably damaging	DOID:0060119 / pharynx cancer/HERVW	Gain|Phosphorylation	4673	GE	HERVW9	NM_001080409/-/['IntOGen']
NonCanon	A8MXY4	ZNF99	19	22941191	1520	A	T	507	K	I	possibly damaging	DOID:219 / colon cancer/HERVW	-	4673	GE	HERVW9	NM_001080409/-/['COSMIC', 'ICGC', 'TCGA']
NonCanon	A8MXY4	ZNF99	19	22941195	1516	G	A	506	E	K	possibly damaging	DOID:4159 / skin cancer/HERVW	-	4673	GE	HERVW9	NM_001080409/-/['ICGC', 'TCGA']
NonCanon	A8MXY4	ZNF99	19	22941198	1513	G	A	505	E	K	benign	DOID:4159 / skin cancer/HERVW	-	4673	GE	HERVW9	NM_001080409/-/['ICGC', 'TCGA']
NonCanon	A8MXY4	ZNF99	19	22941211	1500	G	T	500	K	N	possibly damaging	DOID:219 / colon cancer/HERVW	Gain|Phosphorylation	4673	GE	HERVW9	NM_001080409/22895193/['COSMIC']
NonCanon	A8MXY4	ZNF99	19	22941219	1492	G	T	498	V	L	benign	DOID:1324 / lung cancer/HERVW	-	4673	GE	HERVW9	NM_001080409/-/['COSMIC', 'ICGC']
NonCanon	A8MXY4	ZNF99	19	22941224	1487	T	C	496	L	P	probably damaging	DOID:10534 / stomach cancer/HERVW	-	4673	GE	HERVW9	NM_001080409/-/['ICGC', 'TCGA']
NonCanon	A8MXY4	ZNF99	19	22941234	1477	T	C	493	S	P	benign	DOID:219 / colon cancer/HERVW	-	4673	GE	HERVW9	NM_001080409/22895193/['COSMIC']
NonCanon	A8MXY4	ZNF99	19	22941246	1465	G	T	489	A	S	probably damaging	DOID:2394 / ovarian cancer/HERVW	-	4673	GE	HERVW9	NM_001080409/-/['IntOGen']	NM_001080409/21720365/['COSMIC']
NonCanon	A8MXY4	ZNF99	19	22941252	1459	G	A	487	G	S	probably damaging	DOID:1612 / breast cancer/HERVW	Gain|Phosphorylation	4673	GE	HERVW9	NM_001080409/-/['COSMIC', 'IntOGen', 'ICGC', 'TCGA']
NonCanon	A8MXY4	ZNF99	19	22941261	1450	G	A	484	E	K	possibly damaging	DOID:4159 / skin cancer/HERVW	Gain|Phosphorylation	4673	GE	HERVW9	NM_001080409/-/['ICGC', 'TCGA']
NonCanon	A8MXY4	ZNF99	19	22941272	1439	C	T	480	P	L	benign	DOID:4159 / skin cancer/HERVW	-	4673	GE	HERVW9	NM_001080409/22622578/['COSMIC']
NonCanon	A8MXY4	ZNF99	19	22941275	1436	A	G	479	K	R	possibly damaging	DOID:10283 / prostate cancer/HERVW	-	4673	GE	HERVW9	NM_001080409/-/['ICGC', 'TCGA']
NonCanon	A8MXY4	ZNF99	19	22941279	1432	G	C	478	E	Q	probably damaging	DOID:1793 / pancreatic cancer/HERVW	-	4673	GE	HERVW9	NM_001080409/-/['TCGA']
NonCanon	A8MXY4	ZNF99	19	22941279	1432	G	C	478	E	Q	probably damaging	DOID:10283 / prostate cancer/HERVW	-	4673	GE	HERVW9	NM_001080409/-/['COSMIC']
NonCanon	A8MXY4	ZNF99	19	22941286	1425	T	A	475	H	Q	probably damaging	DOID:10283 / prostate cancer/HERVW	-	4673	GE	HERVW9	NM_001080409/22722839/['COSMIC']
NonCanon	A8MXY4	ZNF99	19	22941292	1419	A	G	473	I	M	possibly damaging	DOID:10283 / prostate cancer/HERVW	-	4673	GE	HERVW9	NM_001080409/22610119/['COSMIC']
NonCanon	A8MXY4	ZNF99	19	22941304	1407	A	C	469	R	S	benign	DOID:4159 / skin cancer/HERVW	Gain|Glycosylation	4673	GE	HERVW9	NM_001080409/-/['ICGC', 'TCGA']
NonCanon	A8MXY4	ZNF99	19	22941314	1397	C	T	466	S	L	possibly damaging	DOID:11054 / urinary bladder cancer/HERVW	-	4673	GE	HERVW9	NM_001080409/-/['IntOGen', 'ICGC', 'TCGA', 'COSMIC']
NonCanon	A8MXY4	ZNF99	19	22941316	1395	T	G	465	F	L	benign	DOID:1793 / pancreatic cancer/HERVW	Gain|Glycosylation	4673	GE	HERVW9	NM_001080409/-/['TCGA']
NonCanon	A8MXY4	ZNF99	19	22941316	1395	T	G	465	F	L	benign	DOID:4362 / cervical cancer/HERVW	Gain|Glycosylation	4673	GE	HERVW9	NM_001080409/-/['COSMIC', 'TCGA']
NonCanon	A8MXY4	ZNF99	19	22941329	1382	C	T	461	A	V	probably damaging	DOID:363 / uterine cancer/HERVW	-	4673	GE	HERVW9	NM_001080409/-/['COSMIC', 'TCGA']
NonCanon	A8MXY4	ZNF99	19	22941329	1382	C	A	461	A	D	probably damaging	DOID:1192 / peripheral nervous system neoplasm/HERVW	-	4673	GE	HERVW9	NM_001080409/23334666/['COSMIC']
NonCanon	A8MXY4	ZNF99	19	22941336	1375	A	G	459	S	G	benign	DOID:1793 / pancreatic cancer/HERVW	-	4673	GE	HERVW9	NM_001080409/-/['TCGA']
NonCanon	A8MXY4	ZNF99	19	22941336	1375	A	G	459	S	G	benign	DOID:4362 / cervical cancer/HERVW	-	4673	GE	HERVW9	NM_001080409/-/['TCGA']
NonCanon	A8MXY4	ZNF99	19	22941338	1373	G	A	458	C	Y	probably damaging	DOID:1324 / lung cancer/HERVW	Gain|Phosphorylation	4673	GE	HERVW9	NM_001080409/-/['COSMIC', 'IntOGen', 'ICGC', 'TCGA']
NonCanon	A8MXY4	ZNF99	19	22941342	1369	G	T	457	E	X	-	DOID:1993 / rectum cancer/HERVW	-	4673	GE	HERVW9	NM_001080409/22810696/['COSMIC']
NonCanon	A8MXY4	ZNF99	19	22941345	1366	G	A	456	E	K	benign	DOID:4159 / skin cancer/HERVW	-	4673	GE	HERVW9	NM_001080409/-/['ICGC', 'TCGA']
NonCanon	A8MXY4	ZNF99	19	22941352	1359	C	A	453	Y	X	-	DOID:219 / colon cancer/HERVW	-	4673	GE	HERVW9	NM_001080409/-/['COSMIC', 'ICGC', 'TCGA']
NonCanon	A8MXY4	ZNF99	19	22941360	1351	C	T	451	Q	X	-	DOID:1324 / lung cancer/HERVW	-	4673	GE	HERVW9	NM_001080409/-/['COSMIC']
NonCanon	A8MXY4	ZNF99	19	22941365	1346	G	A	449	G	E	possibly damaging	DOID:4159 / skin cancer/HERVW	Gain|Phosphorylation	4673	GE	HERVW9	NM_001080409/-/['ICGC', 'TCGA']
NonCanon	A8MXY4	ZNF99	19	22941377	1334	T	C	445	I	T	possibly damaging	DOID:363 / uterine cancer/HERVW	Gain|Phosphorylation	4673	GE	HERVW9	NM_001080409/-/['COSMIC', 'TCGA']
NonCanon	A8MXY4	ZNF99	19	22941379	1332	G	T	444	K	N	possibly damaging	DOID:363 / uterine cancer/HERVW	Gain|Phosphorylation	4673	GE	HERVW9	NM_001080409/-/['TCGA', 'COSMIC']
NonCanon	A8MXY4	ZNF99	19	22941392	1319	T	C	440	L	P	probably damaging	DOID:219 / colon cancer/HERVW	-	4673	GE	HERVW9	NM_001080409/22895193/['COSMIC']
NonCanon	A8MXY4	ZNF99	19	22941396	1315	G	T	439	A	S	benign	DOID:1319 / brain cancer/HERVW	-	4673	GE	HERVW9	NM_001080409/-/['COSMIC', 'IntOGen']
NonCanon	A8MXY4	ZNF99	19	22941396	1315	G	T	439	A	S	benign	DOID:3070 / malignant glioma/HERVW	-	4673	GE	HERVW9	NM_001080409/-/['ICGC', 'TCGA']
NonCanon	A8MXY4	ZNF99	19	22941402	1309	T	G	437	F	V	benign	DOID:219 / colon cancer/HERVW	-	4673	GE	HERVW9	NM_001080409/22810696/['COSMIC']
NonCanon	A8MXY4	ZNF99	19	22941405	1306	C	T	436	R	C	probably damaging	DOID:1319 / brain cancer/HERVW	Gain|Phosphorylation	4673	GE	HERVW9	NM_001080409/-/['COSMIC', 'IntOGen']
NonCanon	A8MXY4	ZNF99	19	22941405	1306	C	T	436	R	C	probably damaging	DOID:3070 / malignant glioma/HERVW	Gain|Phosphorylation	4673	GE	HERVW9	NM_001080409/-/['ICGC', 'TCGA']
NonCanon	A8MXY4	ZNF99	19	22941413	1298	C	T	433	A	V	possibly damaging	DOID:4159 / skin cancer/HERVW	Gain|Phosphorylation	4673	GE	HERVW9	NM_001080409/-/['ICGC', 'TCGA']
NonCanon	A8MXY4	ZNF99	19	22941422	1289	G	A	430	C	Y	probably damaging	DOID:1324 / lung cancer/HERVW	Gain|Phosphorylation	4673	GE	HERVW9	NM_001080409/-/['COSMIC']
NonCanon	A8MXY4	ZNF99	19	22941426	1285	G	A	429	E	K	probably damaging	DOID:11934 / head and neck cancer/HERVW	-	4673	GE	HERVW9	NM_001080409/-/['TCGA']
NonCanon	A8MXY4	ZNF99	19	22941426	1285	G	A	429	E	K	probably damaging	DOID:0060119 / pharynx cancer/HERVW	-	4673	GE	HERVW9	NM_001080409/-/['IntOGen']
NonCanon	A8MXY4	ZNF99	19	22941431	1280	G	T	427	C	F	possibly damaging	DOID:11934 / head and neck cancer/HERVW	-	4673	GE	HERVW9	NM_001080409/-/['TCGA']
NonCanon	A8MXY4	ZNF99	19	22941431	1280	G	T	427	C	F	possibly damaging	DOID:0060119 / pharynx cancer/HERVW	-	4673	GE	HERVW9	NM_001080409/-/['IntOGen']
NonCanon	A8MXY4	ZNF99	19	22941436	1275	C	G	425	C	W	possibly damaging	DOID:1324 / lung cancer/HERVW	-	4673	GE	HERVW9	NM_001080409/-/['COSMIC', 'IntOGen', 'ICGC', 'TCGA']
NonCanon	A8MXY4	ZNF99	19	22941440	1271	C	T	424	P	L	probably damaging	DOID:4159 / skin cancer/HERVW	-	4673	GE	HERVW9	NM_001080409/-/['ICGC', 'TCGA']
NonCanon	A8MXY4	ZNF99	19	22941479	1232	A	C	411	K	T	benign	DOID:5041 / esophageal cancer/HERVW	Gain|Phosphorylation	4673	GE	HERVW9	NM_001080409/23525077/['COSMIC']
NonCanon	A8MXY4	ZNF99	19	22941497	1214	C	A	405	A	D	possibly damaging	DOID:1324 / lung cancer/HERVW	-	4673	GE	HERVW9	NM_001080409/22980975/['COSMIC']
NonCanon	A8MXY4	ZNF99	19	22941498	1213	G	A	405	A	T	possibly damaging	DOID:4159 / skin cancer/HERVW	Gain|Phosphorylation	4673	GE	HERVW9	NM_001080409/-/['ICGC', 'TCGA']
NonCanon	A8MXY4	ZNF99	19	22941513	1198	G	A	400	E	K	possibly damaging	DOID:4159 / skin cancer/HERVW	Gain|Phosphorylation	4673	GE	HERVW9	NM_001080409/-/['ICGC', 'TCGA']
NonCanon	A8MXY4	ZNF99	19	22941524	1187	C	T	396	P	L	probably damaging	DOID:219 / colon cancer/HERVW	-	4673	GE	HERVW9	NM_001080409/-/['IntOGen']
NonCanon	A8MXY4	ZNF99	19	22941524	1187	C	T	396	P	L	probably damaging	DOID:1993 / rectum cancer/HERVW	-	4673	GE	HERVW9	NM_001080409/22810696/['COSMIC']
NonCanon	A8MXY4	ZNF99	19	22941527	1184	A	C	395	K	T	probably damaging	DOID:1793 / pancreatic cancer/HERVW	Gain|Phosphorylation	4673	GE	HERVW9	NM_001080409/-/['TCGA']
NonCanon	A8MXY4	ZNF99	19	22941528	1183	A	C	395	K	Q	probably damaging	DOID:11934 / head and neck cancer/HERVW	-	4673	GE	HERVW9	NM_001080409/-/['TCGA']
NonCanon	A8MXY4	ZNF99	19	22941528	1183	A	C	395	K	Q	probably damaging	DOID:0060119 / pharynx cancer/HERVW	-	4673	GE	HERVW9	NM_001080409/-/['IntOGen']
NonCanon	A8MXY4	ZNF99	19	22941531	1180	C	T	394	Q	X	-	DOID:1612 / breast cancer/HERVW	-	4673	GE	HERVW9	NM_001080409/-/['COSMIC', 'IntOGen', 'ICGC', 'TCGA']
NonCanon	A8MXY4	ZNF99	19	22941534	1177	G	A	393	G	R	probably damaging	DOID:1324 / lung cancer/HERVW	-	4673	GE	HERVW9	NM_001080409/22980975/['COSMIC']
NonCanon	A8MXY4	ZNF99	19	22941540	1171	C	G	391	H	D	probably damaging	DOID:11934 / head and neck cancer/HERVW	-	4673	GE	HERVW9	NM_001080409/-/['TCGA']
NonCanon	A8MXY4	ZNF99	19	22941557	1154	G	T	385	R	I	benign	DOID:10283 / prostate cancer/HERVW	-	4673	GE	HERVW9	NM_001080409/22610119/['COSMIC']
NonCanon	A8MXY4	ZNF99	19	22941575	1136	G	C	379	S	T	benign	DOID:1324 / lung cancer/HERVW	-	4673	GE	HERVW9	NM_001080409/-/['COSMIC', 'IntOGen']
NonCanon	A8MXY4	ZNF99	19	22941577	1134	T	A	378	F	L	probably damaging	DOID:1324 / lung cancer/HERVW	-	4673	GE	HERVW9	NM_001080409/22980975/['COSMIC']
NonCanon	A8MXY4	ZNF99	19	22941588	1123	G	A	375	G	S	probably damaging	DOID:1319 / brain cancer/HERVW	-	4673	GE	HERVW9	NM_001080409/-/['COSMIC', 'IntOGen']
NonCanon	A8MXY4	ZNF99	19	22941588	1123	G	A	375	G	S	probably damaging	DOID:3070 / malignant glioma/HERVW	-	4673	GE	HERVW9	NM_001080409/-/['ICGC', 'TCGA']
NonCanon	A8MXY4	ZNF99	19	22941591	1120	T	A	374	C	S	probably damaging	DOID:10534 / stomach cancer/HERVW	Gain|Phosphorylation	4673	GE	HERVW9	NM_001080409/-/['COSMIC']
NonCanon	A8MXY4	ZNF99	19	22941591	1120	T	A	374	C	S	probably damaging	DOID:10283 / prostate cancer/HERVW	Gain|Phosphorylation	4673	GE	HERVW9	NM_001080409/-/['ICGC']
NonCanon	A8MXY4	ZNF99	19	22941594	1117	G	T	373	E	X	-	DOID:219 / colon cancer/HERVW	-	4673	GE	HERVW9	NM_001080409/22810696/['COSMIC']
NonCanon	A8MXY4	ZNF99	19	22941617	1094	A	G	365	E	G	benign	DOID:10534 / stomach cancer/HERVW	-	4673	GE	HERVW9	NM_001080409/-/['COSMIC']
NonCanon	A8MXY4	ZNF99	19	22941623	1088	A	T	363	H	L	probably damaging	DOID:1324 / lung cancer/HERVW	-	4673	GE	HERVW9	NM_001080409/-/['COSMIC', 'ICGC']
NonCanon	A8MXY4	ZNF99	19	22941624	1087	C	T	363	H	Y	possibly damaging	DOID:4159 / skin cancer/HERVW	Gain|Phosphorylation	4673	GE	HERVW9	NM_001080409/-/['TCGA']
NonCanon	A8MXY4	ZNF99	19	22941641	1070	G	T	357	R	I	benign	DOID:1993 / rectum cancer/HERVW	-	4673	GE	HERVW9	NM_001080409/-/['ICGC', 'TCGA', 'COSMIC']
NonCanon	A8MXY4	ZNF99	19	22941645	1066	C	T	356	L	F	probably damaging	DOID:4159 / skin cancer/HERVW	Gain|Phosphorylation	4673	GE	HERVW9	NM_001080409/-/['ICGC', 'TCGA']
NonCanon	A8MXY4	ZNF99	19	22941668	1043	A	C	348	K	T	probably damaging	DOID:1793 / pancreatic cancer/HERVW	-	4673	GE	HERVW9	NM_001080409/-/['TCGA']
NonCanon	A8MXY4	ZNF99	19	22941681	1030	G	A	344	E	K	probably damaging	DOID:4159 / skin cancer/HERVW	Gain|Phosphorylation	4673	GE	HERVW9	NM_001080409/-/['ICGC', 'TCGA']
NonCanon	A8MXY4	ZNF99	19	22941697	1014	G	C	338	K	N	benign	DOID:5041 / esophageal cancer/HERVW	-	4673	GE	HERVW9	NM_001080409/-/['ICGC']
NonCanon	A8MXY4	ZNF99	19	22941701	1010	G	A	337	G	E	benign	DOID:4159 / skin cancer/HERVW	Gain|Phosphorylation	4673	GE	HERVW9	NM_001080409/-/['ICGC', 'TCGA']
NonCanon	A8MXY4	ZNF99	19	22941701	1010	G	T	337	G	V	possibly damaging	DOID:11934 / head and neck cancer/HERVW	-	4673	GE	HERVW9	NM_001080409/-/['TCGA']
NonCanon	A8MXY4	ZNF99	19	22941702	1009	G	T	337	G	X	-	DOID:11934 / head and neck cancer/HERVW	-	4673	GE	HERVW9	NM_001080409/-/['TCGA']
NonCanon	O14843	FFAR3	19	35850820	1028	G	A	343	C	Y	benign	DOID:5041 / esophageal cancer/MER1	-	4711	Unclassifiable chains		NM_005304/-/['ICGC']
NonCanon	P04632	CAPNS1	19	36640737	803	C	T	268	S	F	probably damaging	DOID:4362 / cervical cancer/HERVH	-	4713	GE	HERVHF	NM_001749/-/['COSMIC', 'TCGA']	NM_001003962/-/['COSMIC', 'TCGA']
NonCanon	P24310	COX7A1	19	36641923	201	C	A	67	S	R	-	DOID:5041 / esophageal cancer/HERVH	-	4713	GE	HERVHF	NM_001864/23525077/['COSMIC']
NonCanon	P24310	COX7A1	19	36642380	171	G	A	57	M	I	probably damaging	DOID:11054 / urinary bladder cancer/HERVH	-	4713	GE	HERVHF	NM_001864/-/['ICGC', 'COSMIC', 'TCGA']
NonCanon	P24310	COX7A1	19	36642385	166	A	G	56	T	A	probably damaging	DOID:263 / kidney cancer/HERVH	Loss|Binding Site	4713	GE	HERVHF	NM_001864/-/['TCGA']
NonCanon	P24310	COX7A1	19	36642390	161	G	A	54	R	Q	-	DOID:219 / colon cancer/HERVH	-	4713	GE	HERVHF	NM_001864/22810696/['COSMIC']
NonCanon	P24310	COX7A1	19	36642409	142	G	A	48	V	I	benign	DOID:363 / uterine cancer/HERVH	-	4713	GE	HERVHF	NM_001864/-/['COSMIC', 'IntOGen', 'TCGA']
NonCanon	P24310	COX7A1	19	36642572	101	A	G	34	Q	R	benign	DOID:1612 / breast cancer/HERVH	Loss|Binding Site	4713	GE	HERVHF	NM_001864/-/['ICGC']
NonCanon	P24310	COX7A1	19	36642594	79	C	T	27	R	C	possibly damaging	DOID:363 / uterine cancer/HERVH	-	4713	GE	HERVHF	NM_001864/-/['IntOGen', 'TCGA', 'COSMIC']
NonCanon	P24310	COX7A1	19	36642647	26	C	A	9	A	E	possibly damaging	DOID:363 / uterine cancer/HERVH	Gain|Phosphorylation	4713	GE	HERVHF	NM_001864/-/['COSMIC', 'IntOGen', 'TCGA']
NonCanon	P24310	COX7A1	19	36643303	7	G	A	3	A	T	possibly damaging	DOID:3953 / adrenal gland cancer/HERVH	-	4713	GE	HERVHF	NM_001864/-/['TCGA']
NonCanon	Q13011	ECH1	19	39321725	342	C	A	114	F	L	probably damaging	DOID:1793 / pancreatic cancer/HERV9	-	4720	GE	HERVW9	NM_001398/-/['TCGA']
NonCanon	Q13011	ECH1	19	39321782	285	G	C	95	K	N	probably damaging	DOID:11934 / head and neck cancer/HERV9	Gain|Glycosylation	4720	GE	HERVW9	NM_001398/-/['TCGA']
NonCanon	Q13011	ECH1	19	39321980	229	A	G	77	K	E	probably damaging	DOID:263 / kidney cancer/HERV9	-	4720	GE	HERVW9	NM_001398/-/['IntOGen', 'ICGC', 'TCGA', 'COSMIC']
NonCanon	Q13011	ECH1	19	39322033	176	G	A	59	R	H	probably damaging	DOID:219 / colon cancer/HERV9	-	4720	GE	HERVW9	NM_001398/22895193/['COSMIC']
NonCanon	Q13011	ECH1	19	39322049	160	A	T	54	S	C	probably damaging	DOID:11934 / head and neck cancer/HERV9	-	4720	GE	HERVW9	NM_001398/-/['TCGA']
NonCanon	Q13011	ECH1	19	39322049	160	A	T	54	S	C	probably damaging	DOID:0060119 / pharynx cancer/HERV9	-	4720	GE	HERVW9	NM_001398/-/['IntOGen']
NonCanon	Q13011	ECH1	19	39322054	155	A	G	52	D	G	benign	DOID:3571 / liver cancer/HERV9	-	4720	GE	HERVW9	NM_001398/-/['TCGA']
NonCanon	Q13011	ECH1	19	39322070	139	C	A	47	L	I	benign	DOID:10534 / stomach cancer/HERV9	-	4720	GE	HERVW9	NM_001398/-/['ICGC', 'TCGA']
NonCanon	Q13011	ECH1	19	39322081	128	C	T	43	S	F	probably damaging	DOID:4159 / skin cancer/HERV9	Gain|Phosphorylation	4720	GE	HERVW9	NM_001398/-/['ICGC', 'TCGA']
NonCanon	Q13011	ECH1	19	39322087	122	A	C	41	E	A	benign	DOID:1781 / thyroid cancer/HERV9	Gain|Phosphorylation	4720	GE	HERVW9	NM_001398/-/['ICGC', 'COSMIC']
NonCanon	Q13011	ECH1	19	39322127	82	A	G	28	S	G	benign	DOID:2394 / ovarian cancer/HERV9	Loss|Phosphorylation	4720	GE	HERVW9	NM_001398/-/['IntOGen']	NM_001398/21720365/['COSMIC']
NonCanon	Q13011	ECH1	19	39322373	40	C	G	14	L	V	probably damaging	DOID:2394 / ovarian cancer/HERV9	-	4720	GE	HERVW9	NM_001398/-/['COSMIC', 'ICGC']
NonCanon	Q13011	ECH1	19	39322403	10	G	T	4	G	W	possibly damaging	DOID:263 / kidney cancer/HERV9	-	4720	GE	HERVW9	NM_001398/-/['TCGA']
NonCanon	P14866	HNRNPL	19	39327370	1363	G	A	455	A	T	possibly damaging	DOID:363 / uterine cancer/HERV9	-	4720	GE	HERVW9	NM_001005335/-/['COSMIC', 'TCGA']
NonCanon	P14866	HNRNPL	19	39327370	1762	G	A	588	A	T	possibly damaging	DOID:363 / uterine cancer/HERV9	Gain|Phosphorylation	4720	GE	HERVW9	NM_001533/-/['COSMIC', 'TCGA']
NonCanon	P14866	HNRNPL	19	39327374	1758	G	T	586	Q	H	benign	DOID:11934 / head and neck cancer/HERV9	-	4720	GE	HERVW9	NM_001533/-/['TCGA']
NonCanon	P14866	HNRNPL	19	39327374	1359	G	T	453	Q	H	benign	DOID:11934 / head and neck cancer/HERV9	-	4720	GE	HERVW9	NM_001005335/-/['TCGA']
NonCanon	P14866	HNRNPL	19	39327374	1758	G	T	586	Q	H	benign	DOID:0060119 / pharynx cancer/HERV9	-	4720	GE	HERVW9	NM_001533/-/['IntOGen']
NonCanon	P14866	HNRNPL	19	39327374	1359	G	T	453	Q	H	benign	DOID:0060119 / pharynx cancer/HERV9	-	4720	GE	HERVW9	NM_001005335/-/['IntOGen']
NonCanon	P14866	HNRNPL	19	39327415	1318	C	A	440	P	T	possibly damaging	DOID:363 / uterine cancer/HERV9	-	4720	GE	HERVW9	NM_001005335/-/['TCGA', 'COSMIC']
NonCanon	P14866	HNRNPL	19	39327415	1717	C	A	573	P	T	possibly damaging	DOID:363 / uterine cancer/HERV9	Gain|Glycosylation	4720	GE	HERVW9	NM_001533/-/['TCGA', 'COSMIC']
NonCanon	P14866	HNRNPL	19	39328048	1687	A	T	563	N	Y	probably damaging	DOID:4159 / skin cancer/HERV9	-	4720	GE	HERVW9	NM_001533/-/['TCGA']
NonCanon	P14866	HNRNPL	19	39328048	1288	A	T	430	N	Y	probably damaging	DOID:4159 / skin cancer/HERV9	-	4720	GE	HERVW9	NM_001005335/-/['TCGA']
NonCanon	P14866	HNRNPL	19	39328054	1681	T	A	561	F	I	possibly damaging	DOID:1324 / lung cancer/HERV9	-	4720	GE	HERVW9	NM_001533/-/['COSMIC']
NonCanon	P14866	HNRNPL	19	39328054	1282	T	A	428	F	I	possibly damaging	DOID:1324 / lung cancer/HERV9	-	4720	GE	HERVW9	NM_001005335/-/['COSMIC']
NonCanon	P14866	HNRNPL	19	39328060	1276	C	G	426	L	V	probably damaging	DOID:3571 / liver cancer/HERV9	-	4720	GE	HERVW9	NM_001005335/-/['TCGA']
NonCanon	P14866	HNRNPL	19	39328060	1675	C	G	559	L	V	probably damaging	DOID:3571 / liver cancer/HERV9	-	4720	GE	HERVW9	NM_001533/-/['TCGA']
NonCanon	P43626	KIR2DL1	19	55281304	2	T	C	1	M	T	probably damaging	DOID:1521 / cecum cancer/MST	-	4780	S		NM_014218/-/['COSMIC']
NonCanon	P43626	KIR2DL1	19	55281307	5	C	T	2	S	L	benign	DOID:4159 / skin cancer/MST	-	4780	S		NM_014218/-/['ICGC', 'TCGA']
NonCanon	P43626	KIR2DL1	19	55281312	10	T	A	4	L	M	benign	DOID:3571 / liver cancer/MST	-	4780	S		NM_014218/-/['COSMIC']
NonCanon	P43626	KIR2DL1	19	55281315	13	G	T	5	V	F	possibly damaging	DOID:1781 / thyroid cancer/MST	-	4780	S		NM_014218/-/['ICGC', 'COSMIC']
NonCanon	P43626	KIR2DL1	19	55281315	13	G	T	5	V	F	possibly damaging	DOID:219 / colon cancer/MST	-	4780	S		NM_014218/-/['COSMIC', 'ICGC', 'TCGA']
NonCanon	P43626	KIR2DL1	19	55281315	13	G	T	5	V	F	possibly damaging	DOID:1793 / pancreatic cancer/MST	-	4780	S		NM_014218/-/['TCGA']
NonCanon	P43626	KIR2DL1	19	55281315	13	G	T	5	V	F	possibly damaging	DOID:1612 / breast cancer/MST	-	4780	S		NM_014218/-/['COSMIC']
NonCanon	P43626	KIR2DL1	19	55281318	16	G	A	6	V	I	benign	DOID:5041 / esophageal cancer/MST	-	4780	S		NM_014218/23525077/['COSMIC']
NonCanon	P43626	KIR2DL1	19	55282321	55	G	T	19	A	S	benign	DOID:1324 / lung cancer/MST	-	4780	S		NM_014218/-/['IntOGen', 'COSMIC']
NonCanon	P43626	KIR2DL1	19	55282321	55	G	A	19	A	T	benign	DOID:1793 / pancreatic cancer/MST	-	4780	S		NM_014218/-/['TCGA']
NonCanon	P43626	KIR2DL1	19	55282328	62	C	A	21	P	Q	probably damaging	DOID:5041 / esophageal cancer/MST	-	4780	S		NM_014218/23525077/['COSMIC']
NonCanon	P43626	KIR2DL1	19	55282330	64	C	A	22	H	N	possibly damaging	DOID:1324 / lung cancer/MST	Gain|Phosphorylation	4780	S		NM_014218/-/['IntOGen']
NonCanon	P43626	KIR2DL1	19	55284787	73	G	T	25	V	F	benign	DOID:1781 / thyroid cancer/MST	-	4780	S		NM_014218/-/['COSMIC', 'ICGC']
NonCanon	P43626	KIR2DL1	19	55284790	76	C	T	26	H	Y	benign	DOID:4159 / skin cancer/MST	-	4780	S		NM_014218/-/['ICGC', 'TCGA']
NonCanon	P43626	KIR2DL1	19	55284791	77	A	G	26	H	R	benign	DOID:1781 / thyroid cancer/MST	-	4780	S		NM_014218/-/['COSMIC', 'ICGC']
NonCanon	P43626	KIR2DL1	19	55284791	77	A	G	26	H	R	benign	DOID:3571 / liver cancer/MST	-	4780	S		NM_014218/-/['ICGC', 'COSMIC']
NonCanon	P43626	KIR2DL1	19	55284794	80	G	A	27	R	K	benign	DOID:4159 / skin cancer/MST	-	4780	S		NM_014218/-/['ICGC', 'TCGA']
NonCanon	P43626	KIR2DL1	19	55284800	86	C	T	29	P	L	probably damaging	DOID:4159 / skin cancer/MST	-	4780	S		NM_014218/-/['ICGC', 'TCGA']
NonCanon	P43626	KIR2DL1	19	55284809	95	T	C	32	L	P	probably damaging	DOID:1324 / lung cancer/MST	-	4780	S		NM_014218/22980975/['COSMIC']
NonCanon	P43626	KIR2DL1	19	55284861	147	T	A	49	C	X	-	DOID:219 / colon cancer/MST	-	4780	S		NM_014218/-/['COSMIC']
NonCanon	P43626	KIR2DL1	19	55284899	185	G	A	62	R	K	possibly damaging	DOID:4159 / skin cancer/MST	-	4780	S		NM_014218/-/['ICGC', 'TCGA']
NonCanon	P43626	KIR2DL1	19	55284901	187	G	C	63	E	Q	possibly damaging	DOID:1612 / breast cancer/MST	-	4780	S		NM_014218/-/['COSMIC', 'ICGC', 'TCGA']
NonCanon	P43626	KIR2DL1	19	55284917	203	A	T	68	D	V	possibly damaging	DOID:10283 / prostate cancer/MST	Gain|Phosphorylation	4780	S		NM_014218/-/['TCGA']
NonCanon	P43626	KIR2DL1	19	55284920	206	C	A	69	T	N	possibly damaging	DOID:4159 / skin cancer/MST	Loss|+2 from N-linked Glycosylation	4780	S		NM_014218/-/['ICGC', 'TCGA']
NonCanon	P43626	KIR2DL1	19	55284925	211	C	T	71	R	C	benign	DOID:10534 / stomach cancer/MST	Loss|Binding Site	4780	S		NM_014218/-/['TCGA']
NonCanon	P43626	KIR2DL1	19	55284925	211	C	T	71	R	C	benign	DOID:1793 / pancreatic cancer/MST	Loss|Binding Site	4780	S		NM_014218/-/['TCGA']
NonCanon	P43626	KIR2DL1	19	55284926	212	G	A	71	R	H	benign	DOID:219 / colon cancer/MST	Loss|Binding Site	4780	S		NM_014218/-/['ICGC', 'TCGA']
NonCanon	P43626	KIR2DL1	19	55284926	212	G	A	71	R	H	benign	DOID:1521 / cecum cancer/MST	Loss|Binding Site	4780	S		NM_014218/-/['COSMIC']
NonCanon	P43626	KIR2DL1	19	55284926	212	G	A	71	R	H	benign	DOID:1612 / breast cancer/MST	Loss|Binding Site	4780	S		NM_014218/-/['COSMIC', 'IntOGen', 'ICGC', 'TCGA']
NonCanon	P43626	KIR2DL1	19	55284949	235	G	A	79	G	R	benign	DOID:3571 / liver cancer/MST	Gain|Phosphorylation	4780	S		NM_014218/-/['TCGA']
NonCanon	P43626	KIR2DL1	19	55284950	236	G	T	79	G	V	probably damaging	DOID:363 / uterine cancer/MST	Gain|Phosphorylation	4780	S		NM_014218/-/['COSMIC', 'TCGA']
NonCanon	P43626	KIR2DL1	19	55284956	242	C	T	81	S	F	benign	DOID:4159 / skin cancer/MST	-	4780	S		NM_014218/-/['TCGA']
NonCanon	P43626	KIR2DL1	19	55284967	253	T	G	85	F	V	probably damaging	DOID:10534 / stomach cancer/MST	Loss|+1 from N-linked Glycosylation	4780	S		NM_014218/-/['ICGC', 'TCGA']
NonCanon	P43626	KIR2DL1	19	55284976	262	A	G	88	S	G	benign	DOID:1781 / thyroid cancer/MST	-	4780	S		NM_014218/-/['COSMIC', 'ICGC']
NonCanon	P43626	KIR2DL1	19	55284979	265	C	T	89	R	C	possibly damaging	DOID:11934 / head and neck cancer/MST	-	4780	S		NM_014218/-/['TCGA']
NonCanon	P43626	KIR2DL1	19	55284980	266	G	A	89	R	H	benign	DOID:1319 / brain cancer/MST	Gain|Phosphorylation	4780	S		NM_014218/-/['IntOGen', 'COSMIC']
NonCanon	P43626	KIR2DL1	19	55284980	266	G	A	89	R	H	benign	DOID:3070 / malignant glioma/MST	Gain|Phosphorylation	4780	S		NM_014218/-/['ICGC', 'TCGA']
NonCanon	P43626	KIR2DL1	19	55284980	266	G	A	89	R	H	benign	DOID:10283 / prostate cancer/MST	Gain|Phosphorylation	4780	S		NM_014218/22610119/['COSMIC']
NonCanon	P43626	KIR2DL1	19	55284980	266	G	A	89	R	H	benign	DOID:1993 / rectum cancer/MST	Gain|Phosphorylation	4780	S		NM_014218/-/['COSMIC', 'ICGC', 'TCGA']
NonCanon	P43626	KIR2DL1	19	55284986	272	C	T	91	T	M	possibly damaging	DOID:1319 / brain cancer/MST	-	4780	S		NM_014218/-/['COSMIC', 'IntOGen']
NonCanon	P43626	KIR2DL1	19	55284986	272	C	T	91	T	M	possibly damaging	DOID:4362 / cervical cancer/MST	-	4780	S		NM_014218/-/['TCGA']
NonCanon	P43626	KIR2DL1	19	55284986	272	C	T	91	T	M	possibly damaging	DOID:3070 / malignant glioma/MST	-	4780	S		NM_014218/-/['ICGC', 'TCGA']
NonCanon	P43626	KIR2DL1	19	55285010	296	G	T	99	R	I	probably damaging	DOID:363 / uterine cancer/MST	Gain|Phosphorylation	4780	S		NM_014218/-/['TCGA', 'COSMIC']
NonCanon	P43626	KIR2DL1	19	55285010	296	G	T	99	R	I	probably damaging	DOID:1612 / breast cancer/MST	Gain|Phosphorylation	4780	S		NM_014218/22722201/['COSMIC']	NM_014218/-/['IntOGen', 'ICGC']
NonCanon	P43626	KIR2DL1	19	55285018	304	G	A	102	G	S	probably damaging	DOID:4159 / skin cancer/MST	Gain|Phosphorylation	4780	S		NM_014218/-/['ICGC', 'TCGA']
NonCanon	P43626	KIR2DL1	19	55285022	308	C	T	103	S	F	probably damaging	DOID:4159 / skin cancer/MST	Gain|Phosphorylation	4780	S		NM_014218/-/['ICGC', 'TCGA']
NonCanon	P43626	KIR2DL1	19	55285022	308	C	A	103	S	Y	probably damaging	DOID:1324 / lung cancer/MST	Gain|Phosphorylation	4780	S		NM_014218/22980975/['COSMIC']
NonCanon	P43626	KIR2DL1	19	55285022	308	C	A	103	S	Y	probably damaging	DOID:363 / uterine cancer/MST	Gain|Phosphorylation	4780	S		NM_014218/-/['COSMIC', 'TCGA']
NonCanon	P43626	KIR2DL1	19	55285024	310	G	C	104	V	L	benign	DOID:263 / kidney cancer/MST	Gain|Phosphorylation	4780	S		NM_014218/-/['TCGA']
NonCanon	P43626	KIR2DL1	19	55285027	313	A	C	105	T	P	benign	DOID:219 / colon cancer/MST	-	4780	S		NM_014218/-/['COSMIC']
NonCanon	P43626	KIR2DL1	19	55285036	322	C	T	108	P	S	benign	DOID:4159 / skin cancer/MST	-	4780	S		NM_014218/-/['ICGC', 'TCGA']
NonCanon	P43626	KIR2DL1	19	55285042	328	C	T	110	Q	X	-	DOID:1324 / lung cancer/MST	-	4780	S		NM_014218/-/['COSMIC', 'IntOGen', 'ICGC', 'TCGA']
NonCanon	P43626	KIR2DL1	19	55285048	334	T	C	112	S	P	probably damaging	DOID:10534 / stomach cancer/MST	-	4780	S		NM_014218/-/['ICGC', 'TCGA']
NonCanon	P43626	KIR2DL1	19	55285048	334	T	A	112	S	T	probably damaging	DOID:1319 / brain cancer/MST	-	4780	S		NM_014218/-/['ICGC', 'TCGA']
NonCanon	P43626	KIR2DL1	19	55285049	335	C	G	112	S	X	-	DOID:5041 / esophageal cancer/MST	-	4780	S		NM_014218/-/['ICGC']
NonCanon	P43626	KIR2DL1	19	55285060	346	G	A	116	D	N	probably damaging	DOID:4159 / skin cancer/MST	Loss|Binding Site	4780	S		NM_014218/-/['TCGA']
NonCanon	P43626	KIR2DL1	19	55285069	355	G	A	119	D	N	benign	DOID:4159 / skin cancer/MST	-	4780	S		NM_014218/-/['ICGC', 'TCGA']
NonCanon	P43626	KIR2DL1	19	55285075	361	G	A	121	V	M	probably damaging	DOID:1319 / brain cancer/MST	-	4780	S		NM_014218/-/['TCGA']
NonCanon	P43626	KIR2DL1	19	55285082	368	T	A	123	I	K	benign	DOID:11934 / head and neck cancer/MST	Gain|Phosphorylation	4780	S		NM_014218/-/['TCGA']
NonCanon	P43626	KIR2DL1	19	55285082	368	T	A	123	I	K	benign	DOID:0060119 / pharynx cancer/MST	Gain|Phosphorylation	4780	S		NM_014218/-/['IntOGen']
NonCanon	P43626	KIR2DL1	19	55286648	402	G	T	134	Q	H	probably damaging	DOID:3953 / adrenal gland cancer/MST	Gain|Phosphorylation	4780	S		NM_014218/-/['TCGA']
NonCanon	P43626	KIR2DL1	19	55286677	431	A	G	144	N	S	benign	DOID:1781 / thyroid cancer/MST	Gain|Phosphorylation	4780	S		NM_014218/-/['COSMIC', 'ICGC']
NonCanon	P43626	KIR2DL1	19	55286721	475	C	T	159	H	Y	possibly damaging	DOID:11934 / head and neck cancer/MST	Gain|Phosphorylation	4780	S		NM_014218/-/['TCGA']
NonCanon	P43626	KIR2DL1	19	55286722	476	A	G	159	H	R	possibly damaging	DOID:2531 / hematologic cancer/MST	Gain|Phosphorylation	4780	S		NM_014218/21796119/['COSMIC']
NonCanon	P43626	KIR2DL1	19	55286728	482	C	T	161	S	F	probably damaging	DOID:4159 / skin cancer/MST	-	4780	S		NM_014218/-/['ICGC', 'TCGA']
NonCanon	P43626	KIR2DL1	19	55286731	485	G	C	162	R	T	possibly damaging	DOID:4159 / skin cancer/MST	Gain|Phosphorylation	4780	S		NM_014218/24838835/['COSMIC']
NonCanon	P43626	KIR2DL1	19	55286731	485	G	C	162	R	T	possibly damaging	DOID:1781 / thyroid cancer/MST	Gain|Phosphorylation	4780	S		NM_014218/-/['COSMIC', 'ICGC']
NonCanon	P43626	KIR2DL1	19	55286733	487	G	T	163	E	X	-	DOID:1324 / lung cancer/MST	-	4780	S		NM_014218/22980975/['COSMIC']
NonCanon	P43626	KIR2DL1	19	55286733	487	G	A	163	E	K	probably damaging	DOID:263 / kidney cancer/MST	-	4780	S		NM_014218/23797736/['COSMIC']
NonCanon	P43626	KIR2DL1	19	55286736	490	G	A	164	G	R	possibly damaging	DOID:4159 / skin cancer/MST	-	4780	S		NM_014218/-/['ICGC', 'TCGA']
NonCanon	P43626	KIR2DL1	19	55286739	493	G	A	165	E	K	possibly damaging	DOID:11054 / urinary bladder cancer/MST	-	4780	S		NM_014218/-/['IntOGen', 'ICGC', 'COSMIC', 'TCGA']
NonCanon	P43626	KIR2DL1	19	55286752	506	G	A	169	R	H	benign	DOID:1324 / lung cancer/MST	-	4780	S		NM_014218/-/['COSMIC', 'ICGC']
NonCanon	P43626	KIR2DL1	19	55286757	511	C	T	171	L	F	benign	DOID:1781 / thyroid cancer/MST	-	4780	S		NM_014218/-/['ICGC', 'COSMIC']
NonCanon	P43626	KIR2DL1	19	55286782	536	G	A	179	G	E	probably damaging	DOID:4159 / skin cancer/MST	Loss|+1 from N-linked Glycosylation	4780	S		NM_014218/-/['ICGC', 'TCGA']
NonCanon	P43626	KIR2DL1	19	55286802	556	C	T	186	P	S	benign	DOID:4159 / skin cancer/MST	-	4780	S		NM_014218/-/['ICGC', 'TCGA']
NonCanon	P43626	KIR2DL1	19	55286808	562	G	A	188	G	S	possibly damaging	DOID:4159 / skin cancer/MST	-	4780	S		NM_014218/-/['ICGC', 'TCGA']
NonCanon	P43626	KIR2DL1	19	55286809	563	G	A	188	G	D	possibly damaging	DOID:1781 / thyroid cancer/MST	-	4780	S		NM_014218/-/['COSMIC', 'ICGC']
NonCanon	P43626	KIR2DL1	19	55286820	574	C	A	192	H	N	possibly damaging	DOID:1781 / thyroid cancer/MST	-	4780	S		NM_014218/-/['ICGC', 'TCGA']
NonCanon	P43626	KIR2DL1	19	55286822	576	C	A	192	H	Q	benign	DOID:4362 / cervical cancer/MST	-	4780	S		NM_014218/-/['TCGA']
NonCanon	P43626	KIR2DL1	19	55286823	577	G	A	193	G	R	possibly damaging	DOID:10534 / stomach cancer/MST	Gain|Phosphorylation	4780	S		NM_014218/-/['ICGC', 'TCGA']
NonCanon	P43626	KIR2DL1	19	55286854	608	A	G	203	H	R	benign	DOID:1781 / thyroid cancer/MST	Gain|Phosphorylation	4780	S		NM_014218/-/['ICGC', 'COSMIC']
NonCanon	P43626	KIR2DL1	19	55286854	608	A	G	203	H	R	benign	DOID:1324 / lung cancer/MST	Gain|Phosphorylation	4780	S		NM_014218/22980975/['COSMIC']
NonCanon	P43626	KIR2DL1	19	55286856	610	G	C	204	D	H	benign	DOID:4159 / skin cancer/MST	Gain|Phosphorylation	4780	S		NM_014218/-/['ICGC', 'TCGA']
NonCanon	P43626	KIR2DL1	19	55286868	622	G	A	208	E	K	benign	DOID:4159 / skin cancer/MST	-	4780	S		NM_014218/-/['ICGC', 'TCGA']
NonCanon	P43626	KIR2DL1	19	55286871	625	T	A	209	W	R	probably damaging	DOID:2531 / hematologic cancer/MST	-	4780	S		NM_014218/-/['ICGC']
NonCanon	P43626	KIR2DL1	19	55286872	626	G	A	209	W	X	-	DOID:5041 / esophageal cancer/MST	-	4780	S		NM_014218/23525077/['COSMIC']
NonCanon	P43626	KIR2DL1	19	55286879	633	G	T	211	K	N	benign	DOID:11934 / head and neck cancer/MST	Gain|Glycosylation	4780	S		NM_014218/-/['TCGA']
NonCanon	P43626	KIR2DL1	19	55286879	633	G	T	211	K	N	benign	DOID:0060119 / pharynx cancer/MST	Gain|Glycosylation	4780	S		NM_014218/-/['IntOGen']
NonCanon	P43626	KIR2DL1	19	55290064	665	G	A	222	G	E	benign	DOID:4159 / skin cancer/MST	-	4780	S		NM_014218/-/['ICGC', 'TCGA']
NonCanon	P43626	KIR2DL1	19	55290069	670	C	A	224	P	T	benign	DOID:1324 / lung cancer/MST	Gain|Glycosylation	4780	S		NM_014218/-/['COSMIC', 'IntOGen', 'ICGC', 'TCGA']
NonCanon	P43626	KIR2DL1	19	55290079	680	G	T	227	S	I	possibly damaging	DOID:1324 / lung cancer/MST	Gain|Glycosylation	4780	S		NM_014218/-/['IntOGen']
NonCanon	P43626	KIR2DL1	19	55290088	689	C	T	230	S	L	possibly damaging	DOID:4159 / skin cancer/MST	-	4780	S		NM_014218/-/['ICGC', 'TCGA']
Canon	Q96HQ0	ZNF419	19	57999322	4	G	T	2	A	S	probably damaging	DOID:1324 / lung cancer/MER50	-	4790	GE	MER50like	NM_001291743/-/['IntOGen']	NM_001291743/22941188/['COSMIC']	NM_001098496/-/['IntOGen']	NM_001098491/22941188/['COSMIC']
Canon	Q96HQ0	ZNF419	19	57999331	13	G	A	5	A	T	probably damaging	DOID:219 / colon cancer/MER50	-	4790	GE	MER50like	NM_001098492/22895193/['COSMIC']	NM_001098494/22895193/['COSMIC']	NM_001098491/22895193/['COSMIC']	NM_001098495/22895193/['COSMIC']
Canon	Q96HQ0	ZNF419	19	57999331	13	G	A	5	A	T	probably damaging	DOID:1793 / pancreatic cancer/MER50	-	4790	GE	MER50like	NM_001098494/-/['COSMIC']	NM_024691/-/['COSMIC']	NM_001098491/-/['COSMIC']	NM_001098495/-/['COSMIC']
Canon	Q96HQ0	ZNF419	19	58001515	34	G	T	12	V	F	possibly damaging	DOID:3571 / liver cancer/MER50	-	4790	GE	MER50like	NM_001098494/23788652/['COSMIC']	NM_001291743/23788652/['COSMIC']	NM_001098491/23788652/['COSMIC']	NM_024691/23788652/['COSMIC']
Canon	Q96HQ0	ZNF419	19	58001533	52	T	G	18	L	V	benign	DOID:5041 / esophageal cancer/MER50	-	4790	GE	MER50like	NM_024691/-/['ICGC']	NM_001098491/-/['ICGC']	NM_001291743/-/['ICGC']	NM_001098494/-/['ICGC']
Canon	Q96HQ0	ZNF419	19	58001548	67	G	A	23	E	K	benign	DOID:11054 / urinary bladder cancer/MER50	-	4790	GE	MER50like	NM_001291743/-/['COSMIC', 'ICGC']	NM_001098491/-/['COSMIC', 'ICGC']	NM_024691/24121792/['COSMIC']	NM_001098494/-/['COSMIC', 'ICGC']
Canon	Q96HQ0	ZNF419	19	58002858	56	A	G	19	D	G	probably damaging	DOID:219 / colon cancer/MER50	-	4790	GE	MER50like	NM_001098495/-/['ICGC', 'TCGA']	NM_001291745/-/['ICGC', 'TCGA']	NM_001098492/-/['ICGC', 'TCGA']
Canon	Q96HQ0	ZNF419	19	58002858	95	A	G	32	D	G	probably damaging	DOID:219 / colon cancer/MER50	-	4790	GE	MER50like	NM_001098494/-/['ICGC', 'TCGA']	NM_001098491/-/['ICGC', 'TCGA']
Canon	Q96HQ0	ZNF419	19	58002858	92	A	G	31	D	G	probably damaging	DOID:219 / colon cancer/MER50	-	4790	GE	MER50like	NM_024691/-/['ICGC', 'TCGA']	NM_001291743/-/['ICGC', 'TCGA']
Canon	Q96HQ0	ZNF419	19	58002858	53	A	G	18	D	G	probably damaging	DOID:219 / colon cancer/MER50	-	4790	GE	MER50like	NM_001098493/-/['ICGC', 'TCGA']	NM_001098496/-/['ICGC', 'TCGA']
Canon	Q96HQ0	ZNF419	19	58002858	56	A	G	19	D	G	probably damaging	DOID:1521 / cecum cancer/MER50	-	4790	GE	MER50like	NM_001098492/-/['COSMIC']	NM_001291745/-/['COSMIC']	NM_001098495/-/['COSMIC']
Canon	Q96HQ0	ZNF419	19	58002858	92	A	G	31	D	G	probably damaging	DOID:1521 / cecum cancer/MER50	-	4790	GE	MER50like	NM_001291743/-/['COSMIC']	NM_024691/-/['COSMIC']
Canon	Q96HQ0	ZNF419	19	58002858	95	A	G	32	D	G	probably damaging	DOID:1521 / cecum cancer/MER50	-	4790	GE	MER50like	NM_001098494/-/['COSMIC']	NM_001098491/-/['COSMIC']
Canon	Q96HQ0	ZNF419	19	58002858	53	A	G	18	D	G	probably damaging	DOID:1521 / cecum cancer/MER50	-	4790	GE	MER50like	NM_001098496/-/['COSMIC']	NM_001098493/-/['COSMIC']
Canon	Q96HQ0	ZNF419	19	58002889	123	G	C	41	W	C	probably damaging	DOID:1324 / lung cancer/MER50	-	4790	GE	MER50like	NM_001291743/22980975/['COSMIC']	NM_024691/22980975/['COSMIC']
Canon	Q96HQ0	ZNF419	19	58002889	84	G	C	28	W	C	probably damaging	DOID:1324 / lung cancer/MER50	-	4790	GE	MER50like	NM_001098493/22980975/['COSMIC']	NM_001098496/22980975/['COSMIC']
Canon	Q96HQ0	ZNF419	19	58002889	126	G	C	42	W	C	probably damaging	DOID:1324 / lung cancer/MER50	-	4790	GE	MER50like	NM_001098491/22980975/['COSMIC']	NM_001098494/22980975/['COSMIC']
Canon	Q96HQ0	ZNF419	19	58002889	87	G	C	29	W	C	probably damaging	DOID:1324 / lung cancer/MER50	-	4790	GE	MER50like	NM_001291745/22980975/['COSMIC']	NM_001098495/22980975/['COSMIC']	NM_001098492/22980975/['COSMIC']
Canon	Q96HQ0	ZNF419	19	58002899	94	G	C	32	D	H	probably damaging	DOID:11054 / urinary bladder cancer/MER50	-	4790	GE	MER50like	NM_001098496/24121792/['COSMIC']	NM_001098496/-/['COSMIC', 'ICGC']	NM_001098493/-/['COSMIC', 'ICGC']	NM_001098493/24121792/['COSMIC']
Canon	Q96HQ0	ZNF419	19	58002899	136	G	C	46	D	H	probably damaging	DOID:11054 / urinary bladder cancer/MER50	-	4790	GE	MER50like	NM_001098494/-/['COSMIC', 'ICGC']	NM_001098494/24121792/['COSMIC']	NM_001098491/-/['COSMIC', 'ICGC']	NM_001098491/24121792/['COSMIC']
Canon	Q96HQ0	ZNF419	19	58002899	133	G	C	45	D	H	probably damaging	DOID:11054 / urinary bladder cancer/MER50	Gain|Phosphorylation	4790	GE	MER50like	NM_024691/-/['COSMIC', 'ICGC']	NM_001291743/-/['COSMIC', 'ICGC']	NM_024691/24121792/['COSMIC']	NM_001291743/24121792/['COSMIC']
Canon	Q96HQ0	ZNF419	19	58002899	97	G	C	33	D	H	probably damaging	DOID:11054 / urinary bladder cancer/MER50	-	4790	GE	MER50like	NM_001291745/-/['COSMIC', 'ICGC']	NM_001098492/-/['COSMIC', 'ICGC']	NM_001098492/24121792/['COSMIC']	NM_001098495/24121792/['COSMIC']
Canon	Q96HQ0	ZNF419	19	58002917	151	C	T	51	L	F	probably damaging	DOID:4159 / skin cancer/MER50	-	4790	GE	MER50like	NM_001291743/-/['ICGC', 'TCGA']	NM_024691/-/['ICGC', 'TCGA']
Canon	Q96HQ0	ZNF419	19	58002917	154	C	T	52	L	F	probably damaging	DOID:4159 / skin cancer/MER50	-	4790	GE	MER50like	NM_001098494/-/['ICGC', 'TCGA']	NM_001098491/-/['ICGC', 'TCGA']
Canon	Q96HQ0	ZNF419	19	58002917	112	C	T	38	L	F	probably damaging	DOID:4159 / skin cancer/MER50	-	4790	GE	MER50like	NM_001098496/-/['ICGC', 'TCGA']	NM_001098493/-/['ICGC', 'TCGA']
Canon	Q96HQ0	ZNF419	19	58002917	115	C	T	39	L	F	probably damaging	DOID:4159 / skin cancer/MER50	-	4790	GE	MER50like	NM_001098492/-/['ICGC', 'TCGA']	NM_001098495/-/['ICGC', 'TCGA']	NM_001291745/-/['ICGC', 'TCGA']
Canon	Q96HQ0	ZNF419	19	58002923	118	C	T	40	R	C	benign	DOID:363 / uterine cancer/MER50	-	4790	GE	MER50like	NM_001098496/-/['IntOGen', 'TCGA', 'COSMIC']	NM_001098493/-/['IntOGen', 'TCGA', 'COSMIC']
Canon	Q96HQ0	ZNF419	19	58002923	160	C	T	54	R	C	benign	DOID:363 / uterine cancer/MER50	-	4790	GE	MER50like	NM_001098491/-/['IntOGen', 'TCGA', 'COSMIC']	NM_001098494/-/['IntOGen', 'TCGA', 'COSMIC']
Canon	Q96HQ0	ZNF419	19	58002923	157	C	T	53	R	C	benign	DOID:363 / uterine cancer/MER50	-	4790	GE	MER50like	NM_001291743/-/['IntOGen', 'TCGA', 'COSMIC']	NM_024691/-/['IntOGen', 'TCGA', 'COSMIC']
Canon	Q96HQ0	ZNF419	19	58002923	121	C	T	41	R	C	benign	DOID:363 / uterine cancer/MER50	-	4790	GE	MER50like	NM_001098495/-/['IntOGen', 'TCGA', 'COSMIC']	NM_001098492/-/['IntOGen', 'TCGA', 'COSMIC']	NM_001291745/-/['IntOGen', 'TCGA', 'COSMIC']
Canon	Q96HQ0	ZNF419	19	58002924	161	G	A	54	R	H	possibly damaging	DOID:219 / colon cancer/MER50	-	4790	GE	MER50like	NM_001098491/-/['ICGC', 'TCGA', 'COSMIC']	NM_001098494/-/['ICGC', 'TCGA', 'COSMIC']
Canon	Q96HQ0	ZNF419	19	58002924	119	G	A	40	R	H	possibly damaging	DOID:219 / colon cancer/MER50	-	4790	GE	MER50like	NM_001098493/-/['ICGC', 'TCGA', 'COSMIC']	NM_001098496/-/['ICGC', 'TCGA', 'COSMIC']
Canon	Q96HQ0	ZNF419	19	58002924	122	G	A	41	R	H	possibly damaging	DOID:219 / colon cancer/MER50	-	4790	GE	MER50like	NM_001098495/-/['ICGC', 'TCGA', 'COSMIC']	NM_001098492/-/['ICGC', 'TCGA', 'COSMIC']	NM_001291745/-/['ICGC', 'TCGA', 'COSMIC']
Canon	Q96HQ0	ZNF419	19	58002924	158	G	A	53	R	H	possibly damaging	DOID:219 / colon cancer/MER50	-	4790	GE	MER50like	NM_024691/-/['ICGC', 'TCGA', 'COSMIC']	NM_001291743/-/['ICGC', 'TCGA', 'COSMIC']
Canon	Q96HQ0	ZNF419	19	58002924	158	G	A	53	R	H	possibly damaging	DOID:1324 / lung cancer/MER50	-	4790	GE	MER50like	NM_024691/23033341/['COSMIC']	NM_001291743/23033341/['COSMIC']
Canon	Q96HQ0	ZNF419	19	58002924	119	G	A	40	R	H	possibly damaging	DOID:1324 / lung cancer/MER50	-	4790	GE	MER50like	NM_001098496/23033341/['COSMIC']	NM_001098493/23033341/['COSMIC']
Canon	Q96HQ0	ZNF419	19	58002924	161	G	A	54	R	H	possibly damaging	DOID:1324 / lung cancer/MER50	-	4790	GE	MER50like	NM_001098494/23033341/['COSMIC']	NM_001098491/23033341/['COSMIC']
Canon	Q96HQ0	ZNF419	19	58002924	122	G	A	41	R	H	possibly damaging	DOID:1324 / lung cancer/MER50	-	4790	GE	MER50like	NM_001098495/23033341/['COSMIC']	NM_001098492/23033341/['COSMIC']	NM_001291745/23033341/['COSMIC']
Canon	Q96HQ0	ZNF419	19	58002957	191	C	T	64	A	V	probably damaging	DOID:219 / colon cancer/MER50	-	4790	GE	MER50like	NM_024691/-/['COSMIC', 'IntOGen']	NM_001291743/-/['COSMIC', 'IntOGen']
Canon	Q96HQ0	ZNF419	19	58002957	194	C	T	65	A	V	probably damaging	DOID:219 / colon cancer/MER50	-	4790	GE	MER50like	NM_001098494/-/['COSMIC', 'IntOGen']	NM_001098491/-/['COSMIC', 'IntOGen']
Canon	Q96HQ0	ZNF419	19	58002957	155	C	T	52	A	V	probably damaging	DOID:219 / colon cancer/MER50	-	4790	GE	MER50like	NM_001291745/-/['COSMIC', 'IntOGen']	NM_001098495/-/['COSMIC', 'IntOGen']	NM_001098492/-/['COSMIC', 'IntOGen']
Canon	Q96HQ0	ZNF419	19	58002957	152	C	T	51	A	V	probably damaging	DOID:219 / colon cancer/MER50	-	4790	GE	MER50like	NM_001098493/-/['COSMIC', 'IntOGen']	NM_001098496/-/['COSMIC', 'IntOGen']
Canon	Q96HQ0	ZNF419	19	58003528	211	G	A	71	E	K	benign	DOID:4159 / skin cancer/MER50	-	4790	GE	MER50like	NM_001098492/-/['TCGA']	NM_001291745/-/['TCGA']
Canon	Q96HQ0	ZNF419	19	58003528	250	G	A	84	E	K	benign	DOID:4159 / skin cancer/MER50	-	4790	GE	MER50like	NM_001098491/-/['TCGA']
Canon	Q96HQ0	ZNF419	19	58003528	208	G	A	70	E	K	benign	DOID:4159 / skin cancer/MER50	-	4790	GE	MER50like	NM_001098493/-/['TCGA']
Canon	Q96HQ0	ZNF419	19	58003528	247	G	A	83	E	K	benign	DOID:4159 / skin cancer/MER50	-	4790	GE	MER50like	NM_024691/-/['TCGA']
Canon	Q96HQ0	ZNF419	19	58003535	257	C	T	86	P	L	probably damaging	DOID:4159 / skin cancer/MER50	-	4790	GE	MER50like	NM_001098491/-/['TCGA']
Canon	Q96HQ0	ZNF419	19	58003535	254	C	T	85	P	L	probably damaging	DOID:4159 / skin cancer/MER50	-	4790	GE	MER50like	NM_024691/-/['TCGA']
Canon	Q96HQ0	ZNF419	19	58003535	218	C	T	73	P	L	probably damaging	DOID:4159 / skin cancer/MER50	-	4790	GE	MER50like	NM_001291745/-/['TCGA']	NM_001098492/-/['TCGA']
Canon	Q96HQ0	ZNF419	19	58003535	215	C	T	72	P	L	probably damaging	DOID:4159 / skin cancer/MER50	-	4790	GE	MER50like	NM_001098493/-/['TCGA']
Canon	Q96HQ0	ZNF419	19	58003544	227	C	T	76	P	L	benign	DOID:1612 / breast cancer/MER50	-	4790	GE	MER50like	NM_001098492/-/['COSMIC', 'IntOGen', 'ICGC', 'TCGA']	NM_001291745/-/['COSMIC', 'IntOGen', 'ICGC', 'TCGA']
Canon	Q96HQ0	ZNF419	19	58003544	224	C	T	75	P	L	benign	DOID:1612 / breast cancer/MER50	-	4790	GE	MER50like	NM_001098493/-/['COSMIC', 'IntOGen', 'ICGC', 'TCGA']
Canon	Q96HQ0	ZNF419	19	58003544	266	C	T	89	P	L	benign	DOID:1612 / breast cancer/MER50	-	4790	GE	MER50like	NM_001098491/-/['COSMIC', 'IntOGen', 'ICGC', 'TCGA']
Canon	Q96HQ0	ZNF419	19	58003544	263	C	T	88	P	L	benign	DOID:1612 / breast cancer/MER50	-	4790	GE	MER50like	NM_024691/-/['COSMIC', 'IntOGen', 'ICGC', 'TCGA']
Canon	Q96HQ0	ZNF419	19	58003568	251	C	T	84	A	V	possibly damaging	DOID:219 / colon cancer/MER50	-	4790	GE	MER50like	NM_001291745/22895193/['COSMIC']	NM_001098492/22895193/['COSMIC']
Canon	Q96HQ0	ZNF419	19	58003568	290	C	T	97	A	V	possibly damaging	DOID:219 / colon cancer/MER50	-	4790	GE	MER50like	NM_001098491/22895193/['COSMIC']
Canon	Q96HQ0	ZNF419	19	58003568	248	C	T	83	A	V	possibly damaging	DOID:219 / colon cancer/MER50	-	4790	GE	MER50like	NM_001098493/22895193/['COSMIC']
Canon	Q96HQ0	ZNF419	19	58003568	287	C	T	96	A	V	possibly damaging	DOID:219 / colon cancer/MER50	Gain|Phosphorylation	4790	GE	MER50like	NM_024691/22895193/['COSMIC']
Canon	Q96HQ0	ZNF419	19	58004235	211	G	T	71	G	X	-	DOID:1324 / lung cancer/MER50	-	4790	GE	MER50like	NM_001291743/23856246/['COSMIC']
Canon	Q96HQ0	ZNF419	19	58004235	214	G	T	72	G	X	-	DOID:1324 / lung cancer/MER50	-	4790	GE	MER50like	NM_001098494/23856246/['COSMIC']
Canon	Q96HQ0	ZNF419	19	58004235	46	G	T	16	G	X	-	DOID:1324 / lung cancer/MER50	-	4790	GE	MER50like	NM_001291744/23856246/['COSMIC']
Canon	Q96HQ0	ZNF419	19	58004235	310	G	T	104	G	X	-	DOID:1324 / lung cancer/MER50	-	4790	GE	MER50like	NM_024691/23856246/['COSMIC']
Canon	Q96HQ0	ZNF419	19	58004235	274	G	T	92	G	X	-	DOID:1324 / lung cancer/MER50	-	4790	GE	MER50like	NM_001098492/23856246/['COSMIC']
Canon	Q96HQ0	ZNF419	19	58004235	172	G	T	58	G	X	-	DOID:1324 / lung cancer/MER50	-	4790	GE	MER50like	NM_001098496/23856246/['COSMIC']
Canon	Q96HQ0	ZNF419	19	58004235	175	G	T	59	G	X	-	DOID:1324 / lung cancer/MER50	-	4790	GE	MER50like	NM_001098495/23856246/['COSMIC']
Canon	Q96HQ0	ZNF419	19	58004235	313	G	T	105	G	X	-	DOID:1324 / lung cancer/MER50	-	4790	GE	MER50like	NM_001098491/23856246/['COSMIC']
Canon	Q96HQ0	ZNF419	19	58004235	271	G	T	91	G	X	-	DOID:1324 / lung cancer/MER50	-	4790	GE	MER50like	NM_001098493/23856246/['COSMIC']
Canon	Q96HQ0	ZNF419	19	58004247	187	G	A	63	E	K	benign	DOID:11054 / urinary bladder cancer/MER50	-	4790	GE	MER50like	NM_001098495/-/['COSMIC', 'IntOGen']
Canon	Q96HQ0	ZNF419	19	58004247	58	G	A	20	E	K	benign	DOID:11054 / urinary bladder cancer/MER50	-	4790	GE	MER50like	NM_001291744/-/['COSMIC', 'IntOGen']
Canon	Q96HQ0	ZNF419	19	58004247	325	G	A	109	E	K	benign	DOID:11054 / urinary bladder cancer/MER50	-	4790	GE	MER50like	NM_001098491/-/['COSMIC', 'IntOGen']
Canon	Q96HQ0	ZNF419	19	58004247	322	G	A	108	E	K	benign	DOID:11054 / urinary bladder cancer/MER50	-	4790	GE	MER50like	NM_024691/-/['COSMIC', 'IntOGen']
Canon	Q96HQ0	ZNF419	19	58004247	226	G	A	76	E	K	benign	DOID:11054 / urinary bladder cancer/MER50	-	4790	GE	MER50like	NM_001098494/-/['COSMIC', 'IntOGen']
Canon	Q96HQ0	ZNF419	19	58004247	286	G	A	96	E	K	benign	DOID:11054 / urinary bladder cancer/MER50	-	4790	GE	MER50like	NM_001098492/-/['COSMIC', 'IntOGen']
Canon	Q96HQ0	ZNF419	19	58004247	184	G	A	62	E	K	benign	DOID:11054 / urinary bladder cancer/MER50	-	4790	GE	MER50like	NM_001098496/-/['COSMIC', 'IntOGen']
Canon	Q96HQ0	ZNF419	19	58004247	223	G	A	75	E	K	benign	DOID:11054 / urinary bladder cancer/MER50	-	4790	GE	MER50like	NM_001291743/-/['COSMIC', 'IntOGen']
Canon	Q96HQ0	ZNF419	19	58004247	283	G	A	95	E	K	benign	DOID:11054 / urinary bladder cancer/MER50	-	4790	GE	MER50like	NM_001098493/-/['COSMIC', 'IntOGen']
Canon	Q96HQ0	ZNF419	19	58004257	68	C	T	23	P	L	possibly damaging	DOID:4159 / skin cancer/MER50	-	4790	GE	MER50like	NM_001291744/24838835/['COSMIC']
Canon	Q96HQ0	ZNF419	19	58004257	335	C	T	112	P	L	possibly damaging	DOID:4159 / skin cancer/MER50	-	4790	GE	MER50like	NM_001098491/24838835/['COSMIC']
Canon	Q96HQ0	ZNF419	19	58004257	197	C	T	66	P	L	possibly damaging	DOID:4159 / skin cancer/MER50	-	4790	GE	MER50like	NM_001098495/24838835/['COSMIC']
Canon	Q96HQ0	ZNF419	19	58004257	296	C	T	99	P	L	possibly damaging	DOID:4159 / skin cancer/MER50	-	4790	GE	MER50like	NM_001098492/24838835/['COSMIC']
Canon	Q96HQ0	ZNF419	19	58004257	233	C	T	78	P	L	possibly damaging	DOID:4159 / skin cancer/MER50	-	4790	GE	MER50like	NM_001291743/24838835/['COSMIC']
Canon	Q96HQ0	ZNF419	19	58004257	236	C	T	79	P	L	possibly damaging	DOID:4159 / skin cancer/MER50	-	4790	GE	MER50like	NM_001098494/24838835/['COSMIC']
Canon	Q96HQ0	ZNF419	19	58004257	293	C	T	98	P	L	possibly damaging	DOID:4159 / skin cancer/MER50	-	4790	GE	MER50like	NM_001098493/24838835/['COSMIC']
Canon	Q96HQ0	ZNF419	19	58004257	194	C	T	65	P	L	possibly damaging	DOID:4159 / skin cancer/MER50	-	4790	GE	MER50like	NM_001098496/24838835/['COSMIC']
Canon	Q96HQ0	ZNF419	19	58004257	332	C	T	111	P	L	possibly damaging	DOID:4159 / skin cancer/MER50	-	4790	GE	MER50like	NM_024691/24838835/['COSMIC']
Canon	Q96HQ0	ZNF419	19	58004272	350	C	T	117	S	F	possibly damaging	DOID:263 / kidney cancer/MER50	-	4790	GE	MER50like	NM_001098491/23797736/['COSMIC']
Canon	Q96HQ0	ZNF419	19	58004272	212	C	T	71	S	F	possibly damaging	DOID:263 / kidney cancer/MER50	-	4790	GE	MER50like	NM_001098495/23797736/['COSMIC']
Canon	Q96HQ0	ZNF419	19	58004272	308	C	T	103	S	F	possibly damaging	DOID:263 / kidney cancer/MER50	-	4790	GE	MER50like	NM_001098493/23797736/['COSMIC']
Canon	Q96HQ0	ZNF419	19	58004272	209	C	T	70	S	F	possibly damaging	DOID:263 / kidney cancer/MER50	-	4790	GE	MER50like	NM_001098496/23797736/['COSMIC']
Canon	Q96HQ0	ZNF419	19	58004272	248	C	T	83	S	F	possibly damaging	DOID:263 / kidney cancer/MER50	-	4790	GE	MER50like	NM_001291743/23797736/['COSMIC']
Canon	Q96HQ0	ZNF419	19	58004272	83	C	T	28	S	F	possibly damaging	DOID:263 / kidney cancer/MER50	-	4790	GE	MER50like	NM_001291744/23797736/['COSMIC']
Canon	Q96HQ0	ZNF419	19	58004272	347	C	T	116	S	F	possibly damaging	DOID:263 / kidney cancer/MER50	-	4790	GE	MER50like	NM_024691/23797736/['COSMIC']
Canon	Q96HQ0	ZNF419	19	58004272	311	C	T	104	S	F	possibly damaging	DOID:263 / kidney cancer/MER50	-	4790	GE	MER50like	NM_001098492/23797736/['COSMIC']
Canon	Q96HQ0	ZNF419	19	58004272	251	C	T	84	S	F	possibly damaging	DOID:263 / kidney cancer/MER50	-	4790	GE	MER50like	NM_001098494/23797736/['COSMIC']
Canon	Q96HQ0	ZNF419	19	58004287	323	G	A	108	S	N	possibly damaging	DOID:0060119 / pharynx cancer/MER50	-	4790	GE	MER50like	NM_001098493/-/['IntOGen']
Canon	Q96HQ0	ZNF419	19	58004287	263	G	A	88	S	N	possibly damaging	DOID:0060119 / pharynx cancer/MER50	-	4790	GE	MER50like	NM_001291743/-/['IntOGen']
Canon	Q96HQ0	ZNF419	19	58004287	326	G	A	109	S	N	possibly damaging	DOID:0060119 / pharynx cancer/MER50	-	4790	GE	MER50like	NM_001098492/-/['IntOGen']
Canon	Q96HQ0	ZNF419	19	58004287	224	G	A	75	S	N	possibly damaging	DOID:0060119 / pharynx cancer/MER50	-	4790	GE	MER50like	NM_001098496/-/['IntOGen']
Canon	Q96HQ0	ZNF419	19	58004287	365	G	A	122	S	N	possibly damaging	DOID:0060119 / pharynx cancer/MER50	-	4790	GE	MER50like	NM_001098491/-/['IntOGen']
Canon	Q96HQ0	ZNF419	19	58004287	98	G	A	33	S	N	possibly damaging	DOID:0060119 / pharynx cancer/MER50	-	4790	GE	MER50like	NM_001291744/-/['IntOGen']
Canon	Q96HQ0	ZNF419	19	58004287	362	G	A	121	S	N	possibly damaging	DOID:0060119 / pharynx cancer/MER50	-	4790	GE	MER50like	NM_024691/-/['IntOGen']
Canon	Q96HQ0	ZNF419	19	58004287	227	G	A	76	S	N	possibly damaging	DOID:0060119 / pharynx cancer/MER50	-	4790	GE	MER50like	NM_001098495/-/['IntOGen']
Canon	Q96HQ0	ZNF419	19	58004287	266	G	A	89	S	N	possibly damaging	DOID:0060119 / pharynx cancer/MER50	-	4790	GE	MER50like	NM_001098494/-/['IntOGen']
Canon	Q96HQ0	ZNF419	19	58004287	227	G	A	76	S	N	possibly damaging	DOID:11934 / head and neck cancer/MER50	-	4790	GE	MER50like	NM_001098495/-/['TCGA']
Canon	Q96HQ0	ZNF419	19	58004287	362	G	A	121	S	N	possibly damaging	DOID:11934 / head and neck cancer/MER50	-	4790	GE	MER50like	NM_024691/-/['TCGA']
Canon	Q96HQ0	ZNF419	19	58004287	365	G	A	122	S	N	possibly damaging	DOID:11934 / head and neck cancer/MER50	-	4790	GE	MER50like	NM_001098491/-/['TCGA']
Canon	Q96HQ0	ZNF419	19	58004287	326	G	A	109	S	N	possibly damaging	DOID:11934 / head and neck cancer/MER50	-	4790	GE	MER50like	NM_001098492/-/['TCGA']
Canon	Q96HQ0	ZNF419	19	58004287	224	G	A	75	S	N	possibly damaging	DOID:11934 / head and neck cancer/MER50	-	4790	GE	MER50like	NM_001098496/-/['TCGA']
Canon	Q96HQ0	ZNF419	19	58004287	323	G	A	108	S	N	possibly damaging	DOID:11934 / head and neck cancer/MER50	-	4790	GE	MER50like	NM_001098493/-/['TCGA']
Canon	Q96HQ0	ZNF419	19	58004287	98	G	A	33	S	N	possibly damaging	DOID:11934 / head and neck cancer/MER50	-	4790	GE	MER50like	NM_001291744/-/['TCGA']
Canon	Q96HQ0	ZNF419	19	58004287	263	G	A	88	S	N	possibly damaging	DOID:11934 / head and neck cancer/MER50	-	4790	GE	MER50like	NM_001291743/-/['TCGA']
Canon	Q96HQ0	ZNF419	19	58004287	266	G	A	89	S	N	possibly damaging	DOID:11934 / head and neck cancer/MER50	-	4790	GE	MER50like	NM_001098494/-/['TCGA']
Canon	Q96HQ0	ZNF419	19	58004323	362	G	T	121	G	V	probably damaging	DOID:1324 / lung cancer/MER50	-	4790	GE	MER50like	NM_001098492/22980975/['COSMIC']
Canon	Q96HQ0	ZNF419	19	58004323	359	G	T	120	G	V	probably damaging	DOID:1324 / lung cancer/MER50	-	4790	GE	MER50like	NM_001098493/22980975/['COSMIC']
Canon	Q96HQ0	ZNF419	19	58004323	134	G	T	45	G	V	probably damaging	DOID:1324 / lung cancer/MER50	-	4790	GE	MER50like	NM_001291744/22980975/['COSMIC']
Canon	Q96HQ0	ZNF419	19	58004323	401	G	T	134	G	V	probably damaging	DOID:1324 / lung cancer/MER50	-	4790	GE	MER50like	NM_001098491/22980975/['COSMIC']
Canon	Q96HQ0	ZNF419	19	58004323	302	G	T	101	G	V	probably damaging	DOID:1324 / lung cancer/MER50	-	4790	GE	MER50like	NM_001098494/22980975/['COSMIC']
Canon	Q96HQ0	ZNF419	19	58004323	263	G	T	88	G	V	probably damaging	DOID:1324 / lung cancer/MER50	-	4790	GE	MER50like	NM_001098495/22980975/['COSMIC']
Canon	Q96HQ0	ZNF419	19	58004323	398	G	T	133	G	V	probably damaging	DOID:1324 / lung cancer/MER50	-	4790	GE	MER50like	NM_024691/22980975/['COSMIC']
Canon	Q96HQ0	ZNF419	19	58004323	299	G	T	100	G	V	probably damaging	DOID:1324 / lung cancer/MER50	-	4790	GE	MER50like	NM_001291743/22980975/['COSMIC']
Canon	Q96HQ0	ZNF419	19	58004323	260	G	T	87	G	V	probably damaging	DOID:1324 / lung cancer/MER50	-	4790	GE	MER50like	NM_001098496/22980975/['COSMIC']
Canon	Q96HQ0	ZNF419	19	58004329	365	A	C	122	K	T	probably damaging	DOID:10534 / stomach cancer/MER50	-	4790	GE	MER50like	NM_001098493/-/['ICGC', 'TCGA']
Canon	Q96HQ0	ZNF419	19	58004329	308	A	C	103	K	T	probably damaging	DOID:10534 / stomach cancer/MER50	-	4790	GE	MER50like	NM_001098494/-/['ICGC', 'TCGA']
Canon	Q96HQ0	ZNF419	19	58004329	407	A	C	136	K	T	probably damaging	DOID:10534 / stomach cancer/MER50	-	4790	GE	MER50like	NM_001098491/-/['ICGC', 'TCGA']
Canon	Q96HQ0	ZNF419	19	58004329	269	A	C	90	K	T	probably damaging	DOID:10534 / stomach cancer/MER50	-	4790	GE	MER50like	NM_001098495/-/['ICGC', 'TCGA']
Canon	Q96HQ0	ZNF419	19	58004329	266	A	C	89	K	T	probably damaging	DOID:10534 / stomach cancer/MER50	-	4790	GE	MER50like	NM_001098496/-/['ICGC', 'TCGA']
Canon	Q96HQ0	ZNF419	19	58004329	140	A	C	47	K	T	probably damaging	DOID:10534 / stomach cancer/MER50	-	4790	GE	MER50like	NM_001291744/-/['ICGC', 'TCGA']
Canon	Q96HQ0	ZNF419	19	58004329	305	A	C	102	K	T	probably damaging	DOID:10534 / stomach cancer/MER50	-	4790	GE	MER50like	NM_001291743/-/['ICGC', 'TCGA']
Canon	Q96HQ0	ZNF419	19	58004329	404	A	C	135	K	T	probably damaging	DOID:10534 / stomach cancer/MER50	-	4790	GE	MER50like	NM_024691/-/['ICGC', 'TCGA']
Canon	Q96HQ0	ZNF419	19	58004329	368	A	C	123	K	T	probably damaging	DOID:10534 / stomach cancer/MER50	-	4790	GE	MER50like	NM_001098492/-/['ICGC', 'TCGA']
Canon	Q96HQ0	ZNF419	19	58004346	157	G	C	53	E	Q	possibly damaging	DOID:219 / colon cancer/MER50	-	4790	GE	MER50like	NM_001291744/-/['COSMIC', 'ICGC', 'TCGA']
Canon	Q96HQ0	ZNF419	19	58004346	286	G	C	96	E	Q	possibly damaging	DOID:219 / colon cancer/MER50	-	4790	GE	MER50like	NM_001098495/-/['COSMIC', 'ICGC', 'TCGA']
Canon	Q96HQ0	ZNF419	19	58004346	385	G	C	129	E	Q	possibly damaging	DOID:219 / colon cancer/MER50	-	4790	GE	MER50like	NM_001098492/-/['COSMIC', 'ICGC', 'TCGA']
Canon	Q96HQ0	ZNF419	19	58004346	382	G	C	128	E	Q	possibly damaging	DOID:219 / colon cancer/MER50	-	4790	GE	MER50like	NM_001098493/-/['COSMIC', 'ICGC', 'TCGA']
Canon	Q96HQ0	ZNF419	19	58004346	283	G	C	95	E	Q	possibly damaging	DOID:219 / colon cancer/MER50	-	4790	GE	MER50like	NM_001098496/-/['COSMIC', 'ICGC', 'TCGA']
Canon	Q96HQ0	ZNF419	19	58004346	322	G	C	108	E	Q	possibly damaging	DOID:219 / colon cancer/MER50	-	4790	GE	MER50like	NM_001291743/-/['COSMIC', 'ICGC', 'TCGA']
Canon	Q96HQ0	ZNF419	19	58004346	421	G	C	141	E	Q	possibly damaging	DOID:219 / colon cancer/MER50	-	4790	GE	MER50like	NM_024691/-/['COSMIC', 'ICGC', 'TCGA']
Canon	Q96HQ0	ZNF419	19	58004346	424	G	C	142	E	Q	possibly damaging	DOID:219 / colon cancer/MER50	-	4790	GE	MER50like	NM_001098491/-/['COSMIC', 'ICGC', 'TCGA']
Canon	Q96HQ0	ZNF419	19	58004346	325	G	C	109	E	Q	possibly damaging	DOID:219 / colon cancer/MER50	-	4790	GE	MER50like	NM_001098494/-/['COSMIC', 'ICGC', 'TCGA']
Canon	Q96HQ0	ZNF419	19	58004370	445	A	T	149	S	C	probably damaging	DOID:10534 / stomach cancer/MER50	Gain|Phosphorylation	4790	GE	MER50like	NM_024691/-/['TCGA']
Canon	Q96HQ0	ZNF419	19	58004370	406	A	T	136	S	C	probably damaging	DOID:10534 / stomach cancer/MER50	-	4790	GE	MER50like	NM_001098493/-/['TCGA']
Canon	Q96HQ0	ZNF419	19	58004370	310	A	T	104	S	C	probably damaging	DOID:10534 / stomach cancer/MER50	-	4790	GE	MER50like	NM_001098495/-/['TCGA']
Canon	Q96HQ0	ZNF419	19	58004370	307	A	T	103	S	C	probably damaging	DOID:10534 / stomach cancer/MER50	-	4790	GE	MER50like	NM_001098496/-/['TCGA']
Canon	Q96HQ0	ZNF419	19	58004370	346	A	T	116	S	C	probably damaging	DOID:10534 / stomach cancer/MER50	-	4790	GE	MER50like	NM_001291743/-/['TCGA']
Canon	Q96HQ0	ZNF419	19	58004370	181	A	T	61	S	C	probably damaging	DOID:10534 / stomach cancer/MER50	-	4790	GE	MER50like	NM_001291744/-/['TCGA']
Canon	Q96HQ0	ZNF419	19	58004370	349	A	T	117	S	C	probably damaging	DOID:10534 / stomach cancer/MER50	-	4790	GE	MER50like	NM_001098494/-/['TCGA']
Canon	Q96HQ0	ZNF419	19	58004370	409	A	T	137	S	C	probably damaging	DOID:10534 / stomach cancer/MER50	-	4790	GE	MER50like	NM_001098492/-/['TCGA']
Canon	Q96HQ0	ZNF419	19	58004370	448	A	T	150	S	C	probably damaging	DOID:10534 / stomach cancer/MER50	-	4790	GE	MER50like	NM_001098491/-/['TCGA']
Canon	Q96HQ0	ZNF419	19	58004376	451	A	G	151	K	E	benign	DOID:1324 / lung cancer/MER50	-	4790	GE	MER50like	NM_024691/-/['IntOGen']	NM_024691/22941188/['COSMIC']
Canon	Q96HQ0	ZNF419	19	58004376	313	A	G	105	K	E	benign	DOID:1324 / lung cancer/MER50	-	4790	GE	MER50like	NM_001098496/-/['IntOGen']	NM_001098496/22941188/['COSMIC']
Canon	Q96HQ0	ZNF419	19	58004376	355	A	G	119	K	E	benign	DOID:1324 / lung cancer/MER50	-	4790	GE	MER50like	NM_001098494/-/['IntOGen']	NM_001098494/22941188/['COSMIC']
Canon	Q96HQ0	ZNF419	19	58004376	454	A	G	152	K	E	benign	DOID:1324 / lung cancer/MER50	-	4790	GE	MER50like	NM_001098491/22941188/['COSMIC']	NM_001098491/-/['IntOGen']
Canon	Q96HQ0	ZNF419	19	58004376	415	A	G	139	K	E	benign	DOID:1324 / lung cancer/MER50	-	4790	GE	MER50like	NM_001098492/22941188/['COSMIC']	NM_001098492/-/['IntOGen']
Canon	Q96HQ0	ZNF419	19	58004376	412	A	G	138	K	E	benign	DOID:1324 / lung cancer/MER50	-	4790	GE	MER50like	NM_001098493/-/['IntOGen']	NM_001098493/22941188/['COSMIC']
Canon	Q96HQ0	ZNF419	19	58004376	316	A	G	106	K	E	benign	DOID:1324 / lung cancer/MER50	-	4790	GE	MER50like	NM_001098495/-/['IntOGen']	NM_001098495/22941188/['COSMIC']
Canon	Q96HQ0	ZNF419	19	58004376	352	A	G	118	K	E	benign	DOID:1324 / lung cancer/MER50	-	4790	GE	MER50like	NM_001291743/22941188/['COSMIC']	NM_001291743/-/['IntOGen']
Canon	Q96HQ0	ZNF419	19	58004376	187	A	G	63	K	E	benign	DOID:1324 / lung cancer/MER50	-	4790	GE	MER50like	NM_001291744/-/['IntOGen']	NM_001291744/22941188/['COSMIC']
Canon	Q96HQ0	ZNF419	19	58004403	439	C	A	147	Q	K	-	DOID:3953 / adrenal gland cancer/MER50	-	4790	GE	MER50like	NM_001098493/-/['TCGA']
Canon	Q96HQ0	ZNF419	19	58004403	442	C	A	148	Q	K	-	DOID:3953 / adrenal gland cancer/MER50	-	4790	GE	MER50like	NM_001098492/-/['TCGA']
Canon	Q96HQ0	ZNF419	19	58004403	214	C	A	72	Q	K	-	DOID:3953 / adrenal gland cancer/MER50	-	4790	GE	MER50like	NM_001291744/-/['TCGA']
Canon	Q96HQ0	ZNF419	19	58004403	343	C	A	115	Q	K	-	DOID:3953 / adrenal gland cancer/MER50	-	4790	GE	MER50like	NM_001098495/-/['TCGA']
Canon	Q96HQ0	ZNF419	19	58004403	379	C	A	127	Q	K	-	DOID:3953 / adrenal gland cancer/MER50	-	4790	GE	MER50like	NM_001291743/-/['TCGA']
Canon	Q96HQ0	ZNF419	19	58004403	478	C	A	160	Q	K	-	DOID:3953 / adrenal gland cancer/MER50	Gain|Phosphorylation	4790	GE	MER50like	NM_024691/-/['TCGA']
Canon	Q96HQ0	ZNF419	19	58004403	382	C	A	128	Q	K	-	DOID:3953 / adrenal gland cancer/MER50	-	4790	GE	MER50like	NM_001098494/-/['TCGA']
Canon	Q96HQ0	ZNF419	19	58004403	481	C	A	161	Q	K	-	DOID:3953 / adrenal gland cancer/MER50	-	4790	GE	MER50like	NM_001098491/-/['TCGA']
Canon	Q96HQ0	ZNF419	19	58004403	340	C	A	114	Q	K	-	DOID:3953 / adrenal gland cancer/MER50	-	4790	GE	MER50like	NM_001098496/-/['TCGA']
Canon	Q96HQ0	ZNF419	19	58004449	386	T	C	129	L	P	benign	DOID:10534 / stomach cancer/MER50	-	4790	GE	MER50like	NM_001098496/-/['ICGC', 'TCGA']
Canon	Q96HQ0	ZNF419	19	58004449	524	T	C	175	L	P	benign	DOID:10534 / stomach cancer/MER50	-	4790	GE	MER50like	NM_024691/-/['ICGC', 'TCGA']
Canon	Q96HQ0	ZNF419	19	58004449	425	T	C	142	L	P	benign	DOID:10534 / stomach cancer/MER50	-	4790	GE	MER50like	NM_001291743/-/['ICGC', 'TCGA']
Canon	Q96HQ0	ZNF419	19	58004449	260	T	C	87	L	P	benign	DOID:10534 / stomach cancer/MER50	-	4790	GE	MER50like	NM_001291744/-/['ICGC', 'TCGA']
Canon	Q96HQ0	ZNF419	19	58004449	428	T	C	143	L	P	benign	DOID:10534 / stomach cancer/MER50	-	4790	GE	MER50like	NM_001098494/-/['ICGC', 'TCGA']
Canon	Q96HQ0	ZNF419	19	58004449	485	T	C	162	L	P	benign	DOID:10534 / stomach cancer/MER50	-	4790	GE	MER50like	NM_001098493/-/['ICGC', 'TCGA']
Canon	Q96HQ0	ZNF419	19	58004449	488	T	C	163	L	P	benign	DOID:10534 / stomach cancer/MER50	-	4790	GE	MER50like	NM_001098492/-/['ICGC', 'TCGA']
Canon	Q96HQ0	ZNF419	19	58004449	389	T	C	130	L	P	benign	DOID:10534 / stomach cancer/MER50	-	4790	GE	MER50like	NM_001098495/-/['ICGC', 'TCGA']
Canon	Q96HQ0	ZNF419	19	58004449	527	T	C	176	L	P	benign	DOID:10534 / stomach cancer/MER50	-	4790	GE	MER50like	NM_001098491/-/['ICGC', 'TCGA']
Canon	Q96HQ0	ZNF419	19	58004475	511	G	C	171	E	Q	possibly damaging	DOID:4362 / cervical cancer/MER50	-	4790	GE	MER50like	NM_001098493/-/['TCGA']
Canon	Q96HQ0	ZNF419	19	58004475	451	G	C	151	E	Q	possibly damaging	DOID:4362 / cervical cancer/MER50	-	4790	GE	MER50like	NM_001291743/-/['TCGA']
Canon	Q96HQ0	ZNF419	19	58004475	415	G	C	139	E	Q	possibly damaging	DOID:4362 / cervical cancer/MER50	-	4790	GE	MER50like	NM_001098495/-/['TCGA']
Canon	Q96HQ0	ZNF419	19	58004475	553	G	C	185	E	Q	possibly damaging	DOID:4362 / cervical cancer/MER50	-	4790	GE	MER50like	NM_001098491/-/['TCGA']
Canon	Q96HQ0	ZNF419	19	58004475	454	G	C	152	E	Q	possibly damaging	DOID:4362 / cervical cancer/MER50	-	4790	GE	MER50like	NM_001098494/-/['TCGA']
Canon	Q96HQ0	ZNF419	19	58004475	550	G	C	184	E	Q	possibly damaging	DOID:4362 / cervical cancer/MER50	-	4790	GE	MER50like	NM_024691/-/['TCGA']
Canon	Q96HQ0	ZNF419	19	58004475	412	G	C	138	E	Q	possibly damaging	DOID:4362 / cervical cancer/MER50	-	4790	GE	MER50like	NM_001098496/-/['TCGA']
Canon	Q96HQ0	ZNF419	19	58004475	514	G	C	172	E	Q	possibly damaging	DOID:4362 / cervical cancer/MER50	-	4790	GE	MER50like	NM_001098492/-/['TCGA']
Canon	Q96HQ0	ZNF419	19	58004475	286	G	C	96	E	Q	possibly damaging	DOID:4362 / cervical cancer/MER50	-	4790	GE	MER50like	NM_001291744/-/['TCGA']
Canon	Q96HQ0	ZNF419	19	58004477	516	G	T	172	E	D	benign	DOID:1993 / rectum cancer/MER50	-	4790	GE	MER50like	NM_001098492/22810696/['COSMIC']
Canon	Q96HQ0	ZNF419	19	58004477	456	G	T	152	E	D	benign	DOID:1993 / rectum cancer/MER50	-	4790	GE	MER50like	NM_001098494/22810696/['COSMIC']
Canon	Q96HQ0	ZNF419	19	58004477	552	G	T	184	E	D	benign	DOID:1993 / rectum cancer/MER50	-	4790	GE	MER50like	NM_024691/22810696/['COSMIC']
Canon	Q96HQ0	ZNF419	19	58004477	555	G	T	185	E	D	benign	DOID:1993 / rectum cancer/MER50	-	4790	GE	MER50like	NM_001098491/22810696/['COSMIC']
Canon	Q96HQ0	ZNF419	19	58004477	414	G	T	138	E	D	benign	DOID:1993 / rectum cancer/MER50	-	4790	GE	MER50like	NM_001098496/22810696/['COSMIC']
Canon	Q96HQ0	ZNF419	19	58004477	513	G	T	171	E	D	benign	DOID:1993 / rectum cancer/MER50	-	4790	GE	MER50like	NM_001098493/22810696/['COSMIC']
Canon	Q96HQ0	ZNF419	19	58004477	417	G	T	139	E	D	benign	DOID:1993 / rectum cancer/MER50	-	4790	GE	MER50like	NM_001098495/22810696/['COSMIC']
Canon	Q96HQ0	ZNF419	19	58004477	453	G	T	151	E	D	benign	DOID:1993 / rectum cancer/MER50	-	4790	GE	MER50like	NM_001291743/22810696/['COSMIC']
Canon	Q96HQ0	ZNF419	19	58004477	288	G	T	96	E	D	benign	DOID:1993 / rectum cancer/MER50	-	4790	GE	MER50like	NM_001291744/22810696/['COSMIC']
Canon	Q96HQ0	ZNF419	19	58004500	440	G	A	147	S	N	probably damaging	DOID:4159 / skin cancer/MER50	-	4790	GE	MER50like	NM_001098495/-/['ICGC', 'TCGA']
Canon	Q96HQ0	ZNF419	19	58004500	311	G	A	104	S	N	probably damaging	DOID:4159 / skin cancer/MER50	-	4790	GE	MER50like	NM_001291744/-/['ICGC', 'TCGA']
Canon	Q96HQ0	ZNF419	19	58004500	575	G	A	192	S	N	probably damaging	DOID:4159 / skin cancer/MER50	-	4790	GE	MER50like	NM_024691/-/['ICGC', 'TCGA']
Canon	Q96HQ0	ZNF419	19	58004500	437	G	A	146	S	N	probably damaging	DOID:4159 / skin cancer/MER50	-	4790	GE	MER50like	NM_001098496/-/['ICGC', 'TCGA']
Canon	Q96HQ0	ZNF419	19	58004500	539	G	A	180	S	N	probably damaging	DOID:4159 / skin cancer/MER50	-	4790	GE	MER50like	NM_001098492/-/['ICGC', 'TCGA']
Canon	Q96HQ0	ZNF419	19	58004500	536	G	A	179	S	N	probably damaging	DOID:4159 / skin cancer/MER50	-	4790	GE	MER50like	NM_001098493/-/['ICGC', 'TCGA']
Canon	Q96HQ0	ZNF419	19	58004500	578	G	A	193	S	N	probably damaging	DOID:4159 / skin cancer/MER50	-	4790	GE	MER50like	NM_001098491/-/['ICGC', 'TCGA']
Canon	Q96HQ0	ZNF419	19	58004500	476	G	A	159	S	N	probably damaging	DOID:4159 / skin cancer/MER50	-	4790	GE	MER50like	NM_001291743/-/['ICGC', 'TCGA']
Canon	Q96HQ0	ZNF419	19	58004500	479	G	A	160	S	N	probably damaging	DOID:4159 / skin cancer/MER50	-	4790	GE	MER50like	NM_001098494/-/['ICGC', 'TCGA']
Canon	Q96HQ0	ZNF419	19	58004507	447	G	T	149	E	D	probably damaging	DOID:1324 / lung cancer/MER50	-	4790	GE	MER50like	NM_001098495/-/['COSMIC']
Canon	Q96HQ0	ZNF419	19	58004507	486	G	T	162	E	D	probably damaging	DOID:1324 / lung cancer/MER50	-	4790	GE	MER50like	NM_001098494/-/['COSMIC']
Canon	Q96HQ0	ZNF419	19	58004507	543	G	T	181	E	D	probably damaging	DOID:1324 / lung cancer/MER50	-	4790	GE	MER50like	NM_001098493/-/['COSMIC']
Canon	Q96HQ0	ZNF419	19	58004507	546	G	T	182	E	D	probably damaging	DOID:1324 / lung cancer/MER50	-	4790	GE	MER50like	NM_001098492/-/['COSMIC']
Canon	Q96HQ0	ZNF419	19	58004507	585	G	T	195	E	D	probably damaging	DOID:1324 / lung cancer/MER50	-	4790	GE	MER50like	NM_001098491/-/['COSMIC']
Canon	Q96HQ0	ZNF419	19	58004507	444	G	T	148	E	D	probably damaging	DOID:1324 / lung cancer/MER50	-	4790	GE	MER50like	NM_001098496/-/['COSMIC']
Canon	Q96HQ0	ZNF419	19	58004507	483	G	T	161	E	D	probably damaging	DOID:1324 / lung cancer/MER50	-	4790	GE	MER50like	NM_001291743/-/['COSMIC']
Canon	Q96HQ0	ZNF419	19	58004507	582	G	T	194	E	D	probably damaging	DOID:1324 / lung cancer/MER50	Gain|Phosphorylation	4790	GE	MER50like	NM_024691/-/['COSMIC']
Canon	Q96HQ0	ZNF419	19	58004507	318	G	T	106	E	D	probably damaging	DOID:1324 / lung cancer/MER50	-	4790	GE	MER50like	NM_001291744/-/['COSMIC']
Canon	Q96HQ0	ZNF419	19	58004570	507	A	C	169	K	N	benign	DOID:263 / kidney cancer/MER50	-	4790	GE	MER50like	NM_001098496/-/['TCGA']
Canon	Q96HQ0	ZNF419	19	58004570	381	A	C	127	K	N	benign	DOID:263 / kidney cancer/MER50	-	4790	GE	MER50like	NM_001291744/-/['TCGA']
Canon	Q96HQ0	ZNF419	19	58004570	648	A	C	216	K	N	benign	DOID:263 / kidney cancer/MER50	-	4790	GE	MER50like	NM_001098491/-/['TCGA']
Canon	Q96HQ0	ZNF419	19	58004570	606	A	C	202	K	N	benign	DOID:263 / kidney cancer/MER50	-	4790	GE	MER50like	NM_001098493/-/['TCGA']
Canon	Q96HQ0	ZNF419	19	58004570	546	A	C	182	K	N	benign	DOID:263 / kidney cancer/MER50	-	4790	GE	MER50like	NM_001291743/-/['TCGA']
Canon	Q96HQ0	ZNF419	19	58004570	510	A	C	170	K	N	benign	DOID:263 / kidney cancer/MER50	-	4790	GE	MER50like	NM_001098495/-/['TCGA']
Canon	Q96HQ0	ZNF419	19	58004570	645	A	C	215	K	N	benign	DOID:263 / kidney cancer/MER50	-	4790	GE	MER50like	NM_024691/-/['TCGA']
Canon	Q96HQ0	ZNF419	19	58004570	549	A	C	183	K	N	benign	DOID:263 / kidney cancer/MER50	-	4790	GE	MER50like	NM_001098494/-/['TCGA']
Canon	Q96HQ0	ZNF419	19	58004570	609	A	C	203	K	N	benign	DOID:263 / kidney cancer/MER50	-	4790	GE	MER50like	NM_001098492/-/['TCGA']
Canon	Q96HQ0	ZNF419	19	58004572	551	A	G	184	Y	C	probably damaging	DOID:11054 / urinary bladder cancer/MER50	-	4790	GE	MER50like	NM_001098494/24121792/['COSMIC']	NM_001098494/-/['COSMIC', 'ICGC']
Canon	Q96HQ0	ZNF419	19	58004572	608	A	G	203	Y	C	probably damaging	DOID:11054 / urinary bladder cancer/MER50	-	4790	GE	MER50like	NM_001098493/-/['COSMIC', 'ICGC']	NM_001098493/24121792/['COSMIC']
Canon	Q96HQ0	ZNF419	19	58004572	383	A	G	128	Y	C	probably damaging	DOID:11054 / urinary bladder cancer/MER50	-	4790	GE	MER50like	NM_001291744/24121792/['COSMIC']	NM_001291744/-/['COSMIC', 'ICGC']
Canon	Q96HQ0	ZNF419	19	58004572	512	A	G	171	Y	C	probably damaging	DOID:11054 / urinary bladder cancer/MER50	-	4790	GE	MER50like	NM_001098495/24121792/['COSMIC']	NM_001098495/-/['COSMIC', 'ICGC']
Canon	Q96HQ0	ZNF419	19	58004572	611	A	G	204	Y	C	probably damaging	DOID:11054 / urinary bladder cancer/MER50	-	4790	GE	MER50like	NM_001098492/24121792/['COSMIC']	NM_001098492/-/['COSMIC', 'ICGC']
Canon	Q96HQ0	ZNF419	19	58004572	650	A	G	217	Y	C	probably damaging	DOID:11054 / urinary bladder cancer/MER50	-	4790	GE	MER50like	NM_001098491/24121792/['COSMIC']	NM_001098491/-/['COSMIC', 'ICGC']
Canon	Q96HQ0	ZNF419	19	58004572	509	A	G	170	Y	C	probably damaging	DOID:11054 / urinary bladder cancer/MER50	-	4790	GE	MER50like	NM_001098496/24121792/['COSMIC']	NM_001098496/-/['COSMIC', 'ICGC']
Canon	Q96HQ0	ZNF419	19	58004572	647	A	G	216	Y	C	probably damaging	DOID:11054 / urinary bladder cancer/MER50	-	4790	GE	MER50like	NM_024691/24121792/['COSMIC']	NM_024691/-/['COSMIC', 'ICGC']
Canon	Q96HQ0	ZNF419	19	58004572	548	A	G	183	Y	C	probably damaging	DOID:11054 / urinary bladder cancer/MER50	-	4790	GE	MER50like	NM_001291743/-/['COSMIC', 'ICGC']	NM_001291743/24121792/['COSMIC']
Canon	Q96HQ0	ZNF419	19	58004583	562	C	A	188	Q	K	probably damaging	DOID:1793 / pancreatic cancer/MER50	-	4790	GE	MER50like	NM_001098494/-/['TCGA']
Canon	Q96HQ0	ZNF419	19	58004583	661	C	A	221	Q	K	probably damaging	DOID:1793 / pancreatic cancer/MER50	-	4790	GE	MER50like	NM_001098491/-/['TCGA']
Canon	Q96HQ0	ZNF419	19	58004583	523	C	A	175	Q	K	probably damaging	DOID:1793 / pancreatic cancer/MER50	-	4790	GE	MER50like	NM_001098495/-/['TCGA']
Canon	Q96HQ0	ZNF419	19	58004583	520	C	A	174	Q	K	probably damaging	DOID:1793 / pancreatic cancer/MER50	-	4790	GE	MER50like	NM_001098496/-/['TCGA']
Canon	Q96HQ0	ZNF419	19	58004583	559	C	A	187	Q	K	probably damaging	DOID:1793 / pancreatic cancer/MER50	-	4790	GE	MER50like	NM_001291743/-/['TCGA']
Canon	Q96HQ0	ZNF419	19	58004583	394	C	A	132	Q	K	probably damaging	DOID:1793 / pancreatic cancer/MER50	-	4790	GE	MER50like	NM_001291744/-/['TCGA']
Canon	Q96HQ0	ZNF419	19	58004583	658	C	A	220	Q	K	probably damaging	DOID:1793 / pancreatic cancer/MER50	-	4790	GE	MER50like	NM_024691/-/['TCGA']
Canon	Q96HQ0	ZNF419	19	58004583	619	C	A	207	Q	K	probably damaging	DOID:1793 / pancreatic cancer/MER50	-	4790	GE	MER50like	NM_001098493/-/['TCGA']
Canon	Q96HQ0	ZNF419	19	58004583	622	C	A	208	Q	K	probably damaging	DOID:1793 / pancreatic cancer/MER50	-	4790	GE	MER50like	NM_001098492/-/['TCGA']
Canon	Q96HQ0	ZNF419	19	58004619	595	G	T	199	E	X	-	DOID:1319 / brain cancer/MER50	-	4790	GE	MER50like	NM_001291743/22820256/['COSMIC']
Canon	Q96HQ0	ZNF419	19	58004619	697	G	T	233	E	X	-	DOID:1319 / brain cancer/MER50	-	4790	GE	MER50like	NM_001098491/22820256/['COSMIC']
Canon	Q96HQ0	ZNF419	19	58004619	559	G	T	187	E	X	-	DOID:1319 / brain cancer/MER50	-	4790	GE	MER50like	NM_001098495/22820256/['COSMIC']
Canon	Q96HQ0	ZNF419	19	58004619	598	G	T	200	E	X	-	DOID:1319 / brain cancer/MER50	-	4790	GE	MER50like	NM_001098494/22820256/['COSMIC']
Canon	Q96HQ0	ZNF419	19	58004619	430	G	T	144	E	X	-	DOID:1319 / brain cancer/MER50	-	4790	GE	MER50like	NM_001291744/22820256/['COSMIC']
Canon	Q96HQ0	ZNF419	19	58004619	556	G	T	186	E	X	-	DOID:1319 / brain cancer/MER50	-	4790	GE	MER50like	NM_001098496/22820256/['COSMIC']
Canon	Q96HQ0	ZNF419	19	58004619	658	G	T	220	E	X	-	DOID:1319 / brain cancer/MER50	-	4790	GE	MER50like	NM_001098492/22820256/['COSMIC']
Canon	Q96HQ0	ZNF419	19	58004619	655	G	T	219	E	X	-	DOID:1319 / brain cancer/MER50	-	4790	GE	MER50like	NM_001098493/22820256/['COSMIC']
Canon	Q96HQ0	ZNF419	19	58004619	694	G	T	232	E	X	-	DOID:1319 / brain cancer/MER50	-	4790	GE	MER50like	NM_024691/22820256/['COSMIC']
Canon	Q96HQ0	ZNF419	19	58004725	701	C	T	234	S	F	probably damaging	DOID:1521 / cecum cancer/MER50	-	4790	GE	MER50like	NM_001291743/-/['COSMIC']
Canon	Q96HQ0	ZNF419	19	58004725	704	C	T	235	S	F	probably damaging	DOID:1521 / cecum cancer/MER50	-	4790	GE	MER50like	NM_001098494/-/['COSMIC']
Canon	Q96HQ0	ZNF419	19	58004725	761	C	T	254	S	F	probably damaging	DOID:1521 / cecum cancer/MER50	-	4790	GE	MER50like	NM_001098493/-/['COSMIC']
Canon	Q96HQ0	ZNF419	19	58004725	665	C	T	222	S	F	probably damaging	DOID:1521 / cecum cancer/MER50	-	4790	GE	MER50like	NM_001098495/-/['COSMIC']
Canon	Q96HQ0	ZNF419	19	58004725	803	C	T	268	S	F	probably damaging	DOID:1521 / cecum cancer/MER50	-	4790	GE	MER50like	NM_001098491/-/['COSMIC']
Canon	Q96HQ0	ZNF419	19	58004725	662	C	T	221	S	F	probably damaging	DOID:1521 / cecum cancer/MER50	-	4790	GE	MER50like	NM_001098496/-/['COSMIC']
Canon	Q96HQ0	ZNF419	19	58004725	800	C	T	267	S	F	probably damaging	DOID:1521 / cecum cancer/MER50	-	4790	GE	MER50like	NM_024691/-/['COSMIC']
Canon	Q96HQ0	ZNF419	19	58004725	536	C	T	179	S	F	probably damaging	DOID:1521 / cecum cancer/MER50	-	4790	GE	MER50like	NM_001291744/-/['COSMIC']
Canon	Q96HQ0	ZNF419	19	58004725	764	C	T	255	S	F	probably damaging	DOID:1521 / cecum cancer/MER50	-	4790	GE	MER50like	NM_001098492/-/['COSMIC']
Canon	Q96HQ0	ZNF419	19	58004734	770	G	A	257	R	H	probably damaging	DOID:10534 / stomach cancer/MER50	-	4790	GE	MER50like	NM_001098493/-/['ICGC', 'TCGA']
Canon	Q96HQ0	ZNF419	19	58004734	773	G	A	258	R	H	probably damaging	DOID:10534 / stomach cancer/MER50	-	4790	GE	MER50like	NM_001098492/-/['ICGC', 'TCGA']
Canon	Q96HQ0	ZNF419	19	58004734	674	G	A	225	R	H	probably damaging	DOID:10534 / stomach cancer/MER50	-	4790	GE	MER50like	NM_001098495/-/['ICGC', 'TCGA']
Canon	Q96HQ0	ZNF419	19	58004734	713	G	A	238	R	H	probably damaging	DOID:10534 / stomach cancer/MER50	-	4790	GE	MER50like	NM_001098494/-/['ICGC', 'TCGA']
Canon	Q96HQ0	ZNF419	19	58004734	812	G	A	271	R	H	probably damaging	DOID:10534 / stomach cancer/MER50	-	4790	GE	MER50like	NM_001098491/-/['ICGC', 'TCGA']
Canon	Q96HQ0	ZNF419	19	58004734	809	G	A	270	R	H	probably damaging	DOID:10534 / stomach cancer/MER50	-	4790	GE	MER50like	NM_024691/-/['ICGC', 'TCGA']
Canon	Q96HQ0	ZNF419	19	58004734	545	G	A	182	R	H	probably damaging	DOID:10534 / stomach cancer/MER50	-	4790	GE	MER50like	NM_001291744/-/['ICGC', 'TCGA']
Canon	Q96HQ0	ZNF419	19	58004734	671	G	A	224	R	H	probably damaging	DOID:10534 / stomach cancer/MER50	-	4790	GE	MER50like	NM_001098496/-/['ICGC', 'TCGA']
Canon	Q96HQ0	ZNF419	19	58004734	710	G	A	237	R	H	probably damaging	DOID:10534 / stomach cancer/MER50	-	4790	GE	MER50like	NM_001291743/-/['ICGC', 'TCGA']
Canon	Q96HQ0	ZNF419	19	58004751	730	G	A	244	E	K	benign	DOID:1793 / pancreatic cancer/MER50	-	4790	GE	MER50like	NM_001098494/-/['TCGA']
Canon	Q96HQ0	ZNF419	19	58004751	826	G	A	276	E	K	benign	DOID:1793 / pancreatic cancer/MER50	-	4790	GE	MER50like	NM_024691/-/['TCGA']
Canon	Q96HQ0	ZNF419	19	58004751	688	G	A	230	E	K	benign	DOID:1793 / pancreatic cancer/MER50	-	4790	GE	MER50like	NM_001098496/-/['TCGA']
Canon	Q96HQ0	ZNF419	19	58004751	787	G	A	263	E	K	benign	DOID:1793 / pancreatic cancer/MER50	-	4790	GE	MER50like	NM_001098493/-/['TCGA']
Canon	Q96HQ0	ZNF419	19	58004751	727	G	A	243	E	K	benign	DOID:1793 / pancreatic cancer/MER50	-	4790	GE	MER50like	NM_001291743/-/['TCGA']
Canon	Q96HQ0	ZNF419	19	58004751	691	G	A	231	E	K	benign	DOID:1793 / pancreatic cancer/MER50	-	4790	GE	MER50like	NM_001098495/-/['TCGA']
Canon	Q96HQ0	ZNF419	19	58004751	790	G	A	264	E	K	benign	DOID:1793 / pancreatic cancer/MER50	-	4790	GE	MER50like	NM_001098492/-/['TCGA']
Canon	Q96HQ0	ZNF419	19	58004751	562	G	A	188	E	K	benign	DOID:1793 / pancreatic cancer/MER50	-	4790	GE	MER50like	NM_001291744/-/['TCGA']
Canon	Q96HQ0	ZNF419	19	58004751	829	G	A	277	E	K	benign	DOID:1793 / pancreatic cancer/MER50	-	4790	GE	MER50like	NM_001098491/-/['TCGA']
Canon	Q96HQ0	ZNF419	19	58004751	829	G	C	277	E	Q	benign	DOID:1192 / peripheral nervous system neoplasm/MER50	-	4790	GE	MER50like	NM_001098491/23334666/['COSMIC']
Canon	Q96HQ0	ZNF419	19	58004751	730	G	C	244	E	Q	benign	DOID:1192 / peripheral nervous system neoplasm/MER50	-	4790	GE	MER50like	NM_001098494/23334666/['COSMIC']
Canon	Q96HQ0	ZNF419	19	58004751	688	G	C	230	E	Q	benign	DOID:1192 / peripheral nervous system neoplasm/MER50	-	4790	GE	MER50like	NM_001098496/23334666/['COSMIC']
Canon	Q96HQ0	ZNF419	19	58004751	727	G	C	243	E	Q	benign	DOID:1192 / peripheral nervous system neoplasm/MER50	-	4790	GE	MER50like	NM_001291743/23334666/['COSMIC']
Canon	Q96HQ0	ZNF419	19	58004751	562	G	C	188	E	Q	benign	DOID:1192 / peripheral nervous system neoplasm/MER50	-	4790	GE	MER50like	NM_001291744/23334666/['COSMIC']
Canon	Q96HQ0	ZNF419	19	58004751	826	G	C	276	E	Q	benign	DOID:1192 / peripheral nervous system neoplasm/MER50	-	4790	GE	MER50like	NM_024691/23334666/['COSMIC']
Canon	Q96HQ0	ZNF419	19	58004751	787	G	C	263	E	Q	benign	DOID:1192 / peripheral nervous system neoplasm/MER50	-	4790	GE	MER50like	NM_001098493/23334666/['COSMIC']
Canon	Q96HQ0	ZNF419	19	58004751	790	G	C	264	E	Q	benign	DOID:1192 / peripheral nervous system neoplasm/MER50	-	4790	GE	MER50like	NM_001098492/23334666/['COSMIC']
Canon	Q96HQ0	ZNF419	19	58004751	691	G	C	231	E	Q	benign	DOID:1192 / peripheral nervous system neoplasm/MER50	-	4790	GE	MER50like	NM_001098495/23334666/['COSMIC']
Canon	Q96HQ0	ZNF419	19	58004770	845	C	G	282	T	S	probably damaging	DOID:219 / colon cancer/MER50	Gain|Phosphorylation	4790	GE	MER50like	NM_024691/-/['ICGC', 'TCGA']
Canon	Q96HQ0	ZNF419	19	58004770	707	C	G	236	T	S	probably damaging	DOID:219 / colon cancer/MER50	-	4790	GE	MER50like	NM_001098496/-/['ICGC', 'TCGA']
Canon	Q96HQ0	ZNF419	19	58004770	581	C	G	194	T	S	probably damaging	DOID:219 / colon cancer/MER50	-	4790	GE	MER50like	NM_001291744/-/['ICGC', 'TCGA']
Canon	Q96HQ0	ZNF419	19	58004770	710	C	G	237	T	S	probably damaging	DOID:219 / colon cancer/MER50	-	4790	GE	MER50like	NM_001098495/-/['ICGC', 'TCGA']
Canon	Q96HQ0	ZNF419	19	58004770	806	C	G	269	T	S	probably damaging	DOID:219 / colon cancer/MER50	-	4790	GE	MER50like	NM_001098493/-/['ICGC', 'TCGA']
Canon	Q96HQ0	ZNF419	19	58004770	809	C	G	270	T	S	probably damaging	DOID:219 / colon cancer/MER50	-	4790	GE	MER50like	NM_001098492/-/['ICGC', 'TCGA']
Canon	Q96HQ0	ZNF419	19	58004770	749	C	G	250	T	S	probably damaging	DOID:219 / colon cancer/MER50	-	4790	GE	MER50like	NM_001098494/-/['ICGC', 'TCGA']
Canon	Q96HQ0	ZNF419	19	58004770	848	C	G	283	T	S	probably damaging	DOID:219 / colon cancer/MER50	-	4790	GE	MER50like	NM_001098491/-/['ICGC', 'TCGA']
Canon	Q96HQ0	ZNF419	19	58004770	746	C	G	249	T	S	probably damaging	DOID:219 / colon cancer/MER50	-	4790	GE	MER50like	NM_001291743/-/['ICGC', 'TCGA']
Canon	Q96HQ0	ZNF419	19	58004770	710	C	G	237	T	S	probably damaging	DOID:1521 / cecum cancer/MER50	-	4790	GE	MER50like	NM_001098495/-/['COSMIC']
Canon	Q96HQ0	ZNF419	19	58004770	707	C	G	236	T	S	probably damaging	DOID:1521 / cecum cancer/MER50	-	4790	GE	MER50like	NM_001098496/-/['COSMIC']
Canon	Q96HQ0	ZNF419	19	58004770	806	C	G	269	T	S	probably damaging	DOID:1521 / cecum cancer/MER50	-	4790	GE	MER50like	NM_001098493/-/['COSMIC']
Canon	Q96HQ0	ZNF419	19	58004770	749	C	G	250	T	S	probably damaging	DOID:1521 / cecum cancer/MER50	-	4790	GE	MER50like	NM_001098494/-/['COSMIC']
Canon	Q96HQ0	ZNF419	19	58004770	809	C	G	270	T	S	probably damaging	DOID:1521 / cecum cancer/MER50	-	4790	GE	MER50like	NM_001098492/-/['COSMIC']
Canon	Q96HQ0	ZNF419	19	58004770	746	C	G	249	T	S	probably damaging	DOID:1521 / cecum cancer/MER50	-	4790	GE	MER50like	NM_001291743/-/['COSMIC']
Canon	Q96HQ0	ZNF419	19	58004770	848	C	G	283	T	S	probably damaging	DOID:1521 / cecum cancer/MER50	-	4790	GE	MER50like	NM_001098491/-/['COSMIC']
Canon	Q96HQ0	ZNF419	19	58004770	845	C	G	282	T	S	probably damaging	DOID:1521 / cecum cancer/MER50	Gain|Phosphorylation	4790	GE	MER50like	NM_024691/-/['COSMIC']
Canon	Q96HQ0	ZNF419	19	58004770	581	C	G	194	T	S	probably damaging	DOID:1521 / cecum cancer/MER50	-	4790	GE	MER50like	NM_001291744/-/['COSMIC']
Canon	Q96HQ0	ZNF419	19	58004803	614	G	A	205	G	E	probably damaging	DOID:1793 / pancreatic cancer/MER50	-	4790	GE	MER50like	NM_001291744/-/['TCGA']
Canon	Q96HQ0	ZNF419	19	58004803	782	G	A	261	G	E	probably damaging	DOID:1793 / pancreatic cancer/MER50	-	4790	GE	MER50like	NM_001098494/-/['TCGA']
Canon	Q96HQ0	ZNF419	19	58004803	740	G	A	247	G	E	probably damaging	DOID:1793 / pancreatic cancer/MER50	-	4790	GE	MER50like	NM_001098496/-/['TCGA']
Canon	Q96HQ0	ZNF419	19	58004803	839	G	A	280	G	E	probably damaging	DOID:1793 / pancreatic cancer/MER50	-	4790	GE	MER50like	NM_001098493/-/['TCGA']
Canon	Q96HQ0	ZNF419	19	58004803	779	G	A	260	G	E	probably damaging	DOID:1793 / pancreatic cancer/MER50	-	4790	GE	MER50like	NM_001291743/-/['TCGA']
Canon	Q96HQ0	ZNF419	19	58004803	881	G	A	294	G	E	probably damaging	DOID:1793 / pancreatic cancer/MER50	-	4790	GE	MER50like	NM_001098491/-/['TCGA']
Canon	Q96HQ0	ZNF419	19	58004803	842	G	A	281	G	E	probably damaging	DOID:1793 / pancreatic cancer/MER50	-	4790	GE	MER50like	NM_001098492/-/['TCGA']
Canon	Q96HQ0	ZNF419	19	58004803	743	G	A	248	G	E	probably damaging	DOID:1793 / pancreatic cancer/MER50	-	4790	GE	MER50like	NM_001098495/-/['TCGA']
Canon	Q96HQ0	ZNF419	19	58004803	878	G	A	293	G	E	probably damaging	DOID:1793 / pancreatic cancer/MER50	Gain|Phosphorylation	4790	GE	MER50like	NM_024691/-/['TCGA']
Canon	Q96HQ0	ZNF419	19	58004813	750	C	G	250	F	L	probably damaging	DOID:4362 / cervical cancer/MER50	-	4790	GE	MER50like	NM_001098496/-/['TCGA']
Canon	Q96HQ0	ZNF419	19	58004813	849	C	G	283	F	L	probably damaging	DOID:4362 / cervical cancer/MER50	-	4790	GE	MER50like	NM_001098493/-/['TCGA']
Canon	Q96HQ0	ZNF419	19	58004813	792	C	G	264	F	L	probably damaging	DOID:4362 / cervical cancer/MER50	-	4790	GE	MER50like	NM_001098494/-/['TCGA']
Canon	Q96HQ0	ZNF419	19	58004813	789	C	G	263	F	L	probably damaging	DOID:4362 / cervical cancer/MER50	-	4790	GE	MER50like	NM_001291743/-/['TCGA']
Canon	Q96HQ0	ZNF419	19	58004813	891	C	G	297	F	L	probably damaging	DOID:4362 / cervical cancer/MER50	-	4790	GE	MER50like	NM_001098491/-/['TCGA']
Canon	Q96HQ0	ZNF419	19	58004813	888	C	G	296	F	L	probably damaging	DOID:4362 / cervical cancer/MER50	-	4790	GE	MER50like	NM_024691/-/['TCGA']
Canon	Q96HQ0	ZNF419	19	58004813	753	C	G	251	F	L	probably damaging	DOID:4362 / cervical cancer/MER50	-	4790	GE	MER50like	NM_001098495/-/['TCGA']
Canon	Q96HQ0	ZNF419	19	58004813	852	C	G	284	F	L	probably damaging	DOID:4362 / cervical cancer/MER50	-	4790	GE	MER50like	NM_001098492/-/['TCGA']
Canon	Q96HQ0	ZNF419	19	58004813	624	C	G	208	F	L	probably damaging	DOID:4362 / cervical cancer/MER50	-	4790	GE	MER50like	NM_001291744/-/['TCGA']
[truncated: 544 more rows]
