# Supplementary material for: Investigation of somatic single nucleotide variations in human endogenous retrovirus elements and their potential association with cancer
Source: PLoS One. 2019 Apr 1;14(4):e0213770. doi: 10.1371/journal.pone.0213770 (PMC6443178; doi:10.1371/journal.pone.0213770)
Supplement: S7 Table — (XLSX) [file pone.0213770.s009.xlsx]

## Sheet: HERV_SNV_CLASS
HERV_sequence	Chrmosome	Genome_Pos	Ref_N	Var_N	DOID /Cancer type /HERV group	HERV Genus	HERV_id	Mutation_ID	Info_ICGC
Noncanon	1	831594	A	C	DOID:1793 / pancreatic cancer/HML3	AB	5803	MU14399301		intergenic_region
Noncanon	1	831657	A	T	DOID:2394 / ovarian cancer/HML3	AB	5803	MU5530576		intergenic_region
Noncanon	1	831669	A	T	DOID:3571 / liver cancer/HML3	AB	5803	MU53388019		intergenic_region
Noncanon	1	831812	G	T	DOID:3571 / liver cancer/HML3	AB	5803	MU40603126		intergenic_region
Noncanon	1	832478	C	T	DOID:1612 / breast cancer/HML3	AB	5803	MU67862340		intergenic_region
Noncanon	1	832486	C	T	DOID:4159 / skin cancer/HML3	AB	5803	MU50873432		intergenic_region
Noncanon	1	832638	C	T	DOID:4159 / skin cancer/HML3	AB	5803	MU47831869		intergenic_region
Noncanon	1	833223	C	T	DOID:219 / colon cancer/HML3	AB	5803	MU16202731		intergenic_region
Noncanon	1	833528	C	T	DOID:4159 / skin cancer/HML3	AB	5803	MU49763330		intergenic_region
Noncanon	1	833669	G	A	DOID:4159 / skin cancer/HML3	AB	5803	MU42245821		intergenic_region
Noncanon	1	1349797	T	G	DOID:5041 / esophageal cancer/HARLEQUIN	GE	5804	MU70039319		intergenic_region
Noncanon	1	1349822	C	T	DOID:4159 / skin cancer/HARLEQUIN	GE	5804	MU34437462		intergenic_region
Noncanon	1	1349994	A	G	DOID:263 / kidney cancer/HARLEQUIN	GE	5804	MU3901059		intergenic_region
Noncanon	1	1350859	C	T	DOID:4159 / skin cancer/HARLEQUIN	GE	5804	MU59644270		intergenic_region
Noncanon	1	1351186	G	A	DOID:4159 / skin cancer/HARLEQUIN	GE	5804	MU58593752		intergenic_region
Noncanon	1	1351596	C	T	DOID:4159 / skin cancer/HARLEQUIN	GE	5804	MU62395170		intergenic_region
Noncanon	1	1351867	T	C	DOID:4159 / skin cancer/HARLEQUIN	GE	5804	MU58796036		intergenic_region
Noncanon	1	1352445	A	T	DOID:4159 / skin cancer/HARLEQUIN	GE	5804	MU55759426		intergenic_region
Noncanon	1	1352679	G	A	DOID:4159 / skin cancer/HARLEQUIN	GE	5804	MU60902165		intergenic_region
Noncanon	1	1353056	T	C	DOID:4159 / skin cancer/HARLEQUIN	GE	5804	MU61880994		intergenic_region
Noncanon	1	1353139	C	T	DOID:4159 / skin cancer/HARLEQUIN	GE	5804	MU36239746		intergenic_region
Noncanon	1	1353239	C	G	DOID:4159 / skin cancer/HARLEQUIN	GE	5804	MU49761217		intergenic_region
Noncanon	1	1353858	C	T	DOID:4159 / skin cancer/HARLEQUIN	GE	5804	MU59344901	ANKRD65	3_prime_UTR_variant
Noncanon	1	1353975	C	T	DOID:219 / colon cancer/HARLEQUIN	GE	5804	MU63722215	ANKRD65	3_prime_UTR_variant
Noncanon	1	1354050	G	A	DOID:4159 / skin cancer/HARLEQUIN	GE	5804	MU46862508	ANKRD65	3_prime_UTR_variant
Noncanon	1	1354107	C	A	DOID:5041 / esophageal cancer/HARLEQUIN	GE	5804	MU371784	ANKRD65	3_prime_UTR_variant
Canon	1	3718477	C	G	DOID:1612 / breast cancer/HML4	AB	5807	MU64262988		intergenic_region
Canon	1	3719230	G	A	DOID:4159 / skin cancer/HML4	AB	5807	MU52733490		intergenic_region
Canon	1	3719242	G	A	DOID:4159 / skin cancer/HML4	AB	5807	MU39394220		intergenic_region
Canon	1	3719371	C	T	DOID:2531 / hematologic cancer/HML4	AB	5807	MU42508208		intergenic_region
Canon	1	3719603	G	A	DOID:4159 / skin cancer/HML4	AB	5807	MU60232562		intergenic_region
Canon	1	3719689	G	A	DOID:4159 / skin cancer/HML4	AB	5807	MU48851690		intergenic_region
Canon	1	3719846	C	A	DOID:2531 / hematologic cancer/HML4	AB	5807	MU1380408		intergenic_region
Canon	1	3719868	A	T	DOID:4159 / skin cancer/HML4	AB	5807	MU71244482		intergenic_region
Canon	1	3720075	G	T	DOID:5041 / esophageal cancer/HML4	AB	5807	MU27039340		intergenic_region
Canon	1	3720558	C	T	DOID:4159 / skin cancer/HML4	AB	5807	MU46765288		intergenic_region
Canon	1	3720818	G	C	DOID:1612 / breast cancer/HML4	AB	5807	MU66659225		intergenic_region
Canon	1	3722034	G	T	DOID:5041 / esophageal cancer/HML4	AB	5807	MU15107039		intergenic_region
Canon	1	3722074	A	G	DOID:5041 / esophageal cancer/HML4	AB	5807	MU18533539		intergenic_region
Canon	1	3722217	C	T	DOID:4159 / skin cancer/HML4	AB	5807	MU46182552		intergenic_region
Canon	1	3722354	C	T	DOID:4159 / skin cancer/HML4	AB	5807	MU50023873		intergenic_region
Canon	1	3722803	G	A	DOID:4159 / skin cancer/HML4	AB	5807	MU58973921		intergenic_region
Noncanon	1	4238598	C	T	DOID:4159 / skin cancer/HERVH	GE	5808	MU62500531		intergenic_region
Noncanon	1	4238612	T	C	DOID:1612 / breast cancer/HERVH	GE	5808	MU65458169		intergenic_region
Noncanon	1	4239178	G	A	DOID:4159 / skin cancer/HERVH	GE	5808	MU49118530		intergenic_region
Noncanon	1	4239488	G	C	DOID:2394 / ovarian cancer/HERVH	GE	5808	MU5319725		intergenic_region
Noncanon	1	4239524	G	A	DOID:4159 / skin cancer/HERVH	GE	5808	MU56594005		intergenic_region
Noncanon	1	4239643	C	T	DOID:4159 / skin cancer/HERVH	GE	5808	MU55589658		intergenic_region
Noncanon	1	4239710	A	G	DOID:4159 / skin cancer/HERVH	GE	5808	MU67485870		intergenic_region
Noncanon	1	4240025	C	T	DOID:1793 / pancreatic cancer/HERVH	GE	5808	COSN7220039	.	.
Noncanon	1	4240073	G	A	DOID:4159 / skin cancer/HERVH	GE	5808	MU50893425		intergenic_region
Noncanon	1	4240181	A	T	DOID:4159 / skin cancer/HERVH	GE	5808	MU44015870		intergenic_region
Noncanon	1	4240289	C	T	DOID:4159 / skin cancer/HERVH	GE	5808	MU57376110		intergenic_region
Noncanon	1	4240300	A	G	DOID:4159 / skin cancer/HERVH	GE	5808	MU58387837		intergenic_region
Noncanon	1	4240774	G	A	DOID:4159 / skin cancer/HERVH	GE	5808	MU37230356		intergenic_region
Noncanon	1	4240867	A	G	DOID:3571 / liver cancer/HERVH	GE	5808	MU3408261		intergenic_region
Noncanon	1	4241125	G	A	DOID:4159 / skin cancer/HERVH	GE	5808	MU45300840		intergenic_region
Noncanon	1	4241346	A	G	DOID:2531 / hematologic cancer/HERVH	GE	5808	MU69362162		intergenic_region
Noncanon	1	4241351	G	A	DOID:4159 / skin cancer/HERVH	GE	5808	MU45476289		intergenic_region
Noncanon	1	4241406	G	T	DOID:1612 / breast cancer/HERVH	GE	5808	COSN21287385	.	.
Noncanon	1	4241406	G	T	DOID:1612 / breast cancer/HERVH	GE	5808	MU66710389		intergenic_region
Noncanon	1	4241411	C	T	DOID:4159 / skin cancer/HERVH	GE	5808	MU60986337		intergenic_region
Noncanon	1	4241453	C	T	DOID:4159 / skin cancer/HERVH	GE	5808	MU51230840		intergenic_region
Noncanon	1	4241488	G	A	DOID:4159 / skin cancer/HERVH	GE	5808	MU43571159		intergenic_region
Noncanon	1	4241639	T	A	DOID:5041 / esophageal cancer/HERVH	GE	5808	MU28185845		intergenic_region
Noncanon	1	4241796	C	T	DOID:4159 / skin cancer/HERVH	GE	5808	MU59559317		intergenic_region
Noncanon	1	4241859	G	A	DOID:4159 / skin cancer/HERVH	GE	5808	MU45244997		intergenic_region
Noncanon	1	4241922	G	A	DOID:4159 / skin cancer/HERVH	GE	5808	MU41689386		intergenic_region
Noncanon	1	4242014	C	T	DOID:4159 / skin cancer/HERVH	GE	5808	MU43599142		intergenic_region
Noncanon	1	4242026	C	T	DOID:4159 / skin cancer/HERVH	GE	5808	MU67633782		intergenic_region
Noncanon	1	4242102	G	A	DOID:1612 / breast cancer/HERVH	GE	5808	MU63798810		intergenic_region
Noncanon	1	4242137	T	C	DOID:5041 / esophageal cancer/HERVH	GE	5808	MU24475351		intergenic_region
Noncanon	1	4242177	A	G	DOID:1793 / pancreatic cancer/HERVH	GE	5808	MU5629672		intergenic_region
Noncanon	1	4242177	A	C	DOID:5041 / esophageal cancer/HERVH	GE	5808	MU362958		intergenic_region
Noncanon	1	4242420	G	A	DOID:4159 / skin cancer/HERVH	GE	5808	MU50808481		intergenic_region
Noncanon	1	4242435	A	G	DOID:3571 / liver cancer/HERVH	GE	5808	MU28969296		intergenic_region
Noncanon	1	4242568	T	G	DOID:4159 / skin cancer/HERVH	GE	5808	MU46416559		intergenic_region
Noncanon	1	4242698	G	A	DOID:263 / kidney cancer/HERVH	GE	5808	MU4149298		intergenic_region
Noncanon	1	4242700	G	A	DOID:4159 / skin cancer/HERVH	GE	5808	MU58040414		intergenic_region
Noncanon	1	4242752	C	T	DOID:4159 / skin cancer/HERVH	GE	5808	MU51299829		intergenic_region
Noncanon	1	4242779	G	A	DOID:4159 / skin cancer/HERVH	GE	5808	MU58621418		intergenic_region
Noncanon	1	4242987	G	A	DOID:4159 / skin cancer/HERVH	GE	5808	MU62891582		intergenic_region
Noncanon	1	4243117	T	C	DOID:5041 / esophageal cancer/HERVH	GE	5808	MU28194120		intergenic_region
Noncanon	1	4243136	G	A	DOID:1793 / pancreatic cancer/HERVH	GE	5808	MU11426956		intergenic_region
Noncanon	1	4243294	G	A	DOID:4159 / skin cancer/HERVH	GE	5808	MU53724084		intergenic_region
Noncanon	1	4243303	G	T	DOID:4159 / skin cancer/HERVH	GE	5808	MU57604729		intergenic_region
Noncanon	1	4243536	G	A	DOID:4159 / skin cancer/HERVH	GE	5808	MU59861576		intergenic_region
Noncanon	1	4243640	G	C	DOID:263 / kidney cancer/HERVH	GE	5808	MU4174845		intergenic_region
Noncanon	1	4243778	C	T	DOID:4159 / skin cancer/HERVH	GE	5808	MU50783308		intergenic_region
Noncanon	1	4244021	T	C	DOID:4159 / skin cancer/HERVH	GE	5808	MU49255019		intergenic_region
Noncanon	1	4244183	G	A	DOID:4159 / skin cancer/HERVH	GE	5808	MU43573115		intergenic_region
Noncanon	1	4244229	G	A	DOID:4159 / skin cancer/HERVH	GE	5808	MU48832204		intergenic_region
Noncanon	1	4244669	C	T	DOID:2394 / ovarian cancer/HERVH	GE	5808	MU5320148		intergenic_region
Noncanon	1	4244857	G	T	DOID:3571 / liver cancer/HERVH	GE	5808	COSN6456562	.	SNP
Noncanon	1	4245001	G	A	DOID:1612 / breast cancer/HERVH	GE	5808	MU64895242		intergenic_region
Noncanon	1	4245033	G	A	DOID:3571 / liver cancer/HERVH	GE	5808	MU2935600		intergenic_region
Noncanon	1	4245075	A	G	DOID:5041 / esophageal cancer/HERVH	GE	5808	MU69968896		intergenic_region
Noncanon	1	4245389	G	T	DOID:4159 / skin cancer/HERVH	GE	5808	MU42156102		intergenic_region
Noncanon	1	4245419	C	T	DOID:4159 / skin cancer/HERVH	GE	5808	MU41986414		intergenic_region
Noncanon	1	4245594	T	C	DOID:3571 / liver cancer/HERVH	GE	5808	MU3177402		intergenic_region
Noncanon	1	4245955	G	A	DOID:3571 / liver cancer/HERVH	GE	5808	MU3489141		intergenic_region
Noncanon	1	4246195	G	A	DOID:4159 / skin cancer/HERVH	GE	5808	MU55906313		intergenic_region
Noncanon	1	4246409	G	A	DOID:4159 / skin cancer/HERVH	GE	5808	MU57625681		intergenic_region
Noncanon	1	4246445	G	A	DOID:4159 / skin cancer/HERVH	GE	5808	MU58906598		intergenic_region
Noncanon	1	4246483	T	C	DOID:5041 / esophageal cancer/HERVH	GE	5808	MU70336240		intergenic_region
Noncanon	1	4246539	G	A	DOID:4159 / skin cancer/HERVH	GE	5808	MU41597229		intergenic_region
Noncanon	1	4246557	T	C	DOID:5041 / esophageal cancer/HERVH	GE	5808	MU24897293		intergenic_region
Noncanon	1	4246666	G	A	DOID:4159 / skin cancer/HERVH	GE	5808	MU59285372		intergenic_region
Noncanon	1	4246860	G	A	DOID:4159 / skin cancer/HERVH	GE	5808	MU43236497		intergenic_region
Noncanon	1	4246959	T	G	DOID:5041 / esophageal cancer/HERVH	GE	5808	MU69172977		intergenic_region
Noncanon	1	4247007	G	A	DOID:4159 / skin cancer/HERVH	GE	5808	MU50324605		intergenic_region
Noncanon	1	4247139	G	A	DOID:4159 / skin cancer/HERVH	GE	5808	MU46921588		intergenic_region
Noncanon	1	4247464	G	A	DOID:4159 / skin cancer/HERVH	GE	5808	MU61250635		intergenic_region
Canon	1	5104974	T	C	DOID:5041 / esophageal cancer/HERVH	GE	5811	MU37395893		intergenic_region
Canon	1	5105017	C	T	DOID:4159 / skin cancer/HERVH	GE	5811	MU39009653		intergenic_region
Canon	1	5105082	C	T	DOID:4159 / skin cancer/HERVH	GE	5811	MU41554747		intergenic_region
Canon	1	5105119	C	T	DOID:1793 / pancreatic cancer/HERVH	GE	5811	MU28893204		intergenic_region
Canon	1	5105151	T	G	DOID:5041 / esophageal cancer/HERVH	GE	5811	MU25328284		intergenic_region
Canon	1	5105251	A	G	DOID:1793 / pancreatic cancer/HERVH	GE	5811	MU5672594		intergenic_region
Canon	1	5105360	C	T	DOID:4159 / skin cancer/HERVH	GE	5811	MU59827936		intergenic_region
Canon	1	5105442	C	T	DOID:4159 / skin cancer/HERVH	GE	5811	MU38714991		intergenic_region
Canon	1	5105451	G	T	DOID:5041 / esophageal cancer/HERVH	GE	5811	MU70132725		intergenic_region
Canon	1	5105479	C	T	DOID:4159 / skin cancer/HERVH	GE	5811	MU44206395		intergenic_region
Canon	1	5105668	G	A	DOID:4159 / skin cancer/HERVH	GE	5811	MU54662087		intergenic_region
Canon	1	5105673	C	G	DOID:1324 / lung cancer/HERVH	GE	5811	MU63283626		intergenic_region
Canon	1	5105755	T	C	DOID:1612 / breast cancer/HERVH	GE	5811	MU67061170		intergenic_region
Canon	1	5105917	C	A	DOID:5041 / esophageal cancer/HERVH	GE	5811	MU71102953		intergenic_region
Canon	1	5105924	C	T	DOID:4159 / skin cancer/HERVH	GE	5811	MU35598120		intergenic_region
Canon	1	5105977	G	A	DOID:4159 / skin cancer/HERVH	GE	5811	MU39009657		intergenic_region
Canon	1	5105985	C	T	DOID:4159 / skin cancer/HERVH	GE	5811	MU47105688		intergenic_region
Canon	1	5106062	C	T	DOID:4159 / skin cancer/HERVH	GE	5811	MU43405390		intergenic_region
Canon	1	5106156	C	T	DOID:4159 / skin cancer/HERVH	GE	5811	MU44836846		intergenic_region
Canon	1	5106284	G	T	DOID:3571 / liver cancer/HERVH	GE	5811	MU31889517		intergenic_region
Canon	1	5106347	T	A	DOID:1324 / lung cancer/HERVH	GE	5811	MU63231602		intergenic_region
Canon	1	5106353	C	T	DOID:4159 / skin cancer/HERVH	GE	5811	MU43210903		intergenic_region
Canon	1	5106441	C	T	DOID:4159 / skin cancer/HERVH	GE	5811	MU60843168		intergenic_region
Canon	1	5106773	G	A	DOID:4159 / skin cancer/HERVH	GE	5811	MU61575183		intergenic_region
Canon	1	5106878	G	A	DOID:1612 / breast cancer/HERVH	GE	5811	MU66385287		intergenic_region
Canon	1	5107211	G	T	DOID:1324 / lung cancer/HERVH	GE	5811	MU48842472		intergenic_region
Canon	1	5107254	T	A	DOID:263 / kidney cancer/HERVH	GE	5811	MU19816103		intergenic_region
Canon	1	5107318	G	T	DOID:1612 / breast cancer/HERVH	GE	5811	MU66956376		intergenic_region
Canon	1	5107348	C	A	DOID:1612 / breast cancer/HERVH	GE	5811	MU65569312		intergenic_region
Canon	1	5107464	C	T	DOID:4159 / skin cancer/HERVH	GE	5811	MU56101678		intergenic_region
Canon	1	5107471	C	T	DOID:4159 / skin cancer/HERVH	GE	5811	MU61641494		intergenic_region
Canon	1	5107488	G	A	DOID:4159 / skin cancer/HERVH	GE	5811	MU48391643		intergenic_region
Canon	1	5107595	A	G	DOID:4159 / skin cancer/HERVH	GE	5811	MU61320776		intergenic_region
Canon	1	5107652	C	G	DOID:4159 / skin cancer/HERVH	GE	5811	MU59362241		intergenic_region
Canon	1	5107673	C	T	DOID:4159 / skin cancer/HERVH	GE	5811	MU57776885		intergenic_region
Canon	1	5107808	A	G	DOID:3571 / liver cancer/HERVH	GE	5811	MU2738710		intergenic_region
Canon	1	5108028	C	A	DOID:5041 / esophageal cancer/HERVH	GE	5811	MU70539071		intergenic_region
Canon	1	5108046	G	A	DOID:4159 / skin cancer/HERVH	GE	5811	MU50102981		intergenic_region
Canon	1	5108182	C	A	DOID:1793 / pancreatic cancer/HERVH	GE	5811	MU11432760		intergenic_region
Canon	1	5108227	A	C	DOID:1612 / breast cancer/HERVH	GE	5811	MU64374722		intergenic_region
Canon	1	5108374	C	T	DOID:4159 / skin cancer/HERVH	GE	5811	MU39009661		intergenic_region
Canon	1	5108384	C	T	DOID:4159 / skin cancer/HERVH	GE	5811	MU44634818		intergenic_region
Canon	1	5108401	T	A	DOID:5041 / esophageal cancer/HERVH	GE	5811	MU69739274		intergenic_region
Canon	1	5108454	G	A	DOID:3571 / liver cancer/HERVH	GE	5811	MU5677699		intergenic_region
Canon	1	5108519	G	A	DOID:5041 / esophageal cancer/HERVH	GE	5811	MU19053861		intergenic_region
Canon	1	5108525	A	G	DOID:2394 / ovarian cancer/HERVH	GE	5811	MU5361813		intergenic_region
Canon	1	5108616	T	C	DOID:5041 / esophageal cancer/HERVH	GE	5811	MU33505201		intergenic_region
Canon	1	5108688	C	T	DOID:4159 / skin cancer/HERVH	GE	5811	MU34493032		intergenic_region
Canon	1	5108804	G	T	DOID:1324 / lung cancer/HERVH	GE	5811	MU56890082		intergenic_region
Canon	1	5109446	T	A	DOID:2394 / ovarian cancer/HERVH	GE	5811	MU5361848		intergenic_region
Canon	1	5109493	C	A	DOID:2394 / ovarian cancer/HERVH	GE	5811	MU5361857		intergenic_region
Canon	1	5109935	T	C	DOID:1612 / breast cancer/HERVH	GE	5811	MU66840473		intergenic_region
Canon	1	5109962	C	T	DOID:4159 / skin cancer/HERVH	GE	5811	MU59411238		intergenic_region
Canon	1	5110096	G	A	DOID:4159 / skin cancer/HERVH	GE	5811	MU58338589		intergenic_region
Canon	1	5110098	G	T	DOID:3571 / liver cancer/HERVH	GE	5811	MU2738635		intergenic_region
Canon	1	5110289	T	C	DOID:4159 / skin cancer/HERVH	GE	5811	MU42273169		intergenic_region
Canon	1	5110328	G	A	DOID:4159 / skin cancer/HERVH	GE	5811	MU41023184		intergenic_region
Canon	1	5110359	T	C	DOID:2531 / hematologic cancer/HERVH	GE	5811	MU53936911		intergenic_region
Canon	1	5110423	T	A	DOID:5041 / esophageal cancer/HERVH	GE	5811	MU70352178		intergenic_region
Canon	1	5110448	C	T	DOID:4159 / skin cancer/HERVH	GE	5811	MU53542411		intergenic_region
Canon	1	5110580	C	T	DOID:4159 / skin cancer/HERVH	GE	5811	MU60017657		intergenic_region
Canon	1	5110649	C	T	DOID:4159 / skin cancer/HERVH	GE	5811	MU60584811		intergenic_region
Canon	1	5110693	A	C	DOID:2531 / hematologic cancer/HERVH	GE	5811	MU68894515		intergenic_region
Canon	1	5110707	C	T	DOID:1319 / brain cancer/HERVH	GE	5811	MU9233966		intergenic_region
Canon	1	5110883	C	T	DOID:4159 / skin cancer/HERVH	GE	5811	MU36243181		intergenic_region
Canon	1	5110893	C	T	DOID:4159 / skin cancer/HERVH	GE	5811	MU45124282		intergenic_region
Canon	1	5110996	C	T	DOID:4159 / skin cancer/HERVH	GE	5811	MU46320909		intergenic_region
Canon	1	5111074	G	A	DOID:4159 / skin cancer/HERVH	GE	5811	MU57420422		intergenic_region
Canon	1	5111080	C	T	DOID:4159 / skin cancer/HERVH	GE	5811	MU57159797		intergenic_region
Canon	1	5111173	C	T	DOID:1612 / breast cancer/HERVH	GE	5811	MU66335149		intergenic_region
Canon	1	5111332	C	T	DOID:4159 / skin cancer/HERVH	GE	5811	MU42429318		intergenic_region
Canon	1	5111345	T	G	DOID:5041 / esophageal cancer/HERVH	GE	5811	MU578184		intergenic_region
Canon	1	5111923	C	T	DOID:4159 / skin cancer/HERVH	GE	5811	MU50956301		intergenic_region
Canon	1	5111961	C	T	DOID:4159 / skin cancer/HERVH	GE	5811	MU43144935		intergenic_region
Canon	1	5111980	C	T	DOID:4159 / skin cancer/HERVH	GE	5811	MU58426494		intergenic_region
Canon	1	5112049	G	A	DOID:4159 / skin cancer/HERVH	GE	5811	MU60195614		intergenic_region
Canon	1	5112056	C	T	DOID:4159 / skin cancer/HERVH	GE	5811	MU52944734		intergenic_region
Canon	1	5112188	G	A	DOID:4159 / skin cancer/HERVH	GE	5811	MU57302648		intergenic_region
Canon	1	5112329	C	T	DOID:4159 / skin cancer/HERVH	GE	5811	MU42404940		intergenic_region
Canon	1	5112370	T	C	DOID:5041 / esophageal cancer/HERVH	GE	5811	MU69739283		intergenic_region
Canon	1	5112408	G	A	DOID:1793 / pancreatic cancer/HERVH	GE	5811	MU11432776		intergenic_region
Canon	1	5112511	A	T	DOID:1793 / pancreatic cancer/HERVH	GE	5811	MU11432781		intergenic_region
Canon	1	5112663	C	T	DOID:4159 / skin cancer/HERVH	GE	5811	MU35524111		intergenic_region
Canon	1	5112706	G	A	DOID:4159 / skin cancer/HERVH	GE	5811	MU58182087		intergenic_region
Canon	1	5112818	T	C	DOID:5041 / esophageal cancer/HERVH	GE	5811	MU2234216		intergenic_region
Canon	1	5112845	C	T	DOID:2394 / ovarian cancer/HERVH	GE	5811	MU5361996		intergenic_region
Canon	1	5112893	A	G	DOID:1612 / breast cancer/HERVH	GE	5811	MU63798827		intergenic_region
Canon	1	5112935	G	T	DOID:5041 / esophageal cancer/HERVH	GE	5811	MU35524277		intergenic_region
Noncanon	1	5128496	G	C	DOID:5041 / esophageal cancer/MER31	GE	5812	MU37341962		intergenic_region
Noncanon	1	5128620	G	A	DOID:4159 / skin cancer/MER31	GE	5812	MU39009681		intergenic_region
Noncanon	1	5128678	G	C	DOID:5041 / esophageal cancer/MER31	GE	5812	MU70405378		intergenic_region
Noncanon	1	5128716	T	C	DOID:5041 / esophageal cancer/MER31	GE	5812	MU2803571		intergenic_region
Noncanon	1	5129039	G	A	DOID:4159 / skin cancer/MER31	GE	5812	MU60569660		intergenic_region
Noncanon	1	5129071	T	C	DOID:4159 / skin cancer/MER31	GE	5812	MU57540635		intergenic_region
Noncanon	1	5129112	G	T	DOID:2531 / hematologic cancer/MER31	GE	5812	MU44336380		intergenic_region
Noncanon	1	5129122	G	A	DOID:4159 / skin cancer/MER31	GE	5812	MU5673846		intergenic_region
Noncanon	1	5129122	G	A	DOID:1793 / pancreatic cancer/MER31	GE	5812	MU5673846		intergenic_region
Noncanon	1	5129193	C	T	DOID:4159 / skin cancer/MER31	GE	5812	MU42863718		intergenic_region
Noncanon	1	5129249	C	T	DOID:4159 / skin cancer/MER31	GE	5812	MU57318491		intergenic_region
Noncanon	1	5129329	T	A	DOID:4159 / skin cancer/MER31	GE	5812	MU48636418		intergenic_region
Noncanon	1	5129471	T	G	DOID:1793 / pancreatic cancer/MER31	GE	5812	MU32376634		intergenic_region
Noncanon	1	5129549	A	G	DOID:3571 / liver cancer/MER31	GE	5812	MU29434872		intergenic_region
Noncanon	1	5129581	A	G	DOID:4159 / skin cancer/MER31	GE	5812	MU57448386		intergenic_region
Noncanon	1	5129724	A	G	DOID:4159 / skin cancer/MER31	GE	5812	MU39009685		intergenic_region
Noncanon	1	5129761	G	A	DOID:3571 / liver cancer/MER31	GE	5812	MU3293090		intergenic_region
Noncanon	1	5129870	G	T	DOID:3571 / liver cancer/MER31	GE	5812	MU2884428		intergenic_region
Noncanon	1	5130069	C	T	DOID:4159 / skin cancer/MER31	GE	5812	MU42002122		intergenic_region
Noncanon	1	5130142	A	G	DOID:3571 / liver cancer/MER31	GE	5812	MU3197254		intergenic_region
Noncanon	1	5130253	G	A	DOID:4159 / skin cancer/MER31	GE	5812	MU45618725		intergenic_region
Noncanon	1	5130276	C	T	DOID:1793 / pancreatic cancer/MER31	GE	5812	MU5673891		intergenic_region
Noncanon	1	5130430	C	G	DOID:5041 / esophageal cancer/MER31	GE	5812	MU33642169		intergenic_region
Noncanon	1	5130716	C	A	DOID:5041 / esophageal cancer/MER31	GE	5812	MU23145019		intergenic_region
Noncanon	1	5130732	C	T	DOID:4159 / skin cancer/MER31	GE	5812	MU58526346		intergenic_region
Noncanon	1	5130744	T	A	DOID:3571 / liver cancer/MER31	GE	5812	MU9811813		intergenic_region
Noncanon	1	5130862	C	T	DOID:4159 / skin cancer/MER31	GE	5812	MU59191215		intergenic_region
Noncanon	1	5130895	C	A	DOID:1793 / pancreatic cancer/MER31	GE	5812	MU11432863		intergenic_region
Noncanon	1	5130897	A	C	DOID:5041 / esophageal cancer/MER31	GE	5812	MU69739301		intergenic_region
Noncanon	1	5131022	C	T	DOID:5041 / esophageal cancer/MER31	GE	5812	MU68423032		intergenic_region
Noncanon	1	5131041	G	A	DOID:4159 / skin cancer/MER31	GE	5812	MU45717566		intergenic_region
Noncanon	1	5131320	G	A	DOID:4159 / skin cancer/MER31	GE	5812	MU53046373		intergenic_region
Noncanon	1	5131451	C	T	DOID:4159 / skin cancer/MER31	GE	5812	MU60450615		intergenic_region
Noncanon	1	5131484	G	A	DOID:4159 / skin cancer/MER31	GE	5812	MU34439466		intergenic_region
Noncanon	1	5131551	G	A	DOID:4159 / skin cancer/MER31	GE	5812	MU49749471		intergenic_region
Noncanon	1	5131592	G	A	DOID:4159 / skin cancer/MER31	GE	5812	MU58674182		intergenic_region
Noncanon	1	5131670	A	C	DOID:5041 / esophageal cancer/MER31	GE	5812	MU19054028		intergenic_region
Noncanon	1	5131793	T	A	DOID:1793 / pancreatic cancer/MER31	GE	5812	MU5673917		intergenic_region
Noncanon	1	5131927	T	C	DOID:1612 / breast cancer/MER31	GE	5812	MU65771377		intergenic_region
Noncanon	1	5132015	C	T	DOID:4159 / skin cancer/MER31	GE	5812	MU39009689		intergenic_region
Noncanon	1	5132025	A	C	DOID:2531 / hematologic cancer/MER31	GE	5812	MU56315092		intergenic_region
Noncanon	1	5132244	C	T	DOID:4159 / skin cancer/MER31	GE	5812	MU46312885		intergenic_region
Noncanon	1	5132447	A	T	DOID:2394 / ovarian cancer/MER31	GE	5812	COSN8473127	.	.
Noncanon	1	5132493	C	T	DOID:4159 / skin cancer/MER31	GE	5812	MU58407441		intergenic_region
Noncanon	1	5132745	G	T	DOID:4159 / skin cancer/MER31	GE	5812	MU53182992		intergenic_region
Noncanon	1	5132813	T	A	DOID:4159 / skin cancer/MER31	GE	5812	MU48256515		intergenic_region
Noncanon	1	5132856	C	T	DOID:4159 / skin cancer/MER31	GE	5812	MU62600935		intergenic_region
Noncanon	1	5133133	G	A	DOID:4159 / skin cancer/MER31	GE	5812	MU34439362		intergenic_region
Noncanon	1	5133281	A	T	DOID:2394 / ovarian cancer/MER31	GE	5812	COSN8473129	.	.
Noncanon	1	5133281	A	T	DOID:2394 / ovarian cancer/MER31	GE	5812	MU5362890		intergenic_region
Noncanon	1	5133508	G	A	DOID:4159 / skin cancer/MER31	GE	5812	MU59946965		intergenic_region
Noncanon	1	5133655	G	A	DOID:4159 / skin cancer/MER31	GE	5812	MU52333994		intergenic_region
Noncanon	1	5133721	A	T	DOID:1612 / breast cancer/MER31	GE	5812	MU66306693		intergenic_region
Noncanon	1	5133739	C	T	DOID:4159 / skin cancer/MER31	GE	5812	MU42177285		intergenic_region
Noncanon	1	5133786	G	T	DOID:4159 / skin cancer/MER31	GE	5812	MU40311024		intergenic_region
Noncanon	1	5133790	G	T	DOID:4159 / skin cancer/MER31	GE	5812	MU40311026		intergenic_region
Noncanon	1	5133858	G	A	DOID:4159 / skin cancer/MER31	GE	5812	MU52916190		intergenic_region
Noncanon	1	5133882	A	T	DOID:1793 / pancreatic cancer/MER31	GE	5812	MU30962817		intergenic_region
Noncanon	1	5133944	T	A	DOID:1793 / pancreatic cancer/MER31	GE	5812	MU5673965		intergenic_region
Noncanon	1	5134058	G	A	DOID:4159 / skin cancer/MER31	GE	5812	MU58084179		intergenic_region
Noncanon	1	5134085	C	T	DOID:4159 / skin cancer/MER31	GE	5812	MU61263013		intergenic_region
Noncanon	1	5134305	G	A	DOID:4159 / skin cancer/MER31	GE	5812	MU43005473		intergenic_region
Noncanon	1	5134352	T	C	DOID:3571 / liver cancer/MER31	GE	5812	MU3505086		intergenic_region
Noncanon	1	5134626	C	T	DOID:1793 / pancreatic cancer/MER31	GE	5812	MU31738139		intergenic_region
Noncanon	1	5134873	T	G	DOID:2394 / ovarian cancer/MER31	GE	5812	MU5362926		intergenic_region
Noncanon	1	5135084	G	A	DOID:4159 / skin cancer/MER31	GE	5812	MU43841470		intergenic_region
Noncanon	1	5135188	C	T	DOID:4159 / skin cancer/MER31	GE	5812	MU45101111		intergenic_region
Noncanon	1	5135394	C	T	DOID:4159 / skin cancer/MER31	GE	5812	MU58718988		intergenic_region
Noncanon	1	5135405	A	T	DOID:1793 / pancreatic cancer/MER31	GE	5812	MU11432903		intergenic_region
Noncanon	1	5135732	G	A	DOID:1319 / brain cancer/MER31	GE	5812	MU68626094		intergenic_region
Noncanon	1	5135738	T	A	DOID:1319 / brain cancer/MER31	GE	5812	MU67666006		intergenic_region
Noncanon	1	5135745	T	A	DOID:4159 / skin cancer/MER31	GE	5812	MU34309629		intergenic_region
Noncanon	1	5135782	G	A	DOID:1319 / brain cancer/MER31	GE	5812	MU32779453		intergenic_region
Noncanon	1	5135782	G	A	DOID:4159 / skin cancer/MER31	GE	5812	MU32779453		intergenic_region
Noncanon	1	5135783	C	T	DOID:2394 / ovarian cancer/MER31	GE	5812	MU5362956		intergenic_region
Noncanon	1	5135800	T	A	DOID:4159 / skin cancer/MER31	GE	5812	MU29258740		intergenic_region
Noncanon	1	5136031	A	C	DOID:5041 / esophageal cancer/MER31	GE	5812	MU69286918		intergenic_region
Noncanon	1	5136126	G	A	DOID:4159 / skin cancer/MER31	GE	5812	MU52521058		intergenic_region
Noncanon	1	5136252	G	A	DOID:1612 / breast cancer/MER31	GE	5812	MU65081061		intergenic_region
Noncanon	1	5136274	C	T	DOID:4159 / skin cancer/MER31	GE	5812	MU55973509		intergenic_region
Noncanon	1	5136574	T	C	DOID:1612 / breast cancer/MER31	GE	5812	MU66279939		intergenic_region
Noncanon	1	5136599	C	T	DOID:1793 / pancreatic cancer/MER31	GE	5812	MU30171979		intergenic_region
Noncanon	1	5136640	G	A	DOID:4159 / skin cancer/MER31	GE	5812	MU47124787		intergenic_region
Noncanon	1	5136713	G	A	DOID:4159 / skin cancer/MER31	GE	5812	MU59432393		intergenic_region
Noncanon	1	5136731	C	T	DOID:4159 / skin cancer/MER31	GE	5812	MU51613540		intergenic_region
Noncanon	1	5136868	C	A	DOID:1612 / breast cancer/MER31	GE	5812	MU64352890		intergenic_region
Noncanon	1	5137466	G	A	DOID:4159 / skin cancer/MER31	GE	5812	MU60003816		intergenic_region
Noncanon	1	5137704	G	A	DOID:2531 / hematologic cancer/MER31	GE	5812	MU49128657		intergenic_region
Noncanon	1	5137750	C	T	DOID:4159 / skin cancer/MER31	GE	5812	MU49488509		intergenic_region
Noncanon	1	5137847	G	A	DOID:4159 / skin cancer/MER31	GE	5812	MU60948103		intergenic_region
Noncanon	1	5137910	C	T	DOID:4159 / skin cancer/MER31	GE	5812	MU43469357		intergenic_region
Noncanon	1	5138247	C	T	DOID:4159 / skin cancer/MER31	GE	5812	MU51107784		intergenic_region
Noncanon	1	5138281	G	A	DOID:4159 / skin cancer/MER31	GE	5812	MU41621422		intergenic_region
Noncanon	1	5138513	T	C	DOID:4159 / skin cancer/MER31	GE	5812	MU51699619		intergenic_region
Noncanon	1	5138554	T	A	DOID:5041 / esophageal cancer/MER31	GE	5812	MU70377872		intergenic_region
Noncanon	1	5138782	T	A	DOID:5041 / esophageal cancer/MER31	GE	5812	MU37056432		intergenic_region
Noncanon	1	5138891	C	T	DOID:4159 / skin cancer/MER31	GE	5812	MU71297863		intergenic_region
Noncanon	1	5138921	C	T	DOID:4159 / skin cancer/MER31	GE	5812	MU61022825		intergenic_region
Noncanon	1	5139023	C	G	DOID:3571 / liver cancer/MER31	GE	5812	MU2939843		intergenic_region
Noncanon	1	5139036	G	T	DOID:4159 / skin cancer/MER31	GE	5812	MU48441040		intergenic_region
Noncanon	1	5139177	T	G	DOID:3571 / liver cancer/MER31	GE	5812	MU5678930		intergenic_region
Noncanon	1	5139312	C	T	DOID:4159 / skin cancer/MER31	GE	5812	MU44937463		intergenic_region
Noncanon	1	5139473	C	A	DOID:1612 / breast cancer/MER31	GE	5812	MU65458210		intergenic_region
Noncanon	1	5139585	G	A	DOID:4159 / skin cancer/MER31	GE	5812	MU43970815		intergenic_region
Noncanon	1	5139698	C	A	DOID:3571 / liver cancer/MER31	GE	5812	MU1213014		intergenic_region
Noncanon	1	5139761	C	T	DOID:1793 / pancreatic cancer/MER31	GE	5812	MU11432938		intergenic_region
Noncanon	1	5139763	C	T	DOID:4159 / skin cancer/MER31	GE	5812	MU38960273		intergenic_region
Noncanon	1	5139801	G	A	DOID:5041 / esophageal cancer/MER31	GE	5812	MU70015367		intergenic_region
Noncanon	1	5139819	C	T	DOID:4159 / skin cancer/MER31	GE	5812	MU59828115		intergenic_region
Noncanon	1	5139867	C	T	DOID:4159 / skin cancer/MER31	GE	5812	MU56993433		intergenic_region
Noncanon	1	5139904	C	T	DOID:4159 / skin cancer/MER31	GE	5812	MU48887670		intergenic_region
Noncanon	1	5139905	C	T	DOID:4159 / skin cancer/MER31	GE	5812	MU61543712		intergenic_region
Noncanon	1	5139966	T	G	DOID:1793 / pancreatic cancer/MER31	GE	5812	MU16603641		intergenic_region
Noncanon	1	5140236	G	T	DOID:3571 / liver cancer/MER31	GE	5812	MU53388254		intergenic_region
Noncanon	1	5140250	C	A	DOID:10283 / prostate cancer/MER31	GE	5812	MU28580669		intergenic_region
Noncanon	1	5140310	A	G	DOID:3571 / liver cancer/MER31	GE	5812	MU5678974		intergenic_region
Noncanon	1	5140333	G	A	DOID:1612 / breast cancer/MER31	GE	5812	MU65527409		intergenic_region
Noncanon	1	5140627	C	T	DOID:4159 / skin cancer/MER31	GE	5812	MU58121939		intergenic_region
Noncanon	1	5140745	G	A	DOID:4159 / skin cancer/MER31	GE	5812	MU60544084		intergenic_region
Noncanon	1	5140750	C	G	DOID:4159 / skin cancer/MER31	GE	5812	MU53088748		intergenic_region
Noncanon	1	5140844	A	C	DOID:4159 / skin cancer/MER31	GE	5812	MU59118467		intergenic_region
Noncanon	1	5140963	C	T	DOID:4159 / skin cancer/MER31	GE	5812	MU58882050		intergenic_region
Noncanon	1	5141063	T	A	DOID:4159 / skin cancer/MER31	GE	5812	MU60764225		intergenic_region
Noncanon	1	5141073	A	T	DOID:219 / colon cancer/MER31	GE	5812	MU63523782		intergenic_region
Noncanon	1	5141395	G	A	DOID:4159 / skin cancer/MER31	GE	5812	MU49217584		intergenic_region
Noncanon	1	5141438	T	C	DOID:1612 / breast cancer/MER31	GE	5812	MU64772657		intergenic_region
Noncanon	1	5141474	C	T	DOID:4159 / skin cancer/MER31	GE	5812	MU52590370		intergenic_region
Noncanon	1	5141632	G	A	DOID:4159 / skin cancer/MER31	GE	5812	MU56739186		intergenic_region
Noncanon	1	5141829	G	A	DOID:1612 / breast cancer/MER31	GE	5812	MU65926558		intergenic_region
Noncanon	1	5141912	G	A	DOID:5041 / esophageal cancer/MER31	GE	5812	MU24989161		intergenic_region
Noncanon	1	5141936	G	A	DOID:3571 / liver cancer/MER31	GE	5812	MU5679016		intergenic_region
Noncanon	1	5141970	G	A	DOID:4159 / skin cancer/MER31	GE	5812	MU63092614		intergenic_region
Noncanon	1	5142028	A	C	DOID:5041 / esophageal cancer/MER31	GE	5812	MU578183		intergenic_region
Noncanon	1	5142134	C	T	DOID:4159 / skin cancer/MER31	GE	5812	MU46925880		intergenic_region
Noncanon	1	5142135	G	A	DOID:4159 / skin cancer/MER31	GE	5812	MU54481568		intergenic_region
Noncanon	1	5142650	C	T	DOID:4159 / skin cancer/MER31	GE	5812	MU60100887		intergenic_region
Noncanon	1	5142733	G	A	DOID:4159 / skin cancer/MER31	GE	5812	MU58577839		intergenic_region
Noncanon	1	5142850	C	T	DOID:4159 / skin cancer/MER31	GE	5812	MU44361485		intergenic_region
Noncanon	1	5142864	G	C	DOID:1612 / breast cancer/MER31	GE	5812	MU65602436		intergenic_region
Noncanon	1	5142981	A	T	DOID:4159 / skin cancer/MER31	GE	5812	MU9811993		intergenic_region
Noncanon	1	5143070	G	A	DOID:4159 / skin cancer/MER31	GE	5812	MU53701369		intergenic_region
Noncanon	1	5143083	A	G	DOID:1793 / pancreatic cancer/MER31	GE	5812	MU69502873		intergenic_region
Noncanon	1	5143094	G	A	DOID:4159 / skin cancer/MER31	GE	5812	MU53608131		intergenic_region
Noncanon	1	5143110	G	T	DOID:1793 / pancreatic cancer/MER31	GE	5812	MU5674364		intergenic_region
Noncanon	1	6620609	G	A	DOID:4159 / skin cancer/HERVFB	GE	5814	MU42052719	TAS1R1	intron_variant
Noncanon	1	6620651	T	C	DOID:4159 / skin cancer/HERVFB	GE	5814	MU42768138	TAS1R1	intron_variant
Noncanon	1	6620672	T	C	DOID:3571 / liver cancer/HERVFB	GE	5814	MU3404456	TAS1R1	intron_variant
Noncanon	1	6620679	C	T	DOID:4159 / skin cancer/HERVFB	GE	5814	MU46708510	TAS1R1	intron_variant
Noncanon	1	6620689	C	T	DOID:4159 / skin cancer/HERVFB	GE	5814	MU33315090	TAS1R1	intron_variant
Noncanon	1	6620692	C	T	DOID:4159 / skin cancer/HERVFB	GE	5814	MU45640396	TAS1R1	intron_variant
Noncanon	1	6620754	C	A	DOID:3571 / liver cancer/HERVFB	GE	5814	MU3045213	TAS1R1	intron_variant
Noncanon	1	6620858	C	A	DOID:2394 / ovarian cancer/HERVFB	GE	5814	MU5427166	TAS1R1	intron_variant
Noncanon	1	6621269	A	T	DOID:2394 / ovarian cancer/HERVFB	GE	5814	MU5427209	TAS1R1	intron_variant
Noncanon	1	6621952	G	A	DOID:263 / kidney cancer/HERVFB	GE	5814	MU4197009	TAS1R1	intron_variant
Noncanon	1	6622076	G	A	DOID:4159 / skin cancer/HERVFB	GE	5814	MU61734050	TAS1R1	intron_variant
Noncanon	1	6622089	G	C	DOID:1612 / breast cancer/HERVFB	GE	5814	MU2154322	TAS1R1	intron_variant
Noncanon	1	6622323	G	A	DOID:4159 / skin cancer/HERVFB	GE	5814	MU58327466	TAS1R1	intron_variant
Noncanon	1	6622449	C	T	DOID:4159 / skin cancer/HERVFB	GE	5814	MU36244647	TAS1R1	intron_variant
Noncanon	1	6622536	G	A	DOID:4159 / skin cancer/HERVFB	GE	5814	MU55715719	TAS1R1	intron_variant
Noncanon	1	6622805	G	A	DOID:4159 / skin cancer/HERVFB	GE	5814	MU46970313	TAS1R1	intron_variant
Noncanon	1	6623181	A	G	DOID:2394 / ovarian cancer/HERVFB	GE	5814	MU5427242	TAS1R1	intron_variant
Noncanon	1	6623253	A	C	DOID:5041 / esophageal cancer/HERVFB	GE	5814	MU24897977	TAS1R1	intron_variant
Noncanon	1	6623589	C	T	DOID:10283 / prostate cancer/HERVFB	GE	5814	MU56759368	TAS1R1	intron_variant
Noncanon	1	6623859	C	A	DOID:5041 / esophageal cancer/HERVFB	GE	5814	MU70551431	TAS1R1	intron_variant
Noncanon	1	6623967	C	T	DOID:1793 / pancreatic cancer/HERVFB	GE	5814	MU5739954	TAS1R1	intron_variant
Noncanon	1	6624128	G	A	DOID:4159 / skin cancer/HERVFB	GE	5814	MU52938020	TAS1R1	intron_variant
Noncanon	1	6624421	G	A	DOID:4159 / skin cancer/HERVFB	GE	5814	MU43362016	TAS1R1	intron_variant
Noncanon	1	6624510	G	A	DOID:4159 / skin cancer/HERVFB	GE	5814	MU52264763	TAS1R1	intron_variant
Noncanon	1	6624537	C	T	DOID:4159 / skin cancer/HERVFB	GE	5814	MU58976613	TAS1R1	intron_variant
Noncanon	1	6624734	G	A	DOID:4159 / skin cancer/HERVFB	GE	5814	MU41976569	TAS1R1	intron_variant
Noncanon	1	6625064	G	A	DOID:4159 / skin cancer/HERVFB	GE	5814	MU60316929	TAS1R1	intron_variant
Noncanon	1	6625437	C	A	DOID:1612 / breast cancer/HERVFB	GE	5814	MU66427747	TAS1R1	intron_variant
Noncanon	1	6626037	G	T	DOID:2394 / ovarian cancer/HERVFB	GE	5814	MU5427456	TAS1R1	intron_variant
Noncanon	1	6626280	C	T	DOID:4159 / skin cancer/HERVFB	GE	5814	MU45383225	TAS1R1	intron_variant
Noncanon	1	6626646	G	A	DOID:4159 / skin cancer/HERVFB	GE	5814	MU60027579	TAS1R1	intron_variant
Noncanon	1	6626845	C	T	DOID:5041 / esophageal cancer/HERVFB	GE	5814	MU70132772	TAS1R1	intron_variant
Noncanon	1	6626864	C	T	DOID:4159 / skin cancer/HERVFB	GE	5814	MU41690882	TAS1R1	intron_variant
Noncanon	1	6626944	G	A	DOID:4159 / skin cancer/HERVFB	GE	5814	MU55341308	TAS1R1	intron_variant
Noncanon	1	6626965	T	A	DOID:5041 / esophageal cancer/HERVFB	GE	5814	MU24476715	TAS1R1	intron_variant
Noncanon	1	6627059	G	A	DOID:4159 / skin cancer/HERVFB	GE	5814	MU45904629	TAS1R1	intron_variant
Noncanon	1	6627134	C	T	DOID:4159 / skin cancer/HERVFB	GE	5814	MU60591764	TAS1R1	intron_variant
Noncanon	1	6627168	G	A	DOID:4159 / skin cancer/HERVFB	GE	5814	MU54292762	TAS1R1	intron_variant
Noncanon	1	6627304	A	G	DOID:1793 / pancreatic cancer/HERVFB	GE	5814	MU4661342	TAS1R1	intron_variant
Noncanon	1	6628137	G	A	DOID:1612 / breast cancer/HERVFB	GE	5814	MU63631648	TAS1R1	intron_variant
Noncanon	1	6628442	G	A	DOID:4159 / skin cancer/HERVFB	GE	5814	MU39522783	TAS1R1	intron_variant
Noncanon	1	6628620	G	A	DOID:4159 / skin cancer/HERVFB	GE	5814	MU38074076	TAS1R1	intron_variant
Noncanon	1	6628909	C	T	DOID:4159 / skin cancer/HERVFB	GE	5814	MU42133274	TAS1R1	intron_variant
Noncanon	1	6628985	C	T	DOID:1612 / breast cancer/HERVFB	GE	5814	MU66351330	TAS1R1	intron_variant
Noncanon	1	6629050	C	T	DOID:4159 / skin cancer/HERVFB	GE	5814	MU62790024	TAS1R1	intron_variant
Noncanon	1	6629177	G	A	DOID:4159 / skin cancer/HERVFB	GE	5814	MU43032048	TAS1R1	intron_variant
Noncanon	1	6629263	G	A	DOID:4159 / skin cancer/HERVFB	GE	5814	MU43636271	TAS1R1	intron_variant
Noncanon	1	6629273	G	A	DOID:10283 / prostate cancer/HERVFB	GE	5814	MU29988264	TAS1R1	intron_variant
Noncanon	1	6630468	G	A	DOID:1793 / pancreatic cancer/HERVFB	GE	5814	MU5740181	TAS1R1	intron_variant
Noncanon	1	8981395	C	T	DOID:4159 / skin cancer/HERVFB	GE	5815	MU58183165		intergenic_region
Noncanon	1	8981435	G	A	DOID:4159 / skin cancer/HERVFB	GE	5815	MU61272354		intergenic_region
Noncanon	1	8981607	C	T	DOID:4159 / skin cancer/HERVFB	GE	5815	MU48092447		intergenic_region
Noncanon	1	8981749	C	A	DOID:1612 / breast cancer/HERVFB	GE	5815	MU68059016		intergenic_region
Noncanon	1	8982093	C	T	DOID:4159 / skin cancer/HERVFB	GE	5815	MU48133831		intergenic_region
Noncanon	1	8982192	C	T	DOID:4159 / skin cancer/HERVFB	GE	5815	MU46944423		intergenic_region
Noncanon	1	8982589	C	T	DOID:4159 / skin cancer/HERVFB	GE	5815	MU42428392		intergenic_region
Noncanon	1	8982635	C	T	DOID:4159 / skin cancer/HERVFB	GE	5815	MU49012362		intergenic_region
Noncanon	1	8982665	G	A	DOID:2531 / hematologic cancer/HERVFB	GE	5815	MU5881437		intergenic_region
Noncanon	1	8982665	G	A	DOID:1793 / pancreatic cancer/HERVFB	GE	5815	MU5881437		intergenic_region
Noncanon	1	8982782	G	T	DOID:5041 / esophageal cancer/HERVFB	GE	5815	MU22942572		intergenic_region
Noncanon	1	8982926	G	A	DOID:4159 / skin cancer/HERVFB	GE	5815	MU41761705		intergenic_region
Noncanon	1	8983484	T	C	DOID:1319 / brain cancer/HERVFB	GE	5815	MU68859930		intergenic_region
Noncanon	1	8983950	C	T	DOID:5041 / esophageal cancer/HERVFB	GE	5815	MU68071304		intergenic_region
Noncanon	1	8984037	C	T	DOID:4159 / skin cancer/HERVFB	GE	5815	MU58733309		intergenic_region
Noncanon	1	8984138	C	T	DOID:5041 / esophageal cancer/HERVFB	GE	5815	MU16055697		intergenic_region
Noncanon	1	8984434	C	T	DOID:4159 / skin cancer/HERVFB	GE	5815	MU40638189		intergenic_region
Noncanon	1	8984619	C	T	DOID:4159 / skin cancer/HERVFB	GE	5815	MU60638714		intergenic_region
Noncanon	1	8984896	G	A	DOID:4159 / skin cancer/HERVFB	GE	5815	MU52834255		intergenic_region
Noncanon	1	8985004	A	T	DOID:3571 / liver cancer/HERVFB	GE	5815	MU10046635		intergenic_region
Noncanon	1	8985083	C	T	DOID:4159 / skin cancer/HERVFB	GE	5815	MU46588898		intergenic_region
Noncanon	1	8986067	C	T	DOID:4159 / skin cancer/HERVFB	GE	5815	MU58138709		intergenic_region
Noncanon	1	8986070	C	T	DOID:263 / kidney cancer/HERVFB	GE	5815	MU3929667		intergenic_region
Noncanon	1	8986071	G	T	DOID:2394 / ovarian cancer/HERVFB	GE	5815	MU5563823		intergenic_region
Noncanon	1	8986263	C	T	DOID:5041 / esophageal cancer/HERVFB	GE	5815	MU33505474		intergenic_region
Noncanon	1	8986537	C	T	DOID:4159 / skin cancer/HERVFB	GE	5815	MU49217820		intergenic_region
Noncanon	1	8986655	C	T	DOID:4159 / skin cancer/HERVFB	GE	5815	MU41877953		intergenic_region
Noncanon	1	8986905	C	G	DOID:4159 / skin cancer/HERVFB	GE	5815	MU52599093		intergenic_region
Noncanon	1	8987097	C	T	DOID:4159 / skin cancer/HERVFB	GE	5815	MU48849953		intergenic_region
Noncanon	1	9146901	C	T	DOID:4159 / skin cancer/HERVFA	GE	5816	MU59000447	SLC2A5	intron_variant
Noncanon	1	9147508	C	T	DOID:4159 / skin cancer/HERVFA	GE	5816	MU43376553	SLC2A5	intron_variant
Noncanon	1	9148266	G	A	DOID:4159 / skin cancer/HERVFA	GE	5816	MU58918441	SLC2A5	intron_variant
Noncanon	1	9148283	C	T	DOID:4159 / skin cancer/HERVFA	GE	5816	MU47575624	SLC2A5	intron_variant
Noncanon	1	9148348	C	T	DOID:1612 / breast cancer/HERVFA	GE	5816	MU66453440	SLC2A5	intron_variant
Noncanon	1	9149808	G	C	DOID:5041 / esophageal cancer/HERVFA	GE	5816	MU26196214		intergenic_region
Noncanon	1	9149841	C	T	DOID:4159 / skin cancer/HERVFA	GE	5816	MU60140675		intergenic_region
Noncanon	1	9151068	C	T	DOID:4159 / skin cancer/HERVFA	GE	5816	MU49815567		intergenic_region
Noncanon	1	9151336	C	T	DOID:2394 / ovarian cancer/HERVFA	GE	5816	MU5572276		intergenic_region
Noncanon	1	9151732	T	C	DOID:4159 / skin cancer/HERVFA	GE	5816	MU36246117		intergenic_region
Noncanon	1	9151937	T	C	DOID:4159 / skin cancer/HERVFA	GE	5816	MU44448813		intergenic_region
Noncanon	1	9152088	G	A	DOID:4159 / skin cancer/HERVFA	GE	5816	MU57957608		intergenic_region
Noncanon	1	9152275	C	T	DOID:4159 / skin cancer/HERVFA	GE	5816	MU60443276		intergenic_region
Noncanon	1	9152670	T	A	DOID:4159 / skin cancer/HERVFA	GE	5816	MU58592851		intergenic_region
Noncanon	1	9152851	C	T	DOID:4159 / skin cancer/HERVFA	GE	5816	MU41011997		intergenic_region
Noncanon	1	9153123	G	A	DOID:1793 / pancreatic cancer/HERVFA	GE	5816	MU5889057		intergenic_region
Noncanon	1	9154236	A	G	DOID:2531 / hematologic cancer/HERVFA	GE	5816	MU69553609		intergenic_region
Noncanon	1	9154623	G	A	DOID:1612 / breast cancer/HERVFA	GE	5816	MU64626477		intergenic_region
Noncanon	1	9154638	C	A	DOID:1793 / pancreatic cancer/HERVFA	GE	5816	MU5889127		intergenic_region
Noncanon	1	9154646	T	C	DOID:4159 / skin cancer/HERVFA	GE	5816	MU46352685		intergenic_region
Noncanon	1	9155366	C	G	DOID:1612 / breast cancer/HERVFA	GE	5816	MU67174555		intergenic_region
Noncanon	1	9155437	C	A	DOID:263 / kidney cancer/HERVFA	GE	5816	MU4318191		intergenic_region
Noncanon	1	9155615	G	A	DOID:4159 / skin cancer/HERVFA	GE	5816	MU59619261		intergenic_region
Noncanon	1	9155890	C	T	DOID:4159 / skin cancer/HERVFA	GE	5816	MU51187900		intergenic_region
Noncanon	1	9155894	T	C	DOID:2531 / hematologic cancer/HERVFA	GE	5816	MU1530787		intergenic_region
Noncanon	1	12764275	G	A	DOID:4159 / skin cancer/HERVIP	GE	5818	MU33516985		intergenic_region
Noncanon	1	12764315	G	A	DOID:4159 / skin cancer/HERVIP	GE	5818	MU49416655		intergenic_region
Noncanon	1	12764336	G	A	DOID:4159 / skin cancer/HERVIP	GE	5818	MU44439888		intergenic_region
Noncanon	1	12764383	G	A	DOID:4159 / skin cancer/HERVIP	GE	5818	MU55459162		intergenic_region
Noncanon	1	12764704	T	G	DOID:10283 / prostate cancer/HERVIP	GE	5818	MU56142828		intergenic_region
Noncanon	1	12764771	G	A	DOID:4159 / skin cancer/HERVIP	GE	5818	MU57773680		intergenic_region
Noncanon	1	12765023	A	G	DOID:1793 / pancreatic cancer/HERVIP	GE	5818	COSN14657466	.	.
Noncanon	1	12765060	G	A	DOID:4159 / skin cancer/HERVIP	GE	5818	MU33516998		intergenic_region
Noncanon	1	12765341	G	A	DOID:1612 / breast cancer/HERVIP	GE	5818	MU68455119		intergenic_region
Noncanon	1	12765444	T	C	DOID:2394 / ovarian cancer/HERVIP	GE	5818	MU4709461		intergenic_region
Noncanon	1	12765538	G	T	DOID:4159 / skin cancer/HERVIP	GE	5818	MU61397897		intergenic_region
Noncanon	1	12765670	G	T	DOID:4159 / skin cancer/HERVIP	GE	5818	MU47858822		intergenic_region
Noncanon	1	12765688	C	T	DOID:4159 / skin cancer/HERVIP	GE	5818	MU46061202		intergenic_region
Noncanon	1	12765872	C	T	DOID:1612 / breast cancer/HERVIP	GE	5818	MU64834725		intergenic_region
Noncanon	1	12766097	C	T	DOID:4159 / skin cancer/HERVIP	GE	5818	MU48312889		intergenic_region
Noncanon	1	12766247	C	T	DOID:4159 / skin cancer/HERVIP	GE	5818	MU52808057		intergenic_region
Noncanon	1	12766340	G	A	DOID:2394 / ovarian cancer/HERVIP	GE	5818	MU4709473		intergenic_region
Noncanon	1	12766575	G	A	DOID:4159 / skin cancer/HERVIP	GE	5818	MU61005366		intergenic_region
Noncanon	1	12766578	C	G	DOID:1612 / breast cancer/HERVIP	GE	5818	MU65761148		intergenic_region
Noncanon	1	12766749	G	A	DOID:4159 / skin cancer/HERVIP	GE	5818	MU46304803		intergenic_region
Noncanon	1	12766829	G	A	DOID:4159 / skin cancer/HERVIP	GE	5818	MU49426259		intergenic_region
Noncanon	1	12766920	C	T	DOID:2531 / hematologic cancer/HERVIP	GE	5818	MU67453925		intergenic_region
Noncanon	1	12767705	C	T	DOID:1793 / pancreatic cancer/HERVIP	GE	5818	MU4927796		intergenic_region
Noncanon	1	12768060	G	A	DOID:4159 / skin cancer/HERVIP	GE	5818	MU61761422		intergenic_region
Noncanon	1	12768146	A	G	DOID:1612 / breast cancer/HERVIP	GE	5818	MU64613764		intergenic_region
Noncanon	1	12768887	C	T	DOID:4159 / skin cancer/HERVIP	GE	5818	MU39011065		intergenic_region
Noncanon	1	12768938	C	T	DOID:4159 / skin cancer/HERVIP	GE	5818	MU46383761		intergenic_region
Noncanon	1	12768947	G	A	DOID:4159 / skin cancer/HERVIP	GE	5818	MU43541875		intergenic_region
Noncanon	1	12769034	C	T	DOID:4159 / skin cancer/HERVIP	GE	5818	MU42032519		intergenic_region
Noncanon	1	12769055	A	G	DOID:5041 / esophageal cancer/HERVIP	GE	5818	MU68961516		intergenic_region
Noncanon	1	12769086	C	T	DOID:4159 / skin cancer/HERVIP	GE	5818	MU58031373		intergenic_region
Noncanon	1	12769214	C	T	DOID:4159 / skin cancer/HERVIP	GE	5818	MU50749412		intergenic_region
Noncanon	1	12769836	C	T	DOID:4159 / skin cancer/HERVIP	GE	5818	MU52844083		intergenic_region
Noncanon	1	12769889	C	T	DOID:4159 / skin cancer/HERVIP	GE	5818	MU47521066		intergenic_region
Noncanon	1	12769913	C	T	DOID:4159 / skin cancer/HERVIP	GE	5818	MU34442325		intergenic_region
Noncanon	1	12769924	C	T	DOID:4159 / skin cancer/HERVIP	GE	5818	MU44564215		intergenic_region
Noncanon	1	12770147	C	T	DOID:4159 / skin cancer/HERVIP	GE	5818	MU58459457		intergenic_region
Noncanon	1	12770225	G	A	DOID:4159 / skin cancer/HERVIP	GE	5818	MU61138142		intergenic_region
Noncanon	1	12770266	C	A	DOID:4159 / skin cancer/HERVIP	GE	5818	MU40220257		intergenic_region
Noncanon	1	12770503	G	A	DOID:4159 / skin cancer/HERVIP	GE	5818	MU35288575		intergenic_region
Noncanon	1	12770635	C	T	DOID:1612 / breast cancer/HERVIP	GE	5818	MU64713777		intergenic_region
Noncanon	1	12770926	G	A	DOID:4159 / skin cancer/HERVIP	GE	5818	MU55326187		intergenic_region
Noncanon	1	12770927	T	C	DOID:4159 / skin cancer/HERVIP	GE	5818	MU35602470		intergenic_region
Noncanon	1	12770977	G	A	DOID:4159 / skin cancer/HERVIP	GE	5818	MU52357300		intergenic_region
Noncanon	1	12771133	T	A	DOID:1612 / breast cancer/HERVIP	GE	5818	MU64777268		intergenic_region
Noncanon	1	12771495	G	A	DOID:4159 / skin cancer/HERVIP	GE	5818	MU42645077		intergenic_region
Noncanon	1	12771592	G	A	DOID:4159 / skin cancer/HERVIP	GE	5818	MU49334193		intergenic_region
Noncanon	1	12771643	T	C	DOID:5041 / esophageal cancer/HERVIP	GE	5818	MU68236140		intergenic_region
Noncanon	1	12771669	C	T	DOID:4159 / skin cancer/HERVIP	GE	5818	MU41268314		intergenic_region
Noncanon	1	12771816	G	A	DOID:4159 / skin cancer/HERVIP	GE	5818	MU38074867		intergenic_region
Noncanon	1	12771894	C	T	DOID:4159 / skin cancer/HERVIP	GE	5818	MU53248620		intergenic_region
Noncanon	1	12771901	C	T	DOID:4159 / skin cancer/HERVIP	GE	5818	MU48702405		intergenic_region
Noncanon	1	12771918	G	A	DOID:4159 / skin cancer/HERVIP	GE	5818	MU46864414		intergenic_region
Noncanon	1	12772019	G	T	DOID:1612 / breast cancer/HERVIP	GE	5818	MU65517790		intergenic_region
Noncanon	1	12772079	C	T	DOID:4159 / skin cancer/HERVIP	GE	5818	MU49740783		intergenic_region
Noncanon	1	12772105	C	T	DOID:4159 / skin cancer/HERVIP	GE	5818	MU45415842		intergenic_region
Noncanon	1	12772159	G	A	DOID:4159 / skin cancer/HERVIP	GE	5818	MU39011069		intergenic_region
Noncanon	1	12772195	C	T	DOID:4159 / skin cancer/HERVIP	GE	5818	MU41281682		intergenic_region
Noncanon	1	12772206	C	T	DOID:4159 / skin cancer/HERVIP	GE	5818	MU56533748		intergenic_region
Noncanon	1	12772283	G	A	DOID:4159 / skin cancer/HERVIP	GE	5818	MU61464253		intergenic_region
Noncanon	1	12772628	C	T	DOID:4159 / skin cancer/HERVIP	GE	5818	MU46497445		intergenic_region
Noncanon	1	12772630	C	G	DOID:3571 / liver cancer/HERVIP	GE	5818	MU32096326		intergenic_region
Noncanon	1	12772676	C	T	DOID:4159 / skin cancer/HERVIP	GE	5818	MU62360118		intergenic_region
Noncanon	1	12772704	C	T	DOID:1793 / pancreatic cancer/HERVIP	GE	5818	MU32134581		intergenic_region
Noncanon	1	12772799	C	A	DOID:4159 / skin cancer/HERVIP	GE	5818	MU60721746		intergenic_region
Noncanon	1	12840300	A	G	DOID:1612 / breast cancer/HML2	AB	5820	MU68660489		intergenic_region
Noncanon	1	12840316	C	A	DOID:1324 / lung cancer/HML2	AB	5820	MU49718461		intergenic_region
Noncanon	1	12840318	C	G	DOID:1612 / breast cancer/HML2	AB	5820	MU68660493		intergenic_region
Noncanon	1	12840464	C	T	DOID:1324 / lung cancer/HML2	AB	5820	MU46504713		intergenic_region
Noncanon	1	12840616	G	A	DOID:4159 / skin cancer/HML2	AB	5820	MU34714216		intergenic_region
Noncanon	1	12840755	C	T	DOID:4159 / skin cancer/HML2	AB	5820	MU54904824		intergenic_region
Noncanon	1	12840928	G	C	DOID:1612 / breast cancer/HML2	AB	5820	MU63726311		intergenic_region
Noncanon	1	12840985	G	C	DOID:4159 / skin cancer/HML2	AB	5820	MU32805597		intergenic_region
Noncanon	1	12841044	G	A	DOID:3571 / liver cancer/HML2	AB	5820	MU41659504		intergenic_region
Noncanon	1	12841147	T	C	DOID:4159 / skin cancer/HML2	AB	5820	MU20096768		intergenic_region
Noncanon	1	12841238	G	A	DOID:4159 / skin cancer/HML2	AB	5820	MU71369659		intergenic_region
Noncanon	1	12841346	A	G	DOID:4159 / skin cancer/HML2	AB	5820	MU42563342		intergenic_region
Noncanon	1	12841392	C	G	DOID:1793 / pancreatic cancer/HML2	AB	5820	MU40536069		intergenic_region
Noncanon	1	12841443	A	G	DOID:4159 / skin cancer/HML2	AB	5820	MU71369660		intergenic_region
Noncanon	1	12841488	C	T	DOID:4159 / skin cancer/HML2	AB	5820	MU53035650		intergenic_region
Noncanon	1	12841835	C	T	DOID:3571 / liver cancer/HML2	AB	5820	MU2636216		intergenic_region
Noncanon	1	12841984	C	T	DOID:4159 / skin cancer/HML2	AB	5820	MU46234040		intergenic_region
Noncanon	1	12842015	A	G	DOID:10283 / prostate cancer/HML2	AB	5820	MU31754066		intergenic_region
Noncanon	1	12842113	C	T	DOID:4159 / skin cancer/HML2	AB	5820	MU60520447		intergenic_region
Noncanon	1	12842131	G	A	DOID:4159 / skin cancer/HML2	AB	5820	MU39011129		intergenic_region
Noncanon	1	12842281	A	T	DOID:1793 / pancreatic cancer/HML2	AB	5820	MU4928064		intergenic_region
Noncanon	1	12842281	A	T	DOID:4159 / skin cancer/HML2	AB	5820	MU4928064		intergenic_region
Noncanon	1	12842862	G	A	DOID:4159 / skin cancer/HML2	AB	5820	MU52661657		intergenic_region
Noncanon	1	12842927	G	T	DOID:4159 / skin cancer/HML2	AB	5820	MU71427996		intergenic_region
Noncanon	1	12842969	C	T	DOID:4159 / skin cancer/HML2	AB	5820	MU52348192		intergenic_region
Noncanon	1	12843332	C	T	DOID:4159 / skin cancer/HML2	AB	5820	MU61759717		intergenic_region
Noncanon	1	12843417	C	T	DOID:4159 / skin cancer/HML2	AB	5820	MU57942384		intergenic_region
Noncanon	1	12843503	G	A	DOID:4159 / skin cancer/HML2	AB	5820	MU47848641		intergenic_region
Noncanon	1	12843638	T	A	DOID:4159 / skin cancer/HML2	AB	5820	MU58558935		intergenic_region
Noncanon	1	12843679	C	T	DOID:4159 / skin cancer/HML2	AB	5820	MU53096497		intergenic_region
Noncanon	1	12843793	G	A	DOID:4159 / skin cancer/HML2	AB	5820	MU36247576		intergenic_region
Noncanon	1	12843814	G	A	DOID:4159 / skin cancer/HML2	AB	5820	MU40311524		intergenic_region
Noncanon	1	12843818	C	T	DOID:4159 / skin cancer/HML2	AB	5820	MU61530851		intergenic_region
Noncanon	1	12844363	A	T	DOID:3571 / liver cancer/HML2	AB	5820	MU1265148		intergenic_region
Noncanon	1	12844455	A	T	DOID:4159 / skin cancer/HML2	AB	5820	MU61759703		intergenic_region
Noncanon	1	12844484	G	A	DOID:4159 / skin cancer/HML2	AB	5820	MU52909684		intergenic_region
Noncanon	1	12844591	C	T	DOID:4159 / skin cancer/HML2	AB	5820	MU47379377		intergenic_region
Noncanon	1	12844743	C	T	DOID:4159 / skin cancer/HML2	AB	5820	MU51101856		intergenic_region
Noncanon	1	12844851	A	G	DOID:3571 / liver cancer/HML2	AB	5820	MU47360504		intergenic_region
Noncanon	1	12844963	T	G	DOID:4159 / skin cancer/HML2	AB	5820	MU60546155		intergenic_region
Noncanon	1	12844973	C	T	DOID:1612 / breast cancer/HML2	AB	5820	MU66895017		intergenic_region
Noncanon	1	12845019	C	T	DOID:4159 / skin cancer/HML2	AB	5820	MU59941208		intergenic_region
Noncanon	1	12845092	A	G	DOID:3571 / liver cancer/HML2	AB	5820	MU3014309		intergenic_region
Noncanon	1	12845094	G	A	DOID:4159 / skin cancer/HML2	AB	5820	MU45456185		intergenic_region
Noncanon	1	12845191	G	A	DOID:4159 / skin cancer/HML2	AB	5820	MU59337069		intergenic_region
Noncanon	1	12845213	G	C	DOID:4159 / skin cancer/HML2	AB	5820	MU37661246		intergenic_region
Noncanon	1	12845339	A	G	DOID:4159 / skin cancer/HML2	AB	5820	MU28646766		intergenic_region
Noncanon	1	13466278	A	G	DOID:4159 / skin cancer/HML2	AB	5824	MU35603117		intergenic_region
Noncanon	1	13467602	T	C	DOID:4159 / skin cancer/HML2	AB	5824	MU38740210		intergenic_region
Noncanon	1	13680819	C	T	DOID:4159 / skin cancer/HML2	AB	5826	MU16632173		intergenic_region
Canon	1	13886351	C	T	DOID:4159 / skin cancer/HERVH	GE	5829	MU49160611		intergenic_region
Canon	1	13886391	T	A	DOID:3571 / liver cancer/HERVH	GE	5829	MU1154487		intergenic_region
Canon	1	13886514	G	T	DOID:3571 / liver cancer/HERVH	GE	5829	MU2937256		intergenic_region
Canon	1	13886639	T	C	DOID:3571 / liver cancer/HERVH	GE	5829	MU2935079		intergenic_region
Canon	1	13886695	T	C	DOID:4159 / skin cancer/HERVH	GE	5829	MU39011371		intergenic_region
Canon	1	13886759	C	G	DOID:1612 / breast cancer/HERVH	GE	5829	MU63445208		intergenic_region
Canon	1	13887154	C	T	DOID:1793 / pancreatic cancer/HERVH	GE	5829	MU11339567		intergenic_region
Canon	1	13887406	G	A	DOID:4159 / skin cancer/HERVH	GE	5829	MU47449373		intergenic_region
Canon	1	13887417	A	C	DOID:5041 / esophageal cancer/HERVH	GE	5829	MU22554172		intergenic_region
Canon	1	13888495	C	T	DOID:4159 / skin cancer/HERVH	GE	5829	MU55738462		intergenic_region
Canon	1	13888547	C	T	DOID:1612 / breast cancer/HERVH	GE	5829	MU68059304		intergenic_region
Canon	1	13888560	G	A	DOID:4159 / skin cancer/HERVH	GE	5829	MU42613920		intergenic_region
Canon	1	13888664	C	A	DOID:1793 / pancreatic cancer/HERVH	GE	5829	MU22840651		intergenic_region
Canon	1	13888704	C	T	DOID:4159 / skin cancer/HERVH	GE	5829	MU48218954		intergenic_region
Canon	1	13889051	G	A	DOID:4159 / skin cancer/HERVH	GE	5829	MU62673555		intergenic_region
Canon	1	13889075	C	G	DOID:4159 / skin cancer/HERVH	GE	5829	MU43223380		intergenic_region
Canon	1	13889406	C	T	DOID:4159 / skin cancer/HERVH	GE	5829	MU52206924		intergenic_region
Canon	1	13889408	C	T	DOID:4159 / skin cancer/HERVH	GE	5829	MU55805570		intergenic_region
Canon	1	13889627	C	T	DOID:1793 / pancreatic cancer/HERVH	GE	5829	MU4930303		intergenic_region
Canon	1	13889656	C	T	DOID:1793 / pancreatic cancer/HERVH	GE	5829	MU29691204		intergenic_region
Canon	1	13889931	T	G	DOID:5041 / esophageal cancer/HERVH	GE	5829	MU24478531		intergenic_region
Canon	1	13889946	G	A	DOID:4159 / skin cancer/HERVH	GE	5829	MU57062835		intergenic_region
Canon	1	13890029	C	A	DOID:10283 / prostate cancer/HERVH	GE	5829	MU15058331		intergenic_region
Canon	1	13890121	C	T	DOID:4159 / skin cancer/HERVH	GE	5829	MU59408004		intergenic_region
Canon	1	13890249	G	A	DOID:5041 / esophageal cancer/HERVH	GE	5829	MU69763204		intergenic_region
Canon	1	13890252	C	A	DOID:10283 / prostate cancer/HERVH	GE	5829	MU53249944		intergenic_region
Canon	1	13890475	T	G	DOID:5041 / esophageal cancer/HERVH	GE	5829	MU15918770		intergenic_region
Canon	1	13890547	C	T	DOID:3571 / liver cancer/HERVH	GE	5829	MU31773836		intergenic_region
Canon	1	13890683	C	T	DOID:4159 / skin cancer/HERVH	GE	5829	MU60610703		intergenic_region
Canon	1	13890836	A	T	DOID:2394 / ovarian cancer/HERVH	GE	5829	MU4711220		intergenic_region
Canon	1	13890941	A	T	DOID:4159 / skin cancer/HERVH	GE	5829	MU62983003		intergenic_region
Canon	1	13891159	C	T	DOID:4159 / skin cancer/HERVH	GE	5829	MU62231178		intergenic_region
Canon	1	13891229	C	T	DOID:1612 / breast cancer/HERVH	GE	5829	MU63541579		intergenic_region
Canon	1	13891346	G	A	DOID:4159 / skin cancer/HERVH	GE	5829	MU57934963		intergenic_region
Canon	1	13891393	C	T	DOID:4159 / skin cancer/HERVH	GE	5829	MU61731671		intergenic_region
Canon	1	13891445	A	C	DOID:5041 / esophageal cancer/HERVH	GE	5829	MU34232595		intergenic_region
Canon	1	13891458	C	T	DOID:4159 / skin cancer/HERVH	GE	5829	MU58202868		intergenic_region
Canon	1	13891486	G	A	DOID:1793 / pancreatic cancer/HERVH	GE	5829	MU31876720		intergenic_region
Canon	1	13891614	C	T	DOID:1793 / pancreatic cancer/HERVH	GE	5829	MU31310531		intergenic_region
Canon	1	13891679	G	A	DOID:1319 / brain cancer/HERVH	GE	5829	MU4752378		intergenic_region
Canon	1	13891801	C	T	DOID:4159 / skin cancer/HERVH	GE	5829	MU71198297		intergenic_region
Canon	1	13891831	C	T	DOID:1793 / pancreatic cancer/HERVH	GE	5829	MU29423854		intergenic_region
Canon	1	13891860	C	G	DOID:1612 / breast cancer/HERVH	GE	5829	MU68495500		intergenic_region
Canon	1	13892192	C	A	DOID:4159 / skin cancer/HERVH	GE	5829	MU60585143		intergenic_region
Canon	1	13892214	G	A	DOID:4159 / skin cancer/HERVH	GE	5829	MU52580319		intergenic_region
Canon	1	13892304	G	T	DOID:1612 / breast cancer/HERVH	GE	5829	MU63727173		intergenic_region
Canon	1	13892341	G	A	DOID:2531 / hematologic cancer/HERVH	GE	5829	MU41023715		intergenic_region
Canon	1	13892341	G	A	DOID:4159 / skin cancer/HERVH	GE	5829	MU41023715		intergenic_region
Canon	1	13892462	C	T	DOID:4159 / skin cancer/HERVH	GE	5829	MU62378102		intergenic_region
Canon	1	13892615	C	G	DOID:3571 / liver cancer/HERVH	GE	5829	MU9296003		intergenic_region
Canon	1	13892704	C	A	DOID:1324 / lung cancer/HERVH	GE	5829	MU56904219		intergenic_region
Canon	1	13892918	T	C	DOID:1793 / pancreatic cancer/HERVH	GE	5829	MU4930347		intergenic_region
Canon	1	13893180	A	C	DOID:5041 / esophageal cancer/HERVH	GE	5829	MU19064452		intergenic_region
Canon	1	13893189	C	G	DOID:1793 / pancreatic cancer/HERVH	GE	5829	COSN16725495	.	.
Canon	1	13893193	A	G	DOID:4159 / skin cancer/HERVH	GE	5829	MU55451058		intergenic_region
Canon	1	13893259	G	A	DOID:4159 / skin cancer/HERVH	GE	5829	MU36247983		intergenic_region
Canon	1	13893400	A	G	DOID:4159 / skin cancer/HERVH	GE	5829	MU54887807		intergenic_region
Canon	1	13893419	C	T	DOID:3571 / liver cancer/HERVH	GE	5829	MU3737107		intergenic_region
Canon	1	13893605	T	G	DOID:3571 / liver cancer/HERVH	GE	5829	MU2665626		intergenic_region
Canon	1	13893633	C	T	DOID:5041 / esophageal cancer/HERVH	GE	5829	MU311266		intergenic_region
Canon	1	13894010	G	T	DOID:5041 / esophageal cancer/HERVH	GE	5829	MU371556		intergenic_region
Canon	1	13894029	G	A	DOID:4159 / skin cancer/HERVH	GE	5829	MU54733554		intergenic_region
Canon	1	13894102	G	A	DOID:4159 / skin cancer/HERVH	GE	5829	MU62767604		intergenic_region
Noncanon	1	16429312	C	T	DOID:2394 / ovarian cancer/HML2	AB	5830	MU4816486		intergenic_region
Noncanon	1	16429444	G	A	DOID:4159 / skin cancer/HML2	AB	5830	MU39012011		intergenic_region
Noncanon	1	16429807	G	A	DOID:4159 / skin cancer/HML2	AB	5830	MU47705168		intergenic_region
Noncanon	1	16429893	A	T	DOID:1793 / pancreatic cancer/HML2	AB	5830	MU11352552		intergenic_region
Noncanon	1	16429906	C	T	DOID:4159 / skin cancer/HML2	AB	5830	MU51897338		intergenic_region
Noncanon	1	16430272	C	T	DOID:4159 / skin cancer/HML2	AB	5830	MU57283626		intergenic_region
Noncanon	1	16430430	C	T	DOID:4159 / skin cancer/HML2	AB	5830	MU48484216		intergenic_region
Noncanon	1	16430494	A	G	DOID:2531 / hematologic cancer/HML2	AB	5830	MU69303970		intergenic_region
Noncanon	1	16430802	G	A	DOID:4159 / skin cancer/HML2	AB	5830	MU42613887		intergenic_region
Noncanon	1	16431100	G	A	DOID:4159 / skin cancer/HML2	AB	5830	MU59469445		intergenic_region
Noncanon	1	16431431	A	C	DOID:4159 / skin cancer/HML2	AB	5830	MU51513043		intergenic_region
Noncanon	1	16431693	C	T	DOID:2394 / ovarian cancer/HML2	AB	5830	MU4816640		intergenic_region
Noncanon	1	16432161	G	A	DOID:4159 / skin cancer/HML2	AB	5830	MU48089630		intergenic_region
Noncanon	1	16432340	A	G	DOID:4159 / skin cancer/HML2	AB	5830	MU62745790		intergenic_region
Noncanon	1	16432539	G	A	DOID:1324 / lung cancer/HML2	AB	5830	MU41663189		intergenic_region
Noncanon	1	16432657	C	T	DOID:4159 / skin cancer/HML2	AB	5830	MU54689451		intergenic_region
Noncanon	1	16432791	G	A	DOID:4159 / skin cancer/HML2	AB	5830	MU58829362		intergenic_region
Noncanon	1	16432885	T	G	DOID:4159 / skin cancer/HML2	AB	5830	MU63003670		intergenic_region
Noncanon	1	16433103	G	A	DOID:263 / kidney cancer/HML2	AB	5830	MU4066137		intergenic_region
Noncanon	1	16433183	G	A	DOID:4159 / skin cancer/HML2	AB	5830	MU40679929		intergenic_region
Noncanon	1	16433212	C	T	DOID:4159 / skin cancer/HML2	AB	5830	MU41465362		intergenic_region
Noncanon	1	16433228	C	T	DOID:4159 / skin cancer/HML2	AB	5830	MU40836410		intergenic_region
Noncanon	1	16433359	C	T	DOID:4159 / skin cancer/HML2	AB	5830	MU60776278		intergenic_region
Noncanon	1	16433429	C	T	DOID:4159 / skin cancer/HML2	AB	5830	MU46128982		intergenic_region
Noncanon	1	16433894	C	T	DOID:4159 / skin cancer/HML2	AB	5830	MU61741722		intergenic_region
Noncanon	1	16434145	G	A	DOID:4159 / skin cancer/HML2	AB	5830	MU58444093		intergenic_region
Noncanon	1	16434269	C	T	DOID:4159 / skin cancer/HML2	AB	5830	MU52528163		intergenic_region
Noncanon	1	16434432	G	A	DOID:4159 / skin cancer/HML2	AB	5830	MU38075449		intergenic_region
Noncanon	1	16434488	G	A	DOID:1612 / breast cancer/HML2	AB	5830	MU66423367		intergenic_region
Noncanon	1	16434517	C	T	DOID:10283 / prostate cancer/HML2	AB	5830	MU29177090		intergenic_region
Noncanon	1	16434569	C	T	DOID:5041 / esophageal cancer/HML2	AB	5830	MU20809191		intergenic_region
Noncanon	1	16434746	G	A	DOID:1793 / pancreatic cancer/HML2	AB	5830	MU5034480		intergenic_region
Noncanon	1	16434765	C	T	DOID:3571 / liver cancer/HML2	AB	5830	MU5057100		intergenic_region
Noncanon	1	16435043	G	A	DOID:4159 / skin cancer/HML2	AB	5830	MU61513428		intergenic_region
Noncanon	1	19593888	G	A	DOID:363 / uterine cancer/MST	S	5833	MU1841097	AKR7L	missense_variant
Noncanon	1	19594000	C	T	DOID:1612 / breast cancer/MST	S	5833	MU63819552	AKR7L	intron_variant
Noncanon	1	19595104	C	T	DOID:10534 / stomach cancer/MST	S	5833	MU4697151	AKR7L	missense_variant
Noncanon	1	19595119	G	A	DOID:1612 / breast cancer/MST	S	5833	MU1999370	AKR7L	missense_variant
Noncanon	1	19595194	A	G	DOID:1781 / thyroid cancer/MST	S	5833	MU622963	AKR7L	missense_variant
Noncanon	1	19595397	G	A	DOID:4159 / skin cancer/MST	S	5833	MU52400664	AKR7L	intron_variant
Noncanon	1	19595434	T	G	DOID:3571 / liver cancer/MST	S	5833	MU41802619	AKR7L	intron_variant
Noncanon	1	19595589	C	T	DOID:3571 / liver cancer/MST	S	5833	MU3288745	AKR7L	intron_variant
Noncanon	1	19595801	G	A	DOID:4159 / skin cancer/MST	S	5833	MU4515437	AKR7L	intron_variant
Noncanon	1	19595801	G	A	DOID:4159 / skin cancer/MST	S	5833	MU4515437	AKR7L	intron_variant
Noncanon	1	19595834	C	A	DOID:363 / uterine cancer/MST	S	5833	MU1908337	AKR7L	intron_variant
Noncanon	1	19595908	A	G	DOID:2531 / hematologic cancer/MST	S	5833	MU1593141	AKR7L	intron_variant
Noncanon	1	19596037	C	T	DOID:4159 / skin cancer/MST	S	5833	MU59050331	AKR7L	intron_variant
Noncanon	1	19596175	T	A	DOID:3571 / liver cancer/MST	S	5833	MU29630372	AKR7L	intron_variant
Noncanon	1	19596377	G	A	DOID:4159 / skin cancer/MST	S	5833	MU43315536	AKR7L	intron_variant
Noncanon	1	19596910	C	T	DOID:4159 / skin cancer/MST	S	5833	MU57027484	AKR7L	intron_variant
Noncanon	1	19596939	C	T	DOID:1612 / breast cancer/MST	S	5833	MU64285376	AKR7L	splice_region_variant
Noncanon	1	19597014	G	T	DOID:10283 / prostate cancer/MST	S	5833	MU13605283	AKR7L	missense_variant
Noncanon	1	19597040	C	T	DOID:1781 / thyroid cancer/MST	S	5833	MU4589909	AKR7L	synonymous_variant
Noncanon	1	19597040	C	T	DOID:10283 / prostate cancer/MST	S	5833	MU4589909	AKR7L	synonymous_variant
Noncanon	1	19597041	G	A	DOID:4159 / skin cancer/MST	S	5833	MU35606457	AKR7L	missense_variant
Noncanon	1	19597220	C	A	DOID:4159 / skin cancer/MST	S	5833	MU59442105	AKR7L	intron_variant
Noncanon	1	19597290	G	A	DOID:4159 / skin cancer/MST	S	5833	MU42768509	AKR7L	missense_variant
Noncanon	1	19597299	A	G	DOID:363 / uterine cancer/MST	S	5833	MU1926622	AKR7L	missense_variant
Noncanon	1	19597310	G	C	DOID:4362 / cervical cancer/MST	S	5833	COSN2376581	.	.
Noncanon	1	19597387	A	C	DOID:1793 / pancreatic cancer/MST	S	5833	MU64453664	AKR7L	5_prime_UTR_variant
Noncanon	1	19598038	G	A	DOID:3571 / liver cancer/MST	S	5833	MU48133249	AKR7L	intron_variant
Noncanon	1	19598387	G	A	DOID:5041 / esophageal cancer/MST	S	5833	MU70647500	AKR7L	intron_variant
Noncanon	1	19598814	G	A	DOID:4159 / skin cancer/MST	S	5833	MU60241017	AKR7L	intron_variant
Noncanon	1	19599035	A	G	DOID:4159 / skin cancer/MST	S	5833	MU43601556	AKR7L	intron_variant
Noncanon	1	19599152	T	C	DOID:263 / kidney cancer/MST	S	5833	MU3949338	AKR7L	intron_variant
Noncanon	1	19599338	A	G	DOID:3571 / liver cancer/MST	S	5833	MU31042621	AKR7L	intron_variant
Noncanon	1	19599370	G	A	DOID:4159 / skin cancer/MST	S	5833	MU44375224	AKR7L	intron_variant
Noncanon	1	19599542	C	A	DOID:5041 / esophageal cancer/MST	S	5833	MU371505	AKR7L	intron_variant
Noncanon	1	19599869	G	T	DOID:263 / kidney cancer/MST	S	5833	MU4260912	AKR7L	intron_variant
Noncanon	1	19600223	C	T	DOID:1612 / breast cancer/MST	S	5833	MU65056588	AKR7L	intron_variant
Noncanon	1	19600323	C	G	DOID:3571 / liver cancer/MST	S	5833	MU829583	AKR7L	intron_variant
Noncanon	1	19600330	A	G	DOID:1612 / breast cancer/MST	S	5833	MU67456435	AKR7L	intron_variant
Noncanon	1	19600839	C	T	DOID:10283 / prostate cancer/MST	S	5833	MU30803813		intergenic_region
Noncanon	1	19600975	G	C	DOID:10283 / prostate cancer/MST	S	5833	MU31642685		intergenic_region
Noncanon	1	19601123	G	A	DOID:4159 / skin cancer/MST	S	5833	MU48634054		intergenic_region
Noncanon	1	19601164	C	T	DOID:263 / kidney cancer/MST	S	5833	MU3971111		intergenic_region
Noncanon	1	19601928	G	A	DOID:2394 / ovarian cancer/MST	S	5833	MU4989058		intergenic_region
Noncanon	1	19602795	C	T	DOID:1612 / breast cancer/MST	S	5833	MU67061726		intergenic_region
Noncanon	1	19603866	G	A	DOID:4159 / skin cancer/MST	S	5833	MU39222308		intergenic_region
Noncanon	1	19603999	C	G	DOID:1612 / breast cancer/MST	S	5833	MU64956201		intergenic_region
Noncanon	1	19604645	G	A	DOID:4159 / skin cancer/MST	S	5833	MU48452923		intergenic_region
Noncanon	1	19605135	G	C	DOID:1324 / lung cancer/MST	S	5833	MU46520469		intergenic_region
Noncanon	1	19605851	T	C	DOID:1612 / breast cancer/MST	S	5833	COSN21812693	.	.
Noncanon	1	19606201	C	T	DOID:4159 / skin cancer/MST	S	5833	MU61329014		intergenic_region
Noncanon	1	19606327	A	T	DOID:3571 / liver cancer/MST	S	5833	MU3092857		intergenic_region
Noncanon	1	19606505	G	A	DOID:4159 / skin cancer/MST	S	5833	MU54563206		intergenic_region
Noncanon	1	19606873	G	A	DOID:4159 / skin cancer/MST	S	5833	MU42650637		intergenic_region
Noncanon	1	19607817	G	A	DOID:4159 / skin cancer/MST	S	5833	MU56667582		intergenic_region
Noncanon	1	19608056	G	A	DOID:4159 / skin cancer/MST	S	5833	MU58495003		intergenic_region
Noncanon	1	19608425	T	C	DOID:1612 / breast cancer/MST	S	5833	MU66804074		intergenic_region
Noncanon	1	19608989	T	G	DOID:1324 / lung cancer/MST	S	5833	MU30361677		intergenic_region
Noncanon	1	19609049	G	C	DOID:1612 / breast cancer/MST	S	5833	MU63793803		intergenic_region
Noncanon	1	19609791	G	C	DOID:1612 / breast cancer/MST	S	5833	MU65081112	AKR7A3	intron_variant
Noncanon	1	19609850	G	A	DOID:4159 / skin cancer/MST	S	5833	MU39493153	AKR7A3	intron_variant
Canon	1	19868249	C	T	DOID:4159 / skin cancer/HML3	AB	5835	MU53710862		intergenic_region
Canon	1	19868352	G	A	DOID:4159 / skin cancer/HML3	AB	5835	MU56571219		intergenic_region
Canon	1	19868560	G	A	DOID:4159 / skin cancer/HML3	AB	5835	MU47333972		intergenic_region
Canon	1	19868623	G	A	DOID:4159 / skin cancer/HML3	AB	5835	MU57866735		intergenic_region
Canon	1	19868930	T	C	DOID:1612 / breast cancer/HML3	AB	5835	MU66221342		intergenic_region
Canon	1	19869329	T	G	DOID:4159 / skin cancer/HML3	AB	5835	MU44022752		intergenic_region
Canon	1	19869336	G	A	DOID:4159 / skin cancer/HML3	AB	5835	MU40967619		intergenic_region
Canon	1	19869502	G	A	DOID:4159 / skin cancer/HML3	AB	5835	MU47762059		intergenic_region
Canon	1	19869508	G	A	DOID:4159 / skin cancer/HML3	AB	5835	MU51222191		intergenic_region
Canon	1	19869918	G	A	DOID:2394 / ovarian cancer/HML3	AB	5835	MU5004442		intergenic_region
Canon	1	19869931	G	A	DOID:4159 / skin cancer/HML3	AB	5835	MU51931104		intergenic_region
Canon	1	19870013	G	A	DOID:4159 / skin cancer/HML3	AB	5835	MU55988677		intergenic_region
Canon	1	19870120	G	C	DOID:1612 / breast cancer/HML3	AB	5835	MU64941959		intergenic_region
Canon	1	19870617	G	A	DOID:4159 / skin cancer/HML3	AB	5835	MU45935555		intergenic_region
Canon	1	19870768	G	C	DOID:5041 / esophageal cancer/HML3	AB	5835	MU70629271		intergenic_region
Canon	1	19871359	G	A	DOID:4159 / skin cancer/HML3	AB	5835	MU62653395		intergenic_region
Canon	1	19871416	G	A	DOID:4159 / skin cancer/HML3	AB	5835	MU58921901		intergenic_region
Canon	1	19872361	A	G	DOID:4159 / skin cancer/HML3	AB	5835	MU41883823		intergenic_region
Canon	1	19872424	G	A	DOID:1319 / brain cancer/HML3	AB	5835	MU4792110		intergenic_region
Canon	1	19873091	C	T	DOID:4159 / skin cancer/HML3	AB	5835	MU60891549		intergenic_region
Canon	1	19873118	G	A	DOID:1612 / breast cancer/HML3	AB	5835	MU66105345		intergenic_region
Canon	1	19873352	G	A	DOID:4159 / skin cancer/HML3	AB	5835	MU43019953		intergenic_region
Canon	1	19873809	G	A	DOID:3571 / liver cancer/HML3	AB	5835	MU958505		intergenic_region
Canon	1	19874068	C	A	DOID:4159 / skin cancer/HML3	AB	5835	MU42332571		intergenic_region
Noncanon	1	20253468	C	A	DOID:1612 / breast cancer/HML9	AB	5836	MU68059618		intergenic_region
Noncanon	1	20253523	T	G	DOID:4159 / skin cancer/HML9	AB	5836	MU55501764		intergenic_region
Noncanon	1	20253931	C	T	DOID:4159 / skin cancer/HML9	AB	5836	MU51482662		intergenic_region
Noncanon	1	20253988	A	T	DOID:4159 / skin cancer/HML9	AB	5836	MU37661522		intergenic_region
Noncanon	1	20254037	A	G	DOID:3571 / liver cancer/HML9	AB	5836	MU5334352		intergenic_region
Noncanon	1	20254112	C	T	DOID:5041 / esophageal cancer/HML9	AB	5836	MU70301225		intergenic_region
Noncanon	1	20254266	T	C	DOID:3571 / liver cancer/HML9	AB	5836	COSN1426827	.	.
Noncanon	1	20254356	C	T	DOID:3571 / liver cancer/HML9	AB	5836	MU2278132		intergenic_region
Noncanon	1	20254794	C	T	DOID:4159 / skin cancer/HML9	AB	5836	MU53152958		intergenic_region
Noncanon	1	20254877	C	G	DOID:4159 / skin cancer/HML9	AB	5836	MU46811271		intergenic_region
Noncanon	1	20255073	G	A	DOID:4159 / skin cancer/HML9	AB	5836	MU60290847		intergenic_region
Noncanon	1	20255223	C	T	DOID:4159 / skin cancer/HML9	AB	5836	MU52572737		intergenic_region
Noncanon	1	20255305	A	G	DOID:1319 / brain cancer/HML9	AB	5836	MU4794868		intergenic_region
Noncanon	1	20255532	C	T	DOID:4159 / skin cancer/HML9	AB	5836	MU49590543		intergenic_region
Noncanon	1	20255874	C	T	DOID:4159 / skin cancer/HML9	AB	5836	MU42391136		intergenic_region
Noncanon	1	20255892	C	T	DOID:4159 / skin cancer/HML9	AB	5836	MU61841745		intergenic_region
Noncanon	1	20256250	C	T	DOID:4159 / skin cancer/HML9	AB	5836	MU43561251		intergenic_region
Noncanon	1	20256275	A	G	DOID:4159 / skin cancer/HML9	AB	5836	MU48401429		intergenic_region
Noncanon	1	20256344	C	T	DOID:4159 / skin cancer/HML9	AB	5836	MU56697621		intergenic_region
Noncanon	1	20256345	C	T	DOID:4159 / skin cancer/HML9	AB	5836	MU49549737		intergenic_region
Noncanon	1	20256909	C	A	DOID:2394 / ovarian cancer/HML9	AB	5836	MU5022642		intergenic_region
Noncanon	1	20257770	C	A	DOID:1319 / brain cancer/HML9	AB	5836	MU68859964		intergenic_region
Noncanon	1	20258224	C	T	DOID:4159 / skin cancer/HML9	AB	5836	MU48698951		intergenic_region
Noncanon	1	20258336	C	G	DOID:4159 / skin cancer/HML9	AB	5836	MU55343286		intergenic_region
Noncanon	1	20258340	C	T	DOID:4159 / skin cancer/HML9	AB	5836	MU49623934		intergenic_region
Noncanon	1	20258357	C	T	DOID:4159 / skin cancer/HML9	AB	5836	MU45103967		intergenic_region
Noncanon	1	20258378	C	A	DOID:1793 / pancreatic cancer/HML9	AB	5836	MU5290271		intergenic_region
Noncanon	1	20258397	G	A	DOID:4159 / skin cancer/HML9	AB	5836	MU50577866		intergenic_region
Noncanon	1	20258428	T	G	DOID:5041 / esophageal cancer/HML9	AB	5836	MU28194620		intergenic_region
Noncanon	1	20258438	C	A	DOID:1612 / breast cancer/HML9	AB	5836	MU64340389		intergenic_region
Noncanon	1	20258559	C	T	DOID:2531 / hematologic cancer/HML9	AB	5836	MU1614623		intergenic_region
Noncanon	1	20258587	C	T	DOID:4159 / skin cancer/HML9	AB	5836	MU54703233		intergenic_region
Noncanon	1	20258594	T	C	DOID:4159 / skin cancer/HML9	AB	5836	MU34445201		intergenic_region
Noncanon	1	20258596	C	T	DOID:4159 / skin cancer/HML9	AB	5836	MU62336189		intergenic_region
Noncanon	1	20258740	A	T	DOID:4159 / skin cancer/HML9	AB	5836	MU45358536		intergenic_region
Noncanon	1	20258907	T	C	DOID:10283 / prostate cancer/HML9	AB	5836	MU16235767		intergenic_region
Noncanon	1	20259000	C	T	DOID:4159 / skin cancer/HML9	AB	5836	MU63082757		intergenic_region
Noncanon	1	20259007	C	T	DOID:4159 / skin cancer/HML9	AB	5836	MU44449034		intergenic_region
Noncanon	1	20259132	C	T	DOID:1793 / pancreatic cancer/HML9	AB	5836	MU40489519		intergenic_region
Canon	1	20322623	G	A	DOID:4159 / skin cancer/HML3	AB	5837	MU44174880		intergenic_region
Canon	1	20322630	C	T	DOID:4159 / skin cancer/HML3	AB	5837	MU61608875		intergenic_region
Canon	1	20322850	C	T	DOID:1324 / lung cancer/HML3	AB	5837	MU52204364		intergenic_region
Canon	1	20323843	G	A	DOID:4159 / skin cancer/HML3	AB	5837	MU55769253		intergenic_region
Canon	1	20324201	A	G	DOID:5041 / esophageal cancer/HML3	AB	5837	MU578134		intergenic_region
Canon	1	20324397	C	T	DOID:1793 / pancreatic cancer/HML3	AB	5837	MU5293210		intergenic_region
Canon	1	20324705	G	A	DOID:4159 / skin cancer/HML3	AB	5837	MU59995095		intergenic_region
Canon	1	20324899	G	A	DOID:4159 / skin cancer/HML3	AB	5837	MU39523886		intergenic_region
Canon	1	20324944	G	A	DOID:4159 / skin cancer/HML3	AB	5837	MU39493160		intergenic_region
Canon	1	20324997	A	C	DOID:1793 / pancreatic cancer/HML3	AB	5837	MU5293247		intergenic_region
Canon	1	20325109	G	A	DOID:4159 / skin cancer/HML3	AB	5837	MU44589022		intergenic_region
Canon	1	20325124	A	C	DOID:4159 / skin cancer/HML3	AB	5837	MU60274182		intergenic_region
Canon	1	20326252	C	T	DOID:4159 / skin cancer/HML3	AB	5837	MU55033104		intergenic_region
Canon	1	20326252	C	A	DOID:8618 / oral cavity cancer/HML3	AB	5837	MU67626840		intergenic_region
Canon	1	20326420	A	G	DOID:2394 / ovarian cancer/HML3	AB	5837	MU5025400		intergenic_region
Canon	1	20326705	C	T	DOID:4159 / skin cancer/HML3	AB	5837	MU40812223		intergenic_region
Canon	1	20326743	A	G	DOID:4159 / skin cancer/HML3	AB	5837	MU50621732		intergenic_region
Canon	1	20327138	C	T	DOID:4159 / skin cancer/HML3	AB	5837	MU53063876		intergenic_region
Canon	1	20327243	G	A	DOID:4159 / skin cancer/HML3	AB	5837	MU55648573		intergenic_region
Canon	1	20327265	C	T	DOID:4159 / skin cancer/HML3	AB	5837	MU58155954		intergenic_region
Canon	1	20327352	C	T	DOID:4159 / skin cancer/HML3	AB	5837	MU55531186		intergenic_region
Canon	1	20327370	C	T	DOID:4159 / skin cancer/HML3	AB	5837	MU53998384		intergenic_region
Canon	1	20327541	C	T	DOID:4159 / skin cancer/HML3	AB	5837	MU52854720		intergenic_region
Canon	1	20327956	G	A	DOID:1793 / pancreatic cancer/HML3	AB	5837	MU29754181		intergenic_region
Canon	1	20328337	G	A	DOID:4159 / skin cancer/HML3	AB	5837	MU38076179		intergenic_region
Canon	1	20328393	G	T	DOID:4159 / skin cancer/HML3	AB	5837	MU51785086		intergenic_region
Canon	1	20329127	G	A	DOID:4159 / skin cancer/HML3	AB	5837	MU49627709		intergenic_region
Canon	1	20329198	C	T	DOID:4159 / skin cancer/HML3	AB	5837	MU38793571		intergenic_region
Canon	1	20329267	C	T	DOID:4159 / skin cancer/HML3	AB	5837	MU44815785		intergenic_region
Canon	1	20329353	G	A	DOID:4159 / skin cancer/HML3	AB	5837	MU60416032		intergenic_region
Canon	1	20330008	G	A	DOID:4159 / skin cancer/HML3	AB	5837	MU49687007		intergenic_region
Canon	1	20330122	C	A	DOID:2394 / ovarian cancer/HML3	AB	5837	MU5025661		intergenic_region
Noncanon	1	20356539	C	T	DOID:4159 / skin cancer/LTR46	GE	5839	MU41624333	PLA2G5	intron_variant
Noncanon	1	20356559	C	T	DOID:4159 / skin cancer/LTR46	GE	5839	MU59543783	PLA2G5	intron_variant
Noncanon	1	20356560	G	A	DOID:1793 / pancreatic cancer/LTR46	GE	5839	MU11384509	PLA2G5	intron_variant
Noncanon	1	20356582	G	A	DOID:4159 / skin cancer/LTR46	GE	5839	MU45464848	PLA2G5	intron_variant
Noncanon	1	20356653	C	T	DOID:1793 / pancreatic cancer/LTR46	GE	5839	MU5294640	PLA2G5	intron_variant
Noncanon	1	20356686	C	T	DOID:4159 / skin cancer/LTR46	GE	5839	MU58584566	PLA2G5	intron_variant
Noncanon	1	20356853	G	C	DOID:8618 / oral cavity cancer/LTR46	GE	5839	MU68003740	PLA2G5	intron_variant
Noncanon	1	20357119	C	G	DOID:1793 / pancreatic cancer/LTR46	GE	5839	MU11384524	PLA2G5	intron_variant
Noncanon	1	20357164	G	A	DOID:4159 / skin cancer/LTR46	GE	5839	MU62385743	PLA2G5	intron_variant
Noncanon	1	20357256	G	A	DOID:4159 / skin cancer/LTR46	GE	5839	MU58099788	PLA2G5	intron_variant
Noncanon	1	20357744	G	A	DOID:4159 / skin cancer/LTR46	GE	5839	MU43245227	PLA2G5	intron_variant
Noncanon	1	20357864	G	T	DOID:3571 / liver cancer/LTR46	GE	5839	MU990549	PLA2G5	intron_variant
Noncanon	1	20357870	G	A	DOID:4159 / skin cancer/LTR46	GE	5839	MU59032896	PLA2G5	intron_variant
Noncanon	1	20357887	C	T	DOID:4159 / skin cancer/LTR46	GE	5839	MU60101418	PLA2G5	intron_variant
Noncanon	1	20357999	G	A	DOID:4159 / skin cancer/LTR46	GE	5839	MU46889513	PLA2G5	intron_variant
Noncanon	1	20358143	G	A	DOID:4159 / skin cancer/LTR46	GE	5839	MU50212084	PLA2G5	intron_variant
Noncanon	1	20358589	G	A	DOID:4159 / skin cancer/LTR46	GE	5839	MU59248965	PLA2G5	intron_variant
Noncanon	1	20358871	G	A	DOID:4159 / skin cancer/LTR46	GE	5839	MU42876337	PLA2G5	intron_variant
Noncanon	1	20359069	A	G	DOID:4159 / skin cancer/LTR46	GE	5839	MU56792835	PLA2G5	intron_variant
Noncanon	1	20359101	G	A	DOID:4159 / skin cancer/LTR46	GE	5839	MU45302331	PLA2G5	intron_variant
Noncanon	1	20359505	C	G	DOID:1793 / pancreatic cancer/LTR46	GE	5839	MU11384548	PLA2G5	intron_variant
Noncanon	1	20359511	T	C	DOID:2394 / ovarian cancer/LTR46	GE	5839	MU5027017	PLA2G5	intron_variant
Noncanon	1	20359583	C	T	DOID:4159 / skin cancer/LTR46	GE	5839	MU59611735	PLA2G5	intron_variant
Noncanon	1	20360202	T	C	DOID:3571 / liver cancer/LTR46	GE	5839	MU29199128	PLA2G5	intron_variant
Noncanon	1	20360256	T	G	DOID:2394 / ovarian cancer/LTR46	GE	5839	MU5027035	PLA2G5	intron_variant
Noncanon	1	20360262	G	A	DOID:4159 / skin cancer/LTR46	GE	5839	MU43840506	PLA2G5	intron_variant
Noncanon	1	20360573	G	A	DOID:263 / kidney cancer/LTR46	GE	5839	MU4068819	PLA2G5	intron_variant
Noncanon	1	20360735	C	T	DOID:4159 / skin cancer/LTR46	GE	5839	MU55412695	PLA2G5	intron_variant
Noncanon	1	20360761	C	A	DOID:1793 / pancreatic cancer/LTR46	GE	5839	MU5294767	PLA2G5	intron_variant
Noncanon	1	20360767	G	A	DOID:4159 / skin cancer/LTR46	GE	5839	MU55319879	PLA2G5	intron_variant
Canon	1	20367991	T	C	DOID:5041 / esophageal cancer/HERVH	GE	5838	MU36235717	PLA2G5	intron_variant
Canon	1	20368169	G	A	DOID:4159 / skin cancer/HERVH	GE	5838	MU35606875	PLA2G5	intron_variant
Canon	1	20368320	G	A	DOID:4159 / skin cancer/HERVH	GE	5838	MU58039438	PLA2G5	intron_variant
Canon	1	20368816	G	A	DOID:4159 / skin cancer/HERVH	GE	5838	MU47134697	PLA2G5	intron_variant
Canon	1	20369349	G	A	DOID:4159 / skin cancer/HERVH	GE	5838	MU43008300	PLA2G5	intron_variant
Canon	1	20369353	G	A	DOID:4159 / skin cancer/HERVH	GE	5838	MU55142079	PLA2G5	intron_variant
Canon	1	20369441	G	A	DOID:5041 / esophageal cancer/HERVH	GE	5838	MU21770250	PLA2G5	intron_variant
Canon	1	20369498	C	A	DOID:1612 / breast cancer/HERVH	GE	5838	MU64263584	PLA2G5	intron_variant
Canon	1	20370220	A	C	DOID:1612 / breast cancer/HERVH	GE	5838	MU66330127	PLA2G5	intron_variant
Canon	1	20370289	G	A	DOID:4159 / skin cancer/HERVH	GE	5838	MU44866348	PLA2G5	intron_variant
Canon	1	20370752	T	G	DOID:4159 / skin cancer/HERVH	GE	5838	MU40311939	PLA2G5	intron_variant
Canon	1	20370847	G	A	DOID:4159 / skin cancer/HERVH	GE	5838	MU42062009	PLA2G5	intron_variant
Canon	1	20370862	T	G	DOID:5041 / esophageal cancer/HERVH	GE	5838	MU37366177	PLA2G5	intron_variant
Canon	1	20371340	C	T	DOID:4159 / skin cancer/HERVH	GE	5838	MU59372885	PLA2G5	intron_variant
Canon	1	20371354	G	A	DOID:4159 / skin cancer/HERVH	GE	5838	MU52023946	PLA2G5	intron_variant
Canon	1	20371423	G	A	DOID:4159 / skin cancer/HERVH	GE	5838	MU50982106	PLA2G5	intron_variant
Canon	1	20371515	G	A	DOID:1793 / pancreatic cancer/HERVH	GE	5838	MU5295086	PLA2G5	intron_variant
Canon	1	20371860	G	A	DOID:4159 / skin cancer/HERVH	GE	5838	MU58697413	PLA2G5	intron_variant
Canon	1	20372039	G	A	DOID:4159 / skin cancer/HERVH	GE	5838	MU44531540	PLA2G5	intron_variant
Canon	1	20480501	G	A	DOID:4159 / skin cancer/HERVE	GE	5840	MU59929339		intergenic_region
Canon	1	20480835	G	A	DOID:4159 / skin cancer/HERVE	GE	5840	MU48472980	PLA2G2F	downstream_gene_variant
Canon	1	20480894	T	C	DOID:1612 / breast cancer/HERVE	GE	5840	MU66804116	PLA2G2F	downstream_gene_variant
Canon	1	20481097	G	A	DOID:4159 / skin cancer/HERVE	GE	5840	MU50387443	PLA2G2F	downstream_gene_variant
Canon	1	20481173	C	T	DOID:1612 / breast cancer/HERVE	GE	5840	MU64001308	PLA2G2F	downstream_gene_variant
Canon	1	20481190	T	C	DOID:1612 / breast cancer/HERVE	GE	5840	MU64001311	PLA2G2F	downstream_gene_variant
Canon	1	20481397	G	A	DOID:4159 / skin cancer/HERVE	GE	5840	MU56239166	PLA2G2F	downstream_gene_variant
Canon	1	20481529	C	T	DOID:4159 / skin cancer/HERVE	GE	5840	MU51700116	PLA2G2F	downstream_gene_variant
Canon	1	20481578	G	A	DOID:4159 / skin cancer/HERVE	GE	5840	MU49637218	PLA2G2F	downstream_gene_variant
Canon	1	20481660	T	C	DOID:3571 / liver cancer/HERVE	GE	5840	MU29070634	PLA2G2F	downstream_gene_variant
Canon	1	20481721	G	A	DOID:4159 / skin cancer/HERVE	GE	5840	MU46001776	PLA2G2F	downstream_gene_variant
Canon	1	20482036	C	T	DOID:4159 / skin cancer/HERVE	GE	5840	MU58189825	RP3-340N1.2	intron_variant
Canon	1	20482339	G	A	DOID:4159 / skin cancer/HERVE	GE	5840	MU61875059	RP3-340N1.2	intron_variant
Canon	1	20482441	G	C	DOID:1793 / pancreatic cancer/HERVE	GE	5840	MU5299631	RP3-340N1.2	intron_variant
Canon	1	20482772	G	A	DOID:4159 / skin cancer/HERVE	GE	5840	MU63131627	RP3-340N1.2	intron_variant
Canon	1	20482871	G	T	DOID:4159 / skin cancer/HERVE	GE	5840	MU34445407	RP3-340N1.2	intron_variant
Canon	1	20482946	G	A	DOID:4159 / skin cancer/HERVE	GE	5840	MU47958328	RP3-340N1.2	intron_variant
Canon	1	20482982	G	A	DOID:4159 / skin cancer/HERVE	GE	5840	MU34445416	RP3-340N1.2	intron_variant
Canon	1	20483367	C	T	DOID:4159 / skin cancer/HERVE	GE	5840	MU56226115	RP3-340N1.2	intron_variant
Canon	1	20483946	G	A	DOID:4159 / skin cancer/HERVE	GE	5840	MU61961342	RP3-340N1.2	intron_variant
Canon	1	20484308	C	T	DOID:1612 / breast cancer/HERVE	GE	5840	MU65012204	RP3-340N1.2	intron_variant
Canon	1	20484907	C	T	DOID:4159 / skin cancer/HERVE	GE	5840	MU57957641	RP3-340N1.2	intron_variant
Canon	1	20484997	C	T	DOID:4159 / skin cancer/HERVE	GE	5840	MU50490736	RP3-340N1.2	intron_variant
Canon	1	20485565	G	T	DOID:5041 / esophageal cancer/HERVE	GE	5840	MU35242099	PLA2G2C	downstream_gene_variant
Canon	1	20485611	G	A	DOID:4159 / skin cancer/HERVE	GE	5840	MU42173276	PLA2G2C	downstream_gene_variant
Canon	1	20485650	G	A	DOID:1324 / lung cancer/HERVE	GE	5840	MU21907858	PLA2G2C	downstream_gene_variant
Canon	1	20485749	G	A	DOID:4159 / skin cancer/HERVE	GE	5840	MU43523492	PLA2G2C	downstream_gene_variant
Canon	1	20485884	G	A	DOID:4159 / skin cancer/HERVE	GE	5840	MU53317853	PLA2G2C	downstream_gene_variant
Canon	1	20486347	C	T	DOID:4159 / skin cancer/HERVE	GE	5840	MU40907945	PLA2G2C	downstream_gene_variant
Canon	1	20486387	A	C	DOID:1612 / breast cancer/HERVE	GE	5840	MU64213958	PLA2G2C	downstream_gene_variant
Canon	1	20486400	T	A	DOID:5041 / esophageal cancer/HERVE	GE	5840	MU34232799	PLA2G2C	downstream_gene_variant
Canon	1	20486801	G	A	DOID:4159 / skin cancer/HERVE	GE	5840	MU45282124	PLA2G2C	downstream_gene_variant
Canon	1	21716490	C	T	DOID:4159 / skin cancer/HUERSP1	GE	5841	MU55799458		intergenic_region
Canon	1	21716508	C	T	DOID:3571 / liver cancer/HUERSP1	GE	5841	MU28521203		intergenic_region
Canon	1	21716996	C	T	DOID:4159 / skin cancer/HUERSP1	GE	5841	MU44774577		intergenic_region
Canon	1	21717153	G	A	DOID:4159 / skin cancer/HUERSP1	GE	5841	MU62114020		intergenic_region
Canon	1	21717271	A	G	DOID:4159 / skin cancer/HUERSP1	GE	5841	MU46949110		intergenic_region
Canon	1	21717913	G	T	DOID:3571 / liver cancer/HUERSP1	GE	5841	MU53699826		intergenic_region
Canon	1	21717956	C	T	DOID:4159 / skin cancer/HUERSP1	GE	5841	MU47971020		intergenic_region
Canon	1	21718064	G	A	DOID:4159 / skin cancer/HUERSP1	GE	5841	MU58237436		intergenic_region
Canon	1	21718083	A	G	DOID:3571 / liver cancer/HUERSP1	GE	5841	MU5410479		intergenic_region
Canon	1	21718558	C	T	DOID:4159 / skin cancer/HUERSP1	GE	5841	MU58249266		intergenic_region
Canon	1	21718691	G	A	DOID:5041 / esophageal cancer/HUERSP1	GE	5841	MU70096818		intergenic_region
Canon	1	21718749	G	A	DOID:4159 / skin cancer/HUERSP1	GE	5841	MU44858499		intergenic_region
Canon	1	21718840	C	T	DOID:4159 / skin cancer/HUERSP1	GE	5841	MU47438564		intergenic_region
Canon	1	21718868	G	A	DOID:4159 / skin cancer/HUERSP1	GE	5841	MU42672683		intergenic_region
Canon	1	21718985	G	A	DOID:3571 / liver cancer/HUERSP1	GE	5841	MU30861160		intergenic_region
Canon	1	21719247	G	A	DOID:4159 / skin cancer/HUERSP1	GE	5841	MU49606753		intergenic_region
Canon	1	21719359	G	A	DOID:4159 / skin cancer/HUERSP1	GE	5841	MU50607694		intergenic_region
Canon	1	21720258	C	T	DOID:4159 / skin cancer/HUERSP1	GE	5841	MU62296384		intergenic_region
Canon	1	21720591	C	T	DOID:3571 / liver cancer/HUERSP1	GE	5841	MU5410820		intergenic_region
Canon	1	21720647	G	A	DOID:4159 / skin cancer/HUERSP1	GE	5841	MU53523906		intergenic_region
Canon	1	21720797	G	A	DOID:4159 / skin cancer/HUERSP1	GE	5841	MU54158645		intergenic_region
Canon	1	21721097	G	A	DOID:4159 / skin cancer/HUERSP1	GE	5841	MU56653568		intergenic_region
Canon	1	21721217	C	T	DOID:4159 / skin cancer/HUERSP1	GE	5841	MU51858882		intergenic_region
Canon	1	21721421	T	C	DOID:4159 / skin cancer/HUERSP1	GE	5841	MU53523891		intergenic_region
Canon	1	21721588	G	A	DOID:1793 / pancreatic cancer/HUERSP1	GE	5841	MU19117476		intergenic_region
Canon	1	21721618	G	A	DOID:4159 / skin cancer/HUERSP1	GE	5841	MU52304338		intergenic_region
Canon	1	21722694	G	A	DOID:4159 / skin cancer/HUERSP1	GE	5841	MU49763082		intergenic_region
Canon	1	21722845	C	T	DOID:4159 / skin cancer/HUERSP1	GE	5841	MU60918869		intergenic_region
Canon	1	21723606	T	C	DOID:2394 / ovarian cancer/HUERSP1	GE	5841	MU5089104		intergenic_region
Canon	1	21724054	C	T	DOID:4159 / skin cancer/HUERSP1	GE	5841	MU45080619		intergenic_region
Canon	1	21724877	C	T	DOID:4159 / skin cancer/HUERSP1	GE	5841	MU42231626		intergenic_region
Canon	1	21724895	A	G	DOID:3571 / liver cancer/HUERSP1	GE	5841	MU2544232		intergenic_region
Canon	1	21725141	A	T	DOID:2531 / hematologic cancer/HUERSP1	GE	5841	MU45485786		intergenic_region
Canon	1	21725148	C	T	DOID:1793 / pancreatic cancer/HUERSP1	GE	5841	MU5362162		intergenic_region
Canon	1	21725621	G	A	DOID:4159 / skin cancer/HUERSP1	GE	5841	MU51984070		intergenic_region
Canon	1	21725979	G	A	DOID:4159 / skin cancer/HUERSP1	GE	5841	MU46675008		intergenic_region
Canon	1	21726366	C	T	DOID:4159 / skin cancer/HUERSP1	GE	5841	MU55362556		intergenic_region
Canon	1	21726913	G	A	DOID:4159 / skin cancer/HUERSP1	GE	5841	MU61780489		intergenic_region
Canon	1	21727760	G	A	DOID:4159 / skin cancer/HUERSP1	GE	5841	MU41894363		intergenic_region
Canon	1	21727847	C	T	DOID:5041 / esophageal cancer/HUERSP1	GE	5841	MU18446587		intergenic_region
Canon	1	21728316	C	T	DOID:4159 / skin cancer/HUERSP1	GE	5841	MU55833934		intergenic_region
Canon	1	21728378	C	T	DOID:4159 / skin cancer/HUERSP1	GE	5841	MU54657786		intergenic_region
Canon	1	23324737	G	A	DOID:4159 / skin cancer/HERVH	GE	5842	MU50465829		intergenic_region
Canon	1	23325342	G	A	DOID:4159 / skin cancer/HERVH	GE	5842	MU41062739		intergenic_region
Canon	1	23325465	G	C	DOID:1612 / breast cancer/HERVH	GE	5842	MU67014143		intergenic_region
Canon	1	23325465	G	A	DOID:4159 / skin cancer/HERVH	GE	5842	MU40881835		intergenic_region
Canon	1	23325609	C	T	DOID:4159 / skin cancer/HERVH	GE	5842	MU45812984		intergenic_region
Canon	1	23326076	C	T	DOID:4159 / skin cancer/HERVH	GE	5842	MU48330524		intergenic_region
Canon	1	23326136	G	A	DOID:4159 / skin cancer/HERVH	GE	5842	MU43032417		intergenic_region
Canon	1	23326269	C	T	DOID:4159 / skin cancer/HERVH	GE	5842	MU52294764		intergenic_region
Canon	1	23326316	G	A	DOID:4159 / skin cancer/HERVH	GE	5842	MU58847177		intergenic_region
Canon	1	23326717	C	T	DOID:4159 / skin cancer/HERVH	GE	5842	MU51102822		intergenic_region
Canon	1	23327107	G	A	DOID:4159 / skin cancer/HERVH	GE	5842	MU41499534		intergenic_region
Canon	1	23327117	G	A	DOID:4159 / skin cancer/HERVH	GE	5842	MU50867216		intergenic_region
Canon	1	23327125	C	T	DOID:4159 / skin cancer/HERVH	GE	5842	MU44960412		intergenic_region
Canon	1	23327404	T	G	DOID:10283 / prostate cancer/HERVH	GE	5842	MU56827491		intergenic_region
Canon	1	23327623	C	T	DOID:2394 / ovarian cancer/HERVH	GE	5842	MU5161416		intergenic_region
Canon	1	23327736	C	T	DOID:3571 / liver cancer/HERVH	GE	5842	MU1277611		intergenic_region
Canon	1	23327962	G	A	DOID:4159 / skin cancer/HERVH	GE	5842	MU54338463		intergenic_region
Canon	1	23328091	G	A	DOID:4159 / skin cancer/HERVH	GE	5842	MU60660637		intergenic_region
Canon	1	23328322	G	A	DOID:4159 / skin cancer/HERVH	GE	5842	MU59480144		intergenic_region
Canon	1	23328464	G	A	DOID:4159 / skin cancer/HERVH	GE	5842	MU51769667		intergenic_region
Canon	1	23328554	G	A	DOID:4159 / skin cancer/HERVH	GE	5842	MU52518741		intergenic_region
Canon	1	23328584	G	A	DOID:4159 / skin cancer/HERVH	GE	5842	MU56319296		intergenic_region
Canon	1	23328592	A	G	DOID:1793 / pancreatic cancer/HERVH	GE	5842	MU11403805		intergenic_region
Canon	1	23328930	G	A	DOID:4159 / skin cancer/HERVH	GE	5842	MU35608308		intergenic_region
Canon	1	23329096	C	T	DOID:4159 / skin cancer/HERVH	GE	5842	MU62672945		intergenic_region
Canon	1	23329511	G	A	DOID:4159 / skin cancer/HERVH	GE	5842	MU49710610		intergenic_region
Canon	1	23329754	T	C	DOID:5041 / esophageal cancer/HERVH	GE	5842	MU36236520		intergenic_region
Canon	1	23329763	T	C	DOID:1793 / pancreatic cancer/HERVH	GE	5842	MU11403817		intergenic_region
Canon	1	23329981	C	T	DOID:3571 / liver cancer/HERVH	GE	5842	MU5493314		intergenic_region
Canon	1	23330003	C	T	DOID:4159 / skin cancer/HERVH	GE	5842	MU60723486		intergenic_region
Canon	1	23330152	G	A	DOID:1793 / pancreatic cancer/HERVH	GE	5842	MU30019548		intergenic_region
Canon	1	23330373	G	A	DOID:4159 / skin cancer/HERVH	GE	5842	MU62343187		intergenic_region
Canon	1	23330490	C	T	DOID:4159 / skin cancer/HERVH	GE	5842	MU44809600		intergenic_region
Noncanon	1	25915088	G	A	DOID:4159 / skin cancer/HML2	AB	5843	MU54506880	RP11-70P17.1	intron_variant
Noncanon	1	25915336	C	T	DOID:4159 / skin cancer/HML2	AB	5843	MU44749045	RP11-70P17.1	intron_variant
Noncanon	1	25915352	C	T	DOID:1612 / breast cancer/HML2	AB	5843	MU65483746	RP11-70P17.1	intron_variant
Noncanon	1	25915509	C	T	DOID:1612 / breast cancer/HML2	AB	5843	MU65483748	RP11-70P17.1	intron_variant
Noncanon	1	25915574	C	T	DOID:4159 / skin cancer/HML2	AB	5843	MU55352931	RP11-70P17.1	intron_variant
Noncanon	1	25915643	A	C	DOID:10283 / prostate cancer/HML2	AB	5843	MU59803690	RP11-70P17.1	intron_variant
Noncanon	1	25916247	G	A	DOID:4159 / skin cancer/HML2	AB	5843	MU57560072	RP11-70P17.1	intron_variant
Noncanon	1	25916867	C	T	DOID:1324 / lung cancer/HML2	AB	5843	MU63274208		intergenic_region
Noncanon	1	25917091	C	T	DOID:263 / kidney cancer/HML2	AB	5843	MU4038700		intergenic_region
Noncanon	1	25918316	C	T	DOID:4159 / skin cancer/HML2	AB	5843	MU49095914		intergenic_region
Noncanon	1	25918463	C	T	DOID:4159 / skin cancer/HML2	AB	5843	MU42815029		intergenic_region
Noncanon	1	25919058	C	T	DOID:4159 / skin cancer/HML2	AB	5843	MU49741973		intergenic_region
Noncanon	1	25919412	G	A	DOID:4159 / skin cancer/HML2	AB	5843	MU43437605		intergenic_region
Noncanon	1	25919511	G	C	DOID:1793 / pancreatic cancer/HML2	AB	5843	MU69501797		intergenic_region
Noncanon	1	25920721	T	C	DOID:10283 / prostate cancer/HML2	AB	5843	MU28716468		intergenic_region
Noncanon	1	25921258	C	T	DOID:4159 / skin cancer/HML2	AB	5843	MU42363209		intergenic_region
Noncanon	1	25921548	C	T	DOID:4159 / skin cancer/HML2	AB	5843	MU53382474		intergenic_region
Noncanon	1	25921711	C	T	DOID:2394 / ovarian cancer/HML2	AB	5843	MU5254188		intergenic_region
Noncanon	1	25921805	T	C	DOID:3571 / liver cancer/HML2	AB	5843	MU5591910		intergenic_region
Noncanon	1	25921860	C	T	DOID:4159 / skin cancer/HML2	AB	5843	MU56583425		intergenic_region
Noncanon	1	25922005	T	A	DOID:5041 / esophageal cancer/HML2	AB	5843	MU17607946		intergenic_region
Noncanon	1	25922415	G	T	DOID:3571 / liver cancer/HML2	AB	5843	MU5591921		intergenic_region
Noncanon	1	25922551	C	T	DOID:4159 / skin cancer/HML2	AB	5843	MU63139455		intergenic_region
Noncanon	1	25922944	G	A	DOID:1793 / pancreatic cancer/HML2	AB	5843	MU28902791		intergenic_region
Noncanon	1	25924173	C	T	DOID:4159 / skin cancer/HML2	AB	5843	MU47718601		intergenic_region
Noncanon	1	25924805	G	C	DOID:1612 / breast cancer/HML2	AB	5843	MU66623207		intergenic_region
Noncanon	1	25924831	A	C	DOID:5041 / esophageal cancer/HML2	AB	5843	MU20127002		intergenic_region
Noncanon	1	25924968	T	A	DOID:2531 / hematologic cancer/HML2	AB	5843	MU68997306		intergenic_region
Noncanon	1	25924969	C	A	DOID:1612 / breast cancer/HML2	AB	5843	MU63634167		intergenic_region
Noncanon	1	25925256	C	T	DOID:1612 / breast cancer/HML2	AB	5843	MU63861961		intergenic_region
Noncanon	1	25925798	T	A	DOID:4159 / skin cancer/HML2	AB	5843	MU57757720		intergenic_region
Noncanon	1	25925921	C	T	DOID:1793 / pancreatic cancer/HML2	AB	5843	MU11418068		intergenic_region
Noncanon	1	25926336	G	A	DOID:4159 / skin cancer/HML2	AB	5843	MU43588087		intergenic_region
Noncanon	1	25926553	G	A	DOID:4159 / skin cancer/HML2	AB	5843	MU58335641		intergenic_region
Noncanon	1	25926856	C	T	DOID:4159 / skin cancer/HML2	AB	5843	MU50426214		intergenic_region
Noncanon	1	25926857	C	T	DOID:4159 / skin cancer/HML2	AB	5843	MU45517155		intergenic_region
Noncanon	1	25927227	G	C	DOID:1612 / breast cancer/HML2	AB	5843	MU67285526		intergenic_region
Noncanon	1	25927506	G	A	DOID:4159 / skin cancer/HML2	AB	5843	MU62107019		intergenic_region
Noncanon	1	25927593	T	C	DOID:263 / kidney cancer/HML2	AB	5843	MU4096530		intergenic_region
Noncanon	1	25927879	G	A	DOID:4159 / skin cancer/HML2	AB	5843	MU47052370		intergenic_region
Noncanon	1	25928025	C	T	DOID:2394 / ovarian cancer/HML2	AB	5843	MU5254222		intergenic_region
Noncanon	1	25928372	G	A	DOID:4159 / skin cancer/HML2	AB	5843	MU44805319		intergenic_region
Noncanon	1	25928456	A	G	DOID:2394 / ovarian cancer/HML2	AB	5843	MU5254237		intergenic_region
Noncanon	1	25929270	T	G	DOID:1612 / breast cancer/HML2	AB	5843	MU66623209		intergenic_region
Noncanon	1	25929847	C	T	DOID:4159 / skin cancer/HML2	AB	5843	MU45952065		intergenic_region
Noncanon	1	25929860	C	T	DOID:4159 / skin cancer/HML2	AB	5843	MU62798974		intergenic_region
Noncanon	1	25929897	C	T	DOID:1793 / pancreatic cancer/HML2	AB	5843	MU32437702		intergenic_region
Noncanon	1	25929944	G	A	DOID:4159 / skin cancer/HML2	AB	5843	MU48255875		intergenic_region
Noncanon	1	25930237	C	G	DOID:1612 / breast cancer/HML2	AB	5843	MU65942155		intergenic_region
Noncanon	1	25930254	C	A	DOID:1324 / lung cancer/HML2	AB	5843	MU56923876		intergenic_region
Noncanon	1	25930578	G	A	DOID:1612 / breast cancer/HML2	AB	5843	MU66069295		intergenic_region
Noncanon	1	25930632	G	A	DOID:1612 / breast cancer/HML2	AB	5843	MU63445313		intergenic_region
Noncanon	1	25930800	G	A	DOID:1793 / pancreatic cancer/HML2	AB	5843	MU5559404		intergenic_region
Noncanon	1	30268689	G	T	DOID:1612 / breast cancer/HERVL	S	5846	MU66705294		intergenic_region
Noncanon	1	30269554	G	A	DOID:4159 / skin cancer/HERVL	S	5846	MU48296889		intergenic_region
Noncanon	1	30269632	A	G	DOID:4159 / skin cancer/HERVL	S	5846	MU41286361		intergenic_region
Noncanon	1	30269784	G	A	DOID:4159 / skin cancer/HERVL	S	5846	MU55589845		intergenic_region
Noncanon	1	30269851	G	A	DOID:5041 / esophageal cancer/HERVL	S	5846	MU15420089		intergenic_region
Noncanon	1	30269911	T	G	DOID:4159 / skin cancer/HERVL	S	5846	MU40312373		intergenic_region
Noncanon	1	30269945	C	T	DOID:4159 / skin cancer/HERVL	S	5846	MU52614647		intergenic_region
Noncanon	1	30269971	G	A	DOID:4159 / skin cancer/HERVL	S	5846	MU51743733		intergenic_region
Noncanon	1	30270204	C	T	DOID:4159 / skin cancer/HERVL	S	5846	MU53949631		intergenic_region
Noncanon	1	30270248	G	A	DOID:4159 / skin cancer/HERVL	S	5846	MU36256186		intergenic_region
Noncanon	1	30270303	G	T	DOID:5041 / esophageal cancer/HERVL	S	5846	MU70994263		intergenic_region
Noncanon	1	30270570	G	A	DOID:1319 / brain cancer/HERVL	S	5846	MU67918809		intergenic_region
Noncanon	1	30270608	C	A	DOID:1612 / breast cancer/HERVL	S	5846	MU65340615		intergenic_region
Noncanon	1	30270622	G	C	DOID:5041 / esophageal cancer/HERVL	S	5846	MU17639157		intergenic_region
Noncanon	1	30270673	C	T	DOID:4159 / skin cancer/HERVL	S	5846	MU62191450		intergenic_region
Noncanon	1	30270957	C	T	DOID:4159 / skin cancer/HERVL	S	5846	MU54092853		intergenic_region
Noncanon	1	30271054	C	T	DOID:4159 / skin cancer/HERVL	S	5846	MU51875370		intergenic_region
Noncanon	1	30271218	C	T	DOID:4159 / skin cancer/HERVL	S	5846	MU55024146		intergenic_region
Noncanon	1	30271477	G	A	DOID:4159 / skin cancer/HERVL	S	5846	MU39524529		intergenic_region
Noncanon	1	30272317	G	A	DOID:4159 / skin cancer/HERVL	S	5846	MU52856254		intergenic_region
Noncanon	1	30272322	A	C	DOID:5041 / esophageal cancer/HERVL	S	5846	MU28194701		intergenic_region
Noncanon	1	30272373	G	A	DOID:3571 / liver cancer/HERVL	S	5846	MU3511454		intergenic_region
Noncanon	1	30272471	G	A	DOID:4159 / skin cancer/HERVL	S	5846	MU58920568		intergenic_region
Noncanon	1	30272877	G	A	DOID:4159 / skin cancer/HERVL	S	5846	MU43214134		intergenic_region
Noncanon	1	30273022	C	A	DOID:1612 / breast cancer/HERVL	S	5846	MU65761573		intergenic_region
Noncanon	1	30273208	C	T	DOID:4159 / skin cancer/HERVL	S	5846	MU51848399		intergenic_region
Noncanon	1	30273243	T	G	DOID:2394 / ovarian cancer/HERVL	S	5846	MU5269484		intergenic_region
Noncanon	1	30274300	G	T	DOID:10283 / prostate cancer/HERVL	S	5846	MU29381523		intergenic_region
Noncanon	1	30274339	C	T	DOID:4159 / skin cancer/HERVL	S	5846	MU50165309		intergenic_region
Noncanon	1	30274504	G	A	DOID:4159 / skin cancer/HERVL	S	5846	MU50489349		intergenic_region
Canon	1	30676536	T	C	DOID:1612 / breast cancer/HERVH	GE	5847	MU66885902		intergenic_region
Canon	1	30676758	C	T	DOID:1793 / pancreatic cancer/HERVH	GE	5847	MU28603147		intergenic_region
Canon	1	30676804	C	T	DOID:1324 / lung cancer/HERVH	GE	5847	MU56930303		intergenic_region
Canon	1	30676819	C	T	DOID:1793 / pancreatic cancer/HERVH	GE	5847	MU5576993		intergenic_region
Canon	1	30677102	A	C	DOID:2394 / ovarian cancer/HERVH	GE	5847	MU5271333		intergenic_region
Canon	1	30677159	C	A	DOID:4159 / skin cancer/HERVH	GE	5847	MU52015936		intergenic_region
Canon	1	30677192	C	T	DOID:4159 / skin cancer/HERVH	GE	5847	MU61939658		intergenic_region
Canon	1	30677236	G	A	DOID:4159 / skin cancer/HERVH	GE	5847	MU44263532		intergenic_region
Canon	1	30677301	C	T	DOID:4159 / skin cancer/HERVH	GE	5847	MU50608523		intergenic_region
Canon	1	30677506	C	T	DOID:4159 / skin cancer/HERVH	GE	5847	MU51394910		intergenic_region
Canon	1	30677641	C	G	DOID:1324 / lung cancer/HERVH	GE	5847	MU56930318		intergenic_region
Canon	1	30678316	G	A	DOID:4159 / skin cancer/HERVH	GE	5847	MU54126836		intergenic_region
Canon	1	30678549	C	T	DOID:4159 / skin cancer/HERVH	GE	5847	MU51901417		intergenic_region
Canon	1	30678696	C	T	DOID:10283 / prostate cancer/HERVH	GE	5847	MU30178209		intergenic_region
Canon	1	30678743	C	T	DOID:4159 / skin cancer/HERVH	GE	5847	MU44326478		intergenic_region
Canon	1	30678796	C	T	DOID:4159 / skin cancer/HERVH	GE	5847	MU58822246		intergenic_region
Canon	1	30678937	G	A	DOID:4159 / skin cancer/HERVH	GE	5847	MU54379710		intergenic_region
Canon	1	30678973	C	T	DOID:4159 / skin cancer/HERVH	GE	5847	MU54370623		intergenic_region
Canon	1	30679044	C	T	DOID:3571 / liver cancer/HERVH	GE	5847	MU2459403		intergenic_region
Canon	1	30679371	G	A	DOID:4159 / skin cancer/HERVH	GE	5847	MU47948311		intergenic_region
Canon	1	30679526	C	A	DOID:1793 / pancreatic cancer/HERVH	GE	5847	MU5577020		intergenic_region
Canon	1	30679839	T	G	DOID:5041 / esophageal cancer/HERVH	GE	5847	MU19078588		intergenic_region
Canon	1	30679936	T	C	DOID:3571 / liver cancer/HERVH	GE	5847	MU2939601		intergenic_region
Canon	1	30680002	C	T	DOID:3571 / liver cancer/HERVH	GE	5847	MU3121912		intergenic_region
Canon	1	30680655	C	T	DOID:4159 / skin cancer/HERVH	GE	5847	MU43886910		intergenic_region
Canon	1	31930814	C	T	DOID:4159 / skin cancer/HERVIP	GE	5848	MU43199745		intergenic_region
Canon	1	31930832	C	T	DOID:4159 / skin cancer/HERVIP	GE	5848	MU39222552		intergenic_region
Canon	1	31931074	C	T	DOID:4159 / skin cancer/HERVIP	GE	5848	MU46090110		intergenic_region
Canon	1	31931257	G	A	DOID:4159 / skin cancer/HERVIP	GE	5848	MU57153923		intergenic_region
Canon	1	31931272	T	A	DOID:4159 / skin cancer/HERVIP	GE	5848	MU58565410		intergenic_region
Canon	1	31931338	A	T	DOID:1612 / breast cancer/HERVIP	GE	5848	MU65002990		intergenic_region
Canon	1	31931482	G	A	DOID:4159 / skin cancer/HERVIP	GE	5848	MU39014611		intergenic_region
Canon	1	31931829	G	A	DOID:4159 / skin cancer/HERVIP	GE	5848	MU44361292		intergenic_region
Canon	1	31931863	G	A	DOID:4159 / skin cancer/HERVIP	GE	5848	MU55939775		intergenic_region
Canon	1	31932139	C	T	DOID:4159 / skin cancer/HERVIP	GE	5848	MU61223893		intergenic_region
Canon	1	31932153	C	T	DOID:4159 / skin cancer/HERVIP	GE	5848	MU54947713		intergenic_region
Canon	1	31932209	C	T	DOID:1793 / pancreatic cancer/HERVIP	GE	5848	MU30173809		intergenic_region
Canon	1	31932214	G	A	DOID:263 / kidney cancer/HERVIP	GE	5848	MU3930985		intergenic_region
Canon	1	31932558	T	C	DOID:4159 / skin cancer/HERVIP	GE	5848	MU45245390		intergenic_region
Canon	1	31932828	C	T	DOID:4159 / skin cancer/HERVIP	GE	5848	MU62290733		intergenic_region
Canon	1	31933188	G	A	DOID:4159 / skin cancer/HERVIP	GE	5848	MU61083874		intergenic_region
Canon	1	31933270	G	A	DOID:4159 / skin cancer/HERVIP	GE	5848	MU41345153		intergenic_region
Canon	1	31933639	G	A	DOID:4159 / skin cancer/HERVIP	GE	5848	MU39524684		intergenic_region
Canon	1	31933713	A	T	DOID:4159 / skin cancer/HERVIP	GE	5848	MU58902198		intergenic_region
Canon	1	31933756	G	A	DOID:4159 / skin cancer/HERVIP	GE	5848	MU58228393		intergenic_region
Canon	1	31933927	G	A	DOID:4159 / skin cancer/HERVIP	GE	5848	MU51366726		intergenic_region
Canon	1	31934063	C	T	DOID:4159 / skin cancer/HERVIP	GE	5848	MU56932868		intergenic_region
Canon	1	31934103	C	T	DOID:4159 / skin cancer/HERVIP	GE	5848	MU45369283		intergenic_region
Canon	1	31934122	G	A	DOID:4159 / skin cancer/HERVIP	GE	5848	MU52308590		intergenic_region
Canon	1	31934196	C	A	DOID:2394 / ovarian cancer/HERVIP	GE	5848	MU5276723		intergenic_region
Canon	1	31934320	C	T	DOID:5041 / esophageal cancer/HERVIP	GE	5848	MU71134059		intergenic_region
Canon	1	31934484	T	C	DOID:2394 / ovarian cancer/HERVIP	GE	5848	MU5276731		intergenic_region
Canon	1	31934524	C	T	DOID:4159 / skin cancer/HERVIP	GE	5848	MU51471174		intergenic_region
Canon	1	31934538	C	T	DOID:4159 / skin cancer/HERVIP	GE	5848	MU57509525		intergenic_region
Canon	1	31934587	C	T	DOID:4159 / skin cancer/HERVIP	GE	5848	MU43091524		intergenic_region
Canon	1	31934880	G	A	DOID:4159 / skin cancer/HERVIP	GE	5848	MU57948677		intergenic_region
Canon	1	31935240	G	A	DOID:4159 / skin cancer/HERVIP	GE	5848	MU49332322		intergenic_region
Canon	1	31935292	A	T	DOID:263 / kidney cancer/HERVIP	GE	5848	MU4243583		intergenic_region
Canon	1	31935371	G	A	DOID:4159 / skin cancer/HERVIP	GE	5848	MU39524685		intergenic_region
Canon	1	31935658	G	A	DOID:4159 / skin cancer/HERVIP	GE	5848	MU47196801		intergenic_region
Canon	1	31935731	G	A	DOID:4159 / skin cancer/HERVIP	GE	5848	MU50665221		intergenic_region
Canon	1	31935979	G	A	DOID:4159 / skin cancer/HERVIP	GE	5848	MU42276945		intergenic_region
Canon	1	31936013	G	A	DOID:4159 / skin cancer/HERVIP	GE	5848	MU34449028		intergenic_region
Canon	1	31936042	G	A	DOID:1793 / pancreatic cancer/HERVIP	GE	5848	MU64700249		intergenic_region
Canon	1	31936982	A	C	DOID:2394 / ovarian cancer/HERVIP	GE	5848	MU5276765		intergenic_region
Canon	1	31937026	C	T	DOID:4159 / skin cancer/HERVIP	GE	5848	MU57629092		intergenic_region
Canon	1	31937201	C	A	DOID:5041 / esophageal cancer/HERVIP	GE	5848	MU70551496		intergenic_region
Canon	1	31937282	C	T	DOID:4159 / skin cancer/HERVIP	GE	5848	MU56285066		intergenic_region
Canon	1	31937374	C	T	DOID:1793 / pancreatic cancer/HERVIP	GE	5848	MU64426909		intergenic_region
Canon	1	31937380	G	C	DOID:1612 / breast cancer/HERVIP	GE	5848	MU66660319		intergenic_region
Canon	1	31937392	G	A	DOID:5041 / esophageal cancer/HERVIP	GE	5848	MU19912336		intergenic_region
Canon	1	31937510	C	T	DOID:4159 / skin cancer/HERVIP	GE	5848	MU45140629		intergenic_region
Canon	1	31937595	C	T	DOID:4159 / skin cancer/HERVIP	GE	5848	MU39222553		intergenic_region
Canon	1	31937719	C	T	DOID:5041 / esophageal cancer/HERVIP	GE	5848	MU13994969		intergenic_region
Canon	1	31938105	G	A	DOID:4159 / skin cancer/HERVIP	GE	5848	MU55490512		intergenic_region
Canon	1	31938108	T	C	DOID:263 / kidney cancer/HERVIP	GE	5848	MU3929386		intergenic_region
Canon	1	31938140	T	C	DOID:1793 / pancreatic cancer/HERVIP	GE	5848	MU30684613		intergenic_region
Canon	1	31938274	C	T	DOID:4159 / skin cancer/HERVIP	GE	5848	MU42493314		intergenic_region
Canon	1	31938287	A	C	DOID:5041 / esophageal cancer/HERVIP	GE	5848	MU19912389		intergenic_region
Canon	1	31938457	C	T	DOID:4159 / skin cancer/HERVIP	GE	5848	MU60830335		intergenic_region
Canon	1	31938511	C	T	DOID:4159 / skin cancer/HERVIP	GE	5848	MU52610022		intergenic_region
Canon	1	31938867	T	A	DOID:4159 / skin cancer/HERVIP	GE	5848	MU46559663		intergenic_region
Canon	1	31939056	G	A	DOID:4159 / skin cancer/HERVIP	GE	5848	MU52849783		intergenic_region
Canon	1	31939503	G	A	DOID:4159 / skin cancer/HERVIP	GE	5848	MU52975408		intergenic_region
Canon	1	31939691	G	A	DOID:4159 / skin cancer/HERVIP	GE	5848	MU54375472		intergenic_region
Canon	1	31939855	T	C	DOID:1793 / pancreatic cancer/HERVIP	GE	5848	MU5582281		intergenic_region
Canon	1	31939857	T	C	DOID:1612 / breast cancer/HERVIP	GE	5848	MU67062243		intergenic_region
Canon	1	31940106	A	G	DOID:3571 / liver cancer/HERVIP	GE	5848	MU28523393		intergenic_region
Canon	1	31940138	G	A	DOID:1793 / pancreatic cancer/HERVIP	GE	5848	COSN7217046	.	.
Noncanon	1	32898197	C	T	DOID:4159 / skin cancer/HERVH	GE	5850	MU41531169		intergenic_region
Noncanon	1	32898261	G	A	DOID:4159 / skin cancer/HERVH	GE	5850	MU50620900		intergenic_region
Noncanon	1	32898987	C	T	DOID:4159 / skin cancer/HERVH	GE	5850	MU41842273		intergenic_region
Noncanon	1	32899069	C	T	DOID:1612 / breast cancer/HERVH	GE	5850	MU64956638		intergenic_region
Noncanon	1	32899105	C	T	DOID:4159 / skin cancer/HERVH	GE	5850	MU62102338		intergenic_region
Noncanon	1	32899669	C	T	DOID:4159 / skin cancer/HERVH	GE	5850	MU60078272		intergenic_region
Noncanon	1	32899680	A	T	DOID:1793 / pancreatic cancer/HERVH	GE	5850	MU14488444		intergenic_region
Noncanon	1	32900388	T	C	DOID:3571 / liver cancer/HERVH	GE	5850	MU5612123		intergenic_region
Noncanon	1	32900561	T	C	DOID:219 / colon cancer/HERVH	GE	5850	MU41818756		intergenic_region
Noncanon	1	32900578	C	T	DOID:219 / colon cancer/HERVH	GE	5850	MU41818804		intergenic_region
Noncanon	1	32900636	C	T	DOID:1793 / pancreatic cancer/HERVH	GE	5850	MU40459481		intergenic_region
Noncanon	1	32900673	G	A	DOID:219 / colon cancer/HERVH	GE	5850	MU40603372		intergenic_region
Noncanon	1	32900857	C	T	DOID:4159 / skin cancer/HERVH	GE	5850	MU60795022		intergenic_region
Noncanon	1	32901028	C	T	DOID:4159 / skin cancer/HERVH	GE	5850	MU55720148		intergenic_region
Noncanon	1	32901114	C	T	DOID:4159 / skin cancer/HERVH	GE	5850	MU55625618		intergenic_region
Noncanon	1	32901275	G	A	DOID:4159 / skin cancer/HERVH	GE	5850	MU57834658		intergenic_region
Noncanon	1	32901373	C	A	DOID:263 / kidney cancer/HERVH	GE	5850	MU14615295		intergenic_region
Noncanon	1	32901406	C	T	DOID:4159 / skin cancer/HERVH	GE	5850	MU56877986		intergenic_region
Noncanon	1	32902645	A	G	DOID:4159 / skin cancer/HERVH	GE	5850	MU43528559		intergenic_region
Noncanon	1	32902811	C	T	DOID:1612 / breast cancer/HERVH	GE	5850	MU65139530		intergenic_region
Noncanon	1	32903119	C	G	DOID:1793 / pancreatic cancer/HERVH	GE	5850	MU5585588		intergenic_region
Noncanon	1	32903329	A	C	DOID:1793 / pancreatic cancer/HERVH	GE	5850	MU30142650		intergenic_region
Noncanon	1	32903352	T	G	DOID:1612 / breast cancer/HERVH	GE	5850	MU64654322		intergenic_region
Noncanon	1	32903386	C	T	DOID:4159 / skin cancer/HERVH	GE	5850	MU43770951		intergenic_region
Noncanon	1	32903486	C	T	DOID:4159 / skin cancer/HERVH	GE	5850	MU39493278		intergenic_region
Noncanon	1	32903677	G	A	DOID:4159 / skin cancer/HERVH	GE	5850	MU41801738		intergenic_region
Noncanon	1	32903758	C	T	DOID:4159 / skin cancer/HERVH	GE	5850	MU45576720		intergenic_region
Noncanon	1	32903983	C	T	DOID:4159 / skin cancer/HERVH	GE	5850	MU60645684		intergenic_region
Noncanon	1	32904238	C	T	DOID:4159 / skin cancer/HERVH	GE	5850	MU47715989		intergenic_region
Noncanon	1	32904284	G	A	DOID:1793 / pancreatic cancer/HERVH	GE	5850	MU69912828		intergenic_region
Noncanon	1	32904925	G	A	DOID:4159 / skin cancer/HERVH	GE	5850	MU48208433		intergenic_region
Noncanon	1	32905356	G	A	DOID:4159 / skin cancer/HERVH	GE	5850	MU61339095		intergenic_region
Noncanon	1	32905765	A	T	DOID:4159 / skin cancer/HERVH	GE	5850	MU48215417		intergenic_region
Noncanon	1	32905803	C	T	DOID:4159 / skin cancer/HERVH	GE	5850	MU58248471		intergenic_region
Noncanon	1	32905905	T	A	DOID:5041 / esophageal cancer/HERVH	GE	5850	MU70496426		intergenic_region
Noncanon	1	32905919	C	A	DOID:4159 / skin cancer/HERVH	GE	5850	MU58903199		intergenic_region
Noncanon	1	32906315	C	T	DOID:4159 / skin cancer/HERVH	GE	5850	MU53691978		intergenic_region
Noncanon	1	32906801	A	G	DOID:1612 / breast cancer/HERVH	GE	5850	MU63390437		intergenic_region
Noncanon	1	32906999	C	T	DOID:4159 / skin cancer/HERVH	GE	5850	MU50736837		intergenic_region
Noncanon	1	32907150	G	A	DOID:4159 / skin cancer/HERVH	GE	5850	MU61014920		intergenic_region
Noncanon	1	32907501	G	A	DOID:4159 / skin cancer/HERVH	GE	5850	MU52841541		intergenic_region
Noncanon	1	33529485	G	T	DOID:1612 / breast cancer/HML8	AB	5852	MU65812616	AK2	intron_variant
Noncanon	1	33529571	G	A	DOID:4159 / skin cancer/HML8	AB	5852	MU46628921	AK2	intron_variant
Noncanon	1	33529595	A	T	DOID:2394 / ovarian cancer/HML8	AB	5852	MU5282686	AK2	intron_variant
Noncanon	1	33529622	C	T	DOID:4159 / skin cancer/HML8	AB	5852	MU39222576	AK2	intron_variant
Noncanon	1	33529834	C	A	DOID:1793 / pancreatic cancer/HML8	AB	5852	MU11421734	AK2	intron_variant
Noncanon	1	33530005	C	T	DOID:4159 / skin cancer/HML8	AB	5852	MU59340728	AK2	intron_variant
Noncanon	1	33530098	C	T	DOID:4159 / skin cancer/HML8	AB	5852	MU55742437	AK2	intron_variant
Noncanon	1	33530227	C	T	DOID:1612 / breast cancer/HML8	AB	5852	MU64887159	AK2	intron_variant
Noncanon	1	33530369	G	A	DOID:4159 / skin cancer/HML8	AB	5852	MU55341128	AK2	intron_variant
Noncanon	1	33530622	G	A	DOID:4159 / skin cancer/HML8	AB	5852	MU48188376	AK2	intron_variant
Noncanon	1	33530926	G	A	DOID:4159 / skin cancer/HML8	AB	5852	MU37238955	AK2	intron_variant
Noncanon	1	33531012	C	T	DOID:4159 / skin cancer/HML8	AB	5852	MU61457831	AK2	intron_variant
Noncanon	1	33531257	C	T	DOID:4159 / skin cancer/HML8	AB	5852	MU60604787	AK2	intron_variant
Noncanon	1	33531280	G	A	DOID:4159 / skin cancer/HML8	AB	5852	MU45876698	AK2	intron_variant
Noncanon	1	33531707	G	A	DOID:1793 / pancreatic cancer/HML8	AB	5852	MU32261370	AK2	intron_variant
Noncanon	1	33531825	G	A	DOID:4159 / skin cancer/HML8	AB	5852	MU44880388	AK2	intron_variant
Noncanon	1	33532218	G	A	DOID:4159 / skin cancer/HML8	AB	5852	MU45193670	AK2	intron_variant
Noncanon	1	33532548	C	T	DOID:4159 / skin cancer/HML8	AB	5852	MU51240444	AK2	intron_variant
Noncanon	1	33532689	A	T	DOID:1793 / pancreatic cancer/HML8	AB	5852	MU64576079	AK2	intron_variant
Noncanon	1	33532787	C	T	DOID:4159 / skin cancer/HML8	AB	5852	MU43104686	AK2	intron_variant
Noncanon	1	33532897	G	A	DOID:4159 / skin cancer/HML8	AB	5852	MU58285465	AK2	intron_variant
Noncanon	1	33532961	G	T	DOID:1612 / breast cancer/HML8	AB	5852	MU64115581	AK2	intron_variant
Noncanon	1	33534423	C	T	DOID:4159 / skin cancer/HML8	AB	5852	MU62057190	AK2	intron_variant
Noncanon	1	33534486	C	T	DOID:4159 / skin cancer/HML8	AB	5852	MU62832640	AK2	intron_variant
Noncanon	1	33534832	G	A	DOID:4159 / skin cancer/HML8	AB	5852	MU60816887	AK2	intron_variant
Noncanon	1	33534940	C	A	DOID:4159 / skin cancer/HML8	AB	5852	MU58714944	AK2	intron_variant
Noncanon	1	33535000	G	A	DOID:4159 / skin cancer/HML8	AB	5852	MU56221978	AK2	intron_variant
Noncanon	1	33535005	C	T	DOID:4159 / skin cancer/HML8	AB	5852	MU61638550	AK2	intron_variant
Noncanon	1	33535139	G	A	DOID:1612 / breast cancer/HML8	AB	5852	MU64942147	AK2	intron_variant
Noncanon	1	33535158	C	T	DOID:4159 / skin cancer/HML8	AB	5852	MU51465470	AK2	intron_variant
Noncanon	1	33535873	G	T	DOID:1612 / breast cancer/HML8	AB	5852	MU64790866	AK2	intron_variant
Noncanon	1	33536499	G	A	DOID:8618 / oral cavity cancer/HML8	AB	5852	MU67305283	AK2	intron_variant
Noncanon	1	33536506	G	A	DOID:4159 / skin cancer/HML8	AB	5852	MU53331654	AK2	intron_variant
Noncanon	1	35096536	C	T	DOID:4159 / skin cancer/HERVH	GE	5855	MU37239801		intergenic_region
Noncanon	1	35096588	G	A	DOID:4159 / skin cancer/HERVH	GE	5855	MU40835745		intergenic_region
Noncanon	1	35096685	G	C	DOID:1612 / breast cancer/HERVH	GE	5855	MU66557325		intergenic_region
Noncanon	1	35096859	C	T	DOID:4159 / skin cancer/HERVH	GE	5855	MU39222679		intergenic_region
Noncanon	1	35097093	T	C	DOID:1612 / breast cancer/HERVH	GE	5855	MU65340690		intergenic_region
Noncanon	1	35097114	A	G	DOID:4159 / skin cancer/HERVH	GE	5855	MU41488123		intergenic_region
Noncanon	1	35097159	C	T	DOID:1793 / pancreatic cancer/HERVH	GE	5855	MU29424865		intergenic_region
Noncanon	1	35097615	C	T	DOID:4159 / skin cancer/HERVH	GE	5855	MU58243481		intergenic_region
Noncanon	1	35097620	T	C	DOID:4159 / skin cancer/HERVH	GE	5855	MU43818248		intergenic_region
Noncanon	1	35098019	T	A	DOID:5041 / esophageal cancer/HERVH	GE	5855	MU36680690		intergenic_region
Noncanon	1	35098031	G	A	DOID:2531 / hematologic cancer/HERVH	GE	5855	MU68871337		intergenic_region
Noncanon	1	35098063	G	A	DOID:4159 / skin cancer/HERVH	GE	5855	MU48155810		intergenic_region
Noncanon	1	35098068	G	T	DOID:1324 / lung cancer/HERVH	GE	5855	MU44122658		intergenic_region
Noncanon	1	35098080	G	A	DOID:4159 / skin cancer/HERVH	GE	5855	MU71380436		intergenic_region
Noncanon	1	35098353	G	A	DOID:4159 / skin cancer/HERVH	GE	5855	MU52201648		intergenic_region
Noncanon	1	35098583	T	C	DOID:4159 / skin cancer/HERVH	GE	5855	MU48110404		intergenic_region
Noncanon	1	35098810	G	A	DOID:4159 / skin cancer/HERVH	GE	5855	MU35614842		intergenic_region
Noncanon	1	35098818	A	T	DOID:4159 / skin cancer/HERVH	GE	5855	MU46925378		intergenic_region
Noncanon	1	35098877	C	T	DOID:5041 / esophageal cancer/HERVH	GE	5855	MU15925947		intergenic_region
Noncanon	1	35099118	G	A	DOID:4159 / skin cancer/HERVH	GE	5855	MU36260480		intergenic_region
Noncanon	1	35099135	C	T	DOID:4159 / skin cancer/HERVH	GE	5855	MU39015647		intergenic_region
Noncanon	1	35099209	G	A	DOID:4159 / skin cancer/HERVH	GE	5855	MU62286310		intergenic_region
Noncanon	1	35099346	G	A	DOID:4159 / skin cancer/HERVH	GE	5855	MU35532087		intergenic_region
Noncanon	1	35099536	G	A	DOID:4159 / skin cancer/HERVH	GE	5855	MU55539508		intergenic_region
Noncanon	1	35099574	G	A	DOID:4159 / skin cancer/HERVH	GE	5855	MU41177076		intergenic_region
Noncanon	1	35099740	G	A	DOID:10283 / prostate cancer/HERVH	GE	5855	MU56143468		intergenic_region
Noncanon	1	35099991	G	A	DOID:4159 / skin cancer/HERVH	GE	5855	MU53246946		intergenic_region
Noncanon	1	35100007	G	A	DOID:1324 / lung cancer/HERVH	GE	5855	MU49748385		intergenic_region
Noncanon	1	35100121	G	A	DOID:4159 / skin cancer/HERVH	GE	5855	MU59394779		intergenic_region
Noncanon	1	35100202	G	A	DOID:4159 / skin cancer/HERVH	GE	5855	MU59238802		intergenic_region
Noncanon	1	35100225	C	G	DOID:4159 / skin cancer/HERVH	GE	5855	MU53208152		intergenic_region
Noncanon	1	35100281	C	T	DOID:4159 / skin cancer/HERVH	GE	5855	MU32235121		intergenic_region
Noncanon	1	35100281	C	T	DOID:10283 / prostate cancer/HERVH	GE	5855	MU32235121		intergenic_region
Noncanon	1	35100296	G	A	DOID:4159 / skin cancer/HERVH	GE	5855	MU59721620		intergenic_region
Noncanon	1	35100369	G	A	DOID:4159 / skin cancer/HERVH	GE	5855	MU62887420		intergenic_region
Noncanon	1	35100465	G	A	DOID:4159 / skin cancer/HERVH	GE	5855	MU62350894		intergenic_region
Noncanon	1	35100794	C	T	DOID:4159 / skin cancer/HERVH	GE	5855	MU46973868		intergenic_region
Noncanon	1	35100939	C	T	DOID:3571 / liver cancer/HERVH	GE	5855	MU48138064		intergenic_region
Noncanon	1	35100978	C	T	DOID:1612 / breast cancer/HERVH	GE	5855	MU66660459		intergenic_region
Noncanon	1	35100986	C	T	DOID:4159 / skin cancer/HERVH	GE	5855	MU48869998		intergenic_region
Noncanon	1	35101153	T	C	DOID:1612 / breast cancer/HERVH	GE	5855	MU66213098		intergenic_region
Noncanon	1	35101214	C	T	DOID:4159 / skin cancer/HERVH	GE	5855	MU44727593		intergenic_region
Noncanon	1	35101521	C	T	DOID:4159 / skin cancer/HERVH	GE	5855	MU48202464		intergenic_region
Noncanon	1	35101564	G	A	DOID:4159 / skin cancer/HERVH	GE	5855	MU55806868		intergenic_region
Noncanon	1	35101778	C	T	DOID:4159 / skin cancer/HERVH	GE	5855	MU55755501		intergenic_region
Noncanon	1	35102158	G	A	DOID:4159 / skin cancer/HERVH	GE	5855	MU61731052		intergenic_region
Noncanon	1	35102163	G	A	DOID:4159 / skin cancer/HERVH	GE	5855	MU49038491		intergenic_region
Noncanon	1	35102196	C	A	DOID:263 / kidney cancer/HERVH	GE	5855	MU22315895		intergenic_region
Noncanon	1	35102198	G	C	DOID:2394 / ovarian cancer/HERVH	GE	5855	MU5289324		intergenic_region
Noncanon	1	35102245	C	T	DOID:4159 / skin cancer/HERVH	GE	5855	MU44692782		intergenic_region
Noncanon	1	35102281	G	A	DOID:4159 / skin cancer/HERVH	GE	5855	MU50411070		intergenic_region
Noncanon	1	35598574	G	A	DOID:4159 / skin cancer/HERVH	GE	5856	MU42468847		intergenic_region
Noncanon	1	35598736	G	A	DOID:4159 / skin cancer/HERVH	GE	5856	MU58759906		intergenic_region
Noncanon	1	35598775	C	T	DOID:4159 / skin cancer/HERVH	GE	5856	MU40220735		intergenic_region
Noncanon	1	35598901	G	A	DOID:4159 / skin cancer/HERVH	GE	5856	MU43225879		intergenic_region
Noncanon	1	35598923	G	A	DOID:4159 / skin cancer/HERVH	GE	5856	MU48098987		intergenic_region
Noncanon	1	35599020	G	A	DOID:4159 / skin cancer/HERVH	GE	5856	MU59843942		intergenic_region
Noncanon	1	35599268	G	A	DOID:4159 / skin cancer/HERVH	GE	5856	MU47357076		intergenic_region
Noncanon	1	35599496	G	A	DOID:4159 / skin cancer/HERVH	GE	5856	MU48731481		intergenic_region
Noncanon	1	35600904	A	G	DOID:1793 / pancreatic cancer/HERVH	GE	5856	MU11423044		intergenic_region
Noncanon	1	35600911	G	A	DOID:4159 / skin cancer/HERVH	GE	5856	MU54792548		intergenic_region
Noncanon	1	35601100	G	A	DOID:4159 / skin cancer/HERVH	GE	5856	MU38794109		intergenic_region
Noncanon	1	35601621	G	T	DOID:10283 / prostate cancer/HERVH	GE	5856	MU55369436		intergenic_region
Noncanon	1	35601932	G	A	DOID:4159 / skin cancer/HERVH	GE	5856	MU61523450		intergenic_region
Noncanon	1	35602337	G	A	DOID:1612 / breast cancer/HERVH	GE	5856	MU65044385		intergenic_region
Noncanon	1	35602349	T	C	DOID:1612 / breast cancer/HERVH	GE	5856	MU67248972		intergenic_region
Noncanon	1	35602369	G	A	DOID:4159 / skin cancer/HERVH	GE	5856	MU51199598		intergenic_region
Noncanon	1	35602386	G	A	DOID:4159 / skin cancer/HERVH	GE	5856	MU56728571		intergenic_region
Noncanon	1	35602476	G	A	DOID:1793 / pancreatic cancer/HERVH	GE	5856	MU11423049		intergenic_region
Noncanon	1	35602517	G	A	DOID:4159 / skin cancer/HERVH	GE	5856	MU48546662		intergenic_region
Noncanon	1	35602523	G	A	DOID:4159 / skin cancer/HERVH	GE	5856	MU48229156		intergenic_region
Noncanon	1	35602600	G	A	DOID:4159 / skin cancer/HERVH	GE	5856	MU45472918		intergenic_region
Noncanon	1	35602733	C	T	DOID:4159 / skin cancer/HERVH	GE	5856	MU53770680		intergenic_region
Noncanon	1	35603192	G	A	DOID:4159 / skin cancer/HERVH	GE	5856	MU49028730		intergenic_region
Noncanon	1	35604331	G	A	DOID:3571 / liver cancer/HERVH	GE	5856	MU31012626		intergenic_region
Noncanon	1	35604453	G	A	DOID:4159 / skin cancer/HERVH	GE	5856	MU41373398		intergenic_region
Noncanon	1	35604801	C	T	DOID:4159 / skin cancer/HERVH	GE	5856	MU60587365		intergenic_region
Noncanon	1	35607025	T	A	DOID:5041 / esophageal cancer/HERV3	GE	5858	MU479943		intergenic_region
Noncanon	1	35607287	C	T	DOID:4159 / skin cancer/HERV3	GE	5858	MU35532249		intergenic_region
Noncanon	1	35607726	C	A	DOID:1612 / breast cancer/HERV3	GE	5858	MU63726637		intergenic_region
Noncanon	1	35607732	C	A	DOID:1324 / lung cancer/HERV3	GE	5858	MU63356504		intergenic_region
Noncanon	1	35608489	C	G	DOID:1793 / pancreatic cancer/HERV3	GE	5858	MU30306120		intergenic_region
Noncanon	1	35608655	G	A	DOID:4159 / skin cancer/HERV3	GE	5858	MU35615237		intergenic_region
Noncanon	1	35608744	A	G	DOID:4159 / skin cancer/HERV3	GE	5858	MU63097889		intergenic_region
Noncanon	1	35608831	G	A	DOID:4159 / skin cancer/HERV3	GE	5858	MU53306107		intergenic_region
Noncanon	1	35608861	T	C	DOID:3571 / liver cancer/HERV3	GE	5858	MU2978371		intergenic_region
Noncanon	1	35609128	C	T	DOID:2394 / ovarian cancer/HERV3	GE	5858	MU5291309		intergenic_region
Noncanon	1	35609239	G	A	DOID:1612 / breast cancer/HERV3	GE	5858	MU67062424		intergenic_region
Noncanon	1	35609600	C	T	DOID:2394 / ovarian cancer/HERV3	GE	5858	MU5291318		intergenic_region
Noncanon	1	35610362	T	C	DOID:1793 / pancreatic cancer/HERV3	GE	5858	MU11423061		intergenic_region
Noncanon	1	35610366	C	T	DOID:4159 / skin cancer/HERV3	GE	5858	MU43693103		intergenic_region
Noncanon	1	35610494	A	C	DOID:4159 / skin cancer/HERV3	GE	5858	MU53796501		intergenic_region
Noncanon	1	35610640	C	T	DOID:4159 / skin cancer/HERV3	GE	5858	MU61404886		intergenic_region
Noncanon	1	35610702	C	T	DOID:4159 / skin cancer/HERV3	GE	5858	MU45749076		intergenic_region
Noncanon	1	35611491	T	A	DOID:2531 / hematologic cancer/HERV3	GE	5858	COSN19296073	.	.
Noncanon	1	35611573	T	A	DOID:1612 / breast cancer/HERV3	GE	5858	MU67062426		intergenic_region
Canon	1	36795952	C	T	DOID:4159 / skin cancer/HERVFB	GE	5860	MU55759169		intergenic_region
Canon	1	36796176	G	A	DOID:4159 / skin cancer/HERVFB	GE	5860	MU34451010		intergenic_region
Canon	1	36796197	C	A	DOID:2531 / hematologic cancer/HERVFB	GE	5860	MU1534342		intergenic_region
Canon	1	36796541	C	T	DOID:4159 / skin cancer/HERVFB	GE	5860	MU51977903		intergenic_region
Canon	1	36797736	G	A	DOID:4159 / skin cancer/HERVFB	GE	5860	MU55963439		intergenic_region
Canon	1	36798480	C	T	DOID:4159 / skin cancer/HERVFB	GE	5860	MU53953271		intergenic_region
Canon	1	36799331	C	T	DOID:4159 / skin cancer/HERVFB	GE	5860	MU60209806		intergenic_region
Canon	1	36799699	C	T	DOID:4159 / skin cancer/HERVFB	GE	5860	MU41212284		intergenic_region
Canon	1	36799777	G	A	DOID:10283 / prostate cancer/HERVFB	GE	5860	MU4636026		intergenic_region
Canon	1	36800141	G	A	DOID:4159 / skin cancer/HERVFB	GE	5860	MU54331441		intergenic_region
Canon	1	36800189	C	T	DOID:4159 / skin cancer/HERVFB	GE	5860	MU41327214		intergenic_region
Canon	1	36800989	T	C	DOID:2531 / hematologic cancer/HERVFB	GE	5860	MU1371181		intergenic_region
Canon	1	36801260	C	A	DOID:4159 / skin cancer/HERVFB	GE	5860	MU56118398		intergenic_region
Canon	1	36802501	C	T	DOID:3571 / liver cancer/HERVFB	GE	5860	MU2279722		intergenic_region
Canon	1	36802636	G	A	DOID:1793 / pancreatic cancer/HERVFB	GE	5860	MU5602941		intergenic_region
Canon	1	36802850	C	T	DOID:4159 / skin cancer/HERVFB	GE	5860	MU55663497		intergenic_region
Canon	1	38374416	G	A	DOID:3571 / liver cancer/HERVH	GE	5861	MU5631078	INPP5B	intron_variant
Canon	1	38374644	C	T	DOID:1612 / breast cancer/HERVH	GE	5861	MU66660585	INPP5B	intron_variant
Canon	1	38374714	T	C	DOID:4159 / skin cancer/HERVH	GE	5861	MU56535376	INPP5B	intron_variant
Canon	1	38375960	T	C	DOID:3571 / liver cancer/HERVH	GE	5861	MU29437000	INPP5B	intron_variant
Canon	1	38376001	C	T	DOID:4159 / skin cancer/HERVH	GE	5861	MU55649640	INPP5B	intron_variant
Canon	1	38376310	T	C	DOID:1612 / breast cancer/HERVH	GE	5861	MU68455290	INPP5B	intron_variant
Canon	1	38376717	T	C	DOID:2394 / ovarian cancer/HERVH	GE	5861	MU5302706	INPP5B	intron_variant
Canon	1	38376720	G	A	DOID:4159 / skin cancer/HERVH	GE	5861	MU42456056	INPP5B	intron_variant
Canon	1	38377040	G	C	DOID:1612 / breast cancer/HERVH	GE	5861	MU67014247	INPP5B	intron_variant
Canon	1	38377193	G	A	DOID:4159 / skin cancer/HERVH	GE	5861	MU53318754	INPP5B	intron_variant
Canon	1	38377644	G	C	DOID:1612 / breast cancer/HERVH	GE	5861	MU65189120	INPP5B	intron_variant
Canon	1	38377977	G	C	DOID:3571 / liver cancer/HERVH	GE	5861	MU69781889	INPP5B	intron_variant
Canon	1	38378332	A	T	DOID:2394 / ovarian cancer/HERVH	GE	5861	MU5302726	INPP5B	intron_variant
Canon	1	38378373	G	A	DOID:4159 / skin cancer/HERVH	GE	5861	MU46890853	INPP5B	intron_variant
Canon	1	38378635	A	G	DOID:1612 / breast cancer/HERVH	GE	5861	MU63390719	INPP5B	intron_variant
Canon	1	38378860	C	G	DOID:4159 / skin cancer/HERVH	GE	5861	MU39525281	INPP5B	intron_variant
Canon	1	38379572	T	A	DOID:4159 / skin cancer/HERVH	GE	5861	MU51738291	INPP5B	intron_variant
Canon	1	38610468	T	A	DOID:2394 / ovarian cancer/HERVL	S	5862	MU5303579		intergenic_region
Canon	1	38610470	A	T	DOID:3571 / liver cancer/HERVL	S	5862	MU3538383		intergenic_region
Canon	1	38610715	T	G	DOID:2531 / hematologic cancer/HERVL	S	5862	MU69771286		intergenic_region
Canon	1	38610920	C	T	DOID:1319 / brain cancer/HERVL	S	5862	MU68614029		intergenic_region
Canon	1	38610967	G	A	DOID:4159 / skin cancer/HERVL	S	5862	MU43784337		intergenic_region
Canon	1	38611074	G	A	DOID:1793 / pancreatic cancer/HERVL	S	5862	MU29577107		intergenic_region
Canon	1	38611120	G	A	DOID:4159 / skin cancer/HERVL	S	5862	MU49197879		intergenic_region
Canon	1	38611146	T	C	DOID:10283 / prostate cancer/HERVL	S	5862	COSN19381213	.	.
Canon	1	38611226	G	A	DOID:1612 / breast cancer/HERVL	S	5862	MU63637299		intergenic_region
Canon	1	38611391	G	A	DOID:4159 / skin cancer/HERVL	S	5862	MU56563685		intergenic_region
Canon	1	38612115	T	A	DOID:2394 / ovarian cancer/HERVL	S	5862	MU5303600		intergenic_region
Canon	1	38612167	C	T	DOID:4159 / skin cancer/HERVL	S	5862	MU57390788		intergenic_region
Canon	1	38612382	C	T	DOID:4159 / skin cancer/HERVL	S	5862	MU48734393		intergenic_region
Canon	1	38612392	G	A	DOID:4159 / skin cancer/HERVL	S	5862	MU58078392		intergenic_region
Canon	1	38612426	C	G	DOID:1793 / pancreatic cancer/HERVL	S	5862	MU30042016		intergenic_region
Canon	1	38612539	C	A	DOID:263 / kidney cancer/HERVL	S	5862	MU3902770		intergenic_region
Canon	1	38612879	C	T	DOID:4159 / skin cancer/HERVL	S	5862	MU41274934		intergenic_region
Canon	1	38613336	C	T	DOID:4159 / skin cancer/HERVL	S	5862	MU40638372		intergenic_region
Canon	1	38613361	C	T	DOID:1612 / breast cancer/HERVL	S	5862	MU64895305		intergenic_region
Canon	1	38613831	C	T	DOID:2394 / ovarian cancer/HERVL	S	5862	MU5303619		intergenic_region
Canon	1	38613877	G	T	DOID:4159 / skin cancer/HERVL	S	5862	MU60653497		intergenic_region
Canon	1	38613887	C	T	DOID:1793 / pancreatic cancer/HERVL	S	5862	MU40550190		intergenic_region
Canon	1	38613908	C	A	DOID:1793 / pancreatic cancer/HERVL	S	5862	MU5612339		intergenic_region
Canon	1	38614002	C	T	DOID:4159 / skin cancer/HERVL	S	5862	MU45715283		intergenic_region
Canon	1	38614059	C	T	DOID:4159 / skin cancer/HERVL	S	5862	MU60921226		intergenic_region
Canon	1	38614077	T	A	DOID:2394 / ovarian cancer/HERVL	S	5862	MU5303634		intergenic_region
Canon	1	38614280	C	T	DOID:4159 / skin cancer/HERVL	S	5862	MU54293503		intergenic_region
Canon	1	38614410	G	A	DOID:4159 / skin cancer/HERVL	S	5862	MU41047471		intergenic_region
Canon	1	38614531	G	A	DOID:4159 / skin cancer/HERVL	S	5862	MU46158432		intergenic_region
Canon	1	38615189	C	G	DOID:2531 / hematologic cancer/HERVL	S	5862	MU69554653		intergenic_region
Canon	1	38615210	G	T	DOID:3571 / liver cancer/HERVL	S	5862	MU3269254		intergenic_region
Canon	1	38615254	G	A	DOID:4159 / skin cancer/HERVL	S	5862	MU49917633		intergenic_region
Canon	1	38615548	C	T	DOID:4159 / skin cancer/HERVL	S	5862	MU40881023		intergenic_region
Canon	1	38615642	C	G	DOID:1612 / breast cancer/HERVL	S	5862	MU65334686		intergenic_region
Canon	1	38615655	C	A	DOID:4159 / skin cancer/HERVL	S	5862	MU62315012		intergenic_region
Canon	1	38615941	C	T	DOID:4159 / skin cancer/HERVL	S	5862	MU53156228		intergenic_region
Canon	1	38616017	G	C	DOID:2394 / ovarian cancer/HERVL	S	5862	MU5303666		intergenic_region
Canon	1	38616092	T	G	DOID:5041 / esophageal cancer/HERVL	S	5862	MU19088798		intergenic_region
Canon	1	38891219	C	T	DOID:4159 / skin cancer/HERVH	GE	5863	MU44304513		intergenic_region
Canon	1	38891220	G	A	DOID:1793 / pancreatic cancer/HERVH	GE	5863	MU5613798		intergenic_region
Canon	1	38891255	C	T	DOID:4159 / skin cancer/HERVH	GE	5863	MU45807955		intergenic_region
Canon	1	38891769	C	T	DOID:3571 / liver cancer/HERVH	GE	5863	MU2272146		intergenic_region
Canon	1	38891789	G	A	DOID:4159 / skin cancer/HERVH	GE	5863	MU48378678		intergenic_region
Canon	1	38891880	C	T	DOID:4159 / skin cancer/HERVH	GE	5863	MU56314896		intergenic_region
Canon	1	38891891	G	T	DOID:5041 / esophageal cancer/HERVH	GE	5863	MU32862748		intergenic_region
Canon	1	38891984	C	T	DOID:4159 / skin cancer/HERVH	GE	5863	MU57614690		intergenic_region
Canon	1	38892001	C	T	DOID:4159 / skin cancer/HERVH	GE	5863	MU41306343		intergenic_region
Canon	1	38892182	C	G	DOID:8618 / oral cavity cancer/HERVH	GE	5863	MU67785953		intergenic_region
Canon	1	38892473	T	C	DOID:1612 / breast cancer/HERVH	GE	5863	MU63493169		intergenic_region
Canon	1	38892556	C	T	DOID:4159 / skin cancer/HERVH	GE	5863	MU36262949		intergenic_region
Canon	1	38892911	C	T	DOID:4159 / skin cancer/HERVH	GE	5863	MU53312345		intergenic_region
Canon	1	38893136	C	T	DOID:4159 / skin cancer/HERVH	GE	5863	MU55650226		intergenic_region
Canon	1	38893254	C	T	DOID:4159 / skin cancer/HERVH	GE	5863	MU60999025		intergenic_region
Canon	1	38893364	C	T	DOID:4159 / skin cancer/HERVH	GE	5863	MU50699135		intergenic_region
Canon	1	38893481	C	T	DOID:3571 / liver cancer/HERVH	GE	5863	MU49599090		intergenic_region
Canon	1	38893503	A	G	DOID:4159 / skin cancer/HERVH	GE	5863	MU56155587		intergenic_region
Canon	1	38893550	G	A	DOID:4159 / skin cancer/HERVH	GE	5863	MU41618632		intergenic_region
Canon	1	38893708	C	T	DOID:4159 / skin cancer/HERVH	GE	5863	MU57708771		intergenic_region
Canon	1	38893934	C	T	DOID:1793 / pancreatic cancer/HERVH	GE	5863	MU5613827		intergenic_region
Canon	1	38894110	G	A	DOID:4159 / skin cancer/HERVH	GE	5863	MU46299611		intergenic_region
Canon	1	38894645	T	A	DOID:3571 / liver cancer/HERVH	GE	5863	MU5632812		intergenic_region
Canon	1	38894914	C	T	DOID:4159 / skin cancer/HERVH	GE	5863	MU36262960		intergenic_region
Canon	1	38895009	T	G	DOID:1793 / pancreatic cancer/HERVH	GE	5863	MU69762033		intergenic_region
Canon	1	38895311	G	A	DOID:4159 / skin cancer/HERVH	GE	5863	MU52163542		intergenic_region
Canon	1	38895337	C	T	DOID:4159 / skin cancer/HERVH	GE	5863	MU62768113		intergenic_region
Canon	1	38895513	C	T	DOID:4159 / skin cancer/HERVH	GE	5863	MU57501166		intergenic_region
Canon	1	38895809	C	T	DOID:1612 / breast cancer/HERVH	GE	5863	MU65456189		intergenic_region
Canon	1	38895906	A	G	DOID:1324 / lung cancer/HERVH	GE	5863	MU40940925		intergenic_region
Canon	1	38896435	C	T	DOID:4159 / skin cancer/HERVH	GE	5863	MU62081006		intergenic_region
Noncanon	1	42410518	G	A	DOID:4159 / skin cancer/HERVW	GE	5867	MU54259928	HIVEP3	intron_variant
Noncanon	1	42411954	T	G	DOID:1612 / breast cancer/HERVW	GE	5867	MU64154344	HIVEP3	intron_variant
Noncanon	1	42412619	G	A	DOID:4159 / skin cancer/HERVW	GE	5867	MU49139253	HIVEP3	intron_variant
Noncanon	1	42412682	G	C	DOID:1324 / lung cancer/HERVW	GE	5867	MU56952476	HIVEP3	intron_variant
Noncanon	1	42413720	A	G	DOID:1612 / breast cancer/HERVW	GE	5867	MU2099458	HIVEP3	intron_variant
Noncanon	1	42413821	T	A	DOID:3571 / liver cancer/HERVW	GE	5867	COSN15732116	.	.
Noncanon	1	42413897	T	C	DOID:3571 / liver cancer/HERVW	GE	5867	MU29200099	HIVEP3	intron_variant
Noncanon	1	42414186	G	A	DOID:4159 / skin cancer/HERVW	GE	5867	MU53600509	HIVEP3	intron_variant
Noncanon	1	42414753	C	T	DOID:4159 / skin cancer/HERVW	GE	5867	MU47979931	HIVEP3	intron_variant
Noncanon	1	42414910	C	T	DOID:1324 / lung cancer/HERVW	GE	5867	MU11139799	HIVEP3	intron_variant
Noncanon	1	42414933	C	A	DOID:1612 / breast cancer/HERVW	GE	5867	COSN21314398	.	.
Noncanon	1	42415481	C	T	DOID:4159 / skin cancer/HERVW	GE	5867	MU61933828	HIVEP3	intron_variant
Noncanon	1	42415829	A	T	DOID:4159 / skin cancer/HERVW	GE	5867	MU52614236	HIVEP3	intron_variant
Noncanon	1	42416162	C	T	DOID:1612 / breast cancer/HERVW	GE	5867	MU64626723	HIVEP3	intron_variant
Noncanon	1	42416262	C	T	DOID:4159 / skin cancer/HERVW	GE	5867	MU60531249	HIVEP3	intron_variant
Noncanon	1	42416637	G	A	DOID:1612 / breast cancer/HERVW	GE	5867	MU65484821	HIVEP3	intron_variant
Noncanon	1	42416754	A	G	DOID:5041 / esophageal cancer/HERVW	GE	5867	MU70927214	HIVEP3	intron_variant
Noncanon	1	42416991	T	G	DOID:2531 / hematologic cancer/HERVW	GE	5867	MU68478857	HIVEP3	intron_variant
Noncanon	1	42417696	G	T	DOID:1793 / pancreatic cancer/HERVW	GE	5867	MU29434943	HIVEP3	intron_variant
Noncanon	1	42417746	C	A	DOID:1324 / lung cancer/HERVW	GE	5867	MU56952481	HIVEP3	intron_variant
Noncanon	1	42418404	T	C	DOID:2531 / hematologic cancer/HERVW	GE	5867	MU48541502	HIVEP3	intron_variant
Noncanon	1	42418421	G	A	DOID:4159 / skin cancer/HERVW	GE	5867	MU59562866	HIVEP3	intron_variant
Noncanon	1	42418946	T	C	DOID:2394 / ovarian cancer/HERVW	GE	5867	MU5319876	HIVEP3	intron_variant
Noncanon	1	42419391	T	C	DOID:4159 / skin cancer/HERVW	GE	5867	MU59262534	HIVEP3	intron_variant
Noncanon	1	42419409	G	A	DOID:4159 / skin cancer/HERVW	GE	5867	MU54168767	HIVEP3	intron_variant
Noncanon	1	43551429	C	T	DOID:4159 / skin cancer/HERVH	GE	5870	MU55495884		intergenic_region
Noncanon	1	43551507	T	A	DOID:1793 / pancreatic cancer/HERVH	GE	5870	MU64700368		intergenic_region
Noncanon	1	43551521	C	T	DOID:4159 / skin cancer/HERVH	GE	5870	MU47011461		intergenic_region
Noncanon	1	43551528	G	A	DOID:4159 / skin cancer/HERVH	GE	5870	MU62745954		intergenic_region
Noncanon	1	43552682	C	T	DOID:1793 / pancreatic cancer/HERVH	GE	5870	MU5634221		intergenic_region
Noncanon	1	43553213	T	C	DOID:4159 / skin cancer/HERVH	GE	5870	MU58468792		intergenic_region
Noncanon	1	43553905	T	C	DOID:2394 / ovarian cancer/HERVH	GE	5870	MU5324600		intergenic_region
Noncanon	1	43554107	C	G	DOID:4159 / skin cancer/HERVH	GE	5870	MU61028174		intergenic_region
Noncanon	1	43554309	C	T	DOID:4159 / skin cancer/HERVH	GE	5870	MU53769252		intergenic_region
Noncanon	1	43554404	C	T	DOID:4159 / skin cancer/HERVH	GE	5870	MU60207637		intergenic_region
Noncanon	1	43555256	C	T	DOID:4159 / skin cancer/HERVH	GE	5870	MU47876396		intergenic_region
Noncanon	1	43555363	C	G	DOID:1319 / brain cancer/HERVH	GE	5870	MU9232934		intergenic_region
Noncanon	1	43555535	T	A	DOID:263 / kidney cancer/HERVH	GE	5870	MU3956353		intergenic_region
Noncanon	1	43556047	A	T	DOID:3571 / liver cancer/HERVH	GE	5870	MU1036283		intergenic_region
Noncanon	1	43557361	G	A	DOID:4159 / skin cancer/HERVH	GE	5870	MU56991217		intergenic_region
Noncanon	1	43557599	G	A	DOID:4159 / skin cancer/HERVH	GE	5870	MU42151649		intergenic_region
Noncanon	1	43557873	G	A	DOID:4159 / skin cancer/HERVH	GE	5870	MU40885855		intergenic_region
Noncanon	1	43559110	T	C	DOID:1793 / pancreatic cancer/HERVH	GE	5870	MU5634230		intergenic_region
Noncanon	1	43559310	A	G	DOID:4159 / skin cancer/HERVH	GE	5870	MU60337855		intergenic_region
Noncanon	1	43559935	G	A	DOID:4159 / skin cancer/HERVH	GE	5870	MU47237352		intergenic_region
Noncanon	1	43559955	G	A	DOID:1793 / pancreatic cancer/HERVH	GE	5870	MU31922707		intergenic_region
Noncanon	1	43560015	C	T	DOID:4159 / skin cancer/HERVH	GE	5870	MU53481518		intergenic_region
Noncanon	1	43560028	G	C	DOID:3571 / liver cancer/HERVH	GE	5870	MU68358790		intergenic_region
Noncanon	1	43560126	G	A	DOID:4159 / skin cancer/HERVH	GE	5870	MU41798093		intergenic_region
Noncanon	1	43560322	G	A	DOID:4159 / skin cancer/HERVH	GE	5870	MU52318428		intergenic_region
Noncanon	1	43560718	A	G	DOID:5041 / esophageal cancer/HERVH	GE	5870	MU35390941		intergenic_region
Noncanon	1	43560855	G	T	DOID:4159 / skin cancer/HERVH	GE	5870	MU54281581		intergenic_region
Noncanon	1	43561478	A	C	DOID:3571 / liver cancer/HERVH	GE	5870	COSN6456935	.	.
Noncanon	1	43561626	C	T	DOID:4159 / skin cancer/HERVH	GE	5870	MU62904364		intergenic_region
Noncanon	1	43561659	C	T	DOID:4159 / skin cancer/HERVH	GE	5870	MU58686363		intergenic_region
Noncanon	1	43562119	G	A	DOID:4159 / skin cancer/HERVH	GE	5870	MU50090433		intergenic_region
Noncanon	1	43562328	A	G	DOID:4159 / skin cancer/HERVH	GE	5870	MU33292699		intergenic_region
Noncanon	1	44515945	G	A	DOID:3571 / liver cancer/PRIMA41	GE	5871	MU3041016	RP5-1198O20.4	intron_variant
Noncanon	1	44516179	C	T	DOID:3571 / liver cancer/PRIMA41	GE	5871	MU1112486	RP5-1198O20.4	intron_variant
Noncanon	1	44516884	A	G	DOID:1793 / pancreatic cancer/PRIMA41	GE	5871	MU32135442	RP5-1198O20.4	intron_variant
Noncanon	1	44517253	T	C	DOID:1793 / pancreatic cancer/PRIMA41	GE	5871	MU30852698	RP5-1198O20.4	intron_variant
Noncanon	1	44517301	C	T	DOID:4159 / skin cancer/PRIMA41	GE	5871	MU57701631	RP5-1198O20.4	intron_variant
Noncanon	1	44518262	C	T	DOID:4159 / skin cancer/PRIMA41	GE	5871	MU56005841	RP5-1198O20.4	intron_variant
Noncanon	1	44518491	T	C	DOID:1612 / breast cancer/PRIMA41	GE	5871	MU67249025	RP5-1198O20.4	intron_variant
Noncanon	1	44519118	G	T	DOID:4159 / skin cancer/PRIMA41	GE	5871	MU60409098	RP5-1198O20.4	intron_variant
Noncanon	1	44519443	T	C	DOID:4159 / skin cancer/PRIMA41	GE	5871	MU53760923	RP5-1198O20.4	intron_variant
Noncanon	1	44520298	G	A	DOID:10283 / prostate cancer/PRIMA41	GE	5871	MU4636439	RP5-1198O20.4	intron_variant
Noncanon	1	44520342	A	T	DOID:2394 / ovarian cancer/PRIMA41	GE	5871	MU5328529	RP5-1198O20.4	intron_variant
Noncanon	1	44520542	C	T	DOID:4159 / skin cancer/PRIMA41	GE	5871	MU57828351	RP5-1198O20.4	intron_variant
Noncanon	1	44520587	G	A	DOID:4159 / skin cancer/PRIMA41	GE	5871	MU45446023	RP5-1198O20.4	intron_variant
Noncanon	1	44521062	G	A	DOID:4159 / skin cancer/PRIMA41	GE	5871	MU48381350	RP5-1198O20.4	intron_variant
Noncanon	1	44521355	C	T	DOID:4159 / skin cancer/PRIMA41	GE	5871	MU52295538	RP5-1198O20.4	intron_variant
Noncanon	1	44521522	T	C	DOID:2531 / hematologic cancer/PRIMA41	GE	5871	MU69622581	RP5-1198O20.4	intron_variant
Noncanon	1	44522199	G	T	DOID:5041 / esophageal cancer/PRIMA41	GE	5871	MU68322539	RP5-1198O20.4	intron_variant
Noncanon	1	44522490	T	A	DOID:1324 / lung cancer/PRIMA41	GE	5871	MU63231821	RP5-1198O20.4	intron_variant
Noncanon	1	44522543	G	A	DOID:1793 / pancreatic cancer/PRIMA41	GE	5871	MU5637734	RP5-1198O20.4	intron_variant
Noncanon	1	44523076	C	T	DOID:4159 / skin cancer/PRIMA41	GE	5871	MU48296512	RP5-1198O20.4	intron_variant
Noncanon	1	44523116	A	T	DOID:3571 / liver cancer/PRIMA41	GE	5871	MU30993945	RP5-1198O20.4	intron_variant
Noncanon	1	44523255	C	T	DOID:4159 / skin cancer/PRIMA41	GE	5871	MU59857091	RP5-1198O20.4	intron_variant
Noncanon	1	44523657	C	A	DOID:3571 / liver cancer/PRIMA41	GE	5871	COSN6036380	.	.
Noncanon	1	44523774	C	T	DOID:4159 / skin cancer/PRIMA41	GE	5871	MU54583945	RP5-1198O20.4	intron_variant
Noncanon	1	44524251	G	A	DOID:1793 / pancreatic cancer/PRIMA41	GE	5871	MU5637781	RP5-1198O20.4	intron_variant
Noncanon	1	44524442	C	T	DOID:5041 / esophageal cancer/PRIMA41	GE	5871	MU69288818	RP5-1198O20.4	intron_variant
Noncanon	1	44525302	T	C	DOID:2394 / ovarian cancer/PRIMA41	GE	5871	MU5328560	RP5-1198O20.4	intron_variant
Noncanon	1	44525541	G	A	DOID:4159 / skin cancer/PRIMA41	GE	5871	MU45055399	RP5-1198O20.4	intron_variant
Noncanon	1	44525710	C	T	DOID:4159 / skin cancer/PRIMA41	GE	5871	MU40680493	RP5-1198O20.4	intron_variant
Noncanon	1	44526139	C	T	DOID:4159 / skin cancer/PRIMA41	GE	5871	MU46985415	RP5-1198O20.4	intron_variant
Noncanon	1	44526837	C	T	DOID:4159 / skin cancer/PRIMA41	GE	5871	MU53738428	RP5-1198O20.4	intron_variant
Noncanon	1	44527020	T	C	DOID:3571 / liver cancer/PRIMA41	GE	5871	MU3723557	RP5-1198O20.4	intron_variant
Noncanon	1	44527115	G	A	DOID:4159 / skin cancer/PRIMA41	GE	5871	MU51364561	RP5-1198O20.4	intron_variant
Noncanon	1	44527258	A	C	DOID:10283 / prostate cancer/PRIMA41	GE	5871	MU1734356	RP5-1198O20.4	intron_variant
Canon	1	45782391	T	C	DOID:1612 / breast cancer/HERVH	GE	5872	MU2014081		intergenic_region
Canon	1	45783162	A	G	DOID:4159 / skin cancer/HERVH	GE	5872	MU43372825		intergenic_region
Canon	1	45783219	C	T	DOID:4159 / skin cancer/HERVH	GE	5872	MU53166649		intergenic_region
Canon	1	45784520	C	T	DOID:4159 / skin cancer/HERVH	GE	5872	MU45383505		intergenic_region
Canon	1	45785048	A	T	DOID:5041 / esophageal cancer/HERVH	GE	5872	MU25249735		intergenic_region
Canon	1	45785379	T	A	DOID:2394 / ovarian cancer/HERVH	GE	5872	MU5333738		intergenic_region
Canon	1	45786057	C	T	DOID:4159 / skin cancer/HERVH	GE	5872	MU63088048		intergenic_region
Canon	1	45786709	G	A	DOID:4159 / skin cancer/HERVH	GE	5872	MU52645876		intergenic_region
Canon	1	46219491	C	T	DOID:4159 / skin cancer/HERVIP	GE	5874	MU62308295		intergenic_region
Canon	1	46219948	C	T	DOID:1793 / pancreatic cancer/HERVIP	GE	5874	MU5644752		intergenic_region
Canon	1	46219953	T	C	DOID:1612 / breast cancer/HERVIP	GE	5874	MU66532791		intergenic_region
Canon	1	46220070	C	A	DOID:1324 / lung cancer/HERVIP	GE	5874	MU63274271		intergenic_region
Canon	1	46220081	T	A	DOID:1793 / pancreatic cancer/HERVIP	GE	5874	MU32477883		intergenic_region
Canon	1	46220158	C	T	DOID:4159 / skin cancer/HERVIP	GE	5874	MU47744278		intergenic_region
Canon	1	46220462	C	T	DOID:4159 / skin cancer/HERVIP	GE	5874	MU36266568		intergenic_region
Canon	1	46220586	C	T	DOID:4159 / skin cancer/HERVIP	GE	5874	MU41182711		intergenic_region
Canon	1	46220925	C	T	DOID:4159 / skin cancer/HERVIP	GE	5874	MU57358668		intergenic_region
Canon	1	46221376	C	T	DOID:4159 / skin cancer/HERVIP	GE	5874	MU33319899		intergenic_region
Canon	1	46221674	G	A	DOID:4159 / skin cancer/HERVIP	GE	5874	MU51156333		intergenic_region
Canon	1	46221693	G	A	DOID:4159 / skin cancer/HERVIP	GE	5874	MU52646079		intergenic_region
Canon	1	46221916	G	A	DOID:4159 / skin cancer/HERVIP	GE	5874	MU61713095		intergenic_region
Canon	1	46222120	G	A	DOID:4159 / skin cancer/HERVIP	GE	5874	MU50320558		intergenic_region
Canon	1	46222193	G	T	DOID:2394 / ovarian cancer/HERVIP	GE	5874	MU5335365		intergenic_region
Canon	1	46222497	C	T	DOID:4159 / skin cancer/HERVIP	GE	5874	MU59271131		intergenic_region
Canon	1	46222568	G	T	DOID:1324 / lung cancer/HERVIP	GE	5874	MU43682782		intergenic_region
Canon	1	46222581	G	C	DOID:1612 / breast cancer/HERVIP	GE	5874	MU63637526		intergenic_region
Canon	1	46222896	C	T	DOID:4159 / skin cancer/HERVIP	GE	5874	MU39525804		intergenic_region
Canon	1	46223518	G	T	DOID:1612 / breast cancer/HERVIP	GE	5874	MU66660887		intergenic_region
Canon	1	46223749	C	T	DOID:4159 / skin cancer/HERVIP	GE	5874	MU44863077		intergenic_region
Canon	1	46223780	C	T	DOID:4159 / skin cancer/HERVIP	GE	5874	MU63013782		intergenic_region
Canon	1	46223923	C	T	DOID:4159 / skin cancer/HERVIP	GE	5874	MU42566861		intergenic_region
Canon	1	46223990	C	A	DOID:5041 / esophageal cancer/HERVIP	GE	5874	MU70654569		intergenic_region
Canon	1	46224132	G	A	DOID:4159 / skin cancer/HERVIP	GE	5874	MU48101650		intergenic_region
Canon	1	46224302	G	A	DOID:4159 / skin cancer/HERVIP	GE	5874	MU40220906		intergenic_region
Canon	1	46224435	C	A	DOID:5041 / esophageal cancer/HERVIP	GE	5874	MU367894		intergenic_region
Canon	1	46224477	A	T	DOID:1612 / breast cancer/HERVIP	GE	5874	MU66028988		intergenic_region
Canon	1	46224482	G	A	DOID:4159 / skin cancer/HERVIP	GE	5874	MU49240729		intergenic_region
Canon	1	46224671	T	G	DOID:4159 / skin cancer/HERVIP	GE	5874	MU38274327		intergenic_region
Canon	1	46225162	C	T	DOID:4159 / skin cancer/HERVIP	GE	5874	MU49415760		intergenic_region
Canon	1	46225808	G	A	DOID:1612 / breast cancer/HERVIP	GE	5874	MU66660891		intergenic_region
Canon	1	46226032	G	A	DOID:4159 / skin cancer/HERVIP	GE	5874	MU59334231		intergenic_region
Canon	1	46226114	C	T	DOID:4159 / skin cancer/HERVIP	GE	5874	MU50651719		intergenic_region
Canon	1	46226135	T	G	DOID:2394 / ovarian cancer/HERVIP	GE	5874	MU5335379		intergenic_region
Canon	1	46226179	A	G	DOID:10283 / prostate cancer/HERVIP	GE	5874	MU24455201		intergenic_region
Canon	1	46226284	G	A	DOID:4159 / skin cancer/HERVIP	GE	5874	MU52559190		intergenic_region
Canon	1	46226457	G	A	DOID:4159 / skin cancer/HERVIP	GE	5874	MU47557732		intergenic_region
Canon	1	46226586	G	A	DOID:3571 / liver cancer/HERVIP	GE	5874	MU32096668		intergenic_region
Canon	1	46226684	G	A	DOID:4159 / skin cancer/HERVIP	GE	5874	MU56155831		intergenic_region
Canon	1	46226972	G	A	DOID:1612 / breast cancer/HERVIP	GE	5874	MU63794504		intergenic_region
Canon	1	46227070	C	T	DOID:4159 / skin cancer/HERVIP	GE	5874	MU57758446		intergenic_region
Canon	1	46227423	C	A	DOID:3571 / liver cancer/HERVIP	GE	5874	MU1218073		intergenic_region
Canon	1	46227693	T	G	DOID:5041 / esophageal cancer/HERVIP	GE	5874	MU71176596		intergenic_region
Canon	1	46227820	G	A	DOID:4159 / skin cancer/HERVIP	GE	5874	MU35364522		intergenic_region
Noncanon	1	46791324	C	T	DOID:4159 / skin cancer/HERVE	GE	5875	MU51226996		intergenic_region
Noncanon	1	46791348	C	T	DOID:4159 / skin cancer/HERVE	GE	5875	MU51388034		intergenic_region
Noncanon	1	46791478	C	T	DOID:4159 / skin cancer/HERVE	GE	5875	MU39525824		intergenic_region
Noncanon	1	46792183	A	C	DOID:1324 / lung cancer/HERVE	GE	5875	MU63283943		intergenic_region
Noncanon	1	46792371	C	T	DOID:4159 / skin cancer/HERVE	GE	5875	MU55793114		intergenic_region
Noncanon	1	46792695	T	C	DOID:4159 / skin cancer/HERVE	GE	5875	MU71428057		intergenic_region
Noncanon	1	46793042	G	A	DOID:219 / colon cancer/HERVE	GE	5875	MU44923642		intergenic_region
Noncanon	1	46793180	C	T	DOID:4159 / skin cancer/HERVE	GE	5875	MU41486800		intergenic_region
Noncanon	1	46793583	C	T	DOID:4159 / skin cancer/HERVE	GE	5875	MU43737176		intergenic_region
Noncanon	1	46793629	C	T	DOID:5041 / esophageal cancer/HERVE	GE	5875	MU25474011		intergenic_region
Noncanon	1	46793938	C	T	DOID:4159 / skin cancer/HERVE	GE	5875	MU48549979		intergenic_region
Noncanon	1	46794251	C	T	DOID:5041 / esophageal cancer/HERVE	GE	5875	MU36241430		intergenic_region
Noncanon	1	46794646	C	T	DOID:4159 / skin cancer/HERVE	GE	5875	MU42119102		intergenic_region
Noncanon	1	46796647	G	A	DOID:4159 / skin cancer/HERVE	GE	5875	MU54632821		intergenic_region
Noncanon	1	46796662	G	A	DOID:4159 / skin cancer/HERVE	GE	5875	MU55320861		intergenic_region
Noncanon	1	46796829	C	T	DOID:1612 / breast cancer/HERVE	GE	5875	MU65376522		intergenic_region
Noncanon	1	46796866	C	G	DOID:2531 / hematologic cancer/HERVE	GE	5875	MU68478882		intergenic_region
Noncanon	1	46797353	G	C	DOID:3571 / liver cancer/HERVE	GE	5875	MU30554613		intergenic_region
Noncanon	1	46797706	C	T	DOID:5041 / esophageal cancer/HERVE	GE	5875	MU22948803		intergenic_region
Noncanon	1	46797957	T	A	DOID:2394 / ovarian cancer/HERVE	GE	5875	MU5337491		intergenic_region
Noncanon	1	46797957	T	A	DOID:2394 / ovarian cancer/HERVE	GE	5875	COSN15426655	.	.
Noncanon	1	46847067	C	T	DOID:3571 / liver cancer/HERVW	GE	5876	MU47365217		intergenic_region
Noncanon	1	46847525	C	T	DOID:1612 / breast cancer/HERVW	GE	5876	MU64772893		intergenic_region
Noncanon	1	46847719	C	T	DOID:4159 / skin cancer/HERVW	GE	5876	MU60595125		intergenic_region
Noncanon	1	46848499	C	T	DOID:4159 / skin cancer/HERVW	GE	5876	MU33320005		intergenic_region
Noncanon	1	46848704	T	C	DOID:1612 / breast cancer/HERVW	GE	5876	MU65536791		intergenic_region
Noncanon	1	46849218	C	T	DOID:1612 / breast cancer/HERVW	GE	5876	MU66308333		intergenic_region
Noncanon	1	46849836	T	C	DOID:5041 / esophageal cancer/HERVW	GE	5876	MU21343740		intergenic_region
Noncanon	1	46849931	C	T	DOID:4159 / skin cancer/HERVW	GE	5876	MU51839092		intergenic_region
Noncanon	1	46849973	C	T	DOID:4159 / skin cancer/HERVW	GE	5876	MU42321574		intergenic_region
Noncanon	1	46850486	C	T	DOID:4159 / skin cancer/HERVW	GE	5876	MU58662162		intergenic_region
Noncanon	1	46850640	T	C	DOID:3571 / liver cancer/HERVW	GE	5876	MU3604806		intergenic_region
Noncanon	1	46850755	C	T	DOID:4159 / skin cancer/HERVW	GE	5876	MU51695701		intergenic_region
Noncanon	1	46851123	A	G	DOID:3571 / liver cancer/HERVW	GE	5876	MU31645724		intergenic_region
Noncanon	1	46851276	C	T	DOID:4159 / skin cancer/HERVW	GE	5876	MU58152386		intergenic_region
Noncanon	1	46851662	G	A	DOID:1612 / breast cancer/HERVW	GE	5876	COSN5168551	.	.
Noncanon	1	46851823	C	T	DOID:4159 / skin cancer/HERVW	GE	5876	MU51974363		intergenic_region
Noncanon	1	46852029	G	A	DOID:4159 / skin cancer/HERVW	GE	5876	MU62757682		intergenic_region
Noncanon	1	46852170	A	G	DOID:3571 / liver cancer/HERVW	GE	5876	MU31411423		intergenic_region
Noncanon	1	46852271	C	T	DOID:4159 / skin cancer/HERVW	GE	5876	MU42130832		intergenic_region
Noncanon	1	46852450	C	T	DOID:4159 / skin cancer/HERVW	GE	5876	MU42559703		intergenic_region
Noncanon	1	46853022	C	T	DOID:4159 / skin cancer/HERVW	GE	5876	MU53977408		intergenic_region
Noncanon	1	46853241	A	C	DOID:5041 / esophageal cancer/HERVW	GE	5876	MU36241464		intergenic_region
Noncanon	1	46853319	C	A	DOID:1793 / pancreatic cancer/HERVW	GE	5876	MU29320923		intergenic_region
Noncanon	1	46853882	C	T	DOID:4159 / skin cancer/HERVW	GE	5876	MU42361429		intergenic_region
Noncanon	1	46853928	G	C	DOID:1793 / pancreatic cancer/HERVW	GE	5876	MU29320947		intergenic_region
Noncanon	1	46854235	G	A	DOID:10283 / prostate cancer/HERVW	GE	5876	MU15383315		intergenic_region
Noncanon	1	46854353	C	T	DOID:4159 / skin cancer/HERVW	GE	5876	MU62433024		intergenic_region
Noncanon	1	46854382	C	T	DOID:4159 / skin cancer/HERVW	GE	5876	MU39525832		intergenic_region
Noncanon	1	46854600	G	T	DOID:1324 / lung cancer/HERVW	GE	5876	MU56957842		intergenic_region
Noncanon	1	46855044	G	A	DOID:4159 / skin cancer/HERVW	GE	5876	MU54054351		intergenic_region
Noncanon	1	46855519	A	G	DOID:2531 / hematologic cancer/HERVW	GE	5876	MU69772135		intergenic_region
Noncanon	1	46856058	G	A	DOID:1793 / pancreatic cancer/HERVW	GE	5876	MU5647328		intergenic_region
Noncanon	1	46856212	G	A	DOID:3571 / liver cancer/HERVW	GE	5876	MU3103951		intergenic_region
Noncanon	1	46856503	G	A	DOID:4159 / skin cancer/HERVW	GE	5876	MU56784962		intergenic_region
Noncanon	1	46856529	G	A	DOID:4159 / skin cancer/HERVW	GE	5876	MU42746508		intergenic_region
Canon	1	47368378	C	T	DOID:4159 / skin cancer/HML8	AB	5878	MU61506271		intergenic_region
Canon	1	47368641	C	T	DOID:4159 / skin cancer/HML8	AB	5878	MU38080295		intergenic_region
Canon	1	47368707	C	T	DOID:4159 / skin cancer/HML8	AB	5878	MU43567591		intergenic_region
Canon	1	47368899	C	T	DOID:4159 / skin cancer/HML8	AB	5878	MU55468972		intergenic_region
Canon	1	47369071	G	A	DOID:1612 / breast cancer/HML8	AB	5878	MU66236127		intergenic_region
Canon	1	47369150	C	T	DOID:4159 / skin cancer/HML8	AB	5878	MU52696983		intergenic_region
Canon	1	47369476	G	A	DOID:4159 / skin cancer/HML8	AB	5878	MU56013720		intergenic_region
Canon	1	47369493	G	A	DOID:4159 / skin cancer/HML8	AB	5878	MU53649354		intergenic_region
Canon	1	47369506	G	A	DOID:4159 / skin cancer/HML8	AB	5878	MU62364222		intergenic_region
Canon	1	47369537	C	T	DOID:4159 / skin cancer/HML8	AB	5878	MU45142898		intergenic_region
Canon	1	47369839	G	A	DOID:4159 / skin cancer/HML8	AB	5878	MU54245691		intergenic_region
Canon	1	47369921	C	T	DOID:4159 / skin cancer/HML8	AB	5878	MU38794520		intergenic_region
Canon	1	47369952	C	T	DOID:4159 / skin cancer/HML8	AB	5878	MU43033638		intergenic_region
Canon	1	47370095	A	C	DOID:5041 / esophageal cancer/HML8	AB	5878	MU35108634		intergenic_region
Canon	1	47370272	A	T	DOID:4159 / skin cancer/HML8	AB	5878	MU62910770		intergenic_region
Canon	1	47370276	C	T	DOID:4159 / skin cancer/HML8	AB	5878	MU56614356		intergenic_region
Canon	1	47370323	G	T	DOID:4159 / skin cancer/HML8	AB	5878	MU57963119		intergenic_region
Canon	1	47370388	T	A	DOID:4159 / skin cancer/HML8	AB	5878	MU61807410		intergenic_region
Canon	1	47370400	C	T	DOID:4159 / skin cancer/HML8	AB	5878	MU59341817		intergenic_region
Canon	1	47370406	C	A	DOID:5041 / esophageal cancer/HML8	AB	5878	MU69288930		intergenic_region
Canon	1	47370414	C	T	DOID:4159 / skin cancer/HML8	AB	5878	MU71380570		intergenic_region
Canon	1	47370421	C	T	DOID:4159 / skin cancer/HML8	AB	5878	MU59081035		intergenic_region
Canon	1	47370509	C	T	DOID:4159 / skin cancer/HML8	AB	5878	MU58941506		intergenic_region
Canon	1	47370558	G	A	DOID:4159 / skin cancer/HML8	AB	5878	MU47529219		intergenic_region
Canon	1	47370744	C	T	DOID:4159 / skin cancer/HML8	AB	5878	MU60056036		intergenic_region
Canon	1	47370938	C	T	DOID:4159 / skin cancer/HML8	AB	5878	MU44491561		intergenic_region
Canon	1	47370968	G	A	DOID:4159 / skin cancer/HML8	AB	5878	MU59315347		intergenic_region
Canon	1	47371224	G	A	DOID:4159 / skin cancer/HML8	AB	5878	MU61169833		intergenic_region
Canon	1	47371277	C	T	DOID:4159 / skin cancer/HML8	AB	5878	MU54005380		intergenic_region
Canon	1	47371322	G	T	DOID:1612 / breast cancer/HML8	AB	5878	MU64777371		intergenic_region
Canon	1	47371502	G	A	DOID:4159 / skin cancer/HML8	AB	5878	MU46657918		intergenic_region
Canon	1	47371563	C	T	DOID:4159 / skin cancer/HML8	AB	5878	MU48994473		intergenic_region
Canon	1	47371583	C	T	DOID:4159 / skin cancer/HML8	AB	5878	MU52559679		intergenic_region
Canon	1	47371861	T	A	DOID:1612 / breast cancer/HML8	AB	5878	MU66453649		intergenic_region
Canon	1	47372341	C	T	DOID:1612 / breast cancer/HML8	AB	5878	MU64714281		intergenic_region
Canon	1	47372363	G	A	DOID:4159 / skin cancer/HML8	AB	5878	MU56922833		intergenic_region
Canon	1	47372541	G	A	DOID:4159 / skin cancer/HML8	AB	5878	MU55886457		intergenic_region
Canon	1	47372599	C	T	DOID:4159 / skin cancer/HML8	AB	5878	MU54724281		intergenic_region
Canon	1	47372739	G	A	DOID:4159 / skin cancer/HML8	AB	5878	MU48768781		intergenic_region
Canon	1	47372752	A	T	DOID:4159 / skin cancer/HML8	AB	5878	MU49788076		intergenic_region
Canon	1	47372794	C	T	DOID:1612 / breast cancer/HML8	AB	5878	MU65980775		intergenic_region
Canon	1	47372828	G	T	DOID:4159 / skin cancer/HML8	AB	5878	MU55451694		intergenic_region
Canon	1	47372856	C	T	DOID:4159 / skin cancer/HML8	AB	5878	MU51589094		intergenic_region
Canon	1	47372880	C	G	DOID:1612 / breast cancer/HML8	AB	5878	MU64714286		intergenic_region
Canon	1	47372892	T	G	DOID:4159 / skin cancer/HML8	AB	5878	MU58000006		intergenic_region
Canon	1	47372922	C	T	DOID:4159 / skin cancer/HML8	AB	5878	MU52446249		intergenic_region
Canon	1	47372988	A	C	DOID:5041 / esophageal cancer/HML8	AB	5878	MU19092883		intergenic_region
Canon	1	47373059	A	G	DOID:4159 / skin cancer/HML8	AB	5878	MU47094990		intergenic_region
Canon	1	47373108	G	A	DOID:4159 / skin cancer/HML8	AB	5878	MU53875870		intergenic_region
Canon	1	47373155	G	A	DOID:1793 / pancreatic cancer/HML8	AB	5878	MU30343346		intergenic_region
Canon	1	47373165	C	T	DOID:4159 / skin cancer/HML8	AB	5878	MU45337408		intergenic_region
Canon	1	47373542	C	T	DOID:4159 / skin cancer/HML8	AB	5878	MU52775943		intergenic_region
Canon	1	47373544	T	A	DOID:4159 / skin cancer/HML8	AB	5878	MU55113331		intergenic_region
Canon	1	47373591	C	T	DOID:1612 / breast cancer/HML8	AB	5878	MU63445393		intergenic_region
Noncanon	1	47418447	C	T	DOID:4159 / skin cancer/HERVW	GE	5881	MU44585634		intergenic_region
Noncanon	1	47418468	G	A	DOID:4159 / skin cancer/HERVW	GE	5881	MU43947477		intergenic_region
Noncanon	1	47418486	C	T	DOID:4159 / skin cancer/HERVW	GE	5881	MU42172305		intergenic_region
Noncanon	1	47418539	C	T	DOID:4159 / skin cancer/HERVW	GE	5881	MU37242943		intergenic_region
Noncanon	1	47418668	G	T	DOID:1612 / breast cancer/HERVW	GE	5881	MU68275184		intergenic_region
Noncanon	1	47418679	C	T	DOID:4159 / skin cancer/HERVW	GE	5881	MU39394977		intergenic_region
Noncanon	1	47418794	G	A	DOID:4159 / skin cancer/HERVW	GE	5881	MU58482454		intergenic_region
Noncanon	1	47418941	G	A	DOID:4159 / skin cancer/HERVW	GE	5881	MU59339524		intergenic_region
Noncanon	1	47418996	C	T	DOID:4159 / skin cancer/HERVW	GE	5881	MU41358589		intergenic_region
Noncanon	1	47419418	C	T	DOID:4159 / skin cancer/HERVW	GE	5881	MU53232607		intergenic_region
Noncanon	1	47419479	C	T	DOID:4159 / skin cancer/HERVW	GE	5881	MU57812654		intergenic_region
Noncanon	1	47419569	G	A	DOID:2531 / hematologic cancer/HERVW	GE	5881	MU54979459		intergenic_region
Noncanon	1	47419903	G	A	DOID:4159 / skin cancer/HERVW	GE	5881	MU41627089		intergenic_region
Noncanon	1	47419918	A	G	DOID:1793 / pancreatic cancer/HERVW	GE	5881	MU5649971		intergenic_region
Noncanon	1	47420058	C	T	DOID:4159 / skin cancer/HERVW	GE	5881	MU52348724		intergenic_region
Noncanon	1	47420236	G	A	DOID:263 / kidney cancer/HERVW	GE	5881	MU4078463		intergenic_region
Noncanon	1	47420272	C	T	DOID:4159 / skin cancer/HERVW	GE	5881	MU62438517		intergenic_region
Noncanon	1	47420273	C	T	DOID:4159 / skin cancer/HERVW	GE	5881	MU49597739		intergenic_region
Noncanon	1	47420429	G	A	DOID:4159 / skin cancer/HERVW	GE	5881	MU61396759		intergenic_region
Noncanon	1	47420595	C	T	DOID:4159 / skin cancer/HERVW	GE	5881	MU55149520		intergenic_region
Noncanon	1	47420771	C	T	DOID:4159 / skin cancer/HERVW	GE	5881	MU43200992		intergenic_region
Noncanon	1	47421003	G	A	DOID:1612 / breast cancer/HERVW	GE	5881	MU66805331		intergenic_region
Noncanon	1	47421145	G	C	DOID:1612 / breast cancer/HERVW	GE	5881	MU64896398		intergenic_region
Noncanon	1	47421251	G	A	DOID:4159 / skin cancer/HERVW	GE	5881	MU54463555		intergenic_region
Noncanon	1	47421554	C	T	DOID:1612 / breast cancer/HERVW	GE	5881	MU65127258		intergenic_region
Noncanon	1	47421554	C	T	DOID:1612 / breast cancer/HERVW	GE	5881	COSN21620505	.	.
Noncanon	1	47421705	G	A	DOID:4159 / skin cancer/HERVW	GE	5881	MU63182516		intergenic_region
Noncanon	1	47421801	C	T	DOID:4159 / skin cancer/HERVW	GE	5881	MU43114633		intergenic_region
Noncanon	1	47421824	T	C	DOID:1612 / breast cancer/HERVW	GE	5881	MU67009823		intergenic_region
Noncanon	1	47421942	G	A	DOID:4159 / skin cancer/HERVW	GE	5881	MU60072726		intergenic_region
Noncanon	1	47422085	C	T	DOID:4159 / skin cancer/HERVW	GE	5881	MU62223914		intergenic_region
Noncanon	1	47422186	G	A	DOID:4159 / skin cancer/HERVW	GE	5881	MU54554074		intergenic_region
Noncanon	1	47422428	C	T	DOID:4159 / skin cancer/HERVW	GE	5881	MU49498702		intergenic_region
Noncanon	1	47422481	C	T	DOID:4159 / skin cancer/HERVW	GE	5881	MU50414387		intergenic_region
Noncanon	1	47422660	C	T	DOID:4159 / skin cancer/HERVW	GE	5881	MU60812828		intergenic_region
Noncanon	1	47422673	C	T	DOID:4159 / skin cancer/HERVW	GE	5881	MU60077844		intergenic_region
Noncanon	1	47422712	G	A	DOID:4159 / skin cancer/HERVW	GE	5881	MU49862635		intergenic_region
Noncanon	1	47422795	G	A	DOID:4159 / skin cancer/HERVW	GE	5881	MU55531593		intergenic_region
Noncanon	1	47422811	G	A	DOID:4159 / skin cancer/HERVW	GE	5881	MU44195554		intergenic_region
Noncanon	1	47422845	G	A	DOID:5041 / esophageal cancer/HERVW	GE	5881	MU70647648		intergenic_region
Noncanon	1	47423120	C	T	DOID:4159 / skin cancer/HERVW	GE	5881	MU51541363		intergenic_region
Noncanon	1	47423156	C	T	DOID:4159 / skin cancer/HERVW	GE	5881	MU52647966		intergenic_region
Noncanon	1	47423299	G	T	DOID:4159 / skin cancer/HERVW	GE	5881	MU44251154		intergenic_region
Noncanon	1	47423307	G	A	DOID:4159 / skin cancer/HERVW	GE	5881	MU39222969		intergenic_region
Noncanon	1	47423349	G	A	DOID:4159 / skin cancer/HERVW	GE	5881	MU57489730		intergenic_region
Noncanon	1	47423504	G	A	DOID:4159 / skin cancer/HERVW	GE	5881	MU56829155		intergenic_region
Noncanon	1	47423606	G	A	DOID:4159 / skin cancer/HERVW	GE	5881	MU62596595		intergenic_region
Noncanon	1	47423690	G	A	DOID:4159 / skin cancer/HERVW	GE	5881	MU37764934		intergenic_region
Noncanon	1	47423731	C	T	DOID:4159 / skin cancer/HERVW	GE	5881	MU45489721		intergenic_region
Noncanon	1	47423757	G	A	DOID:4159 / skin cancer/HERVW	GE	5881	MU44901176		intergenic_region
Noncanon	1	47423958	C	T	DOID:4159 / skin cancer/HERVW	GE	5881	MU58351470		intergenic_region
Noncanon	1	47424005	T	G	DOID:4159 / skin cancer/HERVW	GE	5881	MU41052082		intergenic_region
Noncanon	1	47424174	C	T	DOID:4159 / skin cancer/HERVW	GE	5881	MU45168310		intergenic_region
Noncanon	1	47424221	A	G	DOID:4159 / skin cancer/HERVW	GE	5881	MU59567836		intergenic_region
Noncanon	1	47424298	C	T	DOID:4159 / skin cancer/HERVW	GE	5881	MU52933879		intergenic_region
Noncanon	1	47424513	A	G	DOID:4159 / skin cancer/HERVW	GE	5881	MU50578281		intergenic_region
Noncanon	1	47424516	C	T	DOID:4159 / skin cancer/HERVW	GE	5881	MU61449170		intergenic_region
Noncanon	1	47424617	G	A	DOID:4159 / skin cancer/HERVW	GE	5881	MU51626404		intergenic_region
Noncanon	1	47424819	A	T	DOID:4159 / skin cancer/HERVW	GE	5881	MU45729975		intergenic_region
Noncanon	1	47424969	C	T	DOID:4159 / skin cancer/HERVW	GE	5881	MU62651531		intergenic_region
Noncanon	1	47425027	A	G	DOID:2531 / hematologic cancer/HERVW	GE	5881	MU42515449		intergenic_region
Noncanon	1	47425148	G	A	DOID:4159 / skin cancer/HERVW	GE	5881	MU48450424		intergenic_region
Noncanon	1	47425464	G	A	DOID:4159 / skin cancer/HERVW	GE	5881	MU44377638		intergenic_region
Noncanon	1	47425511	G	A	DOID:4159 / skin cancer/HERVW	GE	5881	MU58093709		intergenic_region
Noncanon	1	47425563	G	A	DOID:4159 / skin cancer/HERVW	GE	5881	MU60047199		intergenic_region
Noncanon	1	47425620	C	T	DOID:4159 / skin cancer/HERVW	GE	5881	MU61311754		intergenic_region
Noncanon	1	47425810	G	A	DOID:4159 / skin cancer/HERVW	GE	5881	MU46513631		intergenic_region
Noncanon	1	47425817	C	T	DOID:4159 / skin cancer/HERVW	GE	5881	MU59705503		intergenic_region
Noncanon	1	47426062	G	A	DOID:4159 / skin cancer/HERVW	GE	5881	MU56679179		intergenic_region
Noncanon	1	47426262	G	A	DOID:4159 / skin cancer/HERVW	GE	5881	MU61602378		intergenic_region
Noncanon	1	47426313	A	C	DOID:1612 / breast cancer/HERVW	GE	5881	MU66847072		intergenic_region
Noncanon	1	47426432	G	A	DOID:4159 / skin cancer/HERVW	GE	5881	MU61666051		intergenic_region
Noncanon	1	47426587	C	T	DOID:4159 / skin cancer/HERVW	GE	5881	MU36267191		intergenic_region
Noncanon	1	47426597	G	A	DOID:4159 / skin cancer/HERVW	GE	5881	MU51427939		intergenic_region
Noncanon	1	47426648	G	A	DOID:4159 / skin cancer/HERVW	GE	5881	MU49319602		intergenic_region
Noncanon	1	47426936	G	A	DOID:4159 / skin cancer/HERVW	GE	5881	MU52279273		intergenic_region
Noncanon	1	47426975	G	T	DOID:4159 / skin cancer/HERVW	GE	5881	MU58612704		intergenic_region
Noncanon	1	47427078	G	A	DOID:4159 / skin cancer/HERVW	GE	5881	MU35621102	CYP4X1	5_prime_UTR_variant
Noncanon	1	47427132	C	T	DOID:4159 / skin cancer/HERVW	GE	5881	MU45703112	CYP4X1	5_prime_UTR_premature_start_codon_gain_variant
Noncanon	1	47427459	C	T	DOID:4159 / skin cancer/HERVW	GE	5881	MU59018740	CYP4X1	intron_variant
Noncanon	1	47427573	G	A	DOID:4159 / skin cancer/HERVW	GE	5881	MU51823526	CYP4X1	intron_variant
Noncanon	1	47427728	C	T	DOID:4159 / skin cancer/HERVW	GE	5881	MU61751629	CYP4X1	intron_variant
Noncanon	1	47428053	G	A	DOID:3571 / liver cancer/HERVW	GE	5881	MU5659209	CYP4X1	intron_variant
Noncanon	1	47428201	C	A	DOID:4159 / skin cancer/HERVW	GE	5881	MU45612001	CYP4X1	intron_variant
Noncanon	1	47428791	C	T	DOID:4159 / skin cancer/HERVW	GE	5881	MU48630270	CYP4X1	intron_variant
Noncanon	1	47428840	C	T	DOID:4159 / skin cancer/HERVW	GE	5881	MU56815731	CYP4X1	intron_variant
Noncanon	1	47429134	C	T	DOID:4159 / skin cancer/HERVW	GE	5881	MU50808364	CYP4X1	intron_variant
Noncanon	1	47429301	G	A	DOID:4159 / skin cancer/HERVW	GE	5881	MU71298462	CYP4X1	intron_variant
Noncanon	1	47429368	C	T	DOID:4159 / skin cancer/HERVW	GE	5881	MU54220949	CYP4X1	intron_variant
Noncanon	1	47429752	G	A	DOID:4159 / skin cancer/HERVW	GE	5881	MU48605774	CYP4X1	intron_variant
Noncanon	1	47429916	C	G	DOID:1612 / breast cancer/HERVW	GE	5881	MU65485146	CYP4X1	intron_variant
Noncanon	1	47430101	C	T	DOID:4159 / skin cancer/HERVW	GE	5881	MU38686056	CYP4X1	intron_variant
Noncanon	1	47430121	C	T	DOID:4159 / skin cancer/HERVW	GE	5881	MU54525926	CYP4X1	intron_variant
Noncanon	1	47430202	C	T	DOID:4159 / skin cancer/HERVW	GE	5881	MU42395720	CYP4X1	intron_variant
Noncanon	1	47430357	C	T	DOID:4159 / skin cancer/HERVW	GE	5881	MU55637949	CYP4X1	intron_variant
Noncanon	1	47430622	C	T	DOID:3571 / liver cancer/HERVW	GE	5881	MU1117193	CYP4X1	intron_variant
Noncanon	1	47430719	G	A	DOID:4159 / skin cancer/HERVW	GE	5881	MU42438668	CYP4X1	intron_variant
Noncanon	1	47430777	G	A	DOID:4159 / skin cancer/HERVW	GE	5881	MU52094760	CYP4X1	intron_variant
Noncanon	1	47430818	C	T	DOID:4159 / skin cancer/HERVW	GE	5881	MU43973608	CYP4X1	intron_variant
Noncanon	1	47431119	C	T	DOID:4159 / skin cancer/HERVW	GE	5881	MU48048408	CYP4X1	intron_variant
Canon	1	48674827	G	A	DOID:4159 / skin cancer/HERVH	GE	5882	MU33176741		intergenic_region
Canon	1	48675210	G	A	DOID:4159 / skin cancer/HERVH	GE	5882	MU51975823		intergenic_region
Canon	1	48675225	G	A	DOID:4159 / skin cancer/HERVH	GE	5882	MU59925291		intergenic_region
Canon	1	48675316	G	A	DOID:3571 / liver cancer/HERVH	GE	5882	MU3625837		intergenic_region
Canon	1	48675368	G	A	DOID:4159 / skin cancer/HERVH	GE	5882	MU58490327		intergenic_region
Canon	1	48675842	G	A	DOID:2394 / ovarian cancer/HERVH	GE	5882	MU5347046		intergenic_region
Canon	1	48676256	G	A	DOID:4159 / skin cancer/HERVH	GE	5882	MU50896314		intergenic_region
Canon	1	48676866	T	C	DOID:4159 / skin cancer/HERVH	GE	5882	MU55967275		intergenic_region
Canon	1	48677319	G	T	DOID:1324 / lung cancer/HERVH	GE	5882	MU50263711		intergenic_region
Canon	1	48677335	G	A	DOID:219 / colon cancer/HERVH	GE	5882	MU43430166		intergenic_region
Canon	1	48677360	T	C	DOID:219 / colon cancer/HERVH	GE	5882	MU43430241		intergenic_region
Canon	1	48677388	A	G	DOID:3571 / liver cancer/HERVH	GE	5882	MU51391977		intergenic_region
Canon	1	48677435	G	A	DOID:4159 / skin cancer/HERVH	GE	5882	MU40790553		intergenic_region
Canon	1	48677584	T	C	DOID:3571 / liver cancer/HERVH	GE	5882	MU42732064		intergenic_region
Canon	1	48678164	G	A	DOID:1793 / pancreatic cancer/HERVH	GE	5882	MU5654887		intergenic_region
Canon	1	48678595	G	A	DOID:4159 / skin cancer/HERVH	GE	5882	MU62867753		intergenic_region
Canon	1	48678618	C	T	DOID:4159 / skin cancer/HERVH	GE	5882	MU49589250		intergenic_region
Canon	1	48678799	A	T	DOID:2531 / hematologic cancer/HERVH	GE	5882	MU41389196		intergenic_region
Canon	1	48679582	G	A	DOID:4159 / skin cancer/HERVH	GE	5882	MU42293709		intergenic_region
Canon	1	48679681	C	T	DOID:1612 / breast cancer/HERVH	GE	5882	MU66847082		intergenic_region
Canon	1	48679958	T	A	DOID:1612 / breast cancer/HERVH	GE	5882	MU64982117		intergenic_region
Canon	1	48680194	G	A	DOID:4159 / skin cancer/HERVH	GE	5882	MU44283134		intergenic_region
Noncanon	1	48903725	A	G	DOID:3571 / liver cancer/HERV9	GE	5883	MU2600194	SPATA6	intron_variant
Noncanon	1	48903963	G	A	DOID:3571 / liver cancer/HERV9	GE	5883	MU70061945	SPATA6	intron_variant
Noncanon	1	48903977	C	G	DOID:1324 / lung cancer/HERV9	GE	5883	MU40958798	SPATA6	intron_variant
Noncanon	1	48904045	G	T	DOID:5041 / esophageal cancer/HERV9	GE	5883	MU19093267	SPATA6	intron_variant
Noncanon	1	48904462	G	A	DOID:4159 / skin cancer/HERV9	GE	5883	MU62595672	SPATA6	intron_variant
Noncanon	1	48905033	G	A	DOID:5041 / esophageal cancer/HERV9	GE	5883	MU71121150	SPATA6	intron_variant
Noncanon	1	48905709	G	C	DOID:1612 / breast cancer/HERV9	GE	5883	MU63859434	SPATA6	intron_variant
Noncanon	1	48906417	C	T	DOID:1324 / lung cancer/HERV9	GE	5883	MU54910279	SPATA6	intron_variant
Noncanon	1	48906542	C	A	DOID:263 / kidney cancer/HERV9	GE	5883	MU4150883	SPATA6	intron_variant
Noncanon	1	48906867	C	T	DOID:4159 / skin cancer/HERV9	GE	5883	MU34455782	SPATA6	intron_variant
Noncanon	1	48907135	C	A	DOID:4159 / skin cancer/HERV9	GE	5883	MU35277419	SPATA6	intron_variant
Noncanon	1	48907230	G	A	DOID:4159 / skin cancer/HERV9	GE	5883	MU57338325	SPATA6	intron_variant
Noncanon	1	48907279	C	G	DOID:2394 / ovarian cancer/HERV9	GE	5883	MU5348011	SPATA6	intron_variant
Noncanon	1	48907869	C	T	DOID:3571 / liver cancer/HERV9	GE	5883	MU3058436	SPATA6	intron_variant
Noncanon	1	48907964	A	T	DOID:1612 / breast cancer/HERV9	GE	5883	MU66792086	SPATA6	intron_variant
Noncanon	1	48908124	C	T	DOID:5041 / esophageal cancer/HERV9	GE	5883	MU69121362	SPATA6	intron_variant
Noncanon	1	48908376	G	A	DOID:3571 / liver cancer/HERV9	GE	5883	MU5664086	SPATA6	intron_variant
Noncanon	1	48908802	C	T	DOID:1612 / breast cancer/HERV9	GE	5883	MU63859437	SPATA6	intron_variant
Noncanon	1	48909061	C	G	DOID:4159 / skin cancer/HERV9	GE	5883	MU53239877	SPATA6	intron_variant
Noncanon	1	48909132	C	A	DOID:5041 / esophageal cancer/HERV9	GE	5883	MU18541208	SPATA6	intron_variant
Noncanon	1	48909565	G	A	DOID:4159 / skin cancer/HERV9	GE	5883	MU59833495	SPATA6	intron_variant
Noncanon	1	48909952	C	T	DOID:4159 / skin cancer/HERV9	GE	5883	MU49284066	SPATA6	intron_variant
Noncanon	1	48910200	C	A	DOID:10283 / prostate cancer/HERV9	GE	5883	MU54817101	SPATA6	intron_variant
Noncanon	1	48910490	G	A	DOID:2531 / hematologic cancer/HERV9	GE	5883	MU56676287	SPATA6	intron_variant
Noncanon	1	48910764	G	A	DOID:4159 / skin cancer/HERV9	GE	5883	MU61641795	SPATA6	intron_variant
Noncanon	1	48910975	T	C	DOID:3571 / liver cancer/HERV9	GE	5883	MU2432743	SPATA6	intron_variant
Noncanon	1	48911676	A	G	DOID:1793 / pancreatic cancer/HERV9	GE	5883	MU40550362	SPATA6	intron_variant
Noncanon	1	48911907	A	C	DOID:3571 / liver cancer/HERV9	GE	5883	MU31113353	SPATA6	intron_variant
Noncanon	1	48912019	G	T	DOID:1612 / breast cancer/HERV9	GE	5883	MU67062940	SPATA6	intron_variant
Noncanon	1	48912158	C	A	DOID:5041 / esophageal cancer/HERV9	GE	5883	MU70517782	SPATA6	intron_variant
Noncanon	1	48979079	A	G	DOID:3571 / liver cancer/HML3	AB	5884	MU29575657		intergenic_region
Noncanon	1	48979148	G	A	DOID:4159 / skin cancer/HML3	AB	5884	MU55243366		intergenic_region
Noncanon	1	48979287	C	T	DOID:4159 / skin cancer/HML3	AB	5884	MU56722062		intergenic_region
Noncanon	1	48979344	G	A	DOID:4159 / skin cancer/HML3	AB	5884	MU48480357		intergenic_region
Noncanon	1	48979442	C	T	DOID:4159 / skin cancer/HML3	AB	5884	MU51664875		intergenic_region
Noncanon	1	48979579	G	A	DOID:4159 / skin cancer/HML3	AB	5884	MU52672504		intergenic_region
Noncanon	1	48979773	A	G	DOID:4159 / skin cancer/HML3	AB	5884	MU41361460		intergenic_region
Noncanon	1	48979908	C	A	DOID:1612 / breast cancer/HML3	AB	5884	MU65926136		intergenic_region
Noncanon	1	48979985	G	A	DOID:2531 / hematologic cancer/HML3	AB	5884	MU54621806		intergenic_region
Noncanon	1	48980174	A	C	DOID:4159 / skin cancer/HML3	AB	5884	MU56616241		intergenic_region
Noncanon	1	48980753	G	C	DOID:1612 / breast cancer/HML3	AB	5884	MU65966465		intergenic_region
Noncanon	1	48981542	C	T	DOID:4159 / skin cancer/HML3	AB	5884	MU44180009		intergenic_region
Noncanon	1	48981562	A	G	DOID:4159 / skin cancer/HML3	AB	5884	MU34721147		intergenic_region
Noncanon	1	48981592	A	T	DOID:4159 / skin cancer/HML3	AB	5884	MU41520752		intergenic_region
Noncanon	1	48981652	G	A	DOID:1612 / breast cancer/HML3	AB	5884	MU64957062		intergenic_region
Noncanon	1	48981665	A	C	DOID:2531 / hematologic cancer/HML3	AB	5884	MU69555060		intergenic_region
Noncanon	1	48981997	G	A	DOID:4159 / skin cancer/HML3	AB	5884	MU52856655		intergenic_region
Noncanon	1	48982008	C	T	DOID:4159 / skin cancer/HML3	AB	5884	MU45135610		intergenic_region
Noncanon	1	48982159	C	T	DOID:4159 / skin cancer/HML3	AB	5884	MU54316124		intergenic_region
Noncanon	1	48982225	C	T	DOID:4159 / skin cancer/HML3	AB	5884	MU58339929		intergenic_region
Noncanon	1	48982298	C	T	DOID:4159 / skin cancer/HML3	AB	5884	MU49266721		intergenic_region
Noncanon	1	48982537	G	A	DOID:4159 / skin cancer/HML3	AB	5884	MU45011800		intergenic_region
Noncanon	1	48982574	C	T	DOID:4159 / skin cancer/HML3	AB	5884	MU60263951		intergenic_region
Noncanon	1	48983677	G	A	DOID:4159 / skin cancer/HML3	AB	5884	MU44870539		intergenic_region
Noncanon	1	48983844	A	C	DOID:1612 / breast cancer/HML3	AB	5884	MU65762283		intergenic_region
Noncanon	1	48984007	G	A	DOID:4159 / skin cancer/HML3	AB	5884	MU39018291		intergenic_region
Noncanon	1	48984140	A	G	DOID:1612 / breast cancer/HML3	AB	5884	MU65180463		intergenic_region
Noncanon	1	48984343	C	T	DOID:4159 / skin cancer/HML3	AB	5884	MU55554763		intergenic_region
Noncanon	1	48984424	C	T	DOID:4159 / skin cancer/HML3	AB	5884	MU59380251		intergenic_region
Noncanon	1	48984520	C	T	DOID:4159 / skin cancer/HML3	AB	5884	MU48523817		intergenic_region
Noncanon	1	48984675	G	A	DOID:4159 / skin cancer/HML3	AB	5884	MU53872825		intergenic_region
Noncanon	1	48984799	C	T	DOID:4159 / skin cancer/HML3	AB	5884	MU49155487		intergenic_region
Noncanon	1	48985075	G	A	DOID:1612 / breast cancer/HML3	AB	5884	COSN22672727	.	.
Noncanon	1	48985307	G	A	DOID:3571 / liver cancer/HML3	AB	5884	MU31291713		intergenic_region
Noncanon	1	48985402	C	T	DOID:5041 / esophageal cancer/HML3	AB	5884	MU2234336		intergenic_region
Noncanon	1	48985403	G	A	DOID:4159 / skin cancer/HML3	AB	5884	MU44971235		intergenic_region
Noncanon	1	48985435	G	A	DOID:5041 / esophageal cancer/HML3	AB	5884	MU70097155		intergenic_region
Noncanon	1	48985440	G	A	DOID:4159 / skin cancer/HML3	AB	5884	MU44899013		intergenic_region
Noncanon	1	48985484	G	A	DOID:4159 / skin cancer/HML3	AB	5884	MU34455838		intergenic_region
Noncanon	1	48985629	C	T	DOID:4159 / skin cancer/HML3	AB	5884	MU55235597		intergenic_region
Noncanon	1	48985642	G	A	DOID:4159 / skin cancer/HML3	AB	5884	MU60535041		intergenic_region
Noncanon	1	48985747	C	T	DOID:4159 / skin cancer/HML3	AB	5884	MU55838975		intergenic_region
Noncanon	1	48985772	C	A	DOID:3571 / liver cancer/HML3	AB	5884	MU28766809		intergenic_region
Canon	1	52683019	T	G	DOID:4159 / skin cancer/HERVIP	GE	5889	MU40392282	ZFYVE9	intron_variant
Canon	1	52683363	C	T	DOID:4159 / skin cancer/HERVIP	GE	5889	MU59365529	ZFYVE9	intron_variant
Canon	1	52683504	C	T	DOID:4159 / skin cancer/HERVIP	GE	5889	MU51480372	ZFYVE9	intron_variant
Canon	1	52684150	A	G	DOID:3571 / liver cancer/HERVIP	GE	5889	MU53391793	ZFYVE9	intron_variant
Canon	1	52685070	G	A	DOID:1793 / pancreatic cancer/HERVIP	GE	5889	MU28915424	ZFYVE9	intron_variant
Canon	1	52685254	C	T	DOID:4159 / skin cancer/HERVIP	GE	5889	MU44305581	ZFYVE9	intron_variant
Canon	1	52685258	G	A	DOID:4159 / skin cancer/HERVIP	GE	5889	MU53900407	ZFYVE9	intron_variant
Canon	1	52686140	G	A	DOID:1612 / breast cancer/HERVIP	GE	5889	MU64409324	ZFYVE9	intron_variant
Canon	1	52686481	G	A	DOID:5041 / esophageal cancer/HERVIP	GE	5889	MU25983190	ZFYVE9	intron_variant
Canon	1	52686607	C	T	DOID:1612 / breast cancer/HERVIP	GE	5889	MU2084260	ZFYVE9	intron_variant
Canon	1	52686688	C	G	DOID:1612 / breast cancer/HERVIP	GE	5889	MU2084270	ZFYVE9	intron_variant
Canon	1	52687175	C	G	DOID:1612 / breast cancer/HERVIP	GE	5889	MU2084310	ZFYVE9	intron_variant
Canon	1	52687239	C	T	DOID:4159 / skin cancer/HERVIP	GE	5889	MU54822473	ZFYVE9	intron_variant
Canon	1	52687437	C	A	DOID:4159 / skin cancer/HERVIP	GE	5889	MU62115280	ZFYVE9	intron_variant
Canon	1	52687615	C	T	DOID:1612 / breast cancer/HERVIP	GE	5889	MU2084331	ZFYVE9	intron_variant
Canon	1	52687643	C	T	DOID:4159 / skin cancer/HERVIP	GE	5889	MU42341257	ZFYVE9	intron_variant
Canon	1	52687705	G	A	DOID:263 / kidney cancer/HERVIP	GE	5889	MU4019115	ZFYVE9	intron_variant
Canon	1	52688418	C	T	DOID:4159 / skin cancer/HERVIP	GE	5889	MU52569513	ZFYVE9	intron_variant
Canon	1	52688633	T	C	DOID:4159 / skin cancer/HERVIP	GE	5889	MU58030972	ZFYVE9	intron_variant
Canon	1	52689777	C	T	DOID:4159 / skin cancer/HERVIP	GE	5889	MU61701449	ZFYVE9	intron_variant
Canon	1	52690459	G	A	DOID:2394 / ovarian cancer/HERVIP	GE	5889	MU5368616	ZFYVE9	intron_variant
Canon	1	52690672	A	T	DOID:5041 / esophageal cancer/HERVIP	GE	5889	MU2232627	ZFYVE9	intron_variant
Canon	1	52691023	C	T	DOID:4159 / skin cancer/HERVIP	GE	5889	MU60423309	ZFYVE9	intron_variant
Noncanon	1	53890348	C	G	DOID:1612 / breast cancer/HERVH	GE	5890	MU65966729	SLC25A3P1	intron_variant
Noncanon	1	53890457	G	A	DOID:2531 / hematologic cancer/HERVH	GE	5890	MU1438542	SLC25A3P1	intron_variant
Noncanon	1	53890929	C	T	DOID:4159 / skin cancer/HERVH	GE	5890	MU53085988	SLC25A3P1	intron_variant
Noncanon	1	53891025	G	A	DOID:1793 / pancreatic cancer/HERVH	GE	5890	MU5684119	SLC25A3P1	intron_variant
Noncanon	1	53891087	C	T	DOID:4159 / skin cancer/HERVH	GE	5890	MU41032664	SLC25A3P1	intron_variant
Noncanon	1	53891096	C	T	DOID:4159 / skin cancer/HERVH	GE	5890	MU52247566	SLC25A3P1	intron_variant
Noncanon	1	53891103	T	C	DOID:3571 / liver cancer/HERVH	GE	5890	MU50263814	SLC25A3P1	intron_variant
Noncanon	1	53891150	C	T	DOID:4159 / skin cancer/HERVH	GE	5890	MU46830030	SLC25A3P1	intron_variant
Noncanon	1	53891466	C	T	DOID:4159 / skin cancer/HERVH	GE	5890	MU61732384	SLC25A3P1	intron_variant
Noncanon	1	53891912	A	G	DOID:3571 / liver cancer/HERVH	GE	5890	MU43608345	SLC25A3P1	intron_variant
Noncanon	1	53891991	C	A	DOID:4159 / skin cancer/HERVH	GE	5890	MU49967664	SLC25A3P1	intron_variant
Noncanon	1	53892081	A	G	DOID:1324 / lung cancer/HERVH	GE	5890	MU56971569	SLC25A3P1	intron_variant
Noncanon	1	53892306	C	T	DOID:3571 / liver cancer/HERVH	GE	5890	MU2488573	SLC25A3P1	intron_variant
Noncanon	1	53892488	C	T	DOID:5041 / esophageal cancer/HERVH	GE	5890	MU21129265	SLC25A3P1	intron_variant
Noncanon	1	53892526	C	A	DOID:4159 / skin cancer/HERVH	GE	5890	MU55918459	SLC25A3P1	intron_variant
Noncanon	1	53892527	C	T	DOID:4159 / skin cancer/HERVH	GE	5890	MU60379048	SLC25A3P1	intron_variant
Noncanon	1	53892759	C	T	DOID:4159 / skin cancer/HERVH	GE	5890	MU60196562	SLC25A3P1	intron_variant
Noncanon	1	53892836	C	T	DOID:4159 / skin cancer/HERVH	GE	5890	MU43430184	SLC25A3P1	intron_variant
Noncanon	1	53892882	C	T	DOID:4159 / skin cancer/HERVH	GE	5890	MU50735178	SLC25A3P1	intron_variant
Noncanon	1	53892899	C	T	DOID:4159 / skin cancer/HERVH	GE	5890	MU49510513	SLC25A3P1	intron_variant
Noncanon	1	53893157	C	T	DOID:4159 / skin cancer/HERVH	GE	5890	MU62185880	SLC25A3P1	intron_variant
Noncanon	1	53893203	C	T	DOID:4159 / skin cancer/HERVH	GE	5890	MU42376432	SLC25A3P1	intron_variant
Noncanon	1	53893723	C	G	DOID:1793 / pancreatic cancer/HERVH	GE	5890	MU5684143	SLC25A3P1	intron_variant
Noncanon	1	53893770	C	T	DOID:4159 / skin cancer/HERVH	GE	5890	MU42384788	SLC25A3P1	intron_variant
Noncanon	1	53894137	C	T	DOID:4159 / skin cancer/HERVH	GE	5890	MU46195200	SLC25A3P1	intron_variant
Noncanon	1	53894194	T	G	DOID:10283 / prostate cancer/HERVH	GE	5890	MU31541518	SLC25A3P1	intron_variant
Noncanon	1	53894228	C	T	DOID:4159 / skin cancer/HERVH	GE	5890	MU57116729	SLC25A3P1	intron_variant
Noncanon	1	53894685	C	T	DOID:4159 / skin cancer/HERVH	GE	5890	MU45187770	SLC25A3P1	intron_variant
Noncanon	1	53895013	C	T	DOID:4159 / skin cancer/HERVH	GE	5890	MU39223129	SLC25A3P1	intron_variant
Noncanon	1	53895328	C	T	DOID:1793 / pancreatic cancer/HERVH	GE	5890	MU5684155	SLC25A3P1	intron_variant
Noncanon	1	53895524	C	T	DOID:2531 / hematologic cancer/HERVH	GE	5890	MU69032458	SLC25A3P1	intron_variant
Noncanon	1	53895637	G	A	DOID:4159 / skin cancer/HERVH	GE	5890	MU58568170	SLC25A3P1	intron_variant
Noncanon	1	53896308	C	T	DOID:4159 / skin cancer/HERVH	GE	5890	MU46383495	SLC25A3P1	intron_variant
Noncanon	1	53896445	T	A	DOID:1793 / pancreatic cancer/HERVH	GE	5890	MU30505404	SLC25A3P1	intron_variant
Noncanon	1	53896840	C	T	DOID:4159 / skin cancer/HERVH	GE	5890	MU59626483	SLC25A3P1	intron_variant
Noncanon	1	53897013	A	G	DOID:4159 / skin cancer/HERVH	GE	5890	MU58857506	SLC25A3P1	intron_variant
Noncanon	1	53897039	C	T	DOID:4159 / skin cancer/HERVH	GE	5890	MU55031221	SLC25A3P1	intron_variant
Noncanon	1	53897724	C	T	DOID:4159 / skin cancer/HERVH	GE	5890	MU46588692	SLC25A3P1	intron_variant
Noncanon	1	53897921	A	T	DOID:2394 / ovarian cancer/HERVH	GE	5890	MU5373748	SLC25A3P1	intron_variant
Noncanon	1	53898440	C	T	DOID:4159 / skin cancer/HERVH	GE	5890	MU56053536	SLC25A3P1	intron_variant
Noncanon	1	53898489	G	A	DOID:4159 / skin cancer/HERVH	GE	5890	MU60063190	SLC25A3P1	intron_variant
Noncanon	1	53898560	C	T	DOID:4159 / skin cancer/HERVH	GE	5890	MU35365032	SLC25A3P1	intron_variant
Noncanon	1	53898561	C	T	DOID:4159 / skin cancer/HERVH	GE	5890	MU52807883	SLC25A3P1	intron_variant
Noncanon	1	53900781	C	T	DOID:4159 / skin cancer/MER34	GE	5891	MU45933137	SLC25A3P1	downstream_gene_variant
Noncanon	1	53901112	G	A	DOID:1793 / pancreatic cancer/MER34	GE	5891	MU5684195	SLC25A3P1	downstream_gene_variant
Noncanon	1	53901385	G	A	DOID:4159 / skin cancer/MER34	GE	5891	MU62051929	SLC25A3P1	downstream_gene_variant
Noncanon	1	53901770	G	A	DOID:4159 / skin cancer/MER34	GE	5891	MU60622612	SLC25A3P1	downstream_gene_variant
Noncanon	1	53901860	G	A	DOID:4159 / skin cancer/MER34	GE	5891	MU59069980	SLC25A3P1	downstream_gene_variant
Noncanon	1	53901941	C	T	DOID:1612 / breast cancer/MER34	GE	5891	MU66369248	SLC25A3P1	downstream_gene_variant
Noncanon	1	53902154	C	T	DOID:4159 / skin cancer/MER34	GE	5891	MU47061864	SLC25A3P1	downstream_gene_variant
Noncanon	1	53902183	G	A	DOID:4159 / skin cancer/MER34	GE	5891	MU57324155	SLC25A3P1	downstream_gene_variant
Noncanon	1	53902311	C	T	DOID:4159 / skin cancer/MER34	GE	5891	MU58081974	SLC25A3P1	downstream_gene_variant
Noncanon	1	53902686	C	T	DOID:4159 / skin cancer/MER34	GE	5891	MU58330217	SLC25A3P1	downstream_gene_variant
Noncanon	1	53903118	C	T	DOID:4159 / skin cancer/MER34	GE	5891	MU57710597	SLC25A3P1	downstream_gene_variant
Noncanon	1	53903527	C	T	DOID:4159 / skin cancer/MER34	GE	5891	MU56787416	SLC25A3P1	downstream_gene_variant
Noncanon	1	53903727	G	A	DOID:4159 / skin cancer/MER34	GE	5891	MU62393208	SLC25A3P1	downstream_gene_variant
Noncanon	1	53903738	G	A	DOID:4159 / skin cancer/MER34	GE	5891	MU61466303	SLC25A3P1	downstream_gene_variant
Noncanon	1	53903824	C	T	DOID:4159 / skin cancer/MER34	GE	5891	MU58371954	SLC25A3P1	downstream_gene_variant
Noncanon	1	53903859	G	A	DOID:4362 / cervical cancer/MER34	GE	5891	MU29268981	SLC25A3P1	downstream_gene_variant
Noncanon	1	53904350	G	T	DOID:1612 / breast cancer/MER34	GE	5891	COSN23014387	.	.
Noncanon	1	53904389	G	C	DOID:1612 / breast cancer/MER34	GE	5891	COSN23014388	.	SNP
Noncanon	1	53905126	G	A	DOID:1793 / pancreatic cancer/MER34	GE	5891	MU11434215	SLC25A3P1	upstream_gene_variant
Noncanon	1	53905302	C	T	DOID:4159 / skin cancer/MER34	GE	5891	MU50260835	SLC25A3P1	upstream_gene_variant
Noncanon	1	53905305	C	T	DOID:4159 / skin cancer/MER34	GE	5891	MU60456115	SLC25A3P1	upstream_gene_variant
Noncanon	1	53905579	G	T	DOID:4159 / skin cancer/MER34	GE	5891	MU40781298	SLC25A3P1	upstream_gene_variant
Noncanon	1	53905935	G	A	DOID:4159 / skin cancer/MER34	GE	5891	MU47526060		intergenic_region
Noncanon	1	53906656	A	T	DOID:263 / kidney cancer/MER34	GE	5891	MU4234228		intergenic_region
Noncanon	1	53906911	G	A	DOID:4159 / skin cancer/MER34	GE	5891	MU43467016		intergenic_region
Noncanon	1	53907413	G	A	DOID:4159 / skin cancer/MER34	GE	5891	MU50356502		intergenic_region
Noncanon	1	53907485	C	T	DOID:4159 / skin cancer/MER34	GE	5891	MU59724036		intergenic_region
Noncanon	1	53907860	C	T	DOID:2531 / hematologic cancer/MER34	GE	5891	MU69555469		intergenic_region
Noncanon	1	53908327	G	C	DOID:1793 / pancreatic cancer/MER34	GE	5891	MU11434216		intergenic_region
Noncanon	1	53908456	T	G	DOID:4159 / skin cancer/MER34	GE	5891	MU50264865		intergenic_region
Noncanon	1	53909311	C	T	DOID:1324 / lung cancer/MER34	GE	5891	MU49756267		intergenic_region
Noncanon	1	53909548	C	T	DOID:1324 / lung cancer/MER34	GE	5891	MU40970968		intergenic_region
Noncanon	1	53910339	C	T	DOID:4159 / skin cancer/MER34	GE	5891	MU53639604		intergenic_region
Noncanon	1	53910425	T	C	DOID:4159 / skin cancer/MER34	GE	5891	MU38054943		intergenic_region
Noncanon	1	53910549	G	A	DOID:4159 / skin cancer/MER34	GE	5891	MU49760528		intergenic_region
Noncanon	1	53910568	G	T	DOID:4159 / skin cancer/MER34	GE	5891	MU46034094		intergenic_region
Noncanon	1	53911397	C	T	DOID:4159 / skin cancer/MER34	GE	5891	MU59491832		intergenic_region
Noncanon	1	53911471	G	A	DOID:4159 / skin cancer/MER34	GE	5891	MU63072620		intergenic_region
Noncanon	1	53911721	G	A	DOID:4159 / skin cancer/MER34	GE	5891	MU47134181		intergenic_region
Noncanon	1	53911826	T	A	DOID:1612 / breast cancer/MER34	GE	5891	MU65189421		intergenic_region
Noncanon	1	53911899	G	A	DOID:4159 / skin cancer/MER34	GE	5891	MU45084108		intergenic_region
Noncanon	1	53911899	G	T	DOID:3571 / liver cancer/MER34	GE	5891	MU2646627		intergenic_region
Noncanon	1	53911975	T	C	DOID:2394 / ovarian cancer/MER34	GE	5891	MU5373829		intergenic_region
Noncanon	1	53912331	G	A	DOID:4159 / skin cancer/MER34	GE	5891	MU46464952		intergenic_region
Noncanon	1	53912467	C	T	DOID:4159 / skin cancer/MER34	GE	5891	MU43378189		intergenic_region
Noncanon	1	53912490	C	T	DOID:3571 / liver cancer/MER34	GE	5891	MU1204031		intergenic_region
Noncanon	1	53912717	C	T	DOID:4159 / skin cancer/MER34	GE	5891	MU58172290		intergenic_region
Noncanon	1	53913011	C	G	DOID:1324 / lung cancer/MER34	GE	5891	MU40971021		intergenic_region
Noncanon	1	53913050	C	T	DOID:2394 / ovarian cancer/MER34	GE	5891	MU5373841		intergenic_region
Noncanon	1	53913523	G	A	DOID:2394 / ovarian cancer/MER34	GE	5891	COSN8473896	.	.
Noncanon	1	53913795	T	G	DOID:1793 / pancreatic cancer/MER34	GE	5891	MU5684225		intergenic_region
Noncanon	1	53913943	C	A	DOID:5041 / esophageal cancer/MER34	GE	5891	MU35664931		intergenic_region
Noncanon	1	53914395	C	G	DOID:263 / kidney cancer/MER34	GE	5891	MU3929139		intergenic_region
Noncanon	1	53914523	A	G	DOID:5041 / esophageal cancer/MER34	GE	5891	MU71176661		intergenic_region
Noncanon	1	53914789	G	A	DOID:4159 / skin cancer/MER34	GE	5891	MU38686470		intergenic_region
Noncanon	1	53914855	A	G	DOID:1793 / pancreatic cancer/MER34	GE	5891	COSN16665785	.	.
Noncanon	1	53914953	C	T	DOID:1612 / breast cancer/MER34	GE	5891	MU67285663		intergenic_region
Noncanon	1	53915055	C	T	DOID:4159 / skin cancer/MER34	GE	5891	MU44332140		intergenic_region
Noncanon	1	53915133	C	A	DOID:2394 / ovarian cancer/MER34	GE	5891	MU5373906		intergenic_region
Noncanon	1	53915362	C	T	DOID:4159 / skin cancer/MER34	GE	5891	MU40691461		intergenic_region
Noncanon	1	55096786	A	G	DOID:3571 / liver cancer/HML3	AB	5892	MU2809683	ACOT11	intron_variant
Noncanon	1	55097287	C	T	DOID:4159 / skin cancer/HML3	AB	5892	MU62735209	ACOT11	intron_variant
Noncanon	1	55097288	G	A	DOID:4159 / skin cancer/HML3	AB	5892	MU60055934	ACOT11	intron_variant
Noncanon	1	55097630	T	G	DOID:4159 / skin cancer/HML3	AB	5892	MU58693283	ACOT11	intron_variant
Noncanon	1	55097852	G	T	DOID:1612 / breast cancer/HML3	AB	5892	MU65140263	ACOT11	intron_variant
Noncanon	1	55098548	C	T	DOID:4159 / skin cancer/HML3	AB	5892	MU48159950	ACOT11	intron_variant
Noncanon	1	55098593	C	A	DOID:4159 / skin cancer/HML3	AB	5892	MU62015835	ACOT11	intron_variant
Noncanon	1	55099027	G	A	DOID:4159 / skin cancer/HML3	AB	5892	MU63185239	ACOT11	intron_variant
Noncanon	1	55099402	G	A	DOID:4159 / skin cancer/HML3	AB	5892	MU50365847	ACOT11	intron_variant
[truncated: 431,410+ more rows]
