# Supplementary material for: Investigation of somatic single nucleotide variations in human endogenous retrovirus elements and their potential association with cancer
Source: PLoS One. 2019 Apr 1;14(4):e0213770. doi: 10.1371/journal.pone.0213770 (PMC6443178; doi:10.1371/journal.pone.0213770)
Supplement: S8 Table — (XLSX) [file pone.0213770.s010.xlsx]

## Sheet: Sheet1
HERV element (rvnr)	Gene (Transcript ID*)	The regions of exon overlap to HERV element
Chromosome position	Exon-Chromosome position
HERV-W/HERV17/LTR17 (4673)	ZNF99 (ENST00000596209.1)	Chr19:22,940,116-22,941,703
Chr19:22,930,627-22,941,703	Exon 4-Chr19:22,940,116-22,942,484
HERV9/LTR12 (6114)	TNN (ENST00000239462.4)	Chr1:175,067,468-175,067,731
Chr1:175,067,095-175,076,543	Exon9- Chr1:175,067,468-175,067,731
MST/MaLR (4780)	KIR2DL1 (ENST00000336077.6)	MST/MaLR (4780) fully covers to Exon 1~4
Chr19:55,290,101-55,273,064	Exon1-Chr19:55,281,263-55,281,336	Chr19:55,281,263-55,281,336
	Exon2-Chr19:55,282,301-55,282,336	Chr19:55,282,301-55,282,336
	Exon3-Chr19:55,284,785-55,285,084	Chr19:55,284,785-55,285,084
	Exon4-Chr19:55,286,617-55,286,910	Chr19:55,286,617-55,286,910
		MST/MaLR (4780) partially covers to Exon5
	Exon5-Chr19:55,290,064-55,290,114	Chr19:55,290,064-55,290,101
HERVIP10F/LTR10F (4062)	OR4K15 (ENST00000305051.5)	Chr14: 20,443,603-20,444,818
Chr14:20,442,186-20,452,832	Exon1-Chr14:20,443,603-20,444,818
* The sources of chromosome position and transcript ID are from ensembl based on genomic reference GRCh 37 (https://www.ensembl.org/)
