# Supplementary material for: Investigation of somatic single nucleotide variations in human endogenous retrovirus elements and their potential association with cancer
Source: PLoS One. 2019 Apr 1;14(4):e0213770. doi: 10.1371/journal.pone.0213770 (PMC6443178; doi:10.1371/journal.pone.0213770)
Supplement: S9 Table — (XLSX) [file pone.0213770.s011.xlsx]

## Sheet: Sheet1
HERV_Sequence	UniPort_AC	Gene_name	Chrmosome	Genome_Pos	Position_N	Ref_N	Var_N	Position_A	Ref_A	Var_A	Polyphen_Pred	DOID /Cancer type /HERV group	Function	HERV_ID	HERV Genus	HERV Supergroup	Accession/ PMID / Sources	Accession/ PMID / Sources	Accession/ PMID / Sources	Accession/ PMID / Sources
NonCanon	Q8NH41	OR4K15	14	20444345	668	T	G	223	I	R	probably damaging	DOID:1324 / lung cancer/HERVIP	-	4062	GE	HERVIPADP	NM_001005486/-/['COSMIC']
NonCanon	Q8NH41	OR4K15	14	20444671	994	C	A	332	P	T	benign	DOID:1324 / lung cancer/HERVIP	Gain|Phosphorylation	4062	GE	HERVIPADP	NM_001005486/22980975/['COSMIC']
NonCanon	Q8NH41	OR4K15	14	20444459	782	G	T	261	R	L	benign	DOID:1324 / lung cancer/HERVIP	Gain|Phosphorylation	4062	GE	HERVIPADP	NM_001005486/-/['IntOGen', 'ICGC', 'TCGA', 'COSMIC']
NonCanon	Q8NH41	OR4K15	14	20443793	116	T	A	39	L	Q	possibly damaging	DOID:1324 / lung cancer/HERVIP	-	4062	GE	HERVIPADP	NM_001005486/-/['IntOGen', 'COSMIC']
NonCanon	Q8NH41	OR4K15	14	20443871	194	G	T	65	G	V	probably damaging	DOID:1324 / lung cancer/HERVIP	Gain|Phosphorylation	4062	GE	HERVIPADP	NM_001005486/-/['COSMIC', 'IntOGen', 'ICGC', 'TCGA']
NonCanon	Q8NH41	OR4K15	14	20444072	395	C	G	132	T	S	benign	DOID:1324 / lung cancer/HERVIP	Gain|Phosphorylation	4062	GE	HERVIPADP	NM_001005486/22941188/['COSMIC']	NM_001005486/-/['IntOGen']
NonCanon	Q8NH41	OR4K15	14	20444044	367	G	T	123	A	S	benign	DOID:1324 / lung cancer/HERVIP	-	4062	GE	HERVIPADP	NM_001005486/22980975/['COSMIC']
NonCanon	Q8NH41	OR4K15	14	20443861	184	A	C	62	I	L	benign	DOID:1324 / lung cancer/HERVIP	Gain|Phosphorylation	4062	GE	HERVIPADP	NM_001005486/-/['COSMIC']
NonCanon	Q8NH41	OR4K15	14	20443786	109	G	T	37	V	L	benign	DOID:1324 / lung cancer/HERVIP	-	4062	GE	HERVIPADP	NM_001005486/22980975/['COSMIC']
NonCanon	Q8NH41	OR4K15	14	20444161	484	C	G	162	R	G	possibly damaging	DOID:1324 / lung cancer/HERVIP	-	4062	GE	HERVIPADP	NM_001005486/23033341/['COSMIC']	NM_001005486/20505728/['COSMIC']
NonCanon	Q8NH41	OR4K15	14	20444013	336	G	C	112	E	D	benign	DOID:1324 / lung cancer/HERVIP	-	4062	GE	HERVIPADP	NM_001005486/22980975/['COSMIC']
NonCanon	Q8NH41	OR4K15	14	20444630	953	T	C	318	V	A	possibly damaging	DOID:1324 / lung cancer/HERVIP	-	4062	GE	HERVIPADP	NM_001005486/-/['COSMIC', 'IntOGen', 'ICGC', 'TCGA']
NonCanon	Q8NH41	OR4K15	14	20444720	1043	A	T	348	K	M	possibly damaging	DOID:1324 / lung cancer/HERVIP	-	4062	GE	HERVIPADP	NM_001005486/-/['IntOGen', 'ICGC', 'COSMIC', 'TCGA']
NonCanon	Q8NH41	OR4K15	14	20444303	626	C	A	209	T	N	probably damaging	DOID:1324 / lung cancer/HERVIP	-	4062	GE	HERVIPADP	NM_001005486/-/['IntOGen', 'ICGC', 'TCGA', 'COSMIC']
NonCanon	Q8NH41	OR4K15	14	20444458	781	C	A	261	R	S	possibly damaging	DOID:1324 / lung cancer/HERVIP	Gain|Phosphorylation	4062	GE	HERVIPADP	NM_001005486/22941189/['COSMIC']	NM_001005486/-/['IntOGen']
NonCanon	Q8NH41	OR4K15	14	20443879	202	C	G	68	L	V	probably damaging	DOID:1324 / lung cancer/HERVIP	-	4062	GE	HERVIPADP	NM_001005486/-/['COSMIC', 'IntOGen', 'ICGC', 'TCGA']
NonCanon	Q8NH41	OR4K15	14	20444603	926	T	C	309	V	A	benign	DOID:1324 / lung cancer/HERVIP	-	4062	GE	HERVIPADP	NM_001005486/22980975/['COSMIC']
NonCanon	Q8NH41	OR4K15	14	20444383	706	C	A	236	L	I	benign	DOID:1324 / lung cancer/HERVIP	-	4062	GE	HERVIPADP	NM_001005486/-/['COSMIC']
NonCanon	Q8NH41	OR4K15	14	20444546	869	C	T	290	S	L	benign	DOID:1324 / lung cancer/HERVIP	-	4062	GE	HERVIPADP	NM_001005486/22980975/['COSMIC']
NonCanon	Q8NH41	OR4K15	14	20443997	320	C	T	107	A	V	benign	DOID:1324 / lung cancer/HERVIP	-	4062	GE	HERVIPADP	NM_001005486/-/['IntOGen']
NonCanon	Q8NH41	OR4K15	14	20444145	468	C	A	156	Y	X	-	DOID:1324 / lung cancer/HERVIP	-	4062	GE	HERVIPADP	NM_001005486/-/['IntOGen', 'ICGC', 'COSMIC', 'TCGA']
NonCanon	Q8NH41	OR4K15	14	20444116	439	T	A	147	Y	N	probably damaging	DOID:1324 / lung cancer/HERVIP	-	4062	GE	HERVIPADP	NM_001005486/-/['IntOGen']
NonCanon	Q8NH41	OR4K15	14	20443810	133	A	T	45	R	W	benign	DOID:1324 / lung cancer/HERVIP	Gain|Phosphorylation	4062	GE	HERVIPADP	NM_001005486/-/['IntOGen']	NM_001005486/22941189/['COSMIC']
NonCanon	Q8NH41	OR4K15	14	20444458	781	C	G	261	R	G	possibly damaging	DOID:1324 / lung cancer/HERVIP	Gain|Phosphorylation	4062	GE	HERVIPADP	NM_001005486/-/['COSMIC']
NonCanon	Q8NH41	OR4K15	14	20443756	79	G	A	27	E	K	benign	DOID:4159 / skin cancer/HERVIP	Loss|+1 from N-linked Glycosylation	4062	GE	HERVIPADP	NM_001005486/22842228/['COSMIC']
NonCanon	Q8NH41	OR4K15	14	20444368	691	T	C	231	S	P	probably damaging	DOID:4159 / skin cancer/HERVIP	-	4062	GE	HERVIPADP	NM_001005486/-/['ICGC', 'TCGA']
NonCanon	Q8NH41	OR4K15	14	20444324	647	C	T	216	T	I	benign	DOID:4159 / skin cancer/HERVIP	-	4062	GE	HERVIPADP	NM_001005486/-/['TCGA']
NonCanon	Q8NH41	OR4K15	14	20444260	583	C	T	195	P	S	probably damaging	DOID:4159 / skin cancer/HERVIP	Gain|Phosphorylation	4062	GE	HERVIPADP	NM_001005486/-/['ICGC', 'TCGA']
NonCanon	Q8NH41	OR4K15	14	20444677	1000	C	T	334	Q	X	-	DOID:4159 / skin cancer/HERVIP	-	4062	GE	HERVIPADP	NM_001005486/-/['ICGC', 'TCGA']
NonCanon	Q8NH41	OR4K15	14	20444294	617	C	T	206	P	L	possibly damaging	DOID:4159 / skin cancer/HERVIP	-	4062	GE	HERVIPADP	NM_001005486/22842228/['COSMIC']
NonCanon	Q8NH41	OR4K15	14	20444293	616	C	T	206	P	S	probably damaging	DOID:4159 / skin cancer/HERVIP	-	4062	GE	HERVIPADP	NM_001005486/-/['ICGC', 'TCGA']
NonCanon	Q8NH41	OR4K15	14	20444192	515	C	T	172	S	L	probably damaging	DOID:4159 / skin cancer/HERVIP	-	4062	GE	HERVIPADP	NM_001005486/-/['ICGC', 'TCGA']
NonCanon	Q8NH41	OR4K15	14	20444612	935	C	A	312	T	K	probably damaging	DOID:4159 / skin cancer/HERVIP	-	4062	GE	HERVIPADP	NM_001005486/22842228/['COSMIC']
NonCanon	Q8NH41	OR4K15	14	20444027	350	C	T	117	S	F	possibly damaging	DOID:4159 / skin cancer/HERVIP	-	4062	GE	HERVIPADP	NM_001005486/-/['TCGA']
NonCanon	Q8NH41	OR4K15	14	20443726	49	G	A	17	E	K	benign	DOID:4159 / skin cancer/HERVIP	-	4062	GE	HERVIPADP	NM_001005486/22842228/['COSMIC']
NonCanon	Q8NH41	OR4K15	14	20444080	403	G	A	135	E	K	probably damaging	DOID:4159 / skin cancer/HERVIP	-	4062	GE	HERVIPADP	NM_001005486/22842228/['COSMIC', 'COSMIC']
NonCanon	Q8NH41	OR4K15	14	20444148	471	G	A	157	M	I	benign	DOID:4159 / skin cancer/HERVIP	Gain|Phosphorylation	4062	GE	HERVIPADP	NM_001005486/-/['ICGC', 'TCGA']
NonCanon	Q8NH41	OR4K15	14	20443711	34	C	T	12	P	S	benign	DOID:4159 / skin cancer/HERVIP	-	4062	GE	HERVIPADP	NM_001005486/-/['TCGA']
NonCanon	Q8NH41	OR4K15	14	20443712	35	C	T	12	P	L	benign	DOID:4159 / skin cancer/HERVIP	-	4062	GE	HERVIPADP	NM_001005486/-/['TCGA']
NonCanon	Q8NH41	OR4K15	14	20443780	103	G	A	35	E	K	benign	DOID:4159 / skin cancer/HERVIP	-	4062	GE	HERVIPADP	NM_001005486/-/['ICGC', 'TCGA']
NonCanon	Q8NH41	OR4K15	14	20444290	613	C	T	205	L	F	probably damaging	DOID:4159 / skin cancer/HERVIP	Gain|Phosphorylation	4062	GE	HERVIPADP	NM_001005486/-/['ICGC', 'TCGA']
NonCanon	Q8NH41	OR4K15	14	20443765	88	C	T	30	H	Y	benign	DOID:4159 / skin cancer/HERVIP	Gain|Phosphorylation	4062	GE	HERVIPADP	NM_001005486/-/['ICGC', 'TCGA']
NonCanon	Q8NH41	OR4K15	14	20444378	701	C	T	234	S	F	benign	DOID:4159 / skin cancer/HERVIP	-	4062	GE	HERVIPADP	NM_001005486/22842228/['COSMIC']	NM_001005486/-/['ICGC', 'TCGA']
NonCanon	Q8NH41	OR4K15	14	20443688	11	C	A	4	S	X	-	DOID:219 / colon cancer/HERVIP	-	4062	GE	HERVIPADP	NM_001005486/-/['COSMIC', 'ICGC', 'TCGA']
NonCanon	Q8NH41	OR4K15	14	20444383	706	C	A	236	L	I	benign	DOID:219 / colon cancer/HERVIP	-	4062	GE	HERVIPADP	NM_001005486/-/['IntOGen']
NonCanon	Q8NH41	OR4K15	14	20443718	41	A	G	14	Q	R	possibly damaging	DOID:219 / colon cancer/HERVIP	Gain|Phosphorylation	4062	GE	HERVIPADP	NM_001005486/-/['ICGC', 'TCGA']
NonCanon	Q8NH41	OR4K15	14	20444053	376	T	C	126	F	L	probably damaging	DOID:219 / colon cancer/HERVIP	-	4062	GE	HERVIPADP	NM_001005486/-/['COSMIC']
NonCanon	Q8NH41	OR4K15	14	20444054	377	T	C	126	F	S	probably damaging	DOID:219 / colon cancer/HERVIP	Gain|Phosphorylation	4062	GE	HERVIPADP	NM_001005486/-/['COSMIC']
NonCanon	Q8NH41	OR4K15	14	20444026	349	T	G	117	S	A	probably damaging	DOID:219 / colon cancer/HERVIP	-	4062	GE	HERVIPADP	NM_001005486/-/['COSMIC', 'ICGC', 'TCGA']
NonCanon	Q8NH41	OR4K15	14	20444015	338	G	A	113	R	H	benign	DOID:219 / colon cancer/HERVIP	-	4062	GE	HERVIPADP	NM_001005486/-/['COSMIC']
NonCanon	Q8NH41	OR4K15	14	20444588	911	T	C	304	L	P	benign	DOID:219 / colon cancer/HERVIP	Gain|Phosphorylation	4062	GE	HERVIPADP	NM_001005486/-/['COSMIC', 'ICGC', 'TCGA']
NonCanon	Q8NH41	OR4K15	14	20444099	422	C	T	141	S	F	benign	DOID:219 / colon cancer/HERVIP	-	4062	GE	HERVIPADP	NM_001005486/22810696/['COSMIC']
NonCanon	Q8NH41	OR4K15	14	20444459	782	G	A	261	R	H	probably damaging	DOID:219 / colon cancer/HERVIP	Gain|Phosphorylation	4062	GE	HERVIPADP	NM_001005486/22895193/['COSMIC']
NonCanon	Q8NH41	OR4K15	14	20444089	412	C	T	138	L	F	benign	DOID:219 / colon cancer/HERVIP	-	4062	GE	HERVIPADP	NM_001005486/22810696/['COSMIC']
NonCanon	Q8NH41	OR4K15	14	20443943	266	A	G	89	N	S	probably damaging	DOID:219 / colon cancer/HERVIP	-	4062	GE	HERVIPADP	NM_001005486/-/['COSMIC', 'ICGC', 'TCGA']
NonCanon	Q8NH41	OR4K15	14	20444607	930	C	G	310	I	M	probably damaging	DOID:219 / colon cancer/HERVIP	Gain|Phosphorylation	4062	GE	HERVIPADP	NM_001005486/-/['COSMIC', 'ICGC', 'TCGA']
NonCanon	Q8NH41	OR4K15	14	20444012	335	A	T	112	E	V	possibly damaging	DOID:219 / colon cancer/HERVIP	-	4062	GE	HERVIPADP	NM_001005486/-/['COSMIC', 'ICGC', 'TCGA']
NonCanon	Q8NH41	OR4K15	14	20444560	883	C	G	295	L	V	possibly damaging	DOID:10534 / stomach cancer/HERVIP	-	4062	GE	HERVIPADP	NM_001005486/-/['ICGC', 'TCGA']
NonCanon	Q8NH41	OR4K15	14	20444431	754	C	T	252	R	C	probably damaging	DOID:10534 / stomach cancer/HERVIP	Gain|Phosphorylation	4062	GE	HERVIPADP	NM_001005486/-/['ICGC', 'TCGA']
NonCanon	Q8NH41	OR4K15	14	20444468	791	T	C	264	L	S	probably damaging	DOID:10534 / stomach cancer/HERVIP	Gain|Phosphorylation	4062	GE	HERVIPADP	NM_001005486/-/['COSMIC', 'ICGC']
NonCanon	Q8NH41	OR4K15	14	20444458	781	C	T	261	R	C	benign	DOID:10534 / stomach cancer/HERVIP	Gain|Phosphorylation	4062	GE	HERVIPADP	NM_001005486/-/['ICGC', 'TCGA']
NonCanon	Q8NH41	OR4K15	14	20444306	629	A	C	210	K	T	benign	DOID:10534 / stomach cancer/HERVIP	-	4062	GE	HERVIPADP	NM_001005486/-/['ICGC', 'TCGA']
NonCanon	Q8NH41	OR4K15	14	20443925	248	T	G	83	M	R	probably damaging	DOID:10534 / stomach cancer/HERVIP	Gain|Phosphorylation	4062	GE	HERVIPADP	NM_001005486/-/['ICGC', 'TCGA']
NonCanon	Q8NH41	OR4K15	14	20444481	804	C	G	268	I	M	probably damaging	DOID:10534 / stomach cancer/HERVIP	-	4062	GE	HERVIPADP	NM_001005486/22037554/['COSMIC']	NM_001005486/-/['IntOGen']
NonCanon	Q8NH41	OR4K15	14	20444053	376	T	A	126	F	I	probably damaging	DOID:10534 / stomach cancer/HERVIP	-	4062	GE	HERVIPADP	NM_001005486/-/['ICGC', 'TCGA']
NonCanon	Q8NH41	OR4K15	14	20443718	41	A	C	14	Q	P	probably damaging	DOID:10534 / stomach cancer/HERVIP	-	4062	GE	HERVIPADP	NM_001005486/-/['ICGC', 'TCGA']
NonCanon	Q8NH41	OR4K15	14	20444186	509	T	C	170	L	P	possibly damaging	DOID:11934 / head and neck cancer/HERVIP	-	4062	GE	HERVIPADP	NM_001005486/-/['TCGA']
NonCanon	Q8NH41	OR4K15	14	20444538	861	C	A	287	S	R	benign	DOID:11934 / head and neck cancer/HERVIP	Gain|Phosphorylation	4062	GE	HERVIPADP	NM_001005486/-/['TCGA']
NonCanon	Q8NH41	OR4K15	14	20444539	862	A	G	288	S	G	benign	DOID:11934 / head and neck cancer/HERVIP	-	4062	GE	HERVIPADP	NM_001005486/-/['TCGA']
NonCanon	Q8NH41	OR4K15	14	20444383	706	C	T	236	L	F	benign	DOID:11934 / head and neck cancer/HERVIP	-	4062	GE	HERVIPADP	NM_001005486/-/['TCGA']
NonCanon	Q8NH41	OR4K15	14	20443780	103	G	A	35	E	K	benign	DOID:11934 / head and neck cancer/HERVIP	-	4062	GE	HERVIPADP	NM_001005486/-/['TCGA']
NonCanon	Q8NH41	OR4K15	14	20444015	338	G	A	113	R	H	benign	DOID:11934 / head and neck cancer/HERVIP	-	4062	GE	HERVIPADP	NM_001005486/-/['TCGA']
NonCanon	Q8NH41	OR4K15	14	20443795	118	G	A	40	G	R	probably damaging	DOID:11934 / head and neck cancer/HERVIP	Gain|Phosphorylation	4062	GE	HERVIPADP	NM_001005486/-/['TCGA']
NonCanon	Q8NH41	OR4K15	14	20443692	15	A	C	5	L	F	benign	DOID:11934 / head and neck cancer/HERVIP	-	4062	GE	HERVIPADP	NM_001005486/-/['TCGA']
NonCanon	Q8NH41	OR4K15	14	20444245	568	C	G	190	L	V	probably damaging	DOID:11934 / head and neck cancer/HERVIP	-	4062	GE	HERVIPADP	NM_001005486/-/['TCGA']
NonCanon	Q8NH41	OR4K15	14	20444332	655	G	A	219	V	I	benign	DOID:363 / uterine cancer/HERVIP	-	4062	GE	HERVIPADP	NM_001005486/-/['COSMIC', 'TCGA']
NonCanon	Q8NH41	OR4K15	14	20444672	995	C	A	332	P	H	possibly damaging	DOID:363 / uterine cancer/HERVIP	Gain|Phosphorylation	4062	GE	HERVIPADP	NM_001005486/-/['COSMIC', 'IntOGen', 'TCGA']
NonCanon	Q8NH41	OR4K15	14	20443771	94	C	T	32	R	W	benign	DOID:363 / uterine cancer/HERVIP	-	4062	GE	HERVIPADP	NM_001005486/-/['COSMIC', 'TCGA']
NonCanon	Q8NH41	OR4K15	14	20444639	962	C	T	321	A	V	possibly damaging	DOID:363 / uterine cancer/HERVIP	Gain|Phosphorylation	4062	GE	HERVIPADP	NM_001005486/-/['COSMIC', 'TCGA']
NonCanon	Q8NH41	OR4K15	14	20444410	733	A	G	245	I	V	benign	DOID:363 / uterine cancer/HERVIP	-	4062	GE	HERVIPADP	NM_001005486/-/['COSMIC', 'IntOGen', 'TCGA']
NonCanon	Q8NH41	OR4K15	14	20443918	241	A	G	81	T	A	benign	DOID:363 / uterine cancer/HERVIP	-	4062	GE	HERVIPADP	NM_001005486/-/['TCGA', 'COSMIC']
NonCanon	Q8NH41	OR4K15	14	20444383	706	C	A	236	L	I	benign	DOID:363 / uterine cancer/HERVIP	-	4062	GE	HERVIPADP	NM_001005486/-/['COSMIC', 'TCGA']
NonCanon	Q8NH41	OR4K15	14	20444323	646	A	T	216	T	S	benign	DOID:363 / uterine cancer/HERVIP	-	4062	GE	HERVIPADP	NM_001005486/-/['COSMIC', 'IntOGen', 'TCGA']
NonCanon	Q8NH41	OR4K15	14	20444441	764	C	A	255	A	E	benign	DOID:4362 / cervical cancer/HERVIP	Gain|Glycosylation	4062	GE	HERVIPADP	NM_001005486/-/['TCGA']
NonCanon	Q8NH41	OR4K15	14	20444607	930	C	G	310	I	M	probably damaging	DOID:4362 / cervical cancer/HERVIP	Gain|Phosphorylation	4062	GE	HERVIPADP	NM_001005486/-/['TCGA']
NonCanon	Q8NH41	OR4K15	14	20444114	437	G	A	146	R	H	possibly damaging	DOID:4362 / cervical cancer/HERVIP	-	4062	GE	HERVIPADP	NM_001005486/-/['TCGA']
NonCanon	Q8NH41	OR4K15	14	20444015	338	G	A	113	R	H	benign	DOID:0060119 / pharynx cancer/HERVIP	-	4062	GE	HERVIPADP	NM_001005486/-/['IntOGen']
NonCanon	Q8NH41	OR4K15	14	20443692	15	A	C	5	L	F	benign	DOID:0060119 / pharynx cancer/HERVIP	-	4062	GE	HERVIPADP	NM_001005486/-/['IntOGen']
NonCanon	Q8NH41	OR4K15	14	20443780	103	G	A	35	E	K	benign	DOID:0060119 / pharynx cancer/HERVIP	-	4062	GE	HERVIPADP	NM_001005486/-/['IntOGen']
NonCanon	Q8NH41	OR4K15	14	20444245	568	C	G	190	L	V	probably damaging	DOID:0060119 / pharynx cancer/HERVIP	-	4062	GE	HERVIPADP	NM_001005486/-/['IntOGen']
NonCanon	Q8NH41	OR4K15	14	20444186	509	T	C	170	L	P	possibly damaging	DOID:0060119 / pharynx cancer/HERVIP	-	4062	GE	HERVIPADP	NM_001005486/-/['IntOGen']
NonCanon	Q8NH41	OR4K15	14	20443973	296	C	A	99	S	Y	possibly damaging	DOID:1612 / breast cancer/HERVIP	-	4062	GE	HERVIPADP	NM_001005486/-/['ICGC', 'COSMIC', 'TCGA']
NonCanon	Q8NH41	OR4K15	14	20444111	434	A	T	145	D	V	probably damaging	DOID:1612 / breast cancer/HERVIP	-	4062	GE	HERVIPADP	NM_001005486/-/['COSMIC', 'IntOGen', 'ICGC', 'TCGA']
NonCanon	Q8NH41	OR4K15	14	20443846	169	C	A	57	L	I	benign	DOID:1612 / breast cancer/HERVIP	-	4062	GE	HERVIPADP	NM_001005486/-/['IntOGen', 'ICGC', 'COSMIC', 'TCGA']
NonCanon	Q8NH41	OR4K15	14	20444383	706	C	A	236	L	I	benign	DOID:1521 / cecum cancer/HERVIP	-	4062	GE	HERVIPADP	NM_001005486/-/['COSMIC']
NonCanon	Q8NH41	OR4K15	14	20444584	907	A	G	303	T	A	probably damaging	DOID:1521 / cecum cancer/HERVIP	-	4062	GE	HERVIPADP	NM_001005486/-/['COSMIC']
NonCanon	Q8NH41	OR4K15	14	20443718	41	A	G	14	Q	R	possibly damaging	DOID:1521 / cecum cancer/HERVIP	Gain|Phosphorylation	4062	GE	HERVIPADP	NM_001005486/-/['COSMIC']
NonCanon	Q8NH41	OR4K15	14	20444555	878	A	T	293	K	I	probably damaging	DOID:3571 / liver cancer/HERVIP	-	4062	GE	HERVIPADP	NM_001005486/-/['COSMIC', 'ICGC']
NonCanon	Q8NH41	OR4K15	14	20444168	491	T	C	164	V	A	benign	DOID:3571 / liver cancer/HERVIP	-	4062	GE	HERVIPADP	NM_001005486/-/['COSMIC', 'ICGC']
NonCanon	Q8NH41	OR4K15	14	20444695	1018	A	G	340	R	G	benign	DOID:5041 / esophageal cancer/HERVIP	-	4062	GE	HERVIPADP	NM_001005486/23525077/['COSMIC']
NonCanon	Q8NH41	OR4K15	14	20443715	38	T	C	13	I	T	benign	DOID:5041 / esophageal cancer/HERVIP	-	4062	GE	HERVIPADP	NM_001005486/23525077/['COSMIC']
NonCanon	Q8NH41	OR4K15	14	20443748	71	C	T	24	S	L	possibly damaging	DOID:10283 / prostate cancer/HERVIP	-	4062	GE	HERVIPADP	NM_001005486/22610119/['COSMIC']
NonCanon	Q8NH41	OR4K15	14	20444014	337	C	T	113	R	C	benign	DOID:10283 / prostate cancer/HERVIP	-	4062	GE	HERVIPADP	NM_001005486/-/['ICGC', 'TCGA', 'COSMIC']
NonCanon	Q8NH41	OR4K15	14	20444261	584	C	A	195	P	H	probably damaging	DOID:1993 / rectum cancer/HERVIP	-	4062	GE	HERVIPADP	NM_001005486/22810696/['COSMIC']
NonCanon	Q8NH41	OR4K15	14	20444176	499	G	T	167	V	L	benign	DOID:263 / kidney cancer/HERVIP	-	4062	GE	HERVIPADP	NM_001005486/23797736/['COSMIC']
NonCanon	Q8NH41	OR4K15	14	20444219	542	C	T	181	T	I	benign	DOID:263 / kidney cancer/HERVIP	-	4062	GE	HERVIPADP	NM_001005486/-/['COSMIC', 'IntOGen', 'ICGC', 'TCGA']
NonCanon	Q8NH41	OR4K15	14	20444063	386	A	G	129	H	R	probably damaging	DOID:263 / kidney cancer/HERVIP	-	4062	GE	HERVIPADP	NM_001005486/-/['COSMIC']
NonCanon	Q8NH41	OR4K15	14	20444039	362	G	C	121	C	S	probably damaging	DOID:2531 / hematologic cancer/HERVIP	-	4062	GE	HERVIPADP	NM_001005486/-/['ICGC']
NonCanon	Q8NH41	OR4K15	14	20443698	21	T	A	7	D	E	benign	DOID:2531 / hematologic cancer/HERVIP	-	4062	GE	HERVIPADP	NM_001005486/24325359/['COSMIC']
NonCanon	Q8NH41	OR4K15	14	20444477	800	A	G	267	H	R	probably damaging	DOID:2531 / hematologic cancer/HERVIP	Gain|Phosphorylation	4062	GE	HERVIPADP	NM_001005486/-/['ICGC', 'COSMIC']
NonCanon	Q8NH41	OR4K15	14	20444054	377	T	A	126	F	Y	probably damaging	DOID:2394 / ovarian cancer/HERVIP	-	4062	GE	HERVIPADP	NM_001005486/21720365/['COSMIC']	NM_001005486/-/['IntOGen']
NonCanon	Q8NH41	OR4K15	14	20444625	948	A	T	316	K	N	possibly damaging	DOID:2394 / ovarian cancer/HERVIP	Gain|Phosphorylation	4062	GE	HERVIPADP	NM_001005486/-/['COSMIC', 'ICGC']
NonCanon	Q8NH41	OR4K15	14	20444378	701	C	T	234	S	F	benign	DOID:1319 / brain cancer/HERVIP	-	4062	GE	HERVIPADP	NM_001005486/-/['ICGC', 'TCGA']
NonCanon	Q8NH41	OR4K15	14	20443680	3	G	T	1	M	I	benign	DOID:3953 / adrenal gland cancer/HERVIP	-	4062	GE	HERVIPADP	NM_001005486/-/['TCGA']
NonCanon	Q8NH41	OR4K15	14	20444355	678	T	A	226	D	E	benign	DOID:3953 / adrenal gland cancer/HERVIP	-	4062	GE	HERVIPADP	NM_001005486/-/['TCGA']
NonCanon	Q8NH41	OR4K15	14	20444551	874	G	T	292	D	Y	probably damaging	DOID:1793 / pancreatic cancer/HERVIP	-	4062	GE	HERVIPADP	NM_001005486/-/['TCGA']
NonCanon	A8MXY4	ZNF99	19	22941052	1659	G	A	553	M	I	benign	DOID:4159 / skin cancer/HERVW	Gain|Glycosylation	4673	GE	HERVW9	NM_001080409/-/['ICGC', 'TCGA']
NonCanon	A8MXY4	ZNF99	19	22941272	1439	C	T	480	P	L	benign	DOID:4159 / skin cancer/HERVW	-	4673	GE	HERVW9	NM_001080409/22622578/['COSMIC']
NonCanon	A8MXY4	ZNF99	19	22941365	1346	G	A	449	G	E	possibly damaging	DOID:4159 / skin cancer/HERVW	Gain|Phosphorylation	4673	GE	HERVW9	NM_001080409/-/['ICGC', 'TCGA']
NonCanon	A8MXY4	ZNF99	19	22940373	2338	A	G	780	K	E	probably damaging	DOID:4159 / skin cancer/HERVW	-	4673	GE	HERVW9	NM_001080409/-/['ICGC', 'TCGA']
NonCanon	A8MXY4	ZNF99	19	22940904	1807	A	G	603	N	D	benign	DOID:4159 / skin cancer/HERVW	Gain|Phosphorylation	4673	GE	HERVW9	NM_001080409/-/['TCGA']
NonCanon	A8MXY4	ZNF99	19	22940309	2402	C	T	801	S	F	benign	DOID:4159 / skin cancer/HERVW	-	4673	GE	HERVW9	NM_001080409/-/['ICGC', 'TCGA']
NonCanon	A8MXY4	ZNF99	19	22941681	1030	G	A	344	E	K	probably damaging	DOID:4159 / skin cancer/HERVW	Gain|Phosphorylation	4673	GE	HERVW9	NM_001080409/-/['ICGC', 'TCGA']
NonCanon	A8MXY4	ZNF99	19	22941105	1606	C	T	536	P	S	probably damaging	DOID:4159 / skin cancer/HERVW	-	4673	GE	HERVW9	NM_001080409/-/['ICGC', 'TCGA']
NonCanon	A8MXY4	ZNF99	19	22940841	1870	G	A	624	E	K	possibly damaging	DOID:4159 / skin cancer/HERVW	Gain|Phosphorylation	4673	GE	HERVW9	NM_001080409/-/['ICGC', 'TCGA']
NonCanon	A8MXY4	ZNF99	19	22941304	1407	A	C	469	R	S	benign	DOID:4159 / skin cancer/HERVW	Gain|Glycosylation	4673	GE	HERVW9	NM_001080409/-/['ICGC', 'TCGA']
NonCanon	A8MXY4	ZNF99	19	22941146	1565	C	T	522	S	L	possibly damaging	DOID:4159 / skin cancer/HERVW	-	4673	GE	HERVW9	NM_001080409/-/['ICGC', 'TCGA']
NonCanon	A8MXY4	ZNF99	19	22940885	1826	G	A	609	R	K	benign	DOID:4159 / skin cancer/HERVW	-	4673	GE	HERVW9	NM_001080409/-/['TCGA']
NonCanon	A8MXY4	ZNF99	19	22940264	2447	C	T	816	S	F	benign	DOID:4159 / skin cancer/HERVW	-	4673	GE	HERVW9	NM_001080409/-/['ICGC', 'TCGA']
NonCanon	A8MXY4	ZNF99	19	22941701	1010	G	A	337	G	E	benign	DOID:4159 / skin cancer/HERVW	Gain|Phosphorylation	4673	GE	HERVW9	NM_001080409/-/['ICGC', 'TCGA']
NonCanon	A8MXY4	ZNF99	19	22941440	1271	C	T	424	P	L	probably damaging	DOID:4159 / skin cancer/HERVW	-	4673	GE	HERVW9	NM_001080409/-/['ICGC', 'TCGA']
NonCanon	A8MXY4	ZNF99	19	22940978	1733	C	T	578	S	L	probably damaging	DOID:4159 / skin cancer/HERVW	-	4673	GE	HERVW9	NM_001080409/-/['ICGC', 'TCGA']
NonCanon	A8MXY4	ZNF99	19	22940685	2026	C	T	676	P	S	possibly damaging	DOID:4159 / skin cancer/HERVW	Gain|Phosphorylation	4673	GE	HERVW9	NM_001080409/-/['TCGA']
NonCanon	A8MXY4	ZNF99	19	22941645	1066	C	T	356	L	F	probably damaging	DOID:4159 / skin cancer/HERVW	Gain|Phosphorylation	4673	GE	HERVW9	NM_001080409/-/['ICGC', 'TCGA']
NonCanon	A8MXY4	ZNF99	19	22941624	1087	C	T	363	H	Y	possibly damaging	DOID:4159 / skin cancer/HERVW	Gain|Phosphorylation	4673	GE	HERVW9	NM_001080409/-/['TCGA']
NonCanon	A8MXY4	ZNF99	19	22940294	2417	A	T	806	K	I	benign	DOID:4159 / skin cancer/HERVW	Gain|Phosphorylation	4673	GE	HERVW9	NM_001080409/-/['ICGC', 'TCGA']
NonCanon	A8MXY4	ZNF99	19	22941198	1513	G	A	505	E	K	benign	DOID:4159 / skin cancer/HERVW	-	4673	GE	HERVW9	NM_001080409/-/['ICGC', 'TCGA']
NonCanon	A8MXY4	ZNF99	19	22940600	2111	C	A	704	P	H	probably damaging	DOID:4159 / skin cancer/HERVW	-	4673	GE	HERVW9	NM_001080409/-/['ICGC', 'TCGA']
NonCanon	A8MXY4	ZNF99	19	22941345	1366	G	A	456	E	K	benign	DOID:4159 / skin cancer/HERVW	-	4673	GE	HERVW9	NM_001080409/-/['ICGC', 'TCGA']
NonCanon	A8MXY4	ZNF99	19	22940838	1873	G	A	625	E	K	possibly damaging	DOID:4159 / skin cancer/HERVW	-	4673	GE	HERVW9	NM_001080409/-/['ICGC', 'TCGA']
NonCanon	A8MXY4	ZNF99	19	22941120	1591	C	T	531	H	Y	probably damaging	DOID:4159 / skin cancer/HERVW	-	4673	GE	HERVW9	NM_001080409/-/['ICGC', 'TCGA']
NonCanon	A8MXY4	ZNF99	19	22940573	2138	C	T	713	A	V	probably damaging	DOID:4159 / skin cancer/HERVW	Gain|Phosphorylation	4673	GE	HERVW9	NM_001080409/-/['ICGC', 'TCGA']
NonCanon	A8MXY4	ZNF99	19	22940754	1957	G	A	653	E	K	possibly damaging	DOID:4159 / skin cancer/HERVW	-	4673	GE	HERVW9	NM_001080409/-/['ICGC', 'TCGA']
NonCanon	A8MXY4	ZNF99	19	22940784	1927	C	T	643	H	Y	possibly damaging	DOID:4159 / skin cancer/HERVW	-	4673	GE	HERVW9	NM_001080409/-/['ICGC', 'TCGA']
NonCanon	A8MXY4	ZNF99	19	22941065	1646	C	T	549	S	F	benign	DOID:4159 / skin cancer/HERVW	-	4673	GE	HERVW9	NM_001080409/-/['ICGC', 'TCGA']
NonCanon	A8MXY4	ZNF99	19	22941060	1651	A	G	551	T	A	benign	DOID:4159 / skin cancer/HERVW	-	4673	GE	HERVW9	NM_001080409/-/['ICGC', 'TCGA']
NonCanon	A8MXY4	ZNF99	19	22941413	1298	C	T	433	A	V	possibly damaging	DOID:4159 / skin cancer/HERVW	Gain|Phosphorylation	4673	GE	HERVW9	NM_001080409/-/['ICGC', 'TCGA']
NonCanon	A8MXY4	ZNF99	19	22941084	1627	G	A	543	G	S	possibly damaging	DOID:4159 / skin cancer/HERVW	Gain|Phosphorylation	4673	GE	HERVW9	NM_001080409/-/['ICGC', 'TCGA']
NonCanon	A8MXY4	ZNF99	19	22940775	1936	G	A	646	E	K	benign	DOID:4159 / skin cancer/HERVW	Gain|Phosphorylation	4673	GE	HERVW9	NM_001080409/-/['ICGC', 'TCGA']
NonCanon	A8MXY4	ZNF99	19	22941261	1450	G	A	484	E	K	possibly damaging	DOID:4159 / skin cancer/HERVW	Gain|Phosphorylation	4673	GE	HERVW9	NM_001080409/-/['ICGC', 'TCGA']
NonCanon	A8MXY4	ZNF99	19	22940616	2095	C	T	699	H	Y	probably damaging	DOID:4159 / skin cancer/HERVW	Gain|Phosphorylation	4673	GE	HERVW9	NM_001080409/-/['ICGC', 'TCGA']
NonCanon	A8MXY4	ZNF99	19	22941130	1581	T	A	527	H	Q	probably damaging	DOID:4159 / skin cancer/HERVW	-	4673	GE	HERVW9	NM_001080409/-/['ICGC', 'TCGA']
NonCanon	A8MXY4	ZNF99	19	22940868	1843	C	T	615	H	Y	probably damaging	DOID:4159 / skin cancer/HERVW	Gain|Phosphorylation	4673	GE	HERVW9	NM_001080409/-/['ICGC', 'TCGA']
NonCanon	A8MXY4	ZNF99	19	22941513	1198	G	A	400	E	K	possibly damaging	DOID:4159 / skin cancer/HERVW	Gain|Phosphorylation	4673	GE	HERVW9	NM_001080409/-/['ICGC', 'TCGA']
NonCanon	A8MXY4	ZNF99	19	22940532	2179	C	T	727	H	Y	probably damaging	DOID:4159 / skin cancer/HERVW	-	4673	GE	HERVW9	NM_001080409/-/['ICGC', 'TCGA']
NonCanon	A8MXY4	ZNF99	19	22941498	1213	G	A	405	A	T	possibly damaging	DOID:4159 / skin cancer/HERVW	Gain|Phosphorylation	4673	GE	HERVW9	NM_001080409/-/['ICGC', 'TCGA']
NonCanon	A8MXY4	ZNF99	19	22940864	1847	C	G	616	T	S	possibly damaging	DOID:4159 / skin cancer/HERVW	-	4673	GE	HERVW9	NM_001080409/22622578/['COSMIC']
NonCanon	A8MXY4	ZNF99	19	22941195	1516	G	A	506	E	K	possibly damaging	DOID:4159 / skin cancer/HERVW	-	4673	GE	HERVW9	NM_001080409/-/['ICGC', 'TCGA']
NonCanon	A8MXY4	ZNF99	19	22940339	2372	G	T	791	C	F	probably damaging	DOID:1324 / lung cancer/HERVW	-	4673	GE	HERVW9	NM_001080409/-/['COSMIC', 'IntOGen']
NonCanon	A8MXY4	ZNF99	19	22941184	1527	C	A	509	C	X	-	DOID:1324 / lung cancer/HERVW	-	4673	GE	HERVW9	NM_001080409/22980975/['COSMIC']
NonCanon	A8MXY4	ZNF99	19	22940448	2263	C	G	755	H	D	probably damaging	DOID:1324 / lung cancer/HERVW	-	4673	GE	HERVW9	NM_001080409/-/['COSMIC', 'IntOGen']
NonCanon	A8MXY4	ZNF99	19	22940826	1885	G	T	629	A	S	probably damaging	DOID:1324 / lung cancer/HERVW	Gain|Phosphorylation	4673	GE	HERVW9	NM_001080409/-/['IntOGen']
NonCanon	A8MXY4	ZNF99	19	22941130	1581	T	A	527	H	Q	probably damaging	DOID:1324 / lung cancer/HERVW	-	4673	GE	HERVW9	NM_001080409/-/['COSMIC', 'IntOGen', 'ICGC', 'TCGA']
NonCanon	A8MXY4	ZNF99	19	22941177	1534	G	C	512	E	Q	possibly damaging	DOID:1324 / lung cancer/HERVW	-	4673	GE	HERVW9	NM_001080409/-/['COSMIC', 'IntOGen', 'ICGC', 'TCGA']
NonCanon	A8MXY4	ZNF99	19	22941360	1351	C	T	451	Q	X	-	DOID:1324 / lung cancer/HERVW	-	4673	GE	HERVW9	NM_001080409/-/['COSMIC']
NonCanon	A8MXY4	ZNF99	19	22940385	2326	C	T	776	L	F	probably damaging	DOID:1324 / lung cancer/HERVW	-	4673	GE	HERVW9	NM_001080409/-/['COSMIC']
NonCanon	A8MXY4	ZNF99	19	22941000	1711	G	T	571	G	C	probably damaging	DOID:1324 / lung cancer/HERVW	-	4673	GE	HERVW9	NM_001080409/-/['COSMIC', 'ICGC']
NonCanon	A8MXY4	ZNF99	19	22941219	1492	G	T	498	V	L	benign	DOID:1324 / lung cancer/HERVW	-	4673	GE	HERVW9	NM_001080409/-/['COSMIC', 'ICGC']
NonCanon	A8MXY4	ZNF99	19	22940341	2370	A	T	790	K	N	probably damaging	DOID:1324 / lung cancer/HERVW	-	4673	GE	HERVW9	NM_001080409/22980975/['COSMIC']
NonCanon	A8MXY4	ZNF99	19	22940791	1920	G	T	640	E	D	benign	DOID:1324 / lung cancer/HERVW	Gain|Phosphorylation	4673	GE	HERVW9	NM_001080409/22980975/['COSMIC']
NonCanon	A8MXY4	ZNF99	19	22940945	1766	G	C	589	G	A	possibly damaging	DOID:1324 / lung cancer/HERVW	Gain|Phosphorylation	4673	GE	HERVW9	NM_001080409/-/['COSMIC']
NonCanon	A8MXY4	ZNF99	19	22941436	1275	C	G	425	C	W	possibly damaging	DOID:1324 / lung cancer/HERVW	-	4673	GE	HERVW9	NM_001080409/-/['COSMIC', 'IntOGen', 'ICGC', 'TCGA']
NonCanon	A8MXY4	ZNF99	19	22940650	2061	C	A	687	N	K	benign	DOID:1324 / lung cancer/HERVW	Gain|Phosphorylation	4673	GE	HERVW9	NM_001080409/-/['COSMIC', 'ICGC']
NonCanon	A8MXY4	ZNF99	19	22941030	1681	G	T	561	G	W	probably damaging	DOID:1324 / lung cancer/HERVW	-	4673	GE	HERVW9	NM_001080409/22980975/['COSMIC']
NonCanon	A8MXY4	ZNF99	19	22941111	1600	A	G	534	K	E	benign	DOID:1324 / lung cancer/HERVW	-	4673	GE	HERVW9	NM_001080409/22980975/['COSMIC']
NonCanon	A8MXY4	ZNF99	19	22940877	1834	C	A	612	Q	K	benign	DOID:1324 / lung cancer/HERVW	-	4673	GE	HERVW9	NM_001080409/-/['COSMIC', 'IntOGen', 'ICGC', 'TCGA']
NonCanon	A8MXY4	ZNF99	19	22941185	1526	G	T	509	C	F	benign	DOID:1324 / lung cancer/HERVW	-	4673	GE	HERVW9	NM_001080409/-/['IntOGen']
NonCanon	A8MXY4	ZNF99	19	22941338	1373	G	A	458	C	Y	probably damaging	DOID:1324 / lung cancer/HERVW	Gain|Phosphorylation	4673	GE	HERVW9	NM_001080409/-/['COSMIC', 'IntOGen', 'ICGC', 'TCGA']
NonCanon	A8MXY4	ZNF99	19	22940721	1990	C	A	664	L	I	probably damaging	DOID:1324 / lung cancer/HERVW	Gain|Phosphorylation	4673	GE	HERVW9	NM_001080409/-/['COSMIC', 'IntOGen', 'ICGC', 'TCGA']
NonCanon	A8MXY4	ZNF99	19	22940301	2410	C	T	804	L	F	probably damaging	DOID:1324 / lung cancer/HERVW	Gain|Glycosylation	4673	GE	HERVW9	NM_001080409/-/['COSMIC', 'IntOGen']
NonCanon	A8MXY4	ZNF99	19	22941575	1136	G	C	379	S	T	benign	DOID:1324 / lung cancer/HERVW	-	4673	GE	HERVW9	NM_001080409/-/['COSMIC', 'IntOGen']
NonCanon	A8MXY4	ZNF99	19	22941422	1289	G	A	430	C	Y	probably damaging	DOID:1324 / lung cancer/HERVW	Gain|Phosphorylation	4673	GE	HERVW9	NM_001080409/-/['COSMIC']
NonCanon	A8MXY4	ZNF99	19	22940689	2022	G	C	674	E	D	benign	DOID:1324 / lung cancer/HERVW	-	4673	GE	HERVW9	NM_001080409/-/['COSMIC', 'IntOGen']
NonCanon	A8MXY4	ZNF99	19	22941497	1214	C	A	405	A	D	possibly damaging	DOID:1324 / lung cancer/HERVW	-	4673	GE	HERVW9	NM_001080409/22980975/['COSMIC']
NonCanon	A8MXY4	ZNF99	19	22941577	1134	T	A	378	F	L	probably damaging	DOID:1324 / lung cancer/HERVW	-	4673	GE	HERVW9	NM_001080409/22980975/['COSMIC']
NonCanon	A8MXY4	ZNF99	19	22941534	1177	G	A	393	G	R	probably damaging	DOID:1324 / lung cancer/HERVW	-	4673	GE	HERVW9	NM_001080409/22980975/['COSMIC']
NonCanon	A8MXY4	ZNF99	19	22941623	1088	A	T	363	H	L	probably damaging	DOID:1324 / lung cancer/HERVW	-	4673	GE	HERVW9	NM_001080409/-/['COSMIC', 'ICGC']
NonCanon	A8MXY4	ZNF99	19	22940130	2581	G	C	861	E	Q	benign	DOID:1324 / lung cancer/HERVW	-	4673	GE	HERVW9	NM_001080409/-/['IntOGen']
NonCanon	A8MXY4	ZNF99	19	22940429	2282	G	C	761	C	S	benign	DOID:1324 / lung cancer/HERVW	-	4673	GE	HERVW9	NM_001080409/-/['IntOGen', 'ICGC', 'TCGA', 'COSMIC']
NonCanon	A8MXY4	ZNF99	19	22940442	2269	G	T	757	A	S	possibly damaging	DOID:1324 / lung cancer/HERVW	-	4673	GE	HERVW9	NM_001080409/-/['IntOGen']
NonCanon	A8MXY4	ZNF99	19	22940607	2104	A	G	702	K	E	benign	DOID:1324 / lung cancer/HERVW	-	4673	GE	HERVW9	NM_001080409/22980975/['COSMIC']
NonCanon	A8MXY4	ZNF99	19	22940558	2153	C	G	718	S	X	-	DOID:1324 / lung cancer/HERVW	-	4673	GE	HERVW9	NM_001080409/22980975/['COSMIC']
NonCanon	A8MXY4	ZNF99	19	22940373	2338	A	G	780	K	E	probably damaging	DOID:1324 / lung cancer/HERVW	-	4673	GE	HERVW9	NM_001080409/22980975/['COSMIC']	NM_001080409/-/['IntOGen', 'ICGC', 'TCGA', 'COSMIC']
NonCanon	A8MXY4	ZNF99	19	22940298	2413	A	G	805	R	G	benign	DOID:1324 / lung cancer/HERVW	Gain|Glycosylation	4673	GE	HERVW9	NM_001080409/-/['COSMIC', 'IntOGen', 'ICGC', 'TCGA']
NonCanon	A8MXY4	ZNF99	19	22941528	1183	A	C	395	K	Q	probably damaging	DOID:11934 / head and neck cancer/HERVW	-	4673	GE	HERVW9	NM_001080409/-/['TCGA']
NonCanon	A8MXY4	ZNF99	19	22940600	2111	C	G	704	P	R	probably damaging	DOID:11934 / head and neck cancer/HERVW	-	4673	GE	HERVW9	NM_001080409/-/['TCGA']
NonCanon	A8MXY4	ZNF99	19	22940817	1894	C	T	632	Q	X	-	DOID:11934 / head and neck cancer/HERVW	-	4673	GE	HERVW9	NM_001080409/-/['TCGA']
NonCanon	A8MXY4	ZNF99	19	22940685	2026	C	T	676	P	S	possibly damaging	DOID:11934 / head and neck cancer/HERVW	Gain|Phosphorylation	4673	GE	HERVW9	NM_001080409/-/['TCGA']
NonCanon	A8MXY4	ZNF99	19	22941431	1280	G	T	427	C	F	possibly damaging	DOID:11934 / head and neck cancer/HERVW	-	4673	GE	HERVW9	NM_001080409/-/['TCGA']
NonCanon	A8MXY4	ZNF99	19	22940586	2125	G	C	709	E	Q	possibly damaging	DOID:11934 / head and neck cancer/HERVW	-	4673	GE	HERVW9	NM_001080409/-/['TCGA']
NonCanon	A8MXY4	ZNF99	19	22941540	1171	C	G	391	H	D	probably damaging	DOID:11934 / head and neck cancer/HERVW	-	4673	GE	HERVW9	NM_001080409/-/['TCGA']
NonCanon	A8MXY4	ZNF99	19	22940553	2158	C	G	720	L	V	probably damaging	DOID:11934 / head and neck cancer/HERVW	Gain|Phosphorylation	4673	GE	HERVW9	NM_001080409/-/['TCGA']
NonCanon	A8MXY4	ZNF99	19	22941189	1522	C	A	508	P	T	probably damaging	DOID:11934 / head and neck cancer/HERVW	Gain|Phosphorylation	4673	GE	HERVW9	NM_001080409/-/['TCGA']
NonCanon	A8MXY4	ZNF99	19	22941702	1009	G	T	337	G	X	-	DOID:11934 / head and neck cancer/HERVW	-	4673	GE	HERVW9	NM_001080409/-/['TCGA']
NonCanon	A8MXY4	ZNF99	19	22940808	1903	A	G	635	T	A	benign	DOID:11934 / head and neck cancer/HERVW	Gain|Phosphorylation	4673	GE	HERVW9	NM_001080409/-/['TCGA']
NonCanon	A8MXY4	ZNF99	19	22941701	1010	G	T	337	G	V	possibly damaging	DOID:11934 / head and neck cancer/HERVW	-	4673	GE	HERVW9	NM_001080409/-/['TCGA']
NonCanon	A8MXY4	ZNF99	19	22940345	2366	A	T	789	Y	F	possibly damaging	DOID:11934 / head and neck cancer/HERVW	-	4673	GE	HERVW9	NM_001080409/-/['TCGA']
NonCanon	A8MXY4	ZNF99	19	22941426	1285	G	A	429	E	K	probably damaging	DOID:11934 / head and neck cancer/HERVW	-	4673	GE	HERVW9	NM_001080409/-/['TCGA']
NonCanon	A8MXY4	ZNF99	19	22940555	2156	C	T	719	T	I	possibly damaging	DOID:11934 / head and neck cancer/HERVW	Gain|Phosphorylation	4673	GE	HERVW9	NM_001080409/-/['TCGA']
NonCanon	A8MXY4	ZNF99	19	22940748	1963	G	A	655	G	S	probably damaging	DOID:11934 / head and neck cancer/HERVW	Gain|Phosphorylation	4673	GE	HERVW9	NM_001080409/-/['TCGA']
NonCanon	A8MXY4	ZNF99	19	22940512	2199	C	A	733	Y	X	-	DOID:11934 / head and neck cancer/HERVW	-	4673	GE	HERVW9	NM_001080409/-/['TCGA']
NonCanon	A8MXY4	ZNF99	19	22940535	2176	A	C	726	I	L	possibly damaging	DOID:5041 / esophageal cancer/HERVW	-	4673	GE	HERVW9	NM_001080409/-/['ICGC']
NonCanon	A8MXY4	ZNF99	19	22940517	2194	C	T	732	P	S	probably damaging	DOID:5041 / esophageal cancer/HERVW	Gain|Phosphorylation	4673	GE	HERVW9	NM_001080409/23525077/['COSMIC']
NonCanon	A8MXY4	ZNF99	19	22940251	2460	A	C	820	E	D	probably damaging	DOID:5041 / esophageal cancer/HERVW	-	4673	GE	HERVW9	NM_001080409/23525077/['COSMIC']
NonCanon	A8MXY4	ZNF99	19	22941056	1655	T	A	552	L	H	probably damaging	DOID:5041 / esophageal cancer/HERVW	Gain|Glycosylation	4673	GE	HERVW9	NM_001080409/23525077/['COSMIC']
NonCanon	A8MXY4	ZNF99	19	22941479	1232	A	C	411	K	T	benign	DOID:5041 / esophageal cancer/HERVW	Gain|Phosphorylation	4673	GE	HERVW9	NM_001080409/23525077/['COSMIC']
NonCanon	A8MXY4	ZNF99	19	22941697	1014	G	C	338	K	N	benign	DOID:5041 / esophageal cancer/HERVW	-	4673	GE	HERVW9	NM_001080409/-/['ICGC']
NonCanon	A8MXY4	ZNF99	19	22941086	1625	G	A	542	C	Y	probably damaging	DOID:5041 / esophageal cancer/HERVW	Gain|Phosphorylation	4673	GE	HERVW9	NM_001080409/-/['ICGC']
NonCanon	A8MXY4	ZNF99	19	22941093	1618	G	A	540	E	K	possibly damaging	DOID:5041 / esophageal cancer/HERVW	-	4673	GE	HERVW9	NM_001080409/23525077/['COSMIC']
NonCanon	A8MXY4	ZNF99	19	22940456	2255	A	C	752	K	T	probably damaging	DOID:5041 / esophageal cancer/HERVW	Gain|Phosphorylation	4673	GE	HERVW9	NM_001080409/-/['ICGC']
NonCanon	A8MXY4	ZNF99	19	22940624	2087	A	C	696	K	T	possibly damaging	DOID:5041 / esophageal cancer/HERVW	Gain|Phosphorylation	4673	GE	HERVW9	NM_001080409/23525077/['COSMIC']
NonCanon	A8MXY4	ZNF99	19	22941000	1711	G	T	571	G	C	probably damaging	DOID:5041 / esophageal cancer/HERVW	-	4673	GE	HERVW9	NM_001080409/23525077/['COSMIC']
NonCanon	A8MXY4	ZNF99	19	22940827	1884	A	T	628	K	N	probably damaging	DOID:5041 / esophageal cancer/HERVW	-	4673	GE	HERVW9	NM_001080409/-/['ICGC', 'COSMIC']
NonCanon	A8MXY4	ZNF99	19	22940123	2588	T	G	863	M	R	probably damaging	DOID:5041 / esophageal cancer/HERVW	-	4673	GE	HERVW9	NM_001080409/-/['ICGC']
NonCanon	A8MXY4	ZNF99	19	22940969	1742	C	T	581	T	I	possibly damaging	DOID:5041 / esophageal cancer/HERVW	-	4673	GE	HERVW9	NM_001080409/23525077/['COSMIC']
NonCanon	A8MXY4	ZNF99	19	22940936	1775	C	T	592	P	L	probably damaging	DOID:5041 / esophageal cancer/HERVW	-	4673	GE	HERVW9	NM_001080409/-/['ICGC']
NonCanon	A8MXY4	ZNF99	19	22940321	2390	C	T	797	A	V	possibly damaging	DOID:5041 / esophageal cancer/HERVW	-	4673	GE	HERVW9	NM_001080409/-/['COSMIC', 'ICGC']
NonCanon	A8MXY4	ZNF99	19	22941211	1500	G	T	500	K	N	possibly damaging	DOID:219 / colon cancer/HERVW	Gain|Phosphorylation	4673	GE	HERVW9	NM_001080409/22895193/['COSMIC']
NonCanon	A8MXY4	ZNF99	19	22941392	1319	T	C	440	L	P	probably damaging	DOID:219 / colon cancer/HERVW	-	4673	GE	HERVW9	NM_001080409/22895193/['COSMIC']
NonCanon	A8MXY4	ZNF99	19	22941352	1359	C	A	453	Y	X	-	DOID:219 / colon cancer/HERVW	-	4673	GE	HERVW9	NM_001080409/-/['COSMIC', 'ICGC', 'TCGA']
NonCanon	A8MXY4	ZNF99	19	22941191	1520	A	T	507	K	I	possibly damaging	DOID:219 / colon cancer/HERVW	-	4673	GE	HERVW9	NM_001080409/-/['COSMIC', 'ICGC', 'TCGA']
NonCanon	A8MXY4	ZNF99	19	22941594	1117	G	T	373	E	X	-	DOID:219 / colon cancer/HERVW	-	4673	GE	HERVW9	NM_001080409/22810696/['COSMIC']
NonCanon	A8MXY4	ZNF99	19	22940807	1904	C	A	635	T	N	benign	DOID:219 / colon cancer/HERVW	Gain|Phosphorylation	4673	GE	HERVW9	NM_001080409/-/['COSMIC', 'ICGC', 'TCGA']
NonCanon	A8MXY4	ZNF99	19	22941234	1477	T	C	493	S	P	benign	DOID:219 / colon cancer/HERVW	-	4673	GE	HERVW9	NM_001080409/22895193/['COSMIC']
NonCanon	A8MXY4	ZNF99	19	22941524	1187	C	T	396	P	L	probably damaging	DOID:219 / colon cancer/HERVW	-	4673	GE	HERVW9	NM_001080409/-/['IntOGen']
NonCanon	A8MXY4	ZNF99	19	22941143	1568	C	A	523	A	D	benign	DOID:219 / colon cancer/HERVW	-	4673	GE	HERVW9	NM_001080409/-/['COSMIC']
NonCanon	A8MXY4	ZNF99	19	22941049	1662	A	C	554	K	N	probably damaging	DOID:219 / colon cancer/HERVW	-	4673	GE	HERVW9	NM_001080409/-/['COSMIC']
NonCanon	A8MXY4	ZNF99	19	22940555	2156	C	A	719	T	N	benign	DOID:219 / colon cancer/HERVW	Gain|Phosphorylation	4673	GE	HERVW9	NM_001080409/-/['IntOGen']	NM_001080409/22810696/['COSMIC']
NonCanon	A8MXY4	ZNF99	19	22940351	2360	A	T	787	K	I	possibly damaging	DOID:219 / colon cancer/HERVW	-	4673	GE	HERVW9	NM_001080409/-/['COSMIC']
NonCanon	A8MXY4	ZNF99	19	22940857	1854	G	T	618	K	N	possibly damaging	DOID:219 / colon cancer/HERVW	-	4673	GE	HERVW9	NM_001080409/-/['ICGC', 'TCGA']
NonCanon	A8MXY4	ZNF99	19	22940644	2067	C	A	689	F	L	benign	DOID:219 / colon cancer/HERVW	-	4673	GE	HERVW9	NM_001080409/-/['ICGC', 'TCGA']
NonCanon	A8MXY4	ZNF99	19	22941402	1309	T	G	437	F	V	benign	DOID:219 / colon cancer/HERVW	-	4673	GE	HERVW9	NM_001080409/22810696/['COSMIC']
NonCanon	A8MXY4	ZNF99	19	22940502	2209	G	T	737	E	X	-	DOID:219 / colon cancer/HERVW	-	4673	GE	HERVW9	NM_001080409/22810696/['COSMIC']
NonCanon	A8MXY4	ZNF99	19	22940791	1920	G	T	640	E	D	benign	DOID:219 / colon cancer/HERVW	Gain|Phosphorylation	4673	GE	HERVW9	NM_001080409/22810696/['COSMIC']
NonCanon	A8MXY4	ZNF99	19	22941071	1640	A	G	547	N	S	benign	DOID:10534 / stomach cancer/HERVW	Gain|Phosphorylation	4673	GE	HERVW9	NM_001080409/-/['COSMIC']
NonCanon	A8MXY4	ZNF99	19	22941591	1120	T	A	374	C	S	probably damaging	DOID:10534 / stomach cancer/HERVW	Gain|Phosphorylation	4673	GE	HERVW9	NM_001080409/-/['COSMIC']
NonCanon	A8MXY4	ZNF99	19	22941044	1667	A	T	556	K	M	probably damaging	DOID:10534 / stomach cancer/HERVW	-	4673	GE	HERVW9	NM_001080409/-/['ICGC', 'TCGA']
NonCanon	A8MXY4	ZNF99	19	22941224	1487	T	C	496	L	P	probably damaging	DOID:10534 / stomach cancer/HERVW	-	4673	GE	HERVW9	NM_001080409/-/['ICGC', 'TCGA']
NonCanon	A8MXY4	ZNF99	19	22940942	1769	A	G	590	E	G	possibly damaging	DOID:10534 / stomach cancer/HERVW	Gain|Phosphorylation	4673	GE	HERVW9	NM_001080409/-/['ICGC', 'TCGA']
NonCanon	A8MXY4	ZNF99	19	22941111	1600	A	G	534	K	E	benign	DOID:10534 / stomach cancer/HERVW	-	4673	GE	HERVW9	NM_001080409/-/['COSMIC']
NonCanon	A8MXY4	ZNF99	19	22940707	2004	A	C	668	K	N	probably damaging	DOID:10534 / stomach cancer/HERVW	-	4673	GE	HERVW9	NM_001080409/-/['ICGC', 'TCGA']
NonCanon	A8MXY4	ZNF99	19	22940729	1982	C	A	661	S	Y	possibly damaging	DOID:10534 / stomach cancer/HERVW	-	4673	GE	HERVW9	NM_001080409/-/['ICGC', 'TCGA']
NonCanon	A8MXY4	ZNF99	19	22941617	1094	A	G	365	E	G	benign	DOID:10534 / stomach cancer/HERVW	-	4673	GE	HERVW9	NM_001080409/-/['COSMIC']
NonCanon	A8MXY4	ZNF99	19	22940694	2017	G	A	673	E	K	benign	DOID:10534 / stomach cancer/HERVW	Gain|Phosphorylation	4673	GE	HERVW9	NM_001080409/-/['COSMIC']
NonCanon	A8MXY4	ZNF99	19	22940429	2282	G	C	761	C	S	benign	DOID:1793 / pancreatic cancer/HERVW	-	4673	GE	HERVW9	NM_001080409/-/['TCGA']
NonCanon	A8MXY4	ZNF99	19	22941279	1432	G	C	478	E	Q	probably damaging	DOID:1793 / pancreatic cancer/HERVW	-	4673	GE	HERVW9	NM_001080409/-/['TCGA']
NonCanon	A8MXY4	ZNF99	19	22940373	2338	A	G	780	K	E	probably damaging	DOID:1793 / pancreatic cancer/HERVW	-	4673	GE	HERVW9	NM_001080409/-/['TCGA']
NonCanon	A8MXY4	ZNF99	19	22941527	1184	A	C	395	K	T	probably damaging	DOID:1793 / pancreatic cancer/HERVW	Gain|Phosphorylation	4673	GE	HERVW9	NM_001080409/-/['TCGA']
NonCanon	A8MXY4	ZNF99	19	22940499	2212	T	G	738	C	G	probably damaging	DOID:1793 / pancreatic cancer/HERVW	Gain|Phosphorylation	4673	GE	HERVW9	NM_001080409/-/['COSMIC', 'ICGC']
NonCanon	A8MXY4	ZNF99	19	22940990	1721	T	G	574	F	C	probably damaging	DOID:1793 / pancreatic cancer/HERVW	Gain|Phosphorylation	4673	GE	HERVW9	NM_001080409/-/['TCGA']
NonCanon	A8MXY4	ZNF99	19	22940484	2227	A	C	743	K	Q	benign	DOID:1793 / pancreatic cancer/HERVW	Gain|Phosphorylation	4673	GE	HERVW9	NM_001080409/-/['TCGA']
NonCanon	A8MXY4	ZNF99	19	22941316	1395	T	G	465	F	L	benign	DOID:1793 / pancreatic cancer/HERVW	Gain|Glycosylation	4673	GE	HERVW9	NM_001080409/-/['TCGA']
NonCanon	A8MXY4	ZNF99	19	22940792	1919	A	C	640	E	A	benign	DOID:1793 / pancreatic cancer/HERVW	Gain|Phosphorylation	4673	GE	HERVW9	NM_001080409/-/['COSMIC']
NonCanon	A8MXY4	ZNF99	19	22941336	1375	A	G	459	S	G	benign	DOID:1793 / pancreatic cancer/HERVW	-	4673	GE	HERVW9	NM_001080409/-/['TCGA']
NonCanon	A8MXY4	ZNF99	19	22940973	1738	C	A	580	L	I	probably damaging	DOID:1793 / pancreatic cancer/HERVW	-	4673	GE	HERVW9	NM_001080409/24293293/['COSMIC']
NonCanon	A8MXY4	ZNF99	19	22940448	2263	C	A	755	H	N	probably damaging	DOID:1793 / pancreatic cancer/HERVW	-	4673	GE	HERVW9	NM_001080409/-/['TCGA']
NonCanon	A8MXY4	ZNF99	19	22941129	1582	A	C	528	K	Q	probably damaging	DOID:1793 / pancreatic cancer/HERVW	-	4673	GE	HERVW9	NM_001080409/-/['TCGA']
NonCanon	A8MXY4	ZNF99	19	22941668	1043	A	C	348	K	T	probably damaging	DOID:1793 / pancreatic cancer/HERVW	-	4673	GE	HERVW9	NM_001080409/-/['TCGA']
NonCanon	A8MXY4	ZNF99	19	22940808	1903	A	G	635	T	A	benign	DOID:0060119 / pharynx cancer/HERVW	Gain|Phosphorylation	4673	GE	HERVW9	NM_001080409/-/['IntOGen']
NonCanon	A8MXY4	ZNF99	19	22940553	2158	C	G	720	L	V	probably damaging	DOID:0060119 / pharynx cancer/HERVW	Gain|Phosphorylation	4673	GE	HERVW9	NM_001080409/-/['IntOGen']
NonCanon	A8MXY4	ZNF99	19	22940586	2125	G	C	709	E	Q	possibly damaging	DOID:0060119 / pharynx cancer/HERVW	-	4673	GE	HERVW9	NM_001080409/-/['IntOGen']
NonCanon	A8MXY4	ZNF99	19	22940512	2199	C	A	733	Y	X	-	DOID:0060119 / pharynx cancer/HERVW	-	4673	GE	HERVW9	NM_001080409/-/['IntOGen']
NonCanon	A8MXY4	ZNF99	19	22940817	1894	C	T	632	Q	X	-	DOID:0060119 / pharynx cancer/HERVW	-	4673	GE	HERVW9	NM_001080409/-/['IntOGen']
NonCanon	A8MXY4	ZNF99	19	22940600	2111	C	G	704	P	R	probably damaging	DOID:0060119 / pharynx cancer/HERVW	-	4673	GE	HERVW9	NM_001080409/-/['IntOGen']
NonCanon	A8MXY4	ZNF99	19	22941528	1183	A	C	395	K	Q	probably damaging	DOID:0060119 / pharynx cancer/HERVW	-	4673	GE	HERVW9	NM_001080409/-/['IntOGen']
NonCanon	A8MXY4	ZNF99	19	22941426	1285	G	A	429	E	K	probably damaging	DOID:0060119 / pharynx cancer/HERVW	-	4673	GE	HERVW9	NM_001080409/-/['IntOGen']
NonCanon	A8MXY4	ZNF99	19	22940345	2366	A	T	789	Y	F	possibly damaging	DOID:0060119 / pharynx cancer/HERVW	-	4673	GE	HERVW9	NM_001080409/-/['IntOGen']
NonCanon	A8MXY4	ZNF99	19	22941189	1522	C	A	508	P	T	probably damaging	DOID:0060119 / pharynx cancer/HERVW	Gain|Phosphorylation	4673	GE	HERVW9	NM_001080409/-/['IntOGen']
NonCanon	A8MXY4	ZNF99	19	22941431	1280	G	T	427	C	F	possibly damaging	DOID:0060119 / pharynx cancer/HERVW	-	4673	GE	HERVW9	NM_001080409/-/['IntOGen']
NonCanon	A8MXY4	ZNF99	19	22941292	1419	A	G	473	I	M	possibly damaging	DOID:10283 / prostate cancer/HERVW	-	4673	GE	HERVW9	NM_001080409/22610119/['COSMIC']
NonCanon	A8MXY4	ZNF99	19	22941279	1432	G	C	478	E	Q	probably damaging	DOID:10283 / prostate cancer/HERVW	-	4673	GE	HERVW9	NM_001080409/-/['COSMIC']
NonCanon	A8MXY4	ZNF99	19	22941275	1436	A	G	479	K	R	possibly damaging	DOID:10283 / prostate cancer/HERVW	-	4673	GE	HERVW9	NM_001080409/-/['ICGC', 'TCGA']
NonCanon	A8MXY4	ZNF99	19	22941591	1120	T	A	374	C	S	probably damaging	DOID:10283 / prostate cancer/HERVW	Gain|Phosphorylation	4673	GE	HERVW9	NM_001080409/-/['ICGC']
NonCanon	A8MXY4	ZNF99	19	22941557	1154	G	T	385	R	I	benign	DOID:10283 / prostate cancer/HERVW	-	4673	GE	HERVW9	NM_001080409/22610119/['COSMIC']
NonCanon	A8MXY4	ZNF99	19	22940373	2338	A	G	780	K	E	probably damaging	DOID:10283 / prostate cancer/HERVW	-	4673	GE	HERVW9	NM_001080409/-/['COSMIC', 'ICGC', 'TCGA']
NonCanon	A8MXY4	ZNF99	19	22941154	1557	G	C	519	K	N	benign	DOID:10283 / prostate cancer/HERVW	-	4673	GE	HERVW9	NM_001080409/-/['TCGA']
NonCanon	A8MXY4	ZNF99	19	22941286	1425	T	A	475	H	Q	probably damaging	DOID:10283 / prostate cancer/HERVW	-	4673	GE	HERVW9	NM_001080409/22722839/['COSMIC']
NonCanon	A8MXY4	ZNF99	19	22941111	1600	A	G	534	K	E	benign	DOID:10283 / prostate cancer/HERVW	-	4673	GE	HERVW9	NM_001080409/-/['ICGC']
NonCanon	A8MXY4	ZNF99	19	22940411	2300	G	T	767	G	V	probably damaging	DOID:363 / uterine cancer/HERVW	-	4673	GE	HERVW9	NM_001080409/-/['COSMIC', 'IntOGen', 'TCGA']
NonCanon	A8MXY4	ZNF99	19	22941329	1382	C	T	461	A	V	probably damaging	DOID:363 / uterine cancer/HERVW	-	4673	GE	HERVW9	NM_001080409/-/['COSMIC', 'TCGA']
NonCanon	A8MXY4	ZNF99	19	22941377	1334	T	C	445	I	T	possibly damaging	DOID:363 / uterine cancer/HERVW	Gain|Phosphorylation	4673	GE	HERVW9	NM_001080409/-/['COSMIC', 'TCGA']
NonCanon	A8MXY4	ZNF99	19	22941379	1332	G	T	444	K	N	possibly damaging	DOID:363 / uterine cancer/HERVW	Gain|Phosphorylation	4673	GE	HERVW9	NM_001080409/-/['TCGA', 'COSMIC']
NonCanon	A8MXY4	ZNF99	19	22940594	2117	A	C	706	K	T	probably damaging	DOID:363 / uterine cancer/HERVW	Gain|Phosphorylation	4673	GE	HERVW9	NM_001080409/-/['COSMIC', 'TCGA']
NonCanon	A8MXY4	ZNF99	19	22940624	2087	A	C	696	K	T	possibly damaging	DOID:363 / uterine cancer/HERVW	Gain|Phosphorylation	4673	GE	HERVW9	NM_001080409/-/['TCGA']
NonCanon	A8MXY4	ZNF99	19	22940633	2078	G	A	693	R	K	benign	DOID:363 / uterine cancer/HERVW	-	4673	GE	HERVW9	NM_001080409/-/['COSMIC', 'TCGA']
NonCanon	A8MXY4	ZNF99	19	22940896	1815	C	A	605	F	L	benign	DOID:363 / uterine cancer/HERVW	-	4673	GE	HERVW9	NM_001080409/-/['COSMIC', 'TCGA']
NonCanon	A8MXY4	ZNF99	19	22940907	1804	T	A	602	F	I	probably damaging	DOID:1319 / brain cancer/HERVW	-	4673	GE	HERVW9	NM_001080409/22832583/['COSMIC']	NM_001080409/-/['IntOGen', 'ICGC']
NonCanon	A8MXY4	ZNF99	19	22941129	1582	A	C	528	K	Q	probably damaging	DOID:1319 / brain cancer/HERVW	-	4673	GE	HERVW9	NM_001080409/-/['IntOGen', 'COSMIC']
NonCanon	A8MXY4	ZNF99	19	22941588	1123	G	A	375	G	S	probably damaging	DOID:1319 / brain cancer/HERVW	-	4673	GE	HERVW9	NM_001080409/-/['COSMIC', 'IntOGen']
NonCanon	A8MXY4	ZNF99	19	22941101	1610	A	G	537	Y	C	possibly damaging	DOID:1319 / brain cancer/HERVW	-	4673	GE	HERVW9	NM_001080409/-/['ICGC', 'TCGA']
NonCanon	A8MXY4	ZNF99	19	22940690	2021	A	G	674	E	G	probably damaging	DOID:1319 / brain cancer/HERVW	-	4673	GE	HERVW9	NM_001080409/-/['COSMIC', 'IntOGen']
NonCanon	A8MXY4	ZNF99	19	22941405	1306	C	T	436	R	C	probably damaging	DOID:1319 / brain cancer/HERVW	Gain|Phosphorylation	4673	GE	HERVW9	NM_001080409/-/['COSMIC', 'IntOGen']
NonCanon	A8MXY4	ZNF99	19	22941396	1315	G	T	439	A	S	benign	DOID:1319 / brain cancer/HERVW	-	4673	GE	HERVW9	NM_001080409/-/['COSMIC', 'IntOGen']
NonCanon	A8MXY4	ZNF99	19	22941154	1557	G	C	519	K	N	benign	DOID:1319 / brain cancer/HERVW	-	4673	GE	HERVW9	NM_001080409/-/['IntOGen', 'COSMIC']
NonCanon	A8MXY4	ZNF99	19	22940645	2066	T	A	689	F	Y	probably damaging	DOID:1319 / brain cancer/HERVW	-	4673	GE	HERVW9	NM_001080409/-/['COSMIC', 'IntOGen']
NonCanon	A8MXY4	ZNF99	19	22940853	1858	C	G	620	P	A	probably damaging	DOID:263 / kidney cancer/HERVW	-	4673	GE	HERVW9	NM_001080409/-/['COSMIC']
NonCanon	A8MXY4	ZNF99	19	22940439	2272	G	C	758	E	Q	probably damaging	DOID:263 / kidney cancer/HERVW	-	4673	GE	HERVW9	NM_001080409/-/['COSMIC', 'IntOGen', 'ICGC', 'TCGA']
NonCanon	A8MXY4	ZNF99	19	22940373	2338	A	G	780	K	E	probably damaging	DOID:263 / kidney cancer/HERVW	-	4673	GE	HERVW9	NM_001080409/-/['COSMIC']
NonCanon	A8MXY4	ZNF99	19	22941154	1557	G	C	519	K	N	benign	DOID:263 / kidney cancer/HERVW	-	4673	GE	HERVW9	NM_001080409/-/['COSMIC', 'ICGC', 'TCGA']
NonCanon	A8MXY4	ZNF99	19	22941081	1630	A	T	544	K	X	-	DOID:263 / kidney cancer/HERVW	-	4673	GE	HERVW9	NM_001080409/-/['COSMIC']
NonCanon	A8MXY4	ZNF99	19	22940441	2270	C	G	757	A	G	benign	DOID:263 / kidney cancer/HERVW	-	4673	GE	HERVW9	NM_001080409/-/['TCGA']
NonCanon	A8MXY4	ZNF99	19	22941129	1582	A	C	528	K	Q	probably damaging	DOID:263 / kidney cancer/HERVW	-	4673	GE	HERVW9	NM_001080409/-/['COSMIC', 'ICGC', 'TCGA', 'TCGA']
NonCanon	A8MXY4	ZNF99	19	22940853	1858	C	G	620	P	A	probably damaging	DOID:1993 / rectum cancer/HERVW	-	4673	GE	HERVW9	NM_001080409/-/['ICGC']
NonCanon	A8MXY4	ZNF99	19	22940986	1725	G	T	575	K	N	benign	DOID:1993 / rectum cancer/HERVW	Gain|Glycosylation	4673	GE	HERVW9	NM_001080409/22810696/['COSMIC']
NonCanon	A8MXY4	ZNF99	19	22941081	1630	A	T	544	K	X	-	DOID:1993 / rectum cancer/HERVW	-	4673	GE	HERVW9	NM_001080409/-/['ICGC']
NonCanon	A8MXY4	ZNF99	19	22941342	1369	G	T	457	E	X	-	DOID:1993 / rectum cancer/HERVW	-	4673	GE	HERVW9	NM_001080409/22810696/['COSMIC']
NonCanon	A8MXY4	ZNF99	19	22941641	1070	G	T	357	R	I	benign	DOID:1993 / rectum cancer/HERVW	-	4673	GE	HERVW9	NM_001080409/-/['ICGC', 'TCGA', 'COSMIC']
NonCanon	A8MXY4	ZNF99	19	22941524	1187	C	T	396	P	L	probably damaging	DOID:1993 / rectum cancer/HERVW	-	4673	GE	HERVW9	NM_001080409/22810696/['COSMIC']
NonCanon	A8MXY4	ZNF99	19	22940896	1815	C	A	605	F	L	benign	DOID:1993 / rectum cancer/HERVW	-	4673	GE	HERVW9	NM_001080409/-/['COSMIC', 'ICGC', 'TCGA']
NonCanon	A8MXY4	ZNF99	19	22940528	2183	C	A	728	T	N	possibly damaging	DOID:1993 / rectum cancer/HERVW	-	4673	GE	HERVW9	NM_001080409/22810696/['COSMIC']
NonCanon	A8MXY4	ZNF99	19	22940502	2209	G	A	737	E	K	probably damaging	DOID:1993 / rectum cancer/HERVW	Gain|Phosphorylation	4673	GE	HERVW9	NM_001080409/-/['ICGC', 'TCGA', 'COSMIC']
NonCanon	A8MXY4	ZNF99	19	22941062	1649	C	T	550	S	L	probably damaging	DOID:4362 / cervical cancer/HERVW	Gain|Phosphorylation	4673	GE	HERVW9	NM_001080409/-/['TCGA']
NonCanon	A8MXY4	ZNF99	19	22941336	1375	A	G	459	S	G	benign	DOID:4362 / cervical cancer/HERVW	-	4673	GE	HERVW9	NM_001080409/-/['TCGA']
NonCanon	A8MXY4	ZNF99	19	22941316	1395	T	G	465	F	L	benign	DOID:4362 / cervical cancer/HERVW	Gain|Glycosylation	4673	GE	HERVW9	NM_001080409/-/['COSMIC', 'TCGA']
NonCanon	A8MXY4	ZNF99	19	22941111	1600	A	G	534	K	E	benign	DOID:4362 / cervical cancer/HERVW	-	4673	GE	HERVW9	NM_001080409/-/['COSMIC', 'TCGA']
NonCanon	A8MXY4	ZNF99	19	22940625	2086	A	C	696	K	Q	possibly damaging	DOID:4362 / cervical cancer/HERVW	-	4673	GE	HERVW9	NM_001080409/-/['TCGA']
NonCanon	A8MXY4	ZNF99	19	22940786	1925	T	G	642	I	S	probably damaging	DOID:4362 / cervical cancer/HERVW	Gain|Phosphorylation	4673	GE	HERVW9	NM_001080409/-/['TCGA']
NonCanon	A8MXY4	ZNF99	19	22940607	2104	A	G	702	K	E	benign	DOID:4362 / cervical cancer/HERVW	-	4673	GE	HERVW9	NM_001080409/-/['TCGA']
NonCanon	A8MXY4	ZNF99	19	22940859	1852	A	G	618	K	E	benign	DOID:4362 / cervical cancer/HERVW	-	4673	GE	HERVW9	NM_001080409/-/['TCGA']
NonCanon	A8MXY4	ZNF99	19	22941065	1646	C	A	549	S	Y	possibly damaging	DOID:11054 / urinary bladder cancer/HERVW	-	4673	GE	HERVW9	NM_001080409/-/['COSMIC', 'IntOGen']
NonCanon	A8MXY4	ZNF99	19	22940978	1733	C	T	578	S	L	probably damaging	DOID:11054 / urinary bladder cancer/HERVW	-	4673	GE	HERVW9	NM_001080409/-/['COSMIC', 'IntOGen', 'ICGC', 'TCGA']
NonCanon	A8MXY4	ZNF99	19	22940381	2330	G	A	777	R	K	benign	DOID:11054 / urinary bladder cancer/HERVW	-	4673	GE	HERVW9	NM_001080409/-/['COSMIC', 'IntOGen', 'ICGC', 'TCGA']
NonCanon	A8MXY4	ZNF99	19	22941314	1397	C	T	466	S	L	possibly damaging	DOID:11054 / urinary bladder cancer/HERVW	-	4673	GE	HERVW9	NM_001080409/-/['IntOGen', 'ICGC', 'TCGA', 'COSMIC']
NonCanon	A8MXY4	ZNF99	19	22941120	1591	C	T	531	H	Y	probably damaging	DOID:11054 / urinary bladder cancer/HERVW	-	4673	GE	HERVW9	NM_001080409/-/['COSMIC', 'IntOGen', 'ICGC', 'TCGA']
NonCanon	A8MXY4	ZNF99	19	22941405	1306	C	T	436	R	C	probably damaging	DOID:3070 / malignant glioma/HERVW	Gain|Phosphorylation	4673	GE	HERVW9	NM_001080409/-/['ICGC', 'TCGA']
NonCanon	A8MXY4	ZNF99	19	22940645	2066	T	A	689	F	Y	probably damaging	DOID:3070 / malignant glioma/HERVW	-	4673	GE	HERVW9	NM_001080409/-/['ICGC', 'TCGA']
NonCanon	A8MXY4	ZNF99	19	22941129	1582	A	C	528	K	Q	probably damaging	DOID:3070 / malignant glioma/HERVW	-	4673	GE	HERVW9	NM_001080409/-/['ICGC', 'TCGA']
NonCanon	A8MXY4	ZNF99	19	22940690	2021	A	G	674	E	G	probably damaging	DOID:3070 / malignant glioma/HERVW	-	4673	GE	HERVW9	NM_001080409/-/['ICGC', 'TCGA']
NonCanon	A8MXY4	ZNF99	19	22941154	1557	G	C	519	K	N	benign	DOID:3070 / malignant glioma/HERVW	-	4673	GE	HERVW9	NM_001080409/-/['ICGC', 'TCGA']
NonCanon	A8MXY4	ZNF99	19	22941396	1315	G	T	439	A	S	benign	DOID:3070 / malignant glioma/HERVW	-	4673	GE	HERVW9	NM_001080409/-/['ICGC', 'TCGA']
NonCanon	A8MXY4	ZNF99	19	22941588	1123	G	A	375	G	S	probably damaging	DOID:3070 / malignant glioma/HERVW	-	4673	GE	HERVW9	NM_001080409/-/['ICGC', 'TCGA']
NonCanon	A8MXY4	ZNF99	19	22940885	1826	G	C	609	R	T	benign	DOID:1612 / breast cancer/HERVW	Gain|Phosphorylation	4673	GE	HERVW9	NM_001080409/22495314/['COSMIC']	NM_001080409/-/['IntOGen']
NonCanon	A8MXY4	ZNF99	19	22941129	1582	A	G	528	K	E	possibly damaging	DOID:1612 / breast cancer/HERVW	-	4673	GE	HERVW9	NM_001080409/-/['COSMIC', 'ICGC', 'TCGA']
NonCanon	A8MXY4	ZNF99	19	22941252	1459	G	A	487	G	S	probably damaging	DOID:1612 / breast cancer/HERVW	Gain|Phosphorylation	4673	GE	HERVW9	NM_001080409/-/['COSMIC', 'IntOGen', 'ICGC', 'TCGA']
NonCanon	A8MXY4	ZNF99	19	22941531	1180	C	T	394	Q	X	-	DOID:1612 / breast cancer/HERVW	-	4673	GE	HERVW9	NM_001080409/-/['COSMIC', 'IntOGen', 'ICGC', 'TCGA']
NonCanon	A8MXY4	ZNF99	19	22940742	1969	G	T	657	A	S	possibly damaging	DOID:1612 / breast cancer/HERVW	Gain|Phosphorylation	4673	GE	HERVW9	NM_001080409/-/['IntOGen', 'ICGC', 'TCGA', 'COSMIC']
NonCanon	A8MXY4	ZNF99	19	22940729	1982	C	T	661	S	F	benign	DOID:1612 / breast cancer/HERVW	-	4673	GE	HERVW9	NM_001080409/-/['TCGA']
NonCanon	A8MXY4	ZNF99	19	22940675	2036	G	T	679	C	F	probably damaging	DOID:1612 / breast cancer/HERVW	-	4673	GE	HERVW9	NM_001080409/-/['COSMIC', 'ICGC', 'TCGA']
NonCanon	A8MXY4	ZNF99	19	22941170	1541	G	A	514	C	Y	probably damaging	DOID:3571 / liver cancer/HERVW	-	4673	GE	HERVW9	NM_001080409/-/['ICGC', 'COSMIC']
NonCanon	A8MXY4	ZNF99	19	22940429	2282	G	C	761	C	S	benign	DOID:3571 / liver cancer/HERVW	-	4673	GE	HERVW9	NM_001080409/-/['TCGA']
NonCanon	A8MXY4	ZNF99	19	22940610	2101	G	T	701	G	X	-	DOID:3571 / liver cancer/HERVW	-	4673	GE	HERVW9	NM_001080409/-/['TCGA']
NonCanon	A8MXY4	ZNF99	19	22940398	2313	G	C	771	K	N	benign	DOID:3571 / liver cancer/HERVW	-	4673	GE	HERVW9	NM_001080409/-/['COSMIC']
NonCanon	A8MXY4	ZNF99	19	22940135	2576	C	A	859	P	H	-	DOID:3571 / liver cancer/HERVW	-	4673	GE	HERVW9	NM_001080409/-/['COSMIC', 'ICGC']
NonCanon	A8MXY4	ZNF99	19	22940609	2102	G	T	701	G	V	probably damaging	DOID:3571 / liver cancer/HERVW	-	4673	GE	HERVW9	NM_001080409/-/['TCGA']
NonCanon	A8MXY4	ZNF99	19	22940355	2356	A	G	786	K	E	benign	DOID:1909 / melanoma/HERVW	-	4673	GE	HERVW9	NM_001080409/24265154/['COSMIC']
NonCanon	A8MXY4	ZNF99	19	22941129	1582	A	G	528	K	E	possibly damaging	DOID:1909 / melanoma/HERVW	-	4673	GE	HERVW9	NM_001080409/24265154/['COSMIC']
NonCanon	A8MXY4	ZNF99	19	22940607	2104	A	G	702	K	E	benign	DOID:1909 / melanoma/HERVW	-	4673	GE	HERVW9	NM_001080409/24265154/['COSMIC']
NonCanon	A8MXY4	ZNF99	19	22941093	1618	G	A	540	E	K	possibly damaging	DOID:1909 / melanoma/HERVW	-	4673	GE	HERVW9	NM_001080409/22622578/['COSMIC']
NonCanon	A8MXY4	ZNF99	19	22940780	1931	C	G	644	T	S	benign	DOID:2394 / ovarian cancer/HERVW	-	4673	GE	HERVW9	NM_001080409/-/['COSMIC', 'ICGC']
NonCanon	A8MXY4	ZNF99	19	22941246	1465	G	T	489	A	S	probably damaging	DOID:2394 / ovarian cancer/HERVW	-	4673	GE	HERVW9	NM_001080409/-/['IntOGen']	NM_001080409/21720365/['COSMIC']
NonCanon	A8MXY4	ZNF99	19	22941329	1382	C	A	461	A	D	probably damaging	DOID:1192 / peripheral nervous system neoplasm/HERVW	-	4673	GE	HERVW9	NM_001080409/23334666/['COSMIC']
NonCanon	A8MXY4	ZNF99	19	22940644	2067	C	A	689	F	L	benign	DOID:1521 / cecum cancer/HERVW	-	4673	GE	HERVW9	NM_001080409/-/['COSMIC']
NonCanon	A8MXY4	ZNF99	19	22940857	1854	G	T	618	K	N	possibly damaging	DOID:1521 / cecum cancer/HERVW	-	4673	GE	HERVW9	NM_001080409/-/['COSMIC']
NonCanon	A8MXY4	ZNF99	19	22940642	2069	C	T	690	S	L	probably damaging	DOID:2531 / hematologic cancer/HERVW	-	4673	GE	HERVW9	NM_001080409/22158541/['COSMIC']	NM_001080409/-/['IntOGen', 'ICGC']
NonCanon	A8MXY4	ZNF99	19	22940586	2125	G	C	709	E	Q	possibly damaging	DOID:8618 / oral cavity cancer/HERVW	-	4673	GE	HERVW9	NM_001080409/23619168/['COSMIC']
NonCanon	P43626	KIR2DL1	19	55284790	76	C	T	26	H	Y	benign	DOID:4159 / skin cancer/MST	-	4780	S		NM_014218/-/['ICGC', 'TCGA']
NonCanon	P43626	KIR2DL1	19	55284956	242	C	T	81	S	F	benign	DOID:4159 / skin cancer/MST	-	4780	S		NM_014218/-/['TCGA']
NonCanon	P43626	KIR2DL1	19	55285022	308	C	T	103	S	F	probably damaging	DOID:4159 / skin cancer/MST	Gain|Phosphorylation	4780	S		NM_014218/-/['ICGC', 'TCGA']
NonCanon	P43626	KIR2DL1	19	55284800	86	C	T	29	P	L	probably damaging	DOID:4159 / skin cancer/MST	-	4780	S		NM_014218/-/['ICGC', 'TCGA']
NonCanon	P43626	KIR2DL1	19	55286868	622	G	A	208	E	K	benign	DOID:4159 / skin cancer/MST	-	4780	S		NM_014218/-/['ICGC', 'TCGA']
NonCanon	P43626	KIR2DL1	19	55285018	304	G	A	102	G	S	probably damaging	DOID:4159 / skin cancer/MST	Gain|Phosphorylation	4780	S		NM_014218/-/['ICGC', 'TCGA']
NonCanon	P43626	KIR2DL1	19	55286728	482	C	T	161	S	F	probably damaging	DOID:4159 / skin cancer/MST	-	4780	S		NM_014218/-/['ICGC', 'TCGA']
NonCanon	P43626	KIR2DL1	19	55286808	562	G	A	188	G	S	possibly damaging	DOID:4159 / skin cancer/MST	-	4780	S		NM_014218/-/['ICGC', 'TCGA']
NonCanon	P43626	KIR2DL1	19	55286731	485	G	C	162	R	T	possibly damaging	DOID:4159 / skin cancer/MST	Gain|Phosphorylation	4780	S		NM_014218/24838835/['COSMIC']
NonCanon	P43626	KIR2DL1	19	55284899	185	G	A	62	R	K	possibly damaging	DOID:4159 / skin cancer/MST	-	4780	S		NM_014218/-/['ICGC', 'TCGA']
NonCanon	P43626	KIR2DL1	19	55285060	346	G	A	116	D	N	probably damaging	DOID:4159 / skin cancer/MST	Loss|Binding Site	4780	S		NM_014218/-/['TCGA']
NonCanon	P43626	KIR2DL1	19	55284794	80	G	A	27	R	K	benign	DOID:4159 / skin cancer/MST	-	4780	S		NM_014218/-/['ICGC', 'TCGA']
NonCanon	P43626	KIR2DL1	19	55290064	665	G	A	222	G	E	benign	DOID:4159 / skin cancer/MST	-	4780	S		NM_014218/-/['ICGC', 'TCGA']
NonCanon	P43626	KIR2DL1	19	55285036	322	C	T	108	P	S	benign	DOID:4159 / skin cancer/MST	-	4780	S		NM_014218/-/['ICGC', 'TCGA']
NonCanon	P43626	KIR2DL1	19	55286802	556	C	T	186	P	S	benign	DOID:4159 / skin cancer/MST	-	4780	S		NM_014218/-/['ICGC', 'TCGA']
NonCanon	P43626	KIR2DL1	19	55286736	490	G	A	164	G	R	possibly damaging	DOID:4159 / skin cancer/MST	-	4780	S		NM_014218/-/['ICGC', 'TCGA']
NonCanon	P43626	KIR2DL1	19	55286856	610	G	C	204	D	H	benign	DOID:4159 / skin cancer/MST	Gain|Phosphorylation	4780	S		NM_014218/-/['ICGC', 'TCGA']
NonCanon	P43626	KIR2DL1	19	55285069	355	G	A	119	D	N	benign	DOID:4159 / skin cancer/MST	-	4780	S		NM_014218/-/['ICGC', 'TCGA']
NonCanon	P43626	KIR2DL1	19	55290088	689	C	T	230	S	L	possibly damaging	DOID:4159 / skin cancer/MST	-	4780	S		NM_014218/-/['ICGC', 'TCGA']
NonCanon	P43626	KIR2DL1	19	55284920	206	C	A	69	T	N	possibly damaging	DOID:4159 / skin cancer/MST	Loss|+2 from N-linked Glycosylation	4780	S		NM_014218/-/['ICGC', 'TCGA']
NonCanon	P43626	KIR2DL1	19	55281307	5	C	T	2	S	L	benign	DOID:4159 / skin cancer/MST	-	4780	S		NM_014218/-/['ICGC', 'TCGA']
NonCanon	P43626	KIR2DL1	19	55286782	536	G	A	179	G	E	probably damaging	DOID:4159 / skin cancer/MST	Loss|+1 from N-linked Glycosylation	4780	S		NM_014218/-/['ICGC', 'TCGA']
NonCanon	P43626	KIR2DL1	19	55286854	608	A	G	203	H	R	benign	DOID:1781 / thyroid cancer/MST	Gain|Phosphorylation	4780	S		NM_014218/-/['ICGC', 'COSMIC']
NonCanon	P43626	KIR2DL1	19	55286757	511	C	T	171	L	F	benign	DOID:1781 / thyroid cancer/MST	-	4780	S		NM_014218/-/['ICGC', 'COSMIC']
NonCanon	P43626	KIR2DL1	19	55286731	485	G	C	162	R	T	possibly damaging	DOID:1781 / thyroid cancer/MST	Gain|Phosphorylation	4780	S		NM_014218/-/['COSMIC', 'ICGC']
NonCanon	P43626	KIR2DL1	19	55284787	73	G	T	25	V	F	benign	DOID:1781 / thyroid cancer/MST	-	4780	S		NM_014218/-/['COSMIC', 'ICGC']
NonCanon	P43626	KIR2DL1	19	55286677	431	A	G	144	N	S	benign	DOID:1781 / thyroid cancer/MST	Gain|Phosphorylation	4780	S		NM_014218/-/['COSMIC', 'ICGC']
NonCanon	P43626	KIR2DL1	19	55286809	563	G	A	188	G	D	possibly damaging	DOID:1781 / thyroid cancer/MST	-	4780	S		NM_014218/-/['COSMIC', 'ICGC']
NonCanon	P43626	KIR2DL1	19	55284976	262	A	G	88	S	G	benign	DOID:1781 / thyroid cancer/MST	-	4780	S		NM_014218/-/['COSMIC', 'ICGC']
NonCanon	P43626	KIR2DL1	19	55281315	13	G	T	5	V	F	possibly damaging	DOID:1781 / thyroid cancer/MST	-	4780	S		NM_014218/-/['ICGC', 'COSMIC']
NonCanon	P43626	KIR2DL1	19	55284791	77	A	G	26	H	R	benign	DOID:1781 / thyroid cancer/MST	-	4780	S		NM_014218/-/['COSMIC', 'ICGC']
NonCanon	P43626	KIR2DL1	19	55286820	574	C	A	192	H	N	possibly damaging	DOID:1781 / thyroid cancer/MST	-	4780	S		NM_014218/-/['ICGC', 'TCGA']
NonCanon	P43626	KIR2DL1	19	55286854	608	A	G	203	H	R	benign	DOID:1324 / lung cancer/MST	Gain|Phosphorylation	4780	S		NM_014218/22980975/['COSMIC']
NonCanon	P43626	KIR2DL1	19	55284809	95	T	C	32	L	P	probably damaging	DOID:1324 / lung cancer/MST	-	4780	S		NM_014218/22980975/['COSMIC']
NonCanon	P43626	KIR2DL1	19	55282330	64	C	A	22	H	N	possibly damaging	DOID:1324 / lung cancer/MST	Gain|Phosphorylation	4780	S		NM_014218/-/['IntOGen']
NonCanon	P43626	KIR2DL1	19	55285022	308	C	A	103	S	Y	probably damaging	DOID:1324 / lung cancer/MST	Gain|Phosphorylation	4780	S		NM_014218/22980975/['COSMIC']
NonCanon	P43626	KIR2DL1	19	55285042	328	C	T	110	Q	X	-	DOID:1324 / lung cancer/MST	-	4780	S		NM_014218/-/['COSMIC', 'IntOGen', 'ICGC', 'TCGA']
NonCanon	P43626	KIR2DL1	19	55290069	670	C	A	224	P	T	benign	DOID:1324 / lung cancer/MST	Gain|Glycosylation	4780	S		NM_014218/-/['COSMIC', 'IntOGen', 'ICGC', 'TCGA']
NonCanon	P43626	KIR2DL1	19	55282321	55	G	T	19	A	S	benign	DOID:1324 / lung cancer/MST	-	4780	S		NM_014218/-/['IntOGen', 'COSMIC']
NonCanon	P43626	KIR2DL1	19	55286733	487	G	T	163	E	X	-	DOID:1324 / lung cancer/MST	-	4780	S		NM_014218/22980975/['COSMIC']
NonCanon	P43626	KIR2DL1	19	55290079	680	G	T	227	S	I	possibly damaging	DOID:1324 / lung cancer/MST	Gain|Glycosylation	4780	S		NM_014218/-/['IntOGen']
NonCanon	P43626	KIR2DL1	19	55286752	506	G	A	169	R	H	benign	DOID:1324 / lung cancer/MST	-	4780	S		NM_014218/-/['COSMIC', 'ICGC']
NonCanon	P43626	KIR2DL1	19	55285048	334	T	C	112	S	P	probably damaging	DOID:10534 / stomach cancer/MST	-	4780	S		NM_014218/-/['ICGC', 'TCGA']
NonCanon	P43626	KIR2DL1	19	55286823	577	G	A	193	G	R	possibly damaging	DOID:10534 / stomach cancer/MST	Gain|Phosphorylation	4780	S		NM_014218/-/['ICGC', 'TCGA']
NonCanon	P43626	KIR2DL1	19	55284925	211	C	T	71	R	C	benign	DOID:10534 / stomach cancer/MST	Loss|Binding Site	4780	S		NM_014218/-/['TCGA']
NonCanon	P43626	KIR2DL1	19	55284967	253	T	G	85	F	V	probably damaging	DOID:10534 / stomach cancer/MST	Loss|+1 from N-linked Glycosylation	4780	S		NM_014218/-/['ICGC', 'TCGA']
NonCanon	P43626	KIR2DL1	19	55285082	368	T	A	123	I	K	benign	DOID:11934 / head and neck cancer/MST	Gain|Phosphorylation	4780	S		NM_014218/-/['TCGA']
NonCanon	P43626	KIR2DL1	19	55286879	633	G	T	211	K	N	benign	DOID:11934 / head and neck cancer/MST	Gain|Glycosylation	4780	S		NM_014218/-/['TCGA']
NonCanon	P43626	KIR2DL1	19	55286721	475	C	T	159	H	Y	possibly damaging	DOID:11934 / head and neck cancer/MST	Gain|Phosphorylation	4780	S		NM_014218/-/['TCGA']
NonCanon	P43626	KIR2DL1	19	55284979	265	C	T	89	R	C	possibly damaging	DOID:11934 / head and neck cancer/MST	-	4780	S		NM_014218/-/['TCGA']
NonCanon	P43626	KIR2DL1	19	55281315	13	G	T	5	V	F	possibly damaging	DOID:219 / colon cancer/MST	-	4780	S		NM_014218/-/['COSMIC', 'ICGC', 'TCGA']
NonCanon	P43626	KIR2DL1	19	55284861	147	T	A	49	C	X	-	DOID:219 / colon cancer/MST	-	4780	S		NM_014218/-/['COSMIC']
NonCanon	P43626	KIR2DL1	19	55285027	313	A	C	105	T	P	benign	DOID:219 / colon cancer/MST	-	4780	S		NM_014218/-/['COSMIC']
NonCanon	P43626	KIR2DL1	19	55284926	212	G	A	71	R	H	benign	DOID:219 / colon cancer/MST	Loss|Binding Site	4780	S		NM_014218/-/['ICGC', 'TCGA']
NonCanon	P43626	KIR2DL1	19	55284980	266	G	A	89	R	H	benign	DOID:1319 / brain cancer/MST	Gain|Phosphorylation	4780	S		NM_014218/-/['IntOGen', 'COSMIC']
NonCanon	P43626	KIR2DL1	19	55284986	272	C	T	91	T	M	possibly damaging	DOID:1319 / brain cancer/MST	-	4780	S		NM_014218/-/['COSMIC', 'IntOGen']
NonCanon	P43626	KIR2DL1	19	55285075	361	G	A	121	V	M	probably damaging	DOID:1319 / brain cancer/MST	-	4780	S		NM_014218/-/['TCGA']
NonCanon	P43626	KIR2DL1	19	55285048	334	T	A	112	S	T	probably damaging	DOID:1319 / brain cancer/MST	-	4780	S		NM_014218/-/['ICGC', 'TCGA']
NonCanon	P43626	KIR2DL1	19	55282328	62	C	A	21	P	Q	probably damaging	DOID:5041 / esophageal cancer/MST	-	4780	S		NM_014218/23525077/['COSMIC']
NonCanon	P43626	KIR2DL1	19	55286872	626	G	A	209	W	X	-	DOID:5041 / esophageal cancer/MST	-	4780	S		NM_014218/23525077/['COSMIC']
NonCanon	P43626	KIR2DL1	19	55281318	16	G	A	6	V	I	benign	DOID:5041 / esophageal cancer/MST	-	4780	S		NM_014218/23525077/['COSMIC']
NonCanon	P43626	KIR2DL1	19	55285049	335	C	G	112	S	X	-	DOID:5041 / esophageal cancer/MST	-	4780	S		NM_014218/-/['ICGC']
NonCanon	P43626	KIR2DL1	19	55284949	235	G	A	79	G	R	benign	DOID:3571 / liver cancer/MST	Gain|Phosphorylation	4780	S		NM_014218/-/['TCGA']
NonCanon	P43626	KIR2DL1	19	55281312	10	T	A	4	L	M	benign	DOID:3571 / liver cancer/MST	-	4780	S		NM_014218/-/['COSMIC']
NonCanon	P43626	KIR2DL1	19	55284791	77	A	G	26	H	R	benign	DOID:3571 / liver cancer/MST	-	4780	S		NM_014218/-/['ICGC', 'COSMIC']
NonCanon	P43626	KIR2DL1	19	55281304	2	T	C	1	M	T	probably damaging	DOID:1521 / cecum cancer/MST	-	4780	S		NM_014218/-/['COSMIC']
NonCanon	P43626	KIR2DL1	19	55284926	212	G	A	71	R	H	benign	DOID:1521 / cecum cancer/MST	Loss|Binding Site	4780	S		NM_014218/-/['COSMIC']
NonCanon	P43626	KIR2DL1	19	55282321	55	G	A	19	A	T	benign	DOID:1793 / pancreatic cancer/MST	-	4780	S		NM_014218/-/['TCGA']
NonCanon	P43626	KIR2DL1	19	55284925	211	C	T	71	R	C	benign	DOID:1793 / pancreatic cancer/MST	Loss|Binding Site	4780	S		NM_014218/-/['TCGA']
NonCanon	P43626	KIR2DL1	19	55281315	13	G	T	5	V	F	possibly damaging	DOID:1793 / pancreatic cancer/MST	-	4780	S		NM_014218/-/['TCGA']
NonCanon	P43626	KIR2DL1	19	55285010	296	G	T	99	R	I	probably damaging	DOID:363 / uterine cancer/MST	Gain|Phosphorylation	4780	S		NM_014218/-/['TCGA', 'COSMIC']
NonCanon	P43626	KIR2DL1	19	55284950	236	G	T	79	G	V	probably damaging	DOID:363 / uterine cancer/MST	Gain|Phosphorylation	4780	S		NM_014218/-/['COSMIC', 'TCGA']
NonCanon	P43626	KIR2DL1	19	55285022	308	C	A	103	S	Y	probably damaging	DOID:363 / uterine cancer/MST	Gain|Phosphorylation	4780	S		NM_014218/-/['COSMIC', 'TCGA']
NonCanon	P43626	KIR2DL1	19	55284926	212	G	A	71	R	H	benign	DOID:1612 / breast cancer/MST	Loss|Binding Site	4780	S		NM_014218/-/['COSMIC', 'IntOGen', 'ICGC', 'TCGA']
NonCanon	P43626	KIR2DL1	19	55285010	296	G	T	99	R	I	probably damaging	DOID:1612 / breast cancer/MST	Gain|Phosphorylation	4780	S		NM_014218/22722201/['COSMIC']	NM_014218/-/['IntOGen', 'ICGC']
NonCanon	P43626	KIR2DL1	19	55281315	13	G	T	5	V	F	possibly damaging	DOID:1612 / breast cancer/MST	-	4780	S		NM_014218/-/['COSMIC']
NonCanon	P43626	KIR2DL1	19	55284901	187	G	C	63	E	Q	possibly damaging	DOID:1612 / breast cancer/MST	-	4780	S		NM_014218/-/['COSMIC', 'ICGC', 'TCGA']
NonCanon	P43626	KIR2DL1	19	55286822	576	C	A	192	H	Q	benign	DOID:4362 / cervical cancer/MST	-	4780	S		NM_014218/-/['TCGA']
NonCanon	P43626	KIR2DL1	19	55284986	272	C	T	91	T	M	possibly damaging	DOID:4362 / cervical cancer/MST	-	4780	S		NM_014218/-/['TCGA']
NonCanon	P43626	KIR2DL1	19	55285082	368	T	A	123	I	K	benign	DOID:0060119 / pharynx cancer/MST	Gain|Phosphorylation	4780	S		NM_014218/-/['IntOGen']
NonCanon	P43626	KIR2DL1	19	55286879	633	G	T	211	K	N	benign	DOID:0060119 / pharynx cancer/MST	Gain|Glycosylation	4780	S		NM_014218/-/['IntOGen']
NonCanon	P43626	KIR2DL1	19	55284986	272	C	T	91	T	M	possibly damaging	DOID:3070 / malignant glioma/MST	-	4780	S		NM_014218/-/['ICGC', 'TCGA']
NonCanon	P43626	KIR2DL1	19	55284980	266	G	A	89	R	H	benign	DOID:3070 / malignant glioma/MST	Gain|Phosphorylation	4780	S		NM_014218/-/['ICGC', 'TCGA']
NonCanon	P43626	KIR2DL1	19	55286733	487	G	A	163	E	K	probably damaging	DOID:263 / kidney cancer/MST	-	4780	S		NM_014218/23797736/['COSMIC']
NonCanon	P43626	KIR2DL1	19	55285024	310	G	C	104	V	L	benign	DOID:263 / kidney cancer/MST	Gain|Phosphorylation	4780	S		NM_014218/-/['TCGA']
NonCanon	P43626	KIR2DL1	19	55286722	476	A	G	159	H	R	possibly damaging	DOID:2531 / hematologic cancer/MST	Gain|Phosphorylation	4780	S		NM_014218/21796119/['COSMIC']
NonCanon	P43626	KIR2DL1	19	55286871	625	T	A	209	W	R	probably damaging	DOID:2531 / hematologic cancer/MST	-	4780	S		NM_014218/-/['ICGC']
NonCanon	P43626	KIR2DL1	19	55284980	266	G	A	89	R	H	benign	DOID:10283 / prostate cancer/MST	Gain|Phosphorylation	4780	S		NM_014218/22610119/['COSMIC']
NonCanon	P43626	KIR2DL1	19	55284917	203	A	T	68	D	V	possibly damaging	DOID:10283 / prostate cancer/MST	Gain|Phosphorylation	4780	S		NM_014218/-/['TCGA']
NonCanon	P43626	KIR2DL1	19	55286739	493	G	A	165	E	K	possibly damaging	DOID:11054 / urinary bladder cancer/MST	-	4780	S		NM_014218/-/['IntOGen', 'ICGC', 'COSMIC', 'TCGA']
NonCanon	P43626	KIR2DL1	19	55286648	402	G	T	134	Q	H	probably damaging	DOID:3953 / adrenal gland cancer/MST	Gain|Phosphorylation	4780	S		NM_014218/-/['TCGA']
NonCanon	P43626	KIR2DL1	19	55284980	266	G	A	89	R	H	benign	DOID:1993 / rectum cancer/MST	Gain|Phosphorylation	4780	S		NM_014218/-/['COSMIC', 'ICGC', 'TCGA']
NonCanon	Q9UQP3	TNN	1	175067474	1862	A	G	621	D	G	probably damaging	DOID:219 / colon cancer/HERV9	-	6114	GE	HERVW9	NM_022093/-/['IntOGen']
NonCanon	Q9UQP3	TNN	1	175067497	1885	G	T	629	D	Y	probably damaging	DOID:219 / colon cancer/HERV9	Gain|Phosphorylation	6114	GE	HERVW9	NM_022093/17932254/['COSMIC']
NonCanon	Q9UQP3	TNN	1	175067721	2109	G	T	703	K	N	possibly damaging	DOID:219 / colon cancer/HERV9	-	6114	GE	HERVW9	NM_022093/-/['ICGC', 'COSMIC', 'TCGA']
NonCanon	Q9UQP3	TNN	1	175067535	1923	C	A	641	D	E	possibly damaging	DOID:219 / colon cancer/HERV9	-	6114	GE	HERVW9	NM_022093/-/['COSMIC']
NonCanon	Q9UQP3	TNN	1	175067501	1889	G	A	630	R	Q	benign	DOID:1324 / lung cancer/HERV9	-	6114	GE	HERVW9	NM_022093/-/['IntOGen']	NM_022093/22941188/['COSMIC']
NonCanon	Q9UQP3	TNN	1	175067651	2039	C	A	680	P	Q	probably damaging	DOID:1324 / lung cancer/HERV9	Loss|Binding Site	6114	GE	HERVW9	NM_022093/-/['COSMIC', 'IntOGen']
NonCanon	Q9UQP3	TNN	1	175067548	1936	G	A	646	A	T	benign	DOID:1324 / lung cancer/HERV9	Gain|Phosphorylation	6114	GE	HERVW9	NM_022093/-/['IntOGen', 'ICGC', 'TCGA', 'COSMIC']
NonCanon	Q9UQP3	TNN	1	175067601	1989	G	C	663	E	D	benign	DOID:1324 / lung cancer/HERV9	Gain|Phosphorylation	6114	GE	HERVW9	NM_022093/22980975/['COSMIC']
NonCanon	Q9UQP3	TNN	1	175067533	1921	G	C	641	D	H	probably damaging	DOID:1324 / lung cancer/HERV9	Gain|Phosphorylation	6114	GE	HERVW9	NM_022093/-/['COSMIC', 'ICGC']
NonCanon	Q9UQP3	TNN	1	175067674	2062	G	T	688	V	L	probably damaging	DOID:1324 / lung cancer/HERV9	-	6114	GE	HERVW9	NM_022093/-/['COSMIC']
NonCanon	Q9UQP3	TNN	1	175067519	1907	C	A	636	A	D	probably damaging	DOID:363 / uterine cancer/HERV9	Gain|Phosphorylation	6114	GE	HERVW9	NM_022093/-/['TCGA', 'COSMIC']
NonCanon	Q9UQP3	TNN	1	175067489	1877	T	C	626	L	P	probably damaging	DOID:363 / uterine cancer/HERV9	-	6114	GE	HERVW9	NM_022093/-/['COSMIC', 'TCGA']
NonCanon	Q9UQP3	TNN	1	175067695	2083	C	T	695	Q	X	-	DOID:4159 / skin cancer/HERV9	-	6114	GE	HERVW9	NM_022093/-/['TCGA']
NonCanon	Q9UQP3	TNN	1	175067711	2099	C	T	700	A	V	benign	DOID:4159 / skin cancer/HERV9	Loss|Binding Site	6114	GE	HERVW9	NM_022093/-/['ICGC', 'TCGA']
NonCanon	Q9UQP3	TNN	1	175067612	2000	G	A	667	G	E	possibly damaging	DOID:4159 / skin cancer/HERV9	-	6114	GE	HERVW9	NM_022093/-/['ICGC', 'TCGA']
NonCanon	Q9UQP3	TNN	1	175067702	2090	G	A	697	S	N	probably damaging	DOID:4159 / skin cancer/HERV9	Loss|Binding Site	6114	GE	HERVW9	NM_022093/-/['ICGC', 'TCGA']
NonCanon	Q9UQP3	TNN	1	175067689	2077	G	A	693	G	R	probably damaging	DOID:4159 / skin cancer/HERV9	-	6114	GE	HERVW9	NM_022093/21984974/['COSMIC']
NonCanon	Q9UQP3	TNN	1	175067563	1951	G	A	651	V	M	benign	DOID:10534 / stomach cancer/HERV9	Gain|Phosphorylation	6114	GE	HERVW9	NM_022093/-/['ICGC', 'TCGA']
NonCanon	Q9UQP3	TNN	1	175067511	1899	G	C	633	E	D	probably damaging	DOID:10534 / stomach cancer/HERV9	-	6114	GE	HERVW9	NM_022093/-/['ICGC', 'TCGA']
NonCanon	Q9UQP3	TNN	1	175067636	2024	T	C	675	L	P	probably damaging	DOID:10534 / stomach cancer/HERV9	-	6114	GE	HERVW9	NM_022093/-/['ICGC', 'TCGA']
NonCanon	Q9UQP3	TNN	1	175067522	1910	C	T	637	T	M	probably damaging	DOID:10534 / stomach cancer/HERV9	-	6114	GE	HERVW9	NM_022093/-/['ICGC', 'TCGA']
NonCanon	Q9UQP3	TNN	1	175067683	2071	C	A	691	Q	K	benign	DOID:11934 / head and neck cancer/HERV9	-	6114	GE	HERVW9	NM_022093/-/['TCGA']
NonCanon	Q9UQP3	TNN	1	175067479	1867	C	G	623	P	A	probably damaging	DOID:11934 / head and neck cancer/HERV9	Gain|Phosphorylation	6114	GE	HERVW9	NM_022093/-/['TCGA']
NonCanon	Q9UQP3	TNN	1	175067630	2018	C	G	673	T	R	probably damaging	DOID:11934 / head and neck cancer/HERV9	-	6114	GE	HERVW9	NM_022093/-/['TCGA']
NonCanon	Q9UQP3	TNN	1	175067630	2018	C	G	673	T	R	probably damaging	DOID:0060119 / pharynx cancer/HERV9	-	6114	GE	HERVW9	NM_022093/-/['IntOGen']
NonCanon	Q9UQP3	TNN	1	175067683	2071	C	A	691	Q	K	benign	DOID:0060119 / pharynx cancer/HERV9	-	6114	GE	HERVW9	NM_022093/-/['IntOGen']
NonCanon	Q9UQP3	TNN	1	175067603	1991	T	C	664	V	A	benign	DOID:263 / kidney cancer/HERV9	Gain|Phosphorylation	6114	GE	HERVW9	NM_022093/23797736/['COSMIC']
NonCanon	Q9UQP3	TNN	1	175067674	2062	G	A	688	V	M	probably damaging	DOID:1612 / breast cancer/HERV9	-	6114	GE	HERVW9	NM_022093/-/['ICGC']
NonCanon	Q9UQP3	TNN	1	175067673	2061	C	A	687	H	Q	benign	DOID:1612 / breast cancer/HERV9	-	6114	GE	HERVW9	NM_022093/-/['COSMIC', 'ICGC', 'TCGA']
NonCanon	Q9UQP3	TNN	1	175067474	1862	A	G	621	D	G	probably damaging	DOID:1993 / rectum cancer/HERV9	-	6114	GE	HERVW9	NM_022093/-/['COSMIC']
NonCanon	Q9UQP3	TNN	1	175067473	1861	G	C	621	D	H	probably damaging	DOID:11054 / urinary bladder cancer/HERV9	-	6114	GE	HERVW9	NM_022093/-/['IntOGen', 'COSMIC']
NonCanon	Q9UQP3	TNN	1	175067659	2047	G	T	683	E	X	-	DOID:11054 / urinary bladder cancer/HERV9	-	6114	GE	HERVW9	NM_022093/-/['IntOGen', 'COSMIC']
NonCanon	Q9UQP3	TNN	1	175067653	2041	G	T	681	G	C	probably damaging	DOID:1793 / pancreatic cancer/HERV9	-	6114	GE	HERVW9	NM_022093/-/['ICGC']
NonCanon	Q9UQP3	TNN	1	175067705	2093	A	C	698	K	T	probably damaging	DOID:5041 / esophageal cancer/HERV9	Gain|Phosphorylation	6114	GE	HERVW9	NM_022093/23525077/['COSMIC']
NonCanon	Q9UQP3	TNN	1	175067522	1910	C	T	637	T	M	probably damaging	DOID:2531 / hematologic cancer/HERV9	-	6114	GE	HERVW9	NM_022093/22237106/['COSMIC']
