# Supplementary material for: Investigation of somatic single nucleotide variations in human endogenous retrovirus elements and their potential association with cancer
Source: PLoS One. 2019 Apr 1;14(4):e0213770. doi: 10.1371/journal.pone.0213770 (PMC6443178; doi:10.1371/journal.pone.0213770)
Supplement: S10 Table — (XLSX) [file pone.0213770.s012.xlsx]

## Sheet: Sheet1
HERV_sequence	Chrmosome	Genome_Pos	Ref_N	Var_N	DOID /Cancer type /HERV group	HERV Genus	HERV_id	Mutation_ID	Info_ICGC
Canon	7	82268074	G	C	DOID:1324 / lung cancer/HERV9	GE	2542	MU51193955		intergenic_region
Canon	10	107782624	G	A	DOID:4159 / skin cancer/HERVH	GE	3349	MU39435873		intergenic_region
Canon	5	18542968	C	T	DOID:4159 / skin cancer/HERVH	GE	1766	MU60542380		intergenic_region
Canon	7	145749804	C	T	DOID:4159 / skin cancer/HERVADP	GE	2666	MU41418099		intergenic_region
Canon	3	161875610	A	T	DOID:10283 / prostate cancer/HERVH	GE	1199	MU60035034		intergenic_region
Canon	8	39739915	C	T	DOID:1324 / lung cancer/HERV9	GE	2772	MU55528459		intergenic_region
Canon	8	39704454	G	A	DOID:4159 / skin cancer/HERVIP	GE	2773	MU39874057		intergenic_region
Canon	9	118605429	C	G	DOID:1324 / lung cancer/HERVH	GE	3151	MU51408814		intergenic_region
Canon	4	64058337	T	C	DOID:2531 / hematologic cancer/HERV9	GE	1426	MU261841		intergenic_region
Canon	7	120419055	C	T	DOID:1319 / brain cancer/HERVH	GE	2611	MU67735584		intergenic_region
Canon	2	81106929	G	A	DOID:1612 / breast cancer/HERVH	GE	591	MU40545928		intergenic_region
Canon	2	116942717	C	T	DOID:1324 / lung cancer/HERVH	GE	655	MU41851440		intergenic_region
Canon	10	42885770	G	A	DOID:4159 / skin cancer/HERVFA	GE	3231	MU57976218		intergenic_region
Canon	3	164062634	C	T	DOID:4159 / skin cancer/HERVH	GE	1212	MU36145535		intergenic_region
Canon	2	79321089	G	A	DOID:4159 / skin cancer/HERVH48	GE	587	MU57999491		intergenic_region
Canon	3	103313595	C	T	DOID:4159 / skin cancer/HERVL	S	1049	MU55455844		intergenic_region
Canon	8	91102314	A	G	DOID:3571 / liver cancer/HERVH	GE	2897	MU3141205	CALB1	intron_variant
Canon	2	115876280	C	T	DOID:4159 / skin cancer/MER50	GE	654	MU56467063	DPP10	intron_variant
Canon	2	195000185	G	A	DOID:4159 / skin cancer/HERVH	GE	780	MU53985869		intergenic_region
Canon	11	29543358	C	T	DOID:4159 / skin cancer/HERV3	GE	3431	MU49853095	RP11-460B17.3	intron_variant
Canon	11	6090597	G	A	DOID:4159 / skin cancer/HERVH	GE	3393	MU58742627		intergenic_region
Canon	6	87183611	C	T	DOID:4159 / skin cancer/HERVT	GE	2248	MU49818348		intergenic_region
Canon	5	18540364	G	T	DOID:3571 / liver cancer/HERVH	GE	1766	MU31377348		intergenic_region
Canon	19	24507757	A	G	DOID:4159 / skin cancer/HML8	AB	4687	MU57735821		intergenic_region
Canon	5	113109295	C	T	DOID:4159 / skin cancer/HERV4	GE	1950	MU61389367		intergenic_region
Canon	8	54378097	G	A	DOID:4159 / skin cancer/HERV9	GE	2824	MU44257639		intergenic_region
Canon	13	91495749	G	A	DOID:3571 / liver cancer/HERVH	GE	4039	MU70101305		intergenic_region
Canon	7	118829948	G	T	DOID:5041 / esophageal cancer/HERVL	S	2605	MU417960		intergenic_region
Canon	7	85371207	A	C	DOID:4159 / skin cancer/HERVIP	GE	2547	MU35154172		intergenic_region
Canon	3	172878306	G	A	DOID:4159 / skin cancer/HERVH	GE	1237	MU46177272	RP11-324C10.1	intron_variant
Canon	3	162433625	G	A	DOID:4159 / skin cancer/HERVH	GE	1202	MU40614982		intergenic_region
Canon	10	59597299	G	A	DOID:4159 / skin cancer/HERV9	GE	3269	MU44193931		intergenic_region
Canon	1	188308383	G	A	DOID:1793 / pancreatic cancer/HERVL	S	6135	MU69179570		intergenic_region
Canon	4	59160171	C	T	DOID:5041 / esophageal cancer/HERVH	GE	1414	MU20194467		intergenic_region
Canon	8	132755806	C	T	DOID:4159 / skin cancer/HERVH	GE	2963	MU49245041		intergenic_region
Canon	2	148070024	A	G	DOID:3571 / liver cancer/HERV9	GE	702	MU51550353		intergenic_region
Canon	13	87412802	G	T	DOID:5041 / esophageal cancer/HERVFB	GE	4023	MU27106818		intergenic_region
Canon	19	20658489	G	A	DOID:1324 / lung cancer/HERVH48	GE	4644	MU54797738	CTC-513N18.6	intron_variant
Canon	16	35140689	G	A	DOID:1612 / breast cancer/HERVH	GE	4379	MU66599060		intergenic_region
Canon	13	104863778	C	T	DOID:2531 / hematologic cancer/HERVH	GE	4055	MU68946953		intergenic_region
Canon	5	32677874	C	T	DOID:4159 / skin cancer/HERV9	GE	1799	MU61435227		intergenic_region
Canon	10	42885116	G	A	DOID:4159 / skin cancer/HERVFA	GE	3231	MU33290172		intergenic_region
Canon	13	55632872	C	T	DOID:1612 / breast cancer/HERVW	GE	3967	COSN21354434	.	.
Canon	11	39151269	C	G	DOID:1612 / breast cancer/HERVL	S	3445	MU65521594		intergenic_region
Canon	4	137535719	C	T	DOID:4159 / skin cancer/HERVH	GE	1629	MU57896946		intergenic_region
Canon	4	168345334	C	T	DOID:4159 / skin cancer/HUERSP3	GE	1690	MU45094637		intergenic_region
Canon	19	20481039	C	T	DOID:4159 / skin cancer/HERVT	GE	4639	MU60240587	ZNF826P	intron_variant
Canon	4	128196084	C	T	DOID:4159 / skin cancer/HML3	AB	1593	MU53177727	RP11-125O18.1	intron_variant
Canon	19	55409234	G	C	DOID:1612 / breast cancer/HERVH	GE	4783	MU66502161		intergenic_region
Canon	13	55271589	G	A	DOID:10283 / prostate cancer/MER52	GE	3965	MU29332038		intergenic_region
Canon	4	64056463	C	A	DOID:4159 / skin cancer/HERV9	GE	1426	MU51938928		intergenic_region
Canon	2	41728384	G	T	DOID:4159 / skin cancer/HUERSP3	GE	521	MU35283408		intergenic_region
Canon	5	3952334	C	G	DOID:1324 / lung cancer/HERVL	S	1746	MU50907022		intergenic_region
Canon	1	71970855	G	A	DOID:4159 / skin cancer/HERVADP	GE	5921	MU67914944	NEGR1	intron_variant
Canon	3	164053563	A	T	DOID:5041 / esophageal cancer/HERVT	GE	1211	MU23496385		intergenic_region
Canon	2	76102901	C	T	DOID:1793 / pancreatic cancer/HERVW	GE	577	MU7098630		intergenic_region
Canon	8	5297041	G	A	DOID:4159 / skin cancer/HERVH	GE	2687	MU44154446		intergenic_region
Canon	8	84422171	C	T	DOID:3571 / liver cancer/HERVH	GE	2876	MU1118120		intergenic_region
Canon	6	63503371	C	T	DOID:4159 / skin cancer/HERVH	GE	2167	MU49050680		intergenic_region
Canon	4	135450759	G	A	DOID:4159 / skin cancer/HEPSI1	GE	1621	MU42675580		intergenic_region
Canon	2	143250341	G	T	DOID:1324 / lung cancer/HERVH	GE	697	MU47836327		intergenic_region
Canon	3	102457887	G	A	DOID:3571 / liver cancer/HERVS	S	1046	MU3816646		intergenic_region
Canon	3	147597817	T	C	DOID:2531 / hematologic cancer/HUERSP2	GE	1159	MU56360308		intergenic_region
Canon	6	119715630	G	T	DOID:3571 / liver cancer/MER52	GE	2310	COSN14895575	.	SNP
Canon	5	45799634	C	T	DOID:4159 / skin cancer/MER52	GE	1834	MU45946621		intergenic_region
Canon	3	146081015	G	A	DOID:4159 / skin cancer/HERVH	GE	1155	MU57944216		intergenic_region
Canon	8	43412127	T	A	DOID:4159 / skin cancer/HERVT	GE	2781	MU60438837		intergenic_region
Canon	3	97965813	G	A	DOID:1793 / pancreatic cancer/HERVH	GE	1036	MU8549746	RP11-325B23.2	intron_variant
Canon	2	124256173	C	A	DOID:1324 / lung cancer/HERVL	S	667	MU56246025		intergenic_region
Canon	2	115069994	G	A	DOID:4159 / skin cancer/HERVL	S	653	MU60611355		intergenic_region
Canon	7	85718539	G	A	DOID:4159 / skin cancer/HERVL	S	2548	MU58782434		intergenic_region
Canon	4	35342546	G	A	DOID:4159 / skin cancer/HERVL	S	1370	MU41216187		intergenic_region
Canon	7	82268445	G	A	DOID:4159 / skin cancer/HERV9	GE	2542	MU33081011		intergenic_region
Canon	2	81883757	C	A	DOID:3571 / liver cancer/HERVIP	GE	593	MU2743896		intergenic_region
Canon	6	62311264	G	A	DOID:4159 / skin cancer/HERVH	GE	2164	MU56117312		intergenic_region
Canon	1	71968158	C	T	DOID:4159 / skin cancer/HERVADP	GE	5921	MU54839873	NEGR1	intron_variant
Canon	5	32673638	G	A	DOID:4159 / skin cancer/HERV9	GE	1799	MU48674987		intergenic_region
Canon	5	13200757	G	A	DOID:4159 / skin cancer/HERVL	S	1761	MU57825497		intergenic_region
Canon	6	78371522	G	A	DOID:4159 / skin cancer/HERVH	GE	2213	MU51714932		intergenic_region
Canon	19	20683096	T	G	DOID:4159 / skin cancer/HML8	AB	4642	MU44544908	CTC-513N18.6	intron_variant
Canon	8	132754083	A	C	DOID:5041 / esophageal cancer/HERVH	GE	2963	MU545426		intergenic_region
Canon	7	138052648	C	T	DOID:4159 / skin cancer/HERVH	GE	2645	MU50569800		intergenic_region
Canon	10	59593853	G	A	DOID:4159 / skin cancer/HERV9	GE	3269	MU61366997		intergenic_region
Canon	3	483660	G	A	DOID:4159 / skin cancer/HERVL	S	848	MU61651552		intergenic_region
Canon	6	57628081	C	T	DOID:4159 / skin cancer/HML2	AB	2153	MU57649887		intergenic_region
Canon	19	21855087	G	A	DOID:4159 / skin cancer/HML3	AB	4659	MU43493070		intergenic_region
Canon	1	181224146	C	G	DOID:1612 / breast cancer/HML8	AB	6122	MU66847790		intergenic_region
Canon	5	103929830	G	T	DOID:10283 / prostate cancer/HERVFA	GE	1928	MU54043289	RP11-6N13.1	intron_variant
Canon	14	27589751	C	T	DOID:4159 / skin cancer/HERVL	S	4091	MU48505284	RP11-384J4.2	intron_variant
Canon	2	189770321	G	C	DOID:1612 / breast cancer/HERVL	S	775	COSN22263187	.	.
Canon	12	61346779	C	A	DOID:1612 / breast cancer/HERVH	GE	3816	MU66056515		intergenic_region
Canon	5	3951109	G	C	DOID:3571 / liver cancer/HERVL	S	1746	MU1139461		intergenic_region
Canon	2	143249844	G	A	DOID:4159 / skin cancer/HERVH	GE	697	MU50119545		intergenic_region
Canon	12	114500171	C	T	DOID:4159 / skin cancer/HERVH	GE	3903	MU71412461		intergenic_region
Canon	6	123903493	G	A	DOID:3571 / liver cancer/HERVH	GE	2325	MU2764050	TRDN	intron_variant
Canon	3	35921264	G	A	DOID:4159 / skin cancer/HERVH	GE	917	MU61830016		intergenic_region
Canon	6	95264118	A	G	DOID:4159 / skin cancer/HERVH	GE	2263	MU42339663		intergenic_region
Canon	10	84819099	C	T	DOID:3571 / liver cancer/HERVH	GE	3305	MU1092500		intergenic_region
Canon	21	18286646	A	G	DOID:3571 / liver cancer/HERVH	GE	4867	MU5748726		intergenic_region
Canon	12	34424950	C	T	DOID:4159 / skin cancer/HERVH	GE	3760	MU38378401		intergenic_region
Canon	2	79323437	G	A	DOID:4159 / skin cancer/HERVH48	GE	587	MU58981842		intergenic_region
Canon	5	28048345	A	T	DOID:8618 / oral cavity cancer/HERVH	GE	1788	MU67371845		intergenic_region
Canon	9	23924327	G	A	DOID:1793 / pancreatic cancer/HERV9	GE	3020	MU30896990		intergenic_region
Canon	11	81523633	G	A	DOID:4159 / skin cancer/HERVH	GE	3562	MU46483939		intergenic_region
Canon	7	82269001	A	C	DOID:2531 / hematologic cancer/HERV9	GE	2542	MU68094636		intergenic_region
Canon	19	20893890	C	T	DOID:4159 / skin cancer/HML1	AB	4647	MU61117447		intergenic_region
Canon	13	104860472	G	A	DOID:4159 / skin cancer/HERVH	GE	4055	MU45234675		intergenic_region
Canon	3	97967051	C	T	DOID:1612 / breast cancer/HERVH	GE	1036	MU65406659	RP11-325B23.2	intron_variant
Canon	10	84820602	T	C	DOID:5041 / esophageal cancer/HERVH	GE	3305	MU70893681		intergenic_region
Canon	5	129975849	G	A	DOID:4159 / skin cancer/HERV9	GE	1989	MU42603427		intergenic_region
Canon	4	136090662	G	A	DOID:4159 / skin cancer/HERVH	GE	1624	MU56072527		intergenic_region
Canon	5	62861733	G	T	DOID:3571 / liver cancer/HUERSP2	GE	1864	COSN5608864	.	.
Canon	11	96237372	C	T	DOID:4159 / skin cancer/LTR46	GE	3609	MU39985724	JRKL-AS1	intron_variant
Canon	8	73304092	G	T	DOID:10283 / prostate cancer/HERV9	GE	2860	MU32000218		intergenic_region
Canon	3	148136481	C	T	DOID:4159 / skin cancer/HERVH	GE	1162	MU57349569		intergenic_region
Canon	4	45535703	C	T	DOID:4159 / skin cancer/HERV9	GE	1392	MU46160674		intergenic_region
Canon	11	80909789	C	T	DOID:4159 / skin cancer/HERVADP	GE	3558	MU46469753		intergenic_region
Canon	11	29545213	C	T	DOID:4159 / skin cancer/HERV3	GE	3431	MU62551232	RP11-460B17.3	intron_variant
Canon	12	17454433	G	A	DOID:4159 / skin cancer/HERVE	GE	3723	MU61392165		intergenic_region
Canon	11	38246769	C	T	DOID:4159 / skin cancer/HERVIP	GE	3442	MU33432566		intergenic_region
Canon	12	78872046	G	A	DOID:4159 / skin cancer/HERVIP	GE	3846	MU41041314	RP11-171L9.1	intron_variant
Canon	4	35343082	G	A	DOID:1612 / breast cancer/HERVL	S	1370	MU66448368		intergenic_region
Canon	11	6095165	G	A	DOID:4159 / skin cancer/HERVH	GE	3393	MU60912773		intergenic_region
Canon	7	85717549	G	A	DOID:4159 / skin cancer/HERVL	S	2548	MU53297184		intergenic_region
Canon	4	134869470	G	A	DOID:5041 / esophageal cancer/HERVADP	GE	1617	MU17867304	RP11-427M20.1	intron_variant
Canon	5	100652164	A	G	DOID:1324 / lung cancer/HERVH	GE	1922	MU41259018		intergenic_region
Canon	7	54518670	A	G	DOID:5041 / esophageal cancer/HML3	AB	2498	MU33509102		intergenic_region
Canon	8	73307012	C	T	DOID:4159 / skin cancer/HERV9	GE	2860	MU62665785		intergenic_region
Canon	13	91492740	C	T	DOID:4159 / skin cancer/HERVH	GE	4039	MU38866678		intergenic_region
Canon	6	103079992	C	T	DOID:4159 / skin cancer/MER51	GE	2277	MU32810731		intergenic_region
Canon	6	57621478	C	G	DOID:2531 / hematologic cancer/HML2	AB	2153	MU69222294		intergenic_region
Canon	11	91332565	G	A	DOID:4159 / skin cancer/HERVL	S	3592	MU37088239		intergenic_region
Canon	11	96233707	C	T	DOID:1324 / lung cancer/LTR46	GE	3609	MU50976265	JRKL-AS1	intron_variant
Canon	1	188638607	C	T	DOID:4159 / skin cancer/HERVFRD	GE	6139	MU54184653		intergenic_region
Canon	5	135905850	G	A	DOID:4159 / skin cancer/HERVH	GE	2000	MU48378160		intergenic_region
Canon	6	63301138	C	T	DOID:4159 / skin cancer/HERVH	GE	2166	MU59271523		intergenic_region
Canon	11	80913381	G	A	DOID:4159 / skin cancer/HERVADP	GE	3558	MU41668475		intergenic_region
Canon	18	27717430	T	G	DOID:4159 / skin cancer/MER51	GE	4529	MU41407036		intergenic_region
Canon	13	90312485	G	A	DOID:4159 / skin cancer/PABL	GE	4034	MU44413876		intergenic_region
Canon	3	167147095	C	T	DOID:4159 / skin cancer/HERVH	GE	1225	MU34863530		intergenic_region
Canon	4	59175646	C	T	DOID:4159 / skin cancer/HERV9	GE	1413	MU41898018		intergenic_region
Canon	10	59594129	G	A	DOID:4159 / skin cancer/HERV9	GE	3269	MU48471599		intergenic_region
Canon	16	35143509	G	A	DOID:4159 / skin cancer/HERVH	GE	4379	MU59480834		intergenic_region
Canon	4	168341387	G	T	DOID:3571 / liver cancer/HUERSP3	GE	1690	COSN15677101	.	.
Canon	14	40364034	G	A	DOID:4159 / skin cancer/HERVL	S	4116	MU47439372		intergenic_region
Canon	12	114502925	C	A	DOID:8618 / oral cavity cancer/HERVIP	GE	3905	MU67418080		intergenic_region
Canon	19	55410996	G	A	DOID:4159 / skin cancer/HERVH	GE	4783	MU58996839		intergenic_region
Canon	5	96651018	C	T	DOID:4159 / skin cancer/HERV9	GE	1909	MU50955352	RP11-155G15.2	intron_variant
Canon	11	49346665	T	C	DOID:1793 / pancreatic cancer/HERVH	GE	3466	MU29853724	CTD-2026G22.1	intron_variant
Canon	12	61348881	G	A	DOID:4159 / skin cancer/HERVH	GE	3816	MU60669522		intergenic_region
Canon	1	82821791	G	A	DOID:4159 / skin cancer/HERVH	GE	5945	MU61361986		intergenic_region
Canon	10	54714585	G	A	DOID:4159 / skin cancer/HERVT	GE	3253	MU34063936		intergenic_region
Canon	12	21108177	C	T	DOID:4159 / skin cancer/HUERSP3	GE	3732	MU63016252	LST3	intron_variant
Canon	4	64054934	A	T	DOID:263 / kidney cancer/HERV9	GE	1426	MU4177398		intergenic_region
Canon	7	118825280	C	T	DOID:4159 / skin cancer/HERVL	S	2605	MU51348455		intergenic_region
Canon	4	138403167	G	A	DOID:5041 / esophageal cancer/HERVE	GE	1632	MU35319005		intergenic_region
Canon	8	47493715	G	A	DOID:4159 / skin cancer/HML8	AB	2797	MU62830373	ASNSP1	intron_variant
Canon	11	101084164	C	T	DOID:4159 / skin cancer/HML8	AB	3621	MU47621338		intergenic_region
Canon	3	176225727	C	T	DOID:4159 / skin cancer/HUERSP3	GE	1247	MU48405853		intergenic_region
Canon	2	81883275	G	A	DOID:4159 / skin cancer/HERVIP	GE	593	MU44346735		intergenic_region
Canon	10	59593637	C	T	DOID:4159 / skin cancer/HERV9	GE	3269	MU60131610		intergenic_region
Canon	12	127966901	C	T	DOID:3571 / liver cancer/HERVE	GE	3915	MU3214982		intergenic_region
Canon	4	128437226	G	C	DOID:1612 / breast cancer/HERVH	GE	1594	MU66418219		intergenic_region
Canon	21	17352687	G	A	DOID:4159 / skin cancer/HERVH	GE	4864	MU57026579		intergenic_region
Canon	7	88174679	C	T	DOID:4159 / skin cancer/HUERSP3	GE	2552	MU56910379		intergenic_region
Canon	4	139544982	C	T	DOID:4159 / skin cancer/HERVW	GE	1636	MU45989902		intergenic_region
Canon	21	14428370	G	A	DOID:4159 / skin cancer/HERVIP	GE	4858	MU58509086	ANKRD30BP2	intron_variant
Canon	9	118605714	G	A	DOID:2531 / hematologic cancer/HERVH	GE	3151	MU45389007		intergenic_region
Canon	2	79441512	A	G	DOID:4159 / skin cancer/HERVH	GE	588	MU49275775	CTNNA2	intron_variant
Canon	8	69802762	A	G	DOID:4159 / skin cancer/HML3	AB	2850	MU43237091		intergenic_region
Canon	6	72458392	G	A	DOID:4159 / skin cancer/HERVH	GE	2199	MU39805754		intergenic_region
Canon	12	114501061	A	G	DOID:5041 / esophageal cancer/HERVH	GE	3903	MU18434060		intergenic_region
Canon	4	64051751	C	A	DOID:1612 / breast cancer/HERV9	GE	1426	COSN21054947	.	.
Canon	11	101084514	C	T	DOID:4159 / skin cancer/HML8	AB	3621	MU46183115		intergenic_region
Canon	4	135451148	C	T	DOID:4159 / skin cancer/HEPSI1	GE	1621	MU45904867		intergenic_region
Canon	2	115070362	G	A	DOID:4159 / skin cancer/HERVL	S	653	MU54309153		intergenic_region
Canon	14	82530367	G	A	DOID:3571 / liver cancer/HERVH	GE	4192	MU28879798		intergenic_region
Canon	13	56687943	G	A	DOID:4159 / skin cancer/HERVH	GE	3972	MU57135399		intergenic_region
Canon	8	91103690	G	A	DOID:4159 / skin cancer/HERVH	GE	2897	MU47114903	CALB1	intron_variant
Canon	8	64835932	G	A	DOID:4159 / skin cancer/HERVL	S	2844	MU33205839	RP11-32K4.1	intron_variant
Canon	2	76099619	G	C	DOID:1793 / pancreatic cancer/HERVW	GE	577	MU30372323		intergenic_region
Canon	8	54379974	G	A	DOID:4159 / skin cancer/HERV9	GE	2824	MU53608176		intergenic_region
Canon	11	91331758	G	A	DOID:4159 / skin cancer/HERVL	S	3592	MU59926310		intergenic_region
Canon	7	54029272	A	T	DOID:4159 / skin cancer/HERV9	GE	2496	MU46010675		intergenic_region
Canon	10	42887738	G	A	DOID:4159 / skin cancer/HERVFA	GE	3231	MU48038664		intergenic_region
Canon	10	107781614	G	A	DOID:4159 / skin cancer/HERVH	GE	3349	MU54485087		intergenic_region
Canon	18	57405155	C	T	DOID:5041 / esophageal cancer/ERV1_ARTIODACT	GE	4572	MU471476		intergenic_region
Canon	8	91423975	G	A	DOID:4159 / skin cancer/HERVL	S	2898	MU53944986	LINC00534	intron_variant
Canon	14	80695881	C	T	DOID:4159 / skin cancer/HERVL	S	4189	MU54219916	DIO2	intron_variant
Canon	11	101106848	A	G	DOID:4159 / skin cancer/HERV9	GE	3622	MU58539751		intergenic_region
Canon	1	188308976	C	A	DOID:1324 / lung cancer/HERVL	S	6135	MU54953682		intergenic_region
Canon	8	54398213	T	A	DOID:219 / colon cancer/HERVS	S	2826	MU63805612		intergenic_region
Canon	2	229166197	A	C	DOID:5041 / esophageal cancer/HUERSP3	GE	833	MU70064841		intergenic_region
Canon	8	91106692	G	T	DOID:1793 / pancreatic cancer/HERVH	GE	2897	MU23535002	CALB1	intron_variant
Canon	8	50346964	T	C	DOID:5041 / esophageal cancer/HERV9	GE	2813	MU69700392		intergenic_region
Canon	5	129975361	A	G	DOID:4159 / skin cancer/HERV9	GE	1989	MU59073866		intergenic_region
Canon	1	5112188	G	A	DOID:4159 / skin cancer/HERVH	GE	5811	MU57302648		intergenic_region
Canon	16	65311681	G	A	DOID:4159 / skin cancer/HERVH	GE	4405	MU60219511	RP11-256I9.3	intron_variant
Canon	2	116945474	C	T	DOID:1793 / pancreatic cancer/HERVH	GE	655	MU30339526		intergenic_region
Canon	3	95306801	C	T	DOID:4159 / skin cancer/HERV9	GE	1027	MU44221831		intergenic_region
Canon	4	59174141	C	A	DOID:5041 / esophageal cancer/HERV9	GE	1413	MU298150		intergenic_region
Canon	6	58745094	C	T	DOID:4159 / skin cancer/HML3	AB	2156	MU39803414		intergenic_region
Canon	4	108302385	C	T	DOID:4159 / skin cancer/HERVIP	GE	1553	MU43862333		intergenic_region
Canon	9	118603135	A	T	DOID:4159 / skin cancer/HERVH	GE	3151	MU41699439		intergenic_region
Canon	8	69802438	C	T	DOID:4159 / skin cancer/HML3	AB	2850	MU50807757		intergenic_region
Canon	3	106646010	A	G	DOID:5041 / esophageal cancer/HERVH	GE	1056	MU69517347	LINC00882	intron_variant
Canon	14	87200012	C	A	DOID:1324 / lung cancer/HERVH	GE	4201	MU44610892		intergenic_region
Canon	5	28049385	C	T	DOID:4159 / skin cancer/HERVH	GE	1788	MU41993039		intergenic_region
Canon	8	84422972	T	G	DOID:5041 / esophageal cancer/HERVH	GE	2876	MU68145809		intergenic_region
Canon	2	82255106	G	A	DOID:4159 / skin cancer/HML9	AB	594	MU44608045		intergenic_region
Canon	4	33733777	A	C	DOID:4159 / skin cancer/HERVL	S	1362	MU60624764		intergenic_region
Canon	10	54712812	G	A	DOID:4159 / skin cancer/HERVT	GE	3253	MU46261283		intergenic_region
Canon	13	56691345	G	C	DOID:4159 / skin cancer/HERVH	GE	3972	MU54716949		intergenic_region
Canon	8	54378634	G	A	DOID:4159 / skin cancer/HERV9	GE	2824	MU44315467		intergenic_region
Canon	11	80910064	G	C	DOID:4159 / skin cancer/HERVADP	GE	3558	MU43609447		intergenic_region
Canon	4	138401528	G	A	DOID:4159 / skin cancer/HERVE	GE	1632	MU44773555		intergenic_region
Canon	3	148136227	G	A	DOID:4159 / skin cancer/HERVH	GE	1162	MU41148818		intergenic_region
Canon	1	79954446	G	A	DOID:4159 / skin cancer/HERVH	GE	5938	MU52519789		intergenic_region
Canon	12	17179243	G	A	DOID:4159 / skin cancer/HERVH	GE	3722	MU57408431		intergenic_region
Canon	15	95300170	G	A	DOID:4159 / skin cancer/HERVH	GE	4319	MU53789031		intergenic_region
Canon	1	195706169	C	G	DOID:1793 / pancreatic cancer/MER50	GE	6148	MU31933196		intergenic_region
Canon	1	102064562	C	T	DOID:4159 / skin cancer/HERVH	GE	5985	MU49110791		intergenic_region
Canon	6	103083904	A	T	DOID:3571 / liver cancer/MER51	GE	2277	COSN6718344	.	.
Canon	11	81712402	T	G	DOID:3571 / liver cancer/MER52	GE	3564	MU28737562	RP11-179A16.1	intron_variant
Canon	16	7864925	C	A	DOID:5041 / esophageal cancer/HERVH	GE	4334	MU528162		intergenic_region
Canon	4	59328418	C	T	DOID:4159 / skin cancer/HERV9	GE	1417	MU46931674		intergenic_region
Canon	4	20634517	G	T	DOID:1319 / brain cancer/HERVH	GE	1336	MU67579132		intergenic_region
Canon	2	194997810	G	A	DOID:4159 / skin cancer/HERVH	GE	780	MU42271109		intergenic_region
Canon	8	69805972	A	G	DOID:4159 / skin cancer/HML3	AB	2850	MU47449916		intergenic_region
Canon	2	81884096	C	T	DOID:4159 / skin cancer/HERVIP	GE	593	MU59130065		intergenic_region
Canon	1	102065012	T	A	DOID:263 / kidney cancer/HERVH	GE	5985	MU4179711		intergenic_region
Canon	3	145273871	C	T	DOID:4159 / skin cancer/HERVH	GE	1151	MU58496787		intergenic_region
Canon	18	27720465	C	T	DOID:4159 / skin cancer/MER51	GE	4529	MU57287714		intergenic_region
Canon	13	90315531	G	A	DOID:3571 / liver cancer/PABL	GE	4034	MU3164944		intergenic_region
Canon	2	124257644	G	C	DOID:5041 / esophageal cancer/HERVL	S	667	MU70800254		intergenic_region
Canon	4	65430775	T	G	DOID:5041 / esophageal cancer/HML3	AB	1434	MU68784435		intergenic_region
Canon	2	179918819	C	T	DOID:1793 / pancreatic cancer/HERVH	GE	753	MU6411277		intergenic_region
Canon	3	35920821	C	A	DOID:1324 / lung cancer/HERVH	GE	917	MU63334718		intergenic_region
Canon	7	85720632	A	G	DOID:263 / kidney cancer/HERVL	S	2548	MU4117521		intergenic_region
Canon	4	134868297	T	A	DOID:1793 / pancreatic cancer/HERVADP	GE	1617	MU64062646	RP11-427M20.1	intron_variant
Canon	8	54052277	G	A	DOID:4159 / skin cancer/HERV9	GE	2822	MU62677336		intergenic_region
Canon	4	93362577	G	T	DOID:1612 / breast cancer/HERVH	GE	1514	MU31666576	GRID2	intron_variant
Canon	12	118090107	T	G	DOID:5041 / esophageal cancer/HERVL	S	3906	MU25570834	KSR2	intron_variant
Canon	6	102551030	C	T	DOID:4159 / skin cancer/HERVH	GE	2275	MU54010903		intergenic_region
Canon	5	114333602	A	G	DOID:4159 / skin cancer/HERV9	GE	1954	MU41170539		intergenic_region
Canon	14	87200276	C	G	DOID:1324 / lung cancer/HERVH	GE	4201	MU46526812		intergenic_region
Canon	3	167143155	T	A	DOID:4159 / skin cancer/HERVH	GE	1225	MU45476697		intergenic_region
Canon	7	54027658	T	C	DOID:5041 / esophageal cancer/HERV9	GE	2496	MU26289117		intergenic_region
Canon	2	41726331	G	A	DOID:4159 / skin cancer/HUERSP3	GE	521	MU36479490		intergenic_region
Canon	5	46002606	C	G	DOID:4159 / skin cancer/HML2	AB	1836	MU51963792		intergenic_region
Canon	3	82692034	A	C	DOID:4159 / skin cancer/MER52	GE	999	MU46501547		intergenic_region
Canon	8	91422790	A	G	DOID:1324 / lung cancer/HERVL	S	2898	MU54403489	LINC00534	intron_variant
Canon	7	91079934	G	A	DOID:1793 / pancreatic cancer/HERV9	GE	2554	MU68541497	RP11-115N4.1	intron_variant
Canon	3	161695487	G	A	DOID:4159 / skin cancer/HUERSP2	GE	1197	MU62796059		intergenic_region
Canon	13	90308533	G	A	DOID:4159 / skin cancer/PABL	GE	4034	MU45745264		intergenic_region
Canon	13	64938675	A	C	DOID:5041 / esophageal cancer/HERVL	S	3984	MU33049979		intergenic_region
Canon	11	81742895	T	C	DOID:5041 / esophageal cancer/HERVH	GE	3565	MU538848	RP11-179A16.1	intron_variant
Canon	4	131931046	A	G	DOID:3571 / liver cancer/MER51	GE	1603	MU3265561		intergenic_region
Canon	6	78305858	A	G	DOID:4159 / skin cancer/HERVL	S	2212	MU47790820		intergenic_region
Canon	3	172873273	A	T	DOID:4159 / skin cancer/HERVH	GE	1237	MU48753953	RP11-324C10.1	intron_variant
Canon	18	57399241	G	A	DOID:4159 / skin cancer/ERV1_ARTIODACT	GE	4572	MU53136235		intergenic_region
Canon	16	35142081	C	A	DOID:5041 / esophageal cancer/HERVH	GE	4379	MU23233691		intergenic_region
Canon	11	133498689	C	G	DOID:5041 / esophageal cancer/HERVH	GE	3677	MU68180405		intergenic_region
Canon	18	54082686	A	C	DOID:5041 / esophageal cancer/HERVH	GE	4566	MU68933188		intergenic_region
Canon	18	62349965	T	A	DOID:5041 / esophageal cancer/HERVH	GE	4579	MU24431574		intergenic_region
Canon	12	17453653	G	A	DOID:4159 / skin cancer/HERVE	GE	3723	MU42993544		intergenic_region
Canon	5	103931655	T	G	DOID:5041 / esophageal cancer/HERVFA	GE	1928	MU23894301	RP11-6N13.1	intron_variant
Canon	2	81880996	A	T	DOID:1793 / pancreatic cancer/HERVIP	GE	593	MU30456094		intergenic_region
Canon	2	78195779	G	A	DOID:5041 / esophageal cancer/HERVH	GE	584	MU239284		intergenic_region
Canon	1	102552276	A	C	DOID:2531 / hematologic cancer/HERVIP	GE	5986	MU69625104		intergenic_region
Canon	14	87202258	T	C	DOID:4159 / skin cancer/HERVH	GE	4201	MU45163512		intergenic_region
Canon	4	134939534	G	A	DOID:1324 / lung cancer/HERVH	GE	1620	MU49272578		intergenic_region
Canon	5	40109765	G	A	DOID:1612 / breast cancer/HML8	AB	1818	MU66736692		intergenic_region
Canon	1	247871565	G	A	DOID:4159 / skin cancer/HERVL	S	6254	MU44863911	OR6F1	downstream_gene_variant
Canon	7	119651203	A	C	DOID:4159 / skin cancer/HERVH	GE	2609	MU45355665		intergenic_region
Canon	8	47564171	A	T	DOID:4159 / skin cancer/HML5	AB	2798	MU41044752		intergenic_region
Canon	5	32675411	C	T	DOID:4159 / skin cancer/HERV9	GE	1799	MU48901194		intergenic_region
Canon	8	5684456	C	T	DOID:4159 / skin cancer/HERVIP	GE	2688	MU59370520		intergenic_region
Canon	11	132247273	G	T	DOID:2394 / ovarian cancer/HERVL	S	3676	MU6406065		intergenic_region
Canon	8	39741743	A	G	DOID:4159 / skin cancer/HERV9	GE	2772	MU47169241		intergenic_region
Canon	2	153032	C	T	DOID:4159 / skin cancer/HERVW	GE	460	MU42372681		intergenic_region
Canon	14	80694555	T	C	DOID:5041 / esophageal cancer/HERVL	S	4189	MU70535994	DIO2	intron_variant
Canon	14	87200281	C	T	DOID:4159 / skin cancer/HERVH	GE	4201	MU56872333		intergenic_region
Canon	4	59325498	C	T	DOID:4159 / skin cancer/HERV9	GE	1417	MU61816282		intergenic_region
Canon	7	88175324	C	T	DOID:2531 / hematologic cancer/HUERSP3	GE	2552	MU67565247		intergenic_region
Canon	18	1859344	A	C	DOID:5041 / esophageal cancer/HERVL	S	4494	MU69961818		intergenic_region
Canon	16	7866453	C	T	DOID:1793 / pancreatic cancer/HERVH	GE	4334	MU9199344		intergenic_region
Canon	2	229164694	G	A	DOID:4159 / skin cancer/HUERSP3	GE	833	MU42755529		intergenic_region
Canon	4	65593958	C	T	DOID:2531 / hematologic cancer/MER51	GE	1436	MU69652483		intergenic_region
Canon	7	145753479	C	T	DOID:4159 / skin cancer/HERVADP	GE	2666	MU50759862		intergenic_region
Canon	1	195702460	C	T	DOID:4159 / skin cancer/MER50	GE	6148	MU43929986		intergenic_region
Canon	3	97966788	C	T	DOID:4159 / skin cancer/HERVH	GE	1036	MU44270047	RP11-325B23.2	intron_variant
Canon	4	31611842	G	T	DOID:3571 / liver cancer/HEPSI	GE	1356	MU2526516		intergenic_region
Canon	7	124900750	G	A	DOID:4159 / skin cancer/HERVH	GE	2623	MU53157479	RP11-3B12.3	intron_variant
Canon	1	188635277	A	G	DOID:1612 / breast cancer/HERVFRD	GE	6139	MU63476006		intergenic_region
Canon	7	118828703	G	A	DOID:4159 / skin cancer/HERVL	S	2605	MU58320633		intergenic_region
Canon	18	62350724	G	A	DOID:1793 / pancreatic cancer/HERVH	GE	4579	MU69005714		intergenic_region
Canon	13	104859501	C	A	DOID:10283 / prostate cancer/HERVH	GE	4055	COSN8340339	.	.
Canon	4	134187390	G	A	DOID:4159 / skin cancer/HERVH	GE	1613	MU55610980		intergenic_region
Canon	4	138405683	C	T	DOID:4159 / skin cancer/HERVE	GE	1632	MU36576690		intergenic_region
Canon	2	35027677	C	T	DOID:4159 / skin cancer/HERVH	GE	505	MU52778215	AC012593.1	intron_variant
Canon	12	118090763	G	A	DOID:4159 / skin cancer/HERVL	S	3906	MU50064684	KSR2	intron_variant
Canon	11	132247854	A	C	DOID:5041 / esophageal cancer/HERVL	S	3676	MU484710		intergenic_region
Canon	5	40105102	C	T	DOID:4159 / skin cancer/HML8	AB	1818	MU37122387		intergenic_region
Canon	3	168286016	C	T	DOID:4159 / skin cancer/HEPSI1	GE	1227	MU60036425	EGFEM1P	intron_variant
Canon	2	229167842	G	A	DOID:4159 / skin cancer/HUERSP3	GE	833	MU59300555		intergenic_region
Canon	4	116938864	G	A	DOID:4159 / skin cancer/HERV3	GE	1576	MU53131384	RP11-659O3.1	intron_variant
Canon	10	107778581	A	C	DOID:5041 / esophageal cancer/HERVH	GE	3349	MU20984059		intergenic_region
Canon	5	96650830	C	T	DOID:4159 / skin cancer/HERV9	GE	1909	MU60522063	RP11-155G15.2	intron_variant
Canon	18	27717629	T	G	DOID:5041 / esophageal cancer/MER51	GE	4529	MU70742712		intergenic_region
Canon	3	34847672	G	A	DOID:4159 / skin cancer/HEPSI1	GE	916	MU52053875		intergenic_region
Canon	4	65596966	C	T	DOID:4159 / skin cancer/MER51	GE	1436	MU49806353		intergenic_region
Canon	2	195025099	A	G	DOID:4159 / skin cancer/HERVADP	GE	782	MU44471783		intergenic_region
Canon	8	39709816	G	T	DOID:1324 / lung cancer/HERVIP	GE	2773	MU60403317		intergenic_region
Canon	3	167140900	T	C	DOID:4159 / skin cancer/HERVH	GE	1225	MU47428370		intergenic_region
Canon	1	79957623	G	A	DOID:4159 / skin cancer/HERVH	GE	5938	MU56882185		intergenic_region
Canon	13	55628723	G	C	DOID:1612 / breast cancer/HERVW	GE	3967	MU66992049		intergenic_region
Canon	7	82273911	C	T	DOID:1612 / breast cancer/HERV9	GE	2542	MU65783698		intergenic_region
Canon	11	101084306	C	T	DOID:4159 / skin cancer/HML8	AB	3621	MU59344194		intergenic_region
Canon	6	29213406	G	A	DOID:4159 / skin cancer/HERVH	GE	2107	MU48067632	XXbac-BPG308J9.3	intron_variant
Canon	4	33735746	T	C	DOID:1324 / lung cancer/HERVL	S	1362	MU48867914		intergenic_region
Canon	1	79338661	G	T	DOID:5041 / esophageal cancer/HERVH	GE	5937	MU69292346		intergenic_region
Canon	3	67088843	C	T	DOID:1319 / brain cancer/HERVH	GE	971	MU68927027		intergenic_region
Canon	7	54519433	C	T	DOID:4159 / skin cancer/HML3	AB	2498	MU38582463		intergenic_region
Canon	4	134184856	G	T	DOID:1793 / pancreatic cancer/HERVH	GE	1613	MU12490763		intergenic_region
Canon	10	42888491	A	C	DOID:4159 / skin cancer/HERVFA	GE	3231	MU51158409		intergenic_region
Canon	10	37565129	T	C	DOID:3571 / liver cancer/HERV9	GE	3224	MU3319156	ATP8A2P1	intron_variant
Canon	13	104861369	C	T	DOID:4159 / skin cancer/HERVH	GE	4055	MU59391720		intergenic_region
Canon	7	145751701	C	G	DOID:1793 / pancreatic cancer/HERVADP	GE	2666	MU31526879		intergenic_region
Canon	3	34848712	G	A	DOID:4159 / skin cancer/HEPSI1	GE	916	MU40649928		intergenic_region
Canon	8	47493470	G	A	DOID:4159 / skin cancer/HML8	AB	2797	MU59526348	ASNSP1	intron_variant
Canon	7	88172904	C	T	DOID:4159 / skin cancer/HUERSP3	GE	2552	MU55031461		intergenic_region
Canon	16	65311851	G	A	DOID:4159 / skin cancer/HERVH	GE	4405	MU50554131	RP11-256I9.3	intron_variant
Canon	2	79279551	C	G	DOID:4159 / skin cancer/HERVH	GE	586	MU59981237		intergenic_region
Canon	3	34846463	C	T	DOID:4159 / skin cancer/HEPSI1	GE	916	MU52426495		intergenic_region
Canon	16	35133946	G	A	DOID:2394 / ovarian cancer/HERVT	GE	4380	MU8291748		intergenic_region
Canon	11	49343553	A	T	DOID:1793 / pancreatic cancer/HERVH	GE	3466	MU30444606	CTD-2026G22.1	intron_variant
Canon	6	77197820	G	T	DOID:3571 / liver cancer/HML8	AB	2209	MU9760054		intergenic_region
Canon	12	21102998	C	G	DOID:4159 / skin cancer/HUERSP3	GE	3732	MU43706980	LST3	intron_variant
Canon	2	141187484	C	T	DOID:4159 / skin cancer/HERVH	GE	695	MU56488811	LRP1B	intron_variant
Canon	7	125562622	C	A	DOID:3571 / liver cancer/HERVH	GE	2627	MU46427624	AC005276.1	intron_variant
Canon	7	82274144	C	T	DOID:1793 / pancreatic cancer/HERV9	GE	2542	MU7662924		intergenic_region
Canon	8	64837025	T	G	DOID:5041 / esophageal cancer/HERVL	S	2844	MU70512009	RP11-32K4.1	intron_variant
Canon	5	3952878	C	T	DOID:4159 / skin cancer/HERVL	S	1746	MU55200448		intergenic_region
Canon	3	167143723	C	G	DOID:1612 / breast cancer/HERVH	GE	1225	MU66780823		intergenic_region
Canon	1	247872796	C	T	DOID:4159 / skin cancer/HERVL	S	6254	MU45047091	OR6F1	downstream_gene_variant
Canon	3	486223	C	T	DOID:4159 / skin cancer/HERVL	S	848	MU38558461		intergenic_region
Canon	15	95300507	G	A	DOID:4159 / skin cancer/HERVH	GE	4319	MU41569012		intergenic_region
Canon	13	63789784	T	A	DOID:4159 / skin cancer/HERVH	GE	3979	MU40622380	LINC00376	intron_variant
Canon	14	106658647	G	A	DOID:4159 / skin cancer/HERVT	GE	4229	MU33430553		intergenic_region
Canon	2	76099967	C	T	DOID:4159 / skin cancer/HERVW	GE	577	MU60691816		intergenic_region
Canon	2	141184788	C	A	DOID:10283 / prostate cancer/HERVH	GE	695	MU4725782	LRP1B	intron_variant
Canon	2	41721207	C	T	DOID:4159 / skin cancer/HUERSP3	GE	521	MU62669914		intergenic_region
Canon	11	56765387	C	T	DOID:4159 / skin cancer/MER52	GE	3497	MU44058291		intergenic_region
Canon	3	146073312	G	A	DOID:4159 / skin cancer/HERVH	GE	1154	MU42095563		intergenic_region
Canon	2	179916748	G	A	DOID:4159 / skin cancer/HERVH	GE	753	MU42766532		intergenic_region
Canon	3	82694391	A	G	DOID:5041 / esophageal cancer/MER52	GE	999	MU70758974		intergenic_region
Canon	4	134868316	C	T	DOID:4159 / skin cancer/HERVADP	GE	1617	MU54327806	RP11-427M20.1	intron_variant
Canon	4	167446655	C	A	DOID:4159 / skin cancer/HERVH	GE	1687	MU40650899	RP11-217C7.1	intron_variant
Canon	4	63928137	G	C	DOID:1612 / breast cancer/HERV9	GE	1425	MU66858126		intergenic_region
Canon	8	65039129	G	A	DOID:4159 / skin cancer/HERVL	S	2845	MU58523317	RP11-32K4.1	intron_variant
Canon	11	96240002	G	A	DOID:4159 / skin cancer/LTR46	GE	3609	MU48042955	JRKL-AS1	upstream_gene_variant
Canon	21	18268301	A	T	DOID:10283 / prostate cancer/HERVH	GE	4866	MU29864099		intergenic_region
Canon	5	32674303	G	A	DOID:4159 / skin cancer/HERV9	GE	1799	MU38284637		intergenic_region
Canon	4	135449568	C	T	DOID:4159 / skin cancer/HEPSI1	GE	1621	MU62699926		intergenic_region
Canon	7	138027178	G	A	DOID:4159 / skin cancer/HML1	AB	2644	MU61445095		intergenic_region
Canon	5	45800651	C	T	DOID:5041 / esophageal cancer/MER52	GE	1834	MU32812192		intergenic_region
Canon	3	162442409	T	A	DOID:5041 / esophageal cancer/HERVH	GE	1203	MU20164917		intergenic_region
Canon	4	65598200	C	G	DOID:5041 / esophageal cancer/MER51	GE	1436	MU14262995		intergenic_region
Canon	11	127642534	A	C	DOID:2394 / ovarian cancer/HERVH	GE	3672	MU6380079		intergenic_region
Canon	4	108306419	G	A	DOID:4159 / skin cancer/HERVIP	GE	1553	MU47987073		intergenic_region
Canon	9	23924503	C	T	DOID:4159 / skin cancer/HERV9	GE	3020	MU58266686		intergenic_region
Canon	6	119719485	G	A	DOID:4159 / skin cancer/MER52	GE	2310	MU58981019		intergenic_region
Canon	11	132250271	T	G	DOID:5041 / esophageal cancer/HERVL	S	3676	MU22917939		intergenic_region
Canon	10	37573330	C	T	DOID:4159 / skin cancer/HERV9	GE	3224	MU61688227	ATP8A2P1	intron_variant
Canon	6	102553700	C	T	DOID:1793 / pancreatic cancer/HERVH	GE	2275	MU30179886		intergenic_region
Canon	1	82823934	G	A	DOID:4159 / skin cancer/HERVH	GE	5945	MU61811598		intergenic_region
Canon	11	39762600	G	A	DOID:4159 / skin cancer/HERVH	GE	3449	MU50347762		intergenic_region
Canon	10	84817671	G	A	DOID:4159 / skin cancer/HERVH	GE	3305	MU59842362		intergenic_region
Canon	4	44997138	C	T	DOID:4159 / skin cancer/HERVFRD	GE	1388	MU61927343		intergenic_region
Canon	2	81881643	C	T	DOID:4159 / skin cancer/HERVIP	GE	593	MU42582307		intergenic_region
Canon	1	82821693	G	A	DOID:4159 / skin cancer/HERVH	GE	5945	MU46779095		intergenic_region
Canon	11	81741189	G	A	DOID:4159 / skin cancer/HERVH	GE	3565	MU71293811	RP11-179A16.1	intron_variant
Canon	6	57622054	G	A	DOID:1324 / lung cancer/HML2	AB	2153	MU51213061		intergenic_region
Canon	10	37569320	C	T	DOID:4159 / skin cancer/HERV9	GE	3224	MU39948391	ATP8A2P1	intron_variant
Canon	5	45796080	C	T	DOID:4159 / skin cancer/MER52	GE	1834	MU54607608		intergenic_region
Canon	1	241598082	A	C	DOID:5041 / esophageal cancer/HERVH	GE	6234	MU22435038		intergenic_region
Canon	6	115554992	T	G	DOID:5041 / esophageal cancer/HERV9	GE	2298	MU466293		intergenic_region
Canon	3	167142936	A	C	DOID:5041 / esophageal cancer/HERVH	GE	1225	MU22541386		intergenic_region
Canon	1	181224242	G	A	DOID:4159 / skin cancer/HML8	AB	6122	MU51773041		intergenic_region
Canon	8	138837481	G	A	DOID:4159 / skin cancer/HERVH	GE	2972	MU44848310	RP11-238K6.1	intron_variant
Canon	8	54400595	G	A	DOID:2531 / hematologic cancer/HERVS	S	2826	MU69229599		intergenic_region
Canon	1	79345734	A	G	DOID:1612 / breast cancer/HERVH	GE	5937	MU66590208		intergenic_region
Canon	10	110805918	A	G	DOID:4159 / skin cancer/HERV9	GE	3355	MU54049461		intergenic_region
Canon	13	90312040	C	T	DOID:4159 / skin cancer/PABL	GE	4034	MU48817819		intergenic_region
Canon	2	77318675	G	A	DOID:1793 / pancreatic cancer/HERVH	GE	582	MU64340328	LRRTM4	intron_variant
Canon	4	59172584	A	T	DOID:263 / kidney cancer/HERV9	GE	1413	MU4081533		intergenic_region
Canon	6	130513900	C	T	DOID:4159 / skin cancer/HERVH	GE	2334	MU62018855	SAMD3	intron_variant
Canon	2	77317830	C	T	DOID:4159 / skin cancer/HERVH	GE	582	MU52304475	LRRTM4	intron_variant
Canon	8	73304589	C	T	DOID:4159 / skin cancer/HERV9	GE	2860	MU61774229		intergenic_region
Canon	11	123738232	C	T	DOID:1612 / breast cancer/HERVH	GE	3663	MU66828606		intergenic_region
Canon	2	179919139	G	T	DOID:1324 / lung cancer/HERVH	GE	753	MU48188623		intergenic_region
Canon	18	1856213	G	T	DOID:4159 / skin cancer/HERVL	S	4494	MU45053305		intergenic_region
Canon	10	84822793	T	C	DOID:10283 / prostate cancer/HERVH	GE	3305	MU53261854		intergenic_region
Canon	8	65035297	G	A	DOID:4159 / skin cancer/HERVL	S	2845	MU57220700	RP11-32K4.1	intron_variant
Canon	8	138298440	C	T	DOID:1793 / pancreatic cancer/HERVH48	GE	2970	MU40466214		intergenic_region
Canon	1	118773949	C	T	DOID:4159 / skin cancer/HERV9	GE	6029	MU50672600		intergenic_region
Canon	5	29391415	G	A	DOID:8618 / oral cavity cancer/HERVFB	GE	1790	MU67873295	CTD-2010I22.2	intron_variant
Canon	4	12369978	G	A	DOID:4159 / skin cancer/HERVH	GE	1324	MU40722218		intergenic_region
Canon	4	33735805	C	T	DOID:4159 / skin cancer/HERVL	S	1362	MU48666083		intergenic_region
Canon	4	33733924	C	T	DOID:4159 / skin cancer/HERVL	S	1362	MU50654872		intergenic_region
Canon	7	54029255	C	T	DOID:4159 / skin cancer/HERV9	GE	2496	MU44903879		intergenic_region
Canon	4	92618864	C	T	DOID:4159 / skin cancer/HML3	AB	1507	MU39212171		intergenic_region
Canon	21	18267275	C	T	DOID:4159 / skin cancer/HERVH	GE	4866	MU47394831		intergenic_region
Canon	13	56233219	G	A	DOID:4159 / skin cancer/HERVH	GE	3969	MU71294434		intergenic_region
Canon	2	81880185	C	T	DOID:4159 / skin cancer/HERVIP	GE	593	MU60724126		intergenic_region
Canon	16	65312223	A	G	DOID:4159 / skin cancer/HERVH	GE	4405	MU48786415	RP11-256I9.3	intron_variant
Canon	11	91333506	G	T	DOID:3571 / liver cancer/HERVL	S	3592	MU3742929		intergenic_region
Canon	4	12370777	C	T	DOID:4159 / skin cancer/HERVH	GE	1324	MU42419413		intergenic_region
Canon	8	138842622	G	A	DOID:4159 / skin cancer/HERVH	GE	2972	MU56584988	RP11-238K6.1	intron_variant
Canon	1	102556292	G	A	DOID:5041 / esophageal cancer/HERVIP	GE	5986	MU35392995		intergenic_region
Canon	5	103934104	G	T	DOID:1324 / lung cancer/HERVFA	GE	1928	MU52959878	RP11-6N13.1	intron_variant
Canon	6	103083741	C	T	DOID:4159 / skin cancer/MER51	GE	2277	MU56748787		intergenic_region
Canon	12	114507521	G	A	DOID:4159 / skin cancer/HERVIP	GE	3905	MU53160321		intergenic_region
Canon	19	20685917	G	A	DOID:4159 / skin cancer/HML8	AB	4642	MU46010399	CTC-513N18.6	intron_variant
Canon	13	87418103	T	C	DOID:1793 / pancreatic cancer/HERVFB	GE	4023	MU64525983		intergenic_region
Canon	6	63298209	C	T	DOID:4159 / skin cancer/HERVH	GE	2166	MU53995631		intergenic_region
Canon	3	36175234	G	A	DOID:4159 / skin cancer/MER52	GE	918	MU55487369		intergenic_region
Canon	11	39757691	G	A	DOID:1793 / pancreatic cancer/HERVH	GE	3449	MU11592531		intergenic_region
Canon	19	20661157	C	T	DOID:1324 / lung cancer/HERVH48	GE	4644	MU27563746	CTC-513N18.6	intron_variant
Canon	8	113211534	G	A	DOID:1612 / breast cancer/HERVH	GE	2930	MU67216115		intergenic_region
Canon	4	135451614	C	T	DOID:4159 / skin cancer/HEPSI1	GE	1621	MU51456220		intergenic_region
Canon	8	84422152	G	A	DOID:3571 / liver cancer/HERVH	GE	2876	COSN14905750	.	.
Canon	5	100652383	C	T	DOID:4159 / skin cancer/HERVH	GE	1922	MU47287143		intergenic_region
Canon	3	147595824	G	A	DOID:4159 / skin cancer/HUERSP2	GE	1159	MU55084528		intergenic_region
Canon	6	63298947	C	T	DOID:4159 / skin cancer/HERVH	GE	2166	MU40615191		intergenic_region
Canon	11	81706351	G	A	DOID:4159 / skin cancer/MER52	GE	3564	MU44297012	RP11-179A16.1	intron_variant
Canon	13	82903936	C	T	DOID:4159 / skin cancer/HUERSP3	GE	4013	MU62396701		intergenic_region
Canon	14	85026102	T	C	DOID:4159 / skin cancer/MER52	GE	4195	MU55782438		intergenic_region
Canon	1	71975041	G	A	DOID:4159 / skin cancer/HERVADP	GE	5921	MU47005833	NEGR1	intron_variant
Canon	1	5109962	C	T	DOID:4159 / skin cancer/HERVH	GE	5811	MU59411238		intergenic_region
Canon	3	162432560	C	T	DOID:4159 / skin cancer/HERVH	GE	1202	MU56485671		intergenic_region
Canon	5	18542511	G	A	DOID:4159 / skin cancer/HERVH	GE	1766	MU54562495		intergenic_region
Canon	7	54029370	C	T	DOID:4159 / skin cancer/HERV9	GE	2496	MU44107306		intergenic_region
Canon	18	54086580	A	G	DOID:4159 / skin cancer/HERVH	GE	4566	MU40918273		intergenic_region
Canon	6	115559803	G	A	DOID:4159 / skin cancer/HERV9	GE	2298	MU46967763		intergenic_region
Canon	3	166986315	G	A	DOID:4159 / skin cancer/HERVIP	GE	1224	MU45040210	ZBBX	intron_variant
Canon	7	119695495	G	A	DOID:4159 / skin cancer/HERV3	GE	2608	MU46489259		intergenic_region
Canon	7	138025399	G	A	DOID:4159 / skin cancer/HML1	AB	2644	MU57313367		intergenic_region
Canon	6	103082983	C	T	DOID:4159 / skin cancer/MER51	GE	2277	MU50227151		intergenic_region
Canon	14	27588400	C	T	DOID:4159 / skin cancer/HERVL	S	4091	MU44706384	RP11-384J4.2	intron_variant
Canon	4	168341750	C	T	DOID:4159 / skin cancer/HUERSP3	GE	1690	MU50602818		intergenic_region
Canon	14	87703875	G	A	DOID:4159 / skin cancer/HERVH	GE	4204	MU49203932		intergenic_region
Canon	14	82528636	C	G	DOID:1612 / breast cancer/HERVH	GE	4192	MU64875557		intergenic_region
Canon	3	161875698	G	A	DOID:4159 / skin cancer/HERVH	GE	1199	MU52186305		intergenic_region
Canon	6	103079691	C	T	DOID:4159 / skin cancer/MER51	GE	2277	MU71324926		intergenic_region
Canon	4	35345275	T	C	DOID:5041 / esophageal cancer/HERVL	S	1370	MU24701246		intergenic_region
Canon	1	248502550	A	G	DOID:1612 / breast cancer/HERVH	GE	6259	MU68305123		intergenic_region
Canon	6	115556469	C	T	DOID:4159 / skin cancer/HERV9	GE	2298	MU46737378		intergenic_region
Canon	8	132753038	C	T	DOID:1612 / breast cancer/HERVH	GE	2963	MU53728285		intergenic_region
Canon	6	78218496	C	T	DOID:4159 / skin cancer/HUERSP3	GE	2211	MU45162780		intergenic_region
Canon	3	162431901	C	T	DOID:4159 / skin cancer/HERVH	GE	1202	MU45189934		intergenic_region
Canon	3	162440482	T	C	DOID:4159 / skin cancer/HERVH	GE	1203	MU45206081		intergenic_region
Canon	4	44993256	G	A	DOID:2531 / hematologic cancer/HERVFRD	GE	1388	MU49579811		intergenic_region
Canon	19	20482332	C	T	DOID:4159 / skin cancer/HERVT	GE	4639	MU34216692	ZNF826P	intron_variant
Canon	3	161874596	A	G	DOID:4159 / skin cancer/HERVH	GE	1199	MU61353311		intergenic_region
Canon	7	145749462	G	A	DOID:4159 / skin cancer/HERVADP	GE	2666	MU39858903		intergenic_region
Canon	3	166546321	G	A	DOID:4159 / skin cancer/HERVH	GE	1220	MU53394016		intergenic_region
Canon	4	134933968	C	G	DOID:4159 / skin cancer/HERVH	GE	1620	MU47503833		intergenic_region
Canon	2	52253736	G	T	DOID:2531 / hematologic cancer/HERVH	GE	534	MU68568169	AC007682.1	intron_variant
Canon	13	87841495	G	A	DOID:4159 / skin cancer/HERVH	GE	4024	MU53295635		intergenic_region
Canon	2	79320852	A	G	DOID:1612 / breast cancer/HERVH48	GE	587	MU66912013		intergenic_region
Canon	16	35138899	A	G	DOID:3571 / liver cancer/HERVH	GE	4379	MU3773853		intergenic_region
Canon	11	42904553	G	A	DOID:4159 / skin cancer/HERV9	GE	3452	MU46501580		intergenic_region
Canon	4	171603495	G	A	DOID:4159 / skin cancer/HERVH	GE	1702	MU42983336		intergenic_region
Canon	8	91423318	G	A	DOID:4159 / skin cancer/HERVL	S	2898	MU38421817	LINC00534	intron_variant
Canon	2	81879481	G	A	DOID:1319 / brain cancer/HERVIP	GE	593	MU68226447		intergenic_region
Canon	13	55635480	C	T	DOID:4159 / skin cancer/HERVW	GE	3967	MU40720914		intergenic_region
Canon	19	22752058	C	T	DOID:4159 / skin cancer/HERVH	GE	4670	MU58263952		intergenic_region
Canon	2	229164869	C	T	DOID:4159 / skin cancer/HUERSP3	GE	833	MU46348557		intergenic_region
Canon	5	49672762	C	A	DOID:1793 / pancreatic cancer/HERV9	GE	1841	COSN7945251	.	SNP
Canon	4	63919782	C	A	DOID:5041 / esophageal cancer/HERV9	GE	1425	MU34867834		intergenic_region
Canon	7	119649949	C	A	DOID:3571 / liver cancer/HERVH	GE	2609	MU70053116		intergenic_region
Canon	8	69807126	C	T	DOID:4159 / skin cancer/HML3	AB	2850	MU48238934		intergenic_region
Canon	2	79438688	G	T	DOID:3571 / liver cancer/HERVH	GE	588	MU1267750	CTNNA2	intron_variant
Canon	3	103314878	G	A	DOID:4159 / skin cancer/HERVL	S	1049	MU62400645		intergenic_region
Canon	5	46004769	A	C	DOID:1324 / lung cancer/HML2	AB	1836	MU52910785		intergenic_region
Canon	7	82268539	G	A	DOID:4159 / skin cancer/HERV9	GE	2542	MU55981335		intergenic_region
Canon	7	119651995	G	A	DOID:263 / kidney cancer/HERVH	GE	2609	MU4300774		intergenic_region
Canon	4	64862626	G	A	DOID:4159 / skin cancer/HEPSI3	GE	1428	MU71209280		intergenic_region
Canon	11	101087932	A	C	DOID:4159 / skin cancer/HML8	AB	3621	MU62701754		intergenic_region
Canon	8	72581216	C	A	DOID:4159 / skin cancer/HERVH	GE	2855	MU49919562		intergenic_region
Canon	8	73307790	G	A	DOID:4159 / skin cancer/HERV9	GE	2860	MU43374552		intergenic_region
Canon	2	160135	G	A	DOID:4159 / skin cancer/HERVW	GE	460	MU55767589		intergenic_region
Canon	2	148069948	C	T	DOID:4159 / skin cancer/HERV9	GE	702	MU60116889		intergenic_region
Canon	6	48841982	A	G	DOID:5041 / esophageal cancer/HML9	AB	2137	MU36168761		intergenic_region
Canon	3	172994278	A	G	DOID:3571 / liver cancer/HERVH48	GE	1239	MU3821750	RP11-324C10.1	intron_variant
Canon	12	34679522	C	T	DOID:4159 / skin cancer/HML8	AB	3761	MU39131895		intergenic_region
Canon	21	18288038	C	T	DOID:4159 / skin cancer/HERVH	GE	4867	MU51535354		intergenic_region
Canon	5	103370290	C	A	DOID:3571 / liver cancer/HERVH	GE	1926	MU5109607		intergenic_region
Canon	10	57732424	G	A	DOID:4159 / skin cancer/HERVH	GE	3261	MU40772539		intergenic_region
Canon	4	65593503	C	G	DOID:1612 / breast cancer/MER51	GE	1436	MU65658899		intergenic_region
Canon	6	77199855	C	T	DOID:4159 / skin cancer/HML8	AB	2209	MU56490049		intergenic_region
Canon	8	73303462	C	T	DOID:4159 / skin cancer/HERV9	GE	2860	MU57799804		intergenic_region
Canon	10	59592341	G	A	DOID:4159 / skin cancer/HERV9	GE	3269	MU49352365		intergenic_region
Canon	13	87414459	A	C	DOID:5041 / esophageal cancer/HERVFB	GE	4023	MU32802510		intergenic_region
Canon	3	26199326	G	A	DOID:4159 / skin cancer/HERVH	GE	894	MU48281515		intergenic_region
Canon	3	146082576	T	A	DOID:1612 / breast cancer/HERVH	GE	1155	MU64307611		intergenic_region
Canon	4	179129567	C	T	DOID:4159 / skin cancer/HERVH	GE	1721	MU35915353		intergenic_region
Canon	3	162431835	C	T	DOID:4159 / skin cancer/HERVH	GE	1202	MU46319460		intergenic_region
Canon	4	20631573	C	T	DOID:4159 / skin cancer/HERVH	GE	1336	MU52286294		intergenic_region
Canon	3	103315520	T	A	DOID:3571 / liver cancer/HERVL	S	1049	MU28803828		intergenic_region
Canon	15	95300126	G	A	DOID:4159 / skin cancer/HERVH	GE	4319	MU56027734		intergenic_region
Canon	2	78196404	C	T	DOID:2531 / hematologic cancer/HERVH	GE	584	MU45773594		intergenic_region
Canon	2	78062005	C	T	DOID:4159 / skin cancer/MER50	GE	583	MU48091126		intergenic_region
Canon	5	45795545	A	G	DOID:3571 / liver cancer/MER52	GE	1834	MU10730881		intergenic_region
Canon	8	35813661	C	T	DOID:4159 / skin cancer/HERVE	GE	2763	MU60175703	RP11-473J6.1	intron_variant
Canon	1	83423647	C	T	DOID:4159 / skin cancer/HERVH	GE	5946	MU62622986	RP4-601K24.1	intron_variant
Canon	12	128095216	T	C	DOID:5041 / esophageal cancer/HERV9	GE	3916	MU71067035		intergenic_region
Canon	7	85717369	C	T	DOID:4159 / skin cancer/HERVL	S	2548	MU52391137		intergenic_region
Canon	11	39151266	C	T	DOID:4159 / skin cancer/HERVL	S	3445	MU61783694		intergenic_region
Canon	19	20663286	T	C	DOID:5041 / esophageal cancer/HERVH48	GE	4644	MU69964681	CTC-513N18.6	intron_variant
Canon	12	21105001	C	G	DOID:2394 / ovarian cancer/HUERSP3	GE	3732	COSN8705266	.	.
Canon	2	35029997	G	A	DOID:10283 / prostate cancer/HERVH	GE	505	MU55958809	AC012593.1	intron_variant
Canon	4	168340382	G	A	DOID:4159 / skin cancer/HUERSP3	GE	1690	MU53345259		intergenic_region
Canon	16	34510674	A	T	DOID:3571 / liver cancer/HERVT	GE	4374	COSN5834712	.	.
Canon	3	86588060	C	A	DOID:3571 / liver cancer/HERVH	GE	1007	MU3167982		intergenic_region
Canon	14	87199108	C	T	DOID:4159 / skin cancer/HERVH	GE	4201	MU58587151		intergenic_region
Canon	15	24934859	G	A	DOID:4159 / skin cancer/HERVH	GE	4245	MU58827226		intergenic_region
Canon	3	167143074	A	G	DOID:2531 / hematologic cancer/HERVH	GE	1225	MU1629905		intergenic_region
Canon	12	82291826	C	T	DOID:1612 / breast cancer/HERV9	GE	3853	MU65308468		intergenic_region
Canon	8	64834473	C	T	DOID:2394 / ovarian cancer/HERVL	S	2844	MU5681729	RP11-32K4.1	intron_variant
Canon	13	56229883	G	A	DOID:4159 / skin cancer/HERVH	GE	3969	MU43866696		intergenic_region
Canon	2	141188356	G	A	DOID:4159 / skin cancer/HERVH	GE	695	MU58415047	LRP1B	intron_variant
Canon	6	63796363	C	T	DOID:4159 / skin cancer/HERV9	GE	2169	MU45993920		intergenic_region
Canon	4	93359568	C	T	DOID:4159 / skin cancer/HERVH	GE	1514	MU47680821	GRID2	intron_variant
Canon	17	50659617	C	T	DOID:4159 / skin cancer/MER41	GE	4467	MU61357368		intergenic_region
Canon	19	20657898	G	T	DOID:4159 / skin cancer/HERVH48	GE	4644	MU62872725	CTC-513N18.6	intron_variant
Canon	8	69805946	A	T	DOID:4159 / skin cancer/HML3	AB	2850	MU59935305		intergenic_region
Canon	1	79957159	G	A	DOID:4159 / skin cancer/HERVH	GE	5938	MU50397060		intergenic_region
Canon	13	87842174	G	A	DOID:4159 / skin cancer/HERVH	GE	4024	MU47875705		intergenic_region
Canon	1	71972735	G	A	DOID:4159 / skin cancer/HERVADP	GE	5921	MU42265204	NEGR1	intron_variant
Canon	8	54049833	G	A	DOID:4159 / skin cancer/HERV9	GE	2822	MU55962448		intergenic_region
Canon	5	46005190	T	C	DOID:5041 / esophageal cancer/HML2	AB	1836	MU35322489		intergenic_region
Canon	2	78987634	G	T	DOID:1793 / pancreatic cancer/HERVH	GE	585	MU7134706		intergenic_region
Canon	8	138838458	G	A	DOID:4159 / skin cancer/HERVH	GE	2972	MU47004793	RP11-238K6.1	intron_variant
Canon	1	247870944	C	T	DOID:4159 / skin cancer/HERVL	S	6254	MU33364792	OR6F1	downstream_gene_variant
Canon	5	46009436	G	C	DOID:1612 / breast cancer/HML2	AB	1836	MU64846000		intergenic_region
Canon	6	62041258	C	T	DOID:4159 / skin cancer/MER52	GE	2161	MU37620387		intergenic_region
Canon	18	54088389	G	A	DOID:5041 / esophageal cancer/HERVH	GE	4566	MU16763272		intergenic_region
Canon	13	91496171	C	T	DOID:4159 / skin cancer/HERVH	GE	4039	MU54165865		intergenic_region
Canon	4	131935101	C	T	DOID:4159 / skin cancer/MER51	GE	1603	MU43853851		intergenic_region
Canon	10	57731699	A	C	DOID:2394 / ovarian cancer/HERVH	GE	3261	MU6015642		intergenic_region
Canon	16	35138942	G	T	DOID:1793 / pancreatic cancer/HERVH	GE	4379	MU9094533		intergenic_region
Canon	8	5298054	C	A	DOID:2394 / ovarian cancer/HERVH	GE	2687	MU5609978		intergenic_region
Canon	6	29220385	C	T	DOID:4159 / skin cancer/HERVH	GE	2107	MU51391489	XXbac-BPG308J9.3	intron_variant
Canon	14	87705812	G	A	DOID:4159 / skin cancer/HERVH	GE	4204	MU42204840		intergenic_region
Canon	18	54086259	G	T	DOID:1324 / lung cancer/HERVH	GE	4566	MU43306294		intergenic_region
Canon	12	118094345	G	A	DOID:4159 / skin cancer/HERVL	S	3906	MU43687477	KSR2	intron_variant
Canon	3	162434254	C	T	DOID:4159 / skin cancer/HERVH	GE	1202	MU56494816		intergenic_region
Canon	6	115557066	C	T	DOID:4159 / skin cancer/HERV9	GE	2298	MU41834995		intergenic_region
Canon	7	82269055	G	T	DOID:2531 / hematologic cancer/HERV9	GE	2542	MU68272563		intergenic_region
Canon	12	17176540	G	A	DOID:4159 / skin cancer/HERVH	GE	3722	MU62485923		intergenic_region
Canon	4	65430188	A	T	DOID:3571 / liver cancer/HML3	AB	1434	MU3211330		intergenic_region
Canon	18	54087582	C	G	DOID:1324 / lung cancer/HERVH	GE	4566	MU47170814		intergenic_region
Canon	2	195019631	C	T	DOID:4159 / skin cancer/HERVADP	GE	782	MU44956329		intergenic_region
Canon	1	79958858	G	T	DOID:1612 / breast cancer/HERVH	GE	5938	MU66280752		intergenic_region
Canon	6	57628234	G	A	DOID:1612 / breast cancer/HML2	AB	2153	COSN21660450	.	.
Canon	8	84421893	G	A	DOID:4159 / skin cancer/HERVH	GE	2876	MU43718547		intergenic_region
Canon	16	62681749	C	T	DOID:4159 / skin cancer/MER52	GE	4400	MU50250114		intergenic_region
Canon	5	114334321	C	T	DOID:4159 / skin cancer/HERV9	GE	1954	MU44283818		intergenic_region
Canon	8	39708414	G	A	DOID:1793 / pancreatic cancer/HERVIP	GE	2773	MU8118362		intergenic_region
Canon	8	54381020	C	T	DOID:3571 / liver cancer/HERV9	GE	2824	COSN16407995	.	SNP
Canon	12	34683021	C	T	DOID:1612 / breast cancer/HML8	AB	3761	MU66183479		intergenic_region
Canon	3	148134712	G	A	DOID:4159 / skin cancer/HERVH	GE	1162	MU61805767		intergenic_region
Canon	12	17177924	C	T	DOID:1612 / breast cancer/HERVH	GE	3722	MU65250818		intergenic_region
Canon	18	57398622	A	C	DOID:5041 / esophageal cancer/ERV1_ARTIODACT	GE	4572	MU37397590		intergenic_region
Canon	4	108305829	G	A	DOID:4159 / skin cancer/HERVIP	GE	1553	MU53739145		intergenic_region
Canon	4	17001154	C	T	DOID:4159 / skin cancer/HERVH	GE	1329	MU43937422	RP11-141E13.1	intron_variant
Canon	2	52254603	A	T	DOID:5041 / esophageal cancer/HERVH	GE	534	MU17699146	AC007682.1	intron_variant
Canon	11	81708985	G	A	DOID:4159 / skin cancer/MER52	GE	3564	MU51957686	RP11-179A16.1	intron_variant
Canon	1	71970518	C	T	DOID:4159 / skin cancer/HERVADP	GE	5921	MU42677484	NEGR1	intron_variant
Canon	5	113111713	G	A	DOID:4159 / skin cancer/HERV4	GE	1950	MU61267965		intergenic_region
Canon	6	62035888	C	T	DOID:4159 / skin cancer/MER52	GE	2161	MU58392791		intergenic_region
Canon	8	68619582	G	A	DOID:4159 / skin cancer/MER50	GE	2849	MU39883748	CPA6	intron_variant
Canon	4	35340579	G	A	DOID:4159 / skin cancer/HERVL	S	1370	MU36888100		intergenic_region
Canon	3	162433824	T	A	DOID:4159 / skin cancer/HERVH	GE	1202	MU53428455		intergenic_region
Canon	7	93271883	T	G	DOID:263 / kidney cancer/HERVH	GE	2565	MU3965249	GNGT1	intron_variant
Canon	11	50595117	A	T	DOID:1324 / lung cancer/HML8	AB	3475	MU61663333		intergenic_region
Canon	4	64865777	C	T	DOID:4159 / skin cancer/HEPSI3	GE	1428	MU38235995		intergenic_region
Canon	13	82902247	G	A	DOID:4159 / skin cancer/HUERSP3	GE	4013	MU57257924		intergenic_region
Canon	4	134870368	C	T	DOID:3571 / liver cancer/HERVADP	GE	1617	MU51709489	RP11-427M20.1	intron_variant
Canon	5	45799686	G	A	DOID:1324 / lung cancer/MER52	GE	1834	MU56367123		intergenic_region
Canon	4	128435516	A	T	DOID:1324 / lung cancer/HERVH	GE	1594	MU58441810		intergenic_region
Canon	10	84819762	C	T	DOID:5041 / esophageal cancer/HERVH	GE	3305	MU70533031		intergenic_region
Canon	7	119702686	T	G	DOID:5041 / esophageal cancer/HERV3	GE	2608	MU28343012		intergenic_region
Canon	8	50343744	C	T	DOID:1612 / breast cancer/HERV9	GE	2813	MU66006570		intergenic_region
Canon	6	102551347	T	C	DOID:5041 / esophageal cancer/HERVH	GE	2275	MU34256848		intergenic_region
Canon	5	32675025	G	A	DOID:4159 / skin cancer/HERV9	GE	1799	MU59439330		intergenic_region
Canon	4	131933607	C	T	DOID:4159 / skin cancer/MER51	GE	1603	MU43279538		intergenic_region
Canon	13	64941737	A	T	DOID:4159 / skin cancer/HERVL	S	3984	MU52273249		intergenic_region
Canon	4	45538165	G	A	DOID:4159 / skin cancer/HERV9	GE	1392	MU49358145		intergenic_region
Canon	11	101110442	G	A	DOID:4159 / skin cancer/HERV9	GE	3622	MU59434626		intergenic_region
Canon	13	63790625	G	T	DOID:5041 / esophageal cancer/HERVH	GE	3979	MU68555202	LINC00376	intron_variant
Canon	16	34503588	G	A	DOID:1612 / breast cancer/HERVT	GE	4374	MU65570581	RP11-488I20.8	intron_variant
Canon	14	85028784	T	A	DOID:4159 / skin cancer/MER52	GE	4195	MU43337628		intergenic_region
Canon	12	114497151	C	A	DOID:263 / kidney cancer/HERVH	GE	3903	MU4329582		intergenic_region
Canon	11	6096207	A	G	DOID:4159 / skin cancer/HERVH	GE	3393	MU60564111		intergenic_region
Canon	7	124904098	G	A	DOID:5041 / esophageal cancer/HERVH	GE	2623	MU70666296	RP11-3B12.3	splice_region_variant
Canon	8	113213516	C	T	DOID:4159 / skin cancer/HERVH	GE	2930	MU42115080		intergenic_region
Canon	7	54028273	C	T	DOID:4159 / skin cancer/HERV9	GE	2496	MU52364717		intergenic_region
Canon	6	78219991	C	T	DOID:4159 / skin cancer/HUERSP3	GE	2211	MU44076125		intergenic_region
Canon	1	248502968	C	T	DOID:4159 / skin cancer/HERVH	GE	6259	MU38938514		intergenic_region
Canon	1	194393800	G	A	DOID:4159 / skin cancer/HERV9	GE	6145	MU62414401		intergenic_region
Canon	4	137533805	C	T	DOID:4159 / skin cancer/HERVH	GE	1629	MU53621947		intergenic_region
Canon	7	54024353	C	T	DOID:4159 / skin cancer/HERV9	GE	2496	MU43283434		intergenic_region
Canon	8	72579947	T	C	DOID:1324 / lung cancer/HERVH	GE	2855	MU47274396		intergenic_region
Canon	6	77197777	C	T	DOID:5041 / esophageal cancer/HML8	AB	2209	MU15389115		intergenic_region
Canon	12	128097413	G	A	DOID:4159 / skin cancer/HERV9	GE	3916	MU46062680		intergenic_region
Canon	4	135450443	C	A	DOID:1324 / lung cancer/HEPSI1	GE	1621	MU50905803		intergenic_region
Canon	2	79322639	G	A	DOID:4159 / skin cancer/HERVH48	GE	587	MU35858538		intergenic_region
Canon	2	148069872	C	T	DOID:1612 / breast cancer/HERV9	GE	702	MU63474295		intergenic_region
Canon	16	62680852	A	C	DOID:4159 / skin cancer/MER52	GE	4400	MU36339421		intergenic_region
Canon	1	194393029	G	A	DOID:4159 / skin cancer/HERV9	GE	6145	MU43805692		intergenic_region
Canon	11	81523595	T	G	DOID:4159 / skin cancer/HERVH	GE	3562	MU15649534		intergenic_region
Canon	4	12368596	C	G	DOID:1612 / breast cancer/HERVH	GE	1324	COSN21297090	.	.
Canon	4	93365060	C	A	DOID:1793 / pancreatic cancer/HERVH	GE	1514	MU30089973	GRID2	intron_variant
Canon	10	107781435	G	A	DOID:4159 / skin cancer/HERVH	GE	3349	MU54573429		intergenic_region
Canon	19	21850434	C	T	DOID:2394 / ovarian cancer/HML3	AB	4659	MU8847310		intergenic_region
Canon	14	82530116	G	C	DOID:1612 / breast cancer/HERVH	GE	4192	MU66351165		intergenic_region
Canon	7	125559529	C	T	DOID:4159 / skin cancer/HERVH	GE	2627	MU61226337	AC005276.1	intron_variant
Canon	4	136089833	A	G	DOID:5041 / esophageal cancer/HERVH	GE	1624	MU70450705		intergenic_region
Canon	1	188641185	C	A	DOID:3571 / liver cancer/HERVFRD	GE	6139	MU914958		intergenic_region
Canon	13	56232757	G	A	DOID:4159 / skin cancer/HERVH	GE	3969	MU38539893		intergenic_region
Canon	3	163630348	A	G	DOID:1612 / breast cancer/HERVH	GE	1208	MU66857705		intergenic_region
Canon	6	62040421	G	A	DOID:4159 / skin cancer/MER52	GE	2161	MU46106370		intergenic_region
Canon	10	57733289	C	T	DOID:4159 / skin cancer/HERVH	GE	3261	MU51721540		intergenic_region
Canon	7	145748221	C	T	DOID:4159 / skin cancer/HERVADP	GE	2666	MU58762267		intergenic_region
Canon	3	148135579	C	T	DOID:1324 / lung cancer/HERVH	GE	1162	MU42505552		intergenic_region
Canon	4	59325940	G	A	DOID:4159 / skin cancer/HERV9	GE	1417	MU55741255		intergenic_region
Canon	7	145753875	G	A	DOID:4159 / skin cancer/HERVADP	GE	2666	MU36748983		intergenic_region
Canon	8	64835592	G	A	DOID:1793 / pancreatic cancer/HERVL	S	2844	MU8239032	RP11-32K4.1	intron_variant
Canon	18	41090233	G	A	DOID:4159 / skin cancer/HERVIP	GE	4551	MU62452261		intergenic_region
Canon	1	71969983	G	A	DOID:4159 / skin cancer/HERVADP	GE	5921	MU41544110	NEGR1	intron_variant
Canon	2	82252167	G	A	DOID:4159 / skin cancer/HML9	AB	594	MU61287460		intergenic_region
Canon	3	26202726	G	A	DOID:4159 / skin cancer/HERVH	GE	894	MU43208792		intergenic_region
Canon	3	95310323	G	A	DOID:4159 / skin cancer/HERV9	GE	1027	MU41000016		intergenic_region
Canon	4	167639417	T	C	DOID:5041 / esophageal cancer/HERVH	GE	1688	MU70666133		intergenic_region
Canon	7	91082267	A	G	DOID:1612 / breast cancer/HERV9	GE	2554	MU64887376	RP11-115N4.1	intron_variant
Canon	6	57628935	C	T	DOID:5041 / esophageal cancer/HML2	AB	2153	MU33198779		intergenic_region
Canon	6	115559077	C	T	DOID:4159 / skin cancer/HERV9	GE	2298	MU50864260		intergenic_region
Canon	8	43412288	C	T	DOID:4159 / skin cancer/HERVT	GE	2781	MU40661275		intergenic_region
Canon	6	62041130	C	T	DOID:4159 / skin cancer/MER52	GE	2161	MU44004191		intergenic_region
Canon	12	17456764	C	T	DOID:4159 / skin cancer/HERVE	GE	3723	MU62331208		intergenic_region
Canon	1	166575347	G	A	DOID:4159 / skin cancer/HML2	AB	6089	MU54394715	FMO9P	intron_variant
Canon	4	12366507	C	T	DOID:4159 / skin cancer/HERVH	GE	1324	MU63041811		intergenic_region
Canon	5	103933564	T	C	DOID:3571 / liver cancer/HERVFA	GE	1928	MU2994236	RP11-6N13.1	intron_variant
Canon	4	33734356	A	C	DOID:1793 / pancreatic cancer/HERVL	S	1362	MU32523207		intergenic_region
Canon	3	26321912	C	T	DOID:4159 / skin cancer/HEPSI2	GE	897	MU56323495		intergenic_region
Canon	4	128431999	A	G	DOID:4159 / skin cancer/HERVH	GE	1594	MU47750853		intergenic_region
Canon	2	78061433	C	T	DOID:1793 / pancreatic cancer/MER50	GE	583	MU12243647		intergenic_region
Canon	8	138841674	G	A	DOID:4159 / skin cancer/HERVH	GE	2972	MU55413846	RP11-238K6.1	intron_variant
Canon	15	95299037	C	T	DOID:4159 / skin cancer/HERVH	GE	4319	MU60640358		intergenic_region
Canon	8	39733913	C	A	DOID:5041 / esophageal cancer/HERV9	GE	2772	MU70044470		intergenic_region
Canon	12	17457515	G	C	DOID:4159 / skin cancer/HERVE	GE	3723	MU34126691		intergenic_region
Canon	11	123740998	G	A	DOID:2531 / hematologic cancer/HERVH	GE	3663	MU67823118		intergenic_region
Canon	5	114335584	C	T	DOID:4159 / skin cancer/HERV9	GE	1954	MU57205896		intergenic_region
Canon	11	49345726	T	C	DOID:4159 / skin cancer/HERVH	GE	3466	MU35326590	CTD-2026G22.1	intron_variant
Canon	2	79321602	G	A	DOID:4159 / skin cancer/HERVH48	GE	587	MU52728125		intergenic_region
Canon	3	97965497	A	C	DOID:8618 / oral cavity cancer/HERVH	GE	1036	MU68126870	RP11-325B23.2	intron_variant
Canon	13	55629349	G	C	DOID:1324 / lung cancer/HERVW	GE	3967	MU49168249		intergenic_region
Canon	18	57403780	G	A	DOID:4159 / skin cancer/ERV1_ARTIODACT	GE	4572	MU67882116		intergenic_region
Canon	7	119650502	C	T	DOID:4159 / skin cancer/HERVH	GE	2609	MU60112761		intergenic_region
Canon	11	101110613	G	A	DOID:4159 / skin cancer/HERV9	GE	3622	MU59802592		intergenic_region
Canon	6	121247530	C	T	DOID:2531 / hematologic cancer/HERVH	GE	2314	MU53499486		intergenic_region
Canon	8	84422020	G	A	DOID:4159 / skin cancer/HERVH	GE	2876	MU58093597		intergenic_region
Canon	7	125558582	C	T	DOID:4159 / skin cancer/HERVH	GE	2627	MU47159941	AC005276.1	intron_variant
Canon	5	3948518	G	A	DOID:3571 / liver cancer/HERVL	S	1746	MU53979053		intergenic_region
Canon	5	13198916	G	A	DOID:1793 / pancreatic cancer/HERVL	S	1761	MU32001275		intergenic_region
Canon	15	95303338	T	A	DOID:5041 / esophageal cancer/HERVH	GE	4319	MU34171015		intergenic_region
Canon	8	50343344	A	G	DOID:5041 / esophageal cancer/HERV9	GE	2813	MU70768813		intergenic_region
Canon	14	87701620	G	A	DOID:4159 / skin cancer/HERVH	GE	4204	MU57263650		intergenic_region
Canon	11	23956691	G	A	DOID:5041 / esophageal cancer/HERV9	GE	3420	MU2240243		intergenic_region
Canon	12	21102604	C	A	DOID:5041 / esophageal cancer/HUERSP3	GE	3732	MU15571159	LST3	intron_variant
Canon	2	141189720	C	T	DOID:2531 / hematologic cancer/HERVH	GE	695	MU68565421	LRP1B	intron_variant
Canon	3	35919834	G	A	DOID:4159 / skin cancer/HERVH	GE	917	MU58202493		intergenic_region
Canon	3	172878297	G	A	DOID:4159 / skin cancer/HERVH	GE	1237	MU42167342	RP11-324C10.1	intron_variant
Canon	5	46001696	A	C	DOID:5041 / esophageal cancer/HML2	AB	1836	MU69237851		intergenic_region
Canon	4	135452812	C	T	DOID:4159 / skin cancer/HEPSI1	GE	1621	MU51819270		intergenic_region
Canon	2	77318014	C	T	DOID:1793 / pancreatic cancer/HERVH	GE	582	MU3243804	LRRTM4	intron_variant
Canon	5	62864533	C	A	DOID:2394 / ovarian cancer/HUERSP2	GE	1864	MU8282424		intergenic_region
Canon	18	1856686	G	A	DOID:4159 / skin cancer/HERVL	S	4494	MU35896716		intergenic_region
Canon	13	90314382	A	T	DOID:3571 / liver cancer/PABL	GE	4034	MU2617463		intergenic_region
Canon	7	85371728	A	T	DOID:5041 / esophageal cancer/HERVIP	GE	2547	MU21641937		intergenic_region
Canon	2	148069570	C	A	DOID:1324 / lung cancer/HERV9	GE	702	MU47861216		intergenic_region
Canon	3	26200732	G	A	DOID:4159 / skin cancer/HERVH	GE	894	MU46976491		intergenic_region
Canon	2	188068152	C	T	DOID:4159 / skin cancer/HERVL	S	767	MU36624900	AC007319.1	intron_variant
Canon	7	145750743	T	A	DOID:5041 / esophageal cancer/HERVADP	GE	2666	MU70819122		intergenic_region
Canon	8	43753919	G	A	DOID:4159 / skin cancer/HML8	AB	2788	MU47569575		intergenic_region
Canon	1	188309182	C	T	DOID:4159 / skin cancer/HERVL	S	6135	MU61011545		intergenic_region
Canon	2	194998798	T	A	DOID:2394 / ovarian cancer/HERVH	GE	780	MU4979935		intergenic_region
Canon	6	61946258	A	G	DOID:4159 / skin cancer/HML3	AB	2159	MU54799297		intergenic_region
Canon	13	55269476	C	T	DOID:4159 / skin cancer/MER52	GE	3965	MU49138581		intergenic_region
Canon	5	62864253	G	A	DOID:4159 / skin cancer/HUERSP2	GE	1864	MU62417206		intergenic_region
Canon	18	40980239	C	A	DOID:4159 / skin cancer/HERVL	S	4550	MU55370441		intergenic_region
Canon	2	76100392	G	A	DOID:4159 / skin cancer/HERVW	GE	577	MU42466481		intergenic_region
Canon	8	114533288	C	T	DOID:4159 / skin cancer/MER50	GE	2934	MU62587855		intergenic_region
Canon	13	64940601	C	T	DOID:2531 / hematologic cancer/HERVL	S	3984	MU1452654		intergenic_region
Canon	6	48845792	A	G	DOID:5041 / esophageal cancer/HML9	AB	2137	MU34707368		intergenic_region
Canon	12	21107902	C	T	DOID:4159 / skin cancer/HUERSP3	GE	3732	MU61520438	LST3	intron_variant
Canon	3	6439874	C	T	DOID:1793 / pancreatic cancer/HERVH	GE	860	MU12436096		intergenic_region
Canon	4	167638359	C	T	DOID:4159 / skin cancer/HERVH	GE	1688	MU45744424		intergenic_region
Canon	13	82898606	C	T	DOID:4159 / skin cancer/HUERSP3	GE	4013	MU48982507		intergenic_region
Canon	6	63790743	G	A	DOID:4159 / skin cancer/HERV9	GE	2169	MU52538924		intergenic_region
Canon	17	50658477	A	C	DOID:2531 / hematologic cancer/MER41	GE	4467	MU69763380		intergenic_region
Canon	6	78306088	G	A	DOID:4159 / skin cancer/HERVL	S	2212	MU56082422		intergenic_region
Canon	11	101089894	C	T	DOID:4159 / skin cancer/HML8	AB	3621	MU39325156		intergenic_region
Canon	2	229167923	G	A	DOID:1612 / breast cancer/HUERSP3	GE	833	MU64864934		intergenic_region
Canon	3	35919701	G	A	DOID:4159 / skin cancer/HERVH	GE	917	MU61198034		intergenic_region
Canon	18	62349890	C	T	DOID:4159 / skin cancer/HERVH	GE	4579	MU53897499		intergenic_region
Canon	12	34678195	C	T	DOID:4159 / skin cancer/HML8	AB	3761	MU58133913		intergenic_region
Canon	3	166987333	C	T	DOID:4159 / skin cancer/HERVIP	GE	1224	MU55737678	ZBBX	intron_variant
Canon	1	71972003	T	C	DOID:5041 / esophageal cancer/HERVADP	GE	5921	MU71134319	NEGR1	intron_variant
Canon	1	181222152	C	T	DOID:4159 / skin cancer/HML8	AB	6122	MU20154059		intergenic_region
Canon	19	20684041	C	T	DOID:4159 / skin cancer/HML8	AB	4642	MU47617181	CTC-513N18.6	intron_variant
Canon	13	56230911	G	A	DOID:1793 / pancreatic cancer/HERVH	GE	3969	MU8135914		intergenic_region
Canon	5	28050311	C	G	DOID:5041 / esophageal cancer/HERVH	GE	1788	MU71007472		intergenic_region
Canon	6	98620075	C	T	DOID:1793 / pancreatic cancer/HERVL	S	2267	MU30089860	RP11-436D23.1	intron_variant
Canon	4	116941120	C	T	DOID:4159 / skin cancer/HERV3	GE	1576	MU58949254	RP11-659O3.1	intron_variant
Canon	13	91491813	G	C	DOID:1612 / breast cancer/HERVH	GE	4039	MU65762523		intergenic_region
Canon	1	248503476	G	A	DOID:4159 / skin cancer/HERVH	GE	6259	MU5246825		intergenic_region
Canon	8	91102607	G	A	DOID:4159 / skin cancer/HERVH	GE	2897	MU48970262	CALB1	intron_variant
Canon	2	79320150	C	T	DOID:4159 / skin cancer/HERVH48	GE	587	MU62242816		intergenic_region
Canon	7	124904514	C	G	DOID:1612 / breast cancer/HERVH	GE	2623	MU65329342	RP11-3B12.3	upstream_gene_variant
Canon	11	29544020	A	C	DOID:3571 / liver cancer/HERV3	GE	3431	MU6721914	RP11-460B17.3	intron_variant
Canon	2	79282278	T	A	DOID:1612 / breast cancer/HERVH	GE	586	MU66219997		intergenic_region
Canon	12	78872892	C	T	DOID:4159 / skin cancer/HERVIP	GE	3846	MU50590704	RP11-171L9.1	intron_variant
Canon	4	93196615	G	A	DOID:4159 / skin cancer/HERVH	GE	1513	MU48485536	RP11-562F9.2	intron_variant
Canon	16	35137124	T	G	DOID:1793 / pancreatic cancer/HERVH	GE	4379	COSN16582581	.	.
Canon	3	168281553	C	A	DOID:10283 / prostate cancer/HEPSI1	GE	1227	MU31417899	EGFEM1P	intron_variant
Canon	7	120421013	G	A	DOID:4159 / skin cancer/HERVH	GE	2611	MU71219809		intergenic_region
Canon	8	5733975	T	C	DOID:1793 / pancreatic cancer/HML5	AB	2691	MU8205282		intergenic_region
Canon	2	143252236	C	T	DOID:4159 / skin cancer/HERVH	GE	697	MU39104595		intergenic_region
Canon	8	61220642	G	A	DOID:4159 / skin cancer/HERVH	GE	2837	MU53286529		intergenic_region
Canon	11	42897776	C	T	DOID:4159 / skin cancer/HERV9	GE	3452	MU71409443		intergenic_region
Canon	6	29218047	G	A	DOID:4159 / skin cancer/HERVH	GE	2107	MU54936266	XXbac-BPG308J9.3	intron_variant
Canon	4	98022418	G	A	DOID:4159 / skin cancer/HML3	AB	1523	MU60027412		intergenic_region
Canon	3	96389006	G	A	DOID:4159 / skin cancer/HERVW	GE	1032	MU61308202		intergenic_region
Canon	13	87840625	A	T	DOID:1793 / pancreatic cancer/HERVH	GE	4024	MU30879974		intergenic_region
Canon	9	23918663	G	A	DOID:4159 / skin cancer/HERV9	GE	3020	MU58064212		intergenic_region
Canon	3	145432277	A	G	DOID:5041 / esophageal cancer/HERVH	GE	1152	MU35765092		intergenic_region
Canon	3	163634075	C	G	DOID:4159 / skin cancer/HERVH	GE	1208	MU55924256		intergenic_region
Canon	6	95267078	G	A	DOID:1612 / breast cancer/HERVH	GE	2263	MU68688751		intergenic_region
Canon	3	87658067	C	T	DOID:4159 / skin cancer/HERVIP	GE	1011	MU55119405		intergenic_region
Canon	10	96529669	C	T	DOID:4159 / skin cancer/HERV9	GE	3326	MU52267418	CYP2C19	intron_variant
Canon	13	90311268	G	T	DOID:1612 / breast cancer/PABL	GE	4034	MU66185447		intergenic_region
Canon	8	35816652	G	A	DOID:4159 / skin cancer/HERVE	GE	2763	MU50113530	RP11-473J6.1	intron_variant
Canon	6	62315351	G	T	DOID:1793 / pancreatic cancer/HERVH	GE	2164	MU63595300		intergenic_region
Canon	8	47497179	A	T	DOID:3571 / liver cancer/HML8	AB	2797	MU51932252	ASNSP1	intron_variant
Canon	13	87411736	G	C	DOID:263 / kidney cancer/HERVFB	GE	4023	MU4278397		intergenic_region
Canon	8	43752265	G	A	DOID:4159 / skin cancer/HML8	AB	2788	MU51098906		intergenic_region
Canon	5	113112014	C	T	DOID:4159 / skin cancer/HERV4	GE	1950	MU45935004		intergenic_region
Canon	5	62865284	C	T	DOID:4159 / skin cancer/HUERSP2	GE	1864	MU53951456		intergenic_region
Canon	8	5298199	G	A	DOID:5041 / esophageal cancer/HERVH	GE	2687	MU19715198		intergenic_region
Canon	4	134188839	G	A	DOID:4159 / skin cancer/HERVH	GE	1613	MU39218730		intergenic_region
Canon	4	59172605	C	T	DOID:4159 / skin cancer/HERV9	GE	1413	MU39693091		intergenic_region
Canon	2	193788399	A	T	DOID:4159 / skin cancer/HERVH	GE	778	MU51194757		intergenic_region
Canon	18	27000226	T	C	DOID:4159 / skin cancer/HML5	AB	4527	MU36373882		intergenic_region
Canon	3	21233382	G	C	DOID:263 / kidney cancer/HERVH	GE	890	MU4149205		intergenic_region
Canon	4	17001326	C	A	DOID:3571 / liver cancer/HERVH	GE	1329	MU2658015	RP11-141E13.1	intron_variant
Canon	13	55636232	G	A	DOID:4159 / skin cancer/HERVW	GE	3967	MU46639557		intergenic_region
Canon	1	79338641	C	T	DOID:1612 / breast cancer/HERVH	GE	5937	MU64888691		intergenic_region
Canon	7	138052090	G	A	DOID:1324 / lung cancer/HERVH	GE	2645	MU50951318		intergenic_region
Canon	10	59597380	G	A	DOID:4159 / skin cancer/HERV9	GE	3269	MU47811875		intergenic_region
Canon	4	93194695	G	A	DOID:4159 / skin cancer/HERVH	GE	1513	MU61797312	RP11-562F9.2	intron_variant
Canon	11	56765844	C	T	DOID:4159 / skin cancer/MER52	GE	3497	MU50265339		intergenic_region
Canon	5	32676469	G	T	DOID:4159 / skin cancer/HERV9	GE	1799	MU49893356		intergenic_region
Canon	4	167444230	C	T	DOID:4159 / skin cancer/HERVH	GE	1687	MU39267287	RP11-217C7.1	intron_variant
Canon	19	22757774	T	C	DOID:4159 / skin cancer/HERVH	GE	4670	MU62097349		intergenic_region
Canon	1	188634562	G	A	DOID:5041 / esophageal cancer/HERVFRD	GE	6139	MU35457783		intergenic_region
Canon	13	56687176	G	A	DOID:1793 / pancreatic cancer/HERVH	GE	3972	MU32329156		intergenic_region
Canon	2	116942172	G	A	DOID:4159 / skin cancer/HERVH	GE	655	MU48254476		intergenic_region
Canon	18	27002174	C	A	DOID:2531 / hematologic cancer/HML5	AB	4527	MU69040156		intergenic_region
Canon	12	61347543	A	T	DOID:5041 / esophageal cancer/HERVH	GE	3816	MU323124		intergenic_region
Canon	3	82698194	C	T	DOID:4159 / skin cancer/MER52	GE	999	MU42153761		intergenic_region
Canon	3	6444744	A	G	DOID:3571 / liver cancer/HERVH	GE	860	MU3605295		intergenic_region
Canon	16	34503695	C	T	DOID:4159 / skin cancer/HERVT	GE	4374	MU54792571	RP11-488I20.8	intron_variant
Canon	6	121250006	A	G	DOID:3571 / liver cancer/HERVH	GE	2314	MU6245112		intergenic_region
Canon	13	87411132	G	A	DOID:2531 / hematologic cancer/HERVFB	GE	4023	MU1480744		intergenic_region
Canon	2	35030007	G	A	DOID:1612 / breast cancer/HERVH	GE	505	MU68457637	AC012593.1	intron_variant
Canon	11	39148306	A	C	DOID:4159 / skin cancer/HERVL	S	3445	MU37053059		intergenic_region
Canon	1	71054832	G	C	DOID:1793 / pancreatic cancer/HERVH	GE	5919	MU5767352		intergenic_region
Canon	2	188065378	C	A	DOID:1324 / lung cancer/HERVL	S	767	MU56308312	AC007319.1	intron_variant
Canon	6	63296826	A	G	DOID:5041 / esophageal cancer/HERVH	GE	2166	MU71049557		intergenic_region
Canon	9	23921482	C	T	DOID:4159 / skin cancer/HERV9	GE	3020	MU50632044		intergenic_region
Canon	5	18540919	C	T	DOID:4159 / skin cancer/HERVH	GE	1766	MU53005099		intergenic_region
Canon	16	62680186	A	C	DOID:5041 / esophageal cancer/MER52	GE	4400	MU26674665		intergenic_region
Canon	2	194995146	C	T	DOID:4159 / skin cancer/HERVH	GE	780	MU57678666		intergenic_region
Canon	11	42905004	G	A	DOID:4159 / skin cancer/HERV9	GE	3452	MU49514575		intergenic_region
Canon	8	39704902	C	T	DOID:4159 / skin cancer/HERVIP	GE	2773	MU61001087		intergenic_region
Canon	1	247868489	G	A	DOID:4159 / skin cancer/HERVL	S	6254	MU52234163	RP11-634B7.4	intron_variant
Canon	17	50653554	G	A	DOID:4159 / skin cancer/MER41	GE	4467	MU58016193		intergenic_region
Canon	5	3951980	C	T	DOID:4159 / skin cancer/HERVL	S	1746	MU55674970		intergenic_region
Canon	12	127102295	G	A	DOID:5041 / esophageal cancer/HERVIP	GE	3913	MU17543546	RP11-407A16.8	upstream_gene_variant
Canon	10	84817715	T	A	DOID:3571 / liver cancer/HERVH	GE	3305	MU6417019		intergenic_region
Canon	13	90318207	A	G	DOID:4159 / skin cancer/PABL	GE	4034	MU35545150		intergenic_region
Canon	2	188070490	G	T	DOID:4159 / skin cancer/HERVL	S	767	MU34545508	AC007319.1	intron_variant
Canon	1	102068739	C	T	DOID:4159 / skin cancer/HERVH	GE	5985	MU56120257		intergenic_region
Canon	8	50334982	C	T	DOID:4159 / skin cancer/HERVH	GE	2814	MU56067265		intergenic_region
Canon	17	50654013	G	A	DOID:4159 / skin cancer/MER41	GE	4467	MU59469313		intergenic_region
Canon	10	84819894	C	T	DOID:4159 / skin cancer/HERVH	GE	3305	MU56862510		intergenic_region
Canon	12	34678683	C	T	DOID:4159 / skin cancer/HML8	AB	3761	MU55380379		intergenic_region
Canon	4	168339741	C	T	DOID:4159 / skin cancer/HUERSP3	GE	1690	MU47361430		intergenic_region
Canon	8	39736065	G	A	DOID:4159 / skin cancer/HERV9	GE	2772	MU54872989		intergenic_region
Canon	1	82823478	G	A	DOID:4159 / skin cancer/HERVH	GE	5945	MU49712422		intergenic_region
Canon	13	87415301	C	T	DOID:4159 / skin cancer/HERVFB	GE	4023	MU54188936		intergenic_region
Canon	21	17352846	G	A	DOID:4159 / skin cancer/HERVH	GE	4864	MU58304025		intergenic_region
Canon	6	130518910	G	A	DOID:4159 / skin cancer/HERVH	GE	2334	MU53029904	SAMD3	intron_variant
Canon	6	57627796	C	A	DOID:5041 / esophageal cancer/HML2	AB	2153	MU18829463		intergenic_region
Canon	8	72582380	A	C	DOID:4159 / skin cancer/HERVH	GE	2855	MU60418068		intergenic_region
Canon	16	35135490	G	A	DOID:4159 / skin cancer/HERVT	GE	4380	MU55609323		intergenic_region
Canon	4	65591727	A	G	DOID:1612 / breast cancer/MER51	GE	1436	MU64602712		intergenic_region
Canon	1	247870076	C	G	DOID:1612 / breast cancer/HERVL	S	6254	MU65607326	OR6F1	downstream_gene_variant
Canon	6	115557274	C	T	DOID:4159 / skin cancer/HERV9	GE	2298	MU58248551		intergenic_region
Canon	4	31608945	A	C	DOID:4159 / skin cancer/HEPSI	GE	1356	MU47255457		intergenic_region
Canon	2	156025	G	T	DOID:4159 / skin cancer/HERVW	GE	460	MU50612226		intergenic_region
Canon	12	127965813	G	T	DOID:1324 / lung cancer/HERVE	GE	3915	MU44379623		intergenic_region
Canon	8	115295397	T	C	DOID:5041 / esophageal cancer/HERVH	GE	2937	MU37230672	RP11-267L5.1	intron_variant
Canon	6	102554534	T	C	DOID:1324 / lung cancer/HERVH	GE	2275	MU45748028		intergenic_region
Canon	4	65597619	C	T	DOID:4159 / skin cancer/MER51	GE	1436	MU49705243		intergenic_region
Canon	3	87660188	G	A	DOID:4159 / skin cancer/HERVIP	GE	1011	MU53945113		intergenic_region
Canon	12	128095286	T	G	DOID:5041 / esophageal cancer/HERV9	GE	3916	MU70679757		intergenic_region
Canon	7	54026869	C	T	DOID:4159 / skin cancer/HERV9	GE	2496	MU56809273		intergenic_region
Canon	3	172877503	C	T	DOID:1793 / pancreatic cancer/HERVH	GE	1237	MU40505360	RP11-324C10.1	intron_variant
Canon	10	59596427	T	A	DOID:5041 / esophageal cancer/HERV9	GE	3269	MU70944806		intergenic_region
Canon	18	40979740	C	T	DOID:4159 / skin cancer/HERVL	S	4550	MU47824706		intergenic_region
Canon	1	181223931	G	A	DOID:4159 / skin cancer/HML8	AB	6122	MU42225107		intergenic_region
Canon	11	81738505	C	T	DOID:4159 / skin cancer/HERVH	GE	3565	MU44425654	RP11-179A16.1	intron_variant
Canon	10	84819251	T	A	DOID:2394 / ovarian cancer/HERVH	GE	3305	MU6173903		intergenic_region
Canon	3	172878656	G	A	DOID:4159 / skin cancer/HERVH	GE	1237	MU58848403	RP11-324C10.1	intron_variant
Canon	11	127642143	G	A	DOID:4159 / skin cancer/HERVH	GE	3672	MU49883296		intergenic_region
Canon	4	20632033	A	G	DOID:1612 / breast cancer/HERVH	GE	1336	MU65296882		intergenic_region
Canon	11	101085739	C	A	DOID:1793 / pancreatic cancer/HML8	AB	3621	MU4703966		intergenic_region
Canon	12	17179826	T	A	DOID:1612 / breast cancer/HERVH	GE	3722	MU68094177		intergenic_region
Canon	13	55630843	T	C	DOID:1793 / pancreatic cancer/HERVW	GE	3967	MU69003057		intergenic_region
Canon	14	80696503	G	A	DOID:4159 / skin cancer/HERVL	S	4189	MU41975820	DIO2	intron_variant
Canon	21	17352276	C	T	DOID:4159 / skin cancer/HERVH	GE	4864	MU61092850		intergenic_region
Canon	1	71968885	C	T	DOID:4159 / skin cancer/HERVADP	GE	5921	MU43355229	NEGR1	intron_variant
Canon	11	38243493	C	A	DOID:1612 / breast cancer/HERVIP	GE	3442	MU66214138		intergenic_region
Canon	6	77206053	C	T	DOID:4159 / skin cancer/HML8	AB	2209	MU53118864		intergenic_region
Canon	8	64835781	T	A	DOID:5041 / esophageal cancer/HERVL	S	2844	MU36831243	RP11-32K4.1	intron_variant
Canon	5	121956343	G	A	DOID:4159 / skin cancer/HERVH	GE	1968	MU59910458		intergenic_region
Canon	3	106642634	A	C	DOID:4159 / skin cancer/HERVH	GE	1056	MU40724343	LINC00882	intron_variant
Canon	4	131765046	C	T	DOID:4159 / skin cancer/HERV9	GE	1600	MU46262064		intergenic_region
Canon	3	6444716	G	A	DOID:4159 / skin cancer/HERVH	GE	860	MU39622683		intergenic_region
Canon	2	52254059	G	A	DOID:4159 / skin cancer/HERVH	GE	534	MU58901411	AC007682.1	intron_variant
Canon	4	63288793	C	T	DOID:4159 / skin cancer/HERVL	S	1422	MU36226486		intergenic_region
Canon	11	29542890	G	C	DOID:1612 / breast cancer/HERV3	GE	3431	MU65243011	RP11-460B17.3	intron_variant
Canon	13	55268230	T	A	DOID:1612 / breast cancer/MER52	GE	3965	MU65084302		intergenic_region
Canon	4	135452651	C	A	DOID:3571 / liver cancer/HEPSI1	GE	1621	MU28712279		intergenic_region
Canon	1	80163589	G	A	DOID:4159 / skin cancer/HERVH	GE	5940	MU43721520		intergenic_region
Canon	6	95263241	C	T	DOID:4159 / skin cancer/HERVH	GE	2263	MU42656557		intergenic_region
Canon	8	5298635	T	C	DOID:5041 / esophageal cancer/HERVH	GE	2687	MU71053857		intergenic_region
Canon	3	82693840	G	T	DOID:5041 / esophageal cancer/MER52	GE	999	MU35606674		intergenic_region
Canon	7	93274135	C	G	DOID:1612 / breast cancer/HERVH	GE	2565	MU67078174	GNGT1	intron_variant
Canon	4	137533194	G	T	DOID:3571 / liver cancer/HERVH	GE	1629	MU3594524		intergenic_region
Canon	3	176225553	C	T	DOID:4159 / skin cancer/HUERSP3	GE	1247	MU62157702		intergenic_region
Canon	4	93197658	G	A	DOID:4159 / skin cancer/HERVH	GE	1513	MU51231400	RP11-562F9.2	intron_variant
Canon	4	168339204	C	T	DOID:4159 / skin cancer/HUERSP3	GE	1690	MU56970660		intergenic_region
Canon	11	127638001	C	T	DOID:8618 / oral cavity cancer/HERVH	GE	3672	MU67650916		intergenic_region
Canon	5	96653096	G	A	DOID:1793 / pancreatic cancer/HERV9	GE	1909	MU30084396	RP11-155G15.2	intron_variant
Canon	8	73305647	A	C	DOID:5041 / esophageal cancer/HERV9	GE	2860	MU70531358		intergenic_region
Canon	12	127966979	C	T	DOID:5041 / esophageal cancer/HERVE	GE	3915	MU36746095		intergenic_region
Canon	18	40977994	G	A	DOID:4159 / skin cancer/HERVL	S	4550	MU38997431		intergenic_region
Canon	5	46006229	T	A	DOID:2394 / ovarian cancer/HML2	AB	1836	MU8231316		intergenic_region
Canon	4	179129676	T	A	DOID:1324 / lung cancer/HERVH	GE	1721	MU52834172		intergenic_region
Canon	7	119652752	T	C	DOID:3571 / liver cancer/HERVH	GE	2609	MU3082591		intergenic_region
Canon	13	56230842	C	G	DOID:1324 / lung cancer/HERVH	GE	3969	MU51667497		intergenic_region
Canon	9	77966339	T	G	DOID:1793 / pancreatic cancer/HERVH	GE	3072	MU8709788		intergenic_region
Canon	11	101086842	C	T	DOID:4159 / skin cancer/HML8	AB	3621	MU55999201		intergenic_region
Canon	5	40110439	G	A	DOID:4159 / skin cancer/HML8	AB	1818	MU50033055		intergenic_region
Canon	11	101090257	G	A	DOID:4159 / skin cancer/HML8	AB	3621	MU57543546		intergenic_region
Canon	4	128194515	C	T	DOID:4159 / skin cancer/HML3	AB	1593	MU47467438	RP11-125O18.1	intron_variant
Canon	12	21106938	G	A	DOID:4159 / skin cancer/HUERSP3	GE	3732	MU42152001	LST3	intron_variant
Canon	11	23958988	C	T	DOID:4159 / skin cancer/HERV9	GE	3420	MU42124412		intergenic_region
Canon	3	26322012	A	C	DOID:5041 / esophageal cancer/HEPSI2	GE	897	MU35743152		intergenic_region
Canon	13	82904745	C	T	DOID:4159 / skin cancer/HUERSP3	GE	4013	MU58517790		intergenic_region
Canon	4	92621950	T	C	DOID:3571 / liver cancer/HML3	AB	1507	MU2773844		intergenic_region
Canon	13	55631926	G	A	DOID:4159 / skin cancer/HERVW	GE	3967	MU40881280		intergenic_region
Canon	11	38248013	G	C	DOID:4159 / skin cancer/HERVIP	GE	3442	MU44536272		intergenic_region
Canon	2	155730499	C	T	DOID:4159 / skin cancer/HERVH	GE	721	MU54344572		intergenic_region
Canon	18	40983428	T	C	DOID:1612 / breast cancer/HERVL	S	4550	MU63833257		intergenic_region
Canon	8	91428732	C	A	DOID:1612 / breast cancer/HERVL	S	2898	MU63416244	LINC00534	intron_variant
Canon	3	162432062	T	C	DOID:1612 / breast cancer/HERVH	GE	1202	MU66479478		intergenic_region
Canon	6	63503125	C	T	DOID:4159 / skin cancer/HERVH	GE	2167	MU57517085		intergenic_region
Canon	14	40364065	G	A	DOID:4159 / skin cancer/HERVL	S	4116	MU51679122		intergenic_region
Canon	2	193784877	C	T	DOID:4159 / skin cancer/HERVH	GE	778	MU61400784		intergenic_region
Canon	1	80167300	G	C	DOID:5041 / esophageal cancer/HERVH	GE	5940	MU18412211		intergenic_region
Canon	2	194995684	T	C	DOID:5041 / esophageal cancer/HERVH	GE	780	MU35498458		intergenic_region
Canon	8	47493150	A	T	DOID:1612 / breast cancer/HML8	AB	2797	MU66482341	ASNSP1	intron_variant
Canon	19	20658213	G	A	DOID:4159 / skin cancer/HERVH48	GE	4644	MU40890901	CTC-513N18.6	intron_variant
Canon	13	56688778	A	G	DOID:263 / kidney cancer/HERVH	GE	3972	MU3928144		intergenic_region
Canon	3	176225151	C	T	DOID:4159 / skin cancer/HUERSP3	GE	1247	MU51467693		intergenic_region
Canon	2	200049775	T	G	DOID:5041 / esophageal cancer/HERVH	GE	788	MU25557922		intergenic_region
Canon	3	146074219	C	T	DOID:4159 / skin cancer/HERVH	GE	1154	MU62363050		intergenic_region
Canon	8	43753098	C	T	DOID:1324 / lung cancer/HML8	AB	2788	MU51155206		intergenic_region
Canon	3	35917803	A	C	DOID:5041 / esophageal cancer/HERVH	GE	917	MU33577636		intergenic_region
Canon	4	179133802	C	T	DOID:4159 / skin cancer/HERVH	GE	1721	MU37047952		intergenic_region
Canon	2	115874066	C	T	DOID:4159 / skin cancer/MER50	GE	654	MU52714574	DPP10	intron_variant
Canon	18	40978469	T	C	DOID:2531 / hematologic cancer/HERVL	S	4550	MU69739042		intergenic_region
Canon	8	47496836	A	T	DOID:4159 / skin cancer/HML8	AB	2797	MU53652891	ASNSP1	intron_variant
Canon	13	90318261	G	A	DOID:1612 / breast cancer/PABL	GE	4034	MU65486222		intergenic_region
Canon	10	42885851	A	C	DOID:5041 / esophageal cancer/HERVFA	GE	3231	MU24718803		intergenic_region
Canon	6	55879821	A	G	DOID:2394 / ovarian cancer/HERVH	GE	2151	MU8725963		intergenic_region
Canon	6	78368524	A	G	DOID:3571 / liver cancer/HERVH	GE	2213	MU47235442		intergenic_region
Canon	10	54711682	G	A	DOID:4159 / skin cancer/HERVT	GE	3253	MU41006014		intergenic_region
Canon	5	100651438	C	T	DOID:2394 / ovarian cancer/HERVH	GE	1922	MU7792509		intergenic_region
Canon	12	128095323	C	A	DOID:5041 / esophageal cancer/HERV9	GE	3916	MU37474734		intergenic_region
Canon	11	96232532	C	T	DOID:4159 / skin cancer/LTR46	GE	3609	MU47458332	JRKL-AS1	intron_variant
Canon	12	127968836	G	A	DOID:4159 / skin cancer/HERVE	GE	3915	MU40825449		intergenic_region
Canon	4	70061574	C	A	DOID:4159 / skin cancer/HML8	AB	1450	MU54118701	UGT2B11	downstream_gene_variant
Canon	3	94016367	A	G	DOID:10283 / prostate cancer/MER65	GE	1024	MU24857974		intergenic_region
Canon	1	188304633	C	A	DOID:1793 / pancreatic cancer/HERVL	S	6135	MU31467090		intergenic_region
Canon	2	52250514	C	T	DOID:1793 / pancreatic cancer/HERVH	GE	534	MU28741816	AC007682.1	intron_variant
Canon	12	39325276	G	T	DOID:2531 / hematologic cancer/HERVIP	GE	3770	MU67965030		intergenic_region
Canon	17	50657610	G	T	DOID:1324 / lung cancer/MER41	GE	4467	MU62883864		intergenic_region
Canon	12	118092956	T	C	DOID:4159 / skin cancer/HERVL	S	3906	MU41362958	KSR2	intron_variant
Canon	4	168339553	C	G	DOID:10283 / prostate cancer/HUERSP3	GE	1690	MU31991028		intergenic_region
Canon	17	50660581	G	A	DOID:4159 / skin cancer/MER41	GE	4467	MU59972172		intergenic_region
Canon	1	191208743	T	G	DOID:1793 / pancreatic cancer/HERVL	S	6143	MU5206954		intergenic_region
Canon	5	28049084	C	T	DOID:4159 / skin cancer/HERVH	GE	1788	MU62029524		intergenic_region
Canon	11	39150418	G	A	DOID:4159 / skin cancer/HERVL	S	3445	MU41703739		intergenic_region
Canon	4	128437233	G	C	DOID:1612 / breast cancer/HERVH	GE	1594	MU2032162		intergenic_region
Canon	3	96387943	C	T	DOID:4159 / skin cancer/HERVW	GE	1032	MU62901694		intergenic_region
Canon	5	114328151	C	G	DOID:4159 / skin cancer/HERV9	GE	1954	MU47684779		intergenic_region
Canon	9	121252488	C	A	DOID:5041 / esophageal cancer/HERVH	GE	3155	MU20879007		intergenic_region
Canon	7	82271458	G	A	DOID:4159 / skin cancer/HERV9	GE	2542	MU55475384		intergenic_region
Canon	8	54396932	C	T	DOID:4159 / skin cancer/HERVS	S	2826	MU50178994		intergenic_region
Canon	5	12667308	G	A	DOID:4159 / skin cancer/HERVH	GE	1758	MU59608050	CT49	intron_variant
Canon	1	188641088	A	T	DOID:1793 / pancreatic cancer/HERVFRD	GE	6139	MU5172887		intergenic_region
Canon	8	50345312	C	T	DOID:4159 / skin cancer/HERV9	GE	2813	MU55454847		intergenic_region
Canon	3	97967790	G	A	DOID:4159 / skin cancer/HERVH	GE	1036	MU58554670	RP11-325B23.2	intron_variant
Canon	8	43413442	C	T	DOID:5041 / esophageal cancer/HERVT	GE	2781	MU15415655		intergenic_region
Canon	13	55632266	G	A	DOID:4159 / skin cancer/HERVW	GE	3967	MU41245151		intergenic_region
Canon	1	5105668	G	A	DOID:4159 / skin cancer/HERVH	GE	5811	MU54662087		intergenic_region
Canon	2	195019631	C	T	DOID:1324 / lung cancer/HERVADP	GE	782	MU44956329		intergenic_region
Canon	3	82695445	G	A	DOID:4159 / skin cancer/MER52	GE	999	MU48166193		intergenic_region
Canon	16	65308796	G	T	DOID:1319 / brain cancer/HERVH	GE	4405	MU68231203	RP11-256I9.3	intron_variant
Canon	4	135452825	G	A	DOID:4159 / skin cancer/HEPSI1	GE	1621	MU46305539		intergenic_region
Canon	5	12667507	G	A	DOID:4159 / skin cancer/HERVH	GE	1758	MU58056637	CT49	intron_variant
Canon	3	164058100	T	C	DOID:1612 / breast cancer/HERVT	GE	1211	COSN20748554	.	.
Canon	4	163632761	C	T	DOID:4159 / skin cancer/HERVH	GE	1676	MU59898568		intergenic_region
Canon	6	130514508	C	T	DOID:5041 / esophageal cancer/HERVH	GE	2334	MU17989498	SAMD3	intron_variant
Canon	8	43409325	G	A	DOID:4159 / skin cancer/HERVT	GE	2781	MU48465033		intergenic_region
Canon	19	20688028	T	C	DOID:5041 / esophageal cancer/HML8	AB	4642	MU33969820	CTC-513N18.6	intron_variant
Canon	12	118092261	G	A	DOID:4159 / skin cancer/HERVL	S	3906	MU55653324	KSR2	intron_variant
Canon	11	96240348	T	C	DOID:3571 / liver cancer/LTR46	GE	3609	COSN1140193	.	SNP
Canon	18	27722347	T	G	DOID:5041 / esophageal cancer/MER51	GE	4529	MU37181553		intergenic_region
Canon	3	21232632	G	A	DOID:4159 / skin cancer/HERVH	GE	890	MU61642578		intergenic_region
Canon	11	80747486	C	A	DOID:2531 / hematologic cancer/HML5	AB	3557	MU1460082		intergenic_region
Canon	5	121956167	G	A	DOID:4159 / skin cancer/HERVH	GE	1968	MU40992933		intergenic_region
Canon	12	34419282	G	A	DOID:4159 / skin cancer/HERVH	GE	3760	MU44169012		intergenic_region
Canon	18	1856176	C	A	DOID:1324 / lung cancer/HERVL	S	4494	MU63268746		intergenic_region
Canon	6	119719661	G	A	DOID:4159 / skin cancer/MER52	GE	2310	MU52958642		intergenic_region
Canon	8	43413351	A	T	DOID:5041 / esophageal cancer/HERVT	GE	2781	MU34271854		intergenic_region
Canon	13	56229176	G	A	DOID:4159 / skin cancer/HERVH	GE	3969	MU32948036		intergenic_region
Canon	7	118824801	C	T	DOID:4159 / skin cancer/HERVL	S	2605	MU54296373		intergenic_region
Canon	8	91425667	C	T	DOID:4159 / skin cancer/HERVL	S	2898	MU56072483	LINC00534	intron_variant
Canon	2	76801264	G	A	DOID:4159 / skin cancer/HERVH	GE	580	MU7105813		intergenic_region
Canon	12	118092335	G	A	DOID:4159 / skin cancer/HERVL	S	3906	MU48794886	KSR2	intron_variant
Canon	2	77317746	C	T	DOID:4159 / skin cancer/HERVH	GE	582	MU59309373	LRRTM4	intron_variant
Canon	21	17354743	G	A	DOID:4159 / skin cancer/HERVH	GE	4864	MU47472467		intergenic_region
Canon	12	78874240	C	A	DOID:3571 / liver cancer/HERVIP	GE	3846	MU2468080	RP11-171L9.1	intron_variant
Canon	5	135906739	G	A	DOID:4159 / skin cancer/HERVH	GE	2000	MU59843188		intergenic_region
Canon	11	49345886	G	T	DOID:4159 / skin cancer/HERVH	GE	3466	MU49014109	CTD-2026G22.1	intron_variant
Canon	5	46000620	C	A	DOID:1793 / pancreatic cancer/HML2	AB	1836	MU5705703		intergenic_region
Canon	1	80162289	C	T	DOID:4159 / skin cancer/HERVH	GE	5940	MU47309063		intergenic_region
Canon	3	166986288	T	A	DOID:4159 / skin cancer/HERVIP	GE	1224	MU40761777	ZBBX	intron_variant
Canon	3	94012640	G	A	DOID:4159 / skin cancer/MER65	GE	1024	MU50711730		intergenic_region
Canon	8	132756552	A	C	DOID:5041 / esophageal cancer/HERVH	GE	2963	MU36464875		intergenic_region
Canon	5	121956523	G	C	DOID:1612 / breast cancer/HERVH	GE	1968	MU2177069		intergenic_region
Canon	7	118830733	T	C	DOID:1793 / pancreatic cancer/HERVL	S	2605	MU68992843		intergenic_region
Canon	3	146073997	G	A	DOID:4159 / skin cancer/HERVH	GE	1154	MU62471807		intergenic_region
Canon	1	188639625	T	C	DOID:4159 / skin cancer/HERVFRD	GE	6139	MU49722065		intergenic_region
Canon	13	56687721	T	C	DOID:2531 / hematologic cancer/HERVH	GE	3972	MU46726504		intergenic_region
Canon	14	41706486	G	T	DOID:1612 / breast cancer/HERVL	S	4118	MU66888113		intergenic_region
Canon	6	121251515	C	T	DOID:4159 / skin cancer/HERVH	GE	2314	MU49095293		intergenic_region
Canon	3	103314471	C	G	DOID:10283 / prostate cancer/HERVL	S	1049	MU31561297		intergenic_region
Canon	6	115561618	C	T	DOID:4159 / skin cancer/HERV9	GE	2298	MU50477133		intergenic_region
Canon	3	164059124	C	T	DOID:2531 / hematologic cancer/HERVT	GE	1211	MU28553058		intergenic_region
Canon	4	171599044	C	T	DOID:4159 / skin cancer/HERVH	GE	1702	MU44137575		intergenic_region
Canon	18	1858049	G	A	DOID:4159 / skin cancer/HERVL	S	4494	MU53200070		intergenic_region
Canon	4	137533027	C	T	DOID:4159 / skin cancer/HERVH	GE	1629	MU52767652		intergenic_region
Canon	11	123740471	G	A	DOID:4159 / skin cancer/HERVH	GE	3663	MU58057895		intergenic_region
Canon	10	96528697	C	T	DOID:4159 / skin cancer/HERV9	GE	3326	MU41004642	CYP2C19	intron_variant
Canon	18	27716461	C	G	DOID:4159 / skin cancer/MER51	GE	4529	MU48434217		intergenic_region
Canon	16	34503177	G	T	DOID:1793 / pancreatic cancer/HERVT	GE	4374	MU9090742	RP11-488I20.8	intron_variant
Canon	3	164061544	C	T	DOID:263 / kidney cancer/HERVH	GE	1212	MU4116887		intergenic_region
Canon	18	41093951	G	A	DOID:4159 / skin cancer/HERVIP	GE	4551	MU34026602		intergenic_region
Canon	6	62036758	G	A	DOID:1793 / pancreatic cancer/MER52	GE	2161	MU21170352		intergenic_region
Canon	11	23963086	C	T	DOID:4159 / skin cancer/HERV9	GE	3420	MU48057891		intergenic_region
Canon	11	81741438	C	G	DOID:1324 / lung cancer/HERVH	GE	3565	MU42603595	RP11-179A16.1	intron_variant
Canon	6	78216557	C	T	DOID:4159 / skin cancer/HUERSP3	GE	2211	MU52190138		intergenic_region
Canon	6	63502594	C	T	DOID:4159 / skin cancer/HERVH	GE	2167	MU53312292		intergenic_region
Canon	19	55409157	G	A	DOID:4159 / skin cancer/HERVH	GE	4783	MU49123683		intergenic_region
Canon	12	78872865	G	A	DOID:4159 / skin cancer/HERVIP	GE	3846	MU59160547	RP11-171L9.1	intron_variant
Canon	11	81522362	C	T	DOID:4159 / skin cancer/HERVH	GE	3562	MU61582897		intergenic_region
Canon	11	81738735	G	A	DOID:4159 / skin cancer/HERVH	GE	3565	MU71409929	RP11-179A16.1	intron_variant
Canon	6	119718804	G	A	DOID:4159 / skin cancer/MER52	GE	2310	MU57524051		intergenic_region
Canon	3	36175997	C	T	DOID:4159 / skin cancer/MER52	GE	918	MU51338028		intergenic_region
Canon	8	50332564	C	T	DOID:4159 / skin cancer/HERVH	GE	2814	MU41287486		intergenic_region
Canon	3	176044430	A	G	DOID:10283 / prostate cancer/HERVH	GE	1246	MU67387654		intergenic_region
Canon	2	148074430	G	A	DOID:4159 / skin cancer/HERV9	GE	702	MU62147168		intergenic_region
Canon	4	137537107	C	A	DOID:1324 / lung cancer/HERVH	GE	1629	MU58498469		intergenic_region
Canon	19	20706051	G	A	DOID:4159 / skin cancer/HERVH	GE	4645	MU47981418	CTC-513N18.6	intron_variant
Canon	5	114333060	C	T	DOID:4159 / skin cancer/HERV9	GE	1954	MU42060442		intergenic_region
Canon	1	80166732	G	A	DOID:1793 / pancreatic cancer/HERVH	GE	5940	MU64427873		intergenic_region
Canon	13	56688081	G	A	DOID:4159 / skin cancer/HERVH	GE	3972	MU62799955		intergenic_region
Canon	17	50651494	T	G	DOID:5041 / esophageal cancer/MER41	GE	4467	MU19198698		intergenic_region
Canon	3	163741085	C	A	DOID:3571 / liver cancer/HERVFB	GE	1209	MU31290787		intergenic_region
Canon	10	107779637	G	A	DOID:4159 / skin cancer/HERVH	GE	3349	MU49775963		intergenic_region
Canon	12	17177892	G	A	DOID:4159 / skin cancer/HERVH	GE	3722	MU21181701		intergenic_region
Canon	1	247873159	T	C	DOID:1793 / pancreatic cancer/HERVL	S	6254	MU64051028	OR6F1	downstream_gene_variant
Canon	8	73305699	C	T	DOID:4159 / skin cancer/HERV9	GE	2860	MU44026871		intergenic_region
Canon	8	72577809	C	T	DOID:1612 / breast cancer/HERVH	GE	2855	MU64538162		intergenic_region
Canon	8	84421370	G	A	DOID:4159 / skin cancer/HERVH	GE	2876	MU57652622		intergenic_region
Canon	12	128102404	C	G	DOID:2531 / hematologic cancer/HERV9	GE	3916	MU68598089		intergenic_region
Canon	5	32673423	G	A	DOID:4159 / skin cancer/HERV9	GE	1799	MU45965686		intergenic_region
Canon	12	34681723	G	A	DOID:4159 / skin cancer/HML8	AB	3761	MU58992304		intergenic_region
Canon	4	179129183	C	T	DOID:4159 / skin cancer/HERVH	GE	1721	MU49074540		intergenic_region
Canon	12	128101928	T	C	DOID:1612 / breast cancer/HERV9	GE	3916	MU68482811		intergenic_region
Canon	9	121247911	T	G	DOID:5041 / esophageal cancer/HERVH	GE	3155	MU28457529		intergenic_region
Canon	7	88174776	G	A	DOID:8618 / oral cavity cancer/HUERSP3	GE	2552	MU39844729		intergenic_region
Canon	3	172874212	C	T	DOID:4159 / skin cancer/HERVH	GE	1237	MU46298650	RP11-324C10.1	intron_variant
Canon	4	128436071	T	C	DOID:3571 / liver cancer/HERVH	GE	1594	MU2617013		intergenic_region
Canon	6	77205746	T	G	DOID:2394 / ovarian cancer/HML8	AB	2209	MU8816006		intergenic_region
Canon	12	114503259	C	T	DOID:4159 / skin cancer/HERVIP	GE	3905	MU37838129		intergenic_region
Canon	2	143248359	C	A	DOID:4159 / skin cancer/HERVH	GE	697	MU58703979		intergenic_region
Canon	3	94017428	T	C	DOID:4159 / skin cancer/MER65	GE	1024	MU55858620		intergenic_region
Canon	3	87659746	G	T	DOID:10283 / prostate cancer/HERVIP	GE	1011	MU31842863		intergenic_region
Canon	12	34419602	T	A	DOID:4159 / skin cancer/HERVH	GE	3760	MU51394691		intergenic_region
Canon	3	97966516	C	T	DOID:4159 / skin cancer/HERVH	GE	1036	MU52605037	RP11-325B23.2	intron_variant
Canon	6	98616324	C	T	DOID:4159 / skin cancer/HERVL	S	2267	MU61677692	RP11-436D23.1	intron_variant
Canon	4	92621463	G	A	DOID:4159 / skin cancer/HML3	AB	1507	MU47852425		intergenic_region
Canon	18	27001190	G	A	DOID:4159 / skin cancer/HML5	AB	4527	MU58961190		intergenic_region
Canon	4	137536865	G	A	DOID:4159 / skin cancer/HERVH	GE	1629	MU60527596		intergenic_region
Canon	7	85722102	A	G	DOID:3571 / liver cancer/HERVL	S	2548	MU7439923		intergenic_region
Canon	13	72593828	C	T	DOID:4159 / skin cancer/HERVS	S	3999	MU46644719		intergenic_region
Canon	8	65034963	A	C	DOID:5041 / esophageal cancer/HERVL	S	2845	MU34097647	RP11-32K4.1	intron_variant
Canon	1	188639521	G	A	DOID:4159 / skin cancer/HERVFRD	GE	6139	MU47102086		intergenic_region
Canon	7	138051424	C	T	DOID:4159 / skin cancer/HERVH	GE	2645	MU60709943		intergenic_region
Canon	16	34506120	T	C	DOID:5041 / esophageal cancer/HERVT	GE	4374	MU15729141	AC007353.1	upstream_gene_variant
Canon	6	78301681	T	G	DOID:4159 / skin cancer/HERVL	S	2212	MU42241335		intergenic_region
Canon	2	115878726	G	A	DOID:4159 / skin cancer/MER50	GE	654	MU54174452	DPP10	intron_variant
Canon	14	87200738	C	T	DOID:4159 / skin cancer/HERVH	GE	4201	MU51128585		intergenic_region
Canon	3	148136055	A	T	DOID:2394 / ovarian cancer/HERVH	GE	1162	MU6446672		intergenic_region
Canon	13	91492741	C	T	DOID:4159 / skin cancer/HERVH	GE	4039	MU44636646		intergenic_region
Canon	4	70060435	G	A	DOID:4159 / skin cancer/HML8	AB	1450	MU44695245	RP11-704M14.1	intron_variant
Canon	7	119700688	A	T	DOID:5041 / esophageal cancer/HERV3	GE	2608	MU200064		intergenic_region
Canon	6	115561227	C	T	DOID:4159 / skin cancer/HERV9	GE	2298	MU6218155		intergenic_region
Canon	10	59599381	C	T	DOID:4159 / skin cancer/HERV9	GE	3269	MU43061236		intergenic_region
Canon	8	39733990	G	T	DOID:5041 / esophageal cancer/HERV9	GE	2772	MU21431094		intergenic_region
Canon	6	58745522	G	A	DOID:4159 / skin cancer/HML3	AB	2156	MU67739545		intergenic_region
Canon	2	79439062	T	A	DOID:263 / kidney cancer/HERVH	GE	588	MU3946850	CTNNA2	intron_variant
Canon	12	21101772	G	A	DOID:4159 / skin cancer/HUERSP3	GE	3732	MU40001666	LST3	intron_variant
Canon	3	162442414	G	C	DOID:2531 / hematologic cancer/HERVH	GE	1203	MU68032799		intergenic_region
Canon	2	79281433	C	T	DOID:4159 / skin cancer/HERVH	GE	586	MU53838253		intergenic_region
Canon	9	77968797	A	T	DOID:8618 / oral cavity cancer/HERVH	GE	3072	MU67761752		intergenic_region
Canon	3	163625750	G	A	DOID:4159 / skin cancer/HERVH	GE	1208	MU50227651		intergenic_region
Canon	4	65594018	A	G	DOID:5041 / esophageal cancer/MER51	GE	1436	MU70490737		intergenic_region
Canon	3	26320716	T	A	DOID:4159 / skin cancer/HEPSI2	GE	897	MU60666569		intergenic_region
Canon	3	36175836	C	T	DOID:4159 / skin cancer/MER52	GE	918	MU44914085		intergenic_region
Canon	2	78061093	T	A	DOID:4159 / skin cancer/MER50	GE	583	MU41391112		intergenic_region
Canon	12	114508065	C	T	DOID:4159 / skin cancer/HERVIP	GE	3905	MU34149679		intergenic_region
Canon	11	39147676	G	A	DOID:4159 / skin cancer/HERVL	S	3445	MU55284104		intergenic_region
Canon	11	38244103	C	T	DOID:4159 / skin cancer/HERVIP	GE	3442	MU39321737		intergenic_region
Canon	1	191208026	G	A	DOID:1612 / breast cancer/HERVL	S	6143	MU66179677		intergenic_region
Canon	4	131767664	C	T	DOID:4159 / skin cancer/HERV9	GE	1600	MU44866780		intergenic_region
Canon	8	47499571	C	T	DOID:4159 / skin cancer/HML8	AB	2797	MU45411782	ASNSP1	intron_variant
Canon	11	127638188	G	C	DOID:3571 / liver cancer/HERVH	GE	3672	MU28643186		intergenic_region
Canon	3	145271533	G	A	DOID:4159 / skin cancer/HERVH	GE	1151	MU54503002		intergenic_region
Canon	11	127640391	T	A	DOID:5041 / esophageal cancer/HERVH	GE	3672	MU70430968		intergenic_region
Canon	7	54027490	G	A	DOID:4159 / skin cancer/HERV9	GE	2496	MU44686636		intergenic_region
Canon	3	106643033	C	T	DOID:4159 / skin cancer/HERVH	GE	1056	MU51439529	LINC00882	intron_variant
Canon	4	44996214	C	T	DOID:4159 / skin cancer/HERVFRD	GE	1388	MU33714072		intergenic_region
Canon	18	49483672	C	T	DOID:4159 / skin cancer/ERV1_ARTIODACT	GE	4562	MU50430912		intergenic_region
Canon	8	138295658	A	G	DOID:3571 / liver cancer/HERVH48	GE	2970	MU31523259		intergenic_region
Canon	3	26322189	C	T	DOID:4159 / skin cancer/HEPSI2	GE	897	MU57061441		intergenic_region
Canon	2	81106457	G	A	DOID:5041 / esophageal cancer/HERVH	GE	591	MU68710633		intergenic_region
Canon	7	85371599	T	G	DOID:5041 / esophageal cancer/HERVIP	GE	2547	MU15247196		intergenic_region
Canon	11	80747470	C	T	DOID:4159 / skin cancer/HML5	AB	3557	MU40752884		intergenic_region
Canon	6	103081050	G	A	DOID:3571 / liver cancer/MER51	GE	2277	MU3696316		intergenic_region
Canon	8	47492653	G	A	DOID:4159 / skin cancer/HML8	AB	2797	MU44151869	ASNSP1	intron_variant
Canon	18	57399587	G	A	DOID:4159 / skin cancer/ERV1_ARTIODACT	GE	4572	MU34044081		intergenic_region
Canon	8	43414040	G	C	DOID:5041 / esophageal cancer/HERVT	GE	2781	MU26327379		intergenic_region
Canon	4	134875775	T	C	DOID:5041 / esophageal cancer/HERVADP	GE	1617	MU70214596	RP11-427M20.1	intron_variant
Canon	1	241598401	C	T	DOID:4159 / skin cancer/HERVH	GE	6234	MU34561691		intergenic_region
Canon	8	132753999	G	A	DOID:1793 / pancreatic cancer/HERVH	GE	2963	COSN8067068	.	.
Canon	12	17455949	G	A	DOID:4159 / skin cancer/HERVE	GE	3723	MU51846013		intergenic_region
Canon	9	118605659	C	G	DOID:1324 / lung cancer/HERVH	GE	3151	MU50706409		intergenic_region
Canon	7	85718640	T	G	DOID:5041 / esophageal cancer/HERVL	S	2548	MU68255190		intergenic_region
Canon	10	96526201	G	A	DOID:4159 / skin cancer/HERV9	GE	3326	MU57619013	CYP2C19	intron_variant
Canon	19	24507995	C	T	DOID:10283 / prostate cancer/HML8	AB	4687	MU31381222		intergenic_region
Canon	8	54051590	A	G	DOID:5041 / esophageal cancer/HERV9	GE	2822	MU27363916		intergenic_region
Canon	11	81708918	G	A	DOID:4159 / skin cancer/MER52	GE	3564	MU61519015	RP11-179A16.1	intron_variant
Canon	8	47493469	C	T	DOID:4159 / skin cancer/HML8	AB	2797	MU60232721	ASNSP1	intron_variant
Canon	3	35916225	G	A	DOID:4159 / skin cancer/HERVH	GE	917	MU46811706		intergenic_region
Canon	4	179129642	C	T	DOID:1324 / lung cancer/HERVH	GE	1721	MU63244668		intergenic_region
Canon	11	80908641	G	A	DOID:4159 / skin cancer/HERVADP	GE	3558	MU56234339		intergenic_region
Canon	5	46002095	T	C	DOID:10283 / prostate cancer/HML2	AB	1836	MU15020663		intergenic_region
Canon	14	41709394	G	A	DOID:5041 / esophageal cancer/HERVL	S	4118	MU15676085		intergenic_region
Canon	6	29216433	G	A	DOID:4159 / skin cancer/HERVH	GE	2107	MU55900758	XXbac-BPG308J9.3	intron_variant
Canon	7	120420049	G	A	DOID:1793 / pancreatic cancer/HERVH	GE	2611	MU7018371		intergenic_region
Canon	21	18268607	C	T	DOID:4159 / skin cancer/HERVH	GE	4866	MU53204968		intergenic_region
Canon	6	98618676	T	A	DOID:5041 / esophageal cancer/HERVL	S	2267	MU23461663	RP11-436D23.1	intron_variant
Canon	5	46009154	G	A	DOID:4159 / skin cancer/HML2	AB	1836	MU48142790		intergenic_region
Canon	17	50658838	A	T	DOID:4159 / skin cancer/MER41	GE	4467	MU61037865		intergenic_region
Canon	18	1859576	A	T	DOID:4159 / skin cancer/HERVL	S	4494	MU61491762		intergenic_region
Canon	10	37569636	G	A	DOID:5041 / esophageal cancer/HERV9	GE	3224	MU69940466	ATP8A2P1	intron_variant
Canon	2	229168065	C	T	DOID:4159 / skin cancer/HUERSP3	GE	833	MU44033724		intergenic_region
Canon	11	133497187	A	C	DOID:5041 / esophageal cancer/HERVH	GE	3677	MU68884192		intergenic_region
Canon	11	81715689	G	A	DOID:4159 / skin cancer/MER52	GE	3564	MU49799779	RP11-179A16.1	intron_variant
Canon	6	103080330	C	T	DOID:4159 / skin cancer/MER51	GE	2277	MU54264898		intergenic_region
Canon	2	148071068	G	A	DOID:4159 / skin cancer/HERV9	GE	702	MU53383225		intergenic_region
Canon	2	79321674	A	G	DOID:4159 / skin cancer/HERVH48	GE	587	MU41810083		intergenic_region
Canon	8	5735013	G	A	DOID:4159 / skin cancer/HML5	AB	2691	MU47947847		intergenic_region
Canon	12	82299043	G	A	DOID:4159 / skin cancer/HERV9	GE	3853	MU49226533		intergenic_region
Canon	13	72597802	G	T	DOID:1612 / breast cancer/HERVS	S	3999	MU64806352		intergenic_region
Canon	12	34422518	C	T	DOID:4159 / skin cancer/HERVH	GE	3760	MU63142638		intergenic_region
Canon	8	69802978	G	A	DOID:1793 / pancreatic cancer/HML3	AB	2850	MU29862045		intergenic_region
Canon	5	45800667	C	A	DOID:1612 / breast cancer/MER52	GE	1834	MU63698088		intergenic_region
Canon	1	118771426	G	C	DOID:1612 / breast cancer/HERV9	GE	6029	MU65968694		intergenic_region
Canon	11	49344913	G	A	DOID:4159 / skin cancer/HERVH	GE	3466	MU50701791	CTD-2026G22.1	intron_variant
Canon	1	82823920	T	C	DOID:5041 / esophageal cancer/HERVH	GE	5945	MU33894510		intergenic_region
Canon	4	118174000	G	A	DOID:4159 / skin cancer/HERVH	GE	1577	MU60944181		intergenic_region
Canon	4	59159709	G	A	DOID:4159 / skin cancer/HERVH	GE	1414	MU46029197		intergenic_region
Canon	11	80911423	C	A	DOID:5041 / esophageal cancer/HERVADP	GE	3558	MU70264963		intergenic_region
Canon	3	74924517	C	T	DOID:4159 / skin cancer/HERVW	GE	981	MU40898802		intergenic_region
Canon	4	128436928	T	A	DOID:5041 / esophageal cancer/HERVH	GE	1594	MU70415530		intergenic_region
Canon	4	19889186	C	T	DOID:1324 / lung cancer/HERVH48	GE	1334	MU50720919	RP11-608O21.1	intron_variant
Canon	6	63300123	A	G	DOID:5041 / esophageal cancer/HERVH	GE	2166	MU289975		intergenic_region
Canon	3	176227750	C	T	DOID:4159 / skin cancer/HUERSP3	GE	1247	MU43514085		intergenic_region
Canon	3	167153325	G	A	DOID:4159 / skin cancer/HERVH	GE	1226	MU38212613		intergenic_region
Canon	10	54708838	C	T	DOID:4159 / skin cancer/HERVT	GE	3253	MU41192894		intergenic_region
Canon	8	84418674	A	G	DOID:3571 / liver cancer/HERVH	GE	2876	MU46497433		intergenic_region
Canon	4	163633547	C	T	DOID:4159 / skin cancer/HERVH	GE	1676	MU43835179		intergenic_region
Canon	2	200049051	T	G	DOID:3571 / liver cancer/HERVH	GE	788	MU4639373		intergenic_region
Canon	16	7868631	C	T	DOID:4159 / skin cancer/HERVH	GE	4334	MU55951262		intergenic_region
Canon	3	148133207	C	T	DOID:4159 / skin cancer/HERVH	GE	1162	MU50924525		intergenic_region
Canon	10	96531564	C	T	DOID:4159 / skin cancer/HERV9	GE	3326	MU54283569	CYP2C19	intron_variant
Canon	8	35810626	G	A	DOID:4159 / skin cancer/HERVE	GE	2763	MU62682823	RP11-473J6.1	intron_variant
Canon	2	35027581	T	C	DOID:5041 / esophageal cancer/HERVH	GE	505	MU70730541	AC012593.1	intron_variant
Canon	11	127643718	G	A	DOID:1612 / breast cancer/HERVH	GE	3672	MU66849901		intergenic_region
Canon	10	96525042	G	A	DOID:4159 / skin cancer/HERV9	GE	3326	MU54688639	CYP2C19	intron_variant
Canon	10	42884305	G	A	DOID:4159 / skin cancer/HERVFA	GE	3231	MU33290170		intergenic_region
Canon	13	82902982	G	A	DOID:4159 / skin cancer/HUERSP3	GE	4013	MU43630749		intergenic_region
Canon	6	63793203	C	T	DOID:4159 / skin cancer/HERV9	GE	2169	MU50444816		intergenic_region
Canon	3	26318663	A	T	DOID:4159 / skin cancer/HEPSI2	GE	897	MU59097858		intergenic_region
Canon	8	73305896	C	T	DOID:4159 / skin cancer/HERV9	GE	2860	MU38808440		intergenic_region
Canon	4	63920116	A	C	DOID:5041 / esophageal cancer/HERV9	GE	1425	MU17906768		intergenic_region
Canon	18	27722698	G	A	DOID:4159 / skin cancer/MER51	GE	4529	MU37970007		intergenic_region
Canon	3	162442043	G	T	DOID:3571 / liver cancer/HERVH	GE	1203	MU2726879		intergenic_region
Canon	4	35341706	C	T	DOID:4159 / skin cancer/HERVL	S	1370	MU46200181		intergenic_region
Canon	3	97965091	G	A	DOID:4159 / skin cancer/HERVH	GE	1036	MU49886235	RP11-325B23.2	intron_variant
Canon	4	45611917	A	G	DOID:4159 / skin cancer/HERVH48	GE	1393	MU43464832		intergenic_region
Canon	3	95306802	C	T	DOID:2531 / hematologic cancer/HERV9	GE	1027	MU1441812		intergenic_region
Canon	3	166542788	A	C	DOID:1612 / breast cancer/HERVH	GE	1220	MU65138847		intergenic_region
Canon	18	1858839	A	T	DOID:5041 / esophageal cancer/HERVL	S	4494	MU68390029		intergenic_region
Canon	4	33733796	G	T	DOID:4159 / skin cancer/HERVL	S	1362	MU44471232		intergenic_region
Canon	1	79346460	C	T	DOID:3571 / liver cancer/HERVH	GE	5937	MU30733529		intergenic_region
Canon	4	137536723	C	T	DOID:4159 / skin cancer/HERVH	GE	1629	MU61733494		intergenic_region
Canon	13	87417083	A	G	DOID:4159 / skin cancer/HERVFB	GE	4023	MU42445805		intergenic_region
Canon	19	22755934	G	A	DOID:2394 / ovarian cancer/HERVH	GE	4670	MU8851112		intergenic_region
Canon	9	23918560	G	A	DOID:4159 / skin cancer/HERV9	GE	3020	MU62292363		intergenic_region
Canon	21	18265678	A	G	DOID:5041 / esophageal cancer/HERVH	GE	4866	MU18434502		intergenic_region
Canon	12	34681762	G	A	DOID:4159 / skin cancer/HML8	AB	3761	MU57933279		intergenic_region
Canon	6	62314521	G	A	DOID:4159 / skin cancer/HERVH	GE	2164	MU44344288		intergenic_region
Canon	21	18265423	C	T	DOID:4159 / skin cancer/HERVH	GE	4866	MU42828347		intergenic_region
Canon	11	39757483	C	T	DOID:4159 / skin cancer/HERVH	GE	3449	MU42363897		intergenic_region
Canon	11	39762328	C	T	DOID:4159 / skin cancer/HERVH	GE	3449	MU57890318		intergenic_region
Canon	8	91422145	C	T	DOID:4159 / skin cancer/HERVL	S	2898	MU39891989	LINC00534	intron_variant
Canon	4	16999649	C	T	DOID:4159 / skin cancer/HERVH	GE	1329	MU41443108	RP11-141E13.1	intron_variant
Canon	5	103404393	A	G	DOID:4159 / skin cancer/HERVH	GE	1925	MU34914970		intergenic_region
Canon	11	132249925	G	A	DOID:1319 / brain cancer/HERVL	S	3676	MU68941264		intergenic_region
Canon	6	29220209	C	T	DOID:4159 / skin cancer/HERVH	GE	2107	MU41286080	XXbac-BPG308J9.3	intron_variant
Canon	2	116942860	G	A	DOID:4159 / skin cancer/HERVH	GE	655	MU52176402		intergenic_region
Canon	18	40981130	G	A	DOID:4159 / skin cancer/HERVL	S	4550	MU44175893		intergenic_region
Canon	13	63788746	G	A	DOID:4159 / skin cancer/HERVH	GE	3979	MU48389661	LINC00376	intron_variant
Canon	12	118094570	C	T	DOID:4159 / skin cancer/HERVL	S	3906	MU34030899	KSR2	intron_variant
Canon	13	90317907	G	A	DOID:4159 / skin cancer/PABL	GE	4034	MU51728535		intergenic_region
Canon	12	34420537	C	T	DOID:4159 / skin cancer/HERVH	GE	3760	MU59998978		intergenic_region
Canon	8	50336708	C	A	DOID:2394 / ovarian cancer/HERVH	GE	2814	MU5585423		intergenic_region
Canon	12	34680901	T	A	DOID:4159 / skin cancer/HML8	AB	3761	MU50054095		intergenic_region
Canon	5	49667298	C	T	DOID:4159 / skin cancer/HERV9	GE	1841	MU56852667		intergenic_region
Canon	6	77204964	C	T	DOID:4159 / skin cancer/HML8	AB	2209	MU59915627		intergenic_region
Canon	6	57620510	C	T	DOID:4159 / skin cancer/HML2	AB	2153	MU42441510		intergenic_region
Canon	2	79322314	C	T	DOID:1612 / breast cancer/HERVH48	GE	587	MU66871739		intergenic_region
Canon	6	77203714	G	A	DOID:4159 / skin cancer/HML8	AB	2209	MU58849121		intergenic_region
Canon	3	103319277	G	C	DOID:4159 / skin cancer/HERVL	S	1049	MU56417930		intergenic_region
Canon	18	27720988	T	A	DOID:5041 / esophageal cancer/MER51	GE	4529	MU70992407		intergenic_region
Canon	5	135906075	T	C	DOID:5041 / esophageal cancer/HERVH	GE	2000	MU34607580		intergenic_region
Canon	6	77202986	C	T	DOID:4159 / skin cancer/HML8	AB	2209	MU58536091		intergenic_region
Canon	7	118828168	T	G	DOID:4159 / skin cancer/HERVL	S	2605	MU54142146		intergenic_region
Canon	3	163741470	G	T	DOID:1324 / lung cancer/HERVFB	GE	1209	MU50514085		intergenic_region
Canon	4	45613782	G	A	DOID:1612 / breast cancer/HERVH48	GE	1393	MU66902591		intergenic_region
Canon	5	3953192	C	T	DOID:4159 / skin cancer/HERVL	S	1746	MU44620856		intergenic_region
Canon	2	143251995	G	A	DOID:1612 / breast cancer/HERVH	GE	697	COSN21530684	.	.
Canon	8	84421073	G	A	DOID:10283 / prostate cancer/HERVH	GE	2876	MU29905457		intergenic_region
Canon	6	123903945	A	G	DOID:5041 / esophageal cancer/HERVH	GE	2325	MU26697627	TRDN	intron_variant
Canon	16	62680826	T	C	DOID:4159 / skin cancer/MER52	GE	4400	MU62265381		intergenic_region
Canon	8	50342224	C	T	DOID:4159 / skin cancer/HERV9	GE	2813	MU51114741		intergenic_region
Canon	11	132245527	C	A	DOID:1612 / breast cancer/HERVL	S	3676	MU65437216		intergenic_region
Canon	11	49345515	G	A	DOID:10283 / prostate cancer/HERVH	GE	3466	MU14953426	CTD-2026G22.1	intron_variant
Canon	2	78990128	G	A	DOID:4159 / skin cancer/HERVH	GE	585	MU34621141		intergenic_region
Canon	8	43411514	C	G	DOID:2394 / ovarian cancer/HERVT	GE	2781	MU5551915		intergenic_region
Canon	5	100651338	G	A	DOID:1793 / pancreatic cancer/HERVH	GE	1922	MU4903324		intergenic_region
Canon	9	77966171	G	A	DOID:4159 / skin cancer/HERVH	GE	3072	MU49017056		intergenic_region
Canon	11	38247887	G	A	DOID:4159 / skin cancer/HERVIP	GE	3442	MU46356233		intergenic_region
Canon	1	71056386	C	T	DOID:4159 / skin cancer/HERVH	GE	5919	MU46263046		intergenic_region
Canon	3	86586992	G	A	DOID:4159 / skin cancer/HERVH	GE	1007	MU52814335		intergenic_region
Canon	2	78989755	G	T	DOID:1793 / pancreatic cancer/HERVH	GE	585	MU21092256		intergenic_region
Canon	3	96387903	G	T	DOID:1793 / pancreatic cancer/HERVW	GE	1032	MU8539417		intergenic_region
Canon	4	33735230	G	A	DOID:4159 / skin cancer/HERVL	S	1362	MU57176756		intergenic_region
Canon	7	145750517	C	T	DOID:4159 / skin cancer/HERVADP	GE	2666	MU53926502		intergenic_region
Canon	3	163742446	G	T	DOID:3571 / liver cancer/HERVFB	GE	1209	MU6332938		intergenic_region
Canon	2	76804435	C	T	DOID:1612 / breast cancer/HERVH	GE	580	MU68592224		intergenic_region
Canon	8	114536049	G	A	DOID:4159 / skin cancer/MER50	GE	2934	MU49659702		intergenic_region
Canon	2	35029932	G	T	DOID:3571 / liver cancer/HERVH	GE	505	MU954177	AC012593.1	intron_variant
Canon	4	65430798	C	T	DOID:4159 / skin cancer/HML3	AB	1434	MU50511314		intergenic_region
Canon	13	56230851	A	T	DOID:4159 / skin cancer/HERVH	GE	3969	MU59120016		intergenic_region
Canon	10	54712471	G	A	DOID:4159 / skin cancer/HERVT	GE	3253	MU60996241		intergenic_region
Canon	2	41729417	G	A	DOID:4159 / skin cancer/HUERSP3	GE	521	MU54849136		intergenic_region
Canon	4	118174822	T	C	DOID:4159 / skin cancer/HERVH	GE	1577	MU67524925		intergenic_region
Canon	7	54520901	A	C	DOID:4159 / skin cancer/HML3	AB	2498	MU56592445		intergenic_region
Canon	10	37572620	G	A	DOID:4159 / skin cancer/HERV9	GE	3224	MU58431857	ATP8A2P1	intron_variant
Canon	1	241602779	G	A	DOID:4159 / skin cancer/HERVH	GE	6234	MU45796970		intergenic_region
Canon	3	26202107	C	T	DOID:4159 / skin cancer/HERVH	GE	894	MU40885376		intergenic_region
Canon	6	115557647	G	A	DOID:4159 / skin cancer/HERV9	GE	2298	MU35174529		intergenic_region
Canon	4	168344743	G	A	DOID:4159 / skin cancer/HUERSP3	GE	1690	MU61293932		intergenic_region
Canon	19	20477999	G	A	DOID:4159 / skin cancer/HERVT	GE	4639	MU50988723	AC078899.5	upstream_gene_variant
Canon	2	155724071	C	T	DOID:4159 / skin cancer/HERVH	GE	721	MU53441346		intergenic_region
Canon	4	45535667	G	A	DOID:4159 / skin cancer/HERV9	GE	1392	MU48652274		intergenic_region
Canon	2	115879187	C	T	DOID:4159 / skin cancer/MER50	GE	654	MU59960651	DPP10	intron_variant
Canon	3	168283335	T	A	DOID:1793 / pancreatic cancer/HEPSI1	GE	1227	MU12394123	EGFEM1P	intron_variant
Canon	5	114331544	C	T	DOID:4159 / skin cancer/HERV9	GE	1954	MU32899239		intergenic_region
Canon	8	61223610	G	A	DOID:4159 / skin cancer/HERVH	GE	2837	MU61967482		intergenic_region
Canon	8	73303393	G	A	DOID:1612 / breast cancer/HERV9	GE	2860	MU2086379		intergenic_region
Canon	8	54049778	C	T	DOID:3571 / liver cancer/HERV9	GE	2822	MU5205368		intergenic_region
Canon	3	167141158	C	T	DOID:4159 / skin cancer/HERVH	GE	1225	MU47314673		intergenic_region
Canon	3	176223920	T	A	DOID:4159 / skin cancer/HUERSP3	GE	1247	MU38676883		intergenic_region
Canon	18	27720995	T	C	DOID:4159 / skin cancer/MER51	GE	4529	MU56575321		intergenic_region
Canon	3	145432649	A	G	DOID:3571 / liver cancer/HERVH	GE	1152	MU1229713		intergenic_region
Canon	1	241600530	C	T	DOID:4159 / skin cancer/HERVH	GE	6234	MU47679156		intergenic_region
Canon	2	13307082	T	A	DOID:4159 / skin cancer/HERVH	GE	472	MU42064289		intergenic_region
Canon	8	91104102	G	A	DOID:4159 / skin cancer/HERVH	GE	2897	MU33333472	CALB1	intron_variant
Canon	4	135448609	C	A	DOID:1612 / breast cancer/HEPSI1	GE	1621	MU66684334		intergenic_region
Canon	6	87189868	A	T	DOID:4159 / skin cancer/HERVT	GE	2248	MU61585999		intergenic_region
Canon	6	78223221	G	A	DOID:4159 / skin cancer/HUERSP3	GE	2211	MU38332140		intergenic_region
Canon	4	167641850	G	A	DOID:3571 / liver cancer/HERVH	GE	1688	MU2781646		intergenic_region
Canon	12	17454584	A	T	DOID:4159 / skin cancer/HERVE	GE	3723	MU48328802		intergenic_region
Canon	5	129974485	G	A	DOID:1612 / breast cancer/HERV9	GE	1989	MU65414794		intergenic_region
Canon	1	79959395	C	T	DOID:4159 / skin cancer/HERVH	GE	5938	MU53706616		intergenic_region
Canon	4	134188534	A	G	DOID:4159 / skin cancer/HERVH	GE	1613	MU42417467		intergenic_region
Canon	2	115875945	A	G	DOID:5041 / esophageal cancer/MER50	GE	654	MU68714253	DPP10	intron_variant
Canon	5	103929358	T	G	DOID:1793 / pancreatic cancer/HERVFA	GE	1928	MU31614933	RP11-6N13.1	intron_variant
Canon	7	119649725	G	A	DOID:1793 / pancreatic cancer/HERVH	GE	2609	MU21570257		intergenic_region
Canon	12	118089937	G	A	DOID:4159 / skin cancer/HERVL	S	3906	MU53016243	KSR2	intron_variant
Canon	7	138026625	G	A	DOID:4159 / skin cancer/HML1	AB	2644	MU35312312		intergenic_region
Canon	9	23921327	G	T	DOID:4159 / skin cancer/HERV9	GE	3020	MU35317733		intergenic_region
Canon	6	95262996	A	C	DOID:5041 / esophageal cancer/HERVH	GE	2263	MU20007333		intergenic_region
Canon	9	118603367	G	A	DOID:1324 / lung cancer/HERVH	GE	3151	MU43889104		intergenic_region
Canon	3	103314412	C	T	DOID:4159 / skin cancer/HERVL	S	1049	MU42301733		intergenic_region
Canon	19	20686222	T	A	DOID:4159 / skin cancer/HML8	AB	4642	MU55626881	CTC-513N18.6	intron_variant
Canon	7	138026066	C	T	DOID:4159 / skin cancer/HML1	AB	2644	MU47673210		intergenic_region
Canon	7	119694280	A	T	DOID:2394 / ovarian cancer/HERV3	GE	2608	MU8985197		intergenic_region
Canon	18	27717732	C	T	DOID:1612 / breast cancer/MER51	GE	4529	MU66569899		intergenic_region
Canon	8	54052560	C	T	DOID:4159 / skin cancer/HERV9	GE	2822	MU60901467		intergenic_region
Canon	4	59160153	T	G	DOID:4159 / skin cancer/HERVH	GE	1414	MU43671213		intergenic_region
Canon	2	81881095	C	T	DOID:4159 / skin cancer/HERVIP	GE	593	MU35863508		intergenic_region
Canon	13	90308673	C	A	DOID:3571 / liver cancer/PABL	GE	4034	MU5164741		intergenic_region
Canon	2	193784549	G	A	DOID:1793 / pancreatic cancer/HERVH	GE	778	MU30155278		intergenic_region
Canon	13	82898563	C	T	DOID:3571 / liver cancer/HUERSP3	GE	4013	MU3625421		intergenic_region
Canon	7	85719542	G	T	DOID:1324 / lung cancer/HERVL	S	2548	MU55469696		intergenic_region
Canon	4	65599012	A	G	DOID:3571 / liver cancer/MER51	GE	1436	MU968970		intergenic_region
Canon	8	54397665	G	A	DOID:4159 / skin cancer/HERVS	S	2826	MU46024849		intergenic_region
Canon	2	193789073	A	C	DOID:5041 / esophageal cancer/HERVH	GE	778	MU16052627		intergenic_region
Canon	5	114332542	C	T	DOID:4159 / skin cancer/HERV9	GE	1954	MU56372786		intergenic_region
Canon	11	81741598	G	C	DOID:3571 / liver cancer/HERVH	GE	3565	MU30086483	RP11-179A16.1	intron_variant
Canon	3	487283	A	C	DOID:5041 / esophageal cancer/HERVL	S	848	MU22487778		intergenic_region
Canon	7	88176763	C	A	DOID:4159 / skin cancer/HUERSP3	GE	2552	MU32337451		intergenic_region
Canon	9	23920830	C	T	DOID:4159 / skin cancer/HERV9	GE	3020	MU45037351		intergenic_region
Canon	8	82812228	C	T	DOID:4159 / skin cancer/HERVH	GE	2872	MU52446953	RP11-354A14.1	intron_variant
Canon	8	91423803	G	A	DOID:4159 / skin cancer/HERVL	S	2898	MU36157321	LINC00534	intron_variant
Canon	11	42901791	G	A	DOID:1612 / breast cancer/HERV9	GE	3452	COSN20977077	.	.
Canon	2	115069749	C	T	DOID:4159 / skin cancer/HERVL	S	653	MU47164705		intergenic_region
Canon	14	87702262	G	A	DOID:4159 / skin cancer/HERVH	GE	4204	MU53466592		intergenic_region
Canon	3	147598447	G	A	DOID:3571 / liver cancer/HUERSP2	GE	1159	MU6244490		intergenic_region
Canon	2	229165218	C	T	DOID:4159 / skin cancer/HUERSP3	GE	833	MU44524354		intergenic_region
Canon	8	91101778	C	T	DOID:4159 / skin cancer/HERVH	GE	2897	MU54391276	CALB1	intron_variant
Canon	8	69802761	G	A	DOID:4159 / skin cancer/HML3	AB	2850	MU36146539		intergenic_region
Canon	13	82900878	C	T	DOID:4159 / skin cancer/HUERSP3	GE	4013	MU53696486		intergenic_region
Canon	3	891372	G	A	DOID:4159 / skin cancer/HERVE	GE	849	MU47476213		intergenic_region
Canon	1	79345320	G	A	DOID:4159 / skin cancer/HERVH	GE	5937	MU51288229		intergenic_region
Canon	4	35343075	A	G	DOID:5041 / esophageal cancer/HERVL	S	1370	MU34733524		intergenic_region
Canon	13	56231957	G	T	DOID:2531 / hematologic cancer/HERVH	GE	3969	MU53083088		intergenic_region
Canon	3	26316415	T	C	DOID:4159 / skin cancer/HEPSI2	GE	897	MU47359619		intergenic_region
Canon	1	188635257	C	T	DOID:4159 / skin cancer/HERVFRD	GE	6139	MU51397819		intergenic_region
Canon	18	40981877	T	C	DOID:5041 / esophageal cancer/HERVL	S	4550	MU17533101		intergenic_region
Canon	6	62315663	T	G	DOID:5041 / esophageal cancer/HERVH	GE	2164	MU281298		intergenic_region
Canon	1	118774758	A	C	DOID:5041 / esophageal cancer/HERV9	GE	6029	MU20954789		intergenic_region
Canon	7	85368129	T	G	DOID:5041 / esophageal cancer/HERVIP	GE	2547	MU17036923		intergenic_region
Canon	8	114530378	G	A	DOID:219 / colon cancer/MER50	GE	2934	MU64199664		intergenic_region
Canon	8	50336905	C	G	DOID:263 / kidney cancer/HERVH	GE	2814	MU4312909		intergenic_region
Canon	3	176224416	A	G	DOID:3571 / liver cancer/HUERSP3	GE	1247	MU1165316		intergenic_region
Canon	5	129971240	C	A	DOID:4159 / skin cancer/HERV9	GE	1989	MU55889060		intergenic_region
Canon	12	17178727	G	A	DOID:4159 / skin cancer/HERVH	GE	3722	MU55511026		intergenic_region
Canon	8	5680721	C	T	DOID:4159 / skin cancer/HERVIP	GE	2688	MU61717913		intergenic_region
Canon	3	146083254	C	T	DOID:4159 / skin cancer/HERVH	GE	1155	MU36131349		intergenic_region
Canon	8	43414992	T	A	DOID:4159 / skin cancer/HERVT	GE	2781	MU43230400		intergenic_region
Canon	2	229168686	A	C	DOID:5041 / esophageal cancer/HUERSP3	GE	833	MU377652		intergenic_region
Canon	9	23917780	C	T	DOID:4159 / skin cancer/HERV9	GE	3020	MU41077363		intergenic_region
Canon	13	64943244	T	G	DOID:5041 / esophageal cancer/HERVL	S	3984	MU14421889		intergenic_region
Canon	1	79343677	C	T	DOID:4159 / skin cancer/HERVH	GE	5937	MU49412233		intergenic_region
Canon	2	194995826	A	G	DOID:1324 / lung cancer/HERVH	GE	780	MU57884379		intergenic_region
Canon	8	65039510	T	G	DOID:5041 / esophageal cancer/HERVL	S	2845	MU284689	RP11-32K4.1	intron_variant
Canon	6	94376872	G	T	DOID:5041 / esophageal cancer/HERVL	S	2261	MU23584719		intergenic_region
Canon	14	80697079	C	T	DOID:1612 / breast cancer/HERVL	S	4189	MU64298505	DIO2	intron_variant
Canon	3	26319830	G	A	DOID:4159 / skin cancer/HEPSI2	GE	897	MU62403957		intergenic_region
Canon	4	59175136	T	G	DOID:5041 / esophageal cancer/HERV9	GE	1413	MU22752907		intergenic_region
Canon	4	131765685	C	G	DOID:4159 / skin cancer/HERV9	GE	1600	MU41163371		intergenic_region
Canon	3	34842510	C	T	DOID:4159 / skin cancer/HEPSI1	GE	916	MU56094212		intergenic_region
Canon	6	63502012	G	A	DOID:4159 / skin cancer/HERVH	GE	2167	MU43433204		intergenic_region
Canon	11	49348178	G	A	DOID:4159 / skin cancer/HERVH	GE	3466	MU33956749	CTD-2026G22.1	intron_variant
Canon	6	78215806	C	A	DOID:10283 / prostate cancer/HUERSP3	GE	2211	MU67583593		intergenic_region
Canon	11	133498025	A	C	DOID:5041 / esophageal cancer/HERVH	GE	3677	MU70828880		intergenic_region
Canon	3	166990284	T	G	DOID:5041 / esophageal cancer/HERVIP	GE	1224	MU21248588	ZBBX	intron_variant
Canon	11	127639461	G	A	DOID:4159 / skin cancer/HERVH	GE	3672	MU61012878		intergenic_region
Canon	5	121959449	G	C	DOID:1612 / breast cancer/HERVH	GE	1968	MU64403568		intergenic_region
Canon	12	21105309	G	A	DOID:4159 / skin cancer/HUERSP3	GE	3732	MU49570833	LST3	intron_variant
Canon	13	82900451	G	A	DOID:4159 / skin cancer/HUERSP3	GE	4013	MU60351148		intergenic_region
Canon	1	195704506	T	G	DOID:5041 / esophageal cancer/MER50	GE	6148	MU18515463		intergenic_region
Canon	5	45795503	G	A	DOID:4159 / skin cancer/MER52	GE	1834	MU58747542		intergenic_region
Canon	4	59175447	G	C	DOID:1793 / pancreatic cancer/HERV9	GE	1413	MU9153044		intergenic_region
Canon	2	160233	C	T	DOID:4159 / skin cancer/HERVW	GE	460	MU56917356		intergenic_region
Canon	6	78219821	G	A	DOID:4159 / skin cancer/HUERSP3	GE	2211	MU53818951		intergenic_region
Canon	14	87704105	A	G	DOID:1612 / breast cancer/HERVH	GE	4204	MU66598864		intergenic_region
Canon	7	82270928	G	A	DOID:4159 / skin cancer/HERV9	GE	2542	MU57586986		intergenic_region
Canon	1	188635658	T	C	DOID:2531 / hematologic cancer/HERVFRD	GE	6139	MU1651424		intergenic_region
Canon	2	35026780	A	T	DOID:2394 / ovarian cancer/HERVH	GE	505	COSN9371557	.	.
Canon	11	132245633	G	T	DOID:5041 / esophageal cancer/HERVL	S	3676	MU17399636		intergenic_region
Canon	5	29393203	C	T	DOID:4159 / skin cancer/HERVFB	GE	1790	MU71258088	CTD-2010I22.2	intron_variant
Canon	19	21854669	C	G	DOID:4159 / skin cancer/HML3	AB	4659	MU46008792		intergenic_region
Canon	11	39759245	C	T	DOID:4159 / skin cancer/HERVH	GE	3449	MU37058925		intergenic_region
Canon	7	85719134	G	T	DOID:1324 / lung cancer/HERVL	S	2548	MU41766775		intergenic_region
Canon	11	39758530	C	T	DOID:5041 / esophageal cancer/HERVH	GE	3449	MU71020950		intergenic_region
Canon	12	34423406	C	T	DOID:4159 / skin cancer/HERVH	GE	3760	MU55281101		intergenic_region
Canon	2	157130	C	T	DOID:4159 / skin cancer/HERVW	GE	460	MU36783888		intergenic_region
Canon	2	189772053	G	A	DOID:4159 / skin cancer/HERVL	S	775	MU60040625		intergenic_region
Canon	8	91103614	C	T	DOID:4159 / skin cancer/HERVH	GE	2897	MU45323203	CALB1	intron_variant
Canon	9	23925478	C	T	DOID:4159 / skin cancer/HERV9	GE	3020	MU58670580		intergenic_region
Canon	11	81741424	C	A	DOID:5041 / esophageal cancer/HERVH	GE	3565	MU70676641	RP11-179A16.1	intron_variant
Canon	3	94018851	T	C	DOID:1324 / lung cancer/MER65	GE	1024	MU50657699		intergenic_region
Canon	18	27003323	C	T	DOID:4159 / skin cancer/HML5	AB	4527	MU47950040		intergenic_region
Canon	3	161875304	C	T	DOID:4159 / skin cancer/HERVH	GE	1199	MU55850230		intergenic_region
Canon	11	50590177	C	T	DOID:2531 / hematologic cancer/HML8	AB	3475	MU55080982		intergenic_region
Canon	6	77197376	G	A	DOID:4159 / skin cancer/HML8	AB	2209	MU59200862		intergenic_region
Canon	19	24506367	C	T	DOID:4159 / skin cancer/HML8	AB	4687	MU49239788		intergenic_region
Canon	3	145432651	C	T	DOID:4159 / skin cancer/HERVH	GE	1152	MU41206062		intergenic_region
Canon	8	65036858	A	T	DOID:4159 / skin cancer/HERVL	S	2845	MU48362247	RP11-32K4.1	intron_variant
Canon	6	102552950	C	A	DOID:3571 / liver cancer/HERVH	GE	2275	MU3392415		intergenic_region
Canon	7	138026104	C	T	DOID:4159 / skin cancer/HML1	AB	2644	MU57714104		intergenic_region
Canon	19	55408302	G	A	DOID:4159 / skin cancer/HERVH	GE	4783	MU42012567		intergenic_region
Canon	14	87701430	C	T	DOID:4159 / skin cancer/HERVH	GE	4204	MU51205226		intergenic_region
Canon	7	138018744	C	T	DOID:4159 / skin cancer/HERVH	GE	2646	MU60873432		intergenic_region
Canon	2	155726431	A	G	DOID:4159 / skin cancer/HERVH	GE	721	MU57327921		intergenic_region
Canon	2	159092	C	T	DOID:4159 / skin cancer/HERVW	GE	460	MU56414440		intergenic_region
Canon	14	40362535	G	A	DOID:4159 / skin cancer/HERVL	S	4116	MU43488743		intergenic_region
Canon	11	132246499	A	G	DOID:10283 / prostate cancer/HERVL	S	3676	MU67669552		intergenic_region
Canon	3	26204972	G	A	DOID:4159 / skin cancer/HERVH	GE	894	MU45734027		intergenic_region
Canon	6	61946478	C	T	DOID:4159 / skin cancer/HML3	AB	2159	MU61746216		intergenic_region
Canon	2	194998603	G	A	DOID:4159 / skin cancer/HERVH	GE	780	MU43399668		intergenic_region
Canon	7	119650953	C	A	DOID:219 / colon cancer/HERVH	GE	2609	MU64240158		intergenic_region
Canon	7	54519202	G	T	DOID:5041 / esophageal cancer/HML3	AB	2498	MU18636246		intergenic_region
Canon	13	56229259	G	A	DOID:4159 / skin cancer/HERVH	GE	3969	MU42448440		intergenic_region
Canon	21	18267582	T	G	DOID:5041 / esophageal cancer/HERVH	GE	4866	MU22930051		intergenic_region
Canon	3	166546063	G	T	DOID:4159 / skin cancer/HERVH	GE	1220	MU43590872		intergenic_region
Canon	2	143251640	G	A	DOID:4159 / skin cancer/HERVH	GE	697	MU35541062		intergenic_region
Canon	8	5294052	C	T	DOID:4159 / skin cancer/HERVH	GE	2687	MU62703412		intergenic_region
Canon	13	55630875	C	T	DOID:4159 / skin cancer/HERVW	GE	3967	MU54109429		intergenic_region
Canon	2	116944598	G	A	DOID:4159 / skin cancer/HERVH	GE	655	MU45419328		intergenic_region
Canon	11	38244693	C	T	DOID:4159 / skin cancer/HERVIP	GE	3442	MU42306913		intergenic_region
Canon	6	123903729	C	T	DOID:4159 / skin cancer/HERVH	GE	2325	MU60474761	TRDN	intron_variant
Canon	7	54028602	C	T	DOID:4159 / skin cancer/HERV9	GE	2496	MU32930976		intergenic_region
Canon	5	30199223	C	T	DOID:4159 / skin cancer/HERV9	GE	1791	MU57384629		intergenic_region
Canon	8	50342242	G	A	DOID:4159 / skin cancer/HERV9	GE	2813	MU51608083		intergenic_region
Canon	13	56234679	G	A	DOID:4159 / skin cancer/HERVH	GE	3969	MU56775451		intergenic_region
Canon	8	65036485	G	A	DOID:4159 / skin cancer/HERVL	S	2845	MU29742364	RP11-32K4.1	intron_variant
Canon	2	229165242	G	T	DOID:4159 / skin cancer/HUERSP3	GE	833	MU51370343		intergenic_region
Canon	11	39762201	A	G	DOID:5041 / esophageal cancer/HERVH	GE	3449	MU70894639		intergenic_region
Canon	3	162435543	A	G	DOID:10283 / prostate cancer/HERVH	GE	1202	MU30015648		intergenic_region
Canon	1	83422843	G	T	DOID:5041 / esophageal cancer/HERVH	GE	5946	MU70551742	RP4-601K24.1	intron_variant
Canon	11	127644422	C	T	DOID:4159 / skin cancer/HERVH	GE	3672	MU62814001		intergenic_region
Canon	6	29215153	G	A	DOID:4159 / skin cancer/HERVH	GE	2107	MU50517173	XXbac-BPG308J9.3	intron_variant
Canon	2	79321133	C	G	DOID:1612 / breast cancer/HERVH48	GE	587	MU64896537		intergenic_region
Canon	11	39757440	G	A	DOID:1793 / pancreatic cancer/HERVH	GE	3449	COSN7006014	.	.
Canon	8	72582445	C	T	DOID:4159 / skin cancer/HERVH	GE	2855	MU61897219		intergenic_region
Canon	1	102557249	G	A	DOID:4159 / skin cancer/HERVIP	GE	5986	MU56413594		intergenic_region
Canon	18	49485839	C	T	DOID:4159 / skin cancer/ERV1_ARTIODACT	GE	4562	MU55239231		intergenic_region
Canon	1	188305760	G	A	DOID:4159 / skin cancer/HERVL	S	6135	MU43621736		intergenic_region
Canon	6	78305030	G	A	DOID:4159 / skin cancer/HERVL	S	2212	MU48980917		intergenic_region
Canon	11	81741469	C	T	DOID:4159 / skin cancer/HERVH	GE	3565	MU39981501	RP11-179A16.1	intron_variant
Canon	12	61349661	T	G	DOID:5041 / esophageal cancer/HERVH	GE	3816	MU22929528		intergenic_region
Canon	4	135455159	T	C	DOID:3571 / liver cancer/HEPSI1	GE	1621	MU1237473		intergenic_region
Canon	11	133499499	T	C	DOID:219 / colon cancer/HERVH	GE	3677	MU64155970		intergenic_region
Canon	4	131765923	C	T	DOID:4159 / skin cancer/HERV9	GE	1600	MU62993643		intergenic_region
Canon	5	114327008	G	A	DOID:4159 / skin cancer/HERV9	GE	1954	MU53685334		intergenic_region
Canon	4	179128799	C	A	DOID:1324 / lung cancer/HERVH	GE	1721	MU55267067		intergenic_region
Canon	4	70062902	C	T	DOID:4159 / skin cancer/HML8	AB	1450	MU58526520	UGT2B11	downstream_gene_variant
Canon	1	71059137	G	A	DOID:1793 / pancreatic cancer/HERVH	GE	5919	MU5767367		intergenic_region
Canon	14	87706917	G	A	DOID:4159 / skin cancer/HERVH	GE	4204	MU37321398		intergenic_region
Canon	19	22752254	C	T	DOID:4159 / skin cancer/HERVH	GE	4670	MU58768755		intergenic_region
Canon	7	145752022	C	T	DOID:4159 / skin cancer/HERVADP	GE	2666	MU45125388		intergenic_region
Canon	6	95267159	G	A	DOID:1793 / pancreatic cancer/HERVH	GE	2263	MU31200339		intergenic_region
Canon	5	135903088	G	T	DOID:1793 / pancreatic cancer/HERVH	GE	2000	MU5124363		intergenic_region
Canon	1	241601831	C	T	DOID:4159 / skin cancer/HERVH	GE	6234	MU41599654		intergenic_region
Canon	6	94375810	G	A	DOID:4159 / skin cancer/HERVL	S	2261	MU48819944		intergenic_region
Canon	5	40103688	G	T	DOID:263 / kidney cancer/HML8	AB	1818	MU21883451		intergenic_region
Canon	3	82700482	G	A	DOID:4159 / skin cancer/MER52	GE	999	MU62630378		intergenic_region
Canon	4	65428929	C	T	DOID:4159 / skin cancer/HML3	AB	1434	MU55559176		intergenic_region
Canon	4	63287554	T	C	DOID:5041 / esophageal cancer/HERVL	S	1422	MU14981743		intergenic_region
Canon	5	165557743	A	G	DOID:1793 / pancreatic cancer/HERVFB	GE	2042	MU5270108	RP11-67M9.1	intron_variant
Canon	1	181219176	G	A	DOID:4159 / skin cancer/HML8	AB	6122	MU48861863		intergenic_region
Canon	2	200045259	G	A	DOID:4159 / skin cancer/HERVH	GE	788	MU62159771		intergenic_region
Canon	10	37571053	G	T	DOID:1793 / pancreatic cancer/HERV9	GE	3224	MU6334333	ATP8A2P1	intron_variant
Canon	12	82291035	C	T	DOID:1612 / breast cancer/HERV9	GE	3853	MU65777854		intergenic_region
Canon	10	59598313	T	A	DOID:1324 / lung cancer/HERV9	GE	3269	MU53586741		intergenic_region
Canon	21	17357443	G	A	DOID:4159 / skin cancer/HERVH	GE	4864	MU59090673		intergenic_region
Canon	6	63299357	C	T	DOID:4159 / skin cancer/HERVH	GE	2166	MU60031103		intergenic_region
Canon	7	54520144	C	T	DOID:4159 / skin cancer/HML3	AB	2498	MU54645332		intergenic_region
Canon	1	5108804	G	T	DOID:1324 / lung cancer/HERVH	GE	5811	MU56890082		intergenic_region
Canon	2	82258182	C	T	DOID:4159 / skin cancer/HML9	AB	594	MU41300956		intergenic_region
Canon	6	78222773	G	A	DOID:4159 / skin cancer/HUERSP3	GE	2211	MU43598455		intergenic_region
Canon	1	80163195	T	C	DOID:4159 / skin cancer/HERVH	GE	5940	MU35435629		intergenic_region
Canon	11	81517925	C	T	DOID:4159 / skin cancer/HERVH	GE	3562	MU60298560		intergenic_region
Canon	1	195706430	T	G	DOID:1612 / breast cancer/MER50	GE	6148	MU2009201		intergenic_region
Canon	13	55630604	A	T	DOID:4159 / skin cancer/HERVW	GE	3967	MU57943828		intergenic_region
Canon	11	50590544	C	T	DOID:4159 / skin cancer/HML8	AB	3475	MU49183536		intergenic_region
Canon	3	95312722	G	A	DOID:1793 / pancreatic cancer/HERV9	GE	1027	MU69741136		intergenic_region
Canon	7	136260040	G	A	DOID:1793 / pancreatic cancer/HERVL	S	2641	MU30834143		intergenic_region
Canon	1	247871538	C	G	DOID:10283 / prostate cancer/HERVL	S	6254	MU58772924	OR6F1	downstream_gene_variant
Canon	19	20477850	G	A	DOID:4159 / skin cancer/HERVT	GE	4639	MU48706848	AC078899.5	upstream_gene_variant
Canon	8	114533024	G	C	DOID:5041 / esophageal cancer/MER50	GE	2934	MU328193		intergenic_region
Canon	13	56689957	G	A	DOID:4159 / skin cancer/HERVH	GE	3972	MU52195538		intergenic_region
Canon	8	64835264	G	A	DOID:4159 / skin cancer/HERVL	S	2844	MU63074246	RP11-32K4.1	intron_variant
Canon	6	121249112	C	T	DOID:4159 / skin cancer/HERVH	GE	2314	MU44245388		intergenic_region
Canon	3	167145959	T	A	DOID:2394 / ovarian cancer/HERVH	GE	1225	MU6578026		intergenic_region
Canon	6	78305978	G	A	DOID:4159 / skin cancer/HERVL	S	2212	MU42145938		intergenic_region
Canon	11	38245572	C	G	DOID:2531 / hematologic cancer/HERVIP	GE	3442	MU69114227		intergenic_region
Canon	9	121253455	T	C	DOID:4159 / skin cancer/HERVH	GE	3155	MU45688752		intergenic_region
Canon	4	63920428	C	T	DOID:3571 / liver cancer/HERV9	GE	1425	MU44080974		intergenic_region
Canon	12	34678800	A	T	DOID:1612 / breast cancer/HML8	AB	3761	MU66350385		intergenic_region
Canon	2	179916821	A	G	DOID:1793 / pancreatic cancer/HERVH	GE	753	MU12161888		intergenic_region
Canon	8	43414128	G	A	DOID:10283 / prostate cancer/HERVT	GE	2781	MU28539246		intergenic_region
Canon	3	26206666	G	A	DOID:4159 / skin cancer/HERVH	GE	894	MU47742635		intergenic_region
Canon	8	82810286	G	A	DOID:4159 / skin cancer/HERVH	GE	2872	MU46925605	RP11-354A14.1	intron_variant
Canon	10	54712369	G	A	DOID:4159 / skin cancer/HERVT	GE	3253	MU42714690		intergenic_region
Canon	3	161872517	G	A	DOID:4159 / skin cancer/HERVH	GE	1199	MU55304761		intergenic_region
Canon	16	35145346	G	T	DOID:1793 / pancreatic cancer/HERVH	GE	4379	MU30302950		intergenic_region
Canon	8	54052118	A	G	DOID:4159 / skin cancer/HERV9	GE	2822	MU47973881		intergenic_region
Canon	2	76099967	C	G	DOID:4159 / skin cancer/HERVW	GE	577	MU55066664		intergenic_region
Canon	13	82903227	A	T	DOID:1324 / lung cancer/HUERSP3	GE	4013	MU48017011		intergenic_region
Canon	8	61222539	G	A	DOID:4159 / skin cancer/HERVH	GE	2837	MU61855191		intergenic_region
Canon	6	94376691	C	T	DOID:4159 / skin cancer/HERVL	S	2261	MU54188142		intergenic_region
Canon	5	135902980	G	A	DOID:4159 / skin cancer/HERVH	GE	2000	MU59778820		intergenic_region
Canon	3	26206947	G	A	DOID:4159 / skin cancer/HERVH	GE	894	MU59931016		intergenic_region
Canon	8	43409485	G	A	DOID:4159 / skin cancer/HERVT	GE	2781	MU58541246		intergenic_region
Canon	4	45537032	C	T	DOID:4159 / skin cancer/HERV9	GE	1392	MU59318112		intergenic_region
Canon	19	22752815	G	T	DOID:1324 / lung cancer/HERVH	GE	4670	MU63154286		intergenic_region
Canon	6	94372447	G	A	DOID:4159 / skin cancer/HERVL	S	2261	MU61547174		intergenic_region
Canon	4	179130643	C	T	DOID:4159 / skin cancer/HERVH	GE	1721	MU49474259		intergenic_region
Canon	12	127973794	C	T	DOID:4159 / skin cancer/HERVE	GE	3915	MU58273502		intergenic_region
Canon	14	41706725	G	A	DOID:4159 / skin cancer/HERVL	S	4118	MU33768962		intergenic_region
Canon	16	62681319	C	T	DOID:4159 / skin cancer/MER52	GE	4400	MU56260938		intergenic_region
Canon	11	133502019	C	T	DOID:4159 / skin cancer/HERVH	GE	3677	MU57872611		intergenic_region
Canon	7	85367507	G	A	DOID:4159 / skin cancer/HERVIP	GE	2547	MU39843616		intergenic_region
Canon	12	127097585	A	G	DOID:1612 / breast cancer/HERVIP	GE	3913	MU63646363	RP11-407A16.8	downstream_gene_variant
Canon	11	29543344	G	A	DOID:4159 / skin cancer/HERV3	GE	3431	MU61943439	RP11-460B17.3	intron_variant
Canon	16	65310959	G	A	DOID:4159 / skin cancer/HERVH	GE	4405	MU49624424	RP11-256I9.3	intron_variant
Canon	7	145753340	C	T	DOID:4159 / skin cancer/HERVADP	GE	2666	MU42414108		intergenic_region
Canon	18	57405494	G	A	DOID:4159 / skin cancer/ERV1_ARTIODACT	GE	4572	MU61487676		intergenic_region
Canon	2	13307551	G	A	DOID:4159 / skin cancer/HERVH	GE	472	MU38285497		intergenic_region
Canon	1	181216477	C	T	DOID:4159 / skin cancer/HML8	AB	6122	MU41748966		intergenic_region
Canon	21	18267235	C	T	DOID:4159 / skin cancer/HERVH	GE	4866	MU47186281		intergenic_region
Canon	15	24931834	G	A	DOID:4159 / skin cancer/HERVH	GE	4245	MU44578903		intergenic_region
Canon	6	98616709	C	T	DOID:4159 / skin cancer/HERVL	S	2267	MU50541846	RP11-436D23.1	intron_variant
Canon	4	131931863	C	T	DOID:4159 / skin cancer/MER51	GE	1603	MU48999509		intergenic_region
Canon	4	59326751	C	T	DOID:4159 / skin cancer/HERV9	GE	1417	MU58803438		intergenic_region
Canon	4	137537238	C	T	DOID:4159 / skin cancer/HERVH	GE	1629	MU59009400		intergenic_region
Canon	7	93273076	C	T	DOID:4159 / skin cancer/HERVH	GE	2565	MU50575724	GNGT1	intron_variant
Canon	7	85371057	C	T	DOID:4159 / skin cancer/HERVIP	GE	2547	MU56011164		intergenic_region
Canon	14	87202337	C	T	DOID:4159 / skin cancer/HERVH	GE	4201	MU40077607		intergenic_region
Canon	7	136259468	G	A	DOID:4159 / skin cancer/HERVL	S	2641	MU51893755		intergenic_region
Canon	1	188310609	G	C	DOID:10283 / prostate cancer/HERVL	S	6135	MU29544128		intergenic_region
Canon	7	88171667	A	G	DOID:4159 / skin cancer/HUERSP3	GE	2552	MU3110002		intergenic_region
Canon	3	97965498	C	T	DOID:4159 / skin cancer/HERVH	GE	1036	MU63100138	RP11-325B23.2	intron_variant
Canon	3	102456823	C	T	DOID:4159 / skin cancer/HERVS	S	1046	MU52022282		intergenic_region
Canon	11	38244173	T	G	DOID:2531 / hematologic cancer/HERVIP	GE	3442	MU68138889		intergenic_region
Canon	3	34846831	G	A	DOID:4159 / skin cancer/HEPSI1	GE	916	MU60828416		intergenic_region
Canon	11	123737242	G	A	DOID:4159 / skin cancer/HERVH	GE	3663	MU46598516		intergenic_region
Canon	4	63288453	T	A	DOID:1793 / pancreatic cancer/HERVL	S	1422	MU9169848		intergenic_region
Canon	6	78306099	T	G	DOID:5041 / esophageal cancer/HERVL	S	2212	MU34713601		intergenic_region
Canon	4	136091670	G	C	DOID:3571 / liver cancer/HERVH	GE	1624	MU3547842		intergenic_region
Canon	7	88177085	G	A	DOID:4159 / skin cancer/HUERSP3	GE	2552	MU57647056		intergenic_region
Canon	1	248500805	G	A	DOID:4159 / skin cancer/HERVH	GE	6259	MU45278901		intergenic_region
Canon	14	87200035	C	T	DOID:4159 / skin cancer/HERVH	GE	4201	MU60964158		intergenic_region
Canon	12	21109285	G	C	DOID:1793 / pancreatic cancer/HUERSP3	GE	3732	MU7650361	LST3	intron_variant
Canon	2	193783922	C	T	DOID:4159 / skin cancer/HERVH	GE	778	MU48158202		intergenic_region
Canon	13	63790065	A	T	DOID:263 / kidney cancer/HERVH	GE	3979	MU4036537	LINC00376	intron_variant
Canon	9	77970274	G	A	DOID:4159 / skin cancer/HERVH	GE	3072	MU50017712		intergenic_region
Canon	7	85374068	G	A	DOID:4159 / skin cancer/HERVIP	GE	2547	MU39843620		intergenic_region
Canon	7	119651526	A	T	DOID:1793 / pancreatic cancer/HERVH	GE	2609	MU69323968		intergenic_region
Canon	8	54054105	T	C	DOID:5041 / esophageal cancer/HERV9	GE	2822	MU17412243		intergenic_region
Canon	2	41721040	G	T	DOID:5041 / esophageal cancer/HUERSP3	GE	521	MU69311604		intergenic_region
Canon	4	139545107	C	T	DOID:4159 / skin cancer/HERVW	GE	1636	MU60622863		intergenic_region
Canon	8	50342422	C	T	DOID:4159 / skin cancer/HERV9	GE	2813	MU62143766		intergenic_region
Canon	3	97963946	C	T	DOID:2394 / ovarian cancer/HERVH	GE	1036	MU7134255	RP11-325B23.2	intron_variant
Canon	13	90314847	C	T	DOID:5041 / esophageal cancer/PABL	GE	4034	MU68902855		intergenic_region
Canon	19	55409640	G	A	DOID:4159 / skin cancer/HERVH	GE	4783	MU56973598		intergenic_region
Canon	7	136261974	A	T	DOID:3571 / liver cancer/HERVL	S	2641	MU30430091		intergenic_region
Canon	8	47500796	C	T	DOID:4159 / skin cancer/HML8	AB	2797	MU58659927	ASNSP1	intron_variant
Canon	12	84499915	A	G	DOID:1793 / pancreatic cancer/HML8	AB	3857	MU30398007		intergenic_region
Canon	19	22757207	G	A	DOID:1793 / pancreatic cancer/HERVH	GE	4670	MU64710562		intergenic_region
Canon	2	141188377	C	T	DOID:4159 / skin cancer/HERVH	GE	695	MU57897009	LRP1B	intron_variant
Canon	7	124904610	T	G	DOID:5041 / esophageal cancer/HERVH	GE	2623	MU35905975	RP11-3B12.3	upstream_gene_variant
Canon	18	62349826	G	A	DOID:5041 / esophageal cancer/HERVH	GE	4579	MU70298290		intergenic_region
Canon	9	77969810	G	A	DOID:4159 / skin cancer/HERVH	GE	3072	MU59645233		intergenic_region
Canon	10	37566390	C	T	DOID:1793 / pancreatic cancer/HERV9	GE	3224	MU6334242	ATP8A2P1	intron_variant
Canon	10	59597640	G	A	DOID:4159 / skin cancer/HERV9	GE	3269	MU43481352		intergenic_region
Canon	7	88175375	G	A	DOID:4159 / skin cancer/HUERSP3	GE	2552	MU41178454		intergenic_region
Canon	4	63924939	A	G	DOID:5041 / esophageal cancer/HERV9	GE	1425	MU34082606		intergenic_region
Canon	8	82815814	C	T	DOID:4159 / skin cancer/HERVH	GE	2872	MU62672743	RP11-354A14.1	intron_variant
Canon	1	188634844	G	A	DOID:4159 / skin cancer/HERVFRD	GE	6139	MU48713174		intergenic_region
Canon	3	21232629	C	T	DOID:5041 / esophageal cancer/HERVH	GE	890	MU33574812		intergenic_region
Canon	5	28048070	C	T	DOID:4159 / skin cancer/HERVH	GE	1788	MU59473104		intergenic_region
Canon	8	68620267	G	A	DOID:4159 / skin cancer/MER50	GE	2849	MU49337212	CPA6	intron_variant
Canon	3	162433716	G	A	DOID:4159 / skin cancer/HERVH	GE	1202	MU59736499		intergenic_region
Canon	3	161694313	T	C	DOID:2394 / ovarian cancer/HUERSP2	GE	1197	MU6528696		intergenic_region
Canon	2	76801446	G	T	DOID:4159 / skin cancer/HERVH	GE	580	MU56230595		intergenic_region
Canon	12	78877132	A	C	DOID:5041 / esophageal cancer/HERVIP	GE	3846	MU323773	RP11-171L9.1	intron_variant
Canon	21	17354240	C	T	DOID:4159 / skin cancer/HERVH	GE	4864	MU56046179		intergenic_region
Canon	5	165562782	G	A	DOID:4159 / skin cancer/HERVFB	GE	2042	MU51004890	RP11-67M9.1	intron_variant
Canon	8	50340662	C	T	DOID:4159 / skin cancer/HERV9	GE	2813	MU37699867		intergenic_region
Canon	10	37568235	C	T	DOID:4159 / skin cancer/HERV9	GE	3224	MU58487423	ATP8A2P1	intron_variant
Canon	12	118089605	G	A	DOID:4159 / skin cancer/HERVL	S	3906	MU50617825	KSR2	intron_variant
Canon	11	81741100	C	T	DOID:4159 / skin cancer/HERVH	GE	3565	MU46790521	RP11-179A16.1	intron_variant
Canon	15	24933354	T	A	DOID:1324 / lung cancer/HERVH	GE	4245	MU43068192		intergenic_region
Canon	1	118769847	C	T	DOID:4159 / skin cancer/HERV9	GE	6029	MU58411576		intergenic_region
Canon	2	82257141	G	T	DOID:2531 / hematologic cancer/HML9	AB	594	MU54887763		intergenic_region
Canon	3	167145990	C	A	DOID:1612 / breast cancer/HERVH	GE	1225	MU64943824		intergenic_region
Canon	3	163737752	A	C	DOID:5041 / esophageal cancer/HERVFB	GE	1209	MU35769827		intergenic_region
Canon	13	87416524	C	T	DOID:4159 / skin cancer/HERVFB	GE	4023	MU59463422		intergenic_region
Canon	1	247871027	T	G	DOID:5041 / esophageal cancer/HERVL	S	6254	MU33911874	OR6F1	downstream_gene_variant
Canon	12	34420675	G	A	DOID:4159 / skin cancer/HERVH	GE	3760	MU39328598		intergenic_region
Canon	13	87840082	C	T	DOID:4159 / skin cancer/HERVH	GE	4024	MU47376870		intergenic_region
Canon	3	86590721	T	A	DOID:3571 / liver cancer/HERVH	GE	1007	MU3299362		intergenic_region
Canon	9	121251624	T	C	DOID:1612 / breast cancer/HERVH	GE	3155	MU66864090		intergenic_region
Canon	4	65592706	C	A	DOID:3571 / liver cancer/MER51	GE	1436	MU2990075		intergenic_region
Canon	4	131765779	C	A	DOID:1324 / lung cancer/HERV9	GE	1600	MU46468281		intergenic_region
Canon	11	101106349	C	T	DOID:4159 / skin cancer/HERV9	GE	3622	MU39439197		intergenic_region
Canon	6	78218370	G	A	DOID:4159 / skin cancer/HUERSP3	GE	2211	MU52677645		intergenic_region
Canon	6	130515192	T	A	DOID:5041 / esophageal cancer/HERVH	GE	2334	MU26698805	SAMD3	intron_variant
Canon	3	86588156	A	T	DOID:3571 / liver cancer/HERVH	GE	1007	MU6838695		intergenic_region
Canon	6	78304838	C	T	DOID:4159 / skin cancer/HERVL	S	2212	MU57660632		intergenic_region
Canon	3	26317032	A	G	DOID:5041 / esophageal cancer/HEPSI2	GE	897	MU18515036		intergenic_region
Canon	8	47498956	T	C	DOID:5041 / esophageal cancer/HML8	AB	2797	MU68270068	ASNSP1	intron_variant
Canon	2	194999855	C	T	DOID:4159 / skin cancer/HERVH	GE	780	MU54216986		intergenic_region
Canon	8	82814290	C	A	DOID:1612 / breast cancer/HERVH	GE	2872	MU64297567	RP11-354A14.1	intron_variant
Canon	5	49671434	G	A	DOID:4159 / skin cancer/HERV9	GE	1841	MU50752639		intergenic_region
Canon	3	147595889	C	T	DOID:4159 / skin cancer/HUERSP2	GE	1159	MU56337875		intergenic_region
Canon	14	27588122	G	A	DOID:4159 / skin cancer/HERVL	S	4091	MU51344061	RP11-384J4.2	intron_variant
Canon	3	163627450	C	A	DOID:219 / colon cancer/HERVH	GE	1208	MU45298191		intergenic_region
Canon	4	64865017	G	A	DOID:4159 / skin cancer/HEPSI3	GE	1428	MU45213702		intergenic_region
Canon	4	63919928	C	G	DOID:1612 / breast cancer/HERV9	GE	1425	MU68521899		intergenic_region
Canon	3	166990556	C	T	DOID:4159 / skin cancer/HERVIP	GE	1224	MU48657782	ZBBX	intron_variant
Canon	6	120088599	G	A	DOID:4159 / skin cancer/HERVIP	GE	2312	MU60321528		intergenic_region
Canon	14	106655839	G	A	DOID:4159 / skin cancer/HERVT	GE	4229	MU62523327		intergenic_region
Canon	1	118770249	C	T	DOID:4159 / skin cancer/HERV9	GE	6029	MU62063565		intergenic_region
Canon	5	113109623	G	A	DOID:4159 / skin cancer/HERV4	GE	1950	MU52464713		intergenic_region
Canon	5	46006139	G	A	DOID:4159 / skin cancer/HML2	AB	1836	MU32850531		intergenic_region
Canon	1	82820775	G	A	DOID:4159 / skin cancer/HERVH	GE	5945	MU42205827		intergenic_region
Canon	15	95299719	C	T	DOID:4159 / skin cancer/HERVH	GE	4319	MU50099746		intergenic_region
Canon	8	35809944	T	C	DOID:5041 / esophageal cancer/HERVE	GE	2763	MU421085	RP11-473J6.1	intron_variant
Canon	1	79341399	T	G	DOID:5041 / esophageal cancer/HERVH	GE	5937	MU33830142		intergenic_region
Canon	14	41705407	A	C	DOID:5041 / esophageal cancer/HERVL	S	4118	MU24857380		intergenic_region
Canon	2	193785046	C	T	DOID:4159 / skin cancer/HERVH	GE	778	MU60910800		intergenic_region
Canon	4	65429838	T	G	DOID:1793 / pancreatic cancer/HML3	AB	1434	MU64665564		intergenic_region
Canon	13	87843716	G	C	DOID:4159 / skin cancer/HERVH	GE	4024	MU51131982		intergenic_region
Canon	11	127642341	C	T	DOID:4159 / skin cancer/HERVH	GE	3672	MU42465532		intergenic_region
Canon	3	95311684	G	A	DOID:4159 / skin cancer/HERV9	GE	1027	MU42491161		intergenic_region
Canon	5	103399589	G	A	DOID:4159 / skin cancer/HERVH	GE	1925	MU71213428		intergenic_region
Canon	3	67092435	G	A	DOID:4159 / skin cancer/HERVH	GE	971	MU40656572		intergenic_region
Canon	4	92620276	G	C	DOID:1793 / pancreatic cancer/HML3	AB	1507	MU4852533		intergenic_region
Canon	12	61350602	G	A	DOID:4159 / skin cancer/HERVH	GE	3816	MU54449569		intergenic_region
Canon	2	41728153	G	C	DOID:4159 / skin cancer/HUERSP3	GE	521	MU40407440		intergenic_region
Canon	7	120418975	G	A	DOID:4159 / skin cancer/HERVH	GE	2611	MU41609880		intergenic_region
Canon	2	141184290	C	T	DOID:4159 / skin cancer/HERVH	GE	695	MU35673427	LRP1B	intron_variant
Canon	4	92621703	G	A	DOID:3571 / liver cancer/HML3	AB	1507	MU2581910		intergenic_region
Canon	3	26202664	T	G	DOID:1612 / breast cancer/HERVH	GE	894	MU61982672		intergenic_region
Canon	6	95264323	G	C	DOID:1324 / lung cancer/HERVH	GE	2263	MU48615128		intergenic_region
Canon	2	116942861	G	A	DOID:4159 / skin cancer/HERVH	GE	655	MU39586343		intergenic_region
Canon	4	93360397	C	G	DOID:1324 / lung cancer/HERVH	GE	1514	MU63242946	GRID2	intron_variant
Canon	1	5107595	A	G	DOID:4159 / skin cancer/HERVH	GE	5811	MU61320776		intergenic_region
Canon	5	30202908	G	T	DOID:4159 / skin cancer/HERV9	GE	1791	MU56877961		intergenic_region
Canon	8	50347079	G	T	DOID:4159 / skin cancer/HERV9	GE	2813	MU42897544		intergenic_region
Canon	3	86590414	G	T	DOID:1793 / pancreatic cancer/HERVH	GE	1007	MU31967870		intergenic_region
Canon	3	172875506	T	C	DOID:263 / kidney cancer/HERVH	GE	1237	MU4127576	RP11-324C10.1	intron_variant
Canon	14	27591373	C	T	DOID:2394 / ovarian cancer/HERVL	S	4091	MU7791004	RP11-384J4.2	intron_variant
Canon	3	166987106	G	T	DOID:2531 / hematologic cancer/HERVIP	GE	1224	MU69463943	ZBBX	intron_variant
Canon	1	71054325	C	T	DOID:4159 / skin cancer/HERVH	GE	5919	MU59083121		intergenic_region
Canon	3	87658874	G	C	DOID:1612 / breast cancer/HERVIP	GE	1011	MU65645492		intergenic_region
Canon	4	12366467	T	C	DOID:1793 / pancreatic cancer/HERVH	GE	1324	MU8654772		intergenic_region
Canon	7	54028306	C	T	DOID:4159 / skin cancer/HERV9	GE	2496	MU53738728		intergenic_region
Canon	21	18288673	G	A	DOID:4159 / skin cancer/HERVH	GE	4867	MU50162344		intergenic_region
Canon	11	29543359	A	G	DOID:1324 / lung cancer/HERV3	GE	3431	MU53661628	RP11-460B17.3	intron_variant
Canon	6	62043245	T	G	DOID:4159 / skin cancer/MER52	GE	2161	MU59400120		intergenic_region
Canon	14	40368739	C	A	DOID:8618 / oral cavity cancer/HERVL	S	4116	MU68221519		intergenic_region
Canon	2	116941523	G	T	DOID:1324 / lung cancer/HERVH	GE	655	MU57873279		intergenic_region
Canon	16	35137535	T	A	DOID:4159 / skin cancer/HERVH	GE	4379	MU54732643		intergenic_region
Canon	14	87202318	G	T	DOID:3571 / liver cancer/HERVH	GE	4201	MU3315992		intergenic_region
Canon	2	79324725	G	A	DOID:4159 / skin cancer/HERVH48	GE	587	MU39084898		intergenic_region
Canon	7	138028846	C	T	DOID:4159 / skin cancer/HML1	AB	2644	MU57583084		intergenic_region
Canon	11	80748100	C	T	DOID:4159 / skin cancer/HML5	AB	3557	MU49281257		intergenic_region
Canon	7	82271526	G	A	DOID:4159 / skin cancer/HERV9	GE	2542	MU58755596		intergenic_region
Canon	4	134876748	G	A	DOID:1793 / pancreatic cancer/HERVADP	GE	1617	MU12491958	RP11-427M20.1	intron_variant
Canon	6	61951333	G	A	DOID:4159 / skin cancer/HML3	AB	2159	MU60284406		intergenic_region
Canon	3	102460196	C	T	DOID:4159 / skin cancer/HERVS	S	1046	MU59659994		intergenic_region
Canon	10	54711459	G	A	DOID:4159 / skin cancer/HERVT	GE	3253	MU39951365		intergenic_region
Canon	9	121248462	G	T	DOID:1612 / breast cancer/HERVH	GE	3155	MU66356954		intergenic_region
Canon	7	54023926	G	A	DOID:4159 / skin cancer/HERV9	GE	2496	MU41796063		intergenic_region
Canon	4	118174688	C	T	DOID:4159 / skin cancer/HERVH	GE	1577	MU41921709		intergenic_region
Canon	2	82256195	G	A	DOID:1793 / pancreatic cancer/HML9	AB	594	MU69562107		intergenic_region
Canon	6	78217659	T	C	DOID:2394 / ovarian cancer/HUERSP3	GE	2211	MU8820198		intergenic_region
Canon	2	229171829	G	T	DOID:1612 / breast cancer/HUERSP3	GE	833	MU66821885		intergenic_region
Canon	8	84420201	G	A	DOID:4159 / skin cancer/HERVH	GE	2876	MU45659302		intergenic_region
Canon	4	163635779	A	C	DOID:4159 / skin cancer/HERVH	GE	1676	MU35902123		intergenic_region
Canon	9	77970872	G	T	DOID:4159 / skin cancer/HERVH	GE	3072	MU46123632		intergenic_region
Canon	11	50590847	G	T	DOID:5041 / esophageal cancer/HML8	AB	3475	MU330826		intergenic_region
Canon	5	18542736	G	A	DOID:4159 / skin cancer/HERVH	GE	1766	MU60789427		intergenic_region
Canon	8	39741089	C	T	DOID:2531 / hematologic cancer/HERV9	GE	2772	MU69872636		intergenic_region
Canon	5	28047821	G	A	DOID:4159 / skin cancer/HERVH	GE	1788	MU56522975		intergenic_region
Canon	12	82293502	G	T	DOID:1324 / lung cancer/HERV9	GE	3853	MU47003359		intergenic_region
Canon	12	114496236	T	A	DOID:3571 / liver cancer/HERVH	GE	3903	MU7070015		intergenic_region
Canon	7	91079873	G	A	DOID:1793 / pancreatic cancer/HERV9	GE	2554	MU31286671	RP11-115N4.1	intron_variant
Canon	3	35921412	G	A	DOID:4159 / skin cancer/HERVH	GE	917	MU41040344		intergenic_region
Canon	7	91082997	C	T	DOID:4159 / skin cancer/HERV9	GE	2554	MU55384341	RP11-115N4.1	intron_variant
Canon	9	121251893	G	C	DOID:219 / colon cancer/HERVH	GE	3155	MU64003283		intergenic_region
Canon	6	78214568	C	T	DOID:4159 / skin cancer/HUERSP3	GE	2211	MU50103440		intergenic_region
Canon	4	163634278	G	T	DOID:263 / kidney cancer/HERVH	GE	1676	MU3908168		intergenic_region
Canon	4	128196874	G	A	DOID:4159 / skin cancer/HML3	AB	1593	MU42369727	RP11-125O18.1	intron_variant
Canon	6	58742300	C	T	DOID:4159 / skin cancer/HML3	AB	2156	MU43959647		intergenic_region
Canon	2	79319188	G	T	DOID:2531 / hematologic cancer/HERVH48	GE	587	MU1565526		intergenic_region
Canon	3	167150735	C	T	DOID:4159 / skin cancer/HERVH	GE	1226	MU56997853		intergenic_region
Canon	18	54086820	C	T	DOID:4159 / skin cancer/HERVH	GE	4566	MU54536131		intergenic_region
Canon	11	91335829	G	A	DOID:4159 / skin cancer/HERVL	S	3592	MU33970542		intergenic_region
Canon	7	85371256	A	G	DOID:5041 / esophageal cancer/HERVIP	GE	2547	MU25363330		intergenic_region
Canon	1	5112935	G	T	DOID:5041 / esophageal cancer/HERVH	GE	5811	MU35524277		intergenic_region
Canon	7	82268195	G	A	DOID:1793 / pancreatic cancer/HERV9	GE	2542	MU7662892		intergenic_region
Canon	11	50595378	T	A	DOID:4159 / skin cancer/HML8	AB	3475	MU45537827		intergenic_region
Canon	5	135905546	C	T	DOID:219 / colon cancer/HERVH	GE	2000	MU64122803		intergenic_region
Canon	2	195000412	G	A	DOID:4159 / skin cancer/HERVH	GE	780	MU42199697		intergenic_region
Canon	12	34676741	C	A	DOID:1324 / lung cancer/HML8	AB	3761	MU52110883		intergenic_region
Canon	6	62042997	C	T	DOID:4159 / skin cancer/MER52	GE	2161	MU53205501		intergenic_region
Canon	14	80691826	G	A	DOID:4159 / skin cancer/HERVL	S	4189	MU42618527	DIO2	intron_variant
Canon	6	63792310	C	T	DOID:4159 / skin cancer/HERV9	GE	2169	MU28955171		intergenic_region
Canon	1	166575638	C	T	DOID:4159 / skin cancer/HML2	AB	6089	MU56624328	FMO9P	intron_variant
Canon	5	29392898	C	T	DOID:4159 / skin cancer/HERVFB	GE	1790	MU71212241	CTD-2010I22.2	intron_variant
Canon	4	44997399	C	T	DOID:4159 / skin cancer/HERVFRD	GE	1388	MU51173278		intergenic_region
Canon	3	172875833	G	A	DOID:4159 / skin cancer/HERVH	GE	1237	MU57206908	RP11-324C10.1	intron_variant
Canon	6	72458258	C	T	DOID:1793 / pancreatic cancer/HERVH	GE	2199	MU30924136		intergenic_region
Canon	6	57620885	C	T	DOID:4159 / skin cancer/HML2	AB	2153	MU57301351		intergenic_region
Canon	7	91078628	G	A	DOID:4159 / skin cancer/HERV9	GE	2554	MU59288966	RP11-115N4.1	intron_variant
Canon	10	96530257	C	T	DOID:4159 / skin cancer/HERV9	GE	3326	MU61072103	CYP2C19	intron_variant
Canon	5	103932571	G	A	DOID:4159 / skin cancer/HERVFA	GE	1928	MU59787213	RP11-6N13.1	intron_variant
Canon	18	41093511	G	T	DOID:5041 / esophageal cancer/HERVIP	GE	4551	MU28183079		intergenic_region
Canon	1	102068813	G	A	DOID:4159 / skin cancer/HERVH	GE	5985	MU53613136		intergenic_region
Canon	4	44997616	G	A	DOID:4159 / skin cancer/HERVFRD	GE	1388	MU61614999		intergenic_region
Canon	7	124903662	T	A	DOID:5041 / esophageal cancer/HERVH	GE	2623	MU70351676	RP11-3B12.3	intron_variant
Canon	2	78061526	G	T	DOID:5041 / esophageal cancer/MER50	GE	583	MU69589496		intergenic_region
Canon	4	59159763	T	G	DOID:5041 / esophageal cancer/HERVH	GE	1414	MU69833650		intergenic_region
Canon	1	181224384	C	T	DOID:4159 / skin cancer/HML8	AB	6122	MU58883361		intergenic_region
Canon	8	115295415	G	A	DOID:4159 / skin cancer/HERVH	GE	2937	MU31759113	RP11-267L5.1	intron_variant
Canon	7	119700343	G	A	DOID:4159 / skin cancer/HERV3	GE	2608	MU60376377		intergenic_region
Canon	10	37569223	A	G	DOID:4159 / skin cancer/HERV9	GE	3224	MU38464528	ATP8A2P1	intron_variant
Canon	7	118828159	T	G	DOID:4159 / skin cancer/HERVL	S	2605	MU36097647		intergenic_region
Canon	7	82269394	G	A	DOID:4159 / skin cancer/HERV9	GE	2542	MU48669025		intergenic_region
Canon	12	61347057	G	A	DOID:4159 / skin cancer/HERVH	GE	3816	MU62758961		intergenic_region
Canon	7	138015513	G	A	DOID:4159 / skin cancer/HERVH	GE	2646	MU49731984		intergenic_region
Canon	8	65036659	C	T	DOID:4159 / skin cancer/HERVL	S	2845	MU54233593	RP11-32K4.1	intron_variant
Canon	1	191205117	G	A	DOID:4159 / skin cancer/HERVL	S	6143	MU48157110		intergenic_region
Canon	3	21231653	G	A	DOID:4159 / skin cancer/HERVH	GE	890	MU53795784		intergenic_region
Canon	1	166576324	G	A	DOID:4159 / skin cancer/HML2	AB	6089	MU60202563	FMO9P	intron_variant
Canon	14	85028171	C	T	DOID:4159 / skin cancer/MER52	GE	4195	MU57589673		intergenic_region
Canon	3	163625722	G	A	DOID:4159 / skin cancer/HERVH	GE	1208	MU47187043		intergenic_region
Canon	8	113213372	G	A	DOID:4159 / skin cancer/HERVH	GE	2930	MU50561396		intergenic_region
Canon	5	3948295	G	A	DOID:5041 / esophageal cancer/HERVL	S	1746	MU14303367		intergenic_region
Canon	3	103317140	C	T	DOID:4159 / skin cancer/HERVL	S	1049	MU39160380		intergenic_region
Canon	2	116943300	T	C	DOID:4159 / skin cancer/HERVH	GE	655	MU49780438		intergenic_region
Canon	19	21852684	G	A	DOID:4159 / skin cancer/HML3	AB	4659	MU41824097		intergenic_region
Canon	3	87661326	G	A	DOID:4159 / skin cancer/HERVIP	GE	1011	MU35609558		intergenic_region
Canon	12	127099280	C	T	DOID:4159 / skin cancer/HERVIP	GE	3913	MU50894051	RP11-407A16.8	downstream_gene_variant
Canon	3	163739783	C	T	DOID:4159 / skin cancer/HERVFB	GE	1209	MU560449		intergenic_region
Canon	21	14427216	A	G	DOID:1793 / pancreatic cancer/HERVIP	GE	4858	MU29926621	ANKRD30BP2	intron_variant
Canon	16	62680154	G	T	DOID:1324 / lung cancer/MER52	GE	4400	MU54098774		intergenic_region
Canon	7	91078989	C	T	DOID:4159 / skin cancer/HERV9	GE	2554	MU59158423	RP11-115N4.1	intron_variant
Canon	4	45535327	C	T	DOID:4159 / skin cancer/HERV9	GE	1392	MU52700160		intergenic_region
Canon	2	76104893	C	T	DOID:4159 / skin cancer/HERVW	GE	577	MU53680866		intergenic_region
Canon	9	23919481	C	T	DOID:4159 / skin cancer/HERV9	GE	3020	MU49416461		intergenic_region
Canon	2	193785465	C	T	DOID:4159 / skin cancer/HERVH	GE	778	MU39608712		intergenic_region
Canon	2	82258052	C	T	DOID:263 / kidney cancer/HML9	AB	594	MU3910855		intergenic_region
Canon	2	148070410	T	A	DOID:1319 / brain cancer/HERV9	GE	702	MU68390897		intergenic_region
Canon	4	12366365	G	A	DOID:4159 / skin cancer/HERVH	GE	1324	MU49153423		intergenic_region
Canon	3	26315304	G	A	DOID:4159 / skin cancer/HEPSI2	GE	897	MU61227966		intergenic_region
Canon	1	5110423	T	A	DOID:5041 / esophageal cancer/HERVH	GE	5811	MU70352178		intergenic_region
Canon	7	145750763	A	T	DOID:3571 / liver cancer/HERVADP	GE	2666	MU29853833		intergenic_region
Canon	3	172878419	G	A	DOID:4159 / skin cancer/HERVH	GE	1237	MU50276474	RP11-324C10.1	intron_variant
Canon	6	62033814	C	T	DOID:4159 / skin cancer/MER52	GE	2161	MU45261076		intergenic_region
Canon	3	176224474	C	T	DOID:4159 / skin cancer/HUERSP3	GE	1247	MU43876167		intergenic_region
Canon	3	176043687	G	A	DOID:4159 / skin cancer/HERVH	GE	1246	MU53208162		intergenic_region
Canon	6	63793928	G	A	DOID:4159 / skin cancer/HERV9	GE	2169	MU62461564		intergenic_region
Canon	11	81711840	G	A	DOID:4159 / skin cancer/MER52	GE	3564	MU49329813	RP11-179A16.1	intron_variant
Canon	7	91083166	G	A	DOID:4159 / skin cancer/HERV9	GE	2554	MU55224043	RP11-115N4.1	intron_variant
Canon	2	13304468	G	A	DOID:4159 / skin cancer/HERVH	GE	472	MU41696605		intergenic_region
Canon	1	247869437	C	T	DOID:4159 / skin cancer/HERVL	S	6254	MU41798382	RP11-634B7.4	intron_variant
Canon	5	46005808	C	T	DOID:4159 / skin cancer/HML2	AB	1836	MU43581563		intergenic_region
Canon	8	91106715	G	A	DOID:4159 / skin cancer/HERVH	GE	2897	MU55593502	CALB1	intron_variant
Canon	8	138840982	C	A	DOID:3571 / liver cancer/HERVH	GE	2972	MU4942653	RP11-238K6.1	intron_variant
Canon	6	62042237	T	G	DOID:5041 / esophageal cancer/MER52	GE	2161	MU26694060		intergenic_region
Canon	11	80748943	C	A	DOID:8618 / oral cavity cancer/HML5	AB	3557	MU67361791		intergenic_region
Canon	12	39331889	G	T	DOID:5041 / esophageal cancer/HERVIP	GE	3770	MU70642236		intergenic_region
Canon	8	5687413	C	T	DOID:4159 / skin cancer/HERVIP	GE	2688	MU35279380		intergenic_region
Canon	3	163633000	C	T	DOID:10283 / prostate cancer/HERVH	GE	1208	MU186796		intergenic_region
Canon	7	136259338	G	A	DOID:4159 / skin cancer/HERVL	S	2641	MU61944205		intergenic_region
Canon	11	80749838	C	T	DOID:4159 / skin cancer/HML5	AB	3557	MU57083721		intergenic_region
Canon	14	87704820	G	A	DOID:4159 / skin cancer/HERVH	GE	4204	MU42069405		intergenic_region
Canon	11	132249808	C	A	DOID:2394 / ovarian cancer/HERVL	S	3676	MU6406131		intergenic_region
Canon	8	43414196	G	A	DOID:4159 / skin cancer/HERVT	GE	2781	MU44423916		intergenic_region
Canon	8	115295458	T	C	DOID:5041 / esophageal cancer/HERVH	GE	2937	MU18101935	RP11-267L5.1	intron_variant
Canon	12	118092316	C	T	DOID:5041 / esophageal cancer/HERVL	S	3906	MU23134881	KSR2	intron_variant
Canon	4	163632568	C	T	DOID:4159 / skin cancer/HERVH	GE	1676	MU60055386		intergenic_region
Canon	4	64862678	G	T	DOID:3571 / liver cancer/HEPSI3	GE	1428	MU2875651		intergenic_region
Canon	18	49483396	G	T	DOID:2394 / ovarian cancer/ERV1_ARTIODACT	GE	4562	MU8708411		intergenic_region
Canon	3	167140642	C	T	DOID:5041 / esophageal cancer/HERVH	GE	1225	MU16318012		intergenic_region
Canon	5	103403696	C	T	DOID:4159 / skin cancer/HERVH	GE	1925	MU63103795		intergenic_region
Canon	3	6444639	T	G	DOID:1612 / breast cancer/HERVH	GE	860	MU65135295		intergenic_region
Canon	11	127643900	G	A	DOID:4159 / skin cancer/HERVH	GE	3672	MU33507043		intergenic_region
Canon	2	115880247	G	A	DOID:4159 / skin cancer/MER50	GE	654	MU44501474	DPP10	intron_variant
Canon	3	36173246	C	T	DOID:4159 / skin cancer/MER52	GE	918	MU56938533		intergenic_region
Canon	18	54083679	T	A	DOID:4159 / skin cancer/HERVH	GE	4566	MU47969949		intergenic_region
Canon	21	18265283	C	T	DOID:4159 / skin cancer/HERVH	GE	4866	MU59761333		intergenic_region
Canon	12	127966852	G	A	DOID:4159 / skin cancer/HERVE	GE	3915	MU57748840		intergenic_region
Canon	5	45801687	C	G	DOID:1324 / lung cancer/MER52	GE	1834	MU59057486		intergenic_region
Canon	6	123908159	G	T	DOID:1612 / breast cancer/HERVH	GE	2325	MU63495018	TRDN	intron_variant
Canon	6	63788639	C	T	DOID:4159 / skin cancer/HERV9	GE	2169	MU46155042		intergenic_region
Canon	11	39153897	G	A	DOID:4159 / skin cancer/HERVL	S	3445	MU61414901		intergenic_region
Canon	10	107779769	G	A	DOID:4159 / skin cancer/HERVH	GE	3349	MU39959243		intergenic_region
Canon	18	49482508	C	T	DOID:4159 / skin cancer/ERV1_ARTIODACT	GE	4562	MU55887247		intergenic_region
Canon	2	81878235	C	T	DOID:4159 / skin cancer/HERVIP	GE	593	MU57133266		intergenic_region
Canon	4	65432505	C	T	DOID:4159 / skin cancer/HML3	AB	1434	MU37485771		intergenic_region
Canon	11	133499499	T	C	DOID:5672 / large intestine cancer/HERVH	GE	3677	COSN20445307	.	SNP
Canon	8	43750861	T	C	DOID:4159 / skin cancer/HML8	AB	2788	MU61844967		intergenic_region
Canon	12	127969742	G	A	DOID:4159 / skin cancer/HERVE	GE	3915	MU48539762		intergenic_region
Canon	1	71974957	G	A	DOID:4159 / skin cancer/HERVADP	GE	5921	MU39528627	NEGR1	intron_variant
Canon	2	79282556	C	T	DOID:4159 / skin cancer/HERVH	GE	586	MU59205904		intergenic_region
Canon	3	163742727	T	G	DOID:4159 / skin cancer/HERVFB	GE	1209	MU62762059		intergenic_region
Canon	2	116942656	G	A	DOID:4159 / skin cancer/HERVH	GE	655	MU45169308		intergenic_region
Canon	2	188068051	G	A	DOID:4159 / skin cancer/HERVL	S	767	MU56058204	AC007319.1	intron_variant
Canon	7	82270334	C	T	DOID:4159 / skin cancer/HERV9	GE	2542	MU43259229		intergenic_region
Canon	6	121251479	C	T	DOID:4159 / skin cancer/HERVH	GE	2314	MU59144164		intergenic_region
Canon	6	63790097	C	A	DOID:2394 / ovarian cancer/HERV9	GE	2169	MU8753432		intergenic_region
Canon	6	94371394	T	G	DOID:4159 / skin cancer/HERVL	S	2261	MU40341370		intergenic_region
Canon	11	123736448	A	T	DOID:2531 / hematologic cancer/HERVH	GE	3663	MU42059125		intergenic_region
Canon	6	63297081	G	T	DOID:4159 / skin cancer/HERVH	GE	2166	MU71261268		intergenic_region
Canon	8	47566244	C	T	DOID:4159 / skin cancer/HML5	AB	2798	MU42278059		intergenic_region
Canon	7	54025559	A	T	DOID:4159 / skin cancer/HERV9	GE	2496	MU51440124		intergenic_region
Canon	5	29391467	C	T	DOID:1793 / pancreatic cancer/HERVFB	GE	1790	MU5582279	CTD-2010I22.2	intron_variant
Canon	6	57622174	T	G	DOID:5041 / esophageal cancer/HML2	AB	2153	MU36796804		intergenic_region
Canon	3	145274452	G	A	DOID:4159 / skin cancer/HERVH	GE	1151	MU34846737		intergenic_region
Canon	2	156243	C	T	DOID:5041 / esophageal cancer/HERVW	GE	460	MU69759204		intergenic_region
Canon	3	34846397	A	G	DOID:1793 / pancreatic cancer/HEPSI1	GE	916	MU5139087		intergenic_region
Canon	12	114509965	G	A	DOID:4159 / skin cancer/HERVIP	GE	3905	MU47951128		intergenic_region
Canon	2	141186534	C	G	DOID:4159 / skin cancer/HERVH	GE	695	MU45989511	LRP1B	intron_variant
Canon	22	35235920	C	T	DOID:4159 / skin cancer/HERVH	GE	6281	MU42228076		intergenic_region
Canon	3	161874436	G	A	DOID:1324 / lung cancer/HERVH	GE	1199	MU42710364		intergenic_region
Canon	2	78197660	T	C	DOID:5041 / esophageal cancer/HERVH	GE	584	MU23847865		intergenic_region
Canon	1	166576685	C	T	DOID:4159 / skin cancer/HML2	AB	6089	MU60038498	FMO9P	intron_variant
Canon	12	21100098	C	G	DOID:4159 / skin cancer/HUERSP3	GE	3732	MU43821232	LST3	intron_variant
Canon	12	118094864	G	A	DOID:1319 / brain cancer/HERVL	S	3906	MU9285204	KSR2	intron_variant
Canon	1	248500030	A	C	DOID:5041 / esophageal cancer/HERVH	GE	6259	MU20188989		intergenic_region
Canon	6	115555828	G	A	DOID:4159 / skin cancer/HERV9	GE	2298	MU62187227		intergenic_region
Canon	11	81740716	T	A	DOID:4159 / skin cancer/HERVH	GE	3565	MU46020457	RP11-179A16.1	intron_variant
Canon	4	35340745	A	C	DOID:5041 / esophageal cancer/HERVL	S	1370	MU17893773		intergenic_region
Canon	7	125558682	C	T	DOID:10283 / prostate cancer/HERVH	GE	2627	MU57700745	AC005276.1	intron_variant
Canon	4	45534036	G	A	DOID:4159 / skin cancer/HERV9	GE	1392	MU61548126		intergenic_region
Canon	7	91080464	C	T	DOID:4159 / skin cancer/HERV9	GE	2554	MU54750275	RP11-115N4.1	intron_variant
Canon	14	85027368	C	T	DOID:4159 / skin cancer/MER52	GE	4195	MU54720280		intergenic_region
Canon	10	42886708	T	C	DOID:1324 / lung cancer/HERVFA	GE	3231	MU51692486		intergenic_region
Canon	12	34680283	C	T	DOID:4159 / skin cancer/HML8	AB	3761	MU41875154		intergenic_region
Canon	14	106658744	G	A	DOID:4159 / skin cancer/HERVT	GE	4229	MU57001255		intergenic_region
Canon	7	54518474	C	T	DOID:4159 / skin cancer/HML3	AB	2498	MU44727706		intergenic_region
Canon	3	26318396	C	T	DOID:4159 / skin cancer/HEPSI2	GE	897	MU42132612		intergenic_region
Canon	8	5733688	T	G	DOID:2531 / hematologic cancer/HML5	AB	2691	MU68706193		intergenic_region
Canon	6	62037053	C	T	DOID:4159 / skin cancer/MER52	GE	2161	MU50604304		intergenic_region
Canon	6	62034535	C	T	DOID:4159 / skin cancer/MER52	GE	2161	MU44439000		intergenic_region
Canon	2	81882335	C	A	DOID:5041 / esophageal cancer/HERVIP	GE	593	MU70301040		intergenic_region
Canon	7	145754766	C	T	DOID:4159 / skin cancer/HERVADP	GE	2666	MU46585425		intergenic_region
Canon	11	127643817	G	A	DOID:1793 / pancreatic cancer/HERVH	GE	3672	MU6855321		intergenic_region
Canon	2	195001266	C	T	DOID:1612 / breast cancer/HERVH	GE	780	MU66473259		intergenic_region
Canon	8	47563627	C	T	DOID:4159 / skin cancer/HML5	AB	2798	MU33182719		intergenic_region
Canon	4	167643200	G	A	DOID:1612 / breast cancer/HERVH	GE	1688	MU40561988		intergenic_region
Canon	17	50659210	C	T	DOID:4159 / skin cancer/MER41	GE	4467	MU50848212		intergenic_region
Canon	2	79324316	G	A	DOID:4159 / skin cancer/HERVH48	GE	587	MU43731543		intergenic_region
Canon	13	90308308	G	A	DOID:4159 / skin cancer/PABL	GE	4034	MU56186662		intergenic_region
Canon	4	134869582	G	T	DOID:10283 / prostate cancer/HERVADP	GE	1617	MU56035981	RP11-427M20.1	intron_variant
Canon	2	141188923	C	T	DOID:1793 / pancreatic cancer/HERVH	GE	695	MU6158502	LRP1B	intron_variant
Canon	2	76104611	G	A	DOID:4159 / skin cancer/HERVW	GE	577	MU44594539		intergenic_region
Canon	10	107780829	T	C	DOID:1612 / breast cancer/HERVH	GE	3349	MU65775210		intergenic_region
Canon	11	29542695	G	A	DOID:4159 / skin cancer/HERV3	GE	3431	MU41415400	RP11-460B17.3	intron_variant
Canon	3	162434751	C	T	DOID:4159 / skin cancer/HERVH	GE	1202	MU40902309		intergenic_region
Canon	8	50345072	C	T	DOID:4159 / skin cancer/HERV9	GE	2813	MU59759488		intergenic_region
Canon	8	65035330	C	T	DOID:4159 / skin cancer/HERVL	S	2845	MU61347043	RP11-32K4.1	intron_variant
Canon	8	5686207	G	A	DOID:4159 / skin cancer/HERVIP	GE	2688	MU41402335		intergenic_region
Canon	10	42885538	G	A	DOID:4159 / skin cancer/HERVFA	GE	3231	MU41336976		intergenic_region
Canon	17	50659080	G	T	DOID:4159 / skin cancer/MER41	GE	4467	MU40843180		intergenic_region
Canon	2	52253127	C	T	DOID:10283 / prostate cancer/HERVH	GE	534	MU14679997	AC007682.1	intron_variant
Canon	18	4689685	C	T	DOID:4159 / skin cancer/HERVW	GE	4497	MU52130410		intergenic_region
Canon	2	79443865	A	G	DOID:4159 / skin cancer/HERVH	GE	588	MU38432723	CTNNA2	intron_variant
Canon	3	172874741	G	A	DOID:4159 / skin cancer/HERVH	GE	1237	MU35641884	RP11-324C10.1	intron_variant
Canon	12	127970151	G	A	DOID:4159 / skin cancer/HERVE	GE	3915	MU45361157		intergenic_region
Canon	4	179128445	C	T	DOID:4159 / skin cancer/HERVH	GE	1721	MU52720049		intergenic_region
Canon	12	114498762	T	G	DOID:3571 / liver cancer/HERVH	GE	3903	MU2735427		intergenic_region
Canon	3	6439880	G	A	DOID:4159 / skin cancer/HERVH	GE	860	MU54851270		intergenic_region
Canon	5	18536699	C	T	DOID:4159 / skin cancer/HERVH	GE	1766	MU58866522		intergenic_region
Canon	1	241598250	C	T	DOID:4159 / skin cancer/HERVH	GE	6234	MU61439164		intergenic_region
Canon	3	106642057	G	A	DOID:4159 / skin cancer/HERVH	GE	1056	MU48907064	LINC00882	intron_variant
Canon	10	96530520	C	T	DOID:4159 / skin cancer/HERV9	GE	3326	MU45357077	CYP2C19	intron_variant
Canon	19	24504675	C	T	DOID:1793 / pancreatic cancer/HML8	AB	4687	MU5626815		intergenic_region
Canon	18	27002564	C	A	DOID:5041 / esophageal cancer/HML5	AB	4527	MU25730995		intergenic_region
Canon	2	52251330	G	A	DOID:4159 / skin cancer/HERVH	GE	534	MU57180480	AC007682.1	intron_variant
Canon	4	63289216	G	T	DOID:3571 / liver cancer/HERVL	S	1422	MU28953865		intergenic_region
Canon	3	95307748	C	T	DOID:4159 / skin cancer/HERV9	GE	1027	MU36771878		intergenic_region
Canon	2	52253402	G	A	DOID:2531 / hematologic cancer/HERVH	GE	534	MU68879602	AC007682.1	intron_variant
Canon	4	59160358	G	C	DOID:1324 / lung cancer/HERVH	GE	1414	MU48958896		intergenic_region
Canon	2	78193830	C	T	DOID:4159 / skin cancer/HERVH	GE	584	MU54047737		intergenic_region
Canon	7	85370664	C	T	DOID:1612 / breast cancer/HERVIP	GE	2547	MU62584643		intergenic_region
Canon	11	101091302	G	A	DOID:4159 / skin cancer/HML8	AB	3621	MU60054232		intergenic_region
Canon	4	128436423	A	G	DOID:4159 / skin cancer/HERVH	GE	1594	MU43080089		intergenic_region
Canon	4	65433351	G	T	DOID:3571 / liver cancer/HML3	AB	1434	MU921006		intergenic_region
Canon	18	27718892	G	A	DOID:1324 / lung cancer/MER51	GE	4529	MU43534604		intergenic_region
Canon	2	79322416	G	A	DOID:4159 / skin cancer/HERVH48	GE	587	MU56510539		intergenic_region
Canon	1	102555628	A	C	DOID:5041 / esophageal cancer/HERVIP	GE	5986	MU70198135		intergenic_region
Canon	8	54049266	A	C	DOID:1793 / pancreatic cancer/HERV9	GE	2822	MU8186853		intergenic_region
Canon	2	79319567	G	A	DOID:4159 / skin cancer/HERVH48	GE	587	MU62401030		intergenic_region
Canon	4	167443992	G	A	DOID:4159 / skin cancer/HERVH	GE	1687	MU54691638	RP11-217C7.1	intron_variant
Canon	11	39759182	T	C	DOID:5041 / esophageal cancer/HERVH	GE	3449	MU28276614		intergenic_region
Canon	13	87411076	G	A	DOID:4159 / skin cancer/HERVFB	GE	4023	MU46521303		intergenic_region
Canon	6	62313454	C	T	DOID:4159 / skin cancer/HERVH	GE	2164	MU41878265		intergenic_region
Canon	2	79323073	G	A	DOID:4159 / skin cancer/HERVH48	GE	587	MU35517845		intergenic_region
Canon	8	73305331	G	T	DOID:4159 / skin cancer/HERV9	GE	2860	MU62582565		intergenic_region
Canon	5	40110425	C	T	DOID:4159 / skin cancer/HML8	AB	1818	MU36901937		intergenic_region
Canon	8	43753774	T	G	DOID:5041 / esophageal cancer/HML8	AB	2788	MU68269518		intergenic_region
Canon	2	194996692	C	A	DOID:1793 / pancreatic cancer/HERVH	GE	780	MU69445364		intergenic_region
Canon	4	20631921	C	T	DOID:4159 / skin cancer/HERVH	GE	1336	MU47836979		intergenic_region
Canon	3	97966735	T	G	DOID:1612 / breast cancer/HERVH	GE	1036	MU14862507	RP11-325B23.2	intron_variant
Canon	4	17002866	C	T	DOID:3571 / liver cancer/HERVH	GE	1329	MU40740710	RP11-141E13.1	intron_variant
Canon	6	115555345	C	T	DOID:4159 / skin cancer/HERV9	GE	2298	MU46618760		intergenic_region
Canon	6	78302339	C	T	DOID:4159 / skin cancer/HERVL	S	2212	MU51931229		intergenic_region
Canon	6	115556760	G	A	DOID:4159 / skin cancer/HERV9	GE	2298	MU63124300		intergenic_region
Canon	6	63791176	C	T	DOID:4159 / skin cancer/HERV9	GE	2169	MU44999417		intergenic_region
Canon	7	119701652	C	T	DOID:4159 / skin cancer/HERV3	GE	2608	MU37677118		intergenic_region
Canon	18	1856272	G	T	DOID:1324 / lung cancer/HERVL	S	4494	MU47589368		intergenic_region
Canon	6	115562156	G	A	DOID:4159 / skin cancer/HERV9	GE	2298	MU62266149		intergenic_region
Canon	14	85029563	C	T	DOID:4159 / skin cancer/MER52	GE	4195	MU45826982		intergenic_region
Canon	3	162443613	G	T	DOID:1793 / pancreatic cancer/HERVH	GE	1203	MU8067602		intergenic_region
Canon	5	129974477	G	A	DOID:4159 / skin cancer/HERV9	GE	1989	MU54783871		intergenic_region
Canon	11	6090822	G	A	DOID:4159 / skin cancer/HERVH	GE	3393	MU51339109		intergenic_region
Canon	4	19892583	G	A	DOID:5041 / esophageal cancer/HERVH48	GE	1334	MU23795091	RP11-608O21.1	intron_variant
Canon	22	35235360	C	T	DOID:5041 / esophageal cancer/HERVH	GE	6281	MU34977566		intergenic_region
Canon	18	4687766	G	A	DOID:4159 / skin cancer/HERVW	GE	4497	MU56541543		intergenic_region
Canon	8	84421919	A	C	DOID:5041 / esophageal cancer/HERVH	GE	2876	MU14135826		intergenic_region
Canon	3	145272015	G	A	DOID:4159 / skin cancer/HERVH	GE	1151	MU53990573		intergenic_region
Canon	8	73305862	A	G	DOID:1793 / pancreatic cancer/HERV9	GE	2860	MU32676651		intergenic_region
Canon	1	195705332	G	A	DOID:5041 / esophageal cancer/MER50	GE	6148	MU37542859		intergenic_region
Canon	2	115068848	G	A	DOID:4159 / skin cancer/HERVL	S	653	MU49070383		intergenic_region
Canon	19	22756342	G	A	DOID:4159 / skin cancer/HERVH	GE	4670	MU43682985		intergenic_region
Canon	11	123739424	T	G	DOID:3571 / liver cancer/HERVH	GE	3663	MU6596245		intergenic_region
Canon	14	80696501	G	A	DOID:4159 / skin cancer/HERVL	S	4189	MU58010163	DIO2	intron_variant
Canon	5	46009178	C	T	DOID:1612 / breast cancer/HML2	AB	1836	MU65958332		intergenic_region
Canon	8	47563516	C	G	DOID:4159 / skin cancer/HML5	AB	2798	MU39428808		intergenic_region
Canon	8	73301301	G	A	DOID:4159 / skin cancer/HERV9	GE	2860	MU35320734		intergenic_region
Canon	4	131935646	T	G	DOID:1612 / breast cancer/MER51	GE	1603	MU65421233		intergenic_region
Canon	1	102558114	T	C	DOID:5041 / esophageal cancer/HERVIP	GE	5986	MU33144094		intergenic_region
Canon	3	82692589	T	G	DOID:5041 / esophageal cancer/MER52	GE	999	MU70412696		intergenic_region
Canon	8	35814733	C	T	DOID:4159 / skin cancer/HERVE	GE	2763	MU46512796	RP11-473J6.1	intron_variant
Canon	7	85721737	C	T	DOID:4159 / skin cancer/HERVL	S	2548	MU41566558		intergenic_region
Canon	1	195701395	T	C	DOID:5041 / esophageal cancer/MER50	GE	6148	MU70056771		intergenic_region
Canon	4	20634204	C	T	DOID:2394 / ovarian cancer/HERVH	GE	1336	MU7520359		intergenic_region
Canon	7	54028053	G	A	DOID:5041 / esophageal cancer/HERV9	GE	2496	MU2220304		intergenic_region
Canon	12	34676020	C	A	DOID:1612 / breast cancer/HML8	AB	3761	MU65485530		intergenic_region
Canon	4	137535251	C	T	DOID:4159 / skin cancer/HERVH	GE	1629	MU62863513		intergenic_region
Canon	21	18291532	C	T	DOID:3571 / liver cancer/HERVH	GE	4867	MU3812141		intergenic_region
Canon	3	172997904	C	T	DOID:4159 / skin cancer/HERVH48	GE	1239	MU49660728	RP11-324C10.1	intron_variant
Canon	5	103404605	A	G	DOID:2531 / hematologic cancer/HERVH	GE	1925	MU50454079		intergenic_region
Canon	15	95303171	T	C	DOID:4159 / skin cancer/HERVH	GE	4319	MU46546013		intergenic_region
Canon	6	62037650	G	T	DOID:4159 / skin cancer/MER52	GE	2161	MU58814449		intergenic_region
Canon	1	166579310	C	T	DOID:4159 / skin cancer/HML2	AB	6089	MU50649913	FMO9P	intron_variant
Canon	2	35031392	G	A	DOID:1793 / pancreatic cancer/HERVH	GE	505	MU12211962	AC012593.1	intron_variant
Canon	6	94376244	G	C	DOID:2394 / ovarian cancer/HERVL	S	2261	COSN9814260	.	.
Canon	4	93197675	A	T	DOID:2531 / hematologic cancer/HERVH	GE	1513	MU67554980	RP11-562F9.2	intron_variant
Canon	16	35137911	C	T	DOID:5041 / esophageal cancer/HERVH	GE	4379	MU20352297		intergenic_region
Canon	4	64050883	A	G	DOID:1793 / pancreatic cancer/HERV9	GE	1426	MU69071890		intergenic_region
Canon	3	147598135	C	T	DOID:4159 / skin cancer/HUERSP2	GE	1159	MU50068876		intergenic_region
Canon	14	40367791	C	T	DOID:4159 / skin cancer/HERVL	S	4116	MU62289673		intergenic_region
Canon	19	20706526	G	A	DOID:4159 / skin cancer/HERVH	GE	4645	MU38608769	CTC-513N18.6	intron_variant
Canon	8	114535838	T	A	DOID:4159 / skin cancer/MER50	GE	2934	MU50355378		intergenic_region
Canon	3	166990690	C	T	DOID:4159 / skin cancer/HERVIP	GE	1224	MU50416007	ZBBX	intron_variant
Canon	2	124255336	T	G	DOID:5041 / esophageal cancer/HERVL	S	667	MU70409841		intergenic_region
Canon	3	6440518	C	A	DOID:3571 / liver cancer/HERVH	GE	860	MU6702451		intergenic_region
Canon	9	118601643	C	T	DOID:1793 / pancreatic cancer/HERVH	GE	3151	MU69401852		intergenic_region
Canon	2	79440424	A	G	DOID:4159 / skin cancer/HERVH	GE	588	MU54765698	CTNNA2	intron_variant
Canon	4	12365526	C	T	DOID:4159 / skin cancer/HERVH	GE	1324	MU45109953		intergenic_region
Canon	8	54049470	C	T	DOID:4159 / skin cancer/HERV9	GE	2822	MU43852753		intergenic_region
Canon	8	64834619	C	T	DOID:4159 / skin cancer/HERVL	S	2844	MU42252663	RP11-32K4.1	intron_variant
Canon	18	27001310	T	C	DOID:263 / kidney cancer/HML5	AB	4527	MU4098208		intergenic_region
Canon	1	5106878	G	A	DOID:1612 / breast cancer/HERVH	GE	5811	MU66385287		intergenic_region
Canon	3	67091647	G	A	DOID:4159 / skin cancer/HERVH	GE	971	MU67685792		intergenic_region
Canon	2	41726576	A	G	DOID:5041 / esophageal cancer/HUERSP3	GE	521	MU203489		intergenic_region
Canon	1	195706789	G	A	DOID:4159 / skin cancer/MER50	GE	6148	MU51394831		intergenic_region
Canon	20	38353834	T	A	DOID:5041 / esophageal cancer/HML3	AB	4837	MU18423108		intergenic_region
Canon	9	23921588	T	C	DOID:5041 / esophageal cancer/HERV9	GE	3020	MU439293		intergenic_region
Canon	19	20658516	G	T	DOID:3571 / liver cancer/HERVH48	GE	4644	MU6935686	CTC-513N18.6	intron_variant
Canon	11	127643812	T	G	DOID:5041 / esophageal cancer/HERVH	GE	3672	MU68318746		intergenic_region
Canon	14	80693210	A	T	DOID:5041 / esophageal cancer/HERVL	S	4189	MU70535993	DIO2	intron_variant
Canon	7	119697699	G	A	DOID:4159 / skin cancer/HERV3	GE	2608	MU57426449		intergenic_region
Canon	1	191209486	G	A	DOID:4159 / skin cancer/HERVL	S	6143	MU48046892		intergenic_region
Canon	8	47566445	C	G	DOID:1612 / breast cancer/HML5	AB	2798	MU64204689		intergenic_region
Canon	7	91080188	G	A	DOID:5041 / esophageal cancer/HERV9	GE	2554	MU494055	RP11-115N4.1	intron_variant
Canon	18	4688506	G	A	DOID:1793 / pancreatic cancer/HERVW	GE	4497	MU5356247		intergenic_region
Canon	11	101090775	G	A	DOID:4159 / skin cancer/HML8	AB	3621	MU46591298		intergenic_region
Canon	2	229171183	T	G	DOID:5041 / esophageal cancer/HUERSP3	GE	833	MU20015041		intergenic_region
Canon	11	39758274	C	T	DOID:4159 / skin cancer/HERVH	GE	3449	MU58409443		intergenic_region
Canon	6	123907578	G	A	DOID:4159 / skin cancer/HERVH	GE	2325	MU50473631	TRDN	intron_variant
Canon	21	17352231	C	T	DOID:4159 / skin cancer/HERVH	GE	4864	MU57830987		intergenic_region
Canon	6	78222673	C	A	DOID:4159 / skin cancer/HUERSP3	GE	2211	MU36544402		intergenic_region
Canon	12	128097970	G	A	DOID:4159 / skin cancer/HERV9	GE	3916	MU63146096		intergenic_region
Canon	11	49347255	T	C	DOID:3571 / liver cancer/HERVH	GE	3466	MU29348190	CTD-2026G22.1	intron_variant
Canon	11	80910470	G	T	DOID:4159 / skin cancer/HERVADP	GE	3558	MU43581159		intergenic_region
Canon	10	37569885	C	T	DOID:4159 / skin cancer/HERV9	GE	3224	MU45881298	ATP8A2P1	intron_variant
Canon	3	176044500	G	A	DOID:4159 / skin cancer/HERVH	GE	1246	MU57617842		intergenic_region
Canon	3	36174041	G	A	DOID:4159 / skin cancer/MER52	GE	918	MU40933453		intergenic_region
Canon	3	6439212	C	T	DOID:3571 / liver cancer/HERVH	GE	860	MU3303791		intergenic_region
Canon	11	127640029	G	A	DOID:4159 / skin cancer/HERVH	GE	3672	MU61489132		intergenic_region
Canon	2	155725885	C	A	DOID:1324 / lung cancer/HERVH	GE	721	MU57879950		intergenic_region
Canon	19	22751593	G	A	DOID:4159 / skin cancer/HERVH	GE	4670	MU60595763		intergenic_region
Canon	3	145269235	G	A	DOID:4159 / skin cancer/HERVH	GE	1151	MU52576772		intergenic_region
Canon	19	24508190	T	A	DOID:4159 / skin cancer/HML8	AB	4687	MU47555520		intergenic_region
Canon	5	12668217	C	T	DOID:4159 / skin cancer/HERVH	GE	1758	MU49090927	CT49	intron_variant
Canon	13	87844015	A	G	DOID:3571 / liver cancer/HERVH	GE	4024	MU3729369		intergenic_region
Canon	4	136089911	G	C	DOID:1793 / pancreatic cancer/HERVH	GE	1624	MU30667391		intergenic_region
Canon	5	129970143	G	A	DOID:4159 / skin cancer/HERV9	GE	1989	MU55498867		intergenic_region
Canon	10	37569984	T	C	DOID:4159 / skin cancer/HERV9	GE	3224	MU36989099	ATP8A2P1	intron_variant
Canon	6	58738015	G	A	DOID:4159 / skin cancer/HML3	AB	2156	MU39803408		intergenic_region
Canon	18	1859285	G	A	DOID:4159 / skin cancer/HERVL	S	4494	MU58563052		intergenic_region
Canon	4	128432117	G	A	DOID:4159 / skin cancer/HERVH	GE	1594	MU60506670		intergenic_region
Canon	11	80745961	G	A	DOID:4159 / skin cancer/HML5	AB	3557	MU54327208		intergenic_region
Canon	1	191209234	T	C	DOID:1324 / lung cancer/HERVL	S	6143	MU5251603		intergenic_region
Canon	2	195026026	A	G	DOID:10283 / prostate cancer/HERVADP	GE	782	COSN19596838	.	.
Canon	3	95306650	G	T	DOID:3571 / liver cancer/HERV9	GE	1027	MU6876530		intergenic_region
Canon	6	61945464	C	T	DOID:4159 / skin cancer/HML3	AB	2159	MU61674062		intergenic_region
Canon	1	241602997	C	T	DOID:4159 / skin cancer/HERVH	GE	6234	MU57065874		intergenic_region
Canon	18	27716769	A	T	DOID:5041 / esophageal cancer/MER51	GE	4529	MU22063924		intergenic_region
Canon	18	27001088	C	T	DOID:4159 / skin cancer/HML5	AB	4527	MU44059532		intergenic_region
Canon	3	103317196	C	T	DOID:4159 / skin cancer/HERVL	S	1049	MU39160384		intergenic_region
Canon	4	70060856	A	C	DOID:5041 / esophageal cancer/HML8	AB	1450	MU21288182	UGT2B11	downstream_gene_variant
Canon	20	38354413	A	C	DOID:5041 / esophageal cancer/HML3	AB	4837	MU67369210		intergenic_region
Canon	8	5295599	A	G	DOID:5041 / esophageal cancer/HERVH	GE	2687	MU215689		intergenic_region
Canon	2	76100781	G	A	DOID:4159 / skin cancer/HERVW	GE	577	MU62173513		intergenic_region
Canon	11	101082815	G	A	DOID:4159 / skin cancer/HML8	AB	3621	MU45733347		intergenic_region
Canon	10	42881517	C	T	DOID:1324 / lung cancer/HERVFA	GE	3231	MU61265114		intergenic_region
Canon	1	188304782	T	C	DOID:4159 / skin cancer/HERVL	S	6135	MU54244347		intergenic_region
Canon	10	42883434	C	T	DOID:4159 / skin cancer/HERVFA	GE	3231	MU41517188		intergenic_region
Canon	6	57630897	T	G	DOID:5041 / esophageal cancer/HML2	AB	2153	MU22679210		intergenic_region
Canon	8	138297245	G	T	DOID:1324 / lung cancer/HERVH48	GE	2970	MU11234136		intergenic_region
Canon	18	1859602	C	T	DOID:4159 / skin cancer/HERVL	S	4494	MU59480140		intergenic_region
Canon	1	191207490	A	C	DOID:2531 / hematologic cancer/HERVL	S	6143	MU1567011		intergenic_region
Canon	9	121249414	G	A	DOID:1793 / pancreatic cancer/HERVH	GE	3155	MU69750050		intergenic_region
Canon	10	42888648	T	C	DOID:4159 / skin cancer/HERVFA	GE	3231	MU33362460		intergenic_region
Canon	18	49483085	G	A	DOID:4159 / skin cancer/ERV1_ARTIODACT	GE	4562	MU53712984		intergenic_region
Canon	12	21104665	C	T	DOID:4159 / skin cancer/HUERSP3	GE	3732	MU42962632	LST3	intron_variant
Canon	7	119700404	T	C	DOID:4159 / skin cancer/HERV3	GE	2608	MU52204481		intergenic_region
[truncated: 191,440 more rows]
