# Supplementary material for: Investigation of somatic single nucleotide variations in human endogenous retrovirus elements and their potential association with cancer
Source: PLoS One. 2019 Apr 1;14(4):e0213770. doi: 10.1371/journal.pone.0213770 (PMC6443178; doi:10.1371/journal.pone.0213770)
Supplement: S11 Table — (XLSX) [file pone.0213770.s013.xlsx]

## Sheet: Sheet1
HERV Group	Gene	Gain|Phosphorylation	Loss|ligand Binding Site	Loss|+1 from N-linked Glycosylation	Gain|Glycosylation	Loss|+2 from N-linked Glycosylation	Number of functional sites	Number of mutations
HERV9	TNN	9	3	0	0	0	12	35
HERVIP	OR4K15	29	0	1	1	0	31	116
HERVW	ZNF99	65	0	0	8	0	73	249
MST	KIR2DL1	27	6	2	4	1	40	92
