# Supplementary material for: Investigation of somatic single nucleotide variations in human endogenous retrovirus elements and their potential association with cancer
Source: PLoS One. 2019 Apr 1;14(4):e0213770. doi: 10.1371/journal.pone.0213770 (PMC6443178; doi:10.1371/journal.pone.0213770)
Supplement: S12 Table — (XLSX) [file pone.0213770.s014.xlsx]

## Sheet: lncRNA
HERV Sequence	HERV genus	HERV groups	HERV ID	Functional site/ lncRNA	number of SNVs
Canon	GE	HERVH	2107	lnc-OR14J1-2:3	238
Canon	S	HERVL	6254	lnc-OR2G3-1:2	235
Canon	GE	LTR46	3609	lnc-CCDC82-1:1	201
Canon	GE	HERVIP	5986	lnc-OLFM3-3:1	192
Canon	GE	HERVH	2627	lnc-ARF5-6:1	204
Canon	GE	HERV9	1791	lnc-CDH6-5:1	224
Canon	GE	HERVH	584	lnc-REG3G-8:1	171
Canon	GE	HERVH	1056	lnc-CBLB-7:9	150
Canon	GE	HERVH	1056	lnc-CBLB-7:4	20
Canon	GE	HERVFA	1928	lnc-NUDT12-6:1	195
Canon	GE	HERVH	4024	lnc-SLITRK5-17:1	93
Canon	GE	HERVH	1237	lnc-NLGN1-2:1	208
Canon	GE	HERVH	5946	lnc-LPHN2-2:2	167
Canon	GE	HERVH	3349	lnc-SORCS3-12:1	32
Canon	GE	HERVH	1594	lnc-MFSD8-9:1	174
Canon	GE	HERVH48	1239	lnc-NLGN1-2:1	152
Canon	GE	HERVH	1925	lnc-C5orf30-7:1	110
Canon	AB	HML3	1593	lnc-MFSD8-3:2	139
Canon	GE	HERVH	580	lnc-MRPL19-17:1	10
Canon	GE	HERVE	1632	lnc-CCRN4L-10:1	12
Canon	AB	HML8	4642	lnc-ZNF486-11:1	267
Canon	GE	HERVH	3760	lnc-ALG10-5:1	191
Canon	GE	HERV9	3420	lnc-RP11-17A1.2.1-7:1	26
Canon	GE	HUERSP3	833	lnc-SPHKAP-2:1	321
Canon	GE	HERV9	3224	lnc-ANKRD30A-8:1	44
Canon	GE	HERVH	5940	lnc-IFI44-8:1	127
Canon	GE	HERVH	505	lnc-CRIM1-1:1	153
Canon	GE	HERV3	3431	lnc-KCNA4-3:1	2
Canon	GE	HERVH	3349	lnc-SORCS3-11:1	46
Canon	GE	HERVH	4201	lnc-GALC-13:1	75
Canon	GE	HERVH	1036	lnc-OR5H6-1:1	217
Canon	GE	LTR46	3609	lnc-JRKL-3:1	5
Canon	GE	HERVH	2565	lnc-CALCR-1:1	147
Canon	GE	HERV9	3224	lnc-ANKRD30A-2:4	364
Canon	GE	HERVH	534	lnc-CHAC2-4:1	146
Canon	GE	HERVT	4374	lnc-CTD-2144E22.5.1-5:1	330
Canon	GE	HERVH	2609	lnc-TSPAN12-7:1	272
Canon	GE	HERVH	889	lnc-KAT2B-10:1	20
Canon	GE	HERVH	788	lnc-SATB2-4:1	181
Canon	GE	HERVH	1246	lnc-NAALADL2-10:1	59
Canon	AB	HML3	4659	lnc-ZNF429-2:1	167
Canon	GE	HERVH	3565	lnc-FAM181B-6:2	190
Canon	GE	HERVH	1688	lnc-TLL1-2:1	44
Canon	GE	HERVT	3253	lnc-MBL2-7:1	86
Canon	GE	HERVT	3253	lnc-MBL2-7:2	135
Canon	GE	HERVH	1687	lnc-SPOCK3-2:1	207
Canon	GE	HERVH	3903	lnc-RBM19-4:1	226
Canon	GE	HERVH	5938	lnc-ELTD1-10:1	141
Canon	S	HERVL	3445	lnc-C11orf74-14:1	249
Canon	GE	HERVH	4645	lnc-ZNF486-11:1	191
Canon	GE	HERVT	4229	lnc-AL901608.1-3:23	46
Canon	GE	HERVH	1246	lnc-TBL1XR1-6:2	42
Canon	GE	HERVH	1766	lnc-CDH18-5:2	240
Canon	GE	MER52	2310	lnc-MAN1A1-1:3	126
Canon	GE	HERVFB	2042	lnc-ODZ2-1:1	235
Canon	GE	HERVH	1329	lnc-LDB2-1:1	7
Canon	AB	HML8	1450	lnc-UGT2B28-1:1	169
Canon	S	HERVL	2267	lnc-KLHL32-4:10	208
Canon	GE	HERVH	3562	lnc-FAM181B-6:1	240
Canon	GE	HERVADP	1617	lnc-RP11-62N21.1.1-8:1	317
Canon	GE	HERVH	1620	lnc-RP11-62N21.1.1-16:1	97
Canon	GE	HERVIP	3846	lnc-PAWR-3:1	233
Canon	GE	HERVH48	4644	lnc-ZNF486-2:1	14
Canon	GE	HERVH	1329	lnc-LDB2-3:1	72
Canon	GE	HERVH	580	lnc-MRPL19-18:1	137
Canon	GE	HERVH	2937	lnc-RP11-67H2.1.1-1:6	8
Canon	GE	HERVADP	2666	lnc-CNTNAP2-3:1	330
Canon	GE	HERVH	2937	lnc-RP11-67H2.1.1-1:5	171
Canon	GE	HERV9	1909	lnc-CTD-2215E18.1.1-1:1	222
Canon	GE	HERVT	4639	lnc-ZNF737-3:5	241
Canon	GE	HERVH	1151	lnc-AC107021.1-7:1	22
Canon	GE	HERVT	4229	lnc-KIAA0125-5:1	2
Canon	GE	HERVFB	1790	lnc-DROSHA-12:1	322
Canon	GE	HERVH	721	lnc-RPRM-10:1	216
Canon	GE	HERVIP	3905	lnc-RBM19-4:1	215
Canon	GE	HERVH	1329	lnc-CLRN2-5:1	113
Canon	GE	HERVH48	4644	lnc-ZNF486-11:1	182
Canon	GE	HUERSP2	1197	lnc-SPTSSB-5:1	11
Canon	GE	HERVH	1203	lnc-OTOL1-2:2	84
Canon	GE	HERVH	2263	lnc-EPHA7-4:1	214
Canon	GE	ERV1_ARTIODACT	4572	lnc-CCBE1-1:1	223
Canon	GE	HERVH	3466	lnc-AC084851.1-7:1	188
Canon	GE	HERVH	5945	lnc-TTLL7-13:1	195
Canon	GE	HERVH	1513	lnc-GRID2-1:1	48
Canon	GE	HERVH	1203	lnc-OTOL1-8:1	35
Canon	S	HERVL	767	lnc-FAM171B-1:2	171
Canon	GE	HERV9	2554	lnc-MTERF-3:1	229
Canon	GE	HERVH	1717	lnc-GPM6A-1:1	162
Canon	GE	HERV9	3622	lnc-PGR-4:1	271
Canon	S	HERVL	4091	lnc-FOXG1-4:3	173
Canon	GE	HERV3	1576	lnc-TRAM1L1-3:1	137
Canon	GE	HERVH48	1334	lnc-SLIT2-1:1	144
Canon	GE	HERVH	4405	lnc-CDH5-3:1	118
Canon	GE	HERVH	1758	lnc-CTNND2-3:1	136
Canon	GE	HERVH	3261	lnc-MTRNR2L5-6:1	206
Canon	GE	HERVH	2166	lnc-KHDRBS2-3:1	14
Canon	GE	HERVIP	3913	lnc-DHX37-9:11	137
Canon	GE	HERV3	3431	lnc-FSHB-3:1	209
Canon	GE	HERVW	3967	lnc-OLFM4-13:2	309
Canon	GE	HERVH	3969	lnc-PCDH8-11:1	166
Canon	GE	HERVH	472	lnc-TRIB2-3:2	190
Noncanon	AB	HML5	2890	lnc-CNBD1-4:5	148
Noncanon	GE	HERV9	3611	lnc-CCDC82-8:1	1
Noncanon	AB	HML7	1951	lnc-KCNN2-4:1	219
Noncanon	GE	HERVH	1723	lnc-AGA-5:1	272
Noncanon	S	HERVL	4244	lnc-MKRN3-8:1	5
Noncanon	GE	HERV9	914	lnc-PDCD6IP-2:1	190
Noncanon	GE	HERVH	3451	lnc-LRRC4C-2:1	161
Noncanon	AB	HML2	1741	lnc-FRG2-12:1	209
Noncanon	GE	HERVH	1035	lnc-MINA-6:1	15
Noncanon	GE	HERVH	1543	lnc-TACR3-1:1	200
Noncanon	S	HERVL	4244	lnc-MKRN3-7:3	82
Noncanon	GE	MER57	781	lnc-SLC39A10-12:1	296
Noncanon	GE	HERVH	1035	lnc-OR5H15-2:1	2
Noncanon	GE	HERV9	1770	lnc-BASP1-22:1	151
Noncanon	GE	HERVH	4029	lnc-SLITRK5-7:3	280
Noncanon	S	MST	4780	lnc-KIR2DL4-1:1	211
Noncanon	GE	HERVH	3610	lnc-JRKL-2:1	144
Noncanon	GE	RHERVI	4668	lnc-ZNF98-9:2	205
Noncanon	GE	HERVH	2852	lnc-RP11-664D7.4.1-7:1	52
Noncanon	GE	HARLEQUIN	1575	lnc-TRAM1L1-3:1	142
Noncanon	GE	HERVH	3610	lnc-JRKL-4:1	4
Noncanon	GE	RHERVI	1047	lnc-ZPLD1-2:1	230
Noncanon	GE	HERVH	1510	lnc-GRID2-2:1	139
Noncanon	AB	HML5	4657	lnc-ZNF429-4:1	101
Noncanon	S	HERVL	4096	lnc-PRKD1-1:4	339
Noncanon	GE	HERV4	1545	lnc-CISD2-5:1	256
Noncanon	GE	HERVH	3850	lnc-MYF5-2:1	174
Noncanon	S	THE	4231	lnc-AL901608.1-3:9	47
Noncanon	GE	HERVH	4321	lnc-SPATA8-4:1	281
Noncanon	AB	HML3	1844	lnc-CTD-2203A3.1.1-2:2	146
Noncanon	GE	HERVH	2856	lnc-RP11-383H13.1.1-2:4	3
Noncanon	GE	HERVH	1605	lnc-PCDH10-13:1	28
Noncanon	AB	HML3	1223	lnc-ZBBX-1:1	158
Noncanon	GE	RHERVI	1047	lnc-ZPLD1-5:1	3
Noncanon	AB	HML8	4683	lnc-ZNF681-1:1	263
Noncanon	GE	HERVH	2856	lnc-RP11-383H13.1.1-2:3	132
Noncanon	GE	HERVH	5925	lnc-FPGT-10:1	86
Noncanon	GE	HERVH	4401	lnc-CDH8-7:1	247
Noncanon	AB	HML3	1389	lnc-GUF1-1:1	265
Noncanon	AB	HML2	2976	lnc-KCNK9-1:1	47
Noncanon	GE	HERVH	1506	lnc-FAM190A-3:1	45
Noncanon	GE	HUERSP3	1774	lnc-BASP1-23:1	239
Noncanon	AB	HML5	4680	lnc-ZNF675-1:2	21
Noncanon	GE	HERVW	4576	lnc-MC4R-5:1	112
Noncanon	GE	HUERSP3	2094	lnc-PRL-7:1	181
Noncanon	S	HERVL	4015	lnc-SLITRK1-8:1	187
Noncanon	GE	HERVH	2420	lnc-ICA1-6:1	62
Noncanon	GE	HERVH	1245	lnc-NAALADL2-7:1	243
Noncanon	GE	HERVH	3610	lnc-JRKL-5:1	33
Noncanon	GE	HERVH	3818	lnc-FAM19A2-2:1	235
Noncanon	AB	HML3	1532	lnc-C4orf17-1:1	134
Noncanon	AB	HML2	4636	lnc-ZNF682-3:1	241
Noncanon	GE	HERV9	2817	lnc-SNTG1-1:1	397
Noncanon	GE	HERVH	1605	lnc-RP11-62N21.1.1-1:1	170
Noncanon	GE	HERVH	5924	lnc-FPGT-11:1	61
Noncanon	GE	HERVH	2492	lnc-POM121L12-8:1	106
Noncanon	GE	HERVH	3610	lnc-CCDC82-7:1	42
Noncanon	GE	HERV9	4027	lnc-SLITRK5-14:2	56
Noncanon	AB	HML2	1741	lnc-FRG2-1:1	66
Noncanon	GE	HUERSP3	1675	lnc-FSTL5-1:1	5
Noncanon	S	HERVL	6013	lnc-KCND3-1:1	248
Noncanon	GE	HERVH	5924	lnc-NEGR1-6:1	172
Noncanon	GE	HUERSP3	766	lnc-FAM171B-1:2	283
Noncanon	GE	HUERSP3	766	lnc-FAM171B-1:4	50
Noncanon	GE	HERVH	3861	lnc-MGAT4C-3:1	128
Noncanon	GE	HERVH	1186	lnc-MME-6:1	108
Noncanon	GE	HERVH	4121	lnc-LRFN5-4:1	34
Noncanon	GE	HERVH	5925	lnc-FPGT-11:1	45
Noncanon	GE	HERVH	4219	lnc-RP11-204N11.1.1-3:18	334
Noncanon	AB	HML5	4680	lnc-RPSAP58-1:2	12
Noncanon	GE	HERVIP	2812	lnc-C8orf22-1:1	223
Noncanon	GE	HERVFC	3392	lnc-OR56A3-1:1	12
Noncanon	AB	HML5	4680	lnc-RPSAP58-1:1	142
Noncanon	AB	HML6	5988	lnc-COL11A1-1:1	211
Noncanon	AB	HML6	2118	lnc-HLA-DRB5-1:1	31
Noncanon	GE	HERV9	2825	lnc-OPRK1-3:3	272
Noncanon	GE	HERV9	1759	lnc-DNAH5-2:1	170
Noncanon	S	THE	1002	lnc-CADM2-5:2	99
Noncanon	S	THE	4231	lnc-AL901608.1-58:1	1
Noncanon	GE	HERVH	4306	lnc-MRPS11-4:1	43
Noncanon	GE	HERVFC	597	lnc-SUCLG1-8:1	53
Noncanon	GE	HERVH	1194	lnc-OTOL1-6:1	12
Noncanon	GE	HERV9	2194	lnc-LMBRD1-2:1	31
Noncanon	S	THE	606	lnc-EIF2AK3-4:5	1
Noncanon	GE	HERVH	2266	lnc-KLHL32-8:1	279
Noncanon	GE	HERVH	3963	lnc-OLFM4-4:2	291
Noncanon	GE	HERVH	2871	lnc-CHMP4C-4:2	135
Noncanon	GE	HERVIP	3632	lnc-AASDHPPT-2:1	170
Noncanon	GE	HERVH	4736	lnc-CD177-3:1	7
Noncanon	GE	HERVH	1543	lnc-CISD2-4:1	54
Noncanon	GE	HERVH	1748	lnc-PAPD7-5:1	259
Noncanon	GE	HERVH	507	lnc-CRIM1-3:1	181
Noncanon	GE	HERVH	2044	lnc-PANK3-8:1	170
Noncanon	GE	HERVIP	4526	lnc-CDH2-4:1	153
Noncanon	GE	MER57	2626	lnc-SPAM1-6:3	232
Noncanon	GE	HERV30	1008	lnc-CHMP2B-2:8	187
Noncanon	GE	HERVH	3675	lnc-NTM-1:2	191
Noncanon	GE	HERV9	2297	lnc-NT5DC1-4:1	108
Noncanon	AB	HML3	4679	lnc-ZNF675-1:2	209
Noncanon	GE	HERV9	2297	lnc-NT5DC1-4:2	1
Noncanon	GE	HERVH	1182	lnc-ARHGEF26-6:1	8
Noncanon	GE	HERVH	3987	lnc-PCDH9-1:1	146
Noncanon	GE	HERV9	4027	lnc-SLITRK5-14:1	52
Noncanon	GE	HERVH	2899	lnc-TMEM55A-5:1	15
Noncanon	S	THE	606	lnc-RPIA-4:4	16
Noncanon	AB	HML6	4093	lnc-FOXG1-1:1	221
Noncanon	S	THE	606	lnc-RPIA-4:1	2
Noncanon	S	THE	606	lnc-RPIA-4:2	1
Noncanon	GE	HARLEQUIN	1013	lnc-CGGBP1-1:1	196
Noncanon	AB	HML5	2690	lnc-ANGPT2-13:1	185
Noncanon	GE	HERV9	3611	lnc-JRKL-2:1	169
Noncanon	GE	HERVH	1662	lnc-RBM46-3:1	193
Noncanon	GE	HERVW	4043	lnc-GPC6-1:1	230
Noncanon	GE	HERVE	4641	lnc-ZNF486-11:1	210
Noncanon	GE	MER66	3351	lnc-SORCS1-3:2	18
Noncanon	AB	HML1	1782	lnc-C5orf17-1:2	657
Noncanon	GE	HERVH	5591	lnc-NAP1L3-6:1	102
Noncanon	GE	HERV9	3726	lnc-RERGL-4:1	46
Noncanon	GE	HERVH	1574	lnc-TRAM1L1-3:1	282
Noncanon	GE	PRIMA41	1718	lnc-GPM6A-2:1	161
Noncanon	GE	HERVH	1182	lnc-DHX36-2:1	191
Noncanon	GE	HARLEQUIN	475	lnc-TRIB2-13:1	11
Noncanon	GE	MER57	478	lnc-NBAS-6:1	227
Noncanon	S	MLT	3458	lnc-ALX4-8:1	263
Noncanon	GE	MER41	3561	lnc-FAM181B-6:1	202
Noncanon	GE	HERVH	3675	lnc-NTM-2:1	39
Noncanon	S	MST	1696	lnc-DDX60-1:1	231
Noncanon	AB	HML3	2501	lnc-SUMF2-11:1	12
Noncanon	GE	HERVH	3389	lnc-OR52J3-1:1	60
Noncanon	GE	HERVADP	4035	lnc-GPC5-8:1	85
Noncanon	GE	HERVFC	597	lnc-SUCLG1-7:1	3
Noncanon	GE	HERVH	2044	lnc-PANK3-9:1	22
Noncanon	GE	HERVT	1157	lnc-PLSCR2-1:2	132
Noncanon	S	MLT	1390	lnc-GNPDA2-5:1	16
Noncanon	AB	HML1	1385	lnc-KCTD8-2:1	142
Noncanon	S	THE	4861	lnc-POTED-11:1	208
Noncanon	GE	HERVH	1693	lnc-DDX60-4:1	97
Noncanon	GE	HERVH	997	lnc-ROBO2-12:1	27
Noncanon	GE	HERVH	2899	lnc-RUNX1T1-5:1	23
Noncanon	GE	HERVH	1182	lnc-ARHGEF26-7:1	2
Noncanon	GE	HERVW	3443	lnc-LRRC4C-9:1	18
Noncanon	GE	HERVFC	597	lnc-DNAH6-3:1	14
Noncanon	GE	MER57	1579	lnc-NDST3-4:4	142
Noncanon	GE	HERVH	5924	lnc-FPGT-10:1	35
Noncanon	S	HERVL	1158	lnc-ZIC4-1:1	238
Noncanon	AB	HML3	2969	lnc-KHDRBS3-9:9	87
Noncanon	GE	MER57	1579	lnc-NDST3-9:2	66
Noncanon	GE	HERVFB	4633	lnc-ZNF93-1:2	300
Noncanon	GE	HERVW	1611	lnc-RP11-62N21.1.1-3:1	77
Noncanon	GE	HERVH	1186	lnc-PLCH1-5:1	87
Noncanon	AB	HML5	4657	lnc-ZNF429-2:1	155
Noncanon	GE	HERVH	4021	lnc-SLITRK6-13:4	197
Noncanon	GE	HERV9	2761	lnc-UNC5D-2:2	254
Noncanon	GE	HERVIP	2180	lnc-PHF3-4:1	357
Noncanon	S	HERVL	859	lnc-GRM7-7:1	296
Noncanon	S	HERVL	735	lnc-FIGN-1:1	143
Noncanon	GE	HERVH	483	lnc-FAM49A-2:1	124
Noncanon	AB	HML7	3456	lnc-ALX4-8:1	318
Noncanon	GE	HERVH	1035	lnc-OR5H15-1:2	166
Noncanon	AB	HML1	4640	lnc-ZNF682-3:1	247
Noncanon	AB	HML5	1619	lnc-RP11-62N21.1.1-8:1	129

## Sheet: Intron
HERV Sequence	HERV genus	HERV groups	HERV ID	Functional site/ AC_Intron	number of SNVs
Canon	GE	HERVH	1513	NR_125920	102
Canon	GE	HERVH	2623	NR_110183	119
Canon	S	HERVL	4189	NR_038355	172
Canon	GE	HERVH	2334	NM_001277185	166
Canon	GE	HERVH	2623	NR_110188	13
Canon	GE	HERVIP	1224	NM_024687	300
Canon	GE	HERVIP	4858	NR_026916	192
Canon	GE	MER50	583	NR_110288	120
Canon	GE	HERVADP	5921	NM_173808	250
Canon	GE	MER50	654	NM_001178037	286
Canon	GE	HERV9	3326	NM_000769	289
Canon	GE	HEPSI1	1227	NR_021485	236
Canon	GE	HERVH	3565	NR_120571	50
Canon	GE	HERVH	3979	NR_126409	138
Canon	GE	HERVH	1514	NM_001510	152
Canon	S	HERVL	3906	NM_173598	214
Canon	AB	HML2	6089	NR_002925	145
Canon	GE	HERVH	695	NM_018557	226
Canon	GE	HERVH	2325	NM_006073	153
Canon	GE	MER52	3564	NR_120571	323
Canon	GE	HERVH	582	NM_001282924	66
Noncanon	GE	HERVH48	5736	NM_001009613	126
Noncanon	S	MST	4780	NM_014218	142
Noncanon	GE	HERV1	1086	NM_014980	287
Noncanon	GE	HERV9	1216	NR_126405	184
Noncanon	GE	HERV9	1710	NM_001034845	220
Noncanon	GE	HERVH	2044	NM_001122679	13
Noncanon	GE	HERVH	2667	NM_014141	314
Noncanon	GE	HERVH	2668	NM_014141	249
Noncanon	GE	HERVH	1778	NM_004061	350
Noncanon	GE	HERVH	852	NM_014461	292
Noncanon	GE	HERVH	3731	NM_019844	167
Noncanon	GE	HERVH	2670	NM_014141	223
Noncanon	GE	HERV9	3980	NR_126409	116
Noncanon	GE	HERV9	2885	NM_173538	340
Noncanon	GE	HERV9	3422	NM_001252010	273
Noncanon	GE	HERVH	2324	NM_006073	173
Noncanon	S	HERVL	589	NM_004389	362
Noncanon	GE	HUERSP3	1774	NM_001291956	164
Noncanon	S	MST	4780	NR_110738	21
Noncanon	GE	HERVW	2177	NM_001292009	227
Noncanon	GE	HUERSP3	3468	NR_027044	306
Noncanon	GE	HERV9	3258	NM_033056	182
Noncanon	GE	HERVH	2852	NR_039986	156
Noncanon	GE	HERVH	3886	NM_152788	230
Noncanon	GE	HERV9	2624	NR_110188	128
Noncanon	GE	LTR38	2878	NM_173848	169
Noncanon	GE	PRIMA41	4243	NR_126392	152
Noncanon	GE	HERVH	2683	NM_033225	226
Noncanon	S	HERVL	806	NM_005235	205
Noncanon	GE	HERVH	4548	NM_002930	256
Noncanon	GE	HERVH	3203	NM_032812	183
Noncanon	S	HERVL	2006	NM_018904	276
Noncanon	AB	HML3	1500	NM_001145065	297
Noncanon	S	HERVL	2201	NM_014989	205
Noncanon	GE	HERVIP	2017	NR_109877	390
Noncanon	AB	HML6	4665	NM_001001411	132
Noncanon	GE	HARLEQUIN	1503	NM_001145065	160
Noncanon	GE	HERVH	1033	NM_001080448	272
Noncanon	S	HERVL	3027	NM_001004352	216
Noncanon	GE	HUERSP3	2886	NM_173538	416
Noncanon	GE	HUERSP3	1942	NR_046678	158
Noncanon	S	HERVL	2193	NM_001704	274
Noncanon	GE	HERVH	461	NM_001287444	215
Noncanon	AB	HML3	1773	NM_004934	309
Noncanon	GE	HERVH	2971	NR_125428	158
Noncanon	S	HERVL	4244	NR_126392	321

## Sheet: TFBS
HERV Sequence	HERV genus	HERV groups	HERV ID	Functional site/ TFBS	number of SNVs
Canon	GE	HERVH	1208	FOXA1	3
Canon	GE	HERVIP	3846	RAD21	21
Canon	GE	HERVH	5937	FOS	13
Canon	GE	HUERSP3	2211	SETDB1	1
Canon	GE	LTR46	3609	IRF1	6
Canon	GE	HUERSP3	1247	TAF7	4
Canon	GE	HERV9	6029	ZNF143	1
Canon	GE	MER52	1834	EBF1	1
Canon	GE	HUERSP3	2211	MAX	8
Canon	GE	HERVH	778	FOS	10
Canon	GE	MER52	3564	JUND	11
Canon	GE	HERVH	2565	POLR2A	21
Canon	GE	ERV1_ARTIODACT	4572	GATA2	10
Canon	GE	HERV3	2608	FOS	12
Canon	GE	HUERSP3	833	JUND	3
Canon	AB	HML5	3557	KAP1	19
Canon	GE	HERVIP	1011	SETDB1	3
Canon	GE	HERVT	4229	FOSL1	1
Canon	AB	HML5	3557	CEBPB	3
Canon	GE	HERV3	2608	IRF4	3
Canon	GE	HERVE	849	TFAP2A	4
Canon	GE	HEPSI2	897	RAD21	8
Canon	GE	HERVIP	2547	KAP1	2
Canon	GE	HUERSP3	3732	RAD21	12
Canon	GE	HERVADP	2666	ATF1	11
Canon	GE	HERVH	582	CHD1	41
Canon	GE	HERVH48	1334	CTCF	4
Canon	AB	HML8	2209	KAP1	4
Canon	GE	HERVIP	2547	RAD21	7
Canon	GE	HERVE	3723	EP300	11
Canon	GE	ERV1_ARTIODACT	4562	RAD21	9
Canon	GE	HERV9	1799	NFYB	4
Canon	GE	MER52	2161	RAD21	10
Canon	GE	HERVFRD	6139	EP300	4
Canon	GE	HERVFB	1209	RAD21	13
Canon	GE	HERVT	3253	STAT3	5
Canon	GE	HERVIP	593	EP300	1
Canon	GE	MER51	1603	MAFK	6
Canon	GE	MER52	999	FOS	3
Canon	GE	HUERSP3	1247	RAD21	1
Canon	GE	HERVH	2646	KAP1	9
Canon	GE	HERV3	2608	TAL1	2
Canon	GE	HERVIP	3442	ZNF143	10
Canon	GE	MER52	2161	CTCF	3
Canon	GE	HERVIP	2312	CEBPB	10
Canon	GE	HERVH	1758	CHD1	24
Canon	GE	MER51	1436	NANOG	2
Canon	GE	HERVW	460	CEBPB	4
Canon	AB	HML9	594	CTCF	15
Canon	GE	MER51	4529	FOS	16
Canon	AB	HML8	6122	TFAP2A	7
Canon	GE	LTR46	3609	TAL1	2
Canon	GE	HERVFB	1209	CTCF	1
Canon	GE	HERVE	1632	CTCF	5
Canon	GE	HERVT	3253	TCF7L2	2
Canon	GE	HERVFB	4023	POU5F1	1
Canon	S	HERVS	1046	CTCF	3
Canon	GE	HERV9	2169	PAX5	8
Canon	GE	HERV3	3431	POU5F1	3
Canon	GE	HUERSP3	2552	JUND	5
Canon	GE	HUERSP3	1247	SP1	1
Canon	GE	HERV9	1417	NFYB	26
Canon	AB	HML8	6122	TCF7L2	3
Canon	GE	HERVH	1208	MAFF	8
Canon	GE	HERV9	702	PAX5	5
Canon	GE	MER50	583	USF1	5
Canon	GE	HERV9	2169	CTCF	13
Canon	GE	HERVH	1594	TEAD4	1
Canon	S	HERVL	3984	FOXP2	2
Canon	GE	HERVH	2164	YY1	16
Canon	GE	HUERSP3	3732	MAX	1
Canon	GE	HERVFRD	6139	ZNF217	1
Canon	GE	HERVIP	3905	E2F4	4
Canon	GE	HERVADP	2666	CTCF	7
Canon	GE	HERVH	2645	EP300	11
Canon	GE	HERV3	1576	EP300	1
Canon	GE	HERV9	3224	NFYB	13
Canon	S	HERVL	767	JUND	7
Canon	GE	HERVH	586	NR2F2	3
Canon	GE	HERVH	1208	GATA3	8
Canon	S	HERVS	1046	FOXA1	6
Canon	GE	HERVH	585	EP300	7
Canon	GE	HERVH	2609	SP1	2
Canon	GE	HERV3	1576	SETDB1	2
Canon	AB	HML8	3857	POLR2A	6
Canon	GE	HERVH48	1334	RAD21	6
Canon	GE	HERVADP	3558	CTCF	4
Canon	GE	HERVH	1594	EP300	16
Canon	GE	HERVH	5938	TEAD4	7
Canon	GE	HERVADP	2666	RAD21	12
Canon	GE	HUERSP2	1159	CBX3	6
Canon	GE	HERVE	849	ZNF143	1
Canon	GE	HERVIP	2312	SRF	6
Canon	AB	HML5	3557	HNF4G	1
Canon	S	HERVL	848	FOXA1	4
Canon	GE	MER52	2310	CTCF	4
Canon	GE	MER51	4529	MAX	12
Canon	GE	HERVH	3672	TEAD4	11
Canon	GE	HERVIP	3913	SETDB1	7
Canon	GE	HUERSP3	521	KAP1	3
Canon	GE	HERVADP	2666	CEBPB	4
Canon	AB	HML9	594	CEBPB	8
Canon	GE	HERVIP	593	RAD21	8
Canon	GE	HERV3	1576	USF1	7
Canon	AB	HML9	594	RAD21	13
Canon	GE	HERVH	2263	CEBPB	12
Canon	GE	MER52	999	RAD21	5
Canon	GE	HERVIP	3770	PML	4
Canon	GE	HERV3	2608	NFIC	9
Canon	GE	HERVH	1220	MAFK	8
Canon	GE	HERVH48	1239	RAD21	16
Canon	GE	HERVADP	3558	RAD21	16
Canon	GE	HERVH48	1239	CTCF	1
Canon	GE	MER52	4400	SPI1	10
Canon	GE	HUERSP3	521	CTCF	1
Canon	GE	HUERSP3	1690	JUND	11
Canon	AB	HML8	3621	ESR1	14
Canon	GE	MER51	1436	TCF12	12
Canon	GE	HERV4	1950	NFYB	12
Canon	GE	HERVW	577	TBP	2
Canon	AB	HML8	3857	STAT3	10
Canon	GE	HERVH	1208	CEBPB	4
Canon	GE	HUERSP3	521	FOS	8
Canon	AB	HML8	3621	STAT3	2
Canon	GE	HERVH	4192	USF2	2
Canon	GE	HERVH	4379	CTCF	5
Canon	GE	HUERSP3	2552	MAZ	1
Canon	GE	MER51	4529	STAT3	1
Canon	GE	HERVIP	1224	RAD21	7
Canon	GE	HERV3	2608	RCOR1	1
Canon	GE	HERVH	1613	TEAD4	3
Canon	GE	HERVT	3253	RAD21	18
Canon	GE	HERVE	849	CTCF	12
Canon	AB	HML5	3557	HDAC2	2
Canon	GE	HERVFA	3231	TAL1	13
Canon	GE	HERV4	1950	SP1	4
Canon	AB	HML8	3857	CTCF	2
Canon	AB	HML8	1818	CEBPB	4
Canon	GE	HERV3	3431	MXI1	2
Canon	GE	HERVH	1036	HNF4G	1
Canon	GE	HERV3	2608	CEBPB	20
Canon	GE	HERVH	1036	HNF4A	10
Canon	GE	MER52	918	CTCF	3
Canon	AB	HML8	1818	FOS	11
Canon	GE	HERVIP	1011	CTCF	15
Canon	GE	HERVH	1246	CHD1	20
Canon	GE	HERVH	1154	FOSL2	5
Canon	GE	HERV3	2608	GATA2	3
Canon	GE	HERVFA	1928	KAP1	7
Canon	GE	HERVT	4229	E2F6	3
Canon	AB	HML8	2209	SETDB1	1
Canon	GE	HERV3	1576	YY1	1
Canon	GE	HERVADP	2666	GATA2	3
Canon	GE	HERVH	2000	NANOG	10
Canon	GE	HEPSI3	1428	GATA3	5
Canon	GE	HEPSI2	897	CTCF	7
Canon	GE	HERVE	1632	SPI1	11
Canon	GE	HERVT	4374	CTCF	2
Canon	GE	HERVH	1208	SMC3	1
Canon	GE	MER52	1834	RAD21	16
Canon	GE	HERVH	2334	CEBPB	14
Canon	GE	HUERSP3	1247	JUND	8
Canon	GE	HERVE	3915	RAD21	3
Canon	GE	MER50	6148	CTCF	8
Canon	GE	HERVIP	1011	RAD21	1
Canon	AB	HML8	6122	MYC	9
Canon	S	HERVS	3999	ESR1	8
Canon	GE	HERVH	2645	CBX3	4
Canon	GE	HERVIP	3770	STAT3	11
Canon	GE	HERVIP	593	RFX5	2
Canon	GE	HERVADP	2666	BHLHE40	4
Canon	GE	HERVIP	593	ZBTB33	1
Canon	AB	HML3	1593	KAP1	18
Canon	GE	HERVFRD	6139	RAD21	6
Canon	GE	HUERSP3	1247	KAP1	11
Canon	GE	HERVH	582	TAF1	4
Canon	GE	HERVH	582	TAF7	25
Canon	GE	HERVW	577	POLR2A	1
Canon	GE	HUERSP2	1159	KAP1	9
Canon	GE	HERVIP	1011	CBX3	4
Canon	GE	HERVT	3253	RUNX3	1
Canon	AB	HML8	2209	EP300	15
Canon	GE	HERVADP	2666	RCOR1	6
Canon	GE	HEPSI1	1621	RAD21	6
Canon	GE	HERVFA	1928	ZNF143	6
Canon	GE	HERVH	1246	TBP	12
Canon	GE	ERV1_ARTIODACT	4572	EP300	1
Canon	GE	HERVH	1246	TCF12	5
Canon	GE	HERVH	2646	CBX3	1
Canon	GE	HERVIP	3442	ATF1	9
Canon	GE	HERVH	586	CEBPB	3
Canon	GE	HUERSP2	1864	RAD21	8
Canon	GE	HUERSP3	1247	USF1	3
Canon	GE	HERVH	1202	FOXA1	6
Canon	GE	HUERSP3	2552	ZNF143	9
Canon	GE	HERV9	6029	FOSL1	4
Canon	GE	HUERSP3	2211	KAP1	13
Canon	S	HERVL	2605	STAT3	12
Canon	GE	HERVH	1056	FOXA1	5
Canon	AB	HML8	6122	HNF4A	4
Canon	GE	HERVW	577	MYC	5
Canon	GE	HERVIP	2547	CTCF	4
Canon	GE	HERV4	1950	RELA	1
Canon	GE	HERVH	1514	TAF1	2
Canon	GE	HERVH	1514	TAF7	8
Canon	GE	HUERSP3	1690	CTCF	5
Canon	GE	HERVE	849	RAD21	13
Canon	AB	HML5	3557	FOXA2	1
Canon	AB	HML5	3557	FOXA1	3
Canon	AB	HML2	6089	SPI1	4
Canon	GE	HERVH	1208	CTCF	5
Canon	GE	HERVIP	593	MYC	3
Canon	AB	HML8	6122	CEBPB	1
Canon	GE	HERVE	3723	RAD21	4
Canon	GE	HERV3	1576	KAP1	17
Canon	S	HERVL	848	GATA3	6
Canon	GE	HUERSP3	4013	TFAP2C	14
Canon	GE	HERVIP	3770	FOXA1	3
Canon	GE	HERV9	3916	MAFK	7
Canon	GE	MER50	583	KAP1	3
Canon	GE	HERVH	3969	POLR2A	35
Canon	GE	MER52	2310	SPI1	5
Canon	GE	HERVW	577	YY1	14
Canon	GE	HUERSP3	4013	RAD21	20
Canon	GE	HERVW	3967	MAFK	8
Canon	GE	HUERSP3	1247	MAX	1
Canon	GE	HERV3	2608	CTCF	15
Canon	GE	HUERSP3	833	YY1	15
Canon	S	HERVL	3984	FOS	1
Canon	GE	HERVE	849	RELA	5
Canon	GE	HERVH48	4644	CTCF	5
Canon	GE	HUERSP3	1247	CEBPB	8
Canon	GE	HERVE	3723	CTCF	3
Canon	GE	HERVIP	3770	GATA2	5
Canon	AB	HML8	6122	STAT3	2
Canon	AB	HML3	1523	GATA2	13
Canon	GE	HERVH	1225	EP300	11
Canon	GE	HERVH	1246	TAF7	5
Canon	GE	HERVH	1246	TAF1	2
Canon	GE	HERVIP	2312	CTCF	10
Canon	GE	HERVH	4192	USF1	6
Canon	GE	HERV3	3431	TFAP2A	3
Canon	GE	HERVH	1513	SIN3A	12
Canon	GE	HERVW	3967	POLR2A	1
Canon	GE	HERV3	3431	FOS	1
Canon	GE	MER52	1834	EP300	14
Canon	GE	HERVIP	593	CHD2	2
Canon	GE	HERVW	3967	YY1	10
Canon	GE	HUERSP3	521	CEBPB	3
Canon	AB	HML8	2209	FOS	6
Canon	GE	HERV3	1576	POU5F1	6
Canon	GE	HERVFB	2042	CTCF	10
Canon	GE	HERVIP	1224	CEBPB	15
Canon	GE	HERVH	582	NANOG	2
Canon	GE	LTR46	3609	EP300	8
Canon	S	HERVL	2212	JUND	10
Canon	GE	HERV3	3431	RAD21	2
Canon	S	HERVL	3676	RAD21	1
Canon	GE	HERVIP	593	CTCF	11
Canon	GE	HERVIP	593	BATF	2
Canon	GE	HUERSP2	1159	MYC	14
Canon	S	HERVS	1046	RAD21	11
Canon	GE	HERV3	2608	TEAD4	1
Canon	GE	HUERSP3	833	JUN	3
Canon	GE	HERVT	4229	JUNB	2
Canon	GE	HERVIP	3905	RAD21	9
Canon	GE	HERVH	1758	TAF1	14
Canon	GE	HERVFA	1928	SETDB1	8
Canon	GE	HUERSP3	1247	SPI1	8
Canon	GE	HERVIP	3442	KAP1	7
Canon	GE	HERVH	4379	RAD21	7
Canon	GE	ERV1_ARTIODACT	4562	CTCF	1
Canon	AB	HML8	6122	CTCF	7
Canon	GE	HUERSP3	521	RAD21	7
Canon	AB	HML8	3621	EP300	1
Canon	AB	HML8	1818	GATA2	2
Canon	GE	HERV3	1576	FOS	15
Canon	GE	HERVT	2248	MAFK	6
Canon	GE	HERVH	2937	POLR2A	4
Canon	AB	HML2	6089	REST	9
Canon	S	HERVS	1046	FOS	4
Canon	GE	HUERSP3	1247	POU5F1	1
Canon	GE	MER51	4529	KAP1	30
Canon	AB	HML3	2498	GATA3	1
Canon	GE	MER41	4467	PAX5	14
Canon	GE	HERV9	3269	EBF1	10
Canon	GE	HUERSP2	1159	SETDB1	7
Canon	S	HERVL	3984	KAP1	7
Canon	GE	HERVIP	3770	FOS	1
Canon	AB	HML8	6122	EP300	11
Canon	GE	HERVADP	2666	TAL1	12
Canon	GE	HERVH	971	USF1	4
Canon	AB	HML8	6122	FOS	7
Canon	GE	HUERSP3	1690	RAD21	15
Canon	GE	HUERSP3	4013	SMC3	1
Canon	GE	HERV3	2608	SPI1	5
Canon	S	HERVL	3676	CTCF	7
Canon	GE	HERVT	4229	MAX	2
Canon	GE	HERVIP	1553	CTCF	14
Canon	GE	HERV3	2608	PML	2
Canon	GE	HERVFRD	6139	GATA2	8
Canon	GE	HUERSP3	4013	FOXA1	15
Canon	S	HERVL	667	STAT3	1
Canon	GE	HERVIP	3913	RAD21	7
Canon	GE	HERV3	2608	NR2F2	4
Canon	GE	HERVFA	3231	NR2F2	6
Canon	GE	MER65	1024	FOS	10
Canon	GE	HUERSP3	4013	CTCF	17
Canon	GE	HERVIP	593	FOS	7
Canon	GE	HUERSP3	2552	CEBPB	12
Canon	GE	HERVIP	1011	KAP1	14
Canon	GE	HUERSP3	1247	CTCF	1
Canon	GE	HEPSI3	1428	NFIC	3
Canon	GE	HERVT	3253	ZNF143	1
Canon	GE	HERVIP	3913	CBX3	11
Canon	GE	HERV4	1950	POU2F2	9
Canon	GE	HERVFB	1209	MAFK	12
Canon	GE	HERVE	3915	CTCF	1
Canon	AB	HML8	3621	MYC	1
Canon	GE	HERVADP	2666	JUN	2
Canon	GE	HERVT	4374	RAD21	8
Canon	GE	HERVW	577	MAX	4
Canon	GE	HERVH	2334	JUND	6
Canon	AB	HML8	1818	STAT3	1
Canon	GE	HERV9	1954	NFYB	9
Canon	GE	HEPSI2	897	GATA2	3
Canon	GE	HEPSI2	897	GATA3	5
Canon	GE	HUERSP2	1197	REST	12
Canon	AB	HML3	2498	EP300	1
Canon	GE	HERVH48	4644	RAD21	8
Canon	GE	HERVW	577	CEBPB	2
Canon	AB	HML5	3557	SETDB1	5
Canon	GE	HERVH	4204	FOXA1	6
Canon	GE	HERVADP	2666	JUNB	2
Canon	GE	HERVADP	2666	JUND	3
Canon	GE	HERVH	1208	RAD21	3
Canon	GE	HERVFRD	1388	GATA3	9
Canon	GE	HERVH	4039	POLR2A	29
Canon	GE	HERV3	2608	CBX3	1
Canon	GE	HERVH	1717	GATA2	10
Canon	GE	MER52	999	CTCF	22
Canon	AB	HML1	2644	ZNF143	12
Canon	AB	HML8	6122	CBX3	4
Canon	GE	HERV3	3431	FOSL2	1
Canon	GE	HERVIP	3913	CTCF	3
Canon	GE	HERVIP	4551	SETDB1	16
Canon	GE	MER50	2934	KAP1	27
Canon	GE	HERV3	2608	ATF2	6
Canon	GE	HERVT	3253	CTCF	13
Canon	GE	HERVH	1758	POLR2A	22
Canon	GE	HUERSP3	4013	FOS	11
Canon	GE	HERVE	3723	CEBPB	5
Canon	GE	HERVH	1246	POLR2A	15
Canon	AB	HML8	6122	FOSL2	1
Canon	GE	HEPSI	1356	SPI1	13
Canon	GE	HERVADP	2666	PML	1
Canon	GE	HERVH	2314	RAD21	9
Canon	GE	HEPSI1	1621	TCF12	11
Canon	AB	HML3	4659	GATA2	1
Canon	AB	HML3	4659	GATA3	15
Canon	GE	MER51	4529	SETDB1	2
Canon	AB	HML8	3857	EP300	1
Canon	GE	HERVH	1514	POLR2A	8
Canon	GE	HEPSI3	1428	EP300	12
Canon	GE	HERVH	4379	MAFK	10
Canon	GE	HERVH	3969	TAF1	1
Canon	GE	HERVH	1154	TEAD4	5
Canon	GE	HERVT	4229	CTCF	3
Canon	GE	HERV9	1791	PAX5	11
Canon	GE	HERVH	1036	NANOG	1
Canon	GE	HERVFRD	6139	CTCF	19
Canon	GE	MER52	3564	FOXP2	5
Canon	AB	HML8	2209	RAD21	11
Canon	GE	HERVT	4229	SP1	4
Canon	AB	HML8	3621	FOS	14
Canon	GE	HERVH	4192	CEBPB	2
Canon	GE	HERVIP	593	BCL11A	2
Canon	GE	HERVH	1613	TAL1	14
Canon	GE	HERVADP	2666	MAFK	1
Canon	GE	HERVIP	1553	RAD21	9
Canon	GE	HERVH	2646	SETDB1	22
Canon	AB	HML8	3621	RAD21	6
Canon	GE	HERV4	1950	REST	9
Canon	S	HERVL	3984	CEBPB	2
Canon	AB	HML8	1450	HNF4A	4
Canon	GE	HEPSI3	1428	RUNX3	6
Canon	GE	HUERSP2	1197	RUNX3	18
Canon	AB	HML8	1450	HNF4G	4
Canon	GE	HERV9	3420	ZNF143	11
Canon	GE	HERV3	1576	STAT3	1
Canon	GE	HERV3	3431	CTCF	3
Canon	GE	HERVH	2334	TEAD4	2
Canon	GE	HERV9	1909	NFYB	10
Canon	GE	HERVFRD	6139	FOSL2	12
Canon	GE	HERV3	2608	EP300	2
Canon	GE	HERVH	1513	POLR2A	3
Canon	GE	LTR46	3609	SPI1	7
Canon	GE	HERV4	1950	YY1	1
Canon	GE	HERVT	4639	SP4	3
Canon	GE	HERVH	1613	FOXA1	4
Canon	GE	HERVH	1212	ZNF143	11
Canon	GE	HUERSP3	1247	JUN	5
Canon	AB	HML3	1593	SETDB1	1
Canon	GE	HERVH	2645	KAP1	20
Canon	GE	HEPSI1	1621	SPI1	1
Canon	GE	HERV9	2496	NFYB	12
Canon	GE	HERVT	4229	FOS	1
Canon	GE	HERVH	1246	SIN3A	3
Canon	GE	HERV9	3916	ZNF143	9
Canon	GE	HERVH48	587	YY1	6
Canon	GE	HERV3	2608	RAD21	16
Canon	GE	HERV9	2169	NFYB	13
Canon	GE	HEPSI1	1621	CEBPB	10
Canon	GE	HERVT	2248	TCF12	1
Canon	GE	HERVIP	3770	NR2F2	1
Canon	GE	MER50	2934	ZNF143	8
Canon	GE	HERV3	2608	TCF12	1
Canon	GE	HERV3	2608	E2F4	1
Canon	GE	HERVADP	2666	UBTF	2
Canon	AB	HML1	2644	CEBPB	12
Canon	GE	ERV1_ARTIODACT	4572	STAT3	7
Canon	GE	HERVH	5937	MAFK	9
Canon	GE	HERVH	5937	MAFF	2
Canon	GE	HERV9	1799	FOSL1	4
Canon	AB	HML8	1818	EP300	2
Canon	GE	MER51	4529	TFAP2C	29
Canon	GE	HEPSI2	897	MAFK	15
Canon	GE	HERVH48	4644	MAFK	6
Canon	GE	HERVT	3253	YY1	3
Canon	AB	HML1	2644	SETDB1	9
Canon	GE	HERVFRD	6139	JUND	1
Canon	GE	HERVIP	3770	TAL1	4
Canon	GE	HERVT	4639	TCF12	7
Canon	S	HERVL	775	CEBPB	1
Canon	GE	HERV3	2608	HDAC2	10
Canon	GE	PABL	4034	CTCF	9
Canon	AB	HML8	1450	EP300	1
Canon	AB	HML8	3621	GATA3	14
Canon	AB	HML8	3621	GATA2	9
Canon	GE	HERVIP	2312	RUNX3	16
Canon	GE	HERVIP	3770	EP300	5
Canon	GE	HERV3	1576	ZNF143	2
Canon	GE	MER50	654	FOS	13
Canon	GE	MER50	583	SETDB1	13
Canon	GE	MER50	2934	CTCF	10
Canon	GE	HEPSI3	1428	ESR1	2
Canon	GE	HERV3	3431	USF1	1
Canon	AB	HML8	1450	GATA1	3
Canon	GE	HERVIP	1011	TRIM28	8
Canon	GE	HERVH	586	TAL1	3
Canon	GE	HERVIP	5986	SPI1	8
Canon	GE	HERVIP	1011	TEAD4	10
Canon	GE	HUERSP3	521	SETDB1	83
Canon	AB	HML1	2644	CBX3	5
Canon	GE	HERVIP	3770	GATA1	2
Canon	GE	HUERSP3	521	ZNF143	6
Canon	GE	MER52	999	SMC3	1
Canon	AB	HML8	4642	FOS	10
Canon	GE	HERVH	1208	ZNF217	14
Canon	GE	MER52	918	RAD21	17
Canon	GE	HERVIP	3442	CBX3	2
Canon	GE	HERVIP	1553	SRF	14
Canon	GE	HUERSP3	1247	ZNF143	7
Canon	AB	HML8	6122	RCOR1	1
Canon	GE	HEPSI3	1428	FOXA1	5
Canon	S	HERVL	4116	MAFK	9
Canon	GE	HERV4	1950	ATF2	11
Canon	GE	HERVIP	4858	CTCF	10
Canon	S	HERVL	848	MAFF	7
Canon	GE	MER52	1834	CTCF	18
Canon	GE	MER50	6148	FOXA1	3
Canon	S	HERVL	848	MAFK	2
Canon	GE	HERVH	2609	TEAD4	8
Canon	GE	MER65	1024	ESR1	5
Canon	GE	HERVW	577	PML	2
Canon	GE	HERVE	3915	USF1	12
Canon	GE	HUERSP3	3732	CTCF	6
Canon	AB	HML5	3557	TCF7L2	2
Canon	GE	HERVIP	2547	SETDB1	6
Canon	GE	HUERSP2	1864	CTCF	6
Canon	AB	HML1	2644	KAP1	11
Canon	GE	HERVIP	593	JUN	1
Canon	AB	HML8	1450	FOXA1	8
Canon	GE	HUERSP3	2552	SMC3	2
Canon	GE	HERVADP	782	CEBPB	7
Canon	GE	HERVT	4229	FOXA1	2
Canon	GE	HERVH48	1239	MAZ	1
Canon	GE	HERV4	1950	POU5F1	7
Canon	GE	HERVH	3903	EP300	6
Canon	GE	HERVT	4639	MAFK	2
Canon	GE	HERV4	1950	RUNX3	2
Canon	GE	HERV3	2608	BCL11A	4
Canon	GE	MER50	6148	RAD21	3
Canon	GE	HERVIP	3770	TEAD4	2
Canon	GE	HERVH	582	TBP	2
Canon	GE	HERVH48	587	RAD21	8
Canon	GE	HUERSP3	1247	RBBP5	3
Canon	GE	HERVW	460	YY1	7
Canon	GE	HERVIP	4551	KAP1	14
Canon	GE	HERVH	2646	EP300	8
Noncanon	GE	MER83	1508	MAFK	7
Noncanon	AB	HML1	4640	FOXA1	10
Noncanon	AB	HML2	5820	ZNF143	15
Noncanon	GE	HERVH	2044	CEBPB	4
Noncanon	S	HERVS	4036	CEBPB	12
Noncanon	GE	HERVH	1605	RELA	3
Noncanon	S	THE	606	SPI1	2
Noncanon	GE	HERVIP	3387	KAP1	9
Noncanon	GE	HERV30	2924	CTCF	7
Noncanon	GE	HERVE	4641	SPI1	11
Noncanon	GE	HERVH	4548	EP300	6
Noncanon	GE	HERVH	1599	TEAD4	17
Noncanon	GE	HERVH	1186	TAL1	9
Noncanon	GE	HERVH	507	MAFK	1
Noncanon	GE	HERVFC	597	BACH1	10
Noncanon	GE	MER57	781	FOS	3
Noncanon	GE	HERV9	2251	ELF1	4
Noncanon	AB	HML3	2472	SPI1	5
Noncanon	GE	HARLEQUIN	1575	NFIC	1
Noncanon	GE	HERV9	2170	CTCF	6
Noncanon	GE	HERV1	915	GATA3	1
Noncanon	GE	MER66	4851	CTCF	3
Noncanon	GE	HERVH	4012	MBD4	1
Noncanon	GE	HUERSP3	1680	KAP1	37
Noncanon	GE	HUERSP3	1680	GATA1	3
Noncanon	GE	HARLEQUIN	6255	CBX3	17
Noncanon	AB	HML8	4683	SMC3	9
Noncanon	GE	HERVIP	2180	KAP1	38
Noncanon	GE	HUERSP2	3992	IRF1	10
Noncanon	GE	MER34	2836	POLR2A	1
Noncanon	AB	HML6	2118	TBP	1
Noncanon	GE	HERV9	2240	KAP1	31
Noncanon	AB	HML5	2140	POU5F1	1
Noncanon	GE	HERVH	2875	FOS	19
Noncanon	GE	HERVH	2668	ATF2	9
Noncanon	AB	HML5	1619	EP300	13
Noncanon	GE	HERV9	1770	FAM48A	5
Noncanon	GE	HERVH	2670	NFIC	2
Noncanon	GE	HUERSP3	3615	ZNF274	1
Noncanon	GE	HERVE	4466	RAD21	13
Noncanon	AB	HML7	1025	ARID3A	1
Noncanon	GE	HERVH	2670	IRF4	2
Noncanon	GE	MER4	1550	RAD21	3
Noncanon	GE	MER66	3351	EBF1	10
Noncanon	GE	PRIMA41	1269	SPI1	10
Noncanon	AB	HML3	1844	ZNF143	9
Noncanon	GE	HERVH	4012	GATA3	1
Noncanon	GE	HERV9	3978	ELK4	19
Noncanon	S	THE	4231	CTCF	2
Noncanon	S	HERVS	4036	KAP1	6
Noncanon	GE	HERV9	3422	MAFF	7
Noncanon	GE	HERV9	657	PAX5	18
Noncanon	GE	HERV9	1842	EP300	2
Noncanon	AB	HML3	1832	MAFK	6
Noncanon	GE	HERVFB	2902	GATA3	9
Noncanon	GE	LTR25	4126	MAFK	4
Noncanon	GE	HERVFB	4633	TAL1	1
Noncanon	GE	HERVH	1149	GATA3	8
Noncanon	AB	HML7	1025	FOXA2	3
Noncanon	GE	HERV9	1438	NFYB	13
Noncanon	GE	HERV9	1783	SPI1	6
Noncanon	AB	HML5	2140	POLR2A	4
Noncanon	GE	HERVH	693	CEBPB	2
Noncanon	AB	HML6	2118	SPI1	23
Noncanon	AB	HML5	4657	E2F6	1
Noncanon	GE	HERV9	996	CTCF	9
Noncanon	GE	HERV9	734	MAFK	5
Noncanon	GE	HERV9	1206	YY1	1
Noncanon	GE	HERVH	3423	MAFF	6
Noncanon	GE	HARLEQUIN	1013	ZNF143	3
Noncanon	GE	PRIMA41	1718	FOXA1	2
Noncanon	GE	PRIMA41	1924	CTCF	3
Noncanon	AB	HML5	4657	MAX	1
Noncanon	GE	HERVH	2852	REST	12
Noncanon	GE	HERVH	2044	MYC	2
Noncanon	GE	HERVH	3423	MAFK	1
Noncanon	GE	HERVH	2670	RELA	6
Noncanon	GE	HERV9	1371	CTCF	1
Noncanon	GE	HUERSP3	1680	BHLHE40	3
Noncanon	GE	HERV4	2932	REST	19
Noncanon	AB	HML6	2118	ATF1	3
Noncanon	S	THE	606	POU2F2	11
Noncanon	GE	HERVE	4641	RAD21	5
Noncanon	AB	HML6	4093	E2F1	12
Noncanon	S	MST	1696	SMC3	1
Noncanon	GE	MER57	478	TBP	19
Noncanon	GE	MER57	781	EP300	3
Noncanon	GE	HUERSP3	3615	PML	2
Noncanon	GE	HUERSP3	1680	SMARCA4	1
Noncanon	GE	HARLEQUIN	475	PAX5	14
Noncanon	S	HERVL	859	EP300	11
Noncanon	AB	HML8	1429	STAT3	1
Noncanon	GE	HERVH	2670	RUNX3	2
Noncanon	AB	HML8	1429	TCF7L2	3
Noncanon	GE	HERVIP	4735	RAD21	14
Noncanon	GE	HERVW	3443	YY1	11
Noncanon	GE	HERV4	2873	NANOG	3
Noncanon	AB	HML6	5988	MYC	4
Noncanon	GE	HERVH	3675	TBP	10
Noncanon	AB	HML6	5988	REST	11
Noncanon	GE	HUERSP2	3992	CTCF	5
Noncanon	GE	RHERVI	1047	CEBPB	2
Noncanon	GE	MER57	781	JUN	1
Noncanon	GE	HERVFB	2902	TCF7L2	18
Noncanon	GE	HUERSP2	3992	FOXA1	8
Noncanon	GE	HERVW	1200	MAFF	10
Noncanon	AB	HML3	1532	SETDB1	16
Noncanon	GE	HERVIP	3328	TEAD4	12
Noncanon	GE	HERV9	1823	MAFF	7
Noncanon	GE	HERVIP	3328	CHD1	1
Noncanon	GE	HERV9	1823	MAFK	1
Noncanon	GE	HERVH	5924	TEAD4	19
Noncanon	GE	HERVFC	3392	FOXA1	6
Noncanon	GE	PRIMA41	2471	GATA3	2
Noncanon	AB	HML5	4657	ARID3A	2
Noncanon	GE	HERVH	2010	FOXA1	3
Noncanon	GE	HERVH	2262	POLR2A	101
Noncanon	GE	HERVH	2856	POLR2A	37
Noncanon	AB	HML7	3456	CTCF	3
Noncanon	AB	HML7	3456	RAD21	6
Noncanon	GE	HUERSP3	1675	ZNF143	3
Noncanon	GE	HERVH	3389	POLR2A	7
Noncanon	GE	HERVH	1004	FOS	9
Noncanon	AB	HML5	4657	GATA2	1
Noncanon	S	THE	4734	CHD2	12
Noncanon	GE	HARLEQUIN	1575	RELA	2
Noncanon	AB	HML5	2140	TCF7L2	1
Noncanon	GE	HUERSP3	3615	ATF3	4
Noncanon	GE	PRIMA41	1269	KAP1	23
Noncanon	GE	HUERSP3	3615	ATF1	1
Noncanon	GE	HERV9	2815	PAX5	15
Noncanon	GE	HERVADP	4035	STAT2	4
Noncanon	GE	HUERSP3	1680	HMGN3	6
Noncanon	GE	HERVADP	4035	STAT1	5
Noncanon	GE	HERVH	4121	GATA3	12
Noncanon	GE	HUERSP3	1675	FOXA1	2
Noncanon	GE	HERVH	2899	CEBPB	8
Noncanon	GE	HUERSP3	1680	GATA2	2
Noncanon	GE	HERVIP	4526	EBF1	8
Noncanon	GE	HERVH	2899	STAT3	11
Noncanon	GE	LTR25	4126	MAFF	2
Noncanon	GE	PRIMA41	1718	GATA3	4
Noncanon	GE	HERVH	2667	POLR2A	13
Noncanon	AB	HML5	4657	CEBPB	2
Noncanon	S	THE	4734	MAX	1
Noncanon	AB	HML1	1385	CTCF	2
Noncanon	AB	HML6	4093	RAD21	15
Noncanon	AB	HML5	2140	PML	1
Noncanon	GE	HUERSP3	1435	RAD21	11
Noncanon	GE	HERVH	3389	EP300	2
Noncanon	GE	HERV9	2433	NFYB	13
Noncanon	GE	HERVIP	2812	MAFF	15
Noncanon	AB	HML2	2976	RAD21	2
Noncanon	GE	HARLEQUIN	1013	FOS	4
Noncanon	GE	HERVIP	3387	CEBPB	4
Noncanon	AB	HML2	5820	CTCF	3
Noncanon	AB	HML2	1793	CTCF	3
Noncanon	AB	HML5	4657	GATA1	5
Noncanon	S	HERVL	4244	FOXA1	4
Noncanon	GE	HERV9	1770	EP300	3
Noncanon	GE	HERVH	1366	EP300	13
Noncanon	AB	HML3	4679	STAT3	5
Noncanon	GE	HUERSP3	1675	MAX	10
Noncanon	S	THE	4734	TFAP2A	1
Noncanon	GE	MER66	3351	MAFK	8
Noncanon	GE	HERVH	1997	CEBPB	7
Noncanon	GE	HUERSP3	1680	GABPA	2
Noncanon	GE	HERVH	1186	EP300	2
Noncanon	GE	HERVH	1366	POLR2A	2
Noncanon	AB	HML5	4680	NR3C1	10
Noncanon	GE	HARLEQUIN	475	BATF	10
Noncanon	AB	HML5	2140	GATA2	1
Noncanon	GE	HUERSP3	1680	REST	1
Noncanon	GE	HERV9	3611	MAFK	1
Noncanon	GE	LTR25	4126	CTCF	7
Noncanon	AB	HML6	4093	CEBPB	2
Noncanon	AB	HML5	4657	EP300	7
Noncanon	GE	HERV9	2825	MAFF	5
Noncanon	AB	HML9	2674	FOS	3
Noncanon	AB	HML9	2674	GATA2	10
Noncanon	GE	HARLEQUIN	2823	FOS	8
Noncanon	GE	LTR25	4126	ZNF143	6
Noncanon	GE	HERV9	2181	NFYB	1
Noncanon	AB	HML8	1429	ESR1	2
Noncanon	GE	HERVH	2044	FOS	1
Noncanon	S	THE	606	TCF3	1
Noncanon	GE	HERVT	4676	JUND	5
Noncanon	GE	HERVH	1505	POLR2A	9
Noncanon	GE	HERVH	2856	CHD1	23
Noncanon	GE	HERVH	1506	MAFK	8
Noncanon	AB	HML8	1429	GATA3	1
Noncanon	GE	HERVH	1693	TEAD4	5
Noncanon	GE	HERVH	1506	MAFF	2
Noncanon	GE	HERVH	805	FOXP2	9
Noncanon	GE	HERV9	2433	ZNF143	3
Noncanon	AB	HML6	2675	GATA2	21
Noncanon	GE	HERV9	1438	FOXA2	8
Noncanon	GE	HERV9	1842	MAFK	9
Noncanon	GE	HERVH	2667	JUND	6
Noncanon	GE	HUERSP2	2184	MAFK	4
Noncanon	GE	HERV9	3616	NFYB	12
Noncanon	GE	MER52	4869	JUND	6
Noncanon	GE	HERVH	1366	FOS	1
Noncanon	GE	HERVIP	3387	FOS	1
Noncanon	GE	HUERSP3	1680	CCNT2	1
Noncanon	GE	MER34	2836	CEBPB	1
Noncanon	AB	HML3	3966	MAFK	10
Noncanon	GE	HERVT	669	EP300	2
Noncanon	AB	HML3	886	GATA3	1
Noncanon	AB	HML5	2140	ARID3A	1
Noncanon	S	MST	1696	RAD21	1
Noncanon	GE	HARLEQUIN	475	NFIC	11
Noncanon	GE	HERVH	3987	FOXA1	15
Noncanon	GE	HERVH	3987	BATF	1
Noncanon	S	HERVL	2495	GATA2	2
Noncanon	GE	HERV9	5978	MAFF	4
Noncanon	AB	HML5	4657	CTCF	1
Noncanon	GE	HERVW	2177	CTCF	3
Noncanon	AB	HML5	4657	POLR2A	2
Noncanon	GE	HERVH	2670	BATF	4
Noncanon	AB	HML8	4683	FOXA1	5
Noncanon	GE	HERVFC	597	MAFF	1
Noncanon	GE	PRIMA41	4193	MAFK	14
Noncanon	GE	MER4	1598	SETDB1	17
Noncanon	GE	HERVFC	597	MAFK	3
Noncanon	GE	HUERSP3	766	MEF2A	2
Noncanon	GE	MER57	781	FOXA1	6
Noncanon	GE	HERV9	1823	NFYB	11
Noncanon	GE	HERVH	2262	TEAD4	8
Noncanon	AB	HML2	5820	CBX3	4
Noncanon	GE	HERVH	1605	EBF1	1
Noncanon	GE	HERVH	2044	FOSL2	3
Noncanon	GE	HERVH	3675	TAF1	7
Noncanon	AB	HML5	2140	GATA3	2
Noncanon	GE	HERVH	3675	TAF7	1
Noncanon	AB	HML5	4657	JUN	5
Noncanon	GE	HUERSP3	1675	REST	4
Noncanon	AB	HML6	1785	GATA3	2
Noncanon	GE	HERVH	852	EBF1	8
Noncanon	GE	PRIMA41	1924	EP300	10
Noncanon	GE	HERVH	3731	NR3C1	2
Noncanon	GE	HUERSP3	1680	E2F6	1
Noncanon	GE	HUERSP3	3615	CTCF	6
Noncanon	GE	HUERSP3	1675	KAP1	7
Noncanon	S	THE	4734	KAP1	2
Noncanon	GE	HERV9	2297	FOS	1
Noncanon	GE	HUERSP3	1680	BCL3	1
Noncanon	AB	HML3	4679	GATA3	11
Noncanon	GE	HUERSP3	2886	GATA2	12
Noncanon	GE	MER4	1598	KAP1	3
Noncanon	AB	HML3	1223	MAFK	13
Noncanon	AB	HML5	1619	FOXA2	3
Noncanon	GE	HERV9	1196	CTCF	2
Noncanon	GE	HERVH	4736	EP300	6
Noncanon	GE	HERVH	3987	EBF1	2
Noncanon	AB	HML3	1716	FOXA1	9
Noncanon	GE	HUERSP3	1680	HDAC2	3
Noncanon	AB	HML5	4657	ZNF143	5
Noncanon	AB	HML8	4683	RAD21	1
Noncanon	GE	HERVH	2668	YY1	4
Noncanon	GE	HUERSP3	1680	HDAC1	7
Noncanon	GE	HERV9	2903	SPI1	8
Noncanon	GE	HUERSP3	3470	MAX	1
Noncanon	AB	HML7	1025	FOSL2	6
Noncanon	GE	HERV9	3726	STAT1	25
Noncanon	GE	HARLEQUIN	6255	IRF1	9
Noncanon	GE	RHERVI	1047	CTCF	6
Noncanon	S	THE	4734	MAFF	5
Noncanon	GE	HERVH	1543	POLR2A	35
Noncanon	GE	HERVH	3256	CEBPB	6
Noncanon	GE	HUERSP3	2094	MAFF	10
Noncanon	GE	HERVH	3987	MAFF	1
Noncanon	GE	HUERSP3	1435	CTCF	9
Noncanon	GE	HERV9	1783	PAX5	5
Noncanon	S	HERVL	589	CEBPB	12
Noncanon	GE	HERV1	915	TEAD4	7
Noncanon	GE	RHERVI	1047	RAD21	6
Noncanon	AB	HML6	4093	CTCF	6
Noncanon	GE	HUERSP3	3615	TEAD4	4
Noncanon	AB	HML5	2689	CTCF	18
Noncanon	GE	HERV9	6146	ZNF143	7
Noncanon	AB	HML5	4657	TEAD4	1
Noncanon	GE	HERVH	777	JUND	3
Noncanon	GE	HERVH	2670	BCL11A	4
Noncanon	GE	HERV9	1206	IKZF1	3
Noncanon	GE	HUERSP3	1680	MYC	1
Noncanon	GE	HERV4	2873	SPI1	14
Noncanon	GE	HERVH	4012	TEAD4	5
Noncanon	AB	HML5	4680	GATA3	18
Noncanon	GE	HUERSP3	1774	REST	15
Noncanon	GE	HUERSP3	3615	E2F6	9
Noncanon	AB	HML5	4680	STAT3	2
Noncanon	GE	HERVIP	3387	POLR2A	10
Noncanon	GE	HERVFB	2902	JUN	11
Noncanon	GE	HUERSP3	3615	JUNB	3
Noncanon	GE	HERVIP	3632	CTCF	3
Noncanon	GE	HUERSP3	3615	NR2F2	5
Noncanon	GE	HUERSP3	3615	JUND	1
Noncanon	S	HERVL	4096	YY1	4
Noncanon	AB	HML3	1903	GATA3	4
Noncanon	AB	HML3	1903	GATA2	13
Noncanon	GE	HERVFB	4633	POLR2A	4
Noncanon	GE	PRIMA41	3461	GATA3	1
Noncanon	GE	HERVIP	3632	SETDB1	30
Noncanon	GE	HUERSP2	1615	MAFK	10
Noncanon	GE	HERVIP	2847	CTCF	1
Noncanon	GE	MER34	2836	JUN	2
Noncanon	GE	HERVH	2668	NANOG	6
Noncanon	GE	HERVW	1205	GATA3	15
Noncanon	GE	HERVH	2044	MAX	2
Noncanon	GE	HERVIP	4735	CTCFL	3
Noncanon	GE	MER34	2836	RCOR1	1
Noncanon	AB	HML2	2976	CTCF	1
Noncanon	S	HERVS	4036	SETDB1	2
Noncanon	GE	HUERSP3	1435	SMC3	1
Noncanon	GE	HERVH	2668	BCL11A	1
Noncanon	GE	HERVH	2891	CEBPB	8
Noncanon	GE	HERV9	3441	MAFK	5
Noncanon	GE	HERV9	1206	RUNX3	13
Noncanon	GE	HARLEQUIN	1575	TBP	11
Noncanon	S	HERVL	4096	RAD21	2
Noncanon	S	THE	4734	CTCF	7
Noncanon	GE	HERVIP	1610	RFX5	17
Noncanon	GE	HERVE	5997	BATF	3
Noncanon	GE	HERV4	2873	JUN	2
Noncanon	GE	HERVH	461	EP300	12
Noncanon	S	THE	4861	GATA3	1
Noncanon	S	THE	4734	ZNF143	4
Noncanon	GE	PRIMA41	1924	RAD21	9
Noncanon	S	THE	606	POLR2A	40
Noncanon	S	MLT	1390	SPI1	1
Noncanon	GE	HUERSP3	3615	FOS	3
Noncanon	AB	HML5	2216	MAFK	8
Noncanon	GE	HERVIP	3387	MAX	14
Noncanon	AB	HML3	1223	TCF7L2	21
Noncanon	GE	HERVH	1605	ATF2	4
Noncanon	GE	HERVH	2296	CEBPB	6
Noncanon	GE	HERV9	5987	FOS	9
Noncanon	GE	HERV9	3611	NFYB	3
Noncanon	GE	HERVE	5997	CEBPB	13
Noncanon	GE	HUERSP3	3615	MAZ	2
Noncanon	GE	HUERSP3	3615	MAX	3
Noncanon	GE	HERVH	3730	POLR2A	1
Noncanon	GE	HERV4	2873	RELA	3
Noncanon	GE	HERV9	3441	NFYB	5
Noncanon	GE	HERVIP	3328	USF1	3
Noncanon	GE	HERVIP	3328	USF2	3
Noncanon	AB	HML9	2674	POLR2A	2
Noncanon	GE	HERVIP	4735	MAFK	15
Noncanon	AB	HML3	1773	ZNF217	1
Noncanon	AB	HML3	1048	MAFK	15
Noncanon	GE	HUERSP3	3615	CBX3	3
Noncanon	AB	HML6	5988	GATA2	1
Noncanon	GE	HUERSP3	1680	ZNF143	4
Noncanon	S	THE	4734	TCF12	5
Noncanon	GE	HERVH	1574	USF1	5
Noncanon	GE	MER34	2836	MYC	4
Noncanon	GE	HERV9	5978	NFYB	7
Noncanon	S	HERVS	4036	CHD1	16
Noncanon	GE	HARLEQUIN	6255	EP300	9
Noncanon	GE	HERVH	1605	BATF	4
Noncanon	AB	HML7	1025	TCF12	1
Noncanon	GE	HERV9	3611	SP1	9
Noncanon	GE	HERVH	2856	SIN3AK20	6
Noncanon	GE	HERVIP	1610	CTCF	4
Noncanon	GE	HERVH	2670	FOXM1	2
Noncanon	GE	HERVH	1505	TEAD4	9
Noncanon	AB	HML3	2900	GATA2	38
Noncanon	AB	HML6	2118	PML	4
Noncanon	GE	HERV9	2297	SPI1	9
Noncanon	GE	HERVH	2670	CTCF	4
Noncanon	GE	PRIMA41	4193	FOS	10
Noncanon	GE	HERVH	2276	FOS	10
Noncanon	GE	HUERSP3	3615	TAL1	2
Noncanon	GE	HERVW	2419	REST	3
Noncanon	GE	HUERSP3	1680	TBL1XR1	1
Noncanon	AB	HML6	2118	POLR2A	66
Noncanon	GE	HERVH	2044	JUND	9
Noncanon	GE	HERVH	4017	PHF8	14
Noncanon	GE	HERVH	3818	EP300	10
Noncanon	GE	RHERVI	1047	POLR2A	4
Noncanon	GE	HUERSP3	3470	POLR2A	10
Noncanon	GE	HERVH	3850	TEAD4	10
Noncanon	GE	HERVFB	2902	GATA2	2
Noncanon	GE	HUERSP3	3615	NFYB	2
Noncanon	GE	HERVIP	4735	CTCF	1
Noncanon	GE	HERVH	1366	FOSL2	7
Noncanon	GE	HERVE	1365	SPI1	10
Noncanon	AB	HML3	4856	GATA3	3
Noncanon	AB	HML3	4856	GATA2	20
Noncanon	AB	HML3	1832	MAFF	14
Noncanon	GE	HARLEQUIN	1575	BATF	13
Noncanon	GE	HERVH	3203	POU5F1	4
Noncanon	GE	HUERSP3	3470	MYC	2
Noncanon	S	THE	4231	JUND	9
Noncanon	GE	LTR25	4126	KAP1	10
Noncanon	GE	PRIMA41	1924	GATA3	1
Noncanon	GE	HERVIP	2847	RAD21	5
Noncanon	GE	HERV30	2924	FOXA1	5
Noncanon	GE	HERVH	2933	JUND	20
Noncanon	GE	HUERSP3	1774	CTCF	1
Noncanon	S	HERVS	4036	HDAC2	11
Noncanon	GE	HERVH	2262	TAF7	9
Noncanon	AB	HML6	2675	STAT3	6
Noncanon	GE	HERV9	3978	SETDB1	3
Noncanon	GE	HUERSP3	1680	NR2F2	2
Noncanon	GE	HERVH	4012	HNF4A	5
Noncanon	S	THE	4734	RAD21	3
Noncanon	GE	HERVE	4466	JUND	7
Noncanon	GE	HERVFC	3392	MAFK	1
Noncanon	GE	HERVE	5729	SPI1	5
Noncanon	GE	HERVFC	3392	YY1	3
Noncanon	S	HERVS	4036	MYC	7
Noncanon	AB	HML1	1385	SMC3	7
Noncanon	GE	HERVE	5729	CTCF	6
Noncanon	GE	HARLEQUIN	4376	ZNF274	4
Noncanon	AB	HML7	1025	NFIC	5
Noncanon	GE	HUERSP3	3615	EP300	7
Noncanon	GE	MER57	478	GATA3	20
Noncanon	GE	HERV30	2924	EP300	1
Noncanon	GE	HERV9	2903	NFYB	10
Noncanon	GE	HERVH	2670	EP300	2
Noncanon	GE	HERV9	2297	BATF	1
Noncanon	GE	RHERVI	1047	EP300	4
Noncanon	S	HERVS	4036	EP300	2
Noncanon	GE	HERV9	6136	NFYB	9
Noncanon	GE	HERVH	3987	TCF12	3
Noncanon	S	THE	606	CTCF	4
Noncanon	GE	MER57	2626	YY1	23
Noncanon	GE	PRIMA41	1718	EP300	3
Noncanon	GE	HERVFB	4633	E2F6	2
Noncanon	S	HERVL	2864	CTCF	11
Noncanon	AB	HML2	5820	RAD21	6
Noncanon	GE	HERV35	3814	KAP1	27
Noncanon	GE	HERVIP	2017	CTCF	4
Noncanon	AB	HML5	2140	SIRT6	1
Noncanon	GE	HARLEQUIN	1575	SPI1	1
Noncanon	AB	HML3	1773	GATA2	21
Noncanon	AB	HML5	2140	TEAD4	2
Noncanon	AB	HML3	1773	GATA3	2
Noncanon	GE	HERVH	507	SPI1	3
Noncanon	AB	HML4	4663	RAD21	5
Noncanon	AB	HML5	4657	TRIM28	3
Noncanon	GE	HERVT	669	RAD21	2
Noncanon	GE	HERVIP	4526	RAD21	8
Noncanon	GE	HERV9	996	FOSL1	10
Noncanon	GE	HERVH	4012	RAD21	2
Noncanon	AB	HML5	2140	MAFF	1
Noncanon	GE	HERV9	6146	NFYB	8
Noncanon	GE	HERVH	4321	JUN	8
Noncanon	GE	HERVH	4736	TBP	1
Noncanon	GE	HERVH	1723	EP300	11
Noncanon	GE	HERVW	2419	FOXA1	17
Noncanon	GE	HERVH	2856	SIN3A	5
Noncanon	GE	HERV9	1842	SPI1	8
Noncanon	GE	HERV4	2873	TCF12	1
Noncanon	GE	HERVFC	597	CTCF	3
Noncanon	GE	HERVE	4641	CTCF	2
Noncanon	GE	HERVH	2044	ATF3	1
Noncanon	AB	HML5	1619	TEAD4	1
Noncanon	GE	HERVH	1574	YY1	1
Noncanon	GE	HERVH	1033	TCF12	7
Noncanon	GE	HUERSP3	3615	GATA2	1
Noncanon	GE	HUERSP3	1680	CTCF	2
Noncanon	AB	HML3	1532	MAFK	6
Noncanon	GE	HERVH	3886	YY1	8
Noncanon	GE	HERVH	4121	ZNF217	2
Noncanon	GE	HERVH	4012	NANOG	1
Noncanon	S	HERVL	2495	CTCF	21
Noncanon	GE	HERV9	1352	NFYB	8
Noncanon	GE	HUERSP3	3615	SP1	1
Noncanon	GE	HERV30	2924	TCF7L2	8
Noncanon	GE	HERVH	2670	ATF2	1
Noncanon	GE	HERVH	3987	POU2F2	2
Noncanon	GE	HERVFC	597	YY1	3
Noncanon	GE	HERVFB	4633	GATA2	4
Noncanon	AB	HML7	1951	CTCF	7
Noncanon	GE	HERVH	3731	EP300	2
Noncanon	S	HERVL	2864	RAD21	1
Noncanon	GE	HERV9	4056	CTCF	9
Noncanon	AB	HML6	5988	ZNF217	8
Noncanon	AB	HML5	3618	CTCF	9
Noncanon	GE	HERV9	2443	NFYB	4
Noncanon	GE	HERV1	1086	CTCF	4
Noncanon	GE	HERV9	6146	MAFK	12
Noncanon	GE	HERV4	717	KAP1	19
Noncanon	GE	HERVH	1605	NFIC	2
Noncanon	AB	HML3	1532	ZNF143	7
Noncanon	GE	PRIMA41	4243	CEBPB	7
Noncanon	GE	ERV1_ARTIODACT	4028	MAFK	9
Noncanon	GE	HERV30	2924	ESR1	2
Noncanon	AB	HML6	2118	FOXM1	4
Noncanon	GE	HERV9	2251	MAFK	7
Noncanon	GE	HERVIP	2812	MAFK	1
Noncanon	GE	HERVIP	3387	TAF1	1
Noncanon	AB	HML4	4663	CTCF	4
Noncanon	AB	HML3	1591	JUND	14
Noncanon	GE	HERV30	1008	RAD21	15
Noncanon	S	THE	4231	RAD21	2
Noncanon	GE	HARLEQUIN	2823	EP300	8
Noncanon	AB	HML5	4680	EP300	6
Noncanon	AB	HML3	2900	GATA3	9
Noncanon	GE	HERVH	4736	POLR2A	15
Noncanon	GE	HERV4	717	ZNF143	14
Noncanon	GE	HERVH	3675	GATA2	4
Noncanon	GE	HERV30	1008	CTCF	1
Noncanon	AB	HML3	1048	GATA2	8
Noncanon	GE	HERVH	4321	FOS	3
Noncanon	S	THE	606	RUNX3	5
Noncanon	AB	HML5	4657	JUND	1
Noncanon	GE	HUERSP3	1675	RAD21	8
Noncanon	GE	HERVH	1035	JUND	11
Noncanon	GE	HARLEQUIN	1013	POLR2A	12
Noncanon	GE	HERVH	2044	CHD2	2
Noncanon	GE	HUERSP3	1675	CTCF	12
Noncanon	GE	HERVH	4401	MAFF	5
Noncanon	GE	HERV9	996	RAD21	11
Noncanon	GE	HUERSP3	766	RFX5	1
Noncanon	GE	HERV9	2297	SP1	6
Noncanon	GE	HERV9	3448	NFYB	11
Noncanon	GE	HERV9	3258	NFYB	11
Noncanon	GE	MER41	3561	CEBPB	10
Noncanon	GE	HERVH	1599	USF1	11
Noncanon	S	HERVS	4036	MAFF	6
Noncanon	GE	HERVH	3730	YY1	4
Noncanon	GE	LTR25	4126	JUND	5
Noncanon	GE	HERV9	914	MAFF	2
Noncanon	AB	HML5	4657	ATF1	1
Noncanon	AB	HML3	1716	GATA3	3
Noncanon	S	THE	4861	TCF7L2	14
Noncanon	S	MST	1696	CTCF	4
Noncanon	GE	ERV1_ARTIODACT	4028	KAP1	27
Noncanon	GE	HERVH	1182	TEAD4	10
Noncanon	GE	HERV9	2297	USF1	7
Noncanon	GE	HERVH	2668	TCF12	2
Noncanon	GE	HUERSP3	1680	TAL1	1
Noncanon	GE	HERVADP	4035	HDAC6	8
Noncanon	S	HERVL	851	SETDB1	29
Noncanon	GE	HUERSP3	1680	ARID3A	1
Noncanon	GE	HUERSP2	1615	CTCF	5
Noncanon	GE	HERVE	995	SPI1	12
Noncanon	GE	HERV9	1206	CHD2	2
Noncanon	GE	HERVIP	4735	BHLHE40	1
Noncanon	GE	HERV3	3489	CTCF	6
Noncanon	AB	HML6	2118	ZNF143	1
Noncanon	GE	HERV1	1086	NFYB	6
Noncanon	GE	HERVH	991	MAFK	7
Noncanon	GE	HUERSP3	3615	POLR2A	8
Noncanon	GE	HUERSP3	766	RAD21	10
Noncanon	GE	HUERSP3	3615	MYC	4
Noncanon	GE	MER4	1598	MAFF	8
Noncanon	S	THE	4231	TCF12	1
Noncanon	GE	HUERSP3	766	FOXM1	4
Noncanon	GE	RHERVI	1047	TCF7L2	10
Noncanon	GE	HERVW	1205	TCF7L2	18
Noncanon	AB	HML6	2118	CTCF	2
Noncanon	GE	HUERSP3	766	CTCF	4
Noncanon	GE	HERVH	2899	REST	6
Noncanon	GE	HERVH	1997	JUN	3
Noncanon	GE	HERVH	4736	TAL1	6
Noncanon	GE	HERVH	4401	RAD21	3
Noncanon	AB	HML5	2140	SETDB1	25
Noncanon	GE	HERVE	5997	EP300	11
Noncanon	GE	HERVFB	2902	CEBPB	2
Noncanon	GE	HERVH	2044	TCF7L2	1
Noncanon	GE	HERVH	4868	ESR1	7
Noncanon	GE	HERVH	2044	POLR2A	4
Noncanon	GE	MER57	1579	GATA3	4
Noncanon	GE	HERV9	1783	NFYB	10
Noncanon	S	MLT	1390	RAD21	1
Noncanon	AB	HML6	1785	EP300	1
Noncanon	GE	HERVH	1599	CTCF	9
Noncanon	GE	HUERSP3	3615	SMARCA4	1
Noncanon	GE	HERVH	1574	MAX	1
Noncanon	GE	HERVFC	3392	RAD21	5
Noncanon	GE	HERV9	2761	MAFK	5
Noncanon	S	HERVL	735	RAD21	1
Noncanon	GE	HARLEQUIN	475	RUNX3	1
Noncanon	GE	HERVH	6088	SP1	8
Noncanon	GE	HERVE	2977	CTCF	3
Noncanon	GE	HERV1	1086	FOXA1	7
Noncanon	GE	HUERSP3	3615	RAD21	18
Noncanon	GE	HERVT	4676	NR2F2	1
Noncanon	GE	HERVH	3389	TAL1	7
Noncanon	GE	HARLEQUIN	4376	ZNF143	9
Noncanon	GE	HERV9	5987	USF1	5
Noncanon	AB	HML5	1619	TCF7L2	11
Noncanon	GE	HERV9	1783	CEBPB	9
Noncanon	GE	HARLEQUIN	1013	GATA3	20
Noncanon	AB	HML2	4636	RAD21	8
Noncanon	GE	HERVFB	4633	CCNT2	1
Noncanon	GE	HERVH	2276	MAFK	11
Noncanon	AB	HML6	5988	CTCF	9
Noncanon	GE	MER4	1550	ZNF143	1
Noncanon	GE	HERVH	2667	TAF1	12
Noncanon	GE	MER57	1579	GATA2	11
Noncanon	AB	HML3	2472	CTCF	7
Noncanon	AB	HML6	2118	MTA3	2
Noncanon	GE	HUERSP3	3470	EP300	2
Noncanon	AB	HML5	2140	ATF3	4
Noncanon	GE	HERVH	2266	CEBPB	3
Noncanon	S	MST	4780	FOS	12
Noncanon	GE	HERVH	3987	SPI1	5
Noncanon	GE	ERV1_ARTIODACT	4028	STAT3	11
Noncanon	GE	HERV9	763	NFYB	11
Noncanon	GE	HERV9	1842	RELA	1
Noncanon	S	MST	1696	MAFK	2
Noncanon	GE	HARLEQUIN	3838	EP300	17
Noncanon	GE	HUERSP3	766	ZNF143	3
Noncanon	GE	HERVE	1300	CTCF	9
Noncanon	GE	HERVH	2262	SP4	1
Noncanon	AB	HML6	2118	RAD21	14
Noncanon	GE	HUERSP3	766	REST	5
Noncanon	GE	HERVH	1574	TEAD4	19
Noncanon	GE	MER34	2836	RFX5	1
Noncanon	AB	HML5	2140	MAFK	8
Noncanon	AB	HML3	2472	RAD21	6
Noncanon	GE	HUERSP3	766	BCL11A	1
Noncanon	GE	HERVH	507	TEAD4	6
Noncanon	GE	HERVH	1366	TEAD4	4
Noncanon	AB	HML9	2674	CEBPB	2
Noncanon	AB	HML2	5820	SETDB1	15
Noncanon	AB	HML5	4680	FOXA1	6
Noncanon	GE	LTR25	4126	RAD21	4
Noncanon	GE	HERVE	982	RAD21	8
Noncanon	AB	HML6	5988	GATA3	15
Noncanon	GE	HARLEQUIN	6255	GATA1	33
Noncanon	GE	HERV9	1842	ATF2	1
Noncanon	S	THE	606	ZNF143	1
Noncanon	AB	HML3	886	EP300	1
Noncanon	GE	MER4	1550	CTCF	7
Noncanon	GE	HERVE	2977	RELA	2
Noncanon	GE	HUERSP3	3615	SETDB1	1
Noncanon	GE	HERVFB	2902	FOS	2
Noncanon	GE	HERV9	1201	FOXA1	9
Noncanon	GE	HUERSP3	1774	RAD21	6
Noncanon	GE	HERVIP	3328	EP300	5
Noncanon	AB	HML6	2118	FOS	3
Noncanon	AB	HML5	1619	FOXA1	1
Noncanon	AB	HML8	4683	CTCF	5
Noncanon	GE	HERVIP	3632	RAD21	38
Noncanon	AB	HML5	4680	TFAP2C	2
Noncanon	AB	HML5	4680	TFAP2A	1
Noncanon	AB	HML2	5820	POLR2A	1
Noncanon	GE	HERVIP	3328	JUND	3
Noncanon	GE	HERV4	717	FOS	8
Noncanon	GE	HERVH	3256	GATA3	12
Noncanon	GE	HUERSP3	1680	PML	1
Noncanon	GE	HERVH	3675	POLR2A	2
Noncanon	GE	HERV1	1086	EP300	2
Noncanon	GE	HERVH	5939	SPI1	8
Noncanon	GE	HUERSP2	1615	RAD21	4
Noncanon	GE	HERV9	2815	NFYB	13
Noncanon	AB	HML2	4636	CTCF	4
Noncanon	GE	HARLEQUIN	1013	EP300	2
Noncanon	AB	HML6	2675	JUN	8
Noncanon	AB	HML3	4856	EP300	6
Noncanon	GE	HERVH	4121	FOXA1	7
Noncanon	GE	HUERSP3	1675	SETDB1	1
Noncanon	GE	MER34	2836	JUND	5
Noncanon	GE	HERV9	2297	RUNX3	1
Noncanon	AB	HML3	1773	TCF7L2	6
Noncanon	GE	HERVIP	4735	POLR2A	14
Noncanon	GE	HERV9	1206	MXI1	1
Noncanon	GE	HERVIP	3328	SP1	1
Noncanon	GE	HUERSP3	3615	CEBPB	2
Noncanon	GE	HERVH	2670	SPI1	2
Noncanon	AB	HML5	2140	BCL11A	4
Noncanon	AB	HML7	3456	GATA3	21
Noncanon	GE	LTR38	2878	SETDB1	1
Noncanon	GE	HERVH	1505	SIN3A	6
Noncanon	GE	HERVH	2683	MAFF	2
Noncanon	GE	LTR38	2878	KAP1	24
Noncanon	AB	HML3	988	GATA2	18
Noncanon	AB	HML2	1793	RAD21	6
Noncanon	GE	HERVFA	3907	CTCF	4
Noncanon	GE	HERVW	1200	MAFK	1
Noncanon	GE	LTR25	4126	CEBPB	5
Noncanon	GE	HERVIP	1610	RAD21	10
Noncanon	GE	HERVH	2683	MAFK	3
Noncanon	GE	HERV9	2297	RELA	7
Noncanon	GE	HERV4	717	STAT3	3
Noncanon	GE	HERVW	1205	MAFF	1
Noncanon	GE	HERVE	1365	NR3C1	18
Noncanon	GE	HERVFC	3392	BACH1	3
Noncanon	GE	HERVIP	3387	SETDB1	12
Noncanon	GE	HERVH	4736	TAF1	1
Noncanon	GE	HERVE	2977	RAD21	7
Noncanon	S	THE	606	RELA	5
Noncanon	GE	HERVH	4548	USF1	3
Noncanon	GE	HERV9	914	NFYB	6
Noncanon	GE	HERVIP	2017	RAD21	13
Noncanon	GE	HERVH	4012	USF1	3
Noncanon	GE	HERVH	2938	TCF7L2	4
Noncanon	GE	HERV9	517	NFYB	8
Noncanon	GE	HERV30	1008	FOSL1	1
Noncanon	GE	HERVH	4736	MAX	22
Noncanon	GE	HERV9	1842	NFYB	4
Noncanon	GE	HUERSP3	3468	CTCF	25
Noncanon	GE	HERVH	3730	REST	5
Noncanon	GE	MER57	781	JUND	4
Noncanon	GE	HERVH	461	CBX3	1
Noncanon	AB	HML8	1429	NR3C1	1
Noncanon	GE	HARLEQUIN	1013	ZNF217	3
Noncanon	S	MST	4780	STAT3	1
Noncanon	S	HERVL	2495	MAFK	13
Noncanon	GE	HERVIP	4735	SETDB1	11
Noncanon	GE	HERVH	3256	EP300	10
Noncanon	GE	HERVW	3985	KAP1	15
Noncanon	S	HERVL	2495	MAFF	1
Noncanon	GE	HERVH	2668	SP1	5
Noncanon	GE	HERVH	3731	FOSL2	2
Noncanon	GE	HERV1	915	CTCF	1
Noncanon	GE	HERVH	3987	RELA	3
Noncanon	GE	HERVIP	4735	SMC3	1
Noncanon	GE	HERV35	3814	SETDB1	30
Noncanon	AB	HML9	2674	BRF2	8
Noncanon	GE	HERVH	1691	CTCF	7
Noncanon	GE	HERVH	4868	TCF7L2	5
Noncanon	AB	HML5	2140	BACH1	1
Noncanon	AB	HML1	1782	ZNF143	17
Noncanon	GE	HERVIP	3387	MYC	2
Noncanon	GE	HUERSP3	1680	CBX3	1
Noncanon	S	HERVL	851	CEBPB	2
Noncanon	GE	HERVH	1590	CEBPB	7
Noncanon	GE	HERVFB	2902	USF1	9
Noncanon	GE	HUERSP3	3470	NFIC	2
Noncanon	GE	HERVW	1205	ZNF217	1
Noncanon	AB	HML3	1223	GATA3	4
Noncanon	AB	HML1	4640	REST	2
Noncanon	GE	HERVH	4012	SMC3	1
Noncanon	AB	HML5	4657	TAL1	7
Noncanon	GE	HERV9	5999	PAX5	6
Noncanon	GE	HERVE	5729	RAD21	4
Noncanon	S	THE	4231	TCF3	6
Noncanon	GE	HERVH	1663	ZNF143	13
Noncanon	GE	HERV9	1206	RELA	12
Noncanon	GE	HERVE	5997	REST	12
Noncanon	GE	HERVIP	2812	CBX3	15
Noncanon	GE	HERVH	852	CEBPB	8
Noncanon	GE	HERVH	4868	ZNF217	7
Noncanon	AB	HML3	3966	MAFF	2
Noncanon	GE	HERVH	4012	EP300	2
Noncanon	GE	HERVH	1605	RUNX3	9
Noncanon	GE	HERV4	2873	BCL11A	12
Noncanon	GE	HERVIP	3632	KAP1	3
Noncanon	GE	HERVIP	3387	EP300	1
Noncanon	GE	HERV9	2251	NFYB	6
Noncanon	GE	HERVIP	4735	KAP1	14
Noncanon	GE	HERV9	3616	USF1	9
Noncanon	GE	HERVW	1205	MAFK	7
Noncanon	GE	HERVH	2044	EP300	1
Noncanon	GE	HERV30	2924	RAD21	12
Noncanon	GE	HERV30	2924	SPI1	23
Noncanon	GE	MER57	781	TEAD4	13
Noncanon	GE	HERVE	1365	CTCF	10
Noncanon	GE	HERVFC	3392	MAFF	7
Noncanon	GE	HERV9	996	ZNF143	2
Noncanon	GE	HERV9	1371	RAD21	4
Noncanon	GE	HERV9	3978	KAP1	29
Noncanon	AB	HML6	4665	MAFK	5
Noncanon	GE	HERVIP	3328	FOSL2	5
Noncanon	GE	HERVH	1033	POU5F1	1
Noncanon	GE	HERVE	982	CTCF	5
Noncanon	AB	HML6	4093	GATA3	29
Noncanon	GE	HERVH	3987	MAFK	2
Noncanon	S	THE	606	YY1	22
Noncanon	GE	HERV9	2761	MAFF	1
Noncanon	GE	HERVH	1274	ESR1	6
Noncanon	S	HERVL	463	STAT3	3
Noncanon	GE	HERVIP	2180	SETDB1	9
Noncanon	AB	HML8	1429	FOS	11
Noncanon	GE	HERVH	4012	MYBL2	6
Noncanon	GE	HERVFC	597	RAD21	8
Noncanon	GE	PRIMA41	3461	ESR1	11
Noncanon	GE	HERV1	1086	GATA3	14
Noncanon	GE	HERVH48	668	EP300	7
Noncanon	GE	PRIMA41	1924	POLR2A	16
Noncanon	GE	HUERSP3	2094	KAP1	22
Noncanon	AB	HML6	2118	TAF1	4
Noncanon	GE	RHERVI	1047	SPI1	5
Noncanon	GE	HERVIP	2017	SRF	16
Noncanon	S	THE	606	RAD21	5
Noncanon	GE	HERVE	3991	SPI1	8
Noncanon	GE	HERVH	1574	POU5F1	6
Noncanon	S	HERVL	1158	GATA2	18
Noncanon	GE	RHERVI	1047	FOXP2	5
Noncanon	GE	HERVIP	2812	FOS	5
Noncanon	AB	HML1	4640	GATA3	30
Noncanon	GE	MER34	2836	EP300	1
Noncanon	GE	HERVH	3389	GATA2	4
Noncanon	GE	HERV9	1031	NFYB	14
Noncanon	GE	HERVH	1149	MAX	11
Noncanon	GE	HERV9	5987	NFYB	9
Noncanon	GE	HERVIP	4526	MAFK	5
Noncanon	GE	PRIMA41	3461	FOXA1	5
Noncanon	AB	HML6	5988	SPI1	13
Noncanon	GE	HERVIP	3387	TBP	1
Noncanon	GE	HERV9	2903	FOSL1	3
Noncanon	GE	HUERSP3	766	SPI1	15
Noncanon	GE	HERVW	2419	GATA3	18
Noncanon	GE	HERVW	2419	GATA2	9
Noncanon	GE	HERVW	3443	GATA3	2
Noncanon	GE	HERVIP	3328	SIX5	8
Noncanon	GE	HERVH	4012	FOXA1	3
Noncanon	S	HERVL	4096	CTCF	4
Noncanon	GE	HERVH	3987	CEBPB	6
Noncanon	GE	MER34	2836	TCF7L2	3
Noncanon	AB	HML2	5820	BHLHE40	7
Noncanon	GE	HERVH	805	KAP1	18
Noncanon	GE	HERVE	4466	CTCF	24
Noncanon	GE	HUERSP3	1435	POLR2A	5
Noncanon	GE	MER66	3351	CTCF	3
Noncanon	GE	HERV4	2873	FOXA1	7
Noncanon	AB	HML9	2674	STAT3	8
Noncanon	GE	PRIMA41	1924	GATA2	2
Noncanon	GE	HERVT	4676	RAD21	16
Noncanon	GE	HERVIP	4526	CTCF	1
Noncanon	GE	MER41	3561	POLR2A	11
Noncanon	S	HERVL	2495	RAD21	22
Noncanon	GE	HERV1	915	WRNIP1	5
Noncanon	GE	HERVIP	4735	CHD2	3
Noncanon	GE	HARLEQUIN	1575	ESR1	5
Noncanon	GE	HERVH	852	RAD21	7
Noncanon	AB	HML6	2675	SPI1	2
Noncanon	AB	HML7	1025	SP1	3
Noncanon	GE	HERVT	4676	CTCF	3
Noncanon	GE	HUERSP3	3615	FOSL1	4

## Sheet: Alternative Splice Site
HERV Sequence	HERV genus	HERV groups	HERV ID	Functional site	number of SNVs
Canon	S	HERVL	4189	altPromoter	4
Canon	GE	HERVT	4229	atacIntron	5
Canon	GE	HERVT	4229	strangeSplice	258
Noncanon	S	THE	606	strangeSplice	294
Noncanon	S	THE	4231	strangeSplice	291
Noncanon	GE	HERVH	611	strangeSplice	225
Noncanon	S	MST	4780	altPromoter	5
Noncanon	GE	HERVFC	3392	altPromoter	8

## Sheet: Pseudo Exon
HERV Sequence	HERV genus	HERV groups	HERV ID	Functional site	number of SNVs
Canon	GE	HERVFRD	6139	PGOHUM00000245128	6
Canon	AB	HML3	1434	PGOHUM00000245932	12
Canon	GE	HERVFRD	1388	PGOHUM00000245895	64
Noncanon	S	HERVL	2864	PGOHUM00000249719	7
Noncanon	GE	HERVH	4017	PGOHUM00000248448	7
Noncanon	S	THE	4231	PGOHUM00000247971	14
Noncanon	S	THE	4231	PGOHUM00000247972	4
Noncanon	GE	HERVFB	4633	PGOHUM00000234552	1
Noncanon	S	MST	4780	PGOHUM00000234793	1
Noncanon	GE	HERV9	3611	PGOHUM00000242433	10
Noncanon	GE	HERVW	4673	PGOHUM00000234255	40
Noncanon	GE	HERVH	1245	PGOHUM00000238274	2
Noncanon	S	MLT	1390	PGOHUM00000245510	1

## Sheet: CpG Island
HERV Sequence	HERV genus	HERV groups	HERV ID	Functional site	number of SNVs
Canon	GE	HERVT	4229	CpG: 41	1
Canon	GE	HERV9	2542	CpG: 23	3
Canon	GE	LTR46	3609	CpG: 25	5
Noncanon	GE	HERVFB	2902	CpG: 20	11
Noncanon	GE	MER66	3351	CpG: 23	2
Noncanon	GE	HERV9	3258	CpG: 23	8
Noncanon	GE	HERVH	2044	CpG: 20	15
Noncanon	AB	HML5	4680	CpG: 26	5
Noncanon	GE	HERVH	3963	CpG: 23	9
Noncanon	GE	HERVH	3886	CpG: 23	3
Noncanon	GE	HERVIP	2017	CpG: 23	4
Noncanon	GE	HUERSP3	1680	CpG: 64	37
Noncanon	GE	HERVFB	2902	CpG: 30	27
